# Supplementary material for: Global biome changes over the last 21 000 years inferred from model–data comparisons
Source: Copernicus journal article supplement (doi:10.5194/cp-21-1001-2025), 2025-06-11
Supplement: Supplementary file 1 [file cp-21-1001-2025-supplement.zip]

## Sheet: Observation
Source	Longitude	Latitude	BIO1	BIO4	BIO8	BIO9	BIO10	BIO11	BIO12	BIO13	BIO14	BIO15	BIO16	BIO17	BIO18	BIO19
MPI-ESM_GLAC1D	-37.5	83.4789	-17.2743	1318.22	0.551538	-31.8951	0.551538	-31.8951	237.97	36.4878	10.2641	46.1109	97.9688	32.719	97.9688	32.719
MPI-ESM_GLAC1D	-33.75	83.4789	-17.2088	1323.63	0.672632	-31.8593	0.672632	-31.8593	249.563	39.2573	10.7642	47.99	105.937	33.9336	105.937	33.9336
MPI-ESM_GLAC1D	-30	83.4789	-17.2442	1330.08	0.791772	-31.7421	0.791772	-31.8867	256.734	41.1343	11.2375	47.6765	108.166	35.9532	108.166	35.7995
MPI-ESM_GLAC1D	-26.25	83.4789	-17.0331	1329.21	-2.26668	-31.4641	0.938908	-31.6588	258.516	40.1912	11.8261	44.1158	105.361	38.659	102.979	38.3226
MPI-ESM_GLAC1D	15	79.777	-9.48847	923.935	2.41287	-18.6846	2.41287	-19.8704	246.987	30.1816	15.6622	24.3198	80.8532	48.7942	80.8532	50.5518
MPI-ESM_GLAC1D	18.75	79.777	-9.50654	899.99	1.36809	-18.641	2.03917	-19.7213	254.287	32.0556	16.0964	24.2355	83.822	48.8166	82.4891	50.7437
MPI-ESM_GLAC1D	101.25	79.777	-14.3824	1233.19	-0.408606	-28.8274	0.694767	-28.8274	218.117	31.175	10.2083	38.0721	83.9075	31.5488	79.7456	31.5488
MPI-ESM_GLAC1D	-86.25	79.777	-15.1107	1386.1	-0.0205851	-31.7526	2.57107	-31.7526	251.271	36.6603	9.71657	45.2432	99.6334	29.7249	97.9275	29.7249
MPI-ESM_GLAC1D	-82.5	79.777	-15.2243	1380.9	-0.157955	-31.6881	2.53787	-31.6881	263.285	38.6134	9.98554	45.6754	105.068	30.6268	103.43	30.6268
MPI-ESM_GLAC1D	-78.75	79.777	-16.3472	1226.22	-8.2349	-31.0826	-0.45367	-31.0826	246.118	35.8248	10.3983	41.9754	98.6356	32.1127	84.0485	32.1127
MPI-ESM_GLAC1D	-75	79.777	-15.6978	1348.1	1.96169	-31.5208	1.96169	-31.5208	303.311	44.5434	11.0171	46.7987	121.725	33.9498	121.725	33.9498
MPI-ESM_GLAC1D	-71.25	79.777	-16.0368	1316.53	1.39659	-31.3125	1.39659	-31.3125	322.745	48.5267	11.4743	48.8477	133.705	34.9986	133.705	34.9986
MPI-ESM_GLAC1D	-67.5	79.777	-16.4847	1283.52	0.698022	-31.1946	0.698022	-31.1946	326.313	49.4214	11.5569	49.7538	136.897	35.1072	136.897	35.1072
MPI-ESM_GLAC1D	-63.75	79.777	-17.7552	1115.74	-5.27124	-30.4518	-2.52659	-30.4518	275.452	41.885	11.15	44.6069	111.635	33.6501	100.078	33.6501
MPI-ESM_GLAC1D	-60	79.777	-18.4566	1091.92	-6.11889	-30.6009	-3.36448	-30.6009	251.588	38.2328	10.1675	44.4466	102.812	31.5437	92.6407	31.5437
MPI-ESM_GLAC1D	-56.25	79.777	-19.1533	1073.04	-6.94962	-30.8834	-4.20562	-30.8834	232.424	35.264	9.20525	45.0655	96.2555	28.9919	87.3463	28.9919
MPI-ESM_GLAC1D	-52.5	79.777	-19.8509	1059.03	-7.74194	-31.261	-5.02724	-31.261	215.121	32.5069	8.43127	45.5436	90.1344	26.9417	82.126	26.9417
MPI-ESM_GLAC1D	-48.75	79.777	-20.4999	1051.65	-8.44702	-31.692	-5.7193	-31.692	199.338	29.6716	7.7933	45.299	83.8768	25.2888	76.6523	25.2888
MPI-ESM_GLAC1D	-45	79.777	-20.9981	1050.85	-8.94246	-32.0755	-6.18349	-32.0755	187.063	27.3555	7.50792	44.5356	78.4937	24.5253	72.0692	24.5253
MPI-ESM_GLAC1D	-41.25	79.777	-21.2725	1055.2	-9.15014	-32.2942	-6.37164	-32.2942	180.962	26.448	7.53968	43.0604	75.2042	25.0829	69.6252	25.0829
MPI-ESM_GLAC1D	-37.5	79.777	-21.2202	1066.4	-8.9392	-32.2897	-6.16591	-32.2897	186.405	27.1902	8.14197	41.7829	76.7892	27.3869	71.8355	27.3869
MPI-ESM_GLAC1D	-33.75	79.777	-20.8249	1086.06	-8.28686	-32.0579	-5.51357	-32.0579	203.417	28.9032	9.45831	40.7822	83.1629	31.5564	78.2951	31.5564
MPI-ESM_GLAC1D	-30	79.777	-20.1463	1105.14	-7.36954	-31.6061	-4.61187	-31.6061	230.619	32.6902	11.5125	40.1262	93.737	37.4863	88.0096	37.4863
MPI-ESM_GLAC1D	-26.25	79.777	-19.2303	1119.91	-6.29402	-28.9001	-3.57021	-30.9492	268.419	37.7276	13.4756	39.3876	108.068	44.6094	101.159	45.3185
MPI-ESM_GLAC1D	-22.5	79.777	-17.3255	1234.09	-0.397681	-27.7647	-0.397681	-30.3789	345.376	53.9363	15.7251	46.6756	144.888	52.663	144.888	54.1053
MPI-ESM_GLAC1D	-18.75	79.777	-16.3425	1234.15	-2.16251	-26.9984	0.520939	-29.4993	368.77	52.0912	17.659	40.5936	148.372	59.9137	140.521	62.1199
MPI-ESM_GLAC1D	97.5	76.0702	-13.2813	1366.75	2.58228	-28.7154	3.98383	-29.8697	279.666	40.4931	11.1771	47.7077	115.658	34.3659	115.323	34.2996
MPI-ESM_GLAC1D	101.25	76.0702	-13.6542	1387.77	3.97862	-29.2259	3.97862	-30.3821	273.987	41.5619	10.2542	51.2966	117.826	31.6429	117.826	31.5158
MPI-ESM_GLAC1D	105	76.0702	-13.9437	1392.24	2.17017	-29.5859	3.74945	-30.7395	231.989	35.2176	9.62453	44.9872	96.7812	29.4774	89.2945	29.3259
MPI-ESM_GLAC1D	108.75	76.0702	-14.2539	1392.72	1.79517	-29.929	3.43826	-31.0787	221.697	34.2683	9.32422	44.3883	91.8387	28.7394	80.2764	28.5098
MPI-ESM_GLAC1D	-116.25	76.0702	-13.3591	1303.03	0.783451	-29.4785	2.70453	-29.4785	204.487	29.33	9.54273	35.2882	76.2318	32.0147	72.6276	32.0147
MPI-ESM_GLAC1D	-112.5	76.0702	-13.3539	1318.81	0.954024	-29.649	2.95844	-29.649	205.109	29.4444	9.3014	35.5693	76.7325	31.3617	71.8039	31.3617
MPI-ESM_GLAC1D	-86.25	76.0702	-12.9479	1437.12	4.98188	-30.6139	4.98188	-30.6139	272.791	36.8515	10.6334	44.9905	108.015	32.8564	108.015	32.8564
MPI-ESM_GLAC1D	-82.5	76.0702	-12.6786	1436.56	3.14738	-30.2727	5.33083	-30.2727	278.38	36.4269	11.2566	42.3929	107.647	34.4412	106.221	34.4412
MPI-ESM_GLAC1D	-60	76.0702	-16.182	966.844	-5.29793	-26.7662	-2.76031	-26.7662	338.559	45.1274	15.5485	36.5851	126.542	50.2122	121.292	50.2122
MPI-ESM_GLAC1D	-56.25	76.0702	-17.8534	929.979	-4.73752	-27.5631	-4.73752	-27.5631	328.491	46.1357	13.7919	43.1979	130.753	44.7924	130.753	44.7924
MPI-ESM_GLAC1D	-52.5	76.0702	-19.7609	895.453	-9.55184	-28.8906	-7.10667	-28.8906	312.186	44.3358	12.3669	45.1806	126.284	40.0484	125.895	40.0484
MPI-ESM_GLAC1D	-48.75	76.0702	-21.6395	891.515	-11.4848	-30.6067	-9.05979	-30.6067	288.586	41.0995	11.1289	45.436	117.56	35.8413	115.651	35.8413
MPI-ESM_GLAC1D	-45	76.0702	-23.265	910.221	-12.9158	-32.3763	-10.4537	-32.8287	248.07	34.6347	9.86235	42.9532	99.6194	31.8118	96.2258	30.4685
MPI-ESM_GLAC1D	-41.25	76.0702	-24.375	936.727	-13.7087	-33.7408	-11.2297	-34.319	201.63	26.987	9.04397	37.7014	78.437	28.8308	73.4539	27.7922
MPI-ESM_GLAC1D	-37.5	76.0702	-24.9053	950.992	-14.0629	-34.3906	-11.6021	-35.067	167.867	21.758	8.75169	32.4159	63.2695	27.7748	57.5473	26.8894
MPI-ESM_GLAC1D	-33.75	76.0702	-24.6607	959.063	-13.71	-34.8684	-11.2545	-34.8684	166.235	22.0526	9.59647	32.4889	64.0686	29.6396	57.2981	29.6396
MPI-ESM_GLAC1D	-30	76.0702	-23.4305	973.245	-12.2231	-26.0279	-9.87685	-33.7845	203.261	28.0643	11.2346	35.5744	81.0919	36.1291	70.9096	38.2187
MPI-ESM_GLAC1D	-26.25	76.0702	-21.3065	991.127	-9.70678	-24.2635	-7.60146	-31.9036	274.618	38.5317	14.4976	37.4249	110.928	47.4388	95.5635	53.2752
MPI-ESM_GLAC1D	-22.5	76.0702	-17.6634	1105.17	-4.60978	-20.6594	-2.63792	-29.5872	405.769	61.7011	19.6902	43.9927	172.702	67.2207	158.977	73.5657
MPI-ESM_GLAC1D	52.5	72.3616	-8.49042	1006.66	3.47341	-21.0397	3.82316	-20.6725	344.799	42.0695	18.4362	30.9645	119.38	57.4681	118.376	58.0545
MPI-ESM_GLAC1D	56.25	72.3616	-9.4289	1080.41	-0.018103	-23.0481	3.65975	-22.3632	358.66	45.8909	19.8494	27.9754	119.948	60.994	118.861	61.7188
MPI-ESM_GLAC1D	67.5	72.3616	-11.2463	1236.15	3.48202	-25.5657	4.05935	-26.8665	385.644	47.8972	20.6473	30.787	137.921	63.1015	126.238	62.8788
MPI-ESM_GLAC1D	71.25	72.3616	-11.4157	1274.1	3.719	-26.0097	4.48643	-27.4329	378.232	47.5667	19.5986	32.9895	138.253	59.7182	128.389	59.0867
MPI-ESM_GLAC1D	75	72.3616	-11.4873	1304.83	4.00546	-26.2962	4.94021	-27.7962	368.482	47.1055	18.4876	35.0255	137.541	56.8005	128.427	56.0561
MPI-ESM_GLAC1D	78.75	72.3616	-11.5287	1332.83	4.27759	-26.5319	5.39399	-28.0709	357.845	46.78	17.0231	37.0644	135.712	53.5464	126.545	52.9795
MPI-ESM_GLAC1D	82.5	72.3616	-11.6224	1360.98	4.48593	-26.7994	5.81195	-28.3509	351.709	47.2287	15.6886	40.1959	138.125	50.3757	127.86	49.988
MPI-ESM_GLAC1D	86.25	72.3616	-11.8548	1391.98	4.59465	-27.2395	6.13943	-28.8046	353.436	51.4503	14.6231	44.0321	142.759	47.3611	135.604	46.5269
MPI-ESM_GLAC1D	90	72.3616	-12.1885	1423.92	4.60767	-27.7903	6.36534	-29.4153	360.932	56.5571	14.0035	48.1328	150.689	45.1925	146.39	43.7988
MPI-ESM_GLAC1D	93.75	72.3616	-12.6651	1464.02	4.54452	-28.5957	6.52224	-30.2812	367.122	63.5078	13.2836	53.5373	160.64	42.7237	158.753	40.8738
MPI-ESM_GLAC1D	97.5	72.3616	-13.1673	1504.56	6.6186	-29.4746	6.6186	-31.2239	366.638	68.0236	12.5348	58.3972	167.712	39.8977	167.712	37.8464
MPI-ESM_GLAC1D	101.25	72.3616	-13.586	1538.9	6.67784	-30.2565	6.67784	-32.0208	361.537	70.0386	11.5982	62.8907	173.774	36.7257	173.774	34.9012
MPI-ESM_GLAC1D	105	72.3616	-13.8654	1564.63	6.74099	-30.8287	6.74099	-32.6054	349.821	67.9536	10.8221	65.0118	172.426	34.2568	172.426	32.6419
MPI-ESM_GLAC1D	108.75	72.3616	-14.0303	1582.11	6.76899	-31.2526	6.76899	-33.0455	330.232	62.087	10.0221	65.3891	164.279	31.7313	164.279	30.2664
MPI-ESM_GLAC1D	112.5	72.3616	-14.0804	1589.78	6.76964	-31.4531	6.76964	-33.2597	300.434	52.7239	9.35443	62.6273	145.515	29.7493	145.515	28.5011
MPI-ESM_GLAC1D	116.25	72.3616	-14.0873	1587.77	6.67328	-31.5188	6.67328	-33.3235	269.212	43.08	8.71453	58.3448	125.133	28.4956	125.133	27.1467
MPI-ESM_GLAC1D	120	72.3616	-14.0936	1575.98	6.4311	-31.4713	6.4311	-33.2656	246.296	37.3289	8.59534	54.0382	109.041	27.7912	109.041	26.8093
MPI-ESM_GLAC1D	123.75	72.3616	-14.1423	1556.82	6.04438	-31.345	6.04438	-33.1562	235.811	34.7252	8.71831	51.2318	100.637	27.7601	100.637	27.0174
MPI-ESM_GLAC1D	127.5	72.3616	-14.3016	1537.49	3.02238	-31.2662	5.54828	-33.1126	233.017	33.4261	9.13891	49.0625	98.6741	28.5651	95.7393	27.9162
MPI-ESM_GLAC1D	131.25	72.3616	-14.6161	1522.7	2.49309	-31.4166	4.99034	-33.1953	233.377	35.1251	9.55034	48.4717	101.425	29.4072	91.6769	29.0425
MPI-ESM_GLAC1D	138.75	72.3616	-14.9256	1477.86	1.63697	-31.2519	3.96235	-32.9173	272.241	43.3237	10.488	54.7031	122.169	32.4949	121.671	33.1042
MPI-ESM_GLAC1D	142.5	72.3616	-14.8306	1452.92	1.4371	-30.9303	3.68305	-32.5221	256.837	42.9351	10.2163	51.4234	114.281	32.8869	109.748	34.1728
MPI-ESM_GLAC1D	146.25	72.3616	-14.6433	1426.14	1.32707	-25.682	3.50662	-32.0143	230.74	38.5147	10.3296	45.6692	99.781	33.1247	88.6136	34.6254
MPI-ESM_GLAC1D	-123.75	72.3616	-9.84931	1417.9	5.33553	-22.1527	7.69932	-27.138	257.076	34.6404	13.5157	29.7393	92.5187	43.2611	90.8	47.2911
MPI-ESM_GLAC1D	-120	72.3616	-10.12	1434.12	5.27694	-22.4847	7.76378	-27.4804	264.546	34.1334	13.9547	30.2305	97.3841	45.2881	90.6696	47.6038
MPI-ESM_GLAC1D	-116.25	72.3616	-10.3879	1434.26	5.05949	-22.7992	7.56977	-27.7141	254.918	32.4861	13.8846	28.972	93.0593	44.7157	83.2731	46.4867
MPI-ESM_GLAC1D	-112.5	72.3616	-10.645	1430.33	4.80624	-23.1696	7.28396	-27.9531	249.171	30.7742	13.5263	28.3715	89.5451	44.1007	78.6043	44.5606
MPI-ESM_GLAC1D	-108.75	72.3616	-10.8573	1424.69	4.55689	-28.2005	6.96235	-28.2005	250.949	32.2199	13.3687	29.9286	89.6146	42.8984	76.266	42.8984
MPI-ESM_GLAC1D	-93.75	72.3616	-11.5152	1436.9	4.05819	-29.3548	6.25597	-29.3548	306.79	41.6367	12.9098	43.158	122.477	40.0376	119.141	40.0376
MPI-ESM_GLAC1D	-86.25	72.3616	-11.3205	1466.26	6.8061	-29.5781	6.8061	-29.5781	351.789	52.348	13.8164	49.2165	150.573	41.8019	150.573	41.8019
MPI-ESM_GLAC1D	-82.5	72.3616	-10.9125	1480.22	7.44412	-29.2369	7.44412	-29.2369	358.595	59.1582	13.79	53.4834	161.936	42.2492	161.936	42.2492
MPI-ESM_GLAC1D	-78.75	72.3616	-10.093	1479.01	8.28526	-28.3658	8.28526	-28.3658	342.959	55.5945	12.9862	51.8083	153.192	41.7685	153.192	41.7685
MPI-ESM_GLAC1D	-75	72.3616	-9.01907	1458.29	9.17198	-26.9798	9.17198	-26.9798	311.588	48.7841	12.1877	47.0606	133.141	41.1654	133.141	41.1654
MPI-ESM_GLAC1D	-56.25	72.3616	-12.3101	1053	1.92524	-23.9752	1.92524	-23.4505	419.624	66.8268	19.3946	47.3974	181.915	60.5819	181.915	63.0215
MPI-ESM_GLAC1D	-52.5	72.3616	-15.9509	849.766	-4.09625	-24.8997	-4.09625	-24.6217	383.674	52.5931	18.6089	39.1014	151.4	58.3791	151.4	60.8804
MPI-ESM_GLAC1D	-48.75	72.3616	-19.0062	827.806	-7.51357	-27.6393	-7.51357	-27.6393	387.637	53.2116	19.1837	37.7342	149.54	58.9442	149.54	58.9442
MPI-ESM_GLAC1D	-45	72.3616	-21.7375	841.92	-12.1274	-30.6302	-10.1601	-30.6302	356.565	44.4945	19.1346	31.628	128.479	58.842	125.321	58.842
MPI-ESM_GLAC1D	-41.25	72.3616	-23.5051	884.576	-13.3754	-33.0533	-11.4406	-33.0533	304.238	36.7884	18.7501	24.482	103.943	58.2152	93.838	58.2152
MPI-ESM_GLAC1D	-37.5	72.3616	-24.3189	908.544	-19.1457	-19.8876	-11.9934	-34.2851	262.503	33.3883	15.382	23.8422	89.1758	50.7945	70.935	58.6314
MPI-ESM_GLAC1D	-33.75	72.3616	-23.7709	908.73	-18.4966	-19.5165	-11.4029	-33.6849	288.518	38.2078	14.4878	28.9246	103.255	50.0714	80.2452	65.8879
MPI-ESM_GLAC1D	-30	72.3616	-21.3519	905.643	-15.729	-17.523	-9.05328	-31.2701	384.249	51.6571	19.4933	31.4915	140.472	66.8359	112.562	85.2185
MPI-ESM_GLAC1D	-26.25	72.3616	-16.9367	997.295	-5.00822	-19.3586	-3.62164	-27.9694	542.095	72.4799	31.0439	33.2995	206.707	96.7322	178.684	112.491
MPI-ESM_GLAC1D	-22.5	72.3616	-13.0589	962.009	-1.18595	-16.0637	-0.469946	-23.733	648.497	81.7579	38.0377	30.7139	240.111	118.955	207.5	138.983
MPI-ESM_GLAC1D	18.75	68.652	0.326794	782.778	10.4643	-9.40686	10.4643	-9.40686	624.017	90.8825	30.2261	40.8968	252.818	93.3556	252.818	93.3556
MPI-ESM_GLAC1D	22.5	68.652	-0.80553	847.97	10.0841	-11.5013	10.0841	-11.5013	568.137	72.5325	26.2581	36.7398	214.275	81.091	214.275	81.091
MPI-ESM_GLAC1D	26.25	68.652	-1.83011	890.626	9.44216	-13.2584	9.44216	-13.2584	526.956	65.1166	24.349	34.9686	191.112	75.1849	191.112	75.1849
MPI-ESM_GLAC1D	30	68.652	-2.45332	887.626	4.56328	-13.914	8.65831	-13.914	496.207	57.6899	24.4295	30.2513	164.404	74.7929	161.994	74.7929
MPI-ESM_GLAC1D	52.5	68.652	-6.96959	1107.03	6.71965	-21.0514	6.98318	-21.0514	435.725	51.0777	23.0296	27.5548	147.949	69.3382	138.847	69.3382
MPI-ESM_GLAC1D	56.25	68.652	-7.85582	1180.95	6.65845	-22.8502	7.15505	-22.8502	456.116	54.1594	23.0453	28.8933	155.688	69.6456	147.13	69.6456
MPI-ESM_GLAC1D	60	68.652	-8.61005	1249.78	6.60376	-24.5071	7.33149	-24.5071	470.455	55.6013	23.0177	30.4147	162.593	69.6408	153.937	69.6408
MPI-ESM_GLAC1D	63.75	68.652	-9.14798	1300.96	6.64803	-25.6237	7.48188	-25.6237	485.713	59.444	22.6967	32.5197	171.279	68.6596	163.584	68.6596
MPI-ESM_GLAC1D	67.5	68.652	-9.47838	1334.02	6.67082	-26.3131	7.57758	-26.3131	490.644	62.1582	21.9091	35.1515	179.441	66.3741	172.787	66.3741
MPI-ESM_GLAC1D	71.25	68.652	-9.57392	1355.58	6.82902	-26.6054	7.81326	-26.6054	476.559	60.9009	21.2897	34.9612	174.513	64.5302	166.769	64.5302
MPI-ESM_GLAC1D	75	68.652	-9.58694	1364.02	6.93514	-26.6295	7.98578	-26.6295	467.096	58.851	21.1598	35.1529	170.962	63.6087	163.443	63.6087
MPI-ESM_GLAC1D	78.75	68.652	-9.72236	1373.8	6.89803	-26.8079	8.05935	-26.8079	458.811	57.7215	20.7629	35.7477	169.581	63.2471	160.019	63.2471
MPI-ESM_GLAC1D	82.5	68.652	-10.0656	1385.72	6.65455	-27.2317	7.96951	-27.2317	466.997	60.4705	20.43	38.6043	176.488	61.9696	170.015	61.9696
MPI-ESM_GLAC1D	86.25	68.652	-10.6621	1410.68	6.24244	-28.0944	7.78201	-28.0944	471.195	64.4298	19.971	41.9306	183.553	60.0683	179.161	60.0683
MPI-ESM_GLAC1D	90	68.652	-11.4191	1443.18	5.73137	-26.9843	7.51964	-29.1972	473.154	67.6663	18.7595	45.204	190.912	60.3927	186.959	56.762
MPI-ESM_GLAC1D	93.75	68.652	-12.2066	1481.08	5.2828	-28.0976	7.30154	-30.4003	466.305	71.8039	17.0375	48.8473	195.1	55.9843	192.215	51.8902
MPI-ESM_GLAC1D	97.5	68.652	-12.9421	1521.75	7.11013	-29.2545	7.11013	-31.6445	455.665	75.0307	15.2107	53.6688	199.025	50.6781	199.025	46.5379
MPI-ESM_GLAC1D	101.25	68.652	-13.4598	1557.26	7.04958	-30.1653	7.04958	-32.58	443.126	78.2458	13.2961	60.1717	208.734	44.4576	208.734	40.5891
MPI-ESM_GLAC1D	105	68.652	-13.6581	1592.8	7.31195	-30.7903	7.31195	-33.222	427.297	79.1811	11.7554	66.3123	214.541	39.0108	214.541	35.6094
MPI-ESM_GLAC1D	108.75	68.652	-13.5685	1624.39	7.80544	-31.1106	7.80544	-33.5488	396.723	72.4339	10.4752	69.0855	204.758	34.2341	204.758	31.4961
MPI-ESM_GLAC1D	112.5	68.652	-13.2779	1651.3	8.42263	-31.1966	8.42263	-33.6699	353.84	61.6587	9.33633	68.0944	181.095	30.7376	181.095	28.5083
MPI-ESM_GLAC1D	116.25	68.652	-12.9532	1672.88	9.01117	-31.1497	9.01117	-33.6432	313.931	54.9195	8.38578	66.3698	158.592	27.8358	158.592	25.8678
MPI-ESM_GLAC1D	120	68.652	-12.7743	1686.38	9.34581	-31.0794	9.34581	-33.6321	288.962	49.1502	8.18127	62.9189	141.311	27.379	141.311	25.4713
MPI-ESM_GLAC1D	123.75	68.652	-12.8622	1689.77	9.27094	-31.0716	9.27094	-33.7382	285.015	46.25	8.55891	59.5142	133.92	28.3098	133.92	26.493
MPI-ESM_GLAC1D	127.5	68.652	-13.2782	1688.64	8.84776	-31.2213	8.84776	-33.9309	292.303	46.8457	9.38649	57.787	133.397	30.0403	133.397	28.6463
MPI-ESM_GLAC1D	131.25	68.652	-13.9733	1679.53	8.01313	-31.6419	8.01313	-34.3053	317.989	55.1739	10.2557	61.9259	150.608	31.822	150.608	30.9783
MPI-ESM_GLAC1D	135	68.652	-14.6296	1664.5	7.15115	-32	7.15115	-34.5559	344.214	63.7607	11.4725	65.6537	168.389	34.4584	168.389	34.445
MPI-ESM_GLAC1D	138.75	68.652	-14.9504	1642.98	6.55414	-32.0403	6.55414	-34.4954	376.376	73.5918	12.3952	67.7863	188.206	38.5938	188.206	39.331
MPI-ESM_GLAC1D	142.5	68.652	-14.9141	1617.26	6.2436	-31.7636	6.2436	-34.0852	412.552	82.3361	14.022	67.3256	205.903	44.507	205.903	45.6537
MPI-ESM_GLAC1D	146.25	68.652	-14.4833	1586.33	3.55559	-31.0924	6.29438	-33.2369	426.629	82.4337	15.6269	63.4897	207.117	49.8347	206.501	51.103
MPI-ESM_GLAC1D	150	68.652	-13.8358	1554.48	6.56261	-30.2154	6.56261	-32.2434	413.005	76.4788	15.9542	58.7248	192.973	51.8698	192.973	53.8805
MPI-ESM_GLAC1D	153.75	68.652	-13.2025	1521.21	4.28345	-29.3216	6.80935	-31.2903	375.888	65.9919	15.1804	53.728	168.991	50.2618	168.094	52.8569
MPI-ESM_GLAC1D	157.5	68.652	-12.8228	1486.34	4.35376	-28.6139	6.78656	-30.5227	337.5	56.8266	14.0115	49.3693	147.239	46.9759	143.889	49.9587
MPI-ESM_GLAC1D	161.25	68.652	-12.8218	1450.42	4.05038	-23.3675	6.36078	-30.0898	321.589	51.7082	13.5814	47.3198	138.831	45.6394	133.376	48.7778
MPI-ESM_GLAC1D	165	68.652	-13.1376	1416.45	3.47551	-28.2395	5.60037	-30.0214	331.393	52.1969	14.2324	45.5476	141.523	47.8838	133.616	50.9702
MPI-ESM_GLAC1D	168.75	68.652	-13.5949	1373.64	2.66561	-28.3619	4.48253	-30.0312	373.535	57.285	16.2829	43.9324	157.114	54.541	147.83	57.8043
MPI-ESM_GLAC1D	172.5	68.652	-13.8824	1330.13	1.97616	-28.4016	3.43044	-29.9505	421.931	63.0045	19.5088	39.4821	170.532	64.6586	157.509	67.9448
MPI-ESM_GLAC1D	176.25	68.652	-13.7803	1286.07	1.57968	-28.1673	2.67784	-29.5742	459.774	65.9289	22.7547	34.5307	176.398	74.712	159.623	78.1116
MPI-ESM_GLAC1D	180	68.652	-13.1704	1243.96	1.57837	-23.4567	2.42263	-27.4915	452.436	59.7933	24.2546	28.8806	160.782	78.6571	140.141	78.8157
MPI-ESM_GLAC1D	-161.25	68.652	-8.43688	1235.01	4.35767	-19.2549	6.31391	-23.7063	351.559	51.1568	17.1541	35.2048	133.196	54.3152	127.775	59.8467
MPI-ESM_GLAC1D	-157.5	68.652	-8.26272	1252.78	6.84255	-18.9385	6.84255	-23.6152	388.559	56.9481	18.2367	41.1528	156.158	56.5803	156.158	61.2783
MPI-ESM_GLAC1D	-153.75	68.652	-8.22089	1268.3	7.21169	-18.7367	7.21169	-23.5944	461.541	73.2872	19.3452	53.1081	212.249	60.8068	212.249	63.14
MPI-ESM_GLAC1D	-150	68.652	-8.16783	1272.55	7.40245	-18.5166	7.40245	-23.4824	485.883	83.9157	19.3315	59.2376	236.485	61.4038	236.485	63.0502
MPI-ESM_GLAC1D	-146.25	68.652	-8.03828	1271.99	7.55675	-18.2614	7.55675	-23.2792	467.159	80.6675	18.9408	59.053	227.041	59.4505	227.041	61.955
MPI-ESM_GLAC1D	-142.5	68.652	-7.80358	1285.2	7.97081	-18.0355	7.97081	-24.996	480.34	85.9792	18.5745	62.8574	240.787	58.3472	240.787	63.454
MPI-ESM_GLAC1D	-138.75	68.652	-7.49466	1313.97	8.67328	-17.8728	8.67328	-24.9987	539.968	105.829	18.7633	71.1808	287.58	59.817	287.58	62.6436
MPI-ESM_GLAC1D	-135	68.652	-7.14847	1340.99	9.37315	-22.9225	9.37315	-25.0013	543.822	103.352	18.7301	69.8539	285.264	59.3812	285.264	61.8009
MPI-ESM_GLAC1D	-131.25	68.652	-6.6024	1343.05	9.97992	-22.2819	9.97992	-24.5963	542.35	95.9284	19.9169	61.3266	263.607	62.5236	263.607	62.8404
MPI-ESM_GLAC1D	-127.5	68.652	-6.4608	1369.33	10.4584	-22.3359	10.4584	-24.8645	531.588	87.8832	20.4292	53.6704	240.067	65.7151	240.067	65.1971
MPI-ESM_GLAC1D	-123.75	68.652	-6.522	1395.27	10.7521	-22.61	10.7521	-25.3261	520.561	79.2573	21.6689	46.9173	220.225	69.9485	220.225	69.3977
MPI-ESM_GLAC1D	-120	68.652	-6.76582	1415.3	10.7924	-23.0553	10.7924	-25.8743	505.558	70.8066	22.936	39.904	198.009	73.4343	198.009	72.7658
MPI-ESM_GLAC1D	-116.25	68.652	-7.12291	1433.34	10.6837	-23.6516	10.6837	-26.4908	493.519	63.5876	23.2966	35.4458	181.879	74.5005	181.879	73.2088
MPI-ESM_GLAC1D	-112.5	68.652	-7.49368	1448.45	7.9677	-24.2786	10.5027	-27.0579	471.06	59.8046	22.7254	33.6117	169.079	72.1013	167.422	70.1542
MPI-ESM_GLAC1D	-108.75	68.652	-7.7847	1458.11	7.83814	-24.8242	10.3087	-27.4648	434.911	54.8722	20.3563	33.4498	155.896	65.637	151.158	64.0606
MPI-ESM_GLAC1D	-105	68.652	-7.99222	1464.44	7.75025	-25.3059	10.1544	-27.7213	386.264	47.5115	17.3837	33.2762	137.499	57.2986	129.601	56.4623
MPI-ESM_GLAC1D	-97.5	68.652	-8.44241	1462.8	7.34335	-26.1738	9.64464	-28.0514	348.959	46.6727	13.8592	38.9302	130.996	46.4749	129.36	46.6758
MPI-ESM_GLAC1D	-93.75	68.652	-8.9302	1462.51	9.12315	-26.8404	9.12315	-26.8404	349.545	48.6656	13.5987	42.0461	136.867	45.3806	136.867	45.3806
MPI-ESM_GLAC1D	-90	68.652	-9.42744	1449.54	6.20468	-27.3463	8.48318	-27.3463	369.043	52.8292	14.2417	42.3182	145.88	47.4267	144.522	47.4267
MPI-ESM_GLAC1D	-82.5	68.652	-10.0547	1433.19	7.69672	-27.9303	7.69672	-27.9303	434.041	66.5889	18.2655	46.1113	181.801	58.1977	181.801	58.1977
MPI-ESM_GLAC1D	-75	68.652	-8.44648	1420.2	9.088	-26.0957	9.088	-26.0957	448.856	72.364	19.1487	50.8133	199.775	59.9477	199.775	59.9477
MPI-ESM_GLAC1D	-71.25	68.652	-6.63414	1375.14	10.3009	-25.039	10.3009	-23.6686	374.23	57.5507	15.7468	48.2929	161.665	48.3283	161.665	51.1015
MPI-ESM_GLAC1D	-67.5	68.652	-4.19892	1261.73	11.4187	-20.9934	11.4187	-19.8001	293.038	41.5057	13.1212	41.762	118.857	40.6119	118.857	43.1054
MPI-ESM_GLAC1D	-52.5	68.652	-9.70332	914.91	2.41222	-20.1875	2.41222	-20.1875	522.607	80.0452	23.1936	43.997	218.951	82.2769	218.951	82.2769
MPI-ESM_GLAC1D	-48.75	68.652	-13.5951	749.217	-3.30849	-21.7311	-3.30849	-21.7311	515.92	65.5658	29.4926	27.6843	180	97.0393	180	97.0393
MPI-ESM_GLAC1D	-45	68.652	-16.0993	751.764	-7.2823	-24.2285	-5.81565	-24.2285	592.201	68.2037	37.509	22.2893	197.372	119.947	187.813	119.947
MPI-ESM_GLAC1D	-41.25	68.652	-17.5196	776.337	-12.7531	-19.27	-6.99469	-25.9824	658.447	78.675	40.3996	18.8965	208.265	139.473	178.315	150.478
MPI-ESM_GLAC1D	-37.5	68.652	-17.5187	803.263	-12.3618	-14.1271	-6.68349	-26.3138	736.783	92.4085	42.0428	22.2775	243.415	141.154	176.791	182.966
MPI-ESM_GLAC1D	-33.75	68.652	-15.1418	788.274	-9.67435	-7.18748	-4.58713	-23.8216	872.294	109.293	48.5004	24.9054	292.91	156.105	192.665	225.305
MPI-ESM_GLAC1D	15	64.9419	1.24346	803.5	11.4754	-8.88798	11.4754	-8.88798	820.905	113.139	47.2084	30.6766	300.434	145.856	300.434	145.856
MPI-ESM_GLAC1D	18.75	64.9419	-0.0247686	890.792	11.3868	-11.3027	11.3868	-11.3027	845.604	111.832	46.5048	29.2735	303.163	143.761	303.163	143.761
MPI-ESM_GLAC1D	22.5	64.9419	-0.931995	951.85	11.2722	-13.0983	11.2722	-13.0983	856.541	110.158	44.7196	30.4746	309.07	135.434	309.07	135.434
MPI-ESM_GLAC1D	26.25	64.9419	-1.49466	992.388	11.198	-14.33	11.198	-14.33	842.039	106.055	41.9464	30.9943	302.272	126.027	302.272	126.027
MPI-ESM_GLAC1D	30	64.9419	-1.82099	1012.48	11.0932	-15.0664	11.0932	-15.0664	815.864	101.153	38.9523	31.4912	291.359	117.456	291.359	117.456
MPI-ESM_GLAC1D	33.75	64.9419	-2.04072	1021.21	10.9923	-15.498	10.9923	-15.498	785.295	95.2521	37.4233	30.5643	271.944	112.901	271.944	112.901
MPI-ESM_GLAC1D	41.25	64.9419	-2.67386	1047.97	10.7963	-16.4531	10.7963	-16.4531	776.371	104.388	34.9621	36.2548	288.075	105.413	288.075	105.413
MPI-ESM_GLAC1D	45	64.9419	-3.22952	1081.28	9.75481	-17.3138	10.7781	-17.3138	685.722	86.6865	32.2676	32.6074	246.66	98.2047	237.438	98.2047
MPI-ESM_GLAC1D	48.75	64.9419	-3.85875	1117.4	9.63046	-18.2884	10.6915	-18.2884	672.885	80.7284	31.0992	31.2527	235.895	95.1347	222.676	95.1347
MPI-ESM_GLAC1D	52.5	64.9419	-4.57588	1151.22	9.33814	-19.3717	10.4376	-19.3717	660.166	76.5903	29.6248	31.2671	228.313	90.7777	214.971	90.7777
MPI-ESM_GLAC1D	56.25	64.9419	-5.29544	1183.94	8.97225	-20.485	10.1375	-20.485	647.261	77.8854	27.47	32.9838	226.706	84.7686	215.355	84.7686
MPI-ESM_GLAC1D	60	64.9419	-6.00166	1208.04	8.51848	-21.5651	9.64594	-21.5651	646.753	84.5239	25.2623	37.2229	236.686	78.7556	230.64	78.7556
MPI-ESM_GLAC1D	63.75	64.9419	-6.50686	1233.9	8.30949	-22.4446	9.41547	-22.4446	640.307	86.2926	24.146	39.8215	240.369	75.1759	237.084	75.1759
MPI-ESM_GLAC1D	67.5	64.9419	-6.80862	1259.24	8.35962	-23.0572	9.41287	-23.0572	623.221	84.3244	23.2132	39.6402	233.637	72.4333	230.272	72.4333
MPI-ESM_GLAC1D	71.25	64.9419	-6.92532	1285.13	8.64152	-23.4303	9.66482	-23.4303	593.984	77.2772	23.0777	35.9444	213.321	71.9222	208.925	71.9222
MPI-ESM_GLAC1D	75	64.9419	-7.12682	1296.3	8.64413	-23.6972	9.6212	-23.6972	592.165	72.3758	23.8294	33.9135	208.22	73.6871	202.219	73.6871
MPI-ESM_GLAC1D	78.75	64.9419	-7.47317	1307.77	8.46314	-24.1217	9.45258	-24.1217	605.427	74.124	24.6445	33.6954	213.653	76.2754	206.039	76.2754
MPI-ESM_GLAC1D	82.5	64.9419	-8.03942	1325.53	8.07577	-24.8776	9.15961	-24.8776	623.163	81.5561	24.7088	36.7963	230.95	76.6884	220.649	76.6884
MPI-ESM_GLAC1D	86.25	64.9419	-8.80797	1352.72	7.53085	-25.9589	8.75857	-25.9589	628.125	87.0585	23.5585	41.6844	245.493	73.7937	239.825	73.7937
MPI-ESM_GLAC1D	90	64.9419	-9.65872	1388.23	8.37771	-27.2526	8.37771	-27.2526	602.415	87.303	21.5932	45.3285	242.981	67.8689	242.981	67.8689
MPI-ESM_GLAC1D	93.75	64.9419	-10.4585	1430.01	8.1225	-28.5683	8.1225	-28.5683	564.47	86.2951	19.1674	49.948	241.95	60.098	241.95	60.098
MPI-ESM_GLAC1D	97.5	64.9419	-11.1301	1464.41	7.87445	-29.6875	7.87445	-29.6875	516.634	80.626	16.6413	52.7569	227.966	51.8559	227.966	51.8559
MPI-ESM_GLAC1D	101.25	64.9419	-11.5975	1493.45	7.80349	-27.483	7.80349	-30.4655	464.166	72.9519	13.9778	55.1717	209.292	49.2654	209.292	43.5508
MPI-ESM_GLAC1D	105	64.9419	-11.8366	1522.42	7.97211	-28.0976	7.97211	-31.041	427.865	69.4362	11.8457	58.9533	199.651	41.6226	199.651	36.845
MPI-ESM_GLAC1D	108.75	64.9419	-11.8459	1553.69	8.41873	-28.4863	8.41873	-31.4049	395.949	66.6244	10.3483	63.3455	192.994	35.8757	192.994	32.0584
MPI-ESM_GLAC1D	112.5	64.9419	-11.6581	1583.01	9.06651	-28.6386	9.06651	-31.5358	376.726	65.0362	9.69492	65.9239	188.679	32.8064	188.679	29.5832
MPI-ESM_GLAC1D	116.25	64.9419	-11.4922	1625.72	9.80414	-28.9609	9.80414	-31.9088	368.847	65.6728	9.25866	68.3898	188.941	30.9948	188.941	28.3212
MPI-ESM_GLAC1D	120	64.9419	-11.4007	1650.08	10.2182	-28.9654	10.2182	-32.0293	375.554	65.4811	9.16935	67.0489	189.273	31.5199	189.273	28.23
MPI-ESM_GLAC1D	123.75	64.9419	-11.8563	1686.55	10.142	-29.6204	10.142	-32.8802	384.016	69.215	9.39332	68.0399	194.539	31.8684	194.539	28.601
MPI-ESM_GLAC1D	127.5	64.9419	-12.7095	1711.97	9.49164	-30.47	9.49164	-33.8457	391.213	71.5034	9.43862	70.0229	200.68	31.3663	200.68	28.5263
MPI-ESM_GLAC1D	131.25	64.9419	-13.7388	1706.47	8.33474	-34.4856	8.33474	-34.4856	396.451	73.5783	9.32784	73.1146	208.233	28.2146	208.233	28.2146
MPI-ESM_GLAC1D	135	64.9419	-14.6319	1679.4	7.07628	-31.6458	7.07628	-34.7923	411.545	83.3882	9.55743	77.7785	224.171	30.8381	224.171	29.5843
MPI-ESM_GLAC1D	138.75	64.9419	-15.0279	1632.09	6.0906	-31.5013	6.0906	-34.4062	439.274	89.7039	12.1506	75.5817	234.305	37.7957	234.305	37.5713
MPI-ESM_GLAC1D	142.5	64.9419	-14.9253	1582.87	5.57628	-30.8938	5.57628	-33.5397	494.757	96.298	17.142	68.2261	248.233	52.2416	248.233	52.783
MPI-ESM_GLAC1D	146.25	64.9419	-14.3308	1544.11	3.62981	-29.9843	5.70779	-32.4322	548.732	102.005	22.3382	61.0924	264.043	68.1291	257.12	69.1456
MPI-ESM_GLAC1D	150	64.9419	-13.4782	1518.02	4.36027	-28.9531	6.28982	-31.2825	555.563	95.6595	25.1246	54.5441	254.756	76.9819	245.697	78.4092
MPI-ESM_GLAC1D	153.75	64.9419	-12.6057	1504.03	5.15389	-27.9856	7.10753	-30.2721	502.372	83.7234	24.8964	48.1719	220.263	77.1406	206.535	79.4776
MPI-ESM_GLAC1D	157.5	64.9419	-11.9862	1497.8	5.76587	-22.1332	7.81586	-29.5599	444.859	72.456	23.31	43.1899	186.941	71.274	171.17	76.1905
MPI-ESM_GLAC1D	161.25	64.9419	-11.8174	1484.4	5.8746	-22.0212	7.91482	-29.2259	428.463	67.7701	22.4404	41.4759	177.146	68.9039	161.168	75.1209
MPI-ESM_GLAC1D	165	64.9419	-11.9626	1460.34	5.57707	-22.2191	7.4656	-29.166	459.525	71.3969	23.5617	40.4883	187.834	74.6375	171.589	81.7606
MPI-ESM_GLAC1D	168.75	64.9419	-12.1825	1418.34	4.99699	-22.4405	6.57107	-29.1113	525.661	77.5425	26.9191	37.4596	208.432	87.3792	192.088	95.5865
MPI-ESM_GLAC1D	172.5	64.9419	-12.1581	1360.11	4.46444	-22.404	5.60232	-28.6914	602.891	84.0118	31.6326	32.4308	226.896	103.921	208.686	114.128
MPI-ESM_GLAC1D	176.25	64.9419	-11.6992	1288.16	4.1285	-21.8532	4.80414	-27.7063	656.08	85.1642	35.7187	26.4527	228.928	117.731	211.819	129.492
MPI-ESM_GLAC1D	180	64.9419	-10.6677	1213.78	4.13697	-20.7595	4.4988	-24.7936	656.353	77.9496	36.99	22.6178	216.726	120.896	198.157	123.879
MPI-ESM_GLAC1D	-176.25	64.9419	-9.27916	1152.22	4.48723	-19.3441	4.73839	-23.1816	571.637	65.0115	34.4064	21.3189	183.112	108.752	161.001	112.896
MPI-ESM_GLAC1D	-172.5	64.9419	-7.7484	1113.73	1.22799	-3.40773	5.50987	-21.5592	470.295	55.0433	26.699	25.8706	154.548	84.9364	127.327	95.0746
MPI-ESM_GLAC1D	-161.25	64.9419	-6.10615	1178.91	6.30494	-15.6651	8.22862	-20.3925	590.375	88.7195	25.1348	41.6391	234.165	80.0605	225.101	90.0478
MPI-ESM_GLAC1D	-157.5	64.9419	-6.49352	1207.76	6.17343	-15.6683	8.47732	-22.7513	687.353	104.237	27.8646	44.9446	282.353	90.8984	270.293	112.642
MPI-ESM_GLAC1D	-153.75	64.9419	-6.93476	1212.72	5.86418	-15.6605	8.32953	-23.1614	757.621	111.635	30.9323	44.7304	307.451	102.385	300.224	123.892
MPI-ESM_GLAC1D	-150	64.9419	-7.23343	1197.07	5.52043	-8.57472	7.97472	-23.1835	776.941	111.133	32.8524	43.7516	311.143	107.644	306.583	128.91
MPI-ESM_GLAC1D	-146.25	64.9419	-7.36331	1172.03	7.56716	-8.68866	7.56716	-22.9524	752.098	106.671	32.4024	43.89	301.305	106.722	301.305	123.22
MPI-ESM_GLAC1D	-142.5	64.9419	-7.36461	1154.7	7.3074	-15.4079	7.3074	-22.7115	688.589	99.3155	29.5015	45.8404	287.826	96.5699	287.826	108.863
MPI-ESM_GLAC1D	-138.75	64.9419	-7.29218	1159.28	7.34711	-15.4255	7.34711	-22.6946	612.754	97.4365	25.0948	52.105	276.953	80.8928	276.953	91.7342
MPI-ESM_GLAC1D	-135	64.9419	-7.08108	1190.48	7.83995	-15.4613	7.83995	-22.8632	619.889	121.44	22.3232	69.3622	323.067	71.4466	323.067	77.9006
MPI-ESM_GLAC1D	-131.25	64.9419	-6.69925	1228.16	8.54763	-20.5078	8.54763	-23.0065	614.804	130.392	20.7526	76.7824	335.22	66.5486	335.22	69.5618
MPI-ESM_GLAC1D	-127.5	64.9419	-6.11657	1259.27	9.38813	-20.2552	9.38813	-22.9062	645.044	134.291	20.9724	78.3299	354.35	65.2255	354.35	67.1078
MPI-ESM_GLAC1D	-123.75	64.9419	-5.10957	1261.17	10.2722	-22.0983	10.2722	-22.0983	684.227	132.18	23.1023	71.0045	357.683	71.7243	357.683	71.7243
MPI-ESM_GLAC1D	-120	64.9419	-4.50296	1297.92	11.2143	-22.0872	11.2143	-22.0872	680.967	125.952	25.4864	63.4567	338.375	78.7429	338.375	78.7429
MPI-ESM_GLAC1D	-116.25	64.9419	-4.52705	1323.92	11.409	-22.6302	11.409	-22.6302	719.215	122.703	27.3398	57.8876	337.989	84.6805	337.989	84.6805
MPI-ESM_GLAC1D	-112.5	64.9419	-4.82197	1369.37	11.6375	-23.625	11.6375	-23.625	695.491	107.453	28.9663	48.898	301.191	88.7665	301.191	88.7665
MPI-ESM_GLAC1D	-108.75	64.9419	-5.29967	1414.91	11.7429	-24.761	11.7429	-24.761	637.73	87.8618	29.0768	40.5258	252.745	87.4108	252.745	87.4108
MPI-ESM_GLAC1D	-105	64.9419	-5.69013	1445.2	11.7918	-25.5794	11.7918	-25.5794	573.754	77.3813	26.5334	37.6195	216.989	79.8644	216.989	79.8644
MPI-ESM_GLAC1D	-101.25	64.9419	-5.7554	1446.82	11.823	-25.6477	11.823	-25.6477	507.295	67.5547	22.3804	38.1105	188.98	67.603	188.98	67.603
MPI-ESM_GLAC1D	-97.5	64.9419	-5.54674	1417.02	11.7273	-24.9628	11.7273	-24.9628	453.71	61.5344	17.7265	42.3863	178.591	54.895	178.591	54.895
MPI-ESM_GLAC1D	-93.75	64.9419	-5.27005	1364.7	11.3992	-21.9316	11.3992	-21.9316	407.694	59.5365	14.2658	44.8866	167.172	50.6995	167.172	50.6995
MPI-ESM_GLAC1D	-90	64.9419	-5.87389	1352.48	10.5535	-22.7773	10.5535	-22.7773	368.971	60.6313	12.129	53.8883	167.05	42.2517	167.05	42.2517
MPI-ESM_GLAC1D	-86.25	64.9419	-6.72578	1319.07	9.24164	-23.4173	9.24164	-23.4173	366.922	57.6474	13.6061	48.3534	158.587	46.5046	158.587	46.5046
MPI-ESM_GLAC1D	-71.25	64.9419	-6.50019	1251.52	8.58865	-23.263	8.58865	-22.3404	455.84	74.0963	20.384	47.8868	195.038	62.9208	195.038	64.3335
MPI-ESM_GLAC1D	-67.5	64.9419	-4.29186	1160.25	9.588	-19.8164	9.588	-19.0813	405.254	65.5741	18.3112	48.8455	175.016	55.2233	175.016	56.1009
MPI-ESM_GLAC1D	-48.75	64.9419	-7.43411	552.519	-0.884517	-13.7155	-0.253149	-13.7155	780.896	104.602	40.1278	31.9432	282.007	143.12	277.881	143.12
MPI-ESM_GLAC1D	-45	64.9419	-8.411	561.054	-1.72436	-14.7526	-0.992082	-14.7526	1097.94	129.616	68.8609	23.3998	369.503	219.123	345.983	219.123
MPI-ESM_GLAC1D	-41.25	64.9419	-8.19681	562.132	-4.16459	-9.72902	-0.788306	-14.5481	1379.86	159.927	92.5916	15.1853	414.202	299.675	359.242	327.172
MPI-ESM_GLAC1D	-18.75	64.9419	6.28903	447.274	9.95846	2.51461	12.0294	1.29757	528.752	53.6812	38.4942	10.2585	153.591	120.78	137.53	127.793
MPI-ESM_GLAC1D	7.5	61.2316	5.61358	535.152	12.2703	4.28986	12.2703	-1.17899	987.081	110.975	58.4895	20.0059	310.394	192.195	310.394	213.54
MPI-ESM_GLAC1D	11.25	61.2316	4.05938	619.32	11.1389	-1.00101	11.7566	-3.92834	1036.36	118.811	61.9066	20.8654	328.212	203.692	324.707	218.393
MPI-ESM_GLAC1D	15	61.2316	2.7114	710.595	10.6904	-3.07588	11.5457	-6.48498	1094.71	132.009	69.8027	22.2064	354.04	218.831	351.942	215.518
MPI-ESM_GLAC1D	22.5	61.2316	1.36944	881.616	12.3745	-10.1119	12.3745	-10.1119	1034.05	142.601	57.9251	29.7729	370.547	175.424	370.547	175.424
MPI-ESM_GLAC1D	26.25	61.2316	1.10869	948.562	12.9194	-11.3131	12.9194	-11.3131	986.548	139.969	50.7883	34.0772	370.942	152.892	370.942	152.892
MPI-ESM_GLAC1D	30	61.2316	0.835257	997.251	13.2455	-12.2968	13.2455	-12.2968	917.858	130.017	45.1945	35.9731	351.637	136.357	351.637	136.357
MPI-ESM_GLAC1D	33.75	61.2316	0.383272	1027.96	13.2202	-13.1907	13.2202	-13.1907	885.619	121.274	42.5373	35.209	333.088	129.167	333.088	129.167
MPI-ESM_GLAC1D	37.5	61.2316	-0.221709	1059.07	13.1114	-14.1894	13.1114	-14.1894	871.447	119.862	41.0429	35.5394	324.592	124.607	324.592	124.607
MPI-ESM_GLAC1D	41.25	61.2316	-0.839384	1084.96	12.9311	-15.0957	12.9311	-15.0957	894.983	122.299	40.9789	35.3676	330.954	125.188	330.954	125.188
MPI-ESM_GLAC1D	45	61.2316	-1.44095	1104.15	12.7032	-15.8515	12.7032	-15.8515	809.046	95.5844	39.6591	27.7591	270.117	122.75	270.117	122.75
MPI-ESM_GLAC1D	48.75	61.2316	-1.9971	1113.17	12.3321	-16.483	12.3321	-16.483	833.707	94.8031	38.596	28.4052	274.995	121.413	274.995	121.413
MPI-ESM_GLAC1D	52.5	61.2316	-2.51272	1115.99	11.9122	-17.0052	11.9122	-17.0052	816.479	91.9919	36.8646	28.2843	266.247	116.349	266.247	116.349
MPI-ESM_GLAC1D	56.25	61.2316	-3.10501	1105.52	11.1876	-17.4843	11.1876	-17.4843	805.012	93.7792	34.8168	31.0481	272.698	109.296	272.698	109.296
MPI-ESM_GLAC1D	60	61.2316	-3.66263	1102.03	10.5841	-18.0559	10.5841	-18.0559	808.323	107.011	32.9246	36.8818	296.609	102.24	296.609	102.24
MPI-ESM_GLAC1D	63.75	61.2316	-4.05374	1121	10.4519	-18.7037	10.4519	-18.7037	795.54	115.686	31.5322	40.3165	306.228	97.3833	306.228	97.3833
MPI-ESM_GLAC1D	67.5	61.2316	-4.2165	1159.75	10.8204	-19.3216	10.8204	-19.3216	755.884	113.624	30.1885	39.7666	290.988	94.3187	290.988	94.3187
MPI-ESM_GLAC1D	71.25	61.2316	-4.41149	1187.41	10.9721	-19.8678	10.9721	-19.8678	727.446	107.655	29.191	38.1814	273.785	92.0302	273.785	92.0302
MPI-ESM_GLAC1D	75	61.2316	-4.50084	1219.9	11.351	-20.2877	11.351	-20.2877	674.218	90.5895	28.3179	32.0695	234.962	90.1538	234.962	90.1538
MPI-ESM_GLAC1D	78.75	61.2316	-4.77428	1236.47	11.3269	-20.7005	11.3269	-20.7005	655.601	79.6232	28.8896	27.4431	212.393	91.6287	212.393	91.6287
MPI-ESM_GLAC1D	82.5	61.2316	-5.2554	1250.05	11.06	-21.289	11.06	-21.289	679.637	78.7142	29.8599	26.977	219.185	94.8889	219.185	94.8889
MPI-ESM_GLAC1D	86.25	61.2316	-5.90465	1264.89	10.603	-22.1237	10.603	-22.1237	722.105	88.0991	29.309	31.5869	249.37	93.547	249.37	93.547
MPI-ESM_GLAC1D	90	61.2316	-6.53177	1290.98	10.269	-23.1471	10.269	-23.1471	708.143	97.9773	25.6309	38.5741	268.258	82.3781	268.258	82.3781
MPI-ESM_GLAC1D	93.75	61.2316	-7.04023	1319.71	10.0769	-24.095	10.0769	-24.095	660.487	103.681	20.4913	48.0432	278.147	66.0547	278.147	66.0547
MPI-ESM_GLAC1D	97.5	61.2316	-7.40905	1346.71	10.034	-24.8203	10.034	-24.8203	590.816	96.9646	15.9231	54.4905	265.993	51.6771	265.993	51.6771
MPI-ESM_GLAC1D	101.25	61.2316	-7.84964	1370.95	9.92849	-25.5364	9.92849	-25.5364	530.869	86.9705	13.4685	56.4004	242.373	43.5628	242.373	43.5628
MPI-ESM_GLAC1D	105	61.2316	-8.50214	1400.32	9.73057	-26.4615	9.73057	-26.4615	492.095	78.0589	12.9257	54.618	218.986	41.0169	218.986	41.0169
MPI-ESM_GLAC1D	108.75	61.2316	-9.32425	1439.67	9.50401	-27.6953	9.50401	-27.6953	481.386	76.1331	13.2886	54.6404	213.354	41.3454	213.354	41.3454
MPI-ESM_GLAC1D	112.5	61.2316	-10.0962	1485.77	9.39464	-28.9147	9.39464	-28.9147	495.123	81.1642	13.4507	58.5935	228.924	41.3981	228.924	41.3981
MPI-ESM_GLAC1D	116.25	61.2316	-10.66	1537.89	9.51508	-30.0533	9.51508	-30.0533	512.982	88.472	13.4221	63.1609	248.25	41.3665	248.25	41.3665
MPI-ESM_GLAC1D	120	61.2316	-11.0972	1595.27	9.74945	-31.1484	9.74945	-31.1484	511.719	93.8507	12.684	68.839	259.956	38.861	259.956	38.861
MPI-ESM_GLAC1D	123.75	61.2316	-11.4688	1633.73	9.71625	-31.9479	9.71625	-31.9479	497.078	92.2432	11.4881	72.3873	259.114	35.0498	259.114	35.0498
MPI-ESM_GLAC1D	127.5	61.2316	-11.9462	1646.85	9.1863	-32.496	9.1863	-32.496	473.072	89.48	10.2858	75.1056	250.406	31.0738	250.406	31.0738
MPI-ESM_GLAC1D	131.25	61.2316	-12.4147	1610.43	8.11729	-32.3177	8.11729	-32.3177	463.999	91.6767	9.70352	78.2512	249.357	29.5309	249.357	29.5309
MPI-ESM_GLAC1D	135	61.2316	-12.6774	1535.94	6.83083	-31.4602	6.83083	-31.4602	493.321	99.8046	10.4684	82.1195	274.001	32.2933	274.001	32.2933
MPI-ESM_GLAC1D	138.75	61.2316	-12.4564	1436.63	5.7488	-29.8199	5.7488	-29.9518	539.366	109.474	13.2792	79.6931	292.817	43.7981	292.817	42.6764
MPI-ESM_GLAC1D	142.5	61.2316	-11.7925	1341.55	4.18189	-27.7802	5.14594	-28.1373	617.001	123.39	17.3734	74.4523	321.876	59.9346	320.731	59.2746
MPI-ESM_GLAC1D	146.25	61.2316	-10.9151	1281.06	4.55428	-26.0601	5.22732	-26.5273	644.117	121.29	22.0522	66.7059	323.648	76.0476	311.654	75.8468
MPI-ESM_GLAC1D	150	61.2316	-10.1201	1254.05	5.1285	-25.317	5.73708	-25.317	642.241	111.387	29.2281	55.9727	303.394	91.4013	276.841	91.4013
MPI-ESM_GLAC1D	157.5	61.2316	-9.43085	1249.78	5.95337	-18.3422	6.68826	-24.1835	588.626	96.8863	30.9065	46.1177	257.435	100.282	226.675	102.281
MPI-ESM_GLAC1D	161.25	61.2316	-9.1649	1226.81	6.03736	-11.8553	6.75922	-23.5963	617.385	93.5328	33.4959	38.7836	250.665	109.462	218.363	115.219
MPI-ESM_GLAC1D	165	61.2316	-9.01468	1196.53	5.96835	-11.8768	6.51964	-23.1282	662.724	94.7824	37.3572	34.6254	257.437	119.129	227.034	129.521
MPI-ESM_GLAC1D	168.75	61.2316	-8.65156	1153.52	5.86939	-17.8194	6.27224	-22.4407	745.073	103.538	43.5623	34.0153	286.59	134.721	262.863	141.132
MPI-ESM_GLAC1D	172.5	61.2316	-8.08222	1084.94	5.61678	-17.2517	5.74425	-20.4218	781.121	99.7164	46.1798	26.7444	275.307	146.002	247.389	149.669
MPI-ESM_GLAC1D	-161.25	61.2316	-3.68932	959.864	6.89478	-11.8995	7.77289	-15.5657	854.801	110.393	40.3286	31.959	302.887	132.583	274.331	143.082
MPI-ESM_GLAC1D	-157.5	61.2316	-4.14196	1014.38	3.15507	-12.1149	8.31586	-17.763	1021.52	131.968	48.7654	31.3306	359.348	161.752	314.248	196.308
MPI-ESM_GLAC1D	-153.75	61.2316	-4.34443	1026.7	2.91744	-6.3117	8.55935	-17.9238	1221.4	156.265	60.848	30.7675	429.838	200.2	367.098	239.012
MPI-ESM_GLAC1D	-150	61.2316	-4.33597	994.804	2.78007	-6.34686	8.31326	-17.3483	1315.85	167.309	70.5699	29.3705	459.592	220.961	357.813	273.593
MPI-ESM_GLAC1D	-146.25	61.2316	-4.38105	947.369	2.55481	-6.39178	7.65505	-16.7688	1392.51	176.138	76.0128	30.3287	486.545	228.884	372.688	290.287
MPI-ESM_GLAC1D	-142.5	61.2316	-4.69046	917.626	2.08281	-6.65871	6.91742	-16.8138	1393.03	176.887	69.2448	31.3644	487.224	222.771	380.073	288.333
MPI-ESM_GLAC1D	-138.75	61.2316	-5.33108	925.787	1.33671	-7.20688	6.38878	-17.6321	1295.17	161.799	58.4358	31.2208	445.82	200.144	377.905	265.649
MPI-ESM_GLAC1D	-135	61.2316	-5.94388	969.673	4.83684	-7.6828	6.38748	-18.8658	1103.74	131.065	49.4974	30.9272	371.277	170.225	352.05	220.656
MPI-ESM_GLAC1D	-131.25	61.2316	-6.1208	1032.23	6.96169	-13.3669	6.96169	-19.8951	860.526	111.649	45.4459	32.2371	306.439	142.385	306.439	163.114
MPI-ESM_GLAC1D	-127.5	61.2316	-5.66539	1093.92	7.95063	-13.2699	7.95063	-20.2467	666.101	116.482	30.5247	50.7483	290.685	96.5741	290.685	103.94
MPI-ESM_GLAC1D	-123.75	61.2316	-4.51777	1135.29	7.8913	-17.3151	9.29177	-19.7259	633.908	131.861	22.8428	73.9582	334.306	69.9953	326.121	71.3426
MPI-ESM_GLAC1D	-120	61.2316	-2.5902	1118.58	9.58596	-17.4813	10.7729	-17.7942	692.065	145.689	21.6621	78.2081	374.044	67.2571	367.592	68.5504
MPI-ESM_GLAC1D	-116.25	61.2316	-1.64147	1151.83	11.9324	-17.4479	11.9324	-17.4479	716.661	142.832	23.2666	74.66	374.449	72.6834	374.449	72.6834
MPI-ESM_GLAC1D	-112.5	61.2316	-1.5692	1213.65	12.6316	-18.3033	12.6316	-18.3033	684.304	116.363	27.9532	60.4946	328.925	86.8901	328.925	86.8901
MPI-ESM_GLAC1D	-108.75	61.2316	-2.36054	1292.14	12.8491	-20.1575	12.8491	-20.1575	639.657	90.5226	32.4703	41.6366	261.3	101.774	261.3	101.774
MPI-ESM_GLAC1D	-105	61.2316	-3.51793	1346.02	12.4916	-22.0774	12.4916	-22.0774	640.679	89.267	34.2009	35.2919	242.732	104.826	242.732	104.826
MPI-ESM_GLAC1D	-101.25	61.2316	-4.30276	1353.37	11.9422	-23.0071	11.9422	-23.0071	628.999	88.0676	30.7974	37.701	238.357	92.7114	238.357	92.7114
MPI-ESM_GLAC1D	-97.5	61.2316	-4.26126	1309.42	11.5437	-22.3112	11.5437	-22.3112	581.019	82.3333	24.485	43.5926	229.653	75.5868	229.653	75.5868
MPI-ESM_GLAC1D	-75	61.2316	-4.90221	1182.15	9.41222	-19.8854	9.41222	-19.8854	423.928	55.4745	21.8286	38.1581	159.372	66.2182	159.372	66.2182
MPI-ESM_GLAC1D	-71.25	61.2316	-4.91149	1184.37	9.54568	-20.1803	9.54568	-19.8125	471.448	66.0334	23.9547	39.2298	182.475	72.7714	182.475	74.2721
MPI-ESM_GLAC1D	-45	61.2316	-1.83792	296.615	1.55754	-4.19633	1.59581	-5.61128	1154.21	127.753	79.3545	18.3898	369.301	244.219	349.691	247.691
MPI-ESM_GLAC1D	15	57.521	5.27911	629.777	13.0105	4.1564	13.0105	-3.05399	1103.8	134.363	74.3355	19.6913	352.14	227.258	352.14	237.813
MPI-ESM_GLAC1D	26.25	57.521	4.23972	830.093	14.3237	-6.97522	14.3237	-6.97522	920.38	118.06	55.135	25.1313	313.193	166.6	313.193	166.6
MPI-ESM_GLAC1D	30	57.521	3.29473	890.824	14.0587	-8.78967	14.0587	-8.78967	945.916	116.195	54.5536	25.5799	316.371	164.385	316.371	164.385
MPI-ESM_GLAC1D	33.75	57.521	2.13311	931.44	13.4116	-10.4778	13.4116	-10.4778	853.728	90.7925	50.7534	20.8313	259.509	152.514	259.509	152.514
MPI-ESM_GLAC1D	37.5	57.521	1.22995	965.37	11.4239	-11.7981	12.9838	-11.7981	876.255	94.1952	48.9027	22.5287	269.698	148.717	268.143	148.717
MPI-ESM_GLAC1D	41.25	57.521	0.732067	998.896	11.2617	-12.6901	12.9884	-12.6901	870.428	93.253	48.3069	21.5624	270.1	148.907	263.063	148.907
MPI-ESM_GLAC1D	45	57.521	0.506319	1028.87	11.3438	-13.2604	13.2071	-13.2604	860.078	97.0629	47.9683	21.0802	269.019	150.182	256.337	150.182
MPI-ESM_GLAC1D	48.75	57.521	0.2918	1045.71	11.2891	-13.679	13.2325	-13.679	856.195	100.855	46.522	22.323	272.564	147.172	256.981	147.172
MPI-ESM_GLAC1D	52.5	57.521	-0.111683	1045.79	10.8353	-14.0631	12.8484	-14.0631	853.881	102.237	44.9787	23.9732	277.449	141.799	262.144	141.799
MPI-ESM_GLAC1D	56.25	57.521	-0.669625	1037.39	10.0671	-14.4804	12.2149	-14.4804	859.876	103.548	42.7775	27.3883	291.831	134.189	279.749	134.189
MPI-ESM_GLAC1D	60	57.521	-1.19095	1041.03	9.41995	-14.998	11.7983	-14.998	861.177	110.276	41.2932	31.5003	308.111	128.867	300.034	128.867
MPI-ESM_GLAC1D	63.75	57.521	-1.47317	1068.89	9.29169	-15.5852	11.9213	-15.5852	843.191	116.462	40.1939	35.4838	317.693	125.201	312.443	125.201
MPI-ESM_GLAC1D	67.5	57.521	-1.48229	1116.51	9.75979	-16.1946	12.5261	-16.1946	784.591	116.296	38.461	38.0436	305.832	119.587	299.563	119.587
MPI-ESM_GLAC1D	71.25	57.521	-1.31302	1158.67	10.4382	-16.5768	13.2123	-16.5768	698.881	102.792	34.4747	38.5052	274.716	107.717	267.497	107.717
MPI-ESM_GLAC1D	75	57.521	-1.13105	1178.88	10.9772	-16.6484	13.6538	-16.6484	595.653	86.169	29.4378	36.3649	229.485	92.0222	221.519	92.0222
MPI-ESM_GLAC1D	78.75	57.521	-1.12454	1167.43	11.015	-13.83	13.586	-16.4179	554.898	74.5739	27.7335	31.5962	201.769	96.1418	195.111	87.2714
MPI-ESM_GLAC1D	82.5	57.521	-1.62373	1135.63	10.2403	-13.8131	12.8191	-16.4121	614.863	78.5093	29.6921	29.0058	214.05	104.898	207.745	94.2517
MPI-ESM_GLAC1D	86.25	57.521	-2.63626	1110.76	8.87763	-17.0657	11.6498	-17.0657	731.949	91.204	32.7239	29.0835	251.091	104.821	242.86	104.821
MPI-ESM_GLAC1D	90	57.521	-3.77135	1119.56	7.7038	-18.3587	10.7299	-18.3587	771.161	102.595	30.8345	32.9082	272.474	99.6945	267.159	99.6945
MPI-ESM_GLAC1D	93.75	57.521	-4.69827	1151.62	10.2156	-19.7851	10.2156	-19.7851	720.656	105.965	24.1418	41.538	278.339	79.0038	278.339	79.0038
MPI-ESM_GLAC1D	97.5	57.521	-5.25849	1189.29	10.0991	-20.886	10.0991	-20.886	651.191	104.395	17.4777	53.1252	285.186	58.0309	285.186	58.0309
MPI-ESM_GLAC1D	101.25	57.521	-5.7917	1228.82	10.0737	-21.9199	10.0737	-21.9199	629.84	109.446	14.6086	61.5746	300.018	48.3548	300.018	48.3548
MPI-ESM_GLAC1D	105	57.521	-6.72903	1278.03	9.85037	-23.4023	9.85037	-23.4023	633.585	110.467	14.8769	62.0199	303.421	48.7158	303.421	48.7158
MPI-ESM_GLAC1D	108.75	57.521	-8.09866	1350.27	9.52745	-25.5683	9.52745	-25.5683	607.087	101.126	16.0373	58.7944	283.587	50.9248	283.587	50.9248
MPI-ESM_GLAC1D	112.5	57.521	-9.52102	1423.96	9.06456	-27.8665	9.06456	-27.8665	604.339	106.252	15.7141	63.1623	294.845	48.9825	294.845	48.9825
MPI-ESM_GLAC1D	116.25	57.521	-10.5075	1496.74	8.94086	-29.7304	8.94086	-29.7304	595.083	116.52	14.0615	72.9504	313.986	43.0285	313.986	43.0285
MPI-ESM_GLAC1D	120	57.521	-10.9447	1544.87	8.99164	-30.6855	8.99164	-30.6855	611.368	126.871	12.883	80.7972	341.144	38.9405	341.144	38.9405
MPI-ESM_GLAC1D	123.75	57.521	-10.9618	1566.37	9.16547	-30.7968	9.16547	-30.7968	618.668	128.053	11.9949	83.3551	349.905	36.3923	349.905	36.3923
MPI-ESM_GLAC1D	127.5	57.521	-10.8579	1555.54	9.03331	-30.4192	9.03331	-30.4192	606.045	122.471	11.5656	81.8753	334.247	35.2219	334.247	35.2219
MPI-ESM_GLAC1D	131.25	57.521	-10.5785	1497.2	8.45779	-29.3958	8.45779	-29.3958	599.153	123.742	12.7482	79.5855	321.193	38.5944	321.193	38.5944
MPI-ESM_GLAC1D	135	57.521	-9.86998	1387.53	6.41171	-27.122	7.62771	-27.4882	623.249	124.994	16.2485	73.5908	319.104	53.1219	316.133	51.9537
MPI-ESM_GLAC1D	157.5	57.521	-4.34638	896.855	7.05168	-14.9635	7.05168	-14.9635	677.114	98.8395	39.1125	38.7944	272.713	123.659	272.713	123.659
MPI-ESM_GLAC1D	-157.5	57.521	-0.311227	721.54	1.77251	-6.77966	8.31521	-9.10022	1182.08	131.558	66.7073	19.0664	365.435	226.744	297.769	232.351
MPI-ESM_GLAC1D	-153.75	57.521	0.460909	721.704	2.32915	-5.82523	9.24945	-8.11324	1283.27	137.204	79.5044	16.887	396.131	260.684	301.669	268.994
MPI-ESM_GLAC1D	-135	57.521	-0.642444	726.037	1.15206	1.71727	8.64268	-10.0032	1922.91	254.641	91.4972	34.1373	719.161	295.909	397.536	465.068
MPI-ESM_GLAC1D	-131.25	57.521	-2.70494	826.158	-1.21903	0.401514	7.98708	-13.2793	1628.87	213.069	60.3574	34.5481	600.21	236.62	347.909	412.707
MPI-ESM_GLAC1D	-127.5	57.521	-3.63675	922.411	-2.60835	-5.54933	8.3393	-15.3834	1162.26	136.789	50.0441	26.287	384.964	184.817	300.377	290.25
MPI-ESM_GLAC1D	-123.75	57.521	-3.36006	990.378	9.11078	-10.43	9.11078	-16.0781	735.279	107.15	37.269	34.7494	273.722	123.483	273.722	150.613
MPI-ESM_GLAC1D	-120	57.521	-1.74238	985.811	8.99286	-11.9739	10.2553	-14.6901	645.316	134.045	21.9321	70.6512	336.94	75.5361	316.24	85.9353
MPI-ESM_GLAC1D	-116.25	57.521	-0.187041	1006.05	10.6921	-10.9009	11.7377	-13.6894	666.064	148.93	18.0078	82.0198	375.87	58.8767	351.375	67.2789
MPI-ESM_GLAC1D	-112.5	57.521	0.830863	1064.01	12.2422	-10.6946	13.239	-13.6412	654.378	134.517	20.8481	76.2087	348.042	66.1154	344.159	71.7357
MPI-ESM_GLAC1D	-108.75	57.521	0.760062	1147.87	14.1277	-11.7792	14.1277	-14.9056	625.99	111.89	26.3413	59.6265	301.184	84.9411	301.184	89.981
MPI-ESM_GLAC1D	-105	57.521	-0.317249	1226.01	14.0815	-17.0221	14.0815	-17.0221	673.438	111.112	34.8746	49.347	300.777	107.601	300.777	107.601
MPI-ESM_GLAC1D	-101.25	57.521	-1.64863	1266.73	13.3497	-18.9427	13.3497	-18.9427	709.265	114.321	36.0282	47.7652	311.735	108.697	311.735	108.697
MPI-ESM_GLAC1D	-97.5	57.521	-2.45901	1243.58	12.3569	-19.5162	12.3569	-19.5162	713.217	114.154	31.2006	49.3182	312.606	96.0315	312.606	96.0315
MPI-ESM_GLAC1D	-93.75	57.521	-2.22252	1180.91	11.8478	-18.3574	11.8478	-18.3574	638.992	95.8529	26.9714	47.244	268.467	87.6205	268.467	87.6205
MPI-ESM_GLAC1D	-75	57.521	-2.17841	1103.08	10.3336	-15.7584	11.6342	-15.7584	608.273	77.6127	32.0687	32.3111	219.898	101.402	201.869	101.402
MPI-ESM_GLAC1D	-71.25	57.521	-3.12698	1126.64	9.64218	-16.705	11.2377	-16.705	734.843	94.208	38.2398	34.9468	275.307	116.629	257.737	116.629
MPI-ESM_GLAC1D	-67.5	57.521	-3.12682	1087.99	9.38046	-16.1484	10.7866	-16.1484	841.624	103.793	46.1674	30.9141	299.316	141.721	296.718	141.721
MPI-ESM_GLAC1D	-63.75	57.521	-2.02558	990.989	9.62395	-13.8704	10.614	-13.8704	919.026	107.494	54.9678	24.8054	307.309	169.306	303.332	169.306
MPI-ESM_GLAC1D	0	53.8103	8.75127	428.111	13.8505	7.45588	14.1459	3.51762	1473.74	161.009	96.1612	16.2032	435.952	300.963	435.536	355.25
MPI-ESM_GLAC1D	7.5	53.8103	6.9347	530.929	0.537531	5.79377	13.5353	0.152389	1194.38	118.148	75.1624	13.5172	335.525	248.591	329.635	318.609
MPI-ESM_GLAC1D	11.25	53.8103	6.76657	561.182	13.683	2.48597	13.683	-0.558549	1163.6	128.379	78.5488	15.6039	358.144	244.252	358.144	263.201
MPI-ESM_GLAC1D	15	53.8103	6.95277	593.822	13.0879	0.196008	14.2319	-0.910763	979.215	110.587	66.7099	19.0401	314.447	202.184	309.197	203.098
MPI-ESM_GLAC1D	18.75	53.8103	6.93568	639.748	14.7644	-0.318966	14.7644	-1.62691	921.168	99.8309	63.9988	15.229	281.084	196.583	281.084	198.195
MPI-ESM_GLAC1D	22.5	53.8103	6.37806	705.565	14.9643	-1.60738	14.9643	-3.17313	981.484	107.193	68.4328	14.6639	299.605	208.794	299.605	210.417
MPI-ESM_GLAC1D	26.25	53.8103	5.30922	780.491	14.7377	-3.54618	14.7377	-5.38081	987.913	99.2357	69.1451	12.4837	289.383	209.809	289.383	210.594
MPI-ESM_GLAC1D	30	53.8103	4.18096	851.934	14.3881	-5.50191	14.3881	-7.56115	1042.67	100.226	70.5362	12.2693	293.242	217.454	293.242	214.445
MPI-ESM_GLAC1D	33.75	53.8103	3.35332	904.286	12.6791	-6.91076	14.1765	-9.10412	1073.62	103.354	71.2404	12.8079	307.555	221.109	300.443	215.054
MPI-ESM_GLAC1D	37.5	53.8103	3.00469	942.915	12.6804	-7.68029	14.3256	-9.95243	1025.47	105.659	65.7868	15.248	309.393	206.477	296.427	200.8
MPI-ESM_GLAC1D	41.25	53.8103	3.20017	971.464	13.1166	-7.85868	14.8842	-10.136	944.715	106.177	61.6255	17.9526	299.189	193.102	285.338	188.662
MPI-ESM_GLAC1D	45	53.8103	3.57452	1004.47	13.7533	-7.94852	15.6303	-10.2239	799.578	92.9467	53.2975	18.8286	253.149	172.877	234.685	171.517
MPI-ESM_GLAC1D	48.75	53.8103	3.61911	1034.75	14.0345	10.6004	15.9734	-10.5768	707.589	78.7485	40.6935	18.7444	212.372	148.581	192.261	160.024
MPI-ESM_GLAC1D	52.5	53.8103	3.06687	1050.43	-7.468	10.2638	15.5261	-11.2851	683.106	72.4621	38.7502	19.6626	189.208	141.995	178.245	159.494
MPI-ESM_GLAC1D	56.25	53.8103	2.21856	1051.22	12.7429	9.52487	14.6752	-12.0338	687.184	73.2391	36.8848	20.4793	206.172	141.731	187.727	155.276
MPI-ESM_GLAC1D	60	53.8103	1.76625	1058.5	12.347	9.24492	14.3634	-12.4212	638.139	70.573	31.029	21.3043	196.326	125.586	177.782	147.645
MPI-ESM_GLAC1D	63.75	53.8103	1.86	1091.28	12.806	9.60169	14.8823	-12.6562	527.768	63.2904	20.8115	25.0432	163.429	91.1261	144.799	132.354
MPI-ESM_GLAC1D	67.5	53.8103	2.22963	1127.89	13.6335	10.1394	15.7397	-12.7487	453.512	56.9414	15.3635	29.4838	141.535	68.1241	120.624	120.625
MPI-ESM_GLAC1D	71.25	53.8103	2.48451	1153.03	14.2513	10.4025	16.3282	-12.8541	413.434	48.9859	12.8469	29.1977	130.765	62.875	113.994	106.328
MPI-ESM_GLAC1D	75	53.8103	2.44512	1140.68	14.1485	10.1388	16.172	-12.7526	440.09	60.8225	14.9414	33.0969	157.377	75.8124	146.491	92.6907
MPI-ESM_GLAC1D	78.75	53.8103	1.9723	1087.16	15.1264	-10.1744	15.1264	-12.5032	521.693	87.4091	20.2608	43.5098	209.573	89.9138	209.573	84.0166
MPI-ESM_GLAC1D	82.5	53.8103	0.920056	1014.07	13.3745	-12.4713	13.3745	-12.4713	665.999	106.606	31.2181	44.5354	273.456	96.3802	273.456	96.3802
MPI-ESM_GLAC1D	86.25	53.8103	-0.840524	973.295	9.25263	-13.4811	11.407	-13.4811	820.007	114.648	37.7547	37.9495	320.747	118.122	307.697	118.122
MPI-ESM_GLAC1D	90	53.8103	-3.08108	976.245	6.90497	-15.6627	9.4669	-15.6627	817.169	109.823	36.5825	32.8528	301.025	115.683	280.154	115.683
MPI-ESM_GLAC1D	93.75	53.8103	-5.01614	1028.63	5.47528	-18.5149	8.11729	-18.5149	697.424	103.057	26.1606	40.939	275.395	83.0538	257.248	83.0538
MPI-ESM_GLAC1D	97.5	53.8103	-5.81855	1075.55	5.22594	-20.0807	7.81065	-20.0807	615.847	104.076	16.6521	57.4602	279.754	53.3445	271.511	53.3445
MPI-ESM_GLAC1D	101.25	53.8103	-6.10192	1135.22	8.22211	-21.1875	8.22211	-21.1875	607.978	109.537	11.9874	72.0948	312.088	38.6923	312.088	38.6923
MPI-ESM_GLAC1D	105	53.8103	-6.50719	1205.81	8.75401	-22.4212	8.75401	-22.4212	625.608	116.32	11.8478	75.864	333.659	38.0394	333.659	38.0394
MPI-ESM_GLAC1D	108.75	53.8103	-7.28567	1282.19	9.0255	-24.1028	9.0255	-24.1028	621.634	112.858	13.0446	73.2905	325.524	41.6411	325.524	41.6411
MPI-ESM_GLAC1D	112.5	53.8103	-8.1776	1352.19	9.01052	-25.8932	9.01052	-25.8932	614.699	113.54	11.4754	76.5466	329.583	36.7841	329.583	36.7841
MPI-ESM_GLAC1D	116.25	53.8103	-8.59654	1408.99	9.22472	-27.0019	9.22472	-27.0019	624.955	125.099	8.42467	85.9375	355.658	26.6445	355.658	26.6445
MPI-ESM_GLAC1D	120	53.8103	-8.27607	1422.44	9.72732	-26.6302	9.72732	-26.6302	685.816	140.364	7.75392	88.9577	396.362	24.2767	396.362	24.2767
MPI-ESM_GLAC1D	123.75	53.8103	-8.18785	1449.23	10.1791	-26.623	10.1791	-26.623	753.282	151.468	8.15513	87.4799	428.469	26.0738	428.469	26.0738
MPI-ESM_GLAC1D	127.5	53.8103	-8.4927	1473.93	10.2221	-27.0156	10.2221	-27.0156	778.008	151.217	10.1627	83.1488	425.474	32.0262	425.474	32.0262
MPI-ESM_GLAC1D	131.25	53.8103	-8.79332	1456.09	9.69607	-27.0898	9.69607	-27.0898	783.816	148.031	14.9893	76.8477	406.678	45.3124	406.678	45.3124
MPI-ESM_GLAC1D	135	53.8103	-8.21926	1357.92	8.88682	-25.5813	8.88682	-25.5813	800.073	140.999	21.6379	68.0494	388.467	67.339	388.467	67.339
MPI-ESM_GLAC1D	138.75	53.8103	-6.52981	1186.23	8.17082	-21.163	8.17082	-22.1406	836.36	131.43	30.6183	53.9004	364.716	98.7487	364.716	97.7342
MPI-ESM_GLAC1D	157.5	53.8103	-0.798369	663.514	5.52617	-8.70308	7.81275	-8.70308	818.117	110.961	44.2604	33.4651	303.175	132.861	295.927	132.861
MPI-ESM_GLAC1D	-127.5	53.8103	0.276013	705.913	-6.25056	6.93557	9.52029	-8.2135	1767.21	238.376	77.0571	37.8183	610.101	263.685	286.647	546.593
MPI-ESM_GLAC1D	-123.75	53.8103	-1.96113	809.806	-9.9667	-3.98683	8.67328	-11.6705	1290.02	149.455	64.7214	25.8885	406.297	225.764	298.043	387.374
MPI-ESM_GLAC1D	-120	53.8103	-2.4914	885.322	7.21943	-8.76859	8.7182	-13.2936	856.995	132.121	43.6225	35.3517	327.014	154.165	307.045	199.04
MPI-ESM_GLAC1D	-116.25	53.8103	-1.44469	919.2	8.63284	-11.1692	9.75531	-13.1009	712.207	156.82	21.2203	76.8	391.293	76.083	344.301	89.0269
MPI-ESM_GLAC1D	-112.5	53.8103	0.449678	932.288	10.4545	-9.76358	11.5502	-11.7727	771.197	170.89	17.5758	80.822	430.738	61.0124	379.604	73.9753
MPI-ESM_GLAC1D	-108.75	53.8103	2.08802	990.416	12.5267	-11.5198	13.726	-11.166	750.834	160.242	20.6266	74.6313	399.53	69.324	367.295	76.8916
MPI-ESM_GLAC1D	-105	53.8103	2.75078	1081.3	14.0671	-12.1923	15.4493	-11.8125	659.377	127.978	24.1375	63.5234	317.326	77.51	312.653	83.0388
MPI-ESM_GLAC1D	-101.25	53.8103	2.14825	1172.42	15.9539	-13.954	15.9539	-13.6582	640.884	112.681	28.2282	57.4695	300.998	89.4381	300.998	91.2618
MPI-ESM_GLAC1D	-97.5	53.8103	1.10056	1227.31	15.6687	-15.4833	15.6687	-15.3815	667.898	116.33	33.8157	50.2675	297.324	102.835	297.324	104.515
MPI-ESM_GLAC1D	-93.75	53.8103	0.0863968	1214	14.517	-15.9384	14.517	-16.2734	732.838	122.714	35.1593	47.5624	313.732	106.857	313.732	110.294
MPI-ESM_GLAC1D	-90	53.8103	-0.172881	1170.69	12.6917	-15.8951	13.7631	-15.8951	731.44	106.47	38.8835	40.0158	289.625	118.392	285.53	118.392
MPI-ESM_GLAC1D	-86.25	53.8103	0.0750036	1112.45	12.5738	-14.6783	13.3217	-13.3912	700.315	91.7573	41.2593	33.4452	266.325	126.879	247.18	130.758
MPI-ESM_GLAC1D	-82.5	53.8103	0.251273	1069.51	12.3785	-3.25441	13.0437	-12.8652	678.39	86.8619	42.3355	30.8291	250.987	130.722	221.192	132.698
MPI-ESM_GLAC1D	-75	53.8103	-1.29137	1063.71	10.7027	-13.901	11.8705	-13.901	877.272	117.04	43.7891	37.5112	337.323	136.917	314.019	136.917
MPI-ESM_GLAC1D	-71.25	53.8103	-2.18053	1078.85	9.98918	-16.248	11.4435	-16.248	1010.28	137.986	46.5484	42.1721	398.85	139.948	391.832	139.948
MPI-ESM_GLAC1D	-67.5	53.8103	-2.36543	1048.67	11.0424	-15.9583	11.0424	-15.9583	1087.72	151.099	52.1329	39.9864	424.576	156.429	424.576	156.429
MPI-ESM_GLAC1D	-63.75	53.8103	-1.57669	960.488	10.7358	-13.8014	10.7358	-13.8014	1168.13	151.673	62.0906	33.2196	428.209	186.337	428.209	186.337
MPI-ESM_GLAC1D	-60	53.8103	0.0276403	817.958	10.3601	-10.0403	10.3601	-9.44787	1174.3	133.777	68.8606	25.8801	390.491	209.329	390.491	215.243
MPI-ESM_GLAC1D	-7.5	53.8103	10.3714	339.808	6.68532	14.6624	14.6624	6.42127	1098.92	104.624	77.4313	10.1836	313.142	250.138	250.138	306.595
MPI-ESM_GLAC1D	-3.75	53.8103	9.84388	377.14	14.5906	6.62008	14.5906	5.32687	1215.3	118.017	85.4934	9.87916	326.592	273.019	326.592	309.139
MPI-ESM_GLAC1D	0	50.0995	8.62611	401.798	3.8917	13.2691	13.7202	3.60942	1433.34	168.24	80.729	22.2239	471.643	279.963	291.393	443.936
MPI-ESM_GLAC1D	3.75	50.0995	7.23728	453.359	1.76084	10.5542	12.9799	1.50265	1505.7	166.257	93.9676	16.3435	460.147	322.55	346.185	433.303
MPI-ESM_GLAC1D	7.5	50.0995	6.44463	499.656	0.246515	9.94674	12.7032	0.0182739	1295.71	125.941	89.2267	9.31657	348.582	288.906	326.812	331.593
MPI-ESM_GLAC1D	11.25	50.0995	6.22751	535.556	9.24071	9.80156	12.8601	-0.761023	1067.46	115.287	76.3901	14.0793	323.261	231.301	274.65	243.17
MPI-ESM_GLAC1D	15	50.0995	6.1528	568.313	9.57404	9.77161	13.1323	-1.35282	1033.24	121.287	70.3027	19.3306	336.575	220.126	276.525	220.688
MPI-ESM_GLAC1D	18.75	50.0995	5.90655	610.104	12.3718	6.05896	13.3732	-2.23108	1100.07	120.02	72.186	18.3571	345.485	233.165	320.026	230.341
MPI-ESM_GLAC1D	22.5	50.0995	5.68389	666.301	12.6712	-3.31115	13.8152	-3.31115	1129.52	126.268	72.6591	20.9258	365.815	225.661	352.197	225.661
MPI-ESM_GLAC1D	26.25	50.0995	5.85837	735.43	13.4929	-4.22196	14.7644	-4.22196	1040.85	125.883	67.9667	22.5389	344.138	204.648	317.579	204.648
MPI-ESM_GLAC1D	30	50.0995	6.34649	818.832	11.4529	11.4617	16.1896	-4.9967	858.913	102.762	56.599	22.4522	291.908	175.542	222.809	184.683
MPI-ESM_GLAC1D	33.75	50.0995	7.04961	903.765	12.4067	12.8562	18.0047	-5.37235	766.393	85.9678	37.6113	24.1613	240.815	127.856	165.398	205.446
MPI-ESM_GLAC1D	37.5	50.0995	7.53122	968.682	-5.54227	18.538	19.4272	-5.54227	719.615	81.4885	22.9554	32.7053	220.955	92.3933	137.741	220.955
MPI-ESM_GLAC1D	41.25	50.0995	7.87204	1005.03	-5.53641	19.5842	20.2735	-5.53641	625.095	72.272	14.8911	36.9209	197.069	70.3437	120.562	197.069
MPI-ESM_GLAC1D	45	50.0995	8.28187	1039.71	-5.53251	20.5282	21.1056	-5.53251	494.08	57.5921	7.82426	40.5026	164.879	46.0593	83.4997	164.879
MPI-ESM_GLAC1D	48.75	50.0995	8.22149	1062.56	-5.9967	20.6363	21.1655	-5.9967	424.333	55.2199	4.8534	43.7918	154.8	36.3758	59.6341	154.8
MPI-ESM_GLAC1D	52.5	50.0995	7.46579	1092.84	-7.20959	20.1539	20.5978	-7.20959	419.253	60.2025	2.66236	52.2286	165.239	25.2641	51.41	165.239
MPI-ESM_GLAC1D	56.25	50.0995	6.51202	1125.18	-8.48108	19.5055	19.9864	-8.48108	438.401	65.888	2.55162	55.3959	180.339	24.8648	53.8386	180.339
MPI-ESM_GLAC1D	60	50.0995	6.20668	1141.35	-8.85347	19.2542	19.9428	-8.85347	392.749	62.2069	2.47057	57.8153	166.054	20.8808	49.8764	166.054
MPI-ESM_GLAC1D	63.75	50.0995	6.62318	1130.42	-8.25907	19.2919	20.3263	-8.25907	297.317	50.2949	2.05517	61.9027	131.769	13.2849	34.112	131.769
MPI-ESM_GLAC1D	67.5	50.0995	6.81345	1107.45	-7.77535	19.0361	20.2892	-7.77535	259.68	44.5221	2.56848	62.099	113.405	12.2783	26.3084	113.405
MPI-ESM_GLAC1D	71.25	50.0995	6.11911	1089.95	-7.79385	18.1962	19.4265	-8.26298	293.791	46.3112	3.28084	55.4745	125.218	19.1039	34.5443	114.856
MPI-ESM_GLAC1D	75	50.0995	4.74102	1082.24	-8.98786	16.9195	18.0105	-9.46219	368.095	48.5252	5.82906	44.5302	128.36	32.1647	54.7493	118.56
MPI-ESM_GLAC1D	78.75	50.0995	3.32452	1070.86	9.20881	15.5654	16.5411	-10.6061	418.333	45.9137	9.38249	34.8713	135.354	51.7524	87.8634	104.924
MPI-ESM_GLAC1D	82.5	50.0995	1.832	1059.04	7.37417	8.96106	15.0353	-11.7819	429.512	57.2718	10.9744	39.0906	161.605	53.3801	104.547	91.2401
MPI-ESM_GLAC1D	86.25	50.0995	-0.239938	1060.12	4.90542	12.1461	13.2234	-13.6184	445.773	64.7004	11.1188	43.8328	176.359	48.6174	89.3398	95.5161
MPI-ESM_GLAC1D	90	50.0995	-2.77005	1036.95	1.9855	4.36015	10.5157	-15.8326	528.575	80.9116	18.3635	39.6815	204.973	76.8197	124.242	103.426
MPI-ESM_GLAC1D	93.75	50.0995	-4.66328	1055.07	6.08531	-18.1204	8.81651	-18.1204	520.74	76.8913	24.1341	41.6826	213.183	74.8222	177.598	74.8222
MPI-ESM_GLAC1D	97.5	50.0995	-4.72171	1083.82	6.33922	-18.8001	8.92979	-18.8001	479.644	86.1845	13.2785	64.3567	233.052	42.7135	218.805	42.7135
MPI-ESM_GLAC1D	101.25	50.0995	-3.94436	1116.86	9.94998	-18.664	9.94998	-18.664	495.419	111.064	9.77488	80.7	275.55	32.8227	275.55	32.8227
MPI-ESM_GLAC1D	105	50.0995	-3.68379	1179.02	10.9578	-19.2526	10.9578	-19.2526	510.872	116.394	9.63664	83.2288	292.176	32.1449	292.176	32.1449
MPI-ESM_GLAC1D	108.75	50.0995	-4.16149	1240.73	11.3094	-20.4824	11.3094	-20.4824	572.354	118.446	10.9976	78.6024	316.505	36.5621	316.505	36.5621
MPI-ESM_GLAC1D	112.5	50.0995	-4.72073	1276.75	11.2221	-21.4895	11.2221	-21.4895	637.485	127.71	10.256	78.9708	348.756	34.8236	348.756	34.8236
MPI-ESM_GLAC1D	116.25	50.0995	-4.56692	1293.43	11.5737	-21.5162	11.5737	-21.5162	685.074	140.299	8.57781	83.008	379.876	28.9679	379.876	28.9679
MPI-ESM_GLAC1D	120	50.0995	-4.1151	1315.62	12.2957	-21.2252	12.2957	-21.2252	759.153	152.653	8.80434	82.1985	410.273	29.4425	410.273	29.4425
MPI-ESM_GLAC1D	123.75	50.0995	-4.31839	1372.99	12.7983	-21.9726	12.7983	-21.9726	836.616	157.663	10.062	79.3375	438.063	33.9644	438.063	33.9644
MPI-ESM_GLAC1D	127.5	50.0995	-5.41246	1442.92	12.5906	-23.722	12.5906	-23.722	914.072	164.357	12.7736	74.3683	456.438	42.3701	456.438	42.3701
MPI-ESM_GLAC1D	131.25	50.0995	-6.42044	1465.63	11.8536	-24.9127	11.8536	-24.9127	939.77	160.725	16.167	70.7287	455.175	51.6874	455.175	51.6874
MPI-ESM_GLAC1D	135	50.0995	-6.21862	1377.82	10.8959	-23.7259	10.8959	-23.7259	940.663	150.277	21.9264	64.0229	433.764	68.5454	433.764	68.5454
MPI-ESM_GLAC1D	138.75	50.0995	-4.82295	1195.46	9.6837	-19.7841	10.1148	-20.2688	912.91	127.581	25.5201	53.7018	377.252	80.8709	353.441	86.949
MPI-ESM_GLAC1D	-123.75	50.0995	1.54619	648.552	-6.18057	9.28475	9.96235	-6.06441	1515.02	212.1	37.9482	49.0712	588.616	156.713	159.073	581.02
MPI-ESM_GLAC1D	-120	50.0995	-1.43997	802.191	-11.1871	7.89152	9.00206	-10.7916	1027.72	124.594	42.5701	32.5674	360.707	144.974	190.475	355.881
MPI-ESM_GLAC1D	-116.25	50.0995	-1.82701	882.643	7.57034	-1.65328	9.28591	-12.3945	694.189	104.512	31.0948	37.7627	271.761	117.338	229.316	164.133
MPI-ESM_GLAC1D	-112.5	50.0995	-0.0332321	883.739	9.10289	-9.77009	10.8732	-11.0227	639.588	127.982	18.1792	71.381	330.255	70.3599	261.075	87.015
MPI-ESM_GLAC1D	-108.75	50.0995	2.24704	882.619	11.2878	-7.63467	12.9838	-9.07092	739.675	143.125	16.3256	73.7907	382.512	61.8389	316.348	76.6224
MPI-ESM_GLAC1D	-105	50.0995	3.96302	918.046	13.405	-8.52757	15.0522	-8.0299	777.42	148.637	19.9789	66.837	380.811	77.4885	325.826	85.9848
MPI-ESM_GLAC1D	-101.25	50.0995	4.46774	1000	14.8776	-9.14216	16.5157	-8.66076	737.186	133.683	24.5036	56.8226	337.087	88.0272	302.216	96.3836
MPI-ESM_GLAC1D	-97.5	50.0995	3.94268	1097.84	15.4382	-10.9071	17.1329	-10.4902	727.155	121.599	29.5283	48.2325	307.495	101.285	295.412	107.96
MPI-ESM_GLAC1D	-93.75	50.0995	3.09942	1178.42	17.269	-12.6031	17.269	-12.345	769.582	110.555	36.4495	39.9178	296.47	118.07	296.47	122.866
MPI-ESM_GLAC1D	-90	50.0995	2.48907	1209.98	17.1453	-13.2502	17.1453	-13.2623	814.605	104.391	44.5129	33.1824	295.23	133.973	295.23	137.786
MPI-ESM_GLAC1D	-86.25	50.0995	2.07956	1182.45	16.407	-12.9215	16.407	-13.2981	850.733	105.401	49.8038	30.6986	301.836	149.422	301.836	151.77
MPI-ESM_GLAC1D	-82.5	50.0995	1.76787	1141.18	14.4736	-13.0612	15.586	-13.0612	865.27	107.948	52.5244	29.2992	308.704	158.224	300.562	158.224
MPI-ESM_GLAC1D	-78.75	50.0995	1.14271	1099.41	13.3928	-13.235	14.3836	-13.235	931.059	116.079	54.6002	30.2531	332.652	164.032	325.796	164.032
MPI-ESM_GLAC1D	-75	50.0995	0.474418	1086.87	12.482	-13.8372	13.5906	-13.8372	1052.48	136.656	57.1201	32.4424	377.844	172.815	376.173	172.815
MPI-ESM_GLAC1D	-71.25	50.0995	-0.035999	1069.83	12.9929	-14.1445	12.9929	-14.1445	1175.86	154.53	60.337	34.7345	430.496	182.8	430.496	182.8
MPI-ESM_GLAC1D	-67.5	50.0995	0.0946976	1017.28	12.6707	-13.1803	12.6707	-13.1803	1270.19	169.21	65.5245	35.3449	475.164	198.138	475.164	198.138
MPI-ESM_GLAC1D	-3.75	50.0995	10.1393	361.003	6.01865	14.4371	14.685	5.72596	1071.91	125.483	56.7971	23.5132	353.398	194.748	205.794	331.166
MPI-ESM_GLAC1D	0	46.3886	9.54489	431.254	4.46879	14.8661	15.1375	4.46879	1102.31	136.58	49.1137	29.8988	352.628	173.994	195.846	352.628
MPI-ESM_GLAC1D	3.75	46.3886	8.29489	446.917	3.11435	11.7937	14.129	2.88546	1206.07	127.083	66.7813	16.2922	348.238	233.369	278.16	331.464
MPI-ESM_GLAC1D	7.5	46.3886	7.79668	498.326	6.5646	11.4799	14.284	1.64262	1042.12	106.173	67.0562	13.3923	296.309	217.045	233.935	264.572
MPI-ESM_GLAC1D	11.25	46.3886	7.48695	569.095	6.59259	14.0061	14.8406	0.327519	926.454	106.682	44.7815	25.6735	296.369	147.372	163.853	244.435
MPI-ESM_GLAC1D	15	46.3886	6.8849	633.139	6.37124	14.0133	15.017	-1.1829	1021.05	117.46	50.9049	26.1209	329.041	161.451	183.664	271.567
MPI-ESM_GLAC1D	18.75	46.3886	6.25941	676.524	9.81493	10.6538	14.9011	-2.46154	1160.91	124.187	74.0443	16.6853	358.398	233.293	280.87	276.774
MPI-ESM_GLAC1D	22.5	46.3886	6.53008	703.45	10.1717	6.56938	15.4311	-2.66923	1082.45	133.42	61.0098	25.7577	371.111	206.087	329.826	214.864
MPI-ESM_GLAC1D	26.25	46.3886	8.22002	737.158	11.9809	8.46782	17.4311	-1.56962	800.369	113.002	39.0772	36.898	312.93	134.139	236.512	149.583
MPI-ESM_GLAC1D	30	46.3886	10.7203	803.506	14.7563	19.926	20.8041	0.0638468	484.053	71.641	7.64687	50.2281	198.205	42.5641	88.5558	130.608
MPI-ESM_GLAC1D	33.75	46.3886	11.9837	863.794	0.688847	22.0217	22.9519	0.688847	412.839	53.2431	1.57792	58.2938	155.503	14.0396	42.2712	155.503
MPI-ESM_GLAC1D	37.5	46.3886	11.6606	926.512	-0.126257	22.8557	23.5978	-0.126257	515.856	76.715	1.43825	63.9486	225.261	14.0963	42.5553	225.261
MPI-ESM_GLAC1D	41.25	46.3886	10.8504	961.276	-1.17248	22.9039	23.2429	-1.17248	596.346	76.2652	3.98538	54.6538	224.561	27.5495	70.9709	224.561
MPI-ESM_GLAC1D	45	46.3886	11.2256	969.337	9.57046	23.2542	23.6245	-1.01428	402.585	52.7068	5.83551	45.8599	146.054	31.8769	51.6353	131.962
MPI-ESM_GLAC1D	56.25	46.3886	12.3725	1120.96	-2.14709	25.2594	26.2983	-2.14709	133.933	28.0399	0.31363	80.6414	77.6615	3.39173	4.702	77.6615
MPI-ESM_GLAC1D	60	46.3886	12.0304	1187.28	-3.20503	25.3759	26.8562	-3.20503	157.279	36.7906	0.139332	95.4599	99.7119	1.34584	2.88879	99.7119
MPI-ESM_GLAC1D	63.75	46.3886	11.6113	1181.15	-3.54943	24.6669	26.3543	-3.54943	176.64	40.6496	0.342371	95.4745	109.272	1.5216	3.15704	109.272
MPI-ESM_GLAC1D	67.5	46.3886	10.3673	1115.61	-4.00972	22.7476	24.3289	-4.00972	221.538	42.8114	0.328265	80.8132	114.569	2.42711	6.143	114.569
MPI-ESM_GLAC1D	71.25	46.3886	7.9819	1062.88	-5.72782	20.0927	21.3653	-5.72782	322.41	49.5517	0.628278	68.4958	132.354	5.81722	15.1099	132.354
MPI-ESM_GLAC1D	75	46.3886	5.31882	1058.5	-1.29724	17.5335	18.6388	-8.32743	334.86	50.1932	0.812609	65.9699	138.089	5.86203	17.2324	121.881
MPI-ESM_GLAC1D	78.75	46.3886	3.76169	1087.47	3.50015	16.1871	17.4272	-10.2356	266.689	44.0935	1.46869	64.7963	118.787	6.96428	17.6376	82.2629
MPI-ESM_GLAC1D	82.5	46.3886	3.07126	1130.95	3.0978	15.7131	17.2039	-11.5891	178.22	32.2276	1.42984	64.996	84.2339	6.57001	14.4252	50.0037
MPI-ESM_GLAC1D	86.25	46.3886	1.70277	1156.67	-5.41117	14.5139	16.2136	-13.194	155.953	27.621	0.658943	65.6954	72.123	4.50062	8.89887	49.414
MPI-ESM_GLAC1D	90	46.3886	-0.211129	1182.36	-7.63708	12.9716	14.7846	-15.2265	187.578	34.2158	1.10817	66.957	86.5192	5.75287	11.0176	61.8842
MPI-ESM_GLAC1D	93.75	46.3886	-1.44339	1202.42	-8.84737	5.82434	13.8777	-16.6803	200.958	35.3291	4.21275	50.8009	83.949	19.4753	30.3373	54.0111
MPI-ESM_GLAC1D	97.5	46.3886	-0.8415	1217.7	14.4819	-13.9218	14.4819	-16.569	177.698	29.7586	6.23473	49.0568	68.0608	23.9124	68.0608	25.0561
MPI-ESM_GLAC1D	101.25	46.3886	0.610323	1228	15.7866	-15.7209	15.7866	-15.6048	208.592	51.2321	4.96712	82.5932	118.107	14.9685	118.107	17.3529
MPI-ESM_GLAC1D	105	46.3886	1.05026	1257.52	16.4337	-15.8635	16.4337	-15.7513	221.5	55.853	5.13629	90.4497	133.889	15.5845	133.889	17.6502
MPI-ESM_GLAC1D	108.75	46.3886	0.0697952	1279.7	15.7286	-17.1246	15.7286	-16.9947	342.885	87.1369	7.11519	92.0015	206.398	21.8636	206.398	24.8669
MPI-ESM_GLAC1D	112.5	46.3886	-1.03811	1273.82	14.5958	-18.1037	14.5958	-17.9518	543.563	124.494	9.82527	86.6851	315.712	29.7974	315.712	34.0848
MPI-ESM_GLAC1D	116.25	46.3886	-1.17093	1263.68	14.3445	-18.0224	14.3445	-17.9134	717.389	157.486	10.5977	86.2825	410.254	31.8929	410.254	35.9383
MPI-ESM_GLAC1D	120	46.3886	-0.888864	1288.05	14.8888	-17.9388	14.8888	-17.9388	825.69	171.507	12.2366	81.8749	449.746	41.1452	449.746	41.1452
MPI-ESM_GLAC1D	123.75	46.3886	-1.22122	1352.79	15.2918	-19.0774	15.2918	-19.0774	909.978	176.844	16.4019	74.738	462.908	54.9352	462.908	54.9352
MPI-ESM_GLAC1D	127.5	46.3886	-2.22301	1410.94	11.6888	-20.7356	14.9467	-20.7356	1024.92	183.985	18.3301	70.6672	499.287	60.9926	493.427	60.9926
MPI-ESM_GLAC1D	131.25	46.3886	-2.55862	1390.05	10.6543	-20.6126	14.2924	-20.6126	1056.26	179.173	19.1625	68.9808	507.32	63.7799	495.683	63.7799
MPI-ESM_GLAC1D	135	46.3886	-1.57994	1273.91	9.71747	-17.9694	13.7646	-17.9694	972.412	155.654	18.7432	65.9672	451.237	62.0104	375.225	62.0104
MPI-ESM_GLAC1D	-123.75	46.3886	5.39678	604.653	-1.99177	13.1051	13.1051	-1.88602	1243.08	196.088	7.02048	70.4619	571.364	36.4132	36.4132	564.674
MPI-ESM_GLAC1D	-120	46.3886	1.96661	826.928	-7.53837	12.4664	12.4962	-7.53837	928.315	141.592	8.06906	62.1493	407.65	37.2197	67.2892	407.65
MPI-ESM_GLAC1D	-116.25	46.3886	0.43503	942.047	3.78758	12.1558	12.3992	-10.4335	614.916	82.0398	8.77424	48.0281	212.778	46.771	107.48	209.102
MPI-ESM_GLAC1D	-112.5	46.3886	1.2612	965.499	5.33771	8.51705	13.4506	-10.164	468.191	100.18	9.87268	72.2463	247.599	39.4445	138.618	87.6066
MPI-ESM_GLAC1D	-108.75	46.3886	2.95456	913.677	11.6491	-7.23688	14.4213	-7.99996	614.935	128.451	16.9939	72.7457	312.225	58.3231	242.859	68.0853
MPI-ESM_GLAC1D	-105	46.3886	4.25225	880.208	12.8614	-7.34398	15.1909	-6.59436	803.188	144.178	22.6979	64.6111	375.913	79.8868	322.276	85.6426
MPI-ESM_GLAC1D	-101.25	46.3886	4.84665	902.997	9.95685	-7.16559	15.9995	-6.51493	891.737	146.552	31.0283	54.1183	388.839	98.9375	316.548	108.24
MPI-ESM_GLAC1D	-97.5	46.3886	5.19984	975.298	15.0508	-7.77562	17.1655	-7.24605	1019.22	146.187	37.4239	47.204	407.153	116.799	364.966	128.131
MPI-ESM_GLAC1D	-93.75	46.3886	5.37351	1045.56	15.9239	-8.45661	18.1466	-8.06636	1033.89	135.185	45.027	38.9948	385.297	138.447	360.693	148.907
MPI-ESM_GLAC1D	-90	46.3886	5.41062	1093.09	16.3867	-8.92796	18.6948	-8.67704	1027.25	127.675	53.8371	30.6177	357.484	167.83	342.752	177.151
MPI-ESM_GLAC1D	-86.25	46.3886	4.90036	1106.69	18.3028	-9.43252	18.3028	-9.34175	1090.86	129.382	63.2117	25.4889	362.243	198.145	362.243	205.971
MPI-ESM_GLAC1D	-82.5	46.3886	3.9933	1099.73	17.239	-10.1259	17.239	-10.1901	1146.38	136.534	67.4655	26.8548	393.356	205.282	393.356	211.298
MPI-ESM_GLAC1D	-78.75	46.3886	3.24688	1095.86	16.3575	-10.831	16.3575	-10.9928	1141.63	139.789	65.5716	27.9088	396.022	198.277	396.022	204.363
MPI-ESM_GLAC1D	-75	46.3886	2.89304	1089.26	13.7904	-11.1793	15.8751	-11.3724	1153.25	137.313	67.037	26.0185	391.447	203.748	384.75	210.411
MPI-ESM_GLAC1D	-71.25	46.3886	3.0781	1067.45	13.6966	-10.6545	15.8465	-10.9095	1251.69	146.392	74.6969	24.0704	419.775	229.56	408.514	237.601
MPI-ESM_GLAC1D	-67.5	46.3886	3.70424	997.741	15.7989	-8.81729	15.7989	-9.23759	1418.66	176.53	78.0063	26.5088	483.223	252.472	483.223	266.839
MPI-ESM_GLAC1D	-63.75	46.3886	4.96384	882.313	15.8139	-6.19201	15.8139	-6.19201	1505.91	185.322	82.791	26.158	520.257	286.574	520.257	286.574
MPI-ESM_GLAC1D	0	42.6776	12.116	539.946	9.4064	16.9396	19.1884	6.12635	713.797	77.394	36.3317	21.7646	220.425	121.659	140.425	186.848
MPI-ESM_GLAC1D	11.25	42.6776	14.026	675.196	12.0268	22.4364	23.0294	6.11853	462.925	68.8428	12.1888	43.4065	175.588	49.4321	55.2006	136.381
MPI-ESM_GLAC1D	15	42.6776	13.1403	787.379	3.85747	22.8336	23.6472	3.85747	518.701	73.4953	2.03865	63.0692	204.133	15.0376	27.5735	204.133
MPI-ESM_GLAC1D	18.75	42.6776	11.6663	872.277	1.35551	22.5107	23.2814	1.35551	648.116	90.6751	3.57942	58.5947	245.267	26.774	43.179	245.267
MPI-ESM_GLAC1D	22.5	42.6776	11.1253	902.682	5.32711	22.4117	23.0379	0.30343	607.684	84.0831	3.64772	55.0824	222.631	28.261	58.9134	209.756
MPI-ESM_GLAC1D	26.25	42.6776	12.2669	873.313	10.6785	23.01	23.6935	1.56059	486.862	65.4523	7.37232	49.2586	182.529	35.3762	51.884	157.164
MPI-ESM_GLAC1D	41.25	42.6776	9.98125	955.071	7.50991	22.5152	22.6114	-1.30399	727.7	104.65	3.26047	56.783	284.932	33.104	76.7978	248.68
MPI-ESM_GLAC1D	45	42.6776	11.1307	941.983	8.83088	23.2314	23.5418	-0.167924	412.511	76.7368	4.24394	62.9455	197.912	35.2733	47.7534	88.7921
MPI-ESM_GLAC1D	52.5	42.6776	16.6894	893.217	5.22465	27.9858	27.9858	5.22465	38.4572	8.30846	0.00211224	74.743	23.9025	0.11259	0.11259	23.9025
MPI-ESM_GLAC1D	56.25	42.6776	17.1539	1000.28	4.40955	28.3401	29.7827	4.40955	25.9919	7.40736	0.00158418	87.5162	20.0264	0.0522779	0.0603497	20.0264
MPI-ESM_GLAC1D	60	42.6776	16.1585	1119.59	1.94666	28.3648	30.2117	1.94666	63.5461	18.9807	0.00512972	110.44	50.396	0.0642347	0.100105	50.396
MPI-ESM_GLAC1D	63.75	42.6776	13.5965	1145.02	-0.988888	27.92	27.92	-0.988888	194.799	49.1486	0.00761915	107.063	133.957	0.330415	0.330415	133.957
MPI-ESM_GLAC1D	67.5	42.6776	9.78773	1101.39	-4.45503	22.2535	23.575	-4.45503	365.267	67.5307	0.0840747	90.2225	196.402	0.77953	1.75489	196.402
MPI-ESM_GLAC1D	71.25	42.6776	5.37351	1064.14	-1.69242	17.8798	18.7163	-8.32483	414.8	79.7084	0.310009	81.9255	208.692	1.80185	8.59252	163.689
MPI-ESM_GLAC1D	75	42.6776	2.5265	1055.24	1.37059	15.0439	15.8842	-10.8906	379.559	87.2108	0.911243	82.7063	203.631	4.5475	19.6566	112.252
MPI-ESM_GLAC1D	78.75	42.6776	2.5475	1072.35	2.24299	14.8622	16.0945	-11.2474	246.206	62.1692	1.31906	89.2279	147.778	6.45274	20.5944	55.5247
MPI-ESM_GLAC1D	82.5	42.6776	4.04213	1098.56	4.70132	16.0829	17.7449	-10.2766	168.039	40.4212	0.719293	86.7315	96.9526	3.65304	10.8268	47.2841
MPI-ESM_GLAC1D	86.25	42.6776	4.3626	1123.27	-1.53096	16.4924	18.4064	-10.2467	106.685	24.164	0.22831	81.7678	60.6906	1.60489	3.96037	37.1127
MPI-ESM_GLAC1D	90	42.6776	2.67266	1163.12	-3.81482	15.4983	17.4982	-12.2096	118.521	27.0128	0.767271	85.0467	68.7681	2.68575	3.50141	42.9355
MPI-ESM_GLAC1D	93.75	42.6776	0.920544	1203.58	-6.06872	7.81849	16.4877	-14.1744	176.319	37.337	3.29498	73.5176	93.3587	13.426	15.6796	54.4024
MPI-ESM_GLAC1D	97.5	42.6776	1.42038	1220.01	-5.26924	-11.7844	17.0424	-14.0208	156.448	22.3216	5.09707	47.7443	56.3906	22.1071	53.202	28.1441
MPI-ESM_GLAC1D	101.25	42.6776	3.20196	1213.47	16.023	-12.8967	18.312	-12.567	180.554	42.2374	4.16077	81.6026	101.535	13.9023	99.2546	17.7129
MPI-ESM_GLAC1D	105	42.6776	4.14271	1214.37	16.5432	-12.4065	18.8282	-12.0664	216.288	55.8841	3.32654	101.567	138.99	11.0294	136.634	13.6996
MPI-ESM_GLAC1D	108.75	42.6776	3.36016	1210.5	15.551	-13.4182	17.7781	-13.0475	377.912	99.8298	4.30806	109.495	249.919	13.4846	247.717	16.2657
MPI-ESM_GLAC1D	112.5	42.6776	2.32386	1187.32	16.3953	-14.314	16.3953	-13.871	658.471	162.967	6.57461	103.681	418.491	20.8689	418.491	24.5952
MPI-ESM_GLAC1D	116.25	42.6776	2.58623	1167.79	16.5522	-13.6981	16.5522	-13.278	885.205	205.815	8.49173	96.0296	533.825	26.1794	533.825	31.1787
MPI-ESM_GLAC1D	120	42.6776	3.02829	1198.11	17.3582	-13.2988	17.3582	-13.2988	918.302	212.353	11.0796	89.2638	530.968	38.4286	530.968	38.4286
MPI-ESM_GLAC1D	123.75	42.6776	2.74802	1254.43	17.7091	-14.4088	17.7091	-14.4088	914.892	203.723	14.3253	81.9825	502.931	48.6733	502.931	48.6733
MPI-ESM_GLAC1D	127.5	42.6776	2.235	1265.34	17.3191	-14.9974	17.3191	-14.9974	1052.11	222.905	18.9358	78.1758	552.354	64.9578	552.354	64.9578
MPI-ESM_GLAC1D	131.25	42.6776	2.96189	1183.15	13.722	-12.9179	17.034	-12.9179	1023.64	196.66	16.5753	76.1013	517.034	54.3508	516.983	54.3508
MPI-ESM_GLAC1D	-123.75	42.6776	8.40931	670.75	1.72596	17.3635	17.3635	0.677128	971.001	171.425	0.469483	85.2945	487.324	4.43883	4.43883	502.332
MPI-ESM_GLAC1D	-120	42.6776	5.24672	914.796	-5.41076	17.1454	17.1454	-5.41076	749.991	129.526	0.370359	81.0761	376.793	4.7158	4.7158	376.793
MPI-ESM_GLAC1D	-116.25	42.6776	2.98451	1057.57	-7.68029	16.6044	16.6044	-9.17574	513.593	73.763	0.0456017	68.9213	215.514	5.75702	5.75702	214.081
MPI-ESM_GLAC1D	-112.5	42.6776	2.88376	1098.62	0.667464	16.8245	16.9259	-9.81766	378.838	74.0748	0.556726	74.0296	188.855	7.2474	46.1296	108.365
MPI-ESM_GLAC1D	-108.75	42.6776	4.27178	1069.48	8.52	4.3604	17.9539	-8.08199	359.554	74.37	8.71657	64.6646	174.68	39.1382	103.854	52.376
MPI-ESM_GLAC1D	-105	42.6776	5.86	1010.11	15.4115	-5.95503	18.6043	-5.95503	737.322	134.799	18.0931	69.6555	359.635	65.115	336.075	65.115
MPI-ESM_GLAC1D	-101.25	42.6776	7.15964	978.382	16.3295	-4.47912	19.4259	-4.47912	962.028	153.547	25.939	60.6261	438.16	91.0591	392.167	91.0591
MPI-ESM_GLAC1D	-97.5	42.6776	8.09274	986.479	12.7238	-3.95178	20.3868	-3.95178	1138.39	177.019	36.0259	50.6932	465.071	123.883	396.794	123.883
MPI-ESM_GLAC1D	-93.75	42.6776	8.78643	1014.02	13.5382	-4.40322	21.3517	-3.8398	1044.74	142.182	47.1423	35.95	386.012	146.562	303.625	159.558
MPI-ESM_GLAC1D	-90	42.6776	8.73711	1027.22	13.744	-4.6669	21.3393	-4.26037	1037.01	124.482	59.3318	26.6008	355.058	191.019	287.359	205.249
MPI-ESM_GLAC1D	-86.25	42.6776	7.67868	1021.5	13.0037	-3.49665	20.047	-5.44592	1223.31	140.348	72.9318	24.1398	408.703	234.427	348.707	261.994
MPI-ESM_GLAC1D	-82.5	42.6776	6.27439	1014.06	11.6645	-4.78246	18.42	-6.84761	1349.89	148.051	81.8114	22.6766	437.379	258.022	394.046	285.315
MPI-ESM_GLAC1D	-78.75	42.6776	5.81394	998.762	11.0825	-7.46703	17.7247	-7.15946	1279.41	143.437	71.2076	25.3791	422.727	234.721	387.131	253.274
MPI-ESM_GLAC1D	-75	42.6776	6.62611	977.745	11.5975	-6.34007	18.2957	-6.06115	1156.89	136.75	62.0137	29.0511	401.649	207.924	352.731	226.447
MPI-ESM_GLAC1D	-71.25	42.6776	7.97165	924.396	16.8073	-4.08226	19.1134	-3.90816	1187.22	144.212	66.1396	28.7339	415.312	222.006	373.888	240.291
MPI-ESM_GLAC1D	-7.5	42.6776	14.055	514.205	8.49939	20.9338	20.9338	8.49939	769.966	121.783	10.0186	62.8046	319.649	39.9239	39.9239	319.649
MPI-ESM_GLAC1D	-3.75	42.6776	12.8598	568.865	6.70903	20.3896	20.3896	6.70903	762.431	107.471	13.2457	53.9288	281.374	51.5521	51.5521	281.374
MPI-ESM_GLAC1D	15	38.9666	19.0687	715.316	16.9682	28.6043	28.6043	10.6687	279.206	49.6215	1.80272	54.4057	115.266	21.2374	21.2374	81.7546
MPI-ESM_GLAC1D	22.5	38.9666	16.296	886.051	10.2542	27.4254	28.0366	5.77609	302.14	45.8517	0.89608	58.3902	116.744	15.1177	18.7074	112.087
MPI-ESM_GLAC1D	30	38.9666	16.1181	813.401	6.27674	26.2236	26.81	6.27674	414.119	72.4268	0.251394	73.4417	193.587	5.63289	15.5336	193.587
MPI-ESM_GLAC1D	33.75	38.9666	14.7719	839.457	4.70447	25.2652	25.8758	4.70447	511.724	113.227	0.042622	93.5758	286.001	2.42364	4.86294	286.001
MPI-ESM_GLAC1D	37.5	38.9666	11.9329	976.63	0.389368	24.4234	24.9435	0.389368	639.25	139.652	0.0365493	93.4745	355.574	1.77805	8.47898	355.574
MPI-ESM_GLAC1D	41.25	38.9666	9.9072	1104.46	-3.33134	24.0009	24.5066	-3.33134	518.664	85.9071	0.0426974	78.6086	228.473	1.62808	17.4263	228.473
MPI-ESM_GLAC1D	45	38.9666	11.3499	1096.92	9.54832	24.9488	25.7247	-1.94787	234.95	49.1183	0.164151	81.5407	128.286	4.78716	8.03202	73.3815
MPI-ESM_GLAC1D	48.75	38.9666	14.5923	995.663	13.5919	27.3777	27.3777	2.15564	175.496	36.8865	0.0851685	74.8708	88.2148	2.37238	2.37238	47.792
MPI-ESM_GLAC1D	56.25	38.9666	17.004	909.368	5.26632	26.7633	28.2495	5.26632	52.4468	12.7301	4.63078e-12	89.1161	34.7476	0.00750599	0.0121831	34.7476
MPI-ESM_GLAC1D	60	38.9666	15.283	969.848	2.70708	25.5185	27.1388	2.70708	90.6963	23.7988	4.63078e-12	104.367	66.0782	0.0136541	0.0169734	66.0782
MPI-ESM_GLAC1D	63.75	38.9666	11.722	1010.49	-1.48954	24.1082	24.1082	-1.48954	258.35	56.4312	0.000452623	101.049	163.23	0.0697793	0.0697793	163.23
MPI-ESM_GLAC1D	67.5	38.9666	6.24395	1040.85	-0.530961	18.1604	19.0034	-7.51037	427.757	76.432	0.00418676	91.8313	223.205	0.104028	1.05325	210.405
MPI-ESM_GLAC1D	71.25	38.9666	0.716768	1051.94	-6.97107	13.3726	13.8979	-12.6386	451.924	94.8579	0.0403211	89.562	251.383	0.41943	7.98841	171.599
MPI-ESM_GLAC1D	75	38.9666	-2.25312	1063.48	-4.52459	10.8967	11.4539	-15.375	430.158	92.434	0.183161	83.5317	237.894	5.22379	35.6835	119.331
MPI-ESM_GLAC1D	78.75	38.9666	-1.66165	1083	-3.12811	11.5367	12.3764	-15.1022	284.217	64.9084	0.981098	89.0848	164.418	7.4696	43.5923	56.3319
MPI-ESM_GLAC1D	82.5	38.9666	0.642386	1090.51	-0.0219889	13.6279	14.7631	-13.0716	262.055	57.2594	1.22072	82.7207	144.78	8.10489	41.9456	52.9604
MPI-ESM_GLAC1D	86.25	38.9666	1.87058	1095.53	1.41616	14.7346	16.0821	-11.9199	197.708	41.539	0.723367	82.2109	111.75	3.46117	12.1386	55.0898
MPI-ESM_GLAC1D	90	38.9666	0.631807	1101.68	-6.12276	13.691	15.062	-12.8977	244.805	61.6352	1.44677	93.1628	143.819	5.09155	9.68036	70.0395
MPI-ESM_GLAC1D	93.75	38.9666	-1.29088	1100.52	-2.72251	6.03007	13.198	-14.5651	354.725	80.4792	6.66332	77.3484	190.052	24.0565	34.5324	93.6077
MPI-ESM_GLAC1D	97.5	38.9666	-1.10924	1083.66	-1.55129	-14.814	12.8764	-14.5501	378.953	65.1041	13.4214	48.3392	155.373	43.6666	108.167	55.3384
MPI-ESM_GLAC1D	101.25	38.9666	1.1655	1042.42	12.4644	-12.7261	14.1062	-12.2324	536.567	99.7955	7.75946	71.782	269.019	26.4901	266.876	36.0791
MPI-ESM_GLAC1D	105	38.9666	3.568	1035.6	14.3258	-10.6526	15.9825	-10.2005	664.939	130.171	8.04398	82.408	359.675	28.0316	351.733	36.1445
MPI-ESM_GLAC1D	108.75	38.9666	4.80287	1036.35	16.9539	-9.75934	16.9539	-9.36649	866.547	163.225	10.4217	83.8481	462.791	33.7558	462.791	41.2135
MPI-ESM_GLAC1D	112.5	38.9666	5.75404	1022.04	17.7924	-8.78408	17.7924	-8.33785	1132.52	212.637	14.8558	82.4713	604.514	46.301	604.514	53.9778
MPI-ESM_GLAC1D	116.25	38.9666	7.23549	1000.47	19.0346	-7.08617	19.0346	-6.67964	1171.78	237.139	15.3191	83.783	646.398	46.9464	646.398	53.8054
MPI-ESM_GLAC1D	120	38.9666	8.4142	1004.99	20.325	-5.58199	20.325	-5.58199	947.804	194.933	14.8354	80.5507	521.058	49.3179	521.058	49.3179
MPI-ESM_GLAC1D	127.5	38.9666	8.27129	1018.76	20.3673	-5.79943	20.4286	-5.79943	1027.52	214.687	15.5455	84.8892	577.585	51.4614	457.905	51.4614
MPI-ESM_GLAC1D	-123.75	38.9666	12.0929	674.315	5.46554	21.0803	21.0803	4.51762	572.133	111.033	0.0185575	98.354	324.805	0.234534	0.234534	328.263
MPI-ESM_GLAC1D	-120	38.9666	9.91794	908.022	0.994836	21.6832	21.6832	-0.535763	502.143	96.0546	3.77186e-05	97.3032	283.252	1.78017	1.78017	282.809
MPI-ESM_GLAC1D	-116.25	38.9666	7.06524	1083.2	-3.76949	20.8497	20.8497	-5.65881	407.656	76.0711	0.00275346	88.7832	217.225	2.9898	2.9898	211.853
MPI-ESM_GLAC1D	-112.5	38.9666	5.42819	1168.61	-6.2773	20.4695	20.4695	-8.17509	350.028	66.0983	0.0491096	78.3116	172.638	4.19415	4.19415	157.036
MPI-ESM_GLAC1D	-108.75	38.9666	6.5807	1179.33	-0.945024	21.9109	21.9109	-6.92639	230.058	41.0148	1.94556	60.6046	104.87	10.6197	10.6197	77.8849
MPI-ESM_GLAC1D	-105	38.9666	9.27878	1160.32	7.6909	-4.82054	24.3334	-3.96545	355.296	44.0517	18.8969	28.4299	124.711	58.3608	90.0679	65.0003
MPI-ESM_GLAC1D	-101.25	38.9666	12.0711	1124.73	16.7264	-0.94071	26.4799	-0.94071	676.805	105.162	25.5106	44.6192	270.36	89.1629	221.28	89.1629
MPI-ESM_GLAC1D	-97.5	38.9666	13.6282	1094.55	17.9093	-0.241115	27.4923	0.738977	876.582	134.289	39.2585	40.2028	346.062	119.509	236.29	130.424
MPI-ESM_GLAC1D	-93.75	38.9666	13.5978	1074.87	12.2801	-0.142157	27.0541	0.675826	942.155	125.292	57.837	29.1726	342.037	176.136	215.925	186.852
MPI-ESM_GLAC1D	-90	38.9666	12.277	1031.45	11.4337	12.9086	24.9194	-0.440059	1044.04	123.368	60.6074	24.3809	348.239	189.33	274.91	239.915
MPI-ESM_GLAC1D	-86.25	38.9666	10.5604	985.238	10.3166	11.1768	22.3777	-1.86259	1116.7	123.24	53.7569	27.2353	357.942	178.561	329.521	264.707
MPI-ESM_GLAC1D	-82.5	38.9666	9.57891	939.243	9.4116	10.4248	20.6915	-2.38863	1219.41	140.231	57.8416	28.7708	401.36	189.373	355.049	291.128
MPI-ESM_GLAC1D	-78.75	38.9666	10.1461	869.412	14.4158	0.286554	20.4422	-0.947221	1217.84	143.42	63.0381	29.0562	412.852	221.341	345.495	273.515
MPI-ESM_GLAC1D	-7.5	38.9666	15.6819	592.036	9.27609	23.6767	23.6767	9.27609	482.095	74.3789	4.10733	62.3296	206.444	25.2687	25.2687	206.444
MPI-ESM_GLAC1D	-3.75	38.9666	14.5936	663.363	8.07426	23.3505	23.3505	7.30929	477.27	61.6334	12.567	46.8428	175.978	45.1942	45.1942	169.871
MPI-ESM_GLAC1D	0	35.2556	16.9481	738.709	11.7464	26.8315	26.8315	8.34445	103.218	17.2782	0.544354	56.622	46.8549	6.51709	6.51709	35.7704
MPI-ESM_GLAC1D	3.75	35.2556	18.0452	692.874	16.2417	27.3054	27.3054	9.80994	75.3207	14.2914	0.265991	54.3635	34.2322	4.90194	4.90194	22.0606
MPI-ESM_GLAC1D	7.5	35.2556	18.9179	648.633	17.243	27.4929	27.4929	11.0762	65.1187	11.9681	0.181087	54.6972	29.2224	3.06441	3.06441	18.8453
MPI-ESM_GLAC1D	37.5	35.2556	15.2623	986.536	2.90564	27.1266	28.0099	2.90564	246.714	66.2786	0.00226311	113.651	170.156	0.258712	0.595765	170.156
MPI-ESM_GLAC1D	41.25	35.2556	13.9754	1177.38	-0.803341	27.9137	29.0906	-0.803341	150.767	40.027	0.000113156	111.183	107.456	0.0311933	0.0479403	107.456
MPI-ESM_GLAC1D	45	35.2556	14.6528	1221.05	-0.820919	28.7118	30.1101	-0.820919	79.6875	19.0582	0.000301749	93.5701	51.8461	0.00245171	0.01984	51.8461
MPI-ESM_GLAC1D	48.75	35.2556	15.5228	1133.53	9.2555	28.1585	29.6095	0.899784	71.8187	12.9897	0.00026403	82.5218	37.5479	0.0248188	0.0599725	36.9993
MPI-ESM_GLAC1D	52.5	35.2556	14.9586	1030.93	9.19039	26.1194	27.4871	1.39002	94.3734	18.4305	7.54371e-05	87.2936	52.5527	0.00433763	0.0535604	45.4679
MPI-ESM_GLAC1D	56.25	35.2556	13.8325	988.53	3.51958	24.2542	25.5704	0.63481	84.5938	15.9211	4.63078e-12	87.9892	46.3491	0.00196137	0.0258372	45.9997
MPI-ESM_GLAC1D	60	35.2556	13.0701	996.819	2.7227	23.4599	24.7482	-0.352169	90.7374	18.9669	4.3583e-12	92.0021	52.2349	0.00120699	0.0099577	54.7853
MPI-ESM_GLAC1D	63.75	35.2556	11.2249	1018.55	0.511764	22.0699	23.2534	-2.54748	116.911	24.4636	4.3583e-12	94.5363	65.7336	0.00158418	0.0022254	62.8001
MPI-ESM_GLAC1D	67.5	35.2556	7.36797	1052.09	0.995081	19.0439	20.0678	-6.78576	196.614	43.5228	4.63078e-12	97.7075	113.912	0.018633	0.0893176	89.107
MPI-ESM_GLAC1D	71.25	35.2556	2.65899	1103.28	-4.87666	15.3876	16.2319	-11.8209	299.191	69.817	0.00282889	98.6358	176.633	0.179767	0.922219	130.782
MPI-ESM_GLAC1D	75	35.2556	-1.16849	1114.66	-9.31872	12.4124	13.0821	-14.9492	423.907	92.563	0.0873185	92.8747	244.969	1.84349	7.27878	179.707
MPI-ESM_GLAC1D	78.75	35.2556	-3.43753	1138.09	-11.6351	10.8674	11.5105	-17.1471	431.781	83.7823	0.800237	81.232	229.271	6.72183	23.2474	156.177
MPI-ESM_GLAC1D	82.5	35.2556	-4.22138	1155.57	-7.20298	4.57044	10.9929	-18.0944	332.334	65.84	0.922747	74.8865	178.62	16.3847	43.3269	86.6887
MPI-ESM_GLAC1D	86.25	35.2556	-3.9831	1143.24	-6.27394	-3.26981	10.8699	-17.8938	259.329	49.2871	1.12198	68.7918	130.107	19.1904	66.0041	44.2493
MPI-ESM_GLAC1D	90	35.2556	-3.92304	1095.45	-5.60011	-3.13114	9.96235	-17.5019	282.12	51.5816	2.87276	66.4769	131.514	20.0956	87.6363	42.7651
MPI-ESM_GLAC1D	93.75	35.2556	-4.26582	1001.69	5.43232	-3.387	8.03591	-17.0976	430.174	77.6062	6.36117	73.7923	216	27.4361	187.04	46.9356
MPI-ESM_GLAC1D	97.5	35.2556	-3.46113	883.717	7.09451	-15.661	7.09451	-15.1406	784.689	158.755	9.51824	82.9575	424.406	29.7795	424.406	38.0861
MPI-ESM_GLAC1D	101.25	35.2556	-0.665556	842.398	9.22927	-11.983	9.22927	-11.983	1332.42	220.891	18.7811	65.1203	584.692	75.8073	584.692	75.8073
MPI-ESM_GLAC1D	105	35.2556	3.57077	834.153	13.5502	-7.56636	13.5502	-7.56636	1753.56	261.773	36.5301	53.5468	684.903	147.439	684.903	147.439
MPI-ESM_GLAC1D	108.75	35.2556	6.43064	916.651	17.4226	-5.98303	17.4226	-5.98303	1786.4	267.269	44.1311	51.8417	685.695	166.711	685.695	166.711
MPI-ESM_GLAC1D	112.5	35.2556	8.27943	973.625	19.9024	-5.06533	19.9024	-5.11779	1732.88	262.971	50.1241	48.674	678.73	167.35	678.73	192.784
MPI-ESM_GLAC1D	116.25	35.2556	10.4052	936.697	21.6225	-2.54125	21.6225	-2.52665	1456.94	221.308	45.9821	49.8104	599.2	158.704	599.2	181.734
MPI-ESM_GLAC1D	135	35.2556	14.4472	740.818	19.7832	5.65602	24.0081	4.82361	1219.72	225.523	30.6164	63.9982	561.485	108.187	459.83	116.287
MPI-ESM_GLAC1D	-120	35.2556	16.3924	789.606	7.17843	26.1902	26.4358	7.17843	202.292	44.5571	0.00181049	105.274	128.18	0.722952	4.26608	128.18
MPI-ESM_GLAC1D	-116.25	35.2556	14.4376	974.145	3.08663	26.7442	26.7442	3.08663	226.418	48.0758	0.00512972	97.5409	138.992	0.103198	0.103198	138.992
MPI-ESM_GLAC1D	-112.5	35.2556	11.9922	1102.77	-0.669226	26.2892	26.2892	-0.669226	291.711	56.8203	0.0234987	85.146	159.255	0.209338	0.209338	159.255
MPI-ESM_GLAC1D	-108.75	35.2556	11.0823	1165.05	-2.11584	26.4734	26.4734	-2.11584	306.054	54.159	0.206886	76.2722	144.715	1.65694	1.65694	144.715
MPI-ESM_GLAC1D	-105	35.2556	12.9798	1158.45	12.2282	24.6791	28.1824	-0.307898	286.587	47.3075	7.95119	49.5977	109.904	26.1337	28.1578	86.2917
MPI-ESM_GLAC1D	-101.25	35.2556	16.2716	1100.36	15.7256	30.2625	30.2625	3.22791	452.743	62.875	25.6358	24.0201	135.77	98.1955	98.1955	100.895
MPI-ESM_GLAC1D	-97.5	35.2556	18.0613	1027.56	22.9692	30.7325	30.7325	5.56645	679.156	95.9028	27.0307	33.7285	235.011	122.785	122.785	157.969
MPI-ESM_GLAC1D	-93.75	35.2556	17.1266	970.851	16.5835	28.9969	28.9969	5.30929	881.298	103.826	37.5623	28.9785	295.152	136.284	136.284	260.684
MPI-ESM_GLAC1D	-90	35.2556	14.5695	904.257	9.79456	14.9047	25.3972	3.44731	1212.85	132.435	62.7294	21.4355	370.56	212.235	312.532	343.814
MPI-ESM_GLAC1D	-86.25	35.2556	13.1933	872.761	21.6595	13.3975	23.4051	2.34249	1217.42	159.924	52.1577	32.2959	422.405	181.386	418.368	281.002
MPI-ESM_GLAC1D	-82.5	35.2556	13.8432	827.47	21.6068	3.93955	23.3556	3.45317	1095	149.508	42.7461	39.9313	419.908	172.229	410.53	225.037
MPI-ESM_GLAC1D	-78.75	35.2556	15.616	727.013	22.1361	7.29567	24.0868	6.51697	1079.92	139.928	40.7446	36.6853	397.458	162.189	312.185	218.644
MPI-ESM_GLAC1D	0	31.5445	18.5016	890.481	10.0144	28.6194	30.0886	7.79952	17.2514	3.27605	0.00626128	52.2549	8.87194	0.224086	0.24683	8.61307
MPI-ESM_GLAC1D	3.75	31.5445	18.2244	890.098	7.4727	28.0445	29.7143	7.4727	17.8988	3.14863	0.0238381	49.0645	8.74599	0.179503	0.324531	8.74599
MPI-ESM_GLAC1D	7.5	31.5445	17.6748	850.918	7.21359	28.5125	28.5125	7.21359	20.4457	4.35861	0.000754371	57.5527	10.5241	0.0976156	0.0976156	10.5241
MPI-ESM_GLAC1D	11.25	31.5445	17.7778	771.335	7.53688	27.4103	27.4103	8.04757	29.4981	6.84502	0.00158418	66.5974	18.9785	0.393669	0.393669	15.6135
MPI-ESM_GLAC1D	15	31.5445	18.4432	692.925	9.51958	26.9506	26.9506	9.51958	17.978	3.61638	4.63078e-12	54.947	9.3066	0.0187461	0.0187461	9.3066
MPI-ESM_GLAC1D	18.75	31.5445	19.2088	639.69	10.9395	27.1446	27.1446	10.9395	10.3432	2.23456	0.000150874	43.3459	5.89639	0.00814721	0.00814721	5.89639
MPI-ESM_GLAC1D	22.5	31.5445	19.3587	593.774	11.7566	26.8556	26.8556	11.7566	5.85879	1.19206	0.00132015	31.0137	3.19288	0.0089393	0.0089393	3.19288
MPI-ESM_GLAC1D	33.75	31.5445	19.1028	688.521	9.96294	27.0465	27.4806	9.96294	72.79	22.0437	0.000377186	117.559	55.9646	0.0231969	0.0299108	55.9646
MPI-ESM_GLAC1D	37.5	31.5445	18.7801	909.939	6.82882	29.066	29.9995	6.82882	38.1337	11.8038	4.3583e-12	104.105	30.462	0.00241399	0.00607269	30.462
MPI-ESM_GLAC1D	41.25	31.5445	18.6225	1082.08	4.43494	31.9643	31.9643	4.43494	16.3765	4.67597	4.63078e-12	70.5821	12.2729	0.000150874	0.000150874	12.2729
MPI-ESM_GLAC1D	45	31.5445	19.3309	1122.12	4.54627	33.1043	33.1043	4.54627	15.3638	2.85447	4.63078e-12	57.021	8.54507	0.0242908	0.0242908	8.54507
MPI-ESM_GLAC1D	48.75	31.5445	18.8299	1078.04	7.54432	31.9903	31.9903	4.49744	27.5354	5.10128	0.000150874	65.963	14.2236	0.177315	0.177315	13.1715
MPI-ESM_GLAC1D	52.5	31.5445	16.3027	1045.19	10.1852	28.8634	28.8634	2.22986	70.0648	15.77	3.77186e-05	83.2984	37.4218	0.29941	0.29941	30.2227
MPI-ESM_GLAC1D	56.25	31.5445	14.6707	1060.69	3.50786	27.0899	27.0899	0.240279	64.9305	14.9118	7.54371e-05	84.8117	34.8317	0.0308161	0.0308161	30.0475
MPI-ESM_GLAC1D	60	31.5445	15.2975	1095.75	4.02609	27.8777	27.8777	0.321008	45.1855	9.40015	4.63078e-12	81.1442	23.8197	0.00143331	0.00143331	22.4202
MPI-ESM_GLAC1D	63.75	31.5445	15.977	1097.7	0.927779	28.6297	28.6297	0.927779	44.4969	9.81354	4.3583e-12	82.1248	23.7627	0.000188593	0.000188593	23.7627
MPI-ESM_GLAC1D	67.5	31.5445	15.379	1066.9	0.791711	27.8204	27.8204	0.791711	64.1959	12.8315	4.3583e-12	85.8479	34.9493	0.0196137	0.0196137	34.9493
MPI-ESM_GLAC1D	71.25	31.5445	13.7606	1032.03	-0.183549	24.6155	25.8797	-0.183549	147.671	31.3225	0.0254977	93.4917	82.7296	0.410755	0.464693	82.7296
MPI-ESM_GLAC1D	75	31.5445	10.3916	1010.04	-3.10282	22.3959	22.3959	-3.10282	297.981	63.7372	0.861153	93.646	180.287	5.1737	5.1737	180.287
MPI-ESM_GLAC1D	78.75	31.5445	4.04017	1054.66	-7.69722	14.5957	16.8146	-9.71805	409.761	75.4364	3.56794	79.8899	212.231	23.8638	26.6643	225.019
MPI-ESM_GLAC1D	82.5	31.5445	-2.33092	1063.63	-13.8737	-0.895463	10.8862	-15.6901	473.536	78.6136	11.2881	52.5691	167.165	68.2835	138.035	151.176
MPI-ESM_GLAC1D	86.25	31.5445	-4.84817	1013.77	7.30284	-3.62203	7.30284	-17.9121	613.228	192.694	16.1728	111.579	372.449	53.4371	372.449	77.6662
MPI-ESM_GLAC1D	90	31.5445	-4.03291	925.285	6.36274	-14.5084	6.36274	-16.401	660.031	234.057	8.33728	141.962	506.957	35.3319	506.957	42.5109
MPI-ESM_GLAC1D	93.75	31.5445	-2.46227	811.209	6.10362	-12.1757	6.10362	-13.763	737.8	221.959	6.83033	123.832	542.857	27.3442	542.857	34.002
MPI-ESM_GLAC1D	97.5	31.5445	-0.664743	681.836	6.4643	-10.2428	6.4643	-10.2428	928.115	202.486	7.84184	101.901	583.96	25.0224	583.96	25.0224
MPI-ESM_GLAC1D	101.25	31.5445	2.38555	619.03	8.33401	-6.01493	9.20714	-6.01493	1623.15	274.482	24.8804	67.7951	739.61	86.8862	710.105	86.8862
MPI-ESM_GLAC1D	105	31.5445	6.43405	657.144	10.3384	-2.66039	14.1961	-2.38993	2311.93	328.669	75.5094	42.6147	880.97	238.097	777.466	282.467
MPI-ESM_GLAC1D	108.75	31.5445	9.1445	825.263	14.1105	-1.86546	18.9246	-2.13407	2249.87	336.341	82.7753	43.2759	900.478	276.709	727.308	323.808
MPI-ESM_GLAC1D	112.5	31.5445	10.2902	959.639	16.1502	-0.0344096	21.5906	-3.00581	2146.92	303.959	81.2884	43.9429	861.037	279.42	685.183	373.738
MPI-ESM_GLAC1D	116.25	31.5445	11.8123	924.566	17.0806	1.79111	22.7599	-0.998002	1961.59	271.679	68.0773	45.5889	767.022	256.919	646.516	381.926
MPI-ESM_GLAC1D	120	31.5445	14.055	812.135	17.6704	5.68239	23.7364	3.00525	1640.97	236.884	46.902	47.9945	644.039	204.037	567.785	322.818
MPI-ESM_GLAC1D	-116.25	31.5445	21.1067	726.596	12.2442	26.9616	30.1734	12.2442	133.326	29.888	0.0165962	87.7871	84.412	0.276774	19.1965	84.412
MPI-ESM_GLAC1D	-112.5	31.5445	19.6632	885.404	9.19601	27.571	30.6707	9.19601	192.14	38.5397	0.0294205	85.4692	109.327	0.304044	0.632427	109.327
MPI-ESM_GLAC1D	-108.75	31.5445	16.8349	992.514	5.34184	26.8555	29.8386	5.34184	310.186	54.6504	0.138239	83.3059	153.284	1.96649	5.04942	153.284
MPI-ESM_GLAC1D	-105	31.5445	15.6193	1002.8	14.5655	26.5345	28.6544	3.81124	386.35	73.9109	2.72727	69.8011	154.911	13.7371	31.9029	147.283
MPI-ESM_GLAC1D	-101.25	31.5445	18.0989	927.296	17.4073	29.5255	29.5255	6.66541	417.812	52.9519	15.6839	31.2581	133.706	61.1093	61.1093	122.285
MPI-ESM_GLAC1D	-97.5	31.5445	20.8812	812.377	21.1968	30.0907	30.4357	10.558	560.806	89.9089	7.02289	47.3834	214.491	57.1764	60.8353	166.052
MPI-ESM_GLAC1D	-93.75	31.5445	20.483	729.719	13.2403	29.0463	29.0463	11.3034	776.06	94.3338	40.8395	27.6521	268.488	134.536	134.536	260.373
MPI-ESM_GLAC1D	-90	31.5445	17.5927	649.597	25.0873	10.0307	25.0873	9.41476	1220.59	162.682	50.3983	30.8539	409.341	240.013	409.341	326.99
MPI-ESM_GLAC1D	-86.25	31.5445	16.6406	625.607	23.6987	9.1622	23.6987	8.77088	1320.93	188.617	43.6637	42.2246	519.07	185.95	519.07	255.901
MPI-ESM_GLAC1D	-82.5	31.5445	18.3188	606.578	23.7884	11.172	25.1038	10.5606	1127.64	184.396	32.3185	50.0146	473.553	131.522	385.344	182.248
MPI-ESM_GLAC1D	-7.5	31.5445	20.6963	677.616	13.9232	29.2566	29.3316	12.5215	60.7843	10.5689	0.895703	61.5971	30.0616	4.94656	4.99941	30.6704
MPI-ESM_GLAC1D	-3.75	31.5445	19.4658	833.903	11.3204	29.4631	30.336	9.47205	38.7838	7.78553	0.279155	67.5182	21.2477	1.36405	1.38156	22.1086
MPI-ESM_GLAC1D	0	27.8334	21.7506	911.338	9.19378	30.9332	32.9077	10.183	2.27538	0.54416	7.54371e-05	16.8586	1.03394	0.000565778	0.00562007	1.05363
MPI-ESM_GLAC1D	3.75	27.8334	20.8707	912.47	9.25395	29.7288	31.7748	9.25395	2.10289	0.447229	4.3583e-12	13.6149	1.11813	0.0237627	0.0987472	1.11813
MPI-ESM_GLAC1D	7.5	27.8334	19.8512	887.618	8.4408	30.2429	30.2429	8.4408	2.78839	0.818419	4.63078e-12	22.3596	1.66724	0.00660075	0.00660075	1.66724
MPI-ESM_GLAC1D	11.25	27.8334	19.5748	851.365	8.49028	27.4319	29.3504	8.49028	3.53646	0.924859	4.3583e-12	26.288	2.14883	0.0311555	0.0327397	2.14883
MPI-ESM_GLAC1D	15	27.8334	19.6958	828.775	8.10524	27.3173	29.1245	8.85291	3.87762	0.998229	4.63078e-12	28.8438	2.69024	0.00286661	0.0205566	2.10157
MPI-ESM_GLAC1D	18.75	27.8334	19.5993	794.829	8.47047	28.6941	28.6941	9.15109	3.47675	1.03858	4.3583e-12	28.5182	2.98825	0.00331923	0.00331923	2.21838
MPI-ESM_GLAC1D	22.5	27.8334	18.9603	718.71	8.81032	27.1733	27.1733	9.29627	2.59489	0.832676	4.3583e-12	24.5853	2.3722	1.38758e-11	1.38758e-11	1.74388
MPI-ESM_GLAC1D	26.25	27.8334	18.6375	640.926	9.41318	25.7866	25.7866	9.7546	6.40073	1.88167	4.63078e-12	43.5006	5.2135	0.00595953	0.00595953	3.98433
MPI-ESM_GLAC1D	30	27.8334	19.4401	638.637	10.5769	26.0302	26.5548	10.5769	7.85316	2.22064	3.77186e-05	48.8143	5.51615	0.0160304	0.0268556	5.51615
MPI-ESM_GLAC1D	33.75	27.8334	20.7182	735.832	10.7898	28.5439	29.3002	10.7898	4.03766	1.12722	4.3583e-12	31.6319	2.91632	0.000188593	0.00177277	2.91632
MPI-ESM_GLAC1D	37.5	27.8334	21.2711	872.816	16.6448	30.8056	31.7553	9.67973	3.03371	0.751052	4.63078e-12	21.8425	1.89903	0.0172374	0.0183689	1.50731
MPI-ESM_GLAC1D	41.25	27.8334	21.5148	978.637	16.5556	31.1914	33.2169	8.39718	4.24862	1.05299	4.63078e-12	25.3336	2.24668	0.0139883	0.165622	1.95627
MPI-ESM_GLAC1D	45	27.8334	22.4085	1002.74	11.9082	32.4362	34.3413	8.78715	6.19773	1.68768	4.88674e-12	33.5559	3.18391	0.0596278	0.264897	3.45291
MPI-ESM_GLAC1D	48.75	27.8334	22.3011	962.582	16.6025	33.9051	33.9051	9.1921	10.7395	1.89816	0.0020368	38.7832	5.45857	0.195873	0.195873	4.01914
MPI-ESM_GLAC1D	56.25	27.8334	20.5724	910.97	15.1279	29.8353	31.1707	7.99353	53.3815	9.10086	0.366549	49.7516	20.3889	5.15212	6.26536	9.97007
MPI-ESM_GLAC1D	60	27.8334	21.4813	911.91	16.9026	31.7482	31.7482	8.72986	37.5071	5.30489	0.773759	38.4535	12.0277	3.66711	3.66711	10.0981
MPI-ESM_GLAC1D	63.75	27.8334	22.3948	878.137	23.6225	23.0349	32.226	10.0144	37.0078	5.54173	1.29993	32.1925	13.1529	6.19912	6.84826	10.2077
MPI-ESM_GLAC1D	67.5	27.8334	23.0234	800.812	30.8844	13.6414	31.81	11.5359	72.9766	13.5434	2.88467	50.5858	34.8584	12.4871	27.3154	12.8549
MPI-ESM_GLAC1D	71.25	27.8334	23.6691	749.869	23.7614	26.0776	31.5521	12.9161	150.096	30.9635	1.9577	64.2825	70.2267	9.15728	25.1531	27.089
MPI-ESM_GLAC1D	75	27.8334	22.2247	746.713	21.8168	29.4972	30.4772	11.7728	231.357	37.9183	0.684813	58.7802	88.6022	11.7831	35.5229	73.8226
MPI-ESM_GLAC1D	78.75	27.8334	16.0744	726.948	20.9762	18.8504	24.3705	6.04627	585.252	210.922	0.933982	127.222	405.229	18.7625	237.79	103.349
MPI-ESM_GLAC1D	82.5	27.8334	8.31866	682.171	13.3101	10.284	16.2585	-0.866492	1101.89	402.026	2.63837	145.265	867.914	28.2451	461.085	104.935
MPI-ESM_GLAC1D	86.25	27.8334	4.70489	614.32	9.42928	6.48387	11.6244	-3.59631	1280.44	383.007	11.4937	120.764	918.297	51.7249	516.485	105.555
MPI-ESM_GLAC1D	90	27.8334	4.66761	545.188	9.88031	2.80563	10.4616	-2.9368	1455.33	355.213	25.7705	96.1721	879.334	89.2855	662.713	124.538
MPI-ESM_GLAC1D	93.75	27.8334	5.14467	499.932	9.88031	0.141321	10.1406	-2.00907	1449.6	293.463	33.7487	81.4514	794.347	113.168	682.306	120.663
MPI-ESM_GLAC1D	97.5	27.8334	5.61195	457.785	10.2195	-0.727169	10.2195	-0.727169	1632.14	301.172	24.0604	80.3738	864.688	78.3669	864.688	78.3669
MPI-ESM_GLAC1D	101.25	27.8334	7.56312	434.213	12.3308	1.88221	12.3308	1.88221	1875.96	290.806	43.1952	59.1921	819.573	146.715	819.573	146.715
MPI-ESM_GLAC1D	105	27.8334	10.5265	508.436	14.0994	3.39105	16.392	3.77609	2012.91	285.51	82.7625	39.9011	776.963	281.669	647.596	337.607
MPI-ESM_GLAC1D	108.75	27.8334	12.5504	683.87	17.2225	4.85947	20.2996	2.97726	1945.07	308.055	65.4829	50.9146	837.598	238.677	557.617	353.548
MPI-ESM_GLAC1D	112.5	27.8334	13.2244	806.111	14.5457	4.13421	22.2657	1.76827	1953.86	293.783	51.8559	54.2456	832.252	230.596	570.707	393.905
MPI-ESM_GLAC1D	116.25	27.8334	14.2962	766.021	15.228	5.59515	23.0431	3.52023	1956.47	268.976	47.2389	50.2822	777.777	237.037	602.31	426.152
MPI-ESM_GLAC1D	120	27.8334	16.6847	652.013	20.145	9.70973	24.2677	7.61267	1917	274.759	41.5944	49.2195	759.217	223.274	669.509	396.46
MPI-ESM_GLAC1D	-112.5	27.8334	24.0167	560.966	16.7963	28.1048	30.7932	16.7963	202.181	47.7456	0.0419808	95.2095	112.574	0.600097	52.0946	112.574
MPI-ESM_GLAC1D	-108.75	27.8334	20.5674	661.675	25.0086	24.4158	28.8738	12.2572	400.452	119.536	0.38148	95.7149	200.322	8.17693	53.8914	144.775
MPI-ESM_GLAC1D	-105	27.8334	16.5545	710.639	19.7592	22.2212	25.284	7.78781	731.329	138.364	3.70185	64.3654	310.079	33.0154	183.684	230.849
MPI-ESM_GLAC1D	-101.25	27.8334	17.9163	681.875	9.22531	25.9285	25.9285	9.22531	587.023	62.2451	32.628	18.4458	180.032	122.5	122.5	180.032
MPI-ESM_GLAC1D	-97.5	27.8334	22.2308	578.867	22.2996	28.8909	28.95	14.722	651.564	113.074	6.42287	56.1274	280.787	50.6164	69.1236	193.562
MPI-ESM_GLAC1D	-11.25	27.8334	23.8694	641.666	15.8464	29.1849	31.926	15.8464	13.8714	2.79155	0.205378	37.4435	7.90826	1.76421	2.11669	7.90826
MPI-ESM_GLAC1D	-7.5	27.8334	23.3108	822.825	13.0111	33.8204	33.8204	13.0111	6.62025	2.16542	0.000301749	44.3901	5.43057	0.0328152	0.0328152	5.43057
MPI-ESM_GLAC1D	-3.75	27.8334	22.4865	892.594	14.0176	31.9592	33.7143	11.2312	2.70325	0.924067	0.000113156	21.5398	1.69361	0.00158418	0.00580866	2.24414
MPI-ESM_GLAC1D	0	24.1223	25.5123	803.498	27.3068	33.0256	34.8484	14.9974	0.767161	0.538918	4.3583e-12	14.4446	0.649069	7.54371e-05	0.000113156	0.0290433
MPI-ESM_GLAC1D	3.75	24.1223	23.7474	785.865	26.1792	32.532	32.532	13.2748	0.469335	0.263157	4.63078e-12	7.14727	0.37659	7.54371e-05	7.54371e-05	0.030288
MPI-ESM_GLAC1D	7.5	24.1223	21.8468	760.58	24.659	30.1271	30.1823	11.6348	0.566423	0.292024	4.3583e-12	8.16939	0.493819	0.000414904	0.109643	0.0528437
MPI-ESM_GLAC1D	11.25	24.1223	20.7949	754.549	18.6227	27.0035	29.0768	10.6374	0.686104	0.495441	4.3583e-12	13.1807	0.522415	1.38104e-11	0.00900946	0.125226
MPI-ESM_GLAC1D	15	24.1223	20.0377	770.323	23.4259	26.3557	28.416	9.69015	0.844333	0.334081	4.3583e-12	9.25698	0.40469	1.38104e-11	0.0684916	0.35844
MPI-ESM_GLAC1D	18.75	24.1223	19.1056	765.388	7.90081	25.4111	27.3255	8.77218	1.38695	0.47499	4.3583e-12	15.8706	1.42271	0.000150874	0.0116875	1.00995
MPI-ESM_GLAC1D	22.5	24.1223	18.3965	722.267	7.66058	25.7748	25.9929	8.4408	2.19598	0.759992	4.3583e-12	22.3607	1.9347	7.54371e-05	0.000673654	1.3475
MPI-ESM_GLAC1D	26.25	24.1223	18.8693	692.22	8.44899	25.9181	25.972	9.14848	2.12265	0.676559	4.3583e-12	21.8195	1.89728	1.38758e-11	0.00146574	1.38156
MPI-ESM_GLAC1D	30	24.1223	20.9334	703.424	18.2933	27.413	28.5528	11.0599	0.993435	0.361313	4.3583e-12	11.9108	0.521623	3.77186e-05	3.77186e-05	0.627524
MPI-ESM_GLAC1D	33.75	24.1223	24.0734	733.7	16.1641	31.2774	32.685	14.0183	0.593165	0.265884	4.63078e-12	7.21354	0.33638	0.000221031	0.0939947	0.105612
MPI-ESM_GLAC1D	41.25	24.1223	24.6198	869.226	30.8126	29.5662	34.7859	12.7168	5.0882	1.18538	0.000296468	29.8062	3.06328	0.193875	1.64313	0.696775
MPI-ESM_GLAC1D	45	24.1223	23.7156	956.284	33.8199	29.5773	34.6804	10.39	10.006	4.24228	0.00323852	63.1687	6.75023	0.390464	2.59507	1.30917
MPI-ESM_GLAC1D	48.75	24.1223	23.9985	931.431	33.9469	10.9415	34.7755	10.9415	15.8955	4.32602	0.176711	64.3915	10.8601	0.970914	6.71081	0.970914
MPI-ESM_GLAC1D	71.25	24.1223	25.4362	394.659	26.1206	25.443	30.2166	19.7155	552.494	208.544	0.341428	138.807	406.534	2.65129	36.5135	5.46836
MPI-ESM_GLAC1D	75	24.1223	25.7446	508.472	26.206	30.4181	32.7772	19.3991	550.708	184.663	0.12605	134.711	422.757	0.786591	25.7839	14.4954
MPI-ESM_GLAC1D	78.75	24.1223	22.7952	591.025	23.5803	27.8589	30.977	15.7136	876.159	286.162	0.324752	141.91	715.6	5.86487	54.0849	39.2951
MPI-ESM_GLAC1D	82.5	24.1223	19.1098	525.162	20.6337	23.0451	25.9256	12.4786	1117.51	377.599	4.63969	140.599	873.122	21.9625	122.442	53.8777
MPI-ESM_GLAC1D	86.25	24.1223	17.5016	396.043	20.267	17.4502	22.3006	12.2689	1311.45	398.779	13.9753	123.404	934.624	48.785	248.991	56.6498
MPI-ESM_GLAC1D	90	24.1223	16.8283	282.126	18.8334	14.351	19.6723	12.7911	1271.99	279.693	24.573	87.9454	750.524	83.7872	349.187	87.447
MPI-ESM_GLAC1D	93.75	24.1223	14.8668	305.926	17.6179	11.879	17.6179	10.446	1088.17	229.357	28.5775	80.845	605.394	92.6688	605.394	99.5456
MPI-ESM_GLAC1D	97.5	24.1223	12.9236	345.443	16.2729	9.72921	16.2729	8.20903	1308.59	267.706	34.335	77.0894	692.821	119.581	692.821	129.102
MPI-ESM_GLAC1D	101.25	24.1223	13.0252	385.716	16.8159	7.24261	16.8731	7.24261	1377.34	267.224	33.9938	76.4288	730.268	122.198	624.621	122.198
MPI-ESM_GLAC1D	105	24.1223	14.7975	448.161	19.4988	9.01312	19.4988	8.91346	1490.25	234.353	38.1201	56.5978	634.071	146.386	634.071	220.127
MPI-ESM_GLAC1D	108.75	24.1223	16.6522	540.064	20.7576	10.1082	22.4357	9.06385	1676.74	251.589	26.7407	59.3438	663.219	127.856	652.939	236.742
MPI-ESM_GLAC1D	112.5	24.1223	17.812	571.785	21.7759	11.1056	23.9526	9.55213	1490.19	234.128	19.6962	60.6185	595.206	113.976	558.242	219.967
MPI-ESM_GLAC1D	116.25	24.1223	18.9767	501.418	24.4799	13.3152	24.4799	11.7631	1575.12	229.612	32.0959	52.5252	587.353	154.847	587.353	266.061
MPI-ESM_GLAC1D	-105	24.1223	17.296	406.321	19.7678	18.7488	22.3334	11.9909	1247.93	231.126	29.515	64.9624	624.272	117.813	357.232	276.915
MPI-ESM_GLAC1D	-101.25	24.1223	16.8523	428.425	20.9884	18.6981	21.5938	11.1159	1027.26	166.054	49.6402	41.2782	414.138	178.116	366.911	256.807
MPI-ESM_GLAC1D	-15	24.1223	25.7902	589.802	33.3336	24.4416	33.3336	18.4564	6.19358	1.93474	0.0148306	39.3005	3.80199	0.0752942	3.80199	1.26931
MPI-ESM_GLAC1D	-11.25	24.1223	26.8081	834.242	19.2409	17.0177	37.4304	16.5951	2.47615	0.805027	0.00053334	19.4084	1.31484	0.908932	0.747054	1.70088
MPI-ESM_GLAC1D	-7.5	24.1223	26.3118	895.335	18.2572	15.5932	37.6264	15.2637	1.48412	0.304087	0.00143859	9.48681	0.655555	0.399769	0.402495	0.666072
MPI-ESM_GLAC1D	-3.75	24.1223	26.1758	842.851	32.0226	34.4312	36.4396	15.4707	1.22152	0.416596	4.3583e-12	14.2355	0.909661	0.000188593	0.396686	0.103877
MPI-ESM_GLAC1D	0	20.4112	28.4088	712.79	36.2032	18.9603	36.2032	18.9603	1.65638	0.664865	4.29991e-05	20.4035	0.829544	0.00143331	0.829544	0.00143331
MPI-ESM_GLAC1D	3.75	20.4112	25.5538	726.761	31.7095	15.905	33.3276	15.905	0.940515	0.567219	4.29991e-05	15.0832	0.779645	0.000867527	0.172789	0.000867527
MPI-ESM_GLAC1D	7.5	20.4112	22.8934	726.285	25.9077	13.3093	30.601	13.3093	0.67807	0.612104	4.63078e-12	16.6284	0.674906	0.000980683	0.00135787	0.000980683
MPI-ESM_GLAC1D	11.25	20.4112	21.8882	724.478	28.1678	12.3757	29.6075	12.3757	1.37122	0.765455	3.88502e-05	23.5817	1.33992	0.00196137	0.0244039	0.00196137
MPI-ESM_GLAC1D	15	20.4112	21.4765	713.795	24.7222	10.8963	28.9838	12.0352	0.992982	0.530091	7.54371e-05	17.7088	0.984161	0.00132128	0.00267802	0.00132015
MPI-ESM_GLAC1D	18.75	20.4112	20.7479	681.083	24.1401	19.4151	27.6974	11.6205	0.0817391	0.0347837	4.88674e-12	1.20237	0.0648084	0.00203077	0.00482798	0.00991998
MPI-ESM_GLAC1D	22.5	20.4112	20.0836	656.196	10.1619	26.713	26.713	11.2045	0.116553	0.0390082	3.77186e-05	1.40942	0.0551834	0.000565778	0.000565778	0.0258749
MPI-ESM_GLAC1D	26.25	20.4112	20.6854	672.676	23.3595	19.9385	27.7547	11.4981	0.20621	0.133418	4.88674e-12	3.71924	0.164348	0.00161586	0.0241022	0.0144085
MPI-ESM_GLAC1D	30	20.4112	23.1668	689.085	30.8946	13.5997	30.8946	13.5997	0.470089	0.24336	4.82128e-12	7.89908	0.245397	0.000716653	0.245397	0.000716653
MPI-ESM_GLAC1D	33.75	20.4112	27.1489	649.376	32.1434	17.9718	34.7547	18.0651	1.36213	0.835994	4.88674e-12	21.7624	1.09173	0.000453755	0.85342	0.00237627
MPI-ESM_GLAC1D	41.25	20.4112	27.1063	689.368	34.6396	17.2823	35.0138	17.4089	17.491	11.8715	3.77186e-05	136.502	15.4011	0.0505063	14.3212	0.175391
MPI-ESM_GLAC1D	45	20.4112	24.0314	827.909	29.6466	12.2976	33.3771	12.2976	18.5816	6.83698	0.0291135	85.1505	14.5407	0.198664	5.86003	0.198664
MPI-ESM_GLAC1D	48.75	20.4112	23.6709	844.341	32.3648	11.6192	33.2026	11.6192	44.0351	18.1385	0.0405475	121.556	36.7582	0.14763	19.2339	0.14763
MPI-ESM_GLAC1D	52.5	20.4112	25.1969	679.949	31.9182	15.3314	32.728	15.3314	30.2742	12.383	0.0696662	105.18	23.4392	0.322079	11.4588	0.322079
MPI-ESM_GLAC1D	56.25	20.4112	25.7674	477.347	29.9846	18.7865	30.7469	18.7865	21.0684	9.07365	0.0241033	94.3308	15.7851	0.172676	7.6551	0.172676
MPI-ESM_GLAC1D	71.25	20.4112	23.93	233.664	23.3069	24.7073	27.2309	20.8698	808.979	238.651	0.0826863	130.735	603.966	0.366939	57.9504	1.9562
MPI-ESM_GLAC1D	75	20.4112	23.4526	386.445	22.8811	27.6128	29.1776	19.226	1148.71	309.994	0.255576	129.69	869.285	2.15015	109.584	7.7205
MPI-ESM_GLAC1D	78.75	20.4112	23.4352	481.609	23.4169	24.0315	30.3761	17.4145	1588.93	443.604	3.79314	131.252	1207.72	11.9109	198.042	19.5661
MPI-ESM_GLAC1D	82.5	20.4112	24.3761	423.208	25.1585	19.1622	30.102	19.1622	1325.29	392.763	5.78595	125.824	938.624	23.936	246.4	23.936
MPI-ESM_GLAC1D	97.5	20.4112	19.4375	320.381	21.2034	19.6045	22.8846	14.4594	1101.47	256.85	12.0349	104.589	692.421	44.8856	278.064	56.227
MPI-ESM_GLAC1D	101.25	20.4112	18.208	392.357	20.2405	12.27	22.5109	12.27	1025.46	241.118	12.9988	99.2644	618.049	55.8951	284.81	55.8951
MPI-ESM_GLAC1D	105	20.4112	18.8654	411.626	21.8121	12.6443	22.905	12.6443	1398.72	292.774	20.7146	83.1749	749.113	79.6915	605.224	79.6915
MPI-ESM_GLAC1D	108.75	20.4112	21.1515	403.766	25.3393	15.0727	25.3393	15.392	1425.93	272.898	22.5564	73.6433	693.033	96.9516	693.033	122.01
MPI-ESM_GLAC1D	-101.25	20.4112	18.3608	263.212	20.1407	14.5929	21.4341	14.8008	1106.03	197.051	33.6415	63.7581	538.85	147.788	331.205	166.408
MPI-ESM_GLAC1D	-97.5	20.4112	19.6548	276.417	21.989	16.0496	22.2036	15.8327	1017.19	158.243	34.7272	51.4467	447.976	130.959	383.813	168.358
MPI-ESM_GLAC1D	-90	20.4112	25.0875	193.093	26.8601	22.2872	26.8601	22.2872	1125.79	224.102	28.3546	62.2121	497.16	103.346	497.16	103.346
MPI-ESM_GLAC1D	-15	20.4112	28.6027	570.699	34.8941	21.6583	34.9565	21.0365	7.39827	3.27608	0.000571059	61.29	6.05036	0.37544	5.49929	0.741849
MPI-ESM_GLAC1D	-11.25	20.4112	29.4713	767.945	37.1226	19.95	38.4428	19.67	6.7534	2.76794	0.000457903	57.8026	5.87033	0.258098	4.51838	0.431123
MPI-ESM_GLAC1D	-7.5	20.4112	28.7215	770.841	37.6668	19.2397	37.6668	18.8835	3.77163	1.43146	0.000307029	34.2675	2.40328	0.0230736	2.40328	0.0356063
MPI-ESM_GLAC1D	-3.75	20.4112	28.8771	715.767	36.6263	19.53	36.9526	19.53	2.90924	1.02187	0.000226311	30.1725	1.69759	0.00128243	1.62933	0.00128243
MPI-ESM_GLAC1D	0	16.7001	29.6473	598.515	33.6194	21.2852	35.875	21.2852	46.4222	23.9987	0.000114287	146.327	37.1256	0.000905246	16.5946	0.000905246
MPI-ESM_GLAC1D	3.75	16.7001	27.4647	643.59	31.7457	18.6661	34.1387	18.6661	51.0941	29.1835	2.02182e-11	163.247	42.882	7.54373e-05	16.7459	7.54373e-05
MPI-ESM_GLAC1D	7.5	16.7001	25.6356	682.385	30.5517	16.4265	32.5697	16.4265	29.4049	16.5922	8.95682e-11	138.911	22.6147	0.000188593	9.48712	0.000188593
MPI-ESM_GLAC1D	11.25	16.7001	25.4956	705.077	31.9673	16.0319	32.502	16.0319	6.04587	2.52484	2.02182e-11	56.2803	3.07561	0.000603497	2.27544	0.000603497
MPI-ESM_GLAC1D	15	16.7001	25.7106	690.765	31.1617	19.5176	32.4805	16.375	4.01548	2.54019	2.02182e-11	55.0564	2.81784	4.37536e-05	0.971097	1.99355e-10
MPI-ESM_GLAC1D	18.75	16.7001	24.6839	657.536	29.9377	18.7051	31.0554	15.6713	4.82692	3.47214	4.88674e-12	70.3477	4.04109	0.000307784	0.946278	0.00026403
MPI-ESM_GLAC1D	22.5	16.7001	23.736	650.402	29.193	14.7409	30.1739	14.7409	3.57625	2.98056	2.02182e-11	65.6413	3.39173	0.000150874	3.3465	0.000150874
MPI-ESM_GLAC1D	26.25	16.7001	23.5703	662.852	29.4846	14.2865	30.4513	14.2865	4.19385	3.17485	2.02182e-11	66.9053	3.76714	0.000226312	3.68035	0.000226312
MPI-ESM_GLAC1D	30	16.7001	24.8937	639.343	30.8785	15.653	31.6179	15.653	8.68267	6.74615	8.95682e-11	110.807	7.78839	0.000113156	7.47556	0.000113156
MPI-ESM_GLAC1D	33.75	16.7001	27.4095	552.2	31.4695	18.8904	33.1284	19.1257	13.7119	10.1388	7.54371e-05	133.723	12.0165	0.00203793	11.1939	0.0736266
MPI-ESM_GLAC1D	37.5	16.7001	28.625	479.867	32.3269	21.418	33.6147	21.418	11.0914	4.27106	4.88674e-12	64.8845	7.53097	0.339731	4.65266	0.339731
MPI-ESM_GLAC1D	45	16.7001	24.1227	626.817	30.7633	15.3529	31.3914	15.3529	82.9684	47.1805	0.0444325	169.916	72.2795	0.454848	61.762	0.454848
MPI-ESM_GLAC1D	48.75	16.7001	23.9054	607.87	30.1044	15.1856	30.92	15.1856	161.729	52.2321	0.0363607	131.525	131.011	0.128922	97.6394	0.128922
MPI-ESM_GLAC1D	52.5	16.7001	24.8668	449.405	27.6219	19.5026	29.823	18.1101	96.5324	46.0254	0.0514104	147.878	77.2483	0.227902	32.6743	0.184481
MPI-ESM_GLAC1D	75	16.7001	22.5589	305.23	21.5335	26.4891	27.007	19.4017	1640.32	418.975	2.74513	120.121	1138.53	10.0714	226.715	18.3834
MPI-ESM_GLAC1D	78.75	16.7001	23.2633	388.179	22.3831	21.476	28.9132	18.8331	1687.82	392.562	4.81037	115.829	1128.57	18.0117	292.168	25.9632
MPI-ESM_GLAC1D	82.5	16.7001	25.4487	373.76	25.0992	23.211	30.8319	21.3269	1681.8	381.241	5.87734	104.187	1035.3	25.4553	340.457	26.4876
MPI-ESM_GLAC1D	97.5	16.7001	23.4743	236.341	23.5107	20.9089	26.4845	20.1345	1676.16	355.927	4.419	103.132	992.238	17.726	223.676	15.4048
MPI-ESM_GLAC1D	101.25	16.7001	21.4786	281.995	22.1116	18.3913	24.8022	17.3565	1403.81	251.239	7.28074	89.1589	746.558	27.2089	292.932	24.3538
MPI-ESM_GLAC1D	105	16.7001	21.2368	281.335	23.476	17.5417	23.9835	16.8429	1418.08	252.863	21.2243	77.8174	706.412	66.5884	488.74	66.2686
MPI-ESM_GLAC1D	-97.5	16.7001	21.1238	173.234	21.6993	19.1472	23.2801	18.7426	1716.8	288.152	32.0735	76.6138	855.383	98.4727	295.764	100.468
MPI-ESM_GLAC1D	-93.75	16.7001	22.5027	181.648	23.0294	20.6628	24.8849	20.2172	1492.16	270.311	28.2276	75.821	725.729	86.4891	243.98	90.863
MPI-ESM_GLAC1D	-90	16.7001	24.4564	148.969	24.7542	22.6901	26.3071	22.6901	1059.91	194.357	16.549	80.8976	518.49	50.3921	336.454	50.3921
MPI-ESM_GLAC1D	-15	16.7001	29.8667	368.166	31.6571	24.6472	33.5135	24.6472	78.9681	43.9537	0.00079209	173.536	74.6382	0.137786	3.23984	0.137786
MPI-ESM_GLAC1D	-11.25	16.7001	30.2443	519.765	32.6975	23.323	35.9516	21.9555	70.8447	37.7354	0.000944096	166.041	65.0851	0.0759652	5.02562	0.062878
MPI-ESM_GLAC1D	-7.5	16.7001	29.0425	533.214	31.9814	21.6895	34.709	21.6895	75.0302	36.1455	0.000189724	160.514	65.8963	0.0609909	32.711	0.0609909
MPI-ESM_GLAC1D	-3.75	16.7001	29.3756	545.31	32.9098	22.2475	35.0196	21.6276	46.885	21.6887	0.000113156	140.172	38.7975	0.000706469	20.3345	0.00079209
MPI-ESM_GLAC1D	0	12.989	29.2177	376.653	29.2887	24.254	33.5571	22.8494	291.462	120.608	0.000150874	146.119	235.088	0.00052806	50.3871	0.000642347
MPI-ESM_GLAC1D	3.75	12.989	28.2373	404.72	28.4189	22.9362	33.0337	22.9362	338.262	144.547	0.000226311	155.051	281.202	0.00079209	52.5347	0.00079209
MPI-ESM_GLAC1D	7.5	12.989	27.0457	446.793	27.9423	20.9362	32.1574	20.9362	269.076	127.099	3.77187e-05	170.379	232.203	0.000226312	35.6806	0.000226312
MPI-ESM_GLAC1D	11.25	12.989	27.9077	498.799	29.5061	20.8952	33.4614	20.8952	127.938	73.4241	1.13165e-06	189.67	118.156	0.000188593	9.72762	0.000188593
MPI-ESM_GLAC1D	15	12.989	28.6006	500.758	30.221	24.7377	34.2765	21.502	138.823	84.0898	3.77187e-05	202.555	132.108	0.000571814	6.42811	0.00026403
MPI-ESM_GLAC1D	18.75	12.989	27.3374	478.946	29.2144	20.3425	32.6417	20.3425	158.761	89.7924	2.02182e-11	198.54	150.938	0.000226312	7.66822	0.000226312
MPI-ESM_GLAC1D	22.5	12.989	26.0911	476.083	28.6285	18.806	30.9673	18.806	105.484	63.9832	0.00026403	195.389	99.1512	0.0010184	5.66812	0.0010184
MPI-ESM_GLAC1D	26.25	12.989	26.2034	453.979	28.721	18.9935	30.6769	18.9935	97.3739	60.8228	3.77187e-05	195.409	92.7247	0.000150874	4.05037	0.000150874
MPI-ESM_GLAC1D	30	12.989	26.8968	393.304	28.5868	20.5736	30.9536	20.5736	138.946	83.9567	0.000339467	196.558	131.872	0.00350783	4.36147	0.00350783
MPI-ESM_GLAC1D	33.75	12.989	26.3982	338.094	27.3837	21.1439	30.1593	21.1439	178.795	98.766	0.00301749	182.437	160.281	0.499167	6.8328	0.499167
MPI-ESM_GLAC1D	37.5	12.989	24.6136	334.93	26.1018	19.6029	28.2921	19.6029	177.141	83.3454	0.0876202	152.043	134.309	0.566495	6.98869	0.566495
MPI-ESM_GLAC1D	41.25	12.989	23.3004	402.82	26.5621	17.5189	27.8809	17.5189	184.274	90.6599	0.0705714	154.604	137.605	1.76595	28.27	1.76595
MPI-ESM_GLAC1D	78.75	12.989	24.1717	293.919	22.5022	24.0411	28.702	21.6313	1606.92	324.648	10.4897	90.871	854.299	41.334	98.3824	68.3255
MPI-ESM_GLAC1D	101.25	12.989	22.7941	156.574	22.7424	21.5508	24.9344	20.7726	1519.75	284.757	9.50327	75.7684	698.066	35.5314	364.089	31.1095
MPI-ESM_GLAC1D	105	12.989	22.0439	150.092	22.801	20.0925	23.5539	19.6762	1679.49	287.252	28.1311	68.4641	763.612	85.5904	552.75	90.8618
MPI-ESM_GLAC1D	-86.25	12.989	24.0416	85.0533	23.8824	23.8457	25.2482	23.0825	1958.05	329.724	40.5421	64.3931	885.553	126.039	273.168	166.391
MPI-ESM_GLAC1D	-15	12.989	28.5514	280.728	26.7275	26.709	32.4324	25.3871	599.27	239.275	0.00675275	158.606	525.564	0.0489964	7.03742	0.0475642
MPI-ESM_GLAC1D	-11.25	12.989	27.9142	361.738	26.04	25.1628	32.896	23.6215	592.55	220.522	0.00377186	150.906	504.265	0.0234987	15.3441	0.154232
MPI-ESM_GLAC1D	-7.5	12.989	26.549	345.548	25.3564	23.1381	31.1779	21.6658	639.536	203.855	0.00079209	132.388	481.181	0.0540507	64.3902	0.0542404
MPI-ESM_GLAC1D	-3.75	12.989	27.7213	339.879	27.3928	23.4349	31.6011	22.0733	473.306	161.25	3.77187e-05	130.722	350.196	0.0243662	71.4048	0.000453755
MPI-ESM_GLAC1D	0	9.27785	28.0908	212.725	26.2639	27.2149	30.8478	26.2639	666.756	146.147	0.0762292	93.0209	383.157	1.13918	161.658	383.157
MPI-ESM_GLAC1D	3.75	9.27785	27.0215	224.189	25.0745	26.1986	29.9918	25.0745	832.703	174.837	0.00211224	92.0888	456.129	0.71869	99.9065	456.129
MPI-ESM_GLAC1D	7.5	9.27785	24.8768	254.313	23.3453	23.1641	28.4175	21.7296	881.613	220.286	0.000793222	105.348	553.466	0.134467	170.047	0.00916674
MPI-ESM_GLAC1D	11.25	9.27785	25.0175	296.304	23.1988	22.2748	29.116	21.0226	702.471	214.339	0.000565779	124.496	512.843	0.0485815	88.4113	0.00218881
MPI-ESM_GLAC1D	15	9.27785	26.1048	309.418	23.7275	23.5977	30.4474	22.4594	780.112	238.72	0.000301749	128.598	577.49	0.105008	79.3418	0.000981814
MPI-ESM_GLAC1D	18.75	9.27785	25.9105	272.11	23.8473	23.972	29.8146	22.8702	909.78	258.396	0.000150874	121.131	632.923	0.423353	113.373	0.0212367
MPI-ESM_GLAC1D	22.5	9.27785	25.7986	224.92	24.0966	23.9082	28.9611	23.0577	769.701	219.307	0.000150874	116.618	522.388	0.183199	114.834	0.016371
MPI-ESM_GLAC1D	26.25	9.27785	26.8703	227.265	24.6187	25.2911	30.0086	24.6187	681.822	198.875	0.000377186	119.302	473.833	0.0206698	92.5935	473.833
MPI-ESM_GLAC1D	30	9.27785	27.8875	250.228	24.7815	27.3529	31.0242	24.7815	651.271	195.415	0.000414904	119.339	460.57	0.0909017	79.574	460.57
MPI-ESM_GLAC1D	33.75	9.27785	25.1613	272.26	21.8538	25.6849	28.3504	21.8538	856.029	239.912	0.0164453	112.053	570.434	0.825923	112.595	570.434
MPI-ESM_GLAC1D	37.5	9.27785	20.757	221.089	18.7502	20.4616	23.6089	18.4448	964.259	216.84	0.591917	95.3202	574.849	2.44884	155.091	502.766
MPI-ESM_GLAC1D	41.25	9.27785	19.9983	216.57	20.3043	17.2032	22.8292	17.2032	728.136	191.985	0.230611	108.17	484.43	2.14026	114.302	2.14026
MPI-ESM_GLAC1D	45	9.27785	23.0674	332.513	26.0204	19.0638	26.5567	18.2325	96.7127	22.9897	0.0390764	85.6617	54.586	1.32581	28.6975	0.24253
MPI-ESM_GLAC1D	48.75	9.27785	25.1416	296.895	22.8933	21.278	28.0586	21.278	18.3175	6.1566	0.0703512	72.6239	8.80392	0.45161	2.66243	0.45161
MPI-ESM_GLAC1D	101.25	9.27785	23.5978	92.6525	23.3615	22.8249	24.8719	22.391	1991.59	326.066	32.6639	61.2484	855.18	113.493	438.288	106.117
MPI-ESM_GLAC1D	105	9.27785	23.9067	84.3781	23.8628	22.9304	24.9357	22.6996	2150.16	380.131	29.6728	69.5493	969.661	94.4975	455.432	96.8231
MPI-ESM_GLAC1D	-82.5	9.27785	24.7352	46.7686	24.5353	24.6706	25.3706	24.2703	2635.66	359.437	69.0378	46.3379	989.416	222.054	592.105	383.58
MPI-ESM_GLAC1D	-78.75	9.27785	24.3195	43.6706	24.088	24.3295	24.8929	23.9415	2635.2	362.252	39.3521	54.0893	1014.05	133.525	390.901	319.356
MPI-ESM_GLAC1D	-75	9.27785	21.5398	35.4474	21.659	21.0795	21.8706	20.9399	2378.07	320.988	25.3082	57.8163	914.818	94.0365	631.592	106.25
MPI-ESM_GLAC1D	-71.25	9.27785	20.6508	60.1829	20.9129	19.8327	21.2091	19.5838	1992.24	276.535	28.3735	58.756	786.651	91.1871	507.417	108.621
MPI-ESM_GLAC1D	-67.5	9.27785	23.9798	83.3664	23.8367	24.3744	25.1162	23.0864	1259.67	192.691	14.8281	63.8156	503.469	58.5205	146.797	63.774
MPI-ESM_GLAC1D	-63.75	9.27785	26.7913	73.7146	27.3693	26.3047	27.3693	25.7032	477.94	71.3742	7.34942	58.0931	185.866	28.8819	185.866	28.02
MPI-ESM_GLAC1D	-11.25	9.27785	24.6644	265.126	22.8596	24.0072	28.4248	22.3364	1507.89	285.496	1.74422	85.1778	787.438	7.04892	122.917	8.05589
MPI-ESM_GLAC1D	-7.5	9.27785	23.9381	253.36	22.5875	22.8295	27.4209	21.061	1586.22	283.87	1.38174	80.8141	786.827	8.25686	203.713	4.94992
MPI-ESM_GLAC1D	-3.75	9.27785	25.8344	226.662	24.3674	24.9812	28.9189	23.4229	1138.55	248.366	0.226727	92.1308	649.416	3.11163	134.186	0.757277
MPI-ESM_GLAC1D	0	5.56671	27.1756	115.694	27.4946	27.9558	28.7867	26.0374	811.708	119.561	7.29737	50.5853	321.598	46.2235	227.347	217.312
MPI-ESM_GLAC1D	3.75	5.56671	25.9677	133.725	26.0819	26.9727	27.9209	24.8108	1283.99	175.396	10.9921	51.9263	508.85	60.0873	324.303	353.609
MPI-ESM_GLAC1D	7.5	5.56671	22.7147	150.043	21.6747	22.5502	24.9495	21.6747	1776.3	229.245	4.69389	62.761	667.563	29.9334	344.221	667.563
MPI-ESM_GLAC1D	11.25	5.56671	21.3654	180.701	20.2887	20.3067	23.8146	19.2361	1693.84	249.062	0.901813	72.2258	716.43	7.42418	459.321	5.83989
MPI-ESM_GLAC1D	15	5.56671	22.5763	181.8	21.346	21.7162	25.1089	20.6352	1567.18	251.666	0.757162	71.0875	689.152	7.50818	389.218	6.97937
MPI-ESM_GLAC1D	18.75	5.56671	24.1364	191.815	22.4924	25.0313	26.9827	22.4924	1520.55	232.859	0.914034	66.728	649.561	11.3716	260.71	649.561
MPI-ESM_GLAC1D	22.5	5.56671	23.985	209.897	22.0712	25.7982	26.9493	22.0712	1486.59	220	0.711297	68.3411	592.694	8.75765	86.041	592.694
MPI-ESM_GLAC1D	26.25	5.56671	23.8886	210.126	23.8299	25.4981	26.8147	21.8479	1505.79	214.212	0.255883	69.6471	621.735	6.65005	286.617	589.105
MPI-ESM_GLAC1D	30	5.56671	24.8349	226.754	22.5158	27.142	28.0013	22.5158	1272.63	169.913	0.294129	63.5956	488.685	4.79822	60.2355	488.685
MPI-ESM_GLAC1D	33.75	5.56671	23.4494	233.211	21.0789	26.3386	26.836	21.0219	878.437	132.81	0.422486	64.6625	340.094	4.608	53.9644	338.425
MPI-ESM_GLAC1D	37.5	5.56671	19.8846	226.517	19.2199	22.5918	23.153	17.9428	1038.03	177.935	2.12186	68.8359	454.195	7.78998	41.1552	363.678
MPI-ESM_GLAC1D	41.25	5.56671	20.2851	132.719	20.3826	20.7429	22.1311	18.8751	765.289	146.009	0.15657	79.7308	339.749	1.58459	90.6806	262.251
MPI-ESM_GLAC1D	45	5.56671	24.2671	143.228	25.7759	22.6042	25.7759	21.9056	80.4203	22.2968	0.0696662	98.5949	37.2193	1.51614	37.2193	0.222162
MPI-ESM_GLAC1D	97.5	5.56671	24.3917	36.4107	24.2665	24.1068	24.8725	23.9399	2601.77	373.945	85.8774	46.1279	1037.18	278.273	607.044	272.581
MPI-ESM_GLAC1D	101.25	5.56671	23.8564	50.5277	23.6993	23.3666	24.5268	23.1677	2378.92	292.848	66.1998	42.5638	853.274	225.598	596.079	213.45
MPI-ESM_GLAC1D	116.25	5.56671	23.3989	32.9113	23.3491	23.7528	23.8533	22.9675	3225.1	305.263	210.959	9.83175	894.757	709.762	733.028	819.036
MPI-ESM_GLAC1D	-75	5.56671	19.4982	31.5548	19.4018	19.3607	19.9279	19.1694	2444.3	347.719	66.2068	44.1771	890.385	246.086	757.728	399.587
MPI-ESM_GLAC1D	-71.25	5.56671	18.554	53.4249	18.6996	18.3503	19.2529	18.0795	1922.23	284.47	55.2248	46.1859	691.771	194.969	510.58	386.033
MPI-ESM_GLAC1D	-67.5	5.56671	21.4907	100.683	21.2085	21.7351	22.9983	20.547	1848.97	259.287	34.0666	50.5357	663.994	110.095	359.916	543.103
MPI-ESM_GLAC1D	-63.75	5.56671	24.1128	159.583	22.3712	26.0586	26.4215	22.3712	1261.12	180.485	10.6795	64.8098	519.877	50.5204	151.936	519.877
MPI-ESM_GLAC1D	-60	5.56671	24.5213	97.5653	23.3113	25.3217	25.8076	23.3113	1055.52	158.186	27.68	52.388	442.941	93.3469	140.745	442.941
MPI-ESM_GLAC1D	-7.5	5.56671	23.7018	116.165	23.7832	23.7331	25.3649	22.7511	1813.85	241.278	20.9148	47.0666	655.019	101.986	418.452	92.0969
MPI-ESM_GLAC1D	-3.75	5.56671	25.6061	134.654	24.4345	26.0912	27.4775	24.4345	1192.94	158.659	9.20148	50.5175	439.157	50.3372	263.012	439.157
MPI-ESM_GLAC1D	11.25	1.85557	21.4975	57.1887	22.2873	21.4037	22.2873	20.9449	2081.5	253.741	34.6408	42.9141	707.186	147.187	707.186	510.551
MPI-ESM_GLAC1D	15	1.85557	21.7718	48.8825	21.6065	21.295	22.3458	20.9399	2079.52	294.788	29.7842	47.0155	795.129	131.899	630.463	142.243
MPI-ESM_GLAC1D	18.75	1.85557	23.33	75.5219	22.5193	23.739	24.167	22.627	1744.94	242.987	38.1656	44.983	655.407	161.138	461.888	305.791
MPI-ESM_GLAC1D	22.5	1.85557	23.0919	116.026	23.3263	24.5612	24.5625	21.7543	1612.06	211.483	33.786	42.3483	561.347	152.228	300.932	532.735
MPI-ESM_GLAC1D	26.25	1.85557	21.3794	83.8783	20.7898	21.8698	22.1377	20.6355	1933.37	221.905	40.4631	36.5388	637.99	183.35	539.181	327.492
MPI-ESM_GLAC1D	30	1.85557	21.2845	141.023	19.9913	22.7194	22.726	19.6446	1428.27	199.126	43.4864	45.2587	546.855	182.744	209.615	360.897
MPI-ESM_GLAC1D	33.75	1.85557	21.7422	147.578	20.1212	22.6681	22.8119	20.1212	662.62	115.244	3.25043	69.2448	248.36	25.9575	131.696	248.36
MPI-ESM_GLAC1D	37.5	1.85557	21.3201	130.521	21.3992	20.4864	23.3249	20.2246	471.154	79.4584	6.93022	71.1943	143.037	40.5235	45.236	97.3962
MPI-ESM_GLAC1D	41.25	1.85557	22.945	145.32	22.5526	24.3796	24.527	20.9955	403.495	79.2215	0.384201	81.7961	173.548	7.48601	67.3302	64.0157
MPI-ESM_GLAC1D	45	1.85557	26.2138	121.9	26.7703	26.278	27.4539	24.6609	152.403	38.8399	0.138352	97.5563	59.7536	1.70896	51.0682	18.6257
MPI-ESM_GLAC1D	101.25	1.85557	23.2169	32.1538	23.2177	22.7647	23.6206	22.7647	2167.29	242.918	153.008	15.0528	656.846	467.205	493.615	467.205
MPI-ESM_GLAC1D	112.5	1.85557	22.7636	21.7203	22.5717	23.0682	23.0682	22.4933	3019.38	281.825	216.674	9.21896	836.896	668.825	668.825	837.696
MPI-ESM_GLAC1D	116.25	1.85557	22.4788	23.9054	22.3276	22.5781	22.8426	22.3006	3224.34	299.812	234.86	8.026	870.413	723.436	774.201	839.74
MPI-ESM_GLAC1D	-75	1.85557	19.4873	36.8379	19.6462	19.3308	19.8725	19.1244	2221.95	298.569	51.1633	45.9936	803.879	227.415	655.147	232.106
MPI-ESM_GLAC1D	-71.25	1.85557	20.2601	80.1861	20.7933	19.4038	20.8217	19.0456	2012.83	286.052	76.4586	45.9469	724.887	287.275	463.22	321.535
MPI-ESM_GLAC1D	-67.5	1.85557	23.1121	121.955	23.075	24.5573	24.6967	21.5306	1754.95	278.054	30.6323	52.6997	675.06	123.653	272.319	453.883
MPI-ESM_GLAC1D	-63.75	1.85557	22.8484	106.94	22.3279	23.7605	24.2377	21.5913	1822.78	262.455	38.4723	46.3042	691.586	130.935	232.756	502.381
MPI-ESM_GLAC1D	-60	1.85557	22.4534	90.1625	22.3227	22.7637	23.665	21.3471	1828.13	237.312	70.9314	35.8884	662.403	215.431	438.017	502.866
MPI-ESM_GLAC1D	-56.25	1.85557	24.6536	139.29	22.849	26.2585	26.3115	22.849	1514.58	223.438	44.5542	47.806	609.693	156.695	273.511	609.693
MPI-ESM_GLAC1D	-52.5	1.85557	25.775	160.04	23.3321	26.754	27.0105	23.3321	1255.23	229.409	41.8361	62.0055	613.228	125.546	140.662	613.228
MPI-ESM_GLAC1D	11.25	-1.85557	22.5311	63.9577	23.312	21.8075	23.312	21.8075	1758.72	241.184	35.1733	45.8073	641.741	162.019	641.741	162.019
MPI-ESM_GLAC1D	15	-1.85557	21.827	52.7639	21.2104	21.8022	22.3423	21.1185	2078.11	281.76	43.7166	45.7062	600.275	200.575	540.517	391.891
MPI-ESM_GLAC1D	18.75	-1.85557	22.4487	59.5956	22.2562	22.8367	22.9835	21.5349	1979.04	293.912	31.6452	51.0361	805.969	159.809	362.982	466.868
MPI-ESM_GLAC1D	22.5	-1.85557	22.775	101.903	21.8864	23.7123	23.9702	21.7013	1704.15	254.505	22.6291	54.9316	698.9	116.863	133.161	571.395
MPI-ESM_GLAC1D	26.25	-1.85557	21.4655	118.318	20.1062	22.8211	22.8211	20.0095	1643.04	260.081	10.7012	60.9814	591.713	88.3522	88.3522	506.363
MPI-ESM_GLAC1D	30	-1.85557	20.3208	143.288	18.4382	21.3113	21.6255	18.2615	1199.14	198.789	1.76791	74.8037	539.518	21.8459	106.987	483.611
MPI-ESM_GLAC1D	33.75	-1.85557	20.2636	112.914	18.9366	19.7729	21.3439	18.9366	804.722	179.173	1.12262	87.5431	417.364	8.16856	150.9	417.364
MPI-ESM_GLAC1D	37.5	-1.85557	21.5783	131.331	21.964	19.7566	23.1051	19.7566	555.485	133.052	7.34856	80.0836	261.027	28.8472	131.871	28.8472
MPI-ESM_GLAC1D	101.25	-1.85557	23.2734	24.3734	22.9987	23.5666	23.5734	22.9158	2758.62	286.667	168.482	16.4116	819.094	551.896	560.384	806.969
MPI-ESM_GLAC1D	105	-1.85557	24.0398	27.8475	24.0783	24.3813	24.3813	23.6306	2688.4	275.302	184.474	13.1673	785.094	577.883	577.883	684.006
MPI-ESM_GLAC1D	112.5	-1.85557	23.2775	27.9377	23.1589	23.6743	23.6743	22.9242	3063.09	311.495	207.342	13.2791	898.779	650.563	650.563	889.839
MPI-ESM_GLAC1D	120	-1.85557	24.5254	10.225	24.5	24.6151	24.6369	24.4234	2734.99	281.619	184.956	14.0844	812.876	570.451	649.281	681.085
MPI-ESM_GLAC1D	135	-1.85557	24.7579	13.4309	24.797	24.9165	24.9165	24.6055	3635.99	348.821	233.129	10.9895	1016.3	770.716	770.716	959.819
MPI-ESM_GLAC1D	138.75	-1.85557	23.8548	19.649	23.6908	23.9676	24.0669	23.5938	3214.8	307.844	208.328	13.1585	913.598	656.815	742.667	905.85
MPI-ESM_GLAC1D	-78.75	-1.85557	20.9549	59.2812	20.6526	21.4682	21.7262	20.2461	2092.08	342.841	13.4149	64.5844	907.173	72.071	210.018	766.312
MPI-ESM_GLAC1D	-75	-1.85557	19.7052	90.4522	19.5339	19.448	20.9852	18.6973	2009.41	279.363	19.5931	59.2333	708.154	91.6019	463.32	112.269
MPI-ESM_GLAC1D	-71.25	-1.85557	22.9564	141.9	22.8688	22.4812	24.7905	21.3353	1510.57	238.116	15.3035	62.6639	598.299	64.5994	325.521	111.338
MPI-ESM_GLAC1D	-67.5	-1.85557	26.5302	168.657	26.012	26.4357	28.5092	24.5903	1277.86	208.816	11.3559	66.8663	526.731	60.9251	277.614	348.768
MPI-ESM_GLAC1D	-63.75	-1.85557	23.9334	84.5104	23.3817	24.3889	24.9858	22.8946	1976.08	302.668	62.4894	46.1619	791.487	251.201	404.807	449.764
MPI-ESM_GLAC1D	-60	-1.85557	22.2446	66.5294	22.4858	22.0647	22.8311	21.3425	2108.62	284.027	76.9088	37.8151	752.373	279.827	574.011	420.258
MPI-ESM_GLAC1D	-56.25	-1.85557	24.0464	103.063	24.1108	23.9605	24.8663	22.556	1734.48	218.688	52.1689	40.0895	586.45	185.918	464.389	324.836
MPI-ESM_GLAC1D	-52.5	-1.85557	25.6994	175.476	24.6714	26.0966	27.6423	23.2976	1343.99	206.813	31.0242	49.2096	547.977	115.517	271.304	363.443
MPI-ESM_GLAC1D	-48.75	-1.85557	24.8362	182.997	23.4891	25.1923	27.4691	22.8392	1456.54	252.666	16.7487	65.6473	695.703	90.3249	167.129	457.058
MPI-ESM_GLAC1D	-45	-1.85557	25.5639	194.289	23.8511	26.719	28.3734	23.6678	1229.8	223.838	9.43209	71.5926	597.043	44.671	118.775	513.497
MPI-ESM_GLAC1D	15	-5.56671	22.6821	94.1252	21.1163	22.7866	23.7716	21.4603	1403.73	222.822	3.60431	73.7803	585.804	26.2668	129.081	543.87
MPI-ESM_GLAC1D	18.75	-5.56671	21.4171	96.5621	20.6095	21.1401	22.56	20.3357	1853.38	318.691	6.17713	72.6832	843.358	41.7754	380.448	756.372
MPI-ESM_GLAC1D	22.5	-5.56671	22.0778	112.619	20.9636	22.5808	23.4573	20.9854	1657.38	305.805	1.66003	83.4312	805.95	21.9998	139.551	722.543
MPI-ESM_GLAC1D	26.25	-5.56671	21.9588	133.78	20.3832	22.614	23.6375	20.3832	1413.88	296.336	0.0702697	97.7782	772.732	2.85809	247.977	772.732
MPI-ESM_GLAC1D	30	-5.56671	19.3287	132.227	18.3442	18.1928	20.9346	18.1921	1171.44	274.88	0.118474	107.202	761.658	1.41075	324.414	6.39669
MPI-ESM_GLAC1D	33.75	-5.56671	17.6692	207.683	18.2478	14.5515	19.3578	14.5515	992.736	243.975	3.0133	106.609	687.139	13.0899	213.97	13.0899
MPI-ESM_GLAC1D	37.5	-5.56671	20.0058	231.99	21.3175	18.9682	22.1576	16.6342	881.633	210.098	10.3422	85.2474	550.097	53.2126	335.12	86.1831
MPI-ESM_GLAC1D	105	-5.56671	25.1292	17.1322	25.0603	25.3553	25.3771	24.9638	2143.14	210.85	146.734	11.5474	605.144	485.546	487.501	533.598
MPI-ESM_GLAC1D	138.75	-5.56671	22.976	15.451	22.9499	22.8035	23.1245	22.8035	2618.08	314.736	127.51	31.291	914.164	392.234	749.764	392.234
MPI-ESM_GLAC1D	142.5	-5.56671	21.9464	31.1513	22.1713	21.4916	22.1495	21.4916	2522.99	337.579	97.6651	42.5619	976.677	310.913	902.997	310.913
MPI-ESM_GLAC1D	146.25	-5.56671	23.1126	33.5801	23.4011	22.6245	23.4137	22.6245	2895.43	375.487	144.684	37.1335	1082.39	439.399	1015.08	439.399
MPI-ESM_GLAC1D	-78.75	-5.56671	22.2596	84.7497	21.2054	22.2807	23.2469	21.2054	640.689	218.388	0.523006	141.842	525.113	2.75285	8.70096	525.113
MPI-ESM_GLAC1D	-75	-5.56671	19.6118	126.928	19.1329	19.2761	21.3589	18.2876	1497.5	248.25	8.89136	68.1227	644.199	43.017	250.791	220.797
MPI-ESM_GLAC1D	-71.25	-5.56671	21.4939	137.2	21.7852	20.4851	23.1264	19.6693	1826.66	263.639	8.74697	69.3648	739.479	39.7326	316.43	73.0371
MPI-ESM_GLAC1D	-67.5	-5.56671	25.9694	165.558	25.6276	25.8712	28.4051	24.6686	1452.92	230.241	2.4514	76.9706	642.023	13.6697	223.238	38.8824
MPI-ESM_GLAC1D	-63.75	-5.56671	25.6067	160.38	24.9144	25.1557	27.9904	24.1537	1740.5	283.922	8.14585	68.4497	729.678	46.2473	245.957	120.206
MPI-ESM_GLAC1D	-60	-5.56671	23.1064	98.302	23.0172	22.254	24.4196	21.9323	2033.69	308.842	16.4361	60.4196	807.908	87.0534	572.072	193.077
MPI-ESM_GLAC1D	-56.25	-5.56671	23.046	93.3993	23.2774	21.9982	24.072	21.7962	2143.22	318.768	11.0267	67.7295	910.164	65.9313	575.76	139.763
MPI-ESM_GLAC1D	-52.5	-5.56671	24.0913	136.968	23.8266	23.0541	25.8536	22.5586	1866.4	280.306	5.97858	74.744	839.301	37.4832	220.127	106.739
MPI-ESM_GLAC1D	-48.75	-5.56671	24.3147	209.894	23.1765	25.4221	27.4008	22.6061	1485.25	246.143	2.14038	77.3868	663.403	14.7871	297.156	110.505
MPI-ESM_GLAC1D	-45	-5.56671	24.0203	238.794	22.4104	24.8583	27.6801	22.0936	1329.26	250.57	1.76976	84.5471	666.869	10.4803	169.966	325.142
MPI-ESM_GLAC1D	-41.25	-5.56671	24.1782	223.533	22.6318	24.4983	27.4496	22.0792	1156.7	263.665	0.855759	100.065	683.272	5.43709	70.934	289.884
MPI-ESM_GLAC1D	-37.5	-5.56671	24.5408	164.27	23.7002	25.5841	26.0991	22.78	1134.52	251.013	2.14106	95.9768	668.206	13.084	250.408	202.822
MPI-ESM_GLAC1D	15	-9.27785	23.0949	138.695	21.7995	23.3028	24.9559	21.1576	1101.23	273.221	0.468653	109.234	715.234	4.99262	35.0829	750.252
MPI-ESM_GLAC1D	18.75	-9.27785	19.5547	158.307	18.9187	18.4428	21.6206	17.8106	1603.33	302.281	1.71205	94.7962	892.334	11.3339	191.315	26.0015
MPI-ESM_GLAC1D	22.5	-9.27785	19.8161	149.767	19.5964	18.9623	21.728	18.3229	1557.58	296.876	0.215524	98.6772	851.837	4.1372	236.003	10.5169
MPI-ESM_GLAC1D	26.25	-9.27785	20.5879	158.477	19.9375	19.8146	22.8562	19.3542	1400.21	324.163	0.0145971	113.814	922.972	0.715597	130.466	2.77088
MPI-ESM_GLAC1D	30	-9.27785	17.5519	209.579	17.8145	15.0633	20.1944	14.9577	1224.4	304.43	0.602177	117.626	852.348	2.46151	281.601	5.76611
MPI-ESM_GLAC1D	33.75	-9.27785	15.4087	268.503	17.3223	13.1122	17.4884	11.6043	1215.82	277.061	10.7932	96.8662	777.464	42.8167	682.156	56.3919
MPI-ESM_GLAC1D	37.5	-9.27785	19.4681	221.64	21.4864	18.7566	21.4799	16.364	1095.73	224.488	10.8831	82.6958	620.104	56.0342	503.405	93.2257
MPI-ESM_GLAC1D	-78.75	-9.27785	24.1762	60.3955	23.3668	24.2664	24.7775	23.3668	387.847	149.562	0.0102217	155.011	341.764	0.494151	1.23103	341.764
MPI-ESM_GLAC1D	-75	-9.27785	19.3992	163.339	18.0185	18.6739	21.6631	17.841	975.352	245.655	2.73192	102.588	601.236	15.2222	114.397	165.306
MPI-ESM_GLAC1D	-71.25	-9.27785	16.5934	120.599	17.0235	15.1284	17.8819	14.8132	2056.58	314.624	19.5165	67.1948	910.803	83.8184	572.641	90.3312
MPI-ESM_GLAC1D	-67.5	-9.27785	20.317	111.697	21.142	18.8217	21.142	18.6712	2169.62	338.914	15.0189	69.3903	964.95	65.3496	964.95	88.4237
MPI-ESM_GLAC1D	-63.75	-9.27785	24.2905	129.059	24.3314	23.0815	25.7612	22.569	1703.56	280.37	6.17958	80.595	821.195	27.9175	240.344	40.3331
MPI-ESM_GLAC1D	-60	-9.27785	23.7732	129.632	23.7455	22.4031	25.3435	22.0749	1835.98	302.055	4.37434	82.4851	882.091	22.5785	483.586	44.2436
MPI-ESM_GLAC1D	-56.25	-9.27785	22.2796	108.778	22.2331	20.978	23.5622	20.8867	2185.66	346.7	5.30527	80.7148	1032.04	27.8843	601.828	55.2101
MPI-ESM_GLAC1D	-52.5	-9.27785	22.5009	110.36	22.3451	21.3888	23.7901	21.2494	2010.2	348.822	2.27579	86.0986	1017.97	16.4198	544.055	31.3133
MPI-ESM_GLAC1D	-48.75	-9.27785	22.8823	151.028	22.4069	21.4838	24.919	21.3054	1699.92	304.163	0.873298	91.5131	877.754	6.92437	434.989	16.4396
MPI-ESM_GLAC1D	-45	-9.27785	21.8198	177.427	21.502	20.0073	24.3415	19.8275	1600.87	287.606	1.61134	91.5102	818.345	8.22966	356.272	26.788
MPI-ESM_GLAC1D	-41.25	-9.27785	21.5125	180.734	21.5066	20.8368	23.9307	19.3939	1513.24	276.153	4.72614	90.5117	797.142	24.7287	255.697	58.7725
MPI-ESM_GLAC1D	-37.5	-9.27785	23.3727	140.814	23.3288	22.6624	24.6375	21.7865	1244.7	227.237	7.4957	87.8367	661.343	27.8398	519.661	83.6922
MPI-ESM_GLAC1D	15	-12.989	22.5696	191.254	21.1602	21.3295	25.5232	21.1257	930.646	277.604	0.0145594	126.519	686.274	0.781868	58.4073	10.9239
MPI-ESM_GLAC1D	18.75	-12.989	17.9228	244.446	17.959	15.185	21.2263	14.888	1371.02	294.23	1.01553	104.85	874.515	5.74748	304.715	16.1925
MPI-ESM_GLAC1D	22.5	-12.989	18.1943	213.104	18.7279	15.4103	20.5961	15.3959	1324.2	265.566	0.467899	103.45	785.271	3.79992	386.761	10.4816
MPI-ESM_GLAC1D	26.25	-12.989	20.303	205.771	20.2175	17.7651	22.9144	17.7651	1120.19	280.182	0.0691758	117.361	803.201	0.723291	267.281	0.723291
MPI-ESM_GLAC1D	30	-12.989	18.0187	274.754	18.7325	14.586	21.4463	14.586	1116.6	290.576	1.20956	117.778	812.449	6.90336	234.219	6.90336
MPI-ESM_GLAC1D	33.75	-12.989	16.7054	266.616	18.4265	14.5269	19.0711	13.0815	1219.6	270.023	12.0358	89.7553	751.397	60.5853	660.707	81.353
MPI-ESM_GLAC1D	37.5	-12.989	21.3903	179.818	22.5977	19.6721	23.032	18.825	1086.56	233.676	6.26294	91.4145	670.495	32.4069	543.906	49.5798
MPI-ESM_GLAC1D	135	-12.989	29.2378	200.489	29.2338	26.8764	31.2592	26.8764	689.524	162.506	1.4794	103.561	433.339	6.49242	285.609	6.49242
MPI-ESM_GLAC1D	142.5	-12.989	28.7029	185.777	29.8021	26.2163	30.7934	26.2163	633.473	158.134	2.74716	110.421	428.816	12.2818	321.491	12.2818
MPI-ESM_GLAC1D	-75	-12.989	18.5158	118.139	17.7155	17.8289	20.1683	17.502	789.823	220.951	0.459638	119.231	562.768	3.44321	52.1099	10.0684
MPI-ESM_GLAC1D	-71.25	-12.989	13.0371	149.713	13.2318	11.2996	14.4226	11.1107	1641.01	286.566	21.2534	72.0642	818.048	88.2024	627.03	89.0301
MPI-ESM_GLAC1D	-67.5	-12.989	13.7467	155.233	14.9577	11.5352	14.9802	11.5352	1850.61	262.31	31.8506	60.887	745.672	114.489	734.217	114.489
MPI-ESM_GLAC1D	-63.75	-12.989	19.4702	141.446	20.6218	17.4526	20.6635	17.4356	1740.7	294.071	20.5724	70.1715	856.957	82.0955	796.552	85.4696
MPI-ESM_GLAC1D	-60	-12.989	23.1274	150.331	23.418	21.2892	24.8057	20.9831	1447.82	271.365	7.05145	84.661	803.017	29.2734	362.047	41.8542
MPI-ESM_GLAC1D	-56.25	-12.989	22.0857	154.52	22.4642	19.9799	23.6722	19.8959	1897.04	346.022	7.43158	85.8716	1013.4	31.7223	493.331	40.7654
MPI-ESM_GLAC1D	-52.5	-12.989	21.3006	149.045	21.7644	19.2019	22.7556	19.2019	2104.75	379.444	4.55731	88.4098	1098.22	24.196	588.072	24.196
MPI-ESM_GLAC1D	-48.75	-12.989	20.9002	158.998	21.6211	18.6271	22.292	18.6271	1824.91	358.724	1.83588	95.3374	1022.86	11.8357	490.927	11.8357
MPI-ESM_GLAC1D	-45	-12.989	19.6912	174.057	20.9649	17.034	21.056	17.034	1593.42	313.678	7.51237	94.8564	875.071	25.2805	776.443	25.2805
MPI-ESM_GLAC1D	-41.25	-12.989	19.6118	162.502	20.9184	17.7574	21.0072	17.2052	1596.72	302.852	30.4082	76.5908	839.606	107.083	682.963	120.302
MPI-ESM_GLAC1D	11.25	-16.7001	25.2666	148.898	26.5061	23.5224	26.5061	22.9597	303.972	148.934	3.77186e-05	174.599	277.29	0.0875448	277.29	0.0975779
MPI-ESM_GLAC1D	15	-16.7001	23.054	289.873	23.2754	21.5328	25.9773	19.5196	577.625	190.198	0.00192365	140.805	456.822	0.128356	152.775	0.468766
MPI-ESM_GLAC1D	18.75	-16.7001	19.4445	352.623	20.6589	15.2397	22.5737	15.0768	1019.74	256.786	0.435159	112.067	710.239	3.31237	517.68	14.0328
MPI-ESM_GLAC1D	22.5	-16.7001	19.7806	299.555	20.5306	15.8054	23.212	15.8054	997.762	226.93	0.405135	108.566	664.108	4.19423	232.345	4.19423
MPI-ESM_GLAC1D	26.25	-16.7001	21.4699	290.717	21.851	17.517	24.7276	17.517	727.035	191.766	0.084565	120.973	553.288	1.14219	149.114	1.14219
MPI-ESM_GLAC1D	30	-16.7001	19.6839	323.257	21.0378	17.5712	22.2358	15.4584	799.766	209.475	1.16433	116.864	600.792	5.56892	484.786	7.19648
MPI-ESM_GLAC1D	33.75	-16.7001	19.2951	290.438	21.2845	16.9013	22.0489	15.3712	1114.5	258.228	8.75927	96.9255	734.099	38.5512	609.592	53.3428
MPI-ESM_GLAC1D	37.5	-16.7001	23.6769	204.49	25	21.592	25.5535	20.6902	876.134	208.161	4.44317	103.443	601.565	16.462	462.846	21.6916
MPI-ESM_GLAC1D	45	-16.7001	23.3914	178.23	23.7416	22.191	25.0248	21.2625	1352.66	299.1	3.68322	104.324	870.338	11.9458	659.304	15.3372
MPI-ESM_GLAC1D	48.75	-16.7001	22.5464	138.794	23.3112	21.0842	24.0007	20.6752	1429.19	312.968	10.9093	96.7933	904.349	40.9811	676.919	49.847
MPI-ESM_GLAC1D	127.5	-16.7001	26.6178	296.159	27.5352	24.7613	28.8959	22.7957	915.821	208.05	0.290395	110.522	613.013	2.00433	491.4	2.44243
MPI-ESM_GLAC1D	131.25	-16.7001	26.228	346.075	27.5977	21.7547	29.2859	21.7547	849.188	201.814	0.739548	112.309	578.26	2.85341	445.104	2.85341
MPI-ESM_GLAC1D	135	-16.7001	27.2117	381.916	29.0424	22.1674	30.9701	22.1674	743.958	181.882	1.31064	116.012	543.032	5.37433	386.943	5.37433
MPI-ESM_GLAC1D	138.75	-16.7001	28.6689	402.242	31.9056	23.0613	32.4405	23.0613	329.816	79.6205	2.18206	108.998	229.455	7.66826	209.432	7.66826
MPI-ESM_GLAC1D	142.5	-16.7001	27.7653	326.605	30.2963	23.1655	31.0903	23.1655	418.533	101.404	3.24531	110.154	278.216	10.7902	261.238	10.7902
MPI-ESM_GLAC1D	-71.25	-16.7001	14.0223	147.77	14.1999	12.1941	15.4324	12.1914	728.879	186.61	3.1819	114.857	491.293	10.7621	323.26	14.7553
MPI-ESM_GLAC1D	-67.5	-16.7001	11.0831	231.766	12.1062	8.2436	13.4897	7.97463	1173.26	256.253	14.0392	95.1475	689.768	46.0865	522.209	53.3397
MPI-ESM_GLAC1D	-63.75	-16.7001	14.7444	198.853	16.5502	12.0072	16.6853	12.0072	1718.86	261.948	34.6912	61.8199	765.501	125.683	770.106	125.683
MPI-ESM_GLAC1D	-60	-16.7001	21.7173	199.504	23.1778	18.976	23.3901	18.864	1230.93	202.961	24.0452	63.904	597.417	83.7302	524.493	97.9738
MPI-ESM_GLAC1D	-56.25	-16.7001	23.2745	214.492	24.459	20.2905	25.0333	20.2194	1219.89	223.748	11.8589	77.7501	659.918	45.8459	559.207	48.8489
MPI-ESM_GLAC1D	-52.5	-16.7001	20.4253	224.319	22.0066	17.3028	22.226	17.1564	1935.82	375.525	9.51934	88.2123	1078.33	38.377	994.78	41.8885
MPI-ESM_GLAC1D	-48.75	-16.7001	18.4521	230.647	20.612	15.392	20.612	15.0926	1898.72	362.795	8.59821	89.6174	1030.53	35.3191	1030.53	36.3293
MPI-ESM_GLAC1D	-45	-16.7001	17.723	227.603	20.2058	14.4825	20.058	14.4825	1524.4	298.365	17.1185	88.0776	832.736	53.854	701.242	53.854
MPI-ESM_GLAC1D	-41.25	-16.7001	19.025	191.253	21.005	16.8251	21.1192	16.3862	1621.69	307.993	37.4618	73.0138	860.578	128.478	653.283	136.538
MPI-ESM_GLAC1D	15	-20.4112	23.3011	367.689	25.4727	20.2848	27.656	18.3549	340.101	136.381	0.0241022	158.336	280.53	0.358326	81.3286	0.91807
MPI-ESM_GLAC1D	18.75	-20.4112	21.6759	428.028	23.3067	18.8492	26.4994	16.308	612.541	183.376	0.344031	119.558	434.547	1.40223	240.31	14.6192
MPI-ESM_GLAC1D	22.5	-20.4112	21.1126	370.157	22.7657	18.9228	24.3803	16.2741	679.35	163.002	0.712315	111.742	488.676	3.58741	372.916	15.6779
MPI-ESM_GLAC1D	26.25	-20.4112	20.5119	323.451	21.4916	16.3276	24.0752	16.114	558.782	130.839	0.723782	112.317	389.6	4.07183	120.703	9.15142
MPI-ESM_GLAC1D	30	-20.4112	19.0971	298.474	20.765	17.5823	21.3523	14.9479	660.436	138.429	3.05603	98.7279	410.924	14.2572	371.305	24.3913
MPI-ESM_GLAC1D	33.75	-20.4112	20.38	273.363	23.0287	18.2301	23.0287	16.6681	919.835	169.304	13.9702	77.9416	495.43	51.2295	495.43	60.0446
MPI-ESM_GLAC1D	45	-20.4112	22.7015	205.18	24.0033	20.9156	24.8269	19.9708	1086.27	246.167	5.21836	102.656	715.081	17.7865	539.561	18.9101
MPI-ESM_GLAC1D	120	-20.4112	26.2327	428.492	28.2709	21.9892	30.7885	20.2879	655.545	179.22	0.244152	127.035	532.325	1.84598	325.409	2.69303
MPI-ESM_GLAC1D	123.75	-20.4112	25.8921	451.173	28.0528	25.7879	30.4155	19.6212	641.416	176.076	0.312611	125.978	516.667	2.79329	340.177	3.65221
MPI-ESM_GLAC1D	127.5	-20.4112	25.7617	491.905	28.823	21.3466	30.4402	18.8946	531.749	145.75	0.448134	123.862	422.952	2.92662	295.486	4.46758
MPI-ESM_GLAC1D	131.25	-20.4112	25.1561	544.89	29.1635	20.2652	30.4122	17.6297	488.014	132.477	1.10312	122.502	384.522	4.36385	277.384	5.90771
MPI-ESM_GLAC1D	135	-20.4112	25.5208	581.389	30.2631	17.4923	30.7348	17.4923	473.317	126.555	1.9975	118.939	367.375	7.15751	352.635	7.15751
MPI-ESM_GLAC1D	138.75	-20.4112	26.4349	579.844	31.7813	18.3614	32.0649	18.3614	350.691	84.0169	3.21302	104.807	245.22	11.5835	237.967	11.5835
MPI-ESM_GLAC1D	142.5	-20.4112	25.5721	506.319	30.4747	19.2201	30.6052	18.463	394.897	88.9685	4.84144	97.0471	254.105	16.7673	255.085	16.852
MPI-ESM_GLAC1D	146.25	-20.4112	23.6971	385.126	27.4219	18.946	27.4219	18.2449	548.344	118.929	6.70681	91.4583	338.308	23.0162	338.308	23.5601
MPI-ESM_GLAC1D	-67.5	-20.4112	12.493	295.825	14.2279	12.1466	15.4828	8.66156	431.66	131.022	3.53563	121.556	317.322	12.5333	244.466	19.1875
MPI-ESM_GLAC1D	-63.75	-20.4112	13.5005	296.063	15.7566	9.78136	16.6563	9.55732	1184.57	243.443	17.0401	86.1666	704.524	58.1225	575.712	63.9251
MPI-ESM_GLAC1D	-60	-20.4112	20.5608	253.652	23.0688	17.0971	23.0688	17.0971	1409.21	205.6	43.178	49.4425	603.182	149.243	603.182	149.243
MPI-ESM_GLAC1D	-56.25	-20.4112	23.728	271.881	26.1719	19.8849	26.3852	19.8849	975.804	161.265	19.1066	62.7156	472.209	70.8208	457.211	70.8208
MPI-ESM_GLAC1D	-52.5	-20.4112	19.7236	262.549	22.1784	16.2188	22.3533	16.0151	1560.06	283.92	16.3506	78.2432	845.075	57.4249	805.177	66.4229
MPI-ESM_GLAC1D	-48.75	-20.4112	17.3333	238.666	19.8679	14.2806	19.8679	13.9669	1764.33	312.847	15.6205	78.4826	911.484	58.8387	911.484	64.2202
MPI-ESM_GLAC1D	-45	-20.4112	18.0228	220.55	20.6283	15.3184	20.6283	14.9799	1687.28	314.342	15.7315	79.8788	892.53	60.3105	892.53	61.4065
MPI-ESM_GLAC1D	-41.25	-20.4112	20.1753	190.65	22.4805	17.5567	22.3145	17.5567	1656.41	316.009	18.8172	83.2748	881.638	65.4696	765.121	65.4696
MPI-ESM_GLAC1D	15	-24.1223	21.1525	390.606	23.6032	19.1622	25.9095	15.9604	231.154	96.8231	0.225104	156.422	202.023	1.16087	94.5347	4.32681
MPI-ESM_GLAC1D	18.75	-24.1223	20.9409	520.091	22.4586	16.3987	27.4425	14.172	345.022	105.806	0.64593	129.709	254.633	3.62392	97.2861	7.72442
MPI-ESM_GLAC1D	22.5	-24.1223	19.6328	491.77	22.5684	15.9045	24.9828	13.1297	467.89	129.644	2.34915	104.02	301.808	8.52436	245.009	14.2642
MPI-ESM_GLAC1D	26.25	-24.1223	17.9065	368.595	20.4434	12.9969	21.3198	12.8451	661.658	127.044	4.95961	87.3943	378.626	19.9288	337.857	30.5369
MPI-ESM_GLAC1D	30	-24.1223	17.4791	252.302	19.6944	14.1531	19.504	13.9558	998.765	166.676	13.9796	71.581	473.422	52.3794	483.603	68.2623
MPI-ESM_GLAC1D	33.75	-24.1223	20.6014	213.792	23.0808	17.6889	23.0808	17.6889	1132.41	172.009	23.9631	59.9075	510.067	89.4581	510.067	89.4581
MPI-ESM_GLAC1D	112.5	-24.1223	24.3468	495.008	30.2279	20.6466	30.2279	18.1017	170.619	56.1699	0.0196944	146.732	151.255	0.374777	151.255	3.0463
MPI-ESM_GLAC1D	116.25	-24.1223	24.9275	637.908	31.3783	21.2013	32.2201	16.409	218.576	67.6885	0.0193119	141.654	187.21	0.603163	198.001	2.73422
MPI-ESM_GLAC1D	120	-24.1223	23.9884	685.788	29.7487	20.9982	31.4054	14.5841	374.726	117.494	0.0778888	139.201	305.931	1.05688	256.497	4.09567
MPI-ESM_GLAC1D	123.75	-24.1223	23.7397	676.106	29.2624	21.228	30.7237	14.4051	363.004	109.33	0.257284	132.758	276.56	1.7982	263.209	5.35109
MPI-ESM_GLAC1D	127.5	-24.1223	23.9938	686.61	30.9336	21.435	30.9336	14.6446	273.844	78.1979	0.613309	124.053	233.884	2.80834	233.884	6.31888
MPI-ESM_GLAC1D	131.25	-24.1223	23.8445	715.424	31.5489	21.1049	31.5489	14.2801	214.446	62.1975	1.28183	116.699	177.613	4.06452	177.613	7.97729
MPI-ESM_GLAC1D	135	-24.1223	24.193	722.236	32.1875	21.3322	32.1875	14.5626	218.744	59.0758	1.48498	111.386	170.257	5.7336	170.257	7.70296
MPI-ESM_GLAC1D	138.75	-24.1223	25.0564	704.209	32.9239	22.2436	32.9239	15.5932	212.941	53.5783	2.3407	99.9509	151.029	9.44055	151.029	9.53755
MPI-ESM_GLAC1D	142.5	-24.1223	24.7446	667.316	32.0228	16.5391	32.0228	15.6844	258.226	61.9428	4.21425	95.7083	172.873	15.3391	172.873	15.5766
MPI-ESM_GLAC1D	146.25	-24.1223	23.2858	604.096	29.6687	15.7656	29.6687	15.0418	335.609	73.095	4.65024	85.0109	205.181	22.9004	205.181	26.3529
MPI-ESM_GLAC1D	150	-24.1223	22.8912	499.473	28.2032	16.8334	28.2032	15.9982	420.042	83.7937	5.80119	78.211	232.563	30.9773	232.563	35.396
MPI-ESM_GLAC1D	-67.5	-24.1223	14.1538	393.483	17.7657	14.8318	18.3288	9.04698	191.939	49.2854	1.74947	87.4067	115.932	9.32587	108.749	28.8826
MPI-ESM_GLAC1D	-63.75	-24.1223	15.3299	387.319	19.1133	10.2078	19.6261	10.2078	472.726	117.086	6.60101	103.091	348.565	20.5632	305.534	20.5632
MPI-ESM_GLAC1D	-60	-24.1223	21.0356	336.452	24.714	16.4702	24.696	16.4702	1211.79	179.219	35.3509	53.5559	527.835	119.277	488.473	119.277
MPI-ESM_GLAC1D	-56.25	-24.1223	23.4917	355.536	27.6196	18.7169	27.629	18.7169	873.139	117.296	26.0347	50.341	349.023	90.9057	342.046	90.9057
MPI-ESM_GLAC1D	-52.5	-24.1223	19.8716	296.13	23.3132	16.2897	23.3132	15.9005	1227.08	207.41	26.5552	61.2706	578.36	89.4483	578.36	101.545
MPI-ESM_GLAC1D	-48.75	-24.1223	18.1808	217.55	20.8119	15.6185	20.8119	15.2273	1610.21	272.519	24.1661	67.4725	805.794	87.257	805.794	101.994
MPI-ESM_GLAC1D	18.75	-27.8334	19.0216	558.71	22.7412	24.6349	25.7774	11.8133	128.176	31.1394	0.843942	94.2799	80.8807	4.82665	25.5491	24.621
MPI-ESM_GLAC1D	22.5	-27.8334	17.8117	601.283	20.736	12.3557	24.683	9.9363	222.317	48.2466	4.71184	78.3218	125.346	17.2308	87.1661	25.4871
MPI-ESM_GLAC1D	26.25	-27.8334	16.9188	460.084	20.7793	10.7957	21.9974	10.7957	608.181	117.326	8.65366	70.6491	296.802	30.9496	304.171	30.9496
MPI-ESM_GLAC1D	30	-27.8334	17.8753	264.978	21.1104	14.2638	21.0541	14.2638	1205.53	175.802	21.034	60.499	522.703	78.2586	511.917	78.2586
MPI-ESM_GLAC1D	116.25	-27.8334	21.4105	688.883	29.6537	20.4672	29.6537	12.8094	103.265	29.5161	0.11107	103.441	72.3231	1.50048	72.3231	19.2322
MPI-ESM_GLAC1D	120	-27.8334	21.2493	788.499	30.03	21.2276	31.1582	11.062	141.183	40.6412	0.503192	113.111	103.39	1.6165	115.269	14.2534
MPI-ESM_GLAC1D	123.75	-27.8334	21.3955	765.286	29.6999	17.1043	30.8151	11.3582	134.143	42.5312	0.18301	118.771	100.334	1.92527	113.33	8.47246
MPI-ESM_GLAC1D	127.5	-27.8334	21.7461	741.756	29.8581	17.7176	30.972	12.0535	117.509	37.2079	0.400652	113.275	83.6808	2.36462	94.1936	7.19946
MPI-ESM_GLAC1D	131.25	-27.8334	21.7308	742.118	31.0684	17.8699	31.0684	12.1166	101.003	28.6829	0.40201	100.118	75.4641	3.21053	75.4641	7.9364
MPI-ESM_GLAC1D	135	-27.8334	21.9645	732.446	31.2136	18.2566	31.2136	12.5138	101.122	23.7073	0.484048	88.9762	70.3318	4.26714	70.3318	9.67934
MPI-ESM_GLAC1D	138.75	-27.8334	22.4121	740.946	31.7325	18.726	31.7325	12.8705	109.585	25.9947	1.18682	83.3857	73.9041	6.7207	73.9041	10.666
MPI-ESM_GLAC1D	142.5	-27.8334	22.4092	775.288	31.8744	18.8634	31.8744	12.3465	159.07	36.2119	3.59925	80.9371	103.445	14.6099	103.445	15.6243
MPI-ESM_GLAC1D	146.25	-27.8334	21.6567	771.626	30.6342	12.3718	30.6342	11.4845	212.199	45.1143	4.40718	76.3641	129.495	20.8688	129.495	23.4685
MPI-ESM_GLAC1D	150	-27.8334	21.6538	655.553	28.9545	13.7676	28.9545	12.8185	318.796	71.1047	5.34336	78.9525	199.473	28.1257	199.473	31.7527
MPI-ESM_GLAC1D	153.75	-27.8334	22.131	469.349	27.3568	16.694	27.3568	15.7143	543.183	113.512	9.78246	77.6433	319.616	41.7149	319.616	45.4069
MPI-ESM_GLAC1D	-67.5	-27.8334	14.5101	593.3	7.97659	20.4994	21.7585	7.2781	155.673	31.7421	1.4296	65.8529	75.6628	15.4259	38.5558	72.6365
MPI-ESM_GLAC1D	-63.75	-27.8334	17.6577	554.804	23.2533	10.5717	24.1901	10.5717	276.002	55.3802	6.93494	74.8124	146.072	23.1477	166.077	23.1477
MPI-ESM_GLAC1D	-60	-27.8334	22.8965	500.081	28.7739	17.0391	28.9174	16.3126	668.384	110.748	16.9494	61.7115	309.587	57.2256	279.035	58.3513
MPI-ESM_GLAC1D	-56.25	-27.8334	23.6248	484.972	28.3334	18.0039	29.6875	17.3191	631.244	90.5097	21.7284	47.0319	251.22	74.4412	208.672	76.9033
MPI-ESM_GLAC1D	-52.5	-27.8334	20.3164	400.922	25.405	15.8861	25.405	15.2117	918.188	124.554	31.5587	43.0716	333.941	106.425	333.941	121.778
MPI-ESM_GLAC1D	-48.75	-27.8334	19.4381	239.21	22.5235	17.2976	22.5235	16.4526	1380.49	224.087	30.8111	56.2725	625.594	108.368	625.594	129.831
MPI-ESM_GLAC1D	18.75	-31.5445	17.5693	449.206	12.625	22.1046	22.9011	11.8621	137.044	29.8686	0.726347	79.4297	75.5801	3.03042	13.2755	67.355
MPI-ESM_GLAC1D	22.5	-31.5445	17.1443	501.863	13.8931	22.7517	23.2416	10.6733	215.709	31.0185	3.94016	49.2256	87.0618	16.7423	32.8046	66.1467
MPI-ESM_GLAC1D	26.25	-31.5445	17.6144	411.327	22.1823	12.3328	22.8575	12.3328	479.727	73.0143	15.2434	47.6777	195.353	50.7565	183.062	50.7565
MPI-ESM_GLAC1D	116.25	-31.5445	17.6159	544.804	11.0574	22.0359	24.5137	11.0574	104.167	27.3308	0.665168	93.3156	67.056	3.82013	13.1528	67.056
MPI-ESM_GLAC1D	120	-31.5445	18.2558	614.19	10.5685	23.5268	25.7227	10.5685	78.7899	15.484	0.452385	67.5741	38.2481	7.00255	23.4456	38.2481
MPI-ESM_GLAC1D	123.75	-31.5445	18.6229	575.008	25.4922	18.0798	25.4922	11.2482	71.0273	14.9855	0.609596	63.5275	31.1385	3.14161	31.1385	24.0882
MPI-ESM_GLAC1D	127.5	-31.5445	18.796	540.021	25.1823	18.406	25.1823	11.7794	63.7604	11.8141	0.62074	54.4203	27.9147	2.93318	27.9147	19.178
MPI-ESM_GLAC1D	131.25	-31.5445	18.6577	546.786	25.0378	18.4756	25.0378	11.5476	63.5162	11.7011	0.786022	54.582	28.6687	3.23613	28.6687	18.0423
MPI-ESM_GLAC1D	135	-31.5445	18.7327	572.057	25.379	18.6788	26.1752	11.3621	73.5328	11.8375	0.873266	47.4609	30.5922	5.34962	31.2293	19.8647
MPI-ESM_GLAC1D	138.75	-31.5445	18.8314	632.373	26.1778	18.8226	27.1062	10.8067	93.2043	14.3606	1.40163	43.5193	36.6184	9.45577	38.6436	25.3336
MPI-ESM_GLAC1D	142.5	-31.5445	18.275	721.885	26.4805	14.5255	27.5795	9.12445	128.87	18.6201	3.76085	38.6893	48.5788	18.0433	54.6755	34.1778
MPI-ESM_GLAC1D	146.25	-31.5445	17.6321	743.375	26.8881	13.9825	26.8881	8.04373	197.732	29.7461	8.11927	42.167	88.8663	30.7243	88.8663	41.7176
MPI-ESM_GLAC1D	150	-31.5445	17.9389	627.944	25.4642	10.64	25.4642	9.63878	336.52	65.0943	8.61774	71.5264	192.668	32.7792	192.668	35.3811
MPI-ESM_GLAC1D	-71.25	-31.5445	13.4077	625.306	7.15042	21.0814	21.0814	6.28396	368.24	89.5622	2.48615	99.2486	222.513	10.1282	10.1282	213.918
MPI-ESM_GLAC1D	-67.5	-31.5445	13.3818	743.398	5.45771	22.5356	22.9694	4.56586	199.56	42.9598	2.93303	80.5433	108.824	18.1707	23.7758	106.104
MPI-ESM_GLAC1D	-63.75	-31.5445	18.2658	698.523	27.0469	10.543	27.0469	9.58539	307.475	51.7862	9.89739	59.5955	153.469	30.9142	153.469	31.1877
MPI-ESM_GLAC1D	-60	-31.5445	23.2498	626.775	30.7921	16.2298	31.1029	15.1948	379.548	68.8814	9.62004	65.6503	179.496	30.5092	157.478	32.6453
MPI-ESM_GLAC1D	-56.25	-31.5445	22.8382	569.796	29.7029	16.5814	30.0697	15.5437	433.786	61.1332	15.7632	45.7926	157.658	48.9818	147.629	57.8467
MPI-ESM_GLAC1D	-52.5	-31.5445	19.705	453.124	18.9359	15.0729	25.5456	14.0463	722.882	82.8153	30.696	37.0367	244.404	97.8886	242.472	112.621
MPI-ESM_GLAC1D	116.25	-35.2556	14.9653	354.414	10.6603	19.7312	19.4122	10.6603	259.992	59.5183	3.32776	90.3355	156.287	11.4131	14.9107	156.287
MPI-ESM_GLAC1D	138.75	-35.2556	15.5835	414.614	10.3679	20.6765	20.6765	10.3679	253.678	48.4837	6.22639	72.8902	135.831	22.027	22.027	135.831
MPI-ESM_GLAC1D	142.5	-35.2556	15.0913	501.805	8.73513	21.6758	21.0918	8.73513	271.647	52.9872	9.18813	72.7957	145.835	27.7771	28.9305	145.835
MPI-ESM_GLAC1D	146.25	-35.2556	14.3769	524.028	7.67068	19.0704	21.1439	7.67068	285.859	43.646	14.1874	44.1329	121.668	50.9073	56.9967	121.668
MPI-ESM_GLAC1D	-71.25	-35.2556	9.99574	562.241	4.7012	17.1915	17.1915	3.78005	730.26	143.065	8.45851	80.8255	382.782	34.1588	34.1588	364.402
MPI-ESM_GLAC1D	-67.5	-35.2556	11.1349	705.389	3.80732	19.5918	20.5222	2.93761	271.93	47.443	6.21568	65.9569	129.841	20.3875	20.9833	124.617
MPI-ESM_GLAC1D	-63.75	-35.2556	16.2133	695.341	25.2526	8.62502	25.2526	7.73708	280.062	38.1082	9.60265	44.1297	109.82	35.3979	109.82	37.716
MPI-ESM_GLAC1D	-60	-35.2556	20.4572	623.254	28.0805	13.6537	28.4838	12.6531	269.015	40.0398	7.85028	54.7314	113.918	28.9071	109.66	29.8819
MPI-ESM_GLAC1D	-56.25	-35.2556	19.8366	537.474	26.2569	17.2095	26.8125	13.1414	404.28	50.8709	16.2631	42.4576	149.254	52.4339	147.943	59.5641
MPI-ESM_GLAC1D	-71.25	-38.9666	8.00713	415.326	4.26695	13.3646	13.3646	3.44998	1231.92	189.928	30.1371	59.3959	539.463	97.9764	97.9764	513.887
MPI-ESM_GLAC1D	-67.5	-38.9666	9.56198	562.325	3.8581	16.3952	17.1908	3.08604	385.303	51.7897	12.5918	44.3275	147.828	41.3172	44.1586	138.474
MPI-ESM_GLAC1D	-63.75	-38.9666	13.5641	577.405	12.8415	10.1131	21.226	6.64594	257.225	29.2504	15.3292	19.741	81.607	51.0068	70.0742	53.0226
MPI-ESM_GLAC1D	-60	-38.9666	16.2996	516.682	23.0957	13.5148	23.0957	10.0008	296.345	39.9888	12.4017	37.8505	118.688	42.9452	118.688	46.6654
MPI-ESM_GLAC1D	146.25	-42.6776	10.5576	267.959	8.33476	13.1995	14.0241	7.41287	980.679	100.333	48.054	23.309	299.952	161.323	171.376	286.689
MPI-ESM_GLAC1D	172.5	-42.6776	10.1891	285.122	12.3451	11.2554	13.821	6.83474	1270.62	125.997	83.8984	14.508	369.231	262.644	311.94	295.937
MPI-ESM_GLAC1D	-71.25	-42.6776	7.20293	353.567	3.83271	11.597	11.597	3.10883	1681.06	198.264	81.6634	31.6159	582.865	256.771	256.771	559.498
MPI-ESM_GLAC1D	-67.5	-42.6776	8.58265	443.81	4.0775	13.9043	14.5365	3.34776	496.834	54.5723	22.9062	25.1291	155.797	82.2926	93.0133	148.869
MPI-ESM_GLAC1D	-75	-46.3886	6.66192	289.288	5.44644	10.2474	10.2474	3.22797	2470.19	235.188	174.599	9.22894	679.202	540.063	540.063	649.685
MPI-ESM_GLAC1D	-71.25	-46.3886	5.53285	331.781	3.90477	9.48182	9.83468	1.48448	1883.54	175.901	139.363	6.63989	507.547	432.667	445.725	483.462
MPI-ESM_GLAC1D	-67.5	-46.3886	6.63425	369.849	11.0922	2.60702	11.4148	2.1225	797.045	85.9262	56.0817	16.3161	256.753	173.256	240.846	178.948
MPI-ESM_GLAC1D	-75	-50.0995	5.34812	293.067	9.20382	2.19361	9.20382	1.77485	2247.89	213.462	155.443	13.3095	633.39	468.942	633.39	471.175
MPI-ESM_GLAC1D	-71.25	-50.0995	4.55498	324.454	8.72986	1.08684	8.72986	0.532658	1715.45	178.973	110.721	18.1989	523.001	336.736	523.001	340.986
MPI-ESM_GLAC1D	-71.25	-53.8103	4.89939	314.731	9.08533	1.05414	9.08533	1.05414	1373.16	156.82	80.7901	25.1777	457.718	245.167	457.718	245.167
MPI-ESM_GLAC1D	-67.5	-53.8103	5.21449	324.567	9.48767	1.24164	9.48767	1.24164	1168.63	148.476	67.7043	30.2153	424.385	204.863	424.385	204.863
MPI-ESM_GLAC1D	-60	-64.9419	-5.88528	586.546	-0.622758	1.21266	1.35161	-12.99	531.183	54.9268	38.5561	11.1176	155.493	121.505	145.795	125.701
MPI-ESM_GLAC1D	41.25	-68.652	-18.4992	613.706	-18.1262	-9.69945	-9.64969	-25.3975	448.736	56.5012	20.4526	33.8434	165.806	66.5842	86.7351	103.289
MPI-ESM_GLAC1D	45	-68.652	-22.2466	655.753	-22.242	-12.6506	-12.7955	-29.4919	419.783	54.1251	19.8803	35.4277	158.321	65.0526	86.7269	91.7045
MPI-ESM_GLAC1D	48.75	-68.652	-25.1057	692.67	-25.4634	-17.1933	-15.1093	-32.6124	392.248	49.9523	19.8249	32.4775	142.772	64.0022	87.896	85.3931
MPI-ESM_GLAC1D	52.5	-68.652	-26.4377	716.722	-22.7888	-18.095	-16.0742	-34.0935	373.334	45.7126	20.1672	27.0237	129.362	67.8839	90.3133	82.5518
MPI-ESM_GLAC1D	56.25	-68.652	-25.9116	726.265	-22.3018	-17.4016	-15.3626	-33.6221	389.994	44.9864	23.4414	21.2836	129.582	80.3099	101.007	86.5233
MPI-ESM_GLAC1D	60	-68.652	-23.826	719.197	-20.169	-15.4634	-13.3268	-31.4991	410.42	45.4625	26.6515	18.2326	132.284	88.0222	105.673	91.8961
MPI-ESM_GLAC1D	63.75	-68.652	-20.8508	701.966	-17.0798	-10.3127	-10.5416	-28.4281	409.765	45.4349	27.2867	18.3142	131.423	87.1808	99.9539	92.6011
MPI-ESM_GLAC1D	67.5	-68.652	-17.8688	683.013	-17.9322	-7.78343	-7.82417	-25.3721	391.006	46.0977	23.424	23.8857	131.353	72.0558	86.056	87.6796
MPI-ESM_GLAC1D	78.75	-68.652	-16.058	592.876	-15.8358	-7.40257	-7.38472	-22.7491	339.324	43.6836	18.0176	28.8998	117.983	54.6111	68.268	79.5263
MPI-ESM_GLAC1D	82.5	-68.652	-17.8262	583.556	-17.5917	-9.31664	-9.32938	-24.4281	379.64	49.6459	20.9461	30.082	132.676	63.318	78.8468	84.8698
MPI-ESM_GLAC1D	86.25	-68.652	-20.4558	588.468	-20.4588	-11.7489	-11.8763	-27.0076	402.634	50.6403	23.404	26.918	135.739	73.2005	87.5141	88.9122
MPI-ESM_GLAC1D	90	-68.652	-23.1091	604.278	-19.9613	-25.051	-14.2395	-29.6456	422.834	49.8149	25.1626	22.6358	136.126	81.0452	97.3129	94.4247
MPI-ESM_GLAC1D	93.75	-68.652	-25.1652	623.554	-22.2399	-26.8915	-15.957	-31.6736	442.187	48.4364	26.8906	18.5151	136.65	87.4288	107.441	101.987
MPI-ESM_GLAC1D	97.5	-68.652	-26.2217	639.111	-23.4769	-18.5696	-16.7324	-32.6846	470.385	48.526	28.6697	15.9926	140.375	97.5738	119.484	112.91
MPI-ESM_GLAC1D	101.25	-68.652	-26.3045	647.685	-23.6247	-18.494	-16.6614	-32.7374	509.715	51.4746	30.9101	15.7152	149.423	104.911	131.244	126.251
MPI-ESM_GLAC1D	105	-68.652	-25.7733	649.341	-27.0363	-17.9524	-16.0905	-32.2087	546.795	56.1459	33.2871	16.735	160.318	109.843	137.098	138.579
MPI-ESM_GLAC1D	108.75	-68.652	-25.056	646.746	-26.1919	-17.3124	-15.4147	-31.5121	567.426	60.1538	34.2279	18.3451	171.821	110.75	134.339	145.621
MPI-ESM_GLAC1D	112.5	-68.652	-24.482	643.821	-25.4341	-16.83	-14.9173	-30.9906	571.013	62.0326	33.3925	20.3895	177.785	107.606	126.564	148.122
MPI-ESM_GLAC1D	116.25	-68.652	-24.2282	644.676	-25.0187	-16.6132	-14.7128	-30.8266	562.761	61.4417	32.2401	22.1847	178.56	103.433	118.254	146.326
MPI-ESM_GLAC1D	120	-68.652	-24.321	651.099	-25.0077	-16.6548	-14.7942	-31.0453	553.453	60.7771	31.1926	22.816	176.126	101.885	114.531	144.026
MPI-ESM_GLAC1D	123.75	-68.652	-24.668	663.194	-25.3325	-16.8658	-15.0462	-31.5408	548.799	59.7519	31.4272	22.1754	172.761	103.027	115.309	142.522
MPI-ESM_GLAC1D	127.5	-68.652	-25.1167	680.066	-25.8176	-17.1145	-15.2981	-32.1605	551.062	59.1049	32.7462	20.8341	171.151	106.339	120.855	140.425
MPI-ESM_GLAC1D	131.25	-68.652	-25.4815	699.221	-26.242	-17.2714	-15.4049	-32.7055	552.344	60.2217	33.799	19.7481	169.112	108.984	127.931	137.387
MPI-ESM_GLAC1D	135	-68.652	-25.5772	717.069	-21.919	-17.1991	-15.2434	-32.9854	554.533	61.186	34.8584	19.3746	169.482	111.261	135.925	134.584
MPI-ESM_GLAC1D	138.75	-68.652	-25.252	732.536	-21.4131	-16.7714	-14.6946	-32.8591	561.29	61.6168	34.9359	19.1047	171.99	114.626	144.106	133.817
MPI-ESM_GLAC1D	142.5	-68.652	-24.4105	746.137	-20.337	-15.8834	-13.6477	-32.2309	575.469	61.8121	35.8139	18.1772	175.105	120.57	152.565	136.473
MPI-ESM_GLAC1D	146.25	-68.652	-23.0366	758.933	-18.6612	-25.3811	-12.1022	-31.0935	599.749	65.1211	37.9664	17.5344	182.861	118.442	162.827	141.244
MPI-ESM_GLAC1D	150	-68.652	-21.1577	776.094	-16.3676	-23.6852	-10.028	-29.5219	663.123	77.7271	42.6129	20.2732	214.154	130.672	187.669	148.604
MPI-ESM_GLAC1D	-67.5	-68.652	-10.1537	576.518	-6.00232	-2.5139	-2.41792	-17.2074	537.422	54.2023	38.5991	10.6163	152.21	117.56	125.529	130.506
MPI-ESM_GLAC1D	-63.75	-68.652	-10.9042	601.327	-6.65857	-2.90648	-2.84501	-18.2035	543.578	55.8778	38.1939	12.5089	158.493	118.074	130.233	129.468
MPI-ESM_GLAC1D	0	-72.3616	-23.584	651.923	-23.8254	-13.7183	-14.0436	-30.7576	346.137	42.0883	17.7095	27.5078	121.16	62.093	76.84	76.7593
MPI-ESM_GLAC1D	3.75	-72.3616	-25.5492	669.98	-25.9419	-17.7479	-15.7545	-32.8526	327.616	39.0376	18.0162	27.2166	114.507	58.9229	76.9709	70.5449
MPI-ESM_GLAC1D	7.5	-72.3616	-26.8172	680.095	-27.2961	-18.8456	-16.8769	-34.1762	320.245	37.935	18.4836	26.0511	110.185	60.2167	78.5082	68.4378
MPI-ESM_GLAC1D	11.25	-72.3616	-27.3739	682.545	-27.8573	-19.369	-17.3958	-34.7309	323.957	38.1371	19.6402	24.5645	109.151	63.6081	82.1713	69.1298
MPI-ESM_GLAC1D	15	-72.3616	-27.3895	678.932	-27.8221	-19.4641	-17.4576	-34.6977	334.645	38.8461	20.4739	23.6228	111.574	66.671	85.2337	71.9999
MPI-ESM_GLAC1D	18.75	-72.3616	-27.1442	673.607	-27.5057	-19.3397	-17.2727	-34.3923	346.158	39.4486	21.1904	23.453	115.374	68.9353	87.5144	74.8195
MPI-ESM_GLAC1D	22.5	-72.3616	-27.0225	668.96	-27.354	-19.3254	-17.1966	-34.2061	349.621	40.5196	21.0816	24.8912	118.509	68.1118	87.0063	75.0336
MPI-ESM_GLAC1D	26.25	-72.3616	-27.4077	670.272	-27.7928	-19.718	-17.5266	-34.5603	340.645	41.431	19.988	27.2679	118.216	64.8684	84.359	71.3868
MPI-ESM_GLAC1D	30	-72.3616	-28.5715	679.909	-29.1249	-30.7216	-18.5182	-35.7393	317.381	40.6869	18.3817	29.7283	112.441	56.8999	80.9114	63.5872
MPI-ESM_GLAC1D	33.75	-72.3616	-30.5725	698.845	-27.2458	-32.5979	-20.2187	-37.8201	284.089	38.1896	16.4055	32.1423	104.946	49.852	76.149	53.9048
MPI-ESM_GLAC1D	37.5	-72.3616	-33.23	726.305	-30.0381	-35.0784	-22.4791	-40.6215	244.011	33.856	13.8445	33.9551	92.9597	41.9348	68.1545	44.6684
MPI-ESM_GLAC1D	41.25	-72.3616	-36.1037	760.223	-33.07	-37.7516	-24.8808	-43.6983	207.145	28.9912	11.6023	34.0773	79.5477	35.4801	58.3186	37.8203
MPI-ESM_GLAC1D	45	-72.3616	-38.6099	794.858	-35.7308	-40.0634	-26.9257	-46.4301	181.55	25.0691	10.1646	32.463	68.8097	31.7417	49.8878	33.9493
MPI-ESM_GLAC1D	48.75	-72.3616	-40.2238	822.995	-37.4808	-41.5263	-28.1666	-48.2453	164.162	22.1632	9.22482	29.9127	60.5918	29.5075	43.361	35.6146
MPI-ESM_GLAC1D	52.5	-72.3616	-40.6174	839.183	-37.9802	-41.8173	-28.3496	-48.7779	156.351	20.2761	9.08251	26.6075	55.639	29.528	39.47	34.8312
MPI-ESM_GLAC1D	56.25	-72.3616	-39.6807	843.084	-37.0772	-40.8564	-27.3639	-47.8834	160.049	20.0684	9.62437	24.0906	55.2713	31.5579	39.2606	35.9924
MPI-ESM_GLAC1D	60	-72.3616	-37.6537	836.845	-34.9554	-24.2626	-25.414	-45.8461	171.495	20.9957	10.4394	22.7248	57.9272	35.8496	41.0478	36.4048
MPI-ESM_GLAC1D	63.75	-72.3616	-35.1214	821.541	-32.2543	-22.0608	-23.0937	-43.3142	183.049	22.5589	11.0827	23.4677	61.9373	37.2412	43.1993	38.9709
MPI-ESM_GLAC1D	67.5	-72.3616	-32.7578	801.057	-34.4803	-20.1265	-21.0266	-40.9001	189.232	23.9719	11.1487	25.286	65.2094	37.9751	44.8927	39.5905
MPI-ESM_GLAC1D	71.25	-72.3616	-31.1053	780.728	-32.5591	-21.5735	-19.6751	-39.156	191.246	25.5334	10.9867	28.6725	68.1605	35.8644	45.6712	38.668
MPI-ESM_GLAC1D	75	-72.3616	-30.4173	766.944	-27.1495	-32.1832	-19.1764	-38.3793	195.716	27.3698	11.3288	30.6667	70.8814	34.6771	48.2727	38.003
MPI-ESM_GLAC1D	78.75	-72.3616	-30.8617	761.057	-27.583	-32.6637	-19.6796	-38.7276	196.165	27.8467	10.981	30.8144	71.5208	33.8653	51.6069	36.726
MPI-ESM_GLAC1D	82.5	-72.3616	-32.4198	765.592	-29.1508	-38.4823	-21.1679	-40.2413	194.4	27.1392	10.4917	30.3314	70.6494	33.2164	55.8953	35.3194
MPI-ESM_GLAC1D	86.25	-72.3616	-34.8042	781.351	-31.6123	-40.8039	-23.3203	-42.6234	185.707	24.7864	10.1402	28.8114	66.1156	31.9847	56.8822	33.9103
MPI-ESM_GLAC1D	90	-72.3616	-37.468	810.202	-34.3539	-43.4732	-25.5527	-45.4374	173.909	22.0104	9.97154	26.0973	60.119	31.215	53.7658	36.892
MPI-ESM_GLAC1D	93.75	-72.3616	-39.8866	847.038	-36.7966	-41.3766	-27.4257	-48.1731	163.071	19.6056	10.0009	22.5557	54.4901	30.8321	49.207	35.8445
MPI-ESM_GLAC1D	97.5	-72.3616	-41.6646	882.346	-38.5733	-43.1292	-28.651	-50.2492	157.142	17.9938	9.85564	19.2387	50.6127	30.8677	46.2364	35.8694
MPI-ESM_GLAC1D	101.25	-72.3616	-42.6688	903.676	-39.5902	-44.1253	-29.3105	-51.4205	156.145	17.4542	9.96585	16.907	48.833	31.5125	44.4702	36.85
MPI-ESM_GLAC1D	105	-72.3616	-42.8368	914.068	-39.7543	-44.2932	-29.3242	-51.6711	161.772	17.9179	10.4015	15.764	49.7605	33.0251	45.011	38.5815
MPI-ESM_GLAC1D	108.75	-72.3616	-42.4766	917.944	-39.3239	-43.9762	-28.9277	-51.3547	168.771	18.7238	10.8474	15.4174	51.5491	34.5732	45.5483	40.6039
MPI-ESM_GLAC1D	112.5	-72.3616	-41.944	917.441	-38.697	-30.509	-28.4498	-50.8384	172.63	19.0722	10.9943	15.6979	52.8338	38.49	45.2128	41.9773
MPI-ESM_GLAC1D	116.25	-72.3616	-41.499	913.632	-38.1651	-43.1135	-28.1302	-50.3847	170.948	18.7871	10.8134	16.0858	52.4731	34.7516	43.5579	42.0127
MPI-ESM_GLAC1D	120	-72.3616	-41.2648	906.486	-37.8962	-42.8844	-28.0703	-50.1028	164.87	18.0594	10.4478	16.3973	50.8217	33.259	41.5323	41.0269
MPI-ESM_GLAC1D	123.75	-72.3616	-41.2198	897.2	-37.8871	-42.7991	-28.2285	-49.981	158.399	17.5244	9.9895	17.2827	49.6904	31.3334	40.4337	39.3603
MPI-ESM_GLAC1D	127.5	-72.3616	-41.2567	886.302	-38.0114	-42.7587	-28.4668	-49.9192	153.504	17.2925	9.79627	18.2211	49.1878	30.0386	40.6418	37.5353
MPI-ESM_GLAC1D	131.25	-72.3616	-41.2097	874.802	-38.0954	-42.6227	-28.6048	-49.7479	151.455	17.1898	9.62506	19.6442	49.7909	29.3134	41.9497	35.9461
MPI-ESM_GLAC1D	135	-72.3616	-40.861	861.011	-37.9001	-42.1904	-28.4485	-49.244	152.894	18.4789	9.5566	21.7651	51.8146	29.5012	43.752	34.8692
MPI-ESM_GLAC1D	138.75	-72.3616	-39.9855	841.863	-37.2204	-41.2398	-27.804	-48.1464	158.483	19.9942	9.86567	23.2513	54.7009	30.8774	46.2275	34.8114
MPI-ESM_GLAC1D	142.5	-72.3616	-38.4623	819.866	-35.889	-44.2596	-26.5156	-46.3612	170.472	21.9664	10.4397	24.1338	59.2654	33.3052	50.4309	36.1814
MPI-ESM_GLAC1D	146.25	-72.3616	-36.2803	800.323	-33.8239	-43.7732	-24.5397	-43.9517	190.715	24.5432	11.5834	24.2073	66.1064	37.0612	56.519	39.3984
MPI-ESM_GLAC1D	150	-72.3616	-33.5532	789.896	-31.029	-40.9965	-21.8938	-41.1392	221.544	28.1107	13.3934	23.9667	76.1732	42.5526	65.6899	44.7473
MPI-ESM_GLAC1D	153.75	-72.3616	-30.4774	790.983	-27.7093	-38.0544	-18.7695	-38.1431	264.66	32.9715	15.9863	23.6096	89.7328	50.0839	79.1752	52.2809
MPI-ESM_GLAC1D	157.5	-72.3616	-27.2726	802.844	-24.0935	-35.1645	-15.4056	-35.1737	322.183	39.74	19.0509	23.8734	107.777	59.3407	98.4398	62.2082
MPI-ESM_GLAC1D	161.25	-72.3616	-24.1779	822.189	-20.4587	-32.5108	-12.1041	-32.5108	391.985	48.4007	22.4948	24.829	130.556	69.9702	122.838	69.9702
MPI-ESM_GLAC1D	165	-72.3616	-21.3181	852.508	-16.9574	-30.2224	-8.89579	-30.2224	474.254	59.0723	26.8782	25.8796	158.755	83.2714	151.858	83.2714
MPI-ESM_GLAC1D	168.75	-72.3616	-18.9592	881.937	-13.9554	-28.4444	-6.27079	-28.4444	533.269	65.265	30.7685	25.6303	181.039	95.2457	164.355	95.2457
MPI-ESM_GLAC1D	-97.5	-72.3616	-11.4289	760.328	-16.8698	-1.62718	-0.904252	-20.7042	459.454	49.5836	30.1252	13.6885	132.959	102.017	106.765	121.419
MPI-ESM_GLAC1D	-71.25	-72.3616	-14.8303	692.712	-14.5233	-4.96442	-5.20699	-22.9171	411.69	40.8128	27.0016	11.5033	114.808	89.7037	94.9077	104.355
MPI-ESM_GLAC1D	-67.5	-72.3616	-15.4396	713.414	-15.3788	-5.26716	-5.58785	-23.6332	413.8	41.3483	27.7467	10.932	117.473	92.9799	98.1752	102.293
MPI-ESM_GLAC1D	-63.75	-72.3616	-15.7272	731.304	-15.7954	-5.33552	-5.69722	-24.0342	426.992	42.8322	29.2575	11.5003	123.395	95.8018	101.713	103.284
MPI-ESM_GLAC1D	-11.25	-72.3616	-15.4146	563.735	-14.9406	-7.17862	-7.123	-21.8018	433.236	51.2585	17.928	25.5244	138.295	67.5838	82.5503	112.933
MPI-ESM_GLAC1D	-7.5	-72.3616	-18.2287	595.441	-17.9764	-9.46052	-9.51493	-24.9314	414.414	50.2366	17.6892	26.6277	138.509	65.9317	81.826	101.835
MPI-ESM_GLAC1D	-3.75	-72.3616	-21.0638	626.109	-21.0728	-11.7099	-11.9056	-28.0329	376.773	45.807	17.4565	27.0673	129.581	63.5438	78.7681	87.8809
MPI-ESM_GLAC1D	0	-76.0702	-36.5388	793.34	-33.503	-38.3303	-24.9681	-44.5889	172.116	22.887	9.9615	30.4346	63.6159	31.0243	47.6259	32.183
MPI-ESM_GLAC1D	3.75	-76.0702	-39.2307	825.13	-36.3096	-40.926	-27.205	-47.4737	144.214	19.0472	8.15908	29.8239	52.822	25.5698	39.6837	27.1698
MPI-ESM_GLAC1D	7.5	-76.0702	-41.348	853.424	-38.4476	-43.01	-28.9114	-49.8122	121.742	15.8759	6.94929	28.294	43.7133	21.6865	33.0063	23.4438
MPI-ESM_GLAC1D	11.25	-76.0702	-42.9204	876.66	-39.9763	-44.6025	-30.1334	-51.5902	104.627	13.315	6.03311	26.21	36.5779	18.8627	28.068	20.7425
MPI-ESM_GLAC1D	15	-76.0702	-44.0225	892.236	-46.175	-45.7353	-30.9947	-52.8376	92.5228	11.471	5.42105	24.1169	31.5822	16.9965	24.5708	18.802
MPI-ESM_GLAC1D	18.75	-76.0702	-44.7351	902.914	-46.8742	-46.4983	-31.5364	-53.6651	85.0726	10.2951	5.11587	22.1939	28.3891	15.936	22.7993	17.3781
MPI-ESM_GLAC1D	22.5	-76.0702	-45.2346	911.721	-42.0909	-47.0719	-31.8958	-54.2855	80.914	9.62016	5.00494	20.845	26.6048	15.3929	22.0649	16.3686
MPI-ESM_GLAC1D	26.25	-76.0702	-45.7098	922.077	-42.4502	-52.9029	-32.1992	-54.9099	78.4398	9.3183	4.80568	20.5453	25.8078	14.9874	21.7488	15.5714
MPI-ESM_GLAC1D	30	-76.0702	-46.3137	935.489	-42.9034	-53.6887	-32.5878	-55.7055	76.4711	9.17022	4.61449	21.1059	25.4574	14.399	21.8026	14.8472
MPI-ESM_GLAC1D	33.75	-76.0702	-47.0983	951.415	-43.5284	-54.6835	-33.1321	-56.7152	73.953	9.01667	4.41296	21.9878	25.0729	13.7443	21.4297	14.0846
MPI-ESM_GLAC1D	37.5	-76.0702	-48.0266	968.16	-44.3187	-55.8143	-33.8209	-57.8728	70.5496	8.75132	4.14195	22.8941	24.3463	12.9383	20.6671	13.2241
MPI-ESM_GLAC1D	41.25	-76.0702	-48.94	982.618	-45.1521	-56.8885	-34.5188	-58.9757	66.2232	8.29432	3.87856	23.4765	23.1647	12.0741	19.5354	12.3093
MPI-ESM_GLAC1D	45	-76.0702	-49.6711	992.15	-45.8949	-57.7049	-35.1002	-59.8077	60.8623	7.6112	3.58258	23.2806	21.3676	11.1733	17.8068	11.3638
MPI-ESM_GLAC1D	48.75	-76.0702	-50.0812	996.787	-46.3975	-58.1229	-35.414	-60.2315	55.6969	6.91967	3.31916	22.4482	19.4304	10.3993	16.0875	10.5426
MPI-ESM_GLAC1D	52.5	-76.0702	-50.0518	997.612	-46.5297	-52.2522	-35.3528	-60.1488	51.8086	6.28158	3.14878	20.8032	17.7238	9.87498	14.5459	10.0163
MPI-ESM_GLAC1D	56.25	-76.0702	-49.5541	994.761	-46.1944	-51.6793	-34.8782	-59.5785	50.1848	5.99786	3.06515	19.5331	16.8242	9.73421	13.7642	9.93077
MPI-ESM_GLAC1D	60	-76.0702	-48.6608	989.004	-45.4307	-50.7346	-34.0638	-58.602	51.2295	6.13504	3.06745	19.2867	16.996	9.93273	13.8538	10.2831
MPI-ESM_GLAC1D	63.75	-76.0702	-47.5539	980.934	-44.4131	-49.6096	-33.0423	-57.406	54.502	6.63444	3.16375	20.2622	18.1668	10.3798	15.1219	10.9028
MPI-ESM_GLAC1D	67.5	-76.0702	-46.4632	970.08	-43.3825	-48.5159	-32.0905	-56.2074	59.0221	7.32944	3.42853	21.4132	19.8609	11.0197	16.8121	11.5981
MPI-ESM_GLAC1D	71.25	-76.0702	-45.5565	960.948	-42.4841	-47.6318	-31.2858	-55.2074	64.1744	8.13971	3.75881	22.617	21.8176	11.753	18.929	12.2533
MPI-ESM_GLAC1D	75	-76.0702	-44.9743	957.861	-41.8565	-52.5832	-30.7018	-54.5805	69.3209	9.07207	3.9236	24.563	24.146	12.3888	21.0522	12.7194
MPI-ESM_GLAC1D	78.75	-76.0702	-44.8591	960.958	-41.6781	-52.4849	-30.524	-54.4659	73.2346	9.83716	4.02431	26.828	26.2008	12.6384	22.9979	12.9263
MPI-ESM_GLAC1D	82.5	-76.0702	-45.3015	972.1	-42.0485	-52.9693	-30.774	-54.9646	73.193	9.89988	3.98323	27.9335	26.495	12.4491	23.6444	12.6691
MPI-ESM_GLAC1D	86.25	-76.0702	-46.2383	991.808	-42.8728	-53.9947	-31.4205	-56.0349	69.3281	9.40124	3.83123	27.6942	25.1636	11.9004	22.3831	12.1135
MPI-ESM_GLAC1D	90	-76.0702	-47.5033	1020.7	-43.9659	-55.4289	-32.2929	-57.5447	63.031	8.52199	3.61725	25.9727	22.6927	11.1648	19.7252	11.4134
MPI-ESM_GLAC1D	93.75	-76.0702	-48.867	1055.53	-45.1078	-57.0324	-33.179	-59.2335	56.0561	7.40808	3.43382	23.0929	19.8275	10.511	16.5202	10.784
MPI-ESM_GLAC1D	97.5	-76.0702	-50.0632	1084.97	-46.1371	-52.3837	-34.0052	-60.7081	49.129	6.268	3.22242	19.5821	16.7961	9.80614	13.3369	10.1575
MPI-ESM_GLAC1D	101.25	-76.0702	-50.7992	1096.69	-46.8246	-37.1223	-34.5918	-61.5245	43.3041	5.22003	2.86152	16.6703	14.2642	9.0833	10.9793	9.56954
MPI-ESM_GLAC1D	105	-76.0702	-50.9766	1092.69	-47.0583	-37.3078	-34.8463	-61.6319	39.0058	4.43296	2.55566	13.9489	12.2848	8.19623	9.5308	9.03099
MPI-ESM_GLAC1D	108.75	-76.0702	-50.7235	1083.71	-46.8116	-37.1581	-34.7688	-61.3109	36.5587	3.94827	2.52005	11.7474	11.1754	7.97041	9.02224	8.56366
MPI-ESM_GLAC1D	112.5	-76.0702	-50.3072	1073.38	-46.3493	-36.8899	-34.5729	-60.8572	34.8254	3.64916	2.45076	10.6534	10.5244	7.76168	8.76266	8.13046
MPI-ESM_GLAC1D	116.25	-76.0702	-49.8822	1062.45	-45.8871	-36.6203	-34.3737	-60.4008	33.377	3.42349	2.39132	10.2894	10.0794	7.46581	8.45281	7.78179
MPI-ESM_GLAC1D	120	-76.0702	-49.5269	1048.21	-45.5505	-36.4381	-34.2747	-59.9776	32.1962	3.30725	2.30023	10.4394	9.77561	7.2002	8.32596	7.47288
MPI-ESM_GLAC1D	123.75	-76.0702	-49.1962	1031.2	-45.2933	-51.4072	-34.2408	-59.529	31.7742	3.28408	2.24195	10.727	9.72009	6.88959	8.34237	7.30062
MPI-ESM_GLAC1D	127.5	-76.0702	-48.7795	1008.22	-45.0114	-50.9033	-34.1946	-58.9164	32.7982	3.5082	2.25161	11.8832	10.2436	6.98015	8.82026	7.33234
MPI-ESM_GLAC1D	131.25	-76.0702	-48.1042	976.409	-44.5577	-55.8911	-34.0123	-57.9255	35.8622	3.94068	2.38868	13.4212	11.4336	7.48507	9.9915	7.74023
MPI-ESM_GLAC1D	135	-76.0702	-47.001	934.416	-43.7927	-54.425	-33.5169	-56.3702	41.9615	4.60736	2.69865	14.8118	13.5209	8.49362	11.8117	8.70454
MPI-ESM_GLAC1D	138.75	-76.0702	-45.4001	884.613	-42.6078	-52.369	-32.61	-54.2029	51.9785	5.899	3.23859	16.9609	17.0454	10.2964	14.7921	10.3929
MPI-ESM_GLAC1D	142.5	-76.0702	-43.3145	835.47	-40.9828	-51.5271	-31.177	-51.5271	67.4216	7.54915	4.03087	18.1931	21.9976	13.0831	19.5442	13.0831
MPI-ESM_GLAC1D	146.25	-76.0702	-40.7813	798.718	-38.8422	-48.5219	-29.0937	-48.5219	89.8067	10.1598	5.24428	19.5749	29.2851	16.949	26.3843	16.949
MPI-ESM_GLAC1D	150	-76.0702	-37.897	779.516	-36.2152	-45.348	-26.3945	-45.348	120.51	13.4519	6.87032	20.6397	39.1575	22.2884	36.273	22.2884
MPI-ESM_GLAC1D	153.75	-76.0702	-34.7588	777.684	-33.1566	-42.1267	-23.1927	-42.1267	162.069	17.9277	9.06083	21.636	52.4167	29.5041	50.1109	29.5041
MPI-ESM_GLAC1D	157.5	-76.0702	-31.4815	790.53	-29.7777	-38.962	-19.6471	-38.962	214.598	23.5456	11.9107	22.5289	69.2342	38.5486	67.8036	38.5486
MPI-ESM_GLAC1D	161.25	-76.0702	-28.2118	814.477	-20.2695	-35.9757	-15.972	-35.9757	280.514	31.6256	15.3634	24.0337	92.4734	49.4916	91.808	49.4916
MPI-ESM_GLAC1D	-146.25	-76.0702	-16.2587	829.675	-14.6398	-24.6652	-5.38277	-26.3188	495.633	53.1905	33.0676	17.2514	155.459	103.986	117.641	112.702
MPI-ESM_GLAC1D	-142.5	-76.0702	-16.669	780.51	-15.1952	-8.15095	-6.37105	-26.1241	571.966	60.7479	37.6729	17.1301	178.517	122.701	132.845	132.336
MPI-ESM_GLAC1D	-138.75	-76.0702	-17.1031	738.048	-15.8488	-6.80622	-7.24279	-25.988	625.833	66.3561	39.6082	17.4456	194.669	124.778	139.668	147.969
MPI-ESM_GLAC1D	-135	-76.0702	-17.562	703.668	-16.6073	-7.54841	-7.98433	-25.932	650.366	69.6531	40.3351	17.7954	201.021	124.365	139.095	157.28
MPI-ESM_GLAC1D	-131.25	-76.0702	-18.0298	677.114	-20.3185	-8.17601	-8.62561	-25.9431	648.657	69.097	39.6935	17.8568	198.281	121.214	134.671	161.149
MPI-ESM_GLAC1D	-127.5	-76.0702	-18.5101	659.261	-20.9956	-8.67992	-9.16662	-26.0486	626.671	65.8827	38.3657	17.6059	192.32	116.377	127.565	159.572
MPI-ESM_GLAC1D	-123.75	-76.0702	-18.9623	649.432	-21.6766	-9.06924	-9.59631	-26.2133	594.047	61.1712	36.9823	16.9424	181.82	111.723	119.223	154.854
MPI-ESM_GLAC1D	-120	-76.0702	-19.3649	647.874	-22.3107	-9.34658	-9.91532	-26.4548	559.857	57.2744	35.395	15.9322	169.532	108.47	112.424	148.334
MPI-ESM_GLAC1D	-116.25	-76.0702	-19.7002	652.304	-22.87	-9.53799	-10.1373	-26.7165	532.274	55.5151	34.9081	14.9524	159.292	107.135	109.028	141.847
MPI-ESM_GLAC1D	-112.5	-76.0702	-19.9473	660.406	-23.2938	-9.60895	-10.2376	-26.9757	513.159	54.2751	35.3328	13.8307	151.445	107.79	108.805	136.249
MPI-ESM_GLAC1D	-108.75	-76.0702	-20.1029	672.001	-23.5881	-9.58031	-10.2239	-27.2283	501.254	53.2115	34.6712	12.7333	145.946	109.481	111.184	131.934
MPI-ESM_GLAC1D	-105	-76.0702	-20.1494	684.665	-23.732	-9.44229	-10.1022	-27.4119	494.188	51.6424	34.0393	11.5177	141.447	111.792	114.219	129.295
MPI-ESM_GLAC1D	-101.25	-76.0702	-20.1185	698.63	-23.7541	-11.6347	-9.87365	-27.5622	485.546	49.6797	33.3341	10.5571	137.269	106.936	115.884	125.671
MPI-ESM_GLAC1D	-97.5	-76.0702	-20.0243	713.857	-23.7118	-11.3762	-9.55594	-27.669	472.867	47.3264	32.1357	9.94345	132.225	103.774	114.779	120.92
MPI-ESM_GLAC1D	-93.75	-76.0702	-19.9188	729.612	-23.6877	-8.55817	-9.21805	-27.7504	452.24	44.9603	30.9289	10.0459	125.785	102.184	108.762	115.221
MPI-ESM_GLAC1D	-90	-76.0702	-19.8192	747.545	-23.7222	-8.18708	-8.84956	-27.837	425.609	41.9857	28.5518	10.849	117.6	92.1391	100.176	108.877
MPI-ESM_GLAC1D	-86.25	-76.0702	-19.7596	766.391	-23.8459	-7.83291	-8.50972	-27.949	395.304	38.7239	25.481	12.141	108.976	81.0857	89.4242	102.58
MPI-ESM_GLAC1D	-82.5	-76.0702	-19.7419	786.226	-21.0331	-7.50218	-8.22066	-28.087	365.109	35.4284	23.0093	13.2227	100.556	71.5427	78.7839	96.4447
MPI-ESM_GLAC1D	-78.75	-76.0702	-19.7209	807.443	-21.1548	-7.16429	-7.92509	-28.2204	338.582	33.5957	20.8822	14.5206	94.3911	63.9487	69.6783	91.1947
MPI-ESM_GLAC1D	-75	-76.0702	-19.6203	828.672	-21.1874	-6.76195	-7.57678	-28.2641	318.741	32.0882	19.2602	16.1629	90.3126	58.0371	62.365	87.2893
MPI-ESM_GLAC1D	-71.25	-76.0702	-19.4173	846.485	-21.0806	-6.29906	-7.17834	-28.182	302.545	30.1828	17.7431	17.3436	86.5379	53.5396	56.6409	83.4148
MPI-ESM_GLAC1D	-18.75	-76.0702	-19.1644	634.524	-18.2655	-10.1656	-10.2233	-26.5342	330.359	40.2072	16.094	25.0379	110.492	57.1668	70.899	78.3863
MPI-ESM_GLAC1D	-15	-76.0702	-22.4118	657.931	-18.3812	-12.8179	-13.0136	-29.8813	306.621	38.1577	16.0993	25.613	104.889	57.0425	70.4253	68.4142
MPI-ESM_GLAC1D	-11.25	-76.0702	-26.0244	688.521	-22.2373	-18.1985	-16.0924	-33.6189	273.628	35.2321	15.3075	26.9913	96.9579	52.0686	68.2239	57.235
MPI-ESM_GLAC1D	-7.5	-76.0702	-29.7383	723.121	-26.2276	-21.2278	-19.2291	-37.4678	239.43	31.6087	14.0576	28.8425	87.0411	47.0039	63.3549	47.2494
MPI-ESM_GLAC1D	-3.75	-76.0702	-33.3216	758.932	-30.0765	-24.1399	-22.2584	-41.2035	204.519	27.1551	12.1042	29.9701	75.2794	40.947	56.1458	38.8038
MPI-ESM_GLAC1D	0	-79.777	-37.7272	801.578	-34.8708	-45.7491	-25.9954	-45.7491	136.435	18.0816	7.85632	30.0354	50.6563	23.6258	41.4818	23.6258
MPI-ESM_GLAC1D	3.75	-79.777	-39.9004	836.328	-37.0056	-48.2276	-27.6679	-48.2276	114.555	15.1884	6.56009	29.7034	42.4802	19.7465	35.0001	19.7465
MPI-ESM_GLAC1D	7.5	-79.777	-41.8418	872.779	-38.8428	-50.5206	-29.0826	-50.5206	93.8129	12.4765	5.4294	28.9577	34.7602	16.3009	28.2722	16.3009
MPI-ESM_GLAC1D	11.25	-79.777	-43.5412	908.908	-40.3832	-52.5961	-30.2474	-52.5961	75.528	9.98996	4.4096	27.9953	27.9176	13.2712	22.7375	13.2712
MPI-ESM_GLAC1D	15	-79.777	-45.0095	943.184	-41.6859	-54.4392	-31.2239	-54.4392	60.7718	7.94538	3.61691	26.3301	22.2257	10.8737	18.1432	10.8737
MPI-ESM_GLAC1D	18.75	-79.777	-46.2484	974.952	-42.751	-56.0316	-31.9895	-56.0316	49.8458	6.38881	2.96392	24.6595	18.0906	9.02224	14.8654	9.02224
MPI-ESM_GLAC1D	22.5	-79.777	-47.2989	1003.5	-43.6312	-57.4112	-32.595	-57.4112	42.4249	5.38045	2.50647	23.1849	15.2254	7.74758	12.7929	7.74758
MPI-ESM_GLAC1D	26.25	-79.777	-48.1908	1029.47	-44.3623	-58.6208	-33.0813	-58.6208	37.6219	4.64452	2.20126	21.7205	13.2957	6.90189	11.5722	6.90189
MPI-ESM_GLAC1D	30	-79.777	-48.9893	1052.58	-44.9939	-59.723	-33.526	-59.723	34.5981	4.19778	2.02451	20.3616	12.0145	6.40831	10.7677	6.40831
MPI-ESM_GLAC1D	33.75	-79.777	-49.725	1075.96	-45.5577	-60.7667	-33.9036	-60.7667	32.8386	3.95008	1.91889	19.6684	11.2885	6.11237	10.3769	6.11237
MPI-ESM_GLAC1D	37.5	-79.777	-50.4579	1096.84	-46.1495	-61.7842	-34.3274	-61.7842	31.691	3.83692	1.86809	19.0109	10.7895	5.9472	10.0795	5.9472
MPI-ESM_GLAC1D	41.25	-79.777	-51.1743	1118.51	-46.7705	-60.6997	-34.6933	-62.7751	30.6599	3.71558	1.82682	18.4443	10.3195	5.80267	9.8975	5.8162
MPI-ESM_GLAC1D	45	-79.777	-51.8817	1138.51	-47.4001	-61.6437	-35.1015	-63.7296	29.3355	3.53661	1.779	17.5384	9.78293	5.60325	9.35311	5.68871
MPI-ESM_GLAC1D	48.75	-79.777	-52.5515	1156.84	-48.0511	-62.4953	-35.4798	-64.602	27.8461	3.30064	1.7595	16.3614	9.1795	5.43144	8.70722	5.54146
MPI-ESM_GLAC1D	52.5	-79.777	-53.1454	1171.36	-48.6677	-56.3824	-35.8515	-65.3344	26.459	3.06524	1.6667	15.0264	8.61599	5.2101	7.94534	5.42476
MPI-ESM_GLAC1D	56.25	-79.777	-53.6039	1180.02	-49.1879	-56.8388	-36.1666	-65.8585	25.3547	2.84176	1.57659	14.0946	8.14439	4.99944	7.37481	5.34283
MPI-ESM_GLAC1D	60	-79.777	-53.8661	1182.62	-49.5466	-57.0706	-36.3763	-66.1163	24.9808	2.82264	1.52902	13.7115	7.95278	4.91563	7.092	5.31639
MPI-ESM_GLAC1D	63.75	-79.777	-53.9177	1179.63	-49.7067	-57.0856	-36.416	-66.0935	25.4547	2.88016	1.53796	14.3475	8.129	4.94248	7.39046	5.37082
MPI-ESM_GLAC1D	67.5	-79.777	-53.8062	1170.88	-49.6983	-56.9241	-36.4316	-65.8546	26.6817	3.08968	1.61755	15.3231	8.64096	5.12097	7.8183	5.52049
MPI-ESM_GLAC1D	71.25	-79.777	-53.6001	1162.48	-49.5909	-56.6865	-36.2962	-65.5049	28.6608	3.35975	1.74934	16.8199	9.4318	5.42166	8.78175	5.75597
MPI-ESM_GLAC1D	75	-79.777	-53.4175	1154.61	-49.4932	-56.4658	-36.2024	-65.1807	30.745	3.66203	1.87129	18.1134	10.3183	5.79673	9.57927	6.00253
MPI-ESM_GLAC1D	78.75	-79.777	-53.3228	1150.56	-49.4698	-62.9315	-36.1406	-64.9704	32.3356	3.95046	1.939	19.4179	11.0772	6.00374	10.1962	6.18554
MPI-ESM_GLAC1D	82.5	-79.777	-53.368	1150.4	-49.5485	-62.9022	-36.179	-64.9424	32.9027	4.10914	1.97238	20.2605	11.455	6.05508	10.3802	6.24171
MPI-ESM_GLAC1D	86.25	-79.777	-53.5692	1153.93	-49.7627	-63.0493	-36.3522	-65.1104	32.139	4.04781	1.94847	20.0053	11.2428	5.96191	9.93662	6.13983
MPI-ESM_GLAC1D	90	-79.777	-53.8825	1159.05	-50.0635	-63.3215	-36.6399	-65.421	30.2434	3.86307	1.88642	19.2311	10.6067	5.74103	8.91648	5.90379
MPI-ESM_GLAC1D	93.75	-79.777	-54.1905	1163.48	-50.3467	-63.5917	-36.9492	-65.7244	27.8136	3.56516	1.78209	18.1024	9.71639	5.4248	7.7919	5.57756
MPI-ESM_GLAC1D	97.5	-79.777	-54.3483	1161.91	-50.5251	-63.662	-37.1796	-65.8057	25.2116	3.18986	1.66893	16.7646	8.72918	5.06776	6.7437	5.21817
MPI-ESM_GLAC1D	101.25	-79.777	-54.225	1148.81	-50.4886	-39.5663	-37.2975	-65.4939	22.7912	2.83301	1.51825	15.1677	7.73975	4.82536	5.74525	4.90873
MPI-ESM_GLAC1D	105	-79.777	-53.7455	1126.72	-50.1293	-35.594	-37.1757	-64.7569	21.1077	2.57143	1.42241	13.5555	6.96248	4.41771	5.00627	4.70064
MPI-ESM_GLAC1D	108.75	-79.777	-53.0072	1098.55	-49.5062	-35.2978	-36.8645	-63.7302	20.3637	2.40683	1.44919	11.9329	6.51137	4.38603	4.78434	4.61004
MPI-ESM_GLAC1D	112.5	-79.777	-52.1013	1068.79	-48.6989	-34.8635	-36.4173	-62.5557	20.3802	2.34199	1.47649	10.6751	6.33424	4.48025	4.76827	4.66952
MPI-ESM_GLAC1D	116.25	-79.777	-51.1242	1038.72	-53.8182	-59.3365	-35.9244	-61.3357	21.1121	2.34727	1.53631	9.50491	6.39006	4.76175	5.03298	4.87878
MPI-ESM_GLAC1D	120	-79.777	-50.0855	1008.88	-52.6262	-58.0943	-35.3619	-60.0655	22.5823	2.44621	1.64691	8.69532	6.70143	5.1352	5.48202	5.25793
MPI-ESM_GLAC1D	123.75	-79.777	-48.9626	978.145	-45.7354	-56.759	-34.7369	-58.6951	25.2803	2.69462	1.83237	8.30718	7.40888	5.74194	6.37108	5.88161
MPI-ESM_GLAC1D	127.5	-79.777	-47.7118	946.137	-44.5961	-55.2792	-34.0052	-57.1749	29.6948	3.1394	2.12178	8.41984	8.63662	6.70501	7.72944	6.8506
MPI-ESM_GLAC1D	131.25	-79.777	-46.2844	913.277	-43.3116	-53.6086	-33.1106	-55.4568	36.4743	3.85416	2.57761	9.09977	10.7659	8.14027	9.56501	8.32038
MPI-ESM_GLAC1D	135	-79.777	-44.6512	881.079	-41.8819	-51.716	-31.9817	-53.5219	46.6627	4.94125	3.20744	10.5368	13.92	10.2151	12.748	10.394
MPI-ESM_GLAC1D	138.75	-79.777	-42.7987	851.689	-40.2588	-49.6053	-30.5768	-51.3754	60.4164	6.50963	4.08454	11.982	18.2844	13.03	16.5406	13.2306
MPI-ESM_GLAC1D	142.5	-79.777	-40.7279	828.63	-38.432	-47.3052	-28.8359	-49.0466	78.6255	8.5069	5.2204	13.2681	24.1198	16.7372	21.5422	16.9565
MPI-ESM_GLAC1D	146.25	-79.777	-38.4603	813.783	-36.3949	-44.8592	-26.7558	-46.5805	100.916	11.0977	6.6631	14.4858	31.3538	21.2488	27.6195	21.523
MPI-ESM_GLAC1D	150	-79.777	-36.0293	808.342	-34.1468	-42.3228	-24.3515	-44.031	128.056	14.4008	8.4178	16.1063	40.5258	26.5808	35.263	27.0214
MPI-ESM_GLAC1D	153.75	-79.777	-33.4728	812.455	-31.71	-39.7401	-21.6699	-41.4483	159.664	18.2335	10.4635	17.6363	51.3588	32.5795	44.3648	33.2965
MPI-ESM_GLAC1D	157.5	-79.777	-30.8488	825.801	-29.1247	-37.1822	-18.7701	-38.8982	196.877	22.8682	12.7225	19.4157	64.3536	39.2986	56.0482	40.2595
MPI-ESM_GLAC1D	161.25	-79.777	-28.2355	845.63	-26.458	-34.7128	-15.7923	-36.4438	240.079	27.8348	15.0378	21.1872	79.1893	46.5187	71.0896	47.6012
MPI-ESM_GLAC1D	165	-79.777	-25.4211	930.55	-17.0423	-32.3501	-11.8007	-34.2862	291.966	32.8405	17.4735	23.3408	94.7593	54.2719	92.2888	55.1712
MPI-ESM_GLAC1D	168.75	-79.777	-23.0715	964.679	-14.2617	-30.2896	-8.88667	-32.2738	329.961	36.7568	19.3582	24.6719	107.731	60.1713	106.46	61.1944
MPI-ESM_GLAC1D	172.5	-79.777	-21.0098	1002.11	-11.7382	-28.5513	-6.24996	-30.6046	344.665	38.4814	20.44	24.3005	111.492	63.326	108.839	64.4399
MPI-ESM_GLAC1D	176.25	-79.777	-19.2082	1044.43	-16.7165	-27.1763	-3.67704	-29.2934	325.998	37.2424	19.8227	22.4256	106.768	62.1126	95.6785	63.4737
MPI-ESM_GLAC1D	180	-79.777	-17.7504	1102.31	-14.6176	-26.2811	-1.10217	-28.4939	286.792	32.9682	17.6488	20.8789	93.9333	56.6408	79.9751	57.9938
MPI-ESM_GLAC1D	-176.25	-79.777	-16.8685	1149.32	-13.1976	-25.9016	0.394576	-28.2608	238.256	28.2003	14.9562	20.4283	78.5365	49.8125	57.0198	51.3743
MPI-ESM_GLAC1D	-161.25	-79.777	-16.1141	1160.38	-17.6555	-25.9074	0.790409	-28.4294	156.389	19.4721	8.71808	24.0645	54.4248	32.6624	30.6678	33.3676
MPI-ESM_GLAC1D	-153.75	-79.777	-16.8207	1047.98	-17.9901	-25.828	-1.5286	-28.0219	201.715	23.4719	12.9428	21.5685	66.4407	39.0121	52.3514	39.5547
MPI-ESM_GLAC1D	-150	-79.777	-17.807	875.867	-18.3449	-25.7036	-5.13993	-27.3207	218.677	26.7954	14.5837	23.8317	76.1027	44.08	50.064	45.5814
MPI-ESM_GLAC1D	-146.25	-79.777	-18.5967	829.503	-19.0311	-26.1444	-6.67704	-27.6638	260.725	30.5698	17.0211	22.1699	88.2905	51.2161	63.2163	53.3594
MPI-ESM_GLAC1D	-142.5	-79.777	-19.5067	789.285	-19.9276	-26.7193	-8.18225	-28.1397	306.267	34.7949	19.3477	21.158	101.431	59.5506	77.0195	62.3341
MPI-ESM_GLAC1D	-138.75	-79.777	-20.496	754.899	-20.9894	-27.3846	-9.63863	-28.7165	345.205	38.2904	21.6064	19.9202	111.652	67.3483	88.779	70.7546
MPI-ESM_GLAC1D	-135	-79.777	-21.5353	727.428	-22.1516	-28.1372	-11.0325	-29.3917	369.613	40.1765	23.2433	18.8025	117.308	72.9578	95.9761	76.7186
MPI-ESM_GLAC1D	-131.25	-79.777	-22.5814	707.09	-23.367	-28.9269	-12.3326	-30.1241	378.04	40.1677	24.2313	17.4383	117.68	76.1621	98.127	80.0773
MPI-ESM_GLAC1D	-127.5	-79.777	-23.6001	694.701	-24.5819	-29.7447	-13.4987	-30.9151	371.572	38.6364	24.7592	15.7162	113.403	76.7847	95.3263	80.6738
MPI-ESM_GLAC1D	-123.75	-79.777	-24.5676	688.991	-25.7401	-30.5676	-14.528	-31.7374	355.626	36.3734	24.0065	13.9207	106.261	75.1911	90.6637	79.074
MPI-ESM_GLAC1D	-120	-79.777	-25.4569	690.67	-26.8085	-31.3775	-15.3724	-32.5642	335.728	33.5332	23.2793	12.006	98.0856	73.2286	85.1238	76.7343
MPI-ESM_GLAC1D	-116.25	-79.777	-26.2337	697.916	-27.7531	-17.33	-16.0345	-33.3604	317.221	30.9243	22.5904	10.501	90.8958	73.277	80.2656	74.3529
MPI-ESM_GLAC1D	-112.5	-79.777	-26.875	707.658	-28.5728	-17.7942	-16.5175	-34.0258	301.962	28.7986	21.8907	9.39035	84.9467	68.7454	75.6975	72.5034
MPI-ESM_GLAC1D	-108.75	-79.777	-27.3583	717.515	-29.2433	-18.1041	-16.8339	-34.5323	292.26	27.3782	20.5049	8.93011	81.0728	65.5581	73.0243	71.3045
MPI-ESM_GLAC1D	-105	-79.777	-27.6699	727.931	-29.7271	-18.2336	-16.9869	-34.8682	289.929	26.6614	20.1668	8.4906	79.5886	64.595	72.1	71.7332
MPI-ESM_GLAC1D	-101.25	-79.777	-27.78	739.14	-29.968	-18.1685	-16.9303	-35.0401	293.084	27.0092	20.3469	8.51425	80.1264	64.9134	73.2172	72.6494
MPI-ESM_GLAC1D	-97.5	-79.777	-27.6892	752.831	-29.9764	-15.3863	-16.6282	-35.0518	301.445	28.462	21.0498	8.96463	82.9248	69.2257	75.0507	74.5554
MPI-ESM_GLAC1D	-93.75	-79.777	-27.4382	770.004	-29.8065	-14.8629	-16.0976	-34.9535	311.959	30.1564	21.1446	9.55067	86.1882	70.263	77.2126	77.1315
MPI-ESM_GLAC1D	-90	-79.777	-27.0453	790.509	-29.4888	-14.1675	-15.3789	-34.7647	321.192	31.6384	21.2886	10.2167	89.3224	70.3712	77.9373	79.5005
MPI-ESM_GLAC1D	-86.25	-79.777	-26.5287	812.208	-29.0318	-13.3316	-14.5104	-34.4529	327.066	32.823	21.1028	11.2179	91.4328	68.9905	77.181	81.5469
MPI-ESM_GLAC1D	-82.5	-79.777	-25.9051	834.227	-28.453	-12.4006	-13.5481	-34.0434	328.918	33.4725	21.0161	12.3125	92.4588	66.4263	74.22	83.2595
MPI-ESM_GLAC1D	-78.75	-79.777	-25.1737	855.863	-27.7388	-11.3883	-12.5032	-33.5408	332.807	34.2639	20.9852	13.7766	94.3	64.1021	71.4193	85.4869
MPI-ESM_GLAC1D	-56.25	-79.777	-19.6167	994.771	-27.188	-3.98591	-4.71285	-29.4613	211.312	20.9018	12.0573	16.1106	61.1661	47.9568	43.8538	59.134
MPI-ESM_GLAC1D	-52.5	-79.777	-18.9655	991.565	-26.6646	-3.54059	-4.06376	-28.8806	187.375	19.8429	9.81975	20.0708	55.5931	38.3216	36.1149	54.0723
MPI-ESM_GLAC1D	-48.75	-79.777	-19.6603	820.403	-21.091	-6.51651	-7.5299	-28.0798	170.535	20.453	6.83977	31.3675	53.9085	21.1184	24.2377	52.1197
MPI-ESM_GLAC1D	-45	-79.777	-19.2528	809.251	-20.5227	-6.25869	-7.26558	-27.6189	184.279	22.6606	9.00123	26.792	58.6084	27.273	29.9665	52.86
MPI-ESM_GLAC1D	-41.25	-79.777	-18.2801	929.992	-19.9875	-3.97679	-4.40881	-27.8539	217.085	25.3474	13.1081	15.5554	65.2041	50.9848	50.506	54.1719
MPI-ESM_GLAC1D	-37.5	-79.777	-18.8002	875.952	-20.4588	-5.02237	-5.88212	-27.8643	227.182	27.8913	13.6695	18.9157	72.1102	47.0312	50.457	55.0903
MPI-ESM_GLAC1D	-33.75	-79.777	-19.5438	711.553	-19.759	-8.70661	-9.23108	-27.3741	227.568	29.6167	11.7407	25.1057	77.1008	39.776	47.8558	54.7002
MPI-ESM_GLAC1D	-30	-79.777	-20.2818	697.657	-20.3241	-9.77627	-10.1998	-28.0173	240.115	30.6626	13.271	24.503	81.3066	45.4532	55.0303	54.0142
MPI-ESM_GLAC1D	-26.25	-79.777	-21.5127	690.54	-17.738	-11.1415	-11.5214	-29.1677	243.835	30.489	14.4358	24.6085	83.6896	49.2975	59.4487	51.7984
MPI-ESM_GLAC1D	-22.5	-79.777	-23.2245	687.846	-19.5518	-15.2851	-13.2363	-30.7895	238.071	28.8815	15.1951	24.7492	82.8683	48.4266	61.2599	48.4209
MPI-ESM_GLAC1D	-18.75	-79.777	-25.3449	690.764	-21.8636	-32.8324	-15.2649	-32.8324	222.932	27.3156	14.3659	24.6743	77.9751	43.8854	60.5463	43.8854
MPI-ESM_GLAC1D	-15	-79.777	-27.7132	701.861	-24.404	-35.197	-17.4433	-35.197	210.385	26.4137	13.0185	26.3193	75.0557	39.7206	59.7544	39.7206
MPI-ESM_GLAC1D	-11.25	-79.777	-30.2534	718.58	-27.1149	-37.7764	-19.7174	-37.7764	195.346	25.0734	11.781	27.8598	70.8156	35.7266	57.0655	35.7266
MPI-ESM_GLAC1D	-7.5	-79.777	-32.8337	741.561	-29.8402	-40.4561	-21.9668	-40.4561	178.009	23.2442	10.4791	29.1552	65.416	31.7288	53.0255	31.7288
MPI-ESM_GLAC1D	-3.75	-79.777	-35.3514	769.758	-32.4567	-43.1404	-24.0781	-43.1404	158.291	20.8386	9.13932	29.8287	58.5636	27.6823	47.8405	27.6823
MPI-ESM_GLAC1D	0	-83.4789	-37.6815	864.906	-34.7113	-39.8909	-24.9869	-46.5167	80.215	9.59146	4.92445	22.5459	27.7251	15.575	22.1224	15.9015
MPI-ESM_GLAC1D	3.75	-83.4789	-38.7788	885.244	-35.7354	-41.0348	-25.8118	-47.8402	70.9049	8.44365	4.41638	21.952	24.5163	13.8387	19.6	13.9892
MPI-ESM_GLAC1D	7.5	-83.4789	-39.8378	908.08	-36.6892	-42.1728	-26.5351	-49.154	63.088	7.45489	3.932	21.1307	21.626	12.3466	17.6213	12.4712
MPI-ESM_GLAC1D	11.25	-83.4789	-40.8545	932.365	-37.5778	-43.2711	-27.2089	-50.4509	57.19	6.80941	3.59442	21.3572	19.7475	11.1439	16.2791	11.1682
MPI-ESM_GLAC1D	15	-83.4789	-41.833	956.991	-38.4314	-44.3401	-27.8261	-51.7139	52.1604	6.22496	3.27622	21.0867	17.9579	10.139	15.0673	10.1487
MPI-ESM_GLAC1D	18.75	-83.4789	-42.7657	981.472	-39.2282	-52.9366	-28.4049	-52.9366	48.345	5.74198	3.04528	20.6232	16.5854	9.3241	13.9871	9.3241
MPI-ESM_GLAC1D	22.5	-83.4789	-43.6732	1005.52	-40.0069	-54.1195	-28.955	-54.1195	45.3682	5.41794	2.84666	20.2917	15.5828	8.7036	13.1404	8.7036
MPI-ESM_GLAC1D	26.25	-83.4789	-44.541	1028.58	-40.7621	-55.253	-29.4863	-55.253	42.9825	5.13633	2.70212	20.0589	14.7717	8.29092	12.6261	8.29092
MPI-ESM_GLAC1D	30	-83.4789	-45.3757	1050.29	-41.4893	-56.3357	-30.0123	-56.3357	41.3848	4.97358	2.60786	19.8844	14.2146	7.98457	12.2267	7.98457
MPI-ESM_GLAC1D	33.75	-83.4789	-46.1844	1070.59	-42.2133	-57.3637	-30.4947	-57.3637	40.5624	4.83496	2.55064	19.7039	13.8586	7.82094	12.2943	7.82094
MPI-ESM_GLAC1D	37.5	-83.4789	-46.9732	1088.04	-42.9567	-56.4087	-31.0026	-58.3344	39.9334	4.72433	2.5182	19.3573	13.5571	7.72624	12.2223	7.73298
MPI-ESM_GLAC1D	41.25	-83.4789	-47.725	1103.61	-43.6664	-57.2993	-31.5019	-59.2367	39.7343	4.70996	2.52194	19.1399	13.4631	7.69723	12.1237	7.72352
MPI-ESM_GLAC1D	45	-83.4789	-48.4536	1116.05	-44.3858	-58.1275	-32.0032	-60.0733	39.5088	4.67002	2.52719	18.7017	13.3488	7.72126	11.9242	7.77206
MPI-ESM_GLAC1D	48.75	-83.4789	-49.1359	1125.38	-45.0798	-58.8749	-32.5227	-60.8207	39.5897	4.64848	2.54518	18.4217	13.35	7.76181	11.8856	7.83524
MPI-ESM_GLAC1D	52.5	-83.4789	-49.7614	1132.02	-45.7484	-59.5292	-33.0156	-61.473	39.8195	4.67179	2.58293	18.1516	13.3881	7.83053	11.8704	7.91769
MPI-ESM_GLAC1D	56.25	-83.4789	-50.3238	1135.69	-46.3682	-60.0897	-33.4934	-62.0245	39.9598	4.6868	2.6108	17.8537	13.4072	7.8908	11.7676	8.00746
MPI-ESM_GLAC1D	60	-83.4789	-50.8125	1136.89	-46.9353	-60.5422	-33.9355	-62.4665	40.3387	4.71558	2.62593	17.6819	13.5076	7.96835	11.8328	8.09033
MPI-ESM_GLAC1D	63.75	-83.4789	-51.2328	1135.87	-47.4528	-60.9048	-34.3424	-62.8077	40.6204	4.70751	2.63841	17.4899	13.567	8.02546	11.885	8.14823
MPI-ESM_GLAC1D	67.5	-83.4789	-51.5796	1132.52	-47.9151	-61.16	-34.7226	-63.0486	40.8718	4.72886	2.6423	17.3414	13.59	8.04402	11.9536	8.17474
MPI-ESM_GLAC1D	71.25	-83.4789	-51.8553	1127.28	-48.3044	-61.3254	-35.0481	-63.1944	41.0712	4.73678	2.63098	17.2499	13.5845	8.05307	12.1261	8.17784
MPI-ESM_GLAC1D	75	-83.4789	-52.0596	1120.89	-48.6293	-61.4022	-35.3274	-63.251	41.0411	4.74112	2.60948	17.2791	13.6015	8.0175	12.0648	8.15592
MPI-ESM_GLAC1D	78.75	-83.4789	-52.1916	1113.65	-48.8819	-61.397	-35.5559	-63.2263	40.8735	4.71705	2.5729	17.2816	13.5429	7.91928	12.004	8.08754
MPI-ESM_GLAC1D	82.5	-83.4789	-52.2517	1104.44	-49.0609	-61.298	-35.7487	-63.1091	40.4732	4.66662	2.52967	17.3086	13.4133	7.79873	11.9274	7.99649
MPI-ESM_GLAC1D	86.25	-83.4789	-52.2233	1093.36	-49.1501	-61.0943	-35.8912	-62.8884	39.8956	4.63354	2.4901	17.3526	13.271	7.67328	11.6561	7.88548
MPI-ESM_GLAC1D	90	-83.4789	-52.1	1079.28	-49.154	-60.7655	-35.9869	-62.5421	39.1765	4.60058	2.44714	17.4024	13.0817	7.53614	11.3405	7.75931
MPI-ESM_GLAC1D	93.75	-83.4789	-51.8522	1062.31	-49.0375	-60.2837	-36.0019	-62.0414	38.4066	4.55746	2.41229	17.4012	12.8694	7.42294	10.9876	7.6442
MPI-ESM_GLAC1D	97.5	-83.4789	-51.4605	1042.06	-48.7901	-59.6301	-35.9225	-61.3643	37.8731	4.52246	2.3946	17.3686	12.7259	7.35188	10.7019	7.56989
MPI-ESM_GLAC1D	101.25	-83.4789	-50.9408	1017.21	-48.4255	-58.8091	-35.7916	-60.5225	37.5252	4.466	2.39735	17.0481	12.5782	7.34509	10.4784	7.55088
MPI-ESM_GLAC1D	105	-83.4789	-50.2795	991.011	-47.906	-57.8397	-35.5332	-59.5349	37.6676	4.47441	2.43126	16.8172	12.587	7.42524	10.4526	7.61911
MPI-ESM_GLAC1D	108.75	-83.4789	-49.4977	963.982	-47.2517	-56.7538	-35.1829	-58.4333	38.4487	4.57187	2.49738	16.6856	12.8162	7.62587	10.598	7.79122
MPI-ESM_GLAC1D	112.5	-83.4789	-48.6193	937.423	-46.4886	-55.5865	-34.7356	-57.2576	39.8829	4.74142	2.61507	16.4801	13.2222	7.97941	10.9604	8.10029
MPI-ESM_GLAC1D	116.25	-83.4789	-47.6517	912.582	-45.6156	-54.3605	-34.1822	-56.0258	42.1829	4.99017	2.7799	16.4463	13.9331	8.47129	11.6043	8.54333
MPI-ESM_GLAC1D	120	-83.4789	-46.6087	889.479	-44.6553	-53.0904	-33.5319	-54.7517	45.3562	5.38377	3.0047	16.6484	14.9411	9.14566	12.6159	9.1804
MPI-ESM_GLAC1D	123.75	-83.4789	-45.4867	868.594	-43.6039	-53.4327	-32.7649	-53.4327	49.4639	5.90175	3.27077	17.0234	16.2813	9.94974	13.8079	9.94974
MPI-ESM_GLAC1D	127.5	-83.4789	-44.285	850.371	-42.4652	-52.0714	-31.8756	-52.0714	54.552	6.53958	3.6217	17.298	17.9512	10.9839	15.0179	10.9839
MPI-ESM_GLAC1D	131.25	-83.4789	-43.0017	834.969	-41.238	-50.6638	-30.8665	-50.6638	60.7465	7.39077	4.04814	17.971	20.1083	12.2614	16.4974	12.2614
MPI-ESM_GLAC1D	135	-83.4789	-41.6436	822.494	-39.9287	-49.2165	-29.7285	-49.2165	67.8524	8.29832	4.5231	18.298	22.4939	13.7926	18.2393	13.7926
MPI-ESM_GLAC1D	138.75	-83.4789	-40.2116	813.501	-38.5349	-47.7348	-28.4576	-47.7348	76.6647	9.44364	5.07281	18.8546	25.5087	15.6185	20.4121	15.6185
MPI-ESM_GLAC1D	142.5	-83.4789	-38.7131	808.427	-37.0655	-46.227	-27.0507	-46.227	87.7853	10.9122	5.76498	19.4683	29.2955	17.8819	23.2302	17.8819
MPI-ESM_GLAC1D	146.25	-83.4789	-37.1548	807.701	-35.5225	-44.6996	-25.5065	-44.6996	101.84	12.6391	6.63153	19.8736	33.9561	20.6573	27.2559	20.6573
MPI-ESM_GLAC1D	150	-83.4789	-35.5576	810.415	-33.9203	-43.1723	-23.8691	-43.1723	119.59	14.8016	7.64367	20.7456	40.0721	23.9244	32.5533	23.9244
MPI-ESM_GLAC1D	153.75	-83.4789	-33.9432	816.675	-32.2764	-41.6664	-22.1477	-41.6664	140.307	17.4688	8.74264	21.5121	47.0666	27.5443	38.8305	27.5443
MPI-ESM_GLAC1D	157.5	-83.4789	-32.3459	825.516	-30.6286	-40.2061	-20.4043	-40.2061	161.713	20.3012	9.86133	22.4311	54.5139	31.2432	44.904	31.2432
MPI-ESM_GLAC1D	161.25	-83.4789	-30.7928	836.125	-28.9984	-38.8168	-18.6699	-38.8168	181.813	22.8245	11.1142	22.7412	61.3493	34.9836	50.4014	34.9836
MPI-ESM_GLAC1D	165	-83.4789	-29.3151	847.972	-27.4235	-37.5186	-16.9915	-37.5186	199.085	24.9845	12.1481	22.9583	67.2494	38.2642	54.8098	38.2642
MPI-ESM_GLAC1D	168.75	-83.4789	-27.9265	862.21	-25.9261	-36.335	-15.3763	-36.335	217.837	26.8939	13.0001	23.0898	72.8283	41.1091	61.0165	41.1091
MPI-ESM_GLAC1D	172.5	-83.4789	-26.4042	938.869	-24.5876	-35.4652	-12.8118	-35.4652	230.629	27.7722	13.3464	23.3732	75.6696	42.8454	66.8094	42.8454
MPI-ESM_GLAC1D	176.25	-83.4789	-25.3085	953.772	-23.361	-34.5896	-11.4687	-34.5896	236.84	28.3968	13.4365	23.702	77.4166	43.7808	69.19	43.7808
MPI-ESM_GLAC1D	180	-83.4789	-24.3915	967.061	-22.3096	-33.8793	-10.3339	-33.8793	239.859	28.7055	13.2677	23.8421	78.2035	44.3243	69.8139	44.3243
MPI-ESM_GLAC1D	-176.25	-83.4789	-23.6699	977.816	-21.4528	-32.8052	-9.44397	-33.3415	242.767	28.9862	13.2656	23.8437	79.4025	44.8138	69.6549	44.9975
MPI-ESM_GLAC1D	-172.5	-83.4789	-23.1494	984.464	-20.8005	-32.3912	-8.82548	-32.9691	245.596	29.3755	13.4095	23.5634	80.7062	45.3327	68.6643	46.118
MPI-ESM_GLAC1D	-168.75	-83.4789	-22.8249	986.148	-20.3448	-32.1321	-8.48433	-32.7543	249.05	30.0669	13.8354	23.4191	82.7281	46.4	67.4973	47.431
MPI-ESM_GLAC1D	-165	-83.4789	-22.6957	982.916	-20.0922	-32.022	-8.41597	-32.6801	252.121	30.6188	14.4002	23.3237	84.0802	47.2889	67.141	48.4681
MPI-ESM_GLAC1D	-161.25	-83.4789	-22.7622	975.622	-20.0472	-32.0702	-8.60803	-32.7634	252.563	30.8053	14.9505	23.18	84.4457	47.9528	65.8844	48.8908
MPI-ESM_GLAC1D	-157.5	-83.4789	-23	963.378	-20.1911	-32.2421	-9.04358	-32.9659	247.187	30.4067	15.4138	23.2755	83.1581	48.187	62.56	49.1841
MPI-ESM_GLAC1D	-153.75	-83.4789	-23.6019	869.132	-20.4261	-32.0461	-11.0084	-32.8715	238.568	29.6686	15.535	24.1361	81.2056	47.4752	58.3151	48.7184
MPI-ESM_GLAC1D	-150	-83.4789	-24.1109	855.992	-25.3215	-32.4465	-11.7337	-33.294	230.679	28.5168	14.7174	23.9864	78.7585	46.3674	55.7684	47.7598
MPI-ESM_GLAC1D	-146.25	-83.4789	-24.7365	843.758	-25.8937	-32.9537	-12.554	-33.8201	223.777	27.1963	14.3308	23.1062	75.524	45.1855	54.5811	46.5519
MPI-ESM_GLAC1D	-142.5	-83.4789	-25.4632	832.466	-26.593	-33.5656	-13.4531	-34.4411	215.802	25.6902	13.9942	21.9498	71.622	43.7381	53.5434	45.1741
MPI-ESM_GLAC1D	-138.75	-83.4789	-26.2699	822.861	-23.1905	-34.2668	-14.3964	-35.1423	208.19	24.4646	13.5306	20.9416	68.3218	42.6724	52.7972	43.6723
MPI-ESM_GLAC1D	-135	-83.4789	-27.1382	815.03	-24.1234	-35.0383	-15.3639	-35.9073	200.33	23.1394	13.0817	20.0045	65.061	41.2775	52.0938	42.1272
MPI-ESM_GLAC1D	-131.25	-83.4789	-28.0358	809.576	-25.0967	-35.2557	-16.3431	-36.7191	194.543	22.0288	12.7068	18.8436	62.4617	40.4619	51.3696	41.0419
MPI-ESM_GLAC1D	-127.5	-83.4789	-28.9406	806.626	-26.0791	-36.0897	-17.2929	-37.5596	189.789	21.1057	12.5059	17.7889	60.109	39.5469	50.7572	40.2014
MPI-ESM_GLAC1D	-123.75	-83.4789	-29.8363	807.013	-27.0446	-36.9302	-18.177	-38.4112	185.494	20.25	12.4756	16.42	57.6855	39.2187	49.6953	40.0539
MPI-ESM_GLAC1D	-120	-83.4789	-30.6962	810.963	-27.9698	-37.7486	-18.9785	-39.2569	182.73	19.4802	12.586	15.0449	55.8119	39.2829	48.34	40.2536
MPI-ESM_GLAC1D	-116.25	-83.4789	-31.5038	818.616	-28.8265	-21.009	-19.666	-40.0837	180.596	18.8722	12.5515	13.6678	54.1967	41.4629	47.2361	40.7393
MPI-ESM_GLAC1D	-112.5	-83.4789	-32.2482	829.302	-34.0435	-21.5793	-20.2421	-40.8676	178.795	18.1849	12.3105	12.4633	52.6271	40.2258	45.9622	41.4011
MPI-ESM_GLAC1D	-108.75	-83.4789	-32.8905	840.385	-34.8208	-22.0481	-20.7083	-41.5622	177.813	17.5757	12.2534	11.4718	51.6714	39.1255	44.6688	42.6056
MPI-ESM_GLAC1D	-105	-83.4789	-33.4107	850.348	-35.4758	-22.4022	-21.0585	-42.1339	177.269	17.0738	12.0257	11.2018	51.0235	38.0147	43.5923	43.6013
MPI-ESM_GLAC1D	-101.25	-83.4789	-33.7889	857.914	-35.9862	-19.9091	-21.2936	-42.5232	177.818	17.0971	11.8247	11.3036	50.8832	39.0527	42.7253	44.5202
MPI-ESM_GLAC1D	-97.5	-83.4789	-33.9911	863.143	-36.2739	-19.9735	-21.3873	-42.7224	180.193	17.404	11.8587	11.7002	51.6286	38.6137	42.3048	45.3528
MPI-ESM_GLAC1D	-93.75	-83.4789	-34.0345	864.953	-36.3918	-19.9553	-21.3919	-42.7348	184.479	17.9039	11.9345	11.6038	52.6384	39.2467	42.9742	46.8522
MPI-ESM_GLAC1D	-90	-83.4789	-33.9183	865.688	-36.3189	-19.8218	-21.2441	-42.5805	190.356	18.575	12.0964	11.6082	54.0838	40.2397	44.2552	48.4423
MPI-ESM_GLAC1D	-86.25	-83.4789	-33.6763	865.71	-36.104	-19.5829	-20.9869	-42.3077	197.503	19.7037	12.3109	12.4407	56.5207	41.0338	45.4633	50.3294
MPI-ESM_GLAC1D	-82.5	-83.4789	-33.3338	868.375	-35.7785	-19.1929	-20.5651	-41.9704	205.077	20.8912	12.6921	13.2592	59.1297	42.1086	46.6667	52.2189
MPI-ESM_GLAC1D	-78.75	-83.4789	-32.9157	871.624	-35.3697	-18.7398	-20.0768	-41.5694	212.404	21.9586	12.9426	14.1016	61.8448	42.838	47.4966	54.0538
MPI-ESM_GLAC1D	-75	-83.4789	-32.4533	874.61	-34.9016	-18.2463	-19.5533	-41.1293	218.29	22.8627	13.0311	15.1207	64.3053	43.1092	47.8865	55.5203
MPI-ESM_GLAC1D	-71.25	-83.4789	-31.9595	876.588	-34.3989	-17.734	-19.0149	-40.6462	222.673	23.4227	13.016	16.1968	66.3147	42.9724	47.6093	56.8383
MPI-ESM_GLAC1D	-67.5	-83.4789	-31.4588	878.33	-33.8911	-17.2008	-18.4752	-40.154	227.839	24.1859	12.9473	17.3279	68.5598	43.2899	47.9765	58.4483
MPI-ESM_GLAC1D	-63.75	-83.4789	-30.9252	884.196	-33.367	-16.5315	-17.86	-39.6475	234.214	25.1974	14.0905	16.3887	70.5838	46.8793	51.0027	58.8301
MPI-ESM_GLAC1D	-60	-83.4789	-30.223	968.217	-33.3788	-14.3791	-15.9941	-39.5922	231.955	25.2383	14.7944	15.5068	69.8464	49.8455	52.3428	58.1063
MPI-ESM_GLAC1D	-56.25	-83.4789	-30.1494	863.546	-32.3937	-16.2034	-17.3717	-38.7328	228.563	26.2519	12.0874	19.8049	71.457	42.2429	48.3904	58.2847
MPI-ESM_GLAC1D	-52.5	-83.4789	-29.8239	856.004	-31.9836	-16.0146	-17.1523	-38.3559	228.115	27.0176	12.1352	20.2346	72.1211	42.4327	48.9825	57.6742
MPI-ESM_GLAC1D	-48.75	-83.4789	-29.5663	848.777	-31.6437	-15.8791	-16.9889	-38.0531	227.94	27.5687	12.3148	20.4479	72.8553	43.261	50.0947	56.5627
MPI-ESM_GLAC1D	-45	-83.4789	-29.4113	841.149	-31.4048	-15.8414	-16.9375	-37.848	228.238	27.8421	12.774	20.1774	73.2814	45.3071	52.5277	54.7728
MPI-ESM_GLAC1D	-41.25	-83.4789	-29.375	833.705	-26.5596	-15.9286	-17.0039	-37.7712	227.057	27.5329	13.3766	19.7955	72.9197	47.6451	55.0963	52.2863
MPI-ESM_GLAC1D	-37.5	-83.4789	-29.4823	824.802	-26.6547	-18.9986	-17.2467	-37.8233	220.386	26.77	13.2974	20.4939	72.0954	44.9217	54.6571	49.0793
MPI-ESM_GLAC1D	-33.75	-83.4789	-29.7567	816.322	-26.9092	-19.4081	-17.6543	-38.0414	210.489	25.5985	12.7863	21.613	70.3222	42.8865	53.0318	45.538
MPI-ESM_GLAC1D	-30	-83.4789	-30.1765	810.626	-27.3259	-19.9107	-18.1712	-38.4216	200.616	24.2333	12.5759	22.1256	67.8947	41.7678	52.1983	42.1407
MPI-ESM_GLAC1D	-26.25	-83.4789	-30.7515	806.895	-27.9027	-20.5409	-18.804	-38.9698	188.115	22.4481	12.2467	22.5288	64.1748	39.953	50.2577	38.4897
MPI-ESM_GLAC1D	-22.5	-83.4789	-31.4741	805.78	-28.628	-39.6911	-19.5566	-39.6911	173.408	20.5221	11.4218	23.0792	59.6222	34.7002	47.108	34.7002
MPI-ESM_GLAC1D	-18.75	-83.4789	-32.322	807.033	-29.4815	-40.5551	-20.3925	-40.5551	157.423	18.6058	10.2785	23.8003	54.6117	31.0735	43.1665	31.0735
MPI-ESM_GLAC1D	-15	-83.4789	-33.2865	812.145	-30.4457	-41.5707	-21.2968	-41.5707	139.762	16.5719	8.9116	24.1744	48.7181	27.3465	38.6107	27.3465
MPI-ESM_GLAC1D	-11.25	-83.4789	-34.3378	820.219	-31.4932	-36.4326	-22.2428	-42.7009	122.089	14.6255	7.58644	24.1407	42.5956	23.7513	33.5752	23.9353
MPI-ESM_GLAC1D	-7.5	-83.4789	-35.4432	831.729	-32.5811	-37.5654	-23.2024	-43.9275	105.098	12.553	6.41422	23.3732	36.3576	20.437	28.4582	20.8664
MPI-ESM_GLAC1D	-3.75	-83.4789	-36.5642	846.838	-33.6677	-38.719	-24.1184	-45.2029	90.9783	10.8203	5.52542	22.738	31.294	17.7437	25.1453	18.135
MPI-ESM_GLAC1D	0	-87.1591	-42.5684	904.717	-45.2101	-27.7685	-29.4095	-51.5102	74.7822	8.03912	4.5627	14.3692	22.929	14.2281	15.8037	18.1404
MPI-ESM_GLAC1D	3.75	-87.1591	-42.709	907.066	-45.3215	-27.883	-29.5162	-51.6957	77.6922	8.40216	4.64697	15.1735	23.9844	14.4294	16.1242	18.9178
MPI-ESM_GLAC1D	7.5	-87.1591	-42.8461	910.02	-45.4295	-27.982	-29.6048	-51.8839	81.396	8.85855	4.76035	15.9809	25.2785	14.7381	16.6094	19.8818
MPI-ESM_GLAC1D	11.25	-87.1591	-42.9813	913.215	-45.5344	-28.0784	-29.6894	-52.072	85.9576	9.4077	4.90779	16.786	26.868	15.2077	17.3108	21.0074
MPI-ESM_GLAC1D	15	-87.1591	-43.1125	916.706	-45.6366	-28.1636	-29.763	-52.2582	91.5399	10.059	5.13418	17.4718	28.7882	15.9001	18.3121	22.3221
MPI-ESM_GLAC1D	18.75	-87.1591	-43.2383	920.577	-45.7368	-28.2372	-29.8274	-52.4398	98.1026	10.8121	5.45263	17.9777	30.9932	16.7999	19.5061	23.8283
MPI-ESM_GLAC1D	22.5	-87.1591	-43.3544	924.888	-45.8312	-28.288	-29.8652	-52.6117	106.013	11.6189	5.89334	18.0924	33.5517	18.2342	21.3222	25.5277
MPI-ESM_GLAC1D	26.25	-87.1591	-43.466	929.241	-45.9243	-28.3342	-29.8958	-52.7784	115.053	12.5527	6.41748	18.2464	36.4916	19.934	23.509	27.3657
MPI-ESM_GLAC1D	30	-87.1591	-43.5733	933.433	-46.0181	-28.372	-29.9225	-52.9353	125.409	13.6368	7.13202	18.1019	39.7265	22.3017	26.4474	29.3291
MPI-ESM_GLAC1D	33.75	-87.1591	-43.6708	937.431	-46.1066	-28.4091	-29.9433	-53.0785	136.981	15.1245	7.93606	18.0211	43.3345	25.2764	30.098	31.3764
MPI-ESM_GLAC1D	37.5	-87.1591	-43.764	941.534	-41.0922	-28.4345	-29.955	-53.2113	149.701	16.7526	9.02281	17.8697	47.1324	28.8789	34.3569	33.5129
MPI-ESM_GLAC1D	41.25	-87.1591	-43.855	944.76	-41.156	-28.4709	-29.9791	-53.3318	163.611	18.5092	10.313	18.013	52.2684	33.2984	39.5689	35.5743
MPI-ESM_GLAC1D	45	-87.1591	-43.9429	947.852	-41.2269	-53.4392	-30.0026	-53.4392	178.249	20.3242	11.919	18.1697	57.4788	37.6167	45.4366	37.6167
MPI-ESM_GLAC1D	48.75	-87.1591	-44.03	950.245	-41.3103	-53.5323	-30.0351	-53.5323	193.713	22.1682	12.994	18.8091	62.9759	39.5883	52.5421	39.5883
MPI-ESM_GLAC1D	52.5	-87.1591	-44.1151	951.931	-41.4021	-53.6098	-30.0794	-53.6098	209.227	23.9994	13.5755	19.9047	68.5758	41.4169	59.7788	41.4169
MPI-ESM_GLAC1D	56.25	-87.1591	-44.2001	952.422	-41.5101	-53.6716	-30.1406	-53.6716	224.769	25.8975	14.0904	21.3368	74.1232	43.0171	67.4611	43.0171
MPI-ESM_GLAC1D	60	-87.1591	-44.2813	952.016	-41.6234	-53.7126	-30.2115	-53.7126	239.703	28.3331	14.524	23.0391	79.4824	44.4173	75.2193	44.4173
MPI-ESM_GLAC1D	63.75	-87.1591	-44.3548	950.48	-35.218	-53.7322	-30.2949	-53.7322	253.477	30.4983	14.8691	24.7548	85.6944	45.5743	82.5506	45.5743
MPI-ESM_GLAC1D	67.5	-87.1591	-44.4191	947.802	-35.3203	-53.7257	-30.388	-53.7257	265.627	32.5817	15.1345	26.5256	91.5453	46.4153	89.293	46.4153
MPI-ESM_GLAC1D	71.25	-87.1591	-44.4678	944.268	-35.4173	-53.6924	-30.4791	-53.6924	275.803	34.4084	15.2833	28.2103	96.6912	46.9706	95.4864	46.9706
MPI-ESM_GLAC1D	75	-87.1591	-44.4984	939.699	-35.5117	-53.6306	-30.5722	-53.6306	283.228	35.7583	15.3374	29.6324	100.644	47.18	100.338	47.18
MPI-ESM_GLAC1D	78.75	-87.1591	-44.5033	934.535	-35.5852	-53.5369	-30.6484	-53.5369	287.918	36.6731	15.292	30.8358	103.475	47.0765	103.914	47.0765
MPI-ESM_GLAC1D	82.5	-87.1591	-44.4828	928.882	-35.6432	-53.4138	-30.7128	-53.4138	289.33	37.0882	15.144	31.7333	104.84	46.6324	105.884	46.6324
MPI-ESM_GLAC1D	86.25	-87.1591	-44.4335	922.756	-35.6757	-53.2595	-30.7565	-53.2595	287.362	37.0181	14.8848	32.3291	104.658	45.8315	105.919	45.8315
MPI-ESM_GLAC1D	90	-87.1591	-44.3526	916.367	-35.6816	-53.0727	-30.7753	-53.0727	282.007	36.4316	14.5479	32.5747	102.957	44.7782	104.159	44.7782
MPI-ESM_GLAC1D	93.75	-87.1591	-44.2416	909.899	-35.6582	-52.8585	-30.7675	-52.8585	273.156	35.2078	14.0984	32.4447	99.5986	43.3659	100.465	43.3659
MPI-ESM_GLAC1D	97.5	-87.1591	-44.1016	903.086	-35.6106	-52.6156	-30.7382	-52.6156	260.867	33.4755	13.5673	31.9102	94.642	41.677	94.9076	41.677
MPI-ESM_GLAC1D	101.25	-87.1591	-43.9336	896.178	-35.5351	-52.3507	-30.6855	-52.3507	245.407	31.1992	12.9636	30.9026	88.2029	39.7727	87.5298	39.7727
MPI-ESM_GLAC1D	105	-87.1591	-43.7396	889.075	-35.4355	-52.0616	-30.6113	-52.0616	227.829	28.5789	12.2997	29.5831	80.7647	37.6882	79.0635	37.6882
MPI-ESM_GLAC1D	108.75	-87.1591	-43.5223	881.754	-41.6599	-51.7536	-30.5175	-51.7536	208.464	25.6579	11.5936	28.0177	72.674	35.4622	69.5506	35.4622
MPI-ESM_GLAC1D	112.5	-87.1591	-43.287	873.863	-41.4704	-51.4294	-30.4205	-51.4294	188.109	22.6792	10.8492	26.3627	65.8532	33.1468	59.6341	33.1468
MPI-ESM_GLAC1D	116.25	-87.1591	-43.0345	865.635	-41.2588	-51.0915	-30.3046	-51.0915	168.203	20.3881	10.062	24.8164	58.8726	30.8393	50.2344	30.8393
MPI-ESM_GLAC1D	120	-87.1591	-42.7674	857.179	-41.0297	-50.7419	-30.1803	-50.7419	149.551	18.1755	9.3232	23.6838	52.2305	28.6485	41.7687	28.6485
MPI-ESM_GLAC1D	123.75	-87.1591	-42.4878	848.389	-40.7842	-50.3852	-30.0514	-50.3852	132.456	16.1172	8.36786	22.9633	45.9661	26.5376	34.3572	26.5376
MPI-ESM_GLAC1D	127.5	-87.1591	-42.1926	839.944	-40.5231	-28.2561	-29.9056	-50.0173	118.078	14.2517	7.06657	22.2826	40.4265	23.8012	28.7366	24.6094
MPI-ESM_GLAC1D	131.25	-87.1591	-41.8797	832.119	-40.2425	-28.0764	-29.7317	-49.6404	106.06	12.7735	6.12723	21.5191	35.6589	20.2561	24.4049	22.9184
MPI-ESM_GLAC1D	135	-87.1591	-41.5469	825.601	-39.9431	-27.8531	-29.5195	-49.2549	96.4562	11.5815	5.48119	20.7727	31.869	17.8011	21.352	21.4594
MPI-ESM_GLAC1D	138.75	-87.1591	-41.1906	820.705	-44.1763	-27.5797	-29.2526	-48.8624	88.946	10.5545	5.057	19.7395	29.0267	16.1764	19.2247	20.2365
MPI-ESM_GLAC1D	142.5	-87.1591	-40.8124	817.323	-43.7805	-27.2567	-28.9368	-48.4652	83.3389	9.71876	4.78528	18.5769	26.8583	15.2201	17.8987	19.2733
MPI-ESM_GLAC1D	146.25	-87.1591	-40.4152	815.52	-43.3638	-26.8869	-28.5755	-48.0668	79.1502	9.0304	4.64512	17.2574	25.1412	14.6949	17.0306	18.5139
MPI-ESM_GLAC1D	150	-87.1591	-40.0054	814.862	-42.9302	-26.4905	-28.1842	-47.6716	76.1431	8.52757	4.56244	16.0948	23.8628	14.4111	16.5363	17.9282
MPI-ESM_GLAC1D	153.75	-87.1591	-39.5926	814.838	-42.4862	-26.0836	-27.7766	-47.2855	74.0386	8.15355	4.53264	15.0325	22.906	14.2843	16.2649	17.5031
MPI-ESM_GLAC1D	157.5	-87.1591	-39.1857	815.391	-42.0448	-25.6773	-27.3684	-46.9145	72.5279	7.86135	4.52766	14.0806	22.1921	14.2529	16.0959	17.1945
MPI-ESM_GLAC1D	161.25	-87.1591	-38.7919	816.437	-41.6125	-25.2802	-26.9661	-46.5642	71.576	7.64364	4.53664	13.3629	21.7105	14.2826	16.0365	16.9777
MPI-ESM_GLAC1D	165	-87.1591	-38.4201	817.734	-41.1991	-24.9032	-26.582	-46.2413	70.982	7.51596	4.55463	12.816	21.3941	14.3431	16.0239	16.8265
MPI-ESM_GLAC1D	168.75	-87.1591	-38.0759	819.241	-40.8098	-24.551	-26.222	-45.9503	70.6662	7.41329	4.57681	12.3798	21.1899	14.4125	16.0352	16.7416
MPI-ESM_GLAC1D	172.5	-87.1591	-37.7668	820.921	-40.4549	-24.2333	-25.8951	-45.6977	70.5028	7.34374	4.60012	12.0192	21.042	14.4859	16.076	16.6915
MPI-ESM_GLAC1D	176.25	-87.1591	-37.4976	822.689	-40.1385	-23.9553	-25.6074	-45.4867	70.4395	7.29195	4.62268	11.7342	20.9503	14.5588	16.1106	16.6745
MPI-ESM_GLAC1D	180	-87.1591	-37.2728	824.678	-39.8677	-23.7183	-25.3613	-45.3227	70.4218	7.24405	4.64104	11.4959	20.875	14.6178	16.1505	16.67
MPI-ESM_GLAC1D	-176.25	-87.1591	-37.0965	826.676	-39.6483	-23.5295	-25.164	-45.2055	70.482	7.23269	4.65817	11.3204	20.8446	14.6863	16.2016	16.678
MPI-ESM_GLAC1D	-172.5	-87.1591	-36.9717	828.789	-39.4836	-23.3896	-25.0156	-45.1391	70.597	7.22862	4.67292	11.2042	20.8423	14.7349	16.246	16.7056
MPI-ESM_GLAC1D	-168.75	-87.1591	-36.8981	830.929	-39.3762	-23.2984	-24.9173	-45.1208	70.7225	7.23907	4.6845	11.1264	20.853	14.7769	16.2856	16.7471
MPI-ESM_GLAC1D	-165	-87.1591	-36.878	833.23	-39.3286	-23.258	-24.871	-45.1534	70.851	7.23831	4.69362	11.0583	20.8594	14.8101	16.333	16.7831
MPI-ESM_GLAC1D	-161.25	-87.1591	-36.9105	835.727	-39.3417	-23.2639	-24.8724	-45.2367	70.9521	7.24838	4.70075	11.0366	20.8799	14.8274	16.3533	16.814
MPI-ESM_GLAC1D	-157.5	-87.1591	-36.9934	838.455	-39.4146	-23.314	-24.9199	-45.3663	71.0503	7.25857	4.70373	11.0344	20.9025	14.8398	16.3724	16.844
MPI-ESM_GLAC1D	-153.75	-87.1591	-37.1254	841.387	-39.5448	-23.4058	-25.0117	-45.5421	71.1104	7.26113	4.70358	11.0362	20.9157	14.8423	16.3867	16.8626
MPI-ESM_GLAC1D	-150	-87.1591	-37.305	844.703	-39.7355	-23.5373	-25.1451	-45.7621	71.1558	7.2663	4.70279	11.0475	20.9283	14.8427	16.3953	16.8853
MPI-ESM_GLAC1D	-146.25	-87.1591	-37.5279	848.338	-39.979	-23.704	-25.317	-46.0225	71.1748	7.26279	4.69834	11.0532	20.9313	14.843	16.408	16.8924
MPI-ESM_GLAC1D	-142.5	-87.1591	-37.7897	852.546	-40.272	-23.898	-25.5182	-46.3214	71.1526	7.26023	4.69208	11.0542	20.916	14.8295	16.411	16.8906
MPI-ESM_GLAC1D	-138.75	-87.1591	-38.0861	857.189	-40.6118	-24.1168	-25.746	-46.6514	71.1212	7.2677	4.68461	11.1019	20.9194	14.8326	16.4329	16.8705
MPI-ESM_GLAC1D	-135	-87.1591	-38.4118	862.417	-40.9907	-24.3511	-25.9915	-47.0102	71.0732	7.26709	4.67393	11.1474	20.9109	14.8183	16.4409	16.851
MPI-ESM_GLAC1D	-131.25	-87.1591	-38.7601	868.201	-41.4009	-24.5985	-26.2513	-47.391	71.0113	7.26758	4.66963	11.1689	20.8916	14.8281	16.4802	16.8081
MPI-ESM_GLAC1D	-127.5	-87.1591	-39.1237	874.564	-41.8332	-24.8518	-26.5175	-47.7875	70.9199	7.25076	4.66352	11.1505	20.8546	14.8429	16.5141	16.7658
MPI-ESM_GLAC1D	-123.75	-87.1591	-39.4964	881.339	-42.2785	-25.1037	-26.7858	-48.1938	70.7768	7.24129	4.65741	11.1568	20.8096	14.8405	16.527	16.7075
MPI-ESM_GLAC1D	-120	-87.1591	-39.8688	888.466	-42.7258	-25.3505	-27.0481	-48.6	70.6129	7.22379	4.65508	11.121	20.7497	14.8608	16.5468	16.6287
MPI-ESM_GLAC1D	-116.25	-87.1591	-40.2331	895.704	-43.1626	-25.5875	-27.3014	-48.9984	70.4455	7.20565	4.64964	11.109	20.6981	14.8635	16.5546	16.5607
MPI-ESM_GLAC1D	-112.5	-87.1591	-40.579	902.85	-43.5754	-25.8095	-27.5377	-49.3786	70.2924	7.18769	4.64278	11.1131	20.6513	14.8682	16.5715	16.4969
MPI-ESM_GLAC1D	-108.75	-87.1591	-40.8986	909.507	-43.9523	-26.0159	-27.7545	-49.7322	70.0682	7.16103	4.63701	11.0801	20.5863	14.8707	16.5635	16.4236
MPI-ESM_GLAC1D	-105	-87.1591	-41.1843	915.487	-44.285	-26.2008	-27.9518	-50.0486	69.7945	7.12455	4.63203	11.0408	20.503	14.8478	16.5229	16.3311
MPI-ESM_GLAC1D	-101.25	-87.1591	-41.4291	920.495	-44.5643	-26.3577	-28.1178	-50.3194	69.5185	7.08702	4.62648	11.0008	20.4228	14.8122	16.4573	16.2547
MPI-ESM_GLAC1D	-97.5	-87.1591	-41.6293	924.198	-44.7863	-26.497	-28.263	-50.5395	69.2088	7.05387	4.61777	10.9728	20.3367	14.7561	16.3752	16.1665
MPI-ESM_GLAC1D	-93.75	-87.1591	-41.7813	926.665	-44.9491	-26.6077	-28.3776	-50.7042	68.8971	7.01159	4.60668	10.9097	20.2418	14.7158	16.3052	16.0869
MPI-ESM_GLAC1D	-90	-87.1591	-41.8863	927.87	-45.0526	-26.6916	-28.4628	-50.8148	68.5928	6.96938	4.5954	10.8527	20.1478	14.673	16.2331	16.0015
MPI-ESM_GLAC1D	-86.25	-87.1591	-41.9486	927.706	-45.1014	-26.758	-28.528	-50.8741	68.2851	6.92487	4.5842	10.7846	20.0543	14.6221	16.1541	15.9242
MPI-ESM_GLAC1D	-82.5	-87.1591	-41.9714	926.664	-45.1073	-26.7984	-28.5631	-50.8878	68.0101	6.88844	4.5773	10.713	19.9637	14.5784	16.0846	15.8591
MPI-ESM_GLAC1D	-78.75	-87.1591	-41.9624	924.807	-45.0747	-26.8192	-28.5781	-50.8656	67.7691	6.85562	4.56746	10.6518	19.8883	14.544	16.0233	15.8046
MPI-ESM_GLAC1D	-75	-87.1591	-41.9307	922.316	-45.0194	-26.8251	-28.5787	-50.8142	67.5352	6.81873	4.56138	10.563	19.8083	14.5111	15.9565	15.7546
MPI-ESM_GLAC1D	-71.25	-87.1591	-41.8814	919.473	-44.9426	-26.8231	-28.5683	-50.7439	67.3297	6.79897	4.55278	10.5405	19.756	14.4654	15.8808	15.7082
MPI-ESM_GLAC1D	-67.5	-87.1591	-41.8216	916.595	-44.8566	-26.8088	-28.5462	-50.6625	67.1555	6.77954	4.54626	10.5074	19.7056	14.4303	15.822	15.6711
MPI-ESM_GLAC1D	-63.75	-87.1591	-41.759	913.454	-44.7687	-26.7965	-28.5266	-50.5759	66.9921	6.76347	4.53773	10.4828	19.6573	14.3877	15.7601	15.6396
MPI-ESM_GLAC1D	-60	-87.1591	-41.6963	910.544	-44.6822	-26.7795	-28.5019	-50.4913	66.8586	6.75386	4.53064	10.4849	19.6236	14.3538	15.7114	15.6075
MPI-ESM_GLAC1D	-56.25	-87.1591	-41.6405	907.719	-44.6021	-26.7685	-28.483	-50.4151	66.7436	6.74646	4.52151	10.4957	19.5947	14.316	15.6629	15.5838
MPI-ESM_GLAC1D	-52.5	-87.1591	-41.5944	905.232	-44.535	-26.7606	-28.4648	-50.352	66.6535	6.73896	4.51329	10.4973	19.5709	14.2955	15.6368	15.5645
MPI-ESM_GLAC1D	-48.75	-87.1591	-41.5622	902.897	-44.4823	-26.7646	-28.4609	-50.3044	66.5867	6.74047	4.50556	10.5222	19.559	14.2687	15.6076	15.5545
MPI-ESM_GLAC1D	-45	-87.1591	-41.5449	900.957	-44.4458	-26.7756	-28.4661	-50.2758	66.54	6.74888	4.49783	10.5766	19.5653	14.2416	15.5766	15.5462
MPI-ESM_GLAC1D	-41.25	-87.1591	-41.5459	899.311	-44.4289	-26.8017	-28.4856	-50.268	66.509	6.76012	4.49025	10.6454	19.58	14.2099	15.541	15.5479
MPI-ESM_GLAC1D	-37.5	-87.1591	-41.5638	898.058	-44.4289	-26.8388	-28.5175	-50.2823	66.5234	6.78211	4.48104	10.7463	19.6173	14.178	15.5071	15.5649
MPI-ESM_GLAC1D	-33.75	-87.1591	-41.6009	897.102	-44.4484	-26.8909	-28.5651	-50.3188	66.5637	6.80576	4.47018	10.8727	19.6704	14.1357	15.4635	15.5872
MPI-ESM_GLAC1D	-30	-87.1591	-41.6564	896.55	-44.4855	-26.954	-28.6243	-50.3799	66.6811	6.84672	4.45871	11.0382	19.755	14.0937	15.4251	15.6419
MPI-ESM_GLAC1D	-26.25	-87.1591	-41.7295	896.389	-44.5402	-27.0315	-28.6992	-50.4639	66.8876	6.90273	4.45045	11.2505	19.8831	14.0553	15.3856	15.7246
MPI-ESM_GLAC1D	-22.5	-87.1591	-41.8181	896.618	-44.6099	-27.1174	-28.7812	-50.5681	67.2134	6.97168	4.44272	11.5041	20.0523	14.0199	15.353	15.8467
MPI-ESM_GLAC1D	-18.75	-87.1591	-41.9217	897.104	-44.6939	-27.2144	-28.8756	-50.6898	67.6991	7.05625	4.43642	11.7834	20.2707	14.0042	15.3494	16.0183
MPI-ESM_GLAC1D	-15	-87.1591	-42.0365	898.005	-44.787	-27.3179	-28.9772	-50.8311	68.4075	7.16657	4.43706	12.1269	20.5641	13.9965	15.355	16.2537
MPI-ESM_GLAC1D	-11.25	-87.1591	-42.1597	899.214	-44.8853	-27.4267	-29.082	-50.9848	69.4068	7.31824	4.44604	12.5415	20.9486	14.0016	15.388	16.5741
MPI-ESM_GLAC1D	-7.5	-87.1591	-42.292	900.615	-44.9914	-27.5425	-29.1953	-51.1508	70.7276	7.51004	4.46392	13.0546	21.444	14.026	15.4561	16.9849
MPI-ESM_GLAC1D	-3.75	-87.1591	-42.4291	902.503	-45.1001	-27.6571	-29.3046	-51.3279	72.4669	7.72896	4.50322	13.6376	22.0822	14.0946	15.5918	17.4932
MPI-ESM_ICE6G	-37.5	83.4789	-16.0122	1231	-2.57464	-30.3165	0.0910278	-30.3165	269.532	40.3503	12.2108	41.4648	106.813	37.8165	102.327	37.8165
MPI-ESM_ICE6G	-33.75	83.4789	-15.8518	1232.24	-2.37755	-30.1566	0.266545	-30.1566	284.925	43.159	13.2175	41.6633	112.575	40.6895	110.358	40.6895
MPI-ESM_ICE6G	-30	83.4789	-15.6032	1231.57	-2.1118	-29.9071	0.491947	-29.9071	293.926	44.5366	14.2197	40.2263	115.093	43.6811	111.585	43.6811
MPI-ESM_ICE6G	-26.25	83.4789	-15.4137	1229.21	-1.95745	-29.6627	0.694279	-29.6627	298.338	43.9654	15.265	37.3407	115.013	47.0663	107.704	47.0663
MPI-ESM_ICE6G	15	79.777	-7.69933	838.704	-1.21107	-16.3149	2.93032	-17.5247	217.548	26.1466	12.1835	20.3096	69.0515	41.3701	65.8766	45.6147
MPI-ESM_ICE6G	18.75	79.777	-8.07728	828.637	-1.60468	-16.6813	2.3663	-17.8617	224.21	28.5011	12.6041	22.8949	73.9064	41.3564	68.605	44.8477
MPI-ESM_ICE6G	-90	79.777	-13.3558	1319.75	0.524988	-29.722	3.04769	-29.722	226.095	34.943	8.33466	43.8871	89.9639	27.9714	82.8923	27.9714
MPI-ESM_ICE6G	-86.25	79.777	-13.553	1328.08	0.452834	-29.9046	3.06279	-29.9046	240.475	38.1813	8.44728	46.3214	98.7268	28.5067	92.9041	28.5067
MPI-ESM_ICE6G	-82.5	79.777	-13.7732	1326.8	0.256525	-29.9947	2.94335	-29.9947	252.185	40.0859	8.69579	46.2811	103.766	29.8299	96.535	29.8299
MPI-ESM_ICE6G	-78.75	79.777	-15.044	1175.46	-7.14708	-29.5946	-0.261359	-29.5946	240.218	38.1872	9.26509	45.6188	99.3581	31.3654	81.5729	31.3654
MPI-ESM_ICE6G	-75	79.777	-14.5297	1301.63	-0.684556	-30.1748	2.11405	-30.1748	291.747	45.1758	9.89885	46.8784	119.415	33.335	112.948	33.335
MPI-ESM_ICE6G	-71.25	79.777	-15.0049	1269.92	-1.42977	-30.1193	1.38425	-30.1193	311.564	48.0754	10.4358	48.5777	130.163	34.4929	121.899	34.4929
MPI-ESM_ICE6G	-63.75	79.777	-16.9377	1081.55	-10.2951	-29.5852	-2.54312	-29.5852	287.4	43.7948	10.4838	48.0238	120.389	35.2618	98.0291	35.2618
MPI-ESM_ICE6G	-60	79.777	-17.8086	1059.45	-6.03015	-29.9456	-3.52481	-29.9456	274.365	41.6503	9.7136	47.2928	115.963	33.4887	96.8815	33.4887
MPI-ESM_ICE6G	-56.25	79.777	-18.6636	1044.51	-6.98727	-30.4231	-4.44786	-30.4231	256.111	38.3069	9.13259	46.4179	108.032	31.7643	91.8108	31.7643
MPI-ESM_ICE6G	-52.5	79.777	-19.5341	1033.5	-7.90244	-31.0151	-5.39487	-31.0151	233.501	34.543	8.29432	45.3755	98.2032	29.4239	84.3387	29.4239
MPI-ESM_ICE6G	-48.75	79.777	-20.3136	1028.9	-8.71027	-31.6056	-6.18232	-31.6056	212.679	31.0608	7.90058	43.5523	88.291	27.7147	77.0634	27.7147
MPI-ESM_ICE6G	-45	79.777	-20.9088	1030.08	-9.28277	-32.1125	-6.73269	-32.1125	195.894	28.0986	7.77956	41.7897	80.4435	26.4994	70.4918	26.4994
MPI-ESM_ICE6G	-41.25	79.777	-21.236	1034.22	-9.55972	-32.4238	-6.99332	-32.4238	185.604	26.24	8.23593	39.4095	74.5262	26.4735	65.6902	26.4735
MPI-ESM_ICE6G	-37.5	79.777	-21.168	1043.06	-9.3817	-32.4049	-6.79989	-32.4049	189.369	26.5185	8.89638	37.1378	74.5778	28.6535	66.9012	28.6535
MPI-ESM_ICE6G	-33.75	79.777	-20.6566	1056.25	-8.68143	-32.0379	-6.13312	-32.0379	207.608	28.6586	10.285	35.8973	81.0334	33.0369	73.1096	33.0369
MPI-ESM_ICE6G	-30	79.777	-19.71	1069.27	-7.54339	-28.8554	-5.02963	-31.2587	241.705	33.1658	12.5839	34.9228	93.4804	40.0291	84.2629	40.1127
MPI-ESM_ICE6G	-26.25	79.777	-18.4082	1076.4	-6.17678	-27.763	-3.65998	-30.1117	287.96	39.1934	15.6816	34.142	110.307	48.1062	99.1604	49.7672
MPI-ESM_ICE6G	-22.5	79.777	-16.1613	1176.11	-2.84511	-26.0925	-0.286119	-28.9925	367.026	49.9805	18.9054	37.5275	144.476	58.148	136.736	61.1035
MPI-ESM_ICE6G	-18.75	79.777	-14.7482	1159.97	-1.57158	-24.754	0.882328	-27.4962	397.045	52.3533	20.9182	32.5417	148.506	66.719	133.37	71.5058
MPI-ESM_ICE6G	97.5	76.0702	-12.2435	1257.71	3.71303	-26.7531	3.71303	-26.7531	286.493	40.4309	10.995	46.6125	119.626	36.0419	119.626	36.0419
MPI-ESM_ICE6G	101.25	76.0702	-12.5812	1279.5	3.74222	-27.259	3.74222	-27.259	282.43	41.0137	10.1867	50.008	122.274	33.4201	122.274	33.4201
MPI-ESM_ICE6G	105	76.0702	-12.9174	1289.95	1.81107	-27.6907	3.5694	-27.6907	223.876	32.4639	8.80705	42.7899	89.5869	29.1263	87.3765	29.1263
MPI-ESM_ICE6G	108.75	76.0702	-13.1755	1291.18	1.50185	-27.9824	3.32384	-27.9824	214.321	32.4444	8.74025	42.7473	87.3055	28.2953	80.1196	28.2953
MPI-ESM_ICE6G	-116.25	76.0702	-11.8732	1257.11	1.30287	-27.9793	3.30524	-27.9793	197.865	27.3495	10.178	33.8352	73.8432	31.4004	67.7619	31.4004
MPI-ESM_ICE6G	-112.5	76.0702	-11.9175	1271.53	1.41877	-28.1456	3.52357	-28.1456	198.649	27.2531	10.185	33.4291	73.4688	31.1062	66.0991	31.1062
MPI-ESM_ICE6G	-86.25	76.0702	-11.5791	1365.1	3.00612	-28.5881	5.31753	-28.5881	263.697	35.8017	10.5669	40.6416	99.8357	34.5765	96.1948	34.5765
MPI-ESM_ICE6G	-82.5	76.0702	-11.3413	1365.04	3.30709	-28.2235	5.64572	-28.2235	269.489	36.6064	10.8603	40.0188	102.382	35.8157	97.6468	35.8157
MPI-ESM_ICE6G	-60	76.0702	-15.6501	939.59	-5.1986	-26.0922	-2.83392	-26.0922	348.641	45.751	15.1822	38.9045	133.032	49.3584	122.057	49.3584
MPI-ESM_ICE6G	-56.25	76.0702	-17.4704	911.85	-7.26106	-27.6718	-4.81872	-27.2109	347.294	48.2102	13.8531	42.2377	136.67	42.214	133.374	46.5368
MPI-ESM_ICE6G	-52.5	76.0702	-19.5964	889.87	-9.57758	-29.4187	-7.18919	-28.8943	338.132	47.3993	13.0833	42.0934	133.177	40.3194	129.775	44.9379
MPI-ESM_ICE6G	-48.75	76.0702	-21.6748	895.397	-11.5892	-30.8922	-9.17102	-31.5127	318.657	43.6326	12.712	40.3561	123.711	43.3922	120.225	39.3856
MPI-ESM_ICE6G	-45	76.0702	-23.4341	918.991	-13.1135	-32.8176	-10.6115	-33.5457	269.467	34.9324	11.5184	36.7306	102.062	38.8255	98.0551	35.5383
MPI-ESM_ICE6G	-41.25	76.0702	-24.624	947.789	-13.992	-34.2857	-11.4461	-35.1039	203.764	25.7557	10.1017	31.0012	74.3486	33.1825	69.6385	31.065
MPI-ESM_ICE6G	-37.5	76.0702	-25.1495	964.34	-14.3347	-35.023	-11.8168	-35.8869	161.198	20.0645	9.55088	28.2373	58.6406	29.7107	52.26	28.9479
MPI-ESM_ICE6G	-33.75	76.0702	-24.8385	967.521	-13.991	-26.8798	-11.4986	-35.6281	162.42	21.2492	9.09284	31.3672	61.7108	28.4923	53.949	31.3189
MPI-ESM_ICE6G	-30	76.0702	-23.3444	964.466	-12.4447	-25.5228	-10.0932	-34.0884	205.821	27.8127	10.9689	33.6722	79.7594	35.1349	68.405	41.0979
MPI-ESM_ICE6G	-26.25	76.0702	-20.7214	955.616	-9.74021	-23.1918	-7.64192	-31.3524	285.304	39.3251	15.024	33.872	109.805	48.5875	92.4153	59.0088
MPI-ESM_ICE6G	-22.5	76.0702	-16.4531	1048.8	-4.2491	-24.828	-2.23364	-28.111	422.538	57.1789	20.786	36.54	167.276	69.8753	150.146	83.3629
MPI-ESM_ICE6G	52.5	72.3616	-7.60551	925.115	3.54549	-19.3957	3.54549	-19.0639	348.474	41.9007	17.5712	31.7229	124.073	53.3005	124.073	56.2493
MPI-ESM_ICE6G	56.25	72.3616	-8.45969	1000.31	3.43126	-21.3206	3.80292	-20.6553	357.898	42.1965	17.8783	28.1587	120.894	55.0935	113.642	59.0421
MPI-ESM_ICE6G	67.5	72.3616	-10.2146	1163.28	3.52338	-23.8245	4.42065	-23.8245	369.029	46.2055	18.666	31.4721	133.66	58.7721	123.017	58.7721
MPI-ESM_ICE6G	71.25	72.3616	-10.3964	1199.92	3.77563	-24.253	4.80257	-25.5039	361.344	46.1401	18.2615	32.7583	133.852	57.3461	121.948	55.8612
MPI-ESM_ICE6G	75	72.3616	-10.5058	1230.14	4.03984	-24.5527	5.18836	-25.8552	355.006	46.0013	17.3249	34.96	134.639	55.3167	123.833	53.7669
MPI-ESM_ICE6G	78.75	72.3616	-10.5913	1256.29	4.25963	-24.8083	5.55253	-26.1349	348.109	46.4238	16.9172	37.1798	135.104	53.4263	124.282	52.6113
MPI-ESM_ICE6G	82.5	72.3616	-10.7339	1282.8	4.40306	-25.1353	5.86978	-26.4692	345.298	47.4241	16.0911	39.0416	135.613	51.4265	127.063	50.6528
MPI-ESM_ICE6G	86.25	72.3616	-11.006	1311.27	4.44338	-25.5809	6.10354	-26.9236	350.071	50.6662	15.3313	42.0037	140.778	49.4656	133.928	48.6247
MPI-ESM_ICE6G	90	72.3616	-11.3805	1343.38	4.39715	-26.1836	6.27506	-27.5685	353.884	55.3463	14.6622	45.4291	145.575	47.5635	142.267	46.6799
MPI-ESM_ICE6G	93.75	72.3616	-11.8218	1379.29	6.40268	-26.9216	6.40268	-28.3741	356.694	58.6947	14.2729	49.4492	151.153	44.8243	151.153	44.1004
MPI-ESM_ICE6G	97.5	72.3616	-12.2587	1415.46	6.50853	-27.7036	6.50853	-29.2148	357.236	64.655	13.1875	55.856	161.917	41.2904	161.917	40.7396
MPI-ESM_ICE6G	101.25	72.3616	-12.6062	1445.38	6.59787	-28.3418	6.59787	-29.9011	352.971	68.4575	12.2368	61.8993	170.226	37.7755	170.226	37.0916
MPI-ESM_ICE6G	105	72.3616	-12.8116	1469.43	6.72721	-28.8125	6.72721	-30.3997	346.343	70.1794	11.2469	66.733	174.89	34.4408	174.89	33.7678
MPI-ESM_ICE6G	108.75	72.3616	-12.8836	1483.95	6.83011	-29.0905	6.83011	-30.6696	323.73	63.527	10.0485	67.4985	166.028	31.1865	166.028	31.0289
MPI-ESM_ICE6G	112.5	72.3616	-12.8706	1490.82	6.90272	-29.2045	6.90272	-30.7681	293.183	54.3912	9.50113	64.8865	147.402	29.3371	147.402	29.1221
MPI-ESM_ICE6G	116.25	72.3616	-12.8385	1488.85	6.86664	-29.2217	6.86664	-30.7357	265.941	46.1447	8.95782	61.6088	130.4	27.6497	130.4	27.3042
MPI-ESM_ICE6G	120	72.3616	-12.8577	1479.83	6.65756	-29.2289	6.65756	-30.7235	245.873	41.432	8.66597	58.0119	116.633	26.9206	116.633	27.0036
MPI-ESM_ICE6G	123.75	72.3616	-12.9563	1464.47	6.27204	-29.2092	6.27204	-30.7121	232.136	36.7447	8.31749	54.8569	106.504	26.3324	106.504	26.6796
MPI-ESM_ICE6G	127.5	72.3616	-13.1798	1448.53	5.75284	-29.2742	5.75284	-30.8059	229.373	35.3865	8.31994	52.4365	101.883	26.7032	101.883	27.8261
MPI-ESM_ICE6G	131.25	72.3616	-13.5366	1435.36	2.56533	-29.4952	5.17767	-30.9714	226.726	35.2323	8.93149	49.0996	97.5634	28.5562	95.1318	29.9966
MPI-ESM_ICE6G	138.75	72.3616	-13.8982	1390.93	4.10117	-29.4671	4.10117	-30.8607	259.543	42.2076	10.0651	54.4853	119.11	31.8562	119.11	33.3366
MPI-ESM_ICE6G	142.5	72.3616	-13.8127	1364.45	3.77825	-29.1482	3.77825	-30.49	242.112	38.9564	9.77003	50.6829	106.449	31.8899	106.449	33.7774
MPI-ESM_ICE6G	146.25	72.3616	-13.6411	1337.58	1.18765	-24.3224	3.56242	-29.9861	215.962	35.0811	9.45546	44.0008	90.393	31.3704	85.858	34.0856
MPI-ESM_ICE6G	-123.75	72.3616	-8.6891	1384.14	8.28941	-21.0605	8.28941	-26.1081	253.578	33.9026	12.8255	32.3374	93.8845	40.5769	93.8845	44.2381
MPI-ESM_ICE6G	-120	72.3616	-8.92494	1399.16	5.58594	-21.2344	8.37066	-26.3597	269.165	35.3591	14.1094	32.3135	99.9513	43.9246	93.9823	45.5455
MPI-ESM_ICE6G	-116.25	72.3616	-9.23602	1400.63	5.34353	-21.5046	8.14834	-26.6061	254.87	32.8476	13.9907	31.1218	94.3237	43.551	84.7425	43.6117
MPI-ESM_ICE6G	-112.5	72.3616	-9.52954	1397.16	5.0537	-26.8505	7.81453	-26.8505	247.144	31.8736	13.9911	30.4575	90.3495	42.3995	78.5919	42.3995
MPI-ESM_ICE6G	-108.75	72.3616	-9.77797	1388.74	-0.56095	-27.0666	7.42118	-27.0666	243.939	32.5933	13.5233	30.7257	88.9359	41.3086	71.6952	41.3086
MPI-ESM_ICE6G	-93.75	72.3616	-10.4164	1371.4	4.0622	-27.7109	6.3945	-27.7109	297.385	40.8174	12.9197	39.6563	113.723	40.8406	108.287	40.8406
MPI-ESM_ICE6G	-86.25	72.3616	-10.1616	1383.39	6.84727	-27.5561	6.84727	-27.5561	339.28	47.8945	13.4123	46.1497	139.333	43.4593	139.333	43.4593
MPI-ESM_ICE6G	-82.5	72.3616	-9.72208	1390.88	7.44388	-27.1038	7.44388	-27.1038	347.183	53.197	14.125	49.2485	149.011	43.968	149.011	43.968
MPI-ESM_ICE6G	-78.75	72.3616	-8.92287	1388.89	8.26131	-26.2029	8.26131	-26.2029	334.362	52.8155	14.0063	46.8322	139.808	44.487	139.808	44.487
MPI-ESM_ICE6G	-75	72.3616	-8.17387	1387.28	9.08894	-25.2727	9.08894	-25.2727	296.443	45.2321	13.5233	42.3642	120.129	43.9557	120.129	43.9557
MPI-ESM_ICE6G	-56.25	72.3616	-12.0197	1026.52	1.82812	-23.8977	1.82812	-23.8977	383.333	65.1162	16.0644	47.3484	162.829	50.3345	162.829	50.3345
MPI-ESM_ICE6G	-52.5	72.3616	-15.8059	838.009	-4.1421	-25.1903	-4.1421	-25.1903	372.618	56.0992	16.4765	38.8702	143.86	51.9076	143.86	51.9076
MPI-ESM_ICE6G	-48.75	72.3616	-19.0579	822.319	-7.61091	-28.1614	-7.61091	-28.1614	386.357	55.1066	17.9183	35.5925	144.111	55.9556	144.111	55.9556
MPI-ESM_ICE6G	-45	72.3616	-21.9121	841.584	-12.3771	-31.2381	-10.2642	-31.2381	353.362	44.3464	18.6705	28.2614	122.883	57.8619	121.079	57.8619
MPI-ESM_ICE6G	-41.25	72.3616	-23.7308	883.046	-13.68	-33.6405	-11.6012	-33.6405	290.631	32.8968	18.7283	21.7417	96.2437	56.942	89.3341	56.942
MPI-ESM_ICE6G	-37.5	72.3616	-24.4479	907.776	-19.4047	-20.0332	-12.0731	-34.7163	242.128	30.1852	12.8816	22.6303	79.8084	45.2395	66.2849	56.9907
MPI-ESM_ICE6G	-33.75	72.3616	-23.8685	902.698	-13.4978	-19.576	-11.5129	-33.9732	266.758	36.3364	13.3079	28.5321	94.0396	45.3439	74.9071	64.509
MPI-ESM_ICE6G	-30	72.3616	-21.2735	879.117	-11.0305	-17.3669	-9.22117	-31.0374	358.541	49.0368	19.0955	30.1757	129.847	62.1391	104.721	86.5729
MPI-ESM_ICE6G	-26.25	72.3616	-17.1516	923.227	-6.73073	-18.8047	-4.57382	-27.4025	491.951	62.9996	26.5651	27.0163	173.063	90.4688	147.396	117.401
MPI-ESM_ICE6G	-22.5	72.3616	-12.1955	884.698	-1.4235	-14.5894	-0.398484	-22.1049	630.651	79.7263	33.4696	26.7931	223.432	116.191	193.314	148.545
MPI-ESM_ICE6G	18.75	68.652	0.352327	759.235	10.2283	-7.74483	10.2283	-8.74982	608.092	83.3065	30.3658	38.1573	235.76	94.6074	235.76	91.8681
MPI-ESM_ICE6G	22.5	68.652	-0.622229	812.585	9.85105	-10.45	9.85105	-10.45	552.404	72.2431	26.427	37.7999	210.236	80.7401	210.236	80.7401
MPI-ESM_ICE6G	26.25	68.652	-1.41643	836.996	9.24754	-11.6972	9.24754	-11.6972	523.106	68.4356	24.8771	37.0108	195.993	76.3706	195.993	76.3706
MPI-ESM_ICE6G	30	68.652	-1.92021	823.814	8.50448	-12.1385	8.50448	-11.4108	496.097	58.7295	25.5028	31.0281	168.929	77.4246	168.929	80.3937
MPI-ESM_ICE6G	52.5	68.652	-6.21855	1047.69	7.26922	-19.6902	7.26922	-18.4448	436.999	55.097	19.9106	32.9677	157.603	62.8934	157.603	69.1953
MPI-ESM_ICE6G	56.25	68.652	-7.09163	1128.67	7.53562	-21.6012	7.53562	-21.6012	460.098	59.9785	20.6084	33.9423	164.869	65.0972	164.869	65.0972
MPI-ESM_ICE6G	60	68.652	-7.76066	1195.55	6.46054	-23.1248	7.76997	-23.1248	478.783	62.0722	21.2925	34.5555	173.163	66.7748	170.07	66.7748
MPI-ESM_ICE6G	63.75	68.652	-8.2521	1250.05	6.59336	-24.2323	8.00869	-24.2323	491.213	64.8851	21.8554	35.9177	182.897	67.9321	174.83	67.9321
MPI-ESM_ICE6G	67.5	68.652	-8.56329	1282.84	6.69757	-24.8329	8.11979	-24.8329	491.307	66.2549	21.7404	37.6612	186.329	66.8497	179.732	66.8497
MPI-ESM_ICE6G	71.25	68.652	-8.66127	1303.29	6.89023	-24.9999	8.33094	-24.9999	475.729	64.8468	21.2423	38.2624	181.593	64.6921	174.734	64.6921
MPI-ESM_ICE6G	75	68.652	-8.71357	1312.51	6.99551	-24.9706	8.45722	-24.9706	453.831	58.0867	20.4177	37.1351	170.122	62.6255	164.356	62.6255
MPI-ESM_ICE6G	78.75	68.652	-8.87082	1317.75	6.92318	-25.0422	8.4341	-25.0422	448.917	58.5937	19.9397	38.0528	169.262	61.4083	164.154	61.4083
MPI-ESM_ICE6G	82.5	68.652	-9.23175	1323.47	6.62318	-23.5582	8.21531	-25.3608	452.869	60.599	19.8348	39.8121	173.128	64.2436	168.937	61.1262
MPI-ESM_ICE6G	86.25	68.652	-9.83025	1337.29	6.1319	-24.2635	7.85654	-26.0665	465.64	65.2953	20.3692	42.4324	181.993	64.6893	180.256	62.2302
MPI-ESM_ICE6G	90	68.652	-10.603	1361.66	5.55836	-25.2284	7.45221	-27.0761	469.225	70.3897	19.9678	45.1	187.966	62.8631	187.599	60.3501
MPI-ESM_ICE6G	93.75	68.652	-11.3862	1395.24	5.07806	-26.3007	7.16018	-28.2133	451.527	67.1875	18.6422	46.3979	184.182	58.9236	183.648	56.1079
MPI-ESM_ICE6G	97.5	68.652	-12.094	1428.92	6.90196	-27.3317	6.90196	-29.3046	439.156	70.6391	16.9551	51.5307	190.565	53.4032	190.565	50.9607
MPI-ESM_ICE6G	101.25	68.652	-12.5557	1460.45	6.85518	-28.1232	6.85518	-30.1616	420.595	74.0414	14.5241	58.7261	196.694	45.9289	196.694	43.5744
MPI-ESM_ICE6G	105	68.652	-12.6714	1489.9	7.14729	-28.5584	7.14729	-30.6103	403.55	74.551	12.3966	65.2121	200.842	39.7484	200.842	37.8196
MPI-ESM_ICE6G	108.75	68.652	-12.4824	1515.72	7.68782	-30.7185	7.68782	-30.7185	377.841	72.3876	10.5966	70.0146	196.788	33.1488	196.788	33.1488
MPI-ESM_ICE6G	112.5	68.652	-12.1326	1538.71	8.3343	-28.6323	8.3343	-30.6403	336.513	64.2111	9.41003	70.2049	176.382	31.0121	176.382	29.8823
MPI-ESM_ICE6G	116.25	68.652	-11.7852	1555.84	8.91758	-28.4966	8.91758	-30.471	294.88	54.953	8.84452	66.994	150.639	28.2985	150.639	27.8506
MPI-ESM_ICE6G	120	68.652	-11.649	1568.92	9.2298	-28.4898	9.2298	-30.4974	269.167	47.3178	8.72307	62.4204	132.833	27.3105	132.833	27.7348
MPI-ESM_ICE6G	123.75	68.652	-11.8848	1580.39	9.10912	-28.795	9.10912	-30.8997	267.729	43.9968	9.233	57.8272	126.405	29.019	126.405	30.2257
MPI-ESM_ICE6G	127.5	68.652	-12.4255	1585.43	8.63093	-29.2484	8.63093	-31.4459	276.47	42.8859	9.92136	55.0819	126.467	31.1039	126.467	32.2957
MPI-ESM_ICE6G	131.25	68.652	-13.2135	1580.66	7.7618	-29.8727	7.7618	-32.1007	298.716	48.6427	10.5383	57.8574	139.503	33.0877	139.503	34.4378
MPI-ESM_ICE6G	135	68.652	-13.943	1568.85	6.85848	-30.4026	6.85848	-32.6274	325.42	56.5823	11.1814	61.6772	157.35	35.1611	157.35	36.511
MPI-ESM_ICE6G	138.75	68.652	-14.3099	1551.39	6.2778	-30.5715	6.2778	-32.7488	351.595	63.3551	12.1447	63.5325	173.172	38.6769	173.172	40.2795
MPI-ESM_ICE6G	142.5	68.652	-14.2668	1524.82	5.97762	-30.2911	5.97762	-32.3724	384.586	71.7528	13.7282	62.5943	188.251	44.3535	188.251	45.6379
MPI-ESM_ICE6G	146.25	68.652	-13.8397	1495.6	6.03818	-29.6453	6.03818	-31.6032	402.581	74.2142	15.2521	59.2722	191.376	49.3052	191.376	50.6998
MPI-ESM_ICE6G	150	68.652	-13.1942	1465.63	6.31795	-28.7805	6.31795	-30.6152	384.774	68.2975	15.9882	53.7373	173.259	50.7292	173.259	52.183
MPI-ESM_ICE6G	153.75	68.652	-12.5929	1438.73	6.58046	-23.093	6.58046	-29.6808	352.753	62.5405	15.6268	50.4715	153.02	47.8641	153.02	50.4633
MPI-ESM_ICE6G	157.5	68.652	-12.2635	1411.63	3.86118	-22.6734	6.55264	-29.0578	317.167	54.4488	14.2594	47.1815	134.42	43.6097	132.072	47.1477
MPI-ESM_ICE6G	161.25	68.652	-12.3141	1384.7	3.58235	-22.6002	6.12272	-28.7736	306.208	49.7972	13.6545	44.5234	127.773	42.7989	122.827	46.5146
MPI-ESM_ICE6G	165	68.652	-12.647	1356.48	3.06285	-22.8391	5.3673	-28.8081	318.061	47.9746	14.3409	41.6715	129.523	45.1812	122.704	49.3611
MPI-ESM_ICE6G	168.75	68.652	-13.0558	1316.69	2.33295	-23.1746	4.2538	-28.9399	360.96	51.5695	17.0476	39.987	144.693	52.1686	135.543	56.7936
MPI-ESM_ICE6G	172.5	68.652	-13.1985	1268.42	1.75223	-23.3249	3.19993	-28.8119	414.257	56.5996	20.1307	36.693	160.604	62.0255	146.546	66.1447
MPI-ESM_ICE6G	176.25	68.652	-12.8589	1213.06	1.4791	-23.0419	2.45218	-26.9924	459.026	60.5793	22.5089	33.4211	171.121	71.7903	152.906	72.3777
MPI-ESM_ICE6G	180	68.652	-11.9891	1161.38	1.6086	-22.3115	2.19895	-26.1026	465.621	57.7327	23.6421	30.4999	164.083	75.1559	142.367	76.3543
MPI-ESM_ICE6G	-161.25	68.652	-7.01788	1151.27	4.68971	-17.9989	6.4573	-22.1047	341.089	48.0305	14.745	36.5546	131.149	48.5875	124.301	55.7666
MPI-ESM_ICE6G	-157.5	68.652	-7.13633	1178.64	6.95957	-17.9567	6.95957	-22.3171	372.187	53.0551	15.898	42.15	148.949	50.2604	148.949	57.9454
MPI-ESM_ICE6G	-153.75	68.652	-7.31784	1199.19	7.25888	-17.9568	7.25888	-22.5078	459.53	72.8355	18.8227	49.8725	202.508	58.444	202.508	65.0477
MPI-ESM_ICE6G	-150	68.652	-7.45981	1208.34	7.36807	-17.9507	7.36807	-22.6006	476.626	80.0348	19.5109	53.1704	218.832	60.7687	218.832	66.1366
MPI-ESM_ICE6G	-146.25	68.652	-7.48825	1213.42	7.45503	-17.8986	7.45503	-22.5943	431.31	72.3558	17.755	52.3415	197.1	56.5934	197.1	62.7636
MPI-ESM_ICE6G	-142.5	68.652	-7.30475	1228.91	7.84661	-17.7513	7.84661	-22.5086	458.678	79.9661	17.7829	58.2813	220.598	57.0383	220.598	62.4006
MPI-ESM_ICE6G	-138.75	68.652	-6.94798	1258.38	8.5891	-17.5325	8.5891	-22.394	548.415	104.249	20.4651	67.7407	282.03	62.0098	282.03	65.47
MPI-ESM_ICE6G	-135	68.652	-6.58198	1290.9	9.37813	-17.2966	9.37813	-22.2988	548.703	103.068	20.4829	66.9534	277.8	61.8119	277.8	64.5055
MPI-ESM_ICE6G	-131.25	68.652	-6.07269	1308.49	10.1766	-21.8559	10.1766	-21.8559	543.159	95.2393	20.1886	61.489	262.174	65.1639	262.174	65.1639
MPI-ESM_ICE6G	-127.5	68.652	-5.89588	1343.18	10.8249	-21.933	10.8249	-21.933	528.194	85.1105	20.2727	54.8247	240.359	66.2178	240.359	66.2178
MPI-ESM_ICE6G	-123.75	68.652	-5.93743	1378.37	11.2661	-22.2528	11.2661	-24.3007	506.349	75.7966	20.7529	48.1884	216.169	68.0106	216.169	71.784
MPI-ESM_ICE6G	-120	68.652	-6.18173	1407.18	11.4086	-22.7578	11.4086	-24.972	475.777	67.0128	21.2565	41.8087	188.484	68.0569	188.484	70.8129
MPI-ESM_ICE6G	-116.25	68.652	-6.53066	1432.09	8.27673	-23.387	11.3646	-25.727	455.66	63.3048	21.2391	38.6694	171.45	66.5129	170.479	67.7148
MPI-ESM_ICE6G	-112.5	68.652	-6.85837	1449.67	8.18364	-23.9698	11.2209	-26.3901	423.403	57.5615	19.835	36.693	156.749	62.2768	151.9	62.2492
MPI-ESM_ICE6G	-108.75	68.652	-7.10445	1458.9	8.07139	-24.4536	11.0292	-26.8744	385.274	50.6223	17.8791	35.816	139.366	55.9596	134.696	55.1658
MPI-ESM_ICE6G	-105	68.652	-7.20741	1457.28	7.97941	-24.7122	10.8338	-27.0634	345.966	45.6734	15.4249	34.6037	123.506	50.1548	114.059	49.256
MPI-ESM_ICE6G	-97.5	68.652	-7.46922	1435.53	7.52612	-25.0989	10.1624	-25.0989	318.308	44.8047	12.9047	39.4015	122.426	42.7324	115.622	42.7324
MPI-ESM_ICE6G	-93.75	68.652	-7.81571	1414.13	7.00781	-25.2988	9.52949	-25.2988	321.663	44.9891	12.9058	41.8237	126.849	42.1868	123.037	42.1868
MPI-ESM_ICE6G	-90	68.652	-8.29533	1390.41	6.32766	-25.6271	8.75892	-25.6271	340.985	47.8778	13.6308	42.3925	135.527	44.4863	130.797	44.4863
MPI-ESM_ICE6G	-82.5	68.652	-8.99147	1356.77	7.69686	-26.0661	7.69686	-26.0661	407.115	59.143	17.0745	44.3907	164.837	55.1076	164.837	55.1076
MPI-ESM_ICE6G	-75	68.652	-7.60687	1335.66	8.8018	-25.7584	8.8018	-24.3812	438.025	69.7532	20.2842	44.9629	181.294	61.7515	181.294	64.6237
MPI-ESM_ICE6G	-71.25	68.652	-6.06173	1308.27	9.98203	-23.8235	9.98203	-22.3896	366.508	58.7448	16.3661	43.633	149.554	51.4243	149.554	54.9802
MPI-ESM_ICE6G	-67.5	68.652	-4.09733	1225.07	10.9698	-20.7495	10.9698	-19.3438	276.815	45.958	11.8097	45.5508	117.314	36.8889	117.314	40.7449
MPI-ESM_ICE6G	-52.5	68.652	-9.62225	897.413	2.292	-20.3179	2.292	-20.3179	473.282	79.5289	20.53	46.8507	202.542	65.5983	202.542	65.5983
MPI-ESM_ICE6G	-48.75	68.652	-13.6148	744.013	-3.32028	-22.0056	-3.32028	-22.0056	478.962	66.9121	26.3013	31.7679	174.171	82.8146	174.171	82.8146
MPI-ESM_ICE6G	-45	68.652	-16.173	744.659	-7.53693	-24.4415	-5.8678	-24.4415	550.42	68.5298	33.9037	25.3073	187.678	108.67	184.715	108.67
MPI-ESM_ICE6G	-41.25	68.652	-17.5976	762.109	-8.6505	-19.325	-7.10869	-26.0578	611.186	68.4873	36.8489	19.5499	196.818	123.969	178.032	139.663
MPI-ESM_ICE6G	-37.5	68.652	-17.5607	780.459	-12.8814	-14.3539	-6.81654	-26.0694	676.652	82.058	38.8429	20.4875	215.325	128.992	173.787	171.356
MPI-ESM_ICE6G	-33.75	68.652	-15.1759	760.909	-10.355	-12.3334	-4.71918	-23.4456	808.558	100.037	47.1699	22.1334	256.625	147.188	188.791	220.32
MPI-ESM_ICE6G	15	64.9419	1.60905	740.208	11.1533	-3.99543	11.1533	-7.26814	784.193	102.722	42.9541	30.7609	283.173	135.561	283.173	141.962
MPI-ESM_ICE6G	18.75	64.9419	0.49256	830.43	11.1988	-8.49689	11.1988	-9.49424	777.114	105.286	43.878	31.0295	279.032	134.31	279.032	136.401
MPI-ESM_ICE6G	22.5	64.9419	-0.396078	895.426	11.1486	-10.0879	11.1486	-11.2272	793.262	111.089	42.588	34.0556	294.273	130.067	294.273	127.907
MPI-ESM_ICE6G	26.25	64.9419	-0.973769	938.202	11.1279	-12.4642	11.1279	-12.4642	784.782	107.169	40.9894	34.1784	291.306	123.241	291.306	123.241
MPI-ESM_ICE6G	30	64.9419	-1.34116	959.494	11.0401	-13.2693	11.0401	-13.2693	767.896	102.388	38.9803	34.4773	286.175	117.679	286.175	117.679
MPI-ESM_ICE6G	33.75	64.9419	-1.59799	969.245	10.945	-13.8053	10.945	-13.8053	757.644	97.4069	37.8756	34.0744	279.046	114.987	279.046	114.987
MPI-ESM_ICE6G	41.25	64.9419	-2.2564	999.76	10.789	-15.073	10.789	-15.073	751.443	106.885	33.4274	38.9897	290.737	103.268	290.737	103.268
MPI-ESM_ICE6G	45	64.9419	-2.78839	1030.11	10.7216	-16.0283	10.7216	-16.0283	646.348	84.0867	29.0648	34.5417	233.512	91.1034	233.512	91.1034
MPI-ESM_ICE6G	48.75	64.9419	-3.38732	1069.1	9.15775	-17.1511	10.6881	-17.1511	640.411	82.1001	28.1562	34.6258	230.221	87.9984	225.865	87.9984
MPI-ESM_ICE6G	52.5	64.9419	-4.07629	1108.31	8.91361	-18.3507	10.5362	-18.3507	623.105	77.5817	27.2927	34.3835	220.392	84.9403	216.47	84.9403
MPI-ESM_ICE6G	56.25	64.9419	-4.7357	1145.56	8.63631	-19.5195	10.3563	-19.5195	613.726	74.4963	26.3872	35.5538	220.282	81.9029	216.917	81.9029
MPI-ESM_ICE6G	60	64.9419	-5.39318	1172.22	8.27564	-20.6182	9.94582	-20.6182	616.199	78.3879	25.2455	38.9985	230.281	78.2548	228.299	78.2548
MPI-ESM_ICE6G	63.75	64.9419	-5.83516	1196.19	8.14628	-21.4049	9.75058	-21.4049	613.283	84.3075	24.1666	41.2586	234.836	75.3358	234.072	75.3358
MPI-ESM_ICE6G	67.5	64.9419	-6.07197	1218.13	8.25655	-21.8974	9.78347	-21.8974	596.85	84.7665	23.0028	41.6161	233.007	72.4879	227.144	72.4879
MPI-ESM_ICE6G	71.25	64.9419	-6.14323	1238.37	8.55343	-22.1125	10.0186	-22.1125	567.851	73.8468	22.7032	37.6624	212.285	72.0433	206.052	72.0433
MPI-ESM_ICE6G	75	64.9419	-6.31192	1244.16	8.57879	-22.2224	9.95754	-22.2224	557.873	72.3274	22.3541	35.7941	202.517	71.5977	197.613	71.5977
MPI-ESM_ICE6G	78.75	64.9419	-6.66656	1250.85	8.38598	-22.519	9.73276	-22.519	566.739	70.1412	22.7312	35.5178	202.796	72.7908	201.304	72.7908
MPI-ESM_ICE6G	82.5	64.9419	-7.26899	1264.37	9.35049	-23.1515	9.35049	-23.1515	589.945	77.8995	23.1333	38.8734	219.14	73.2305	219.14	73.2305
MPI-ESM_ICE6G	86.25	64.9419	-8.10652	1291.63	8.88255	-24.2236	8.88255	-24.2236	601.605	85.9799	22.9717	43.3637	237.88	72.42	237.88	72.42
MPI-ESM_ICE6G	90	64.9419	-8.98814	1321.18	8.37156	-25.4066	8.37156	-25.4066	587.027	89.0287	22.4097	46.4658	241.98	70.1943	241.98	70.1943
MPI-ESM_ICE6G	93.75	64.9419	-9.80001	1348.98	7.92334	-26.4866	7.92334	-26.4866	546.764	84.6383	20.2149	48.7999	231.219	63.1772	231.219	63.1772
MPI-ESM_ICE6G	97.5	64.9419	-10.467	1378.23	7.62493	-27.4559	7.62493	-27.4559	494.391	76.7051	17.4361	51.3616	214.085	54.0348	214.085	54.0348
MPI-ESM_ICE6G	101.25	64.9419	-10.914	1405.56	7.55086	-25.7313	7.55086	-28.1631	440.276	68.4747	14.7968	54.0943	195.577	48.8578	195.577	45.5157
MPI-ESM_ICE6G	105	64.9419	-11.1139	1432.29	7.74777	-28.6364	7.74777	-28.6364	398.796	63.6761	12.4451	57.9108	183.487	37.8956	183.487	37.8956
MPI-ESM_ICE6G	108.75	64.9419	-11.0893	1461.61	8.20709	-28.9229	8.20709	-28.9229	367.721	61.4747	10.8551	62.6937	178.07	32.6188	178.07	32.6188
MPI-ESM_ICE6G	112.5	64.9419	-10.8757	1486.03	8.81842	-26.6047	8.81842	-28.9115	347.148	61.3255	9.27105	66.5513	175.301	31.5183	175.301	30.0171
MPI-ESM_ICE6G	116.25	64.9419	-10.6281	1510.34	9.44205	-26.6007	9.44205	-28.9136	343.995	66.0055	8.94431	69.1751	178.335	30.5397	178.335	29.8139
MPI-ESM_ICE6G	120	64.9419	-10.6801	1542	9.79548	-26.9324	9.79548	-29.3261	345.014	67.0264	9.15673	69.467	179.822	30.7685	179.822	30.7936
MPI-ESM_ICE6G	123.75	64.9419	-11.2362	1578	9.60374	-27.7848	9.60374	-30.3203	351.857	63.3284	9.98447	67.7105	180.924	32.0009	180.924	32.8349
MPI-ESM_ICE6G	127.5	64.9419	-12.1153	1593.08	8.83095	-28.6013	8.83095	-31.2817	359.837	62.6507	10.4432	66.0074	180.953	32.7	180.953	33.5264
MPI-ESM_ICE6G	131.25	64.9419	-13.2101	1589.37	7.64042	-29.45	7.64042	-32.1765	360.241	65.3452	10.1023	68.575	183.879	31.8062	183.879	31.9759
MPI-ESM_ICE6G	135	64.9419	-14.1929	1566.76	6.33972	-30.0641	6.33972	-32.7766	369.291	72.7588	9.67579	74.4496	196.756	31.1771	196.756	31.1893
MPI-ESM_ICE6G	138.75	64.9419	-14.7129	1530.57	5.34864	-30.1979	5.34864	-32.8292	394.525	77.931	11.5005	72.1468	205.249	37.3163	205.249	37.3422
MPI-ESM_ICE6G	142.5	64.9419	-14.6421	1486.7	2.458	-29.7483	4.85217	-32.2391	453.256	83.9907	16.3061	63.1861	219.458	52.2509	218.076	52.6752
MPI-ESM_ICE6G	146.25	64.9419	-14.05	1448.08	2.85628	-28.8706	4.97503	-31.1842	518.363	87.5948	21.7764	54.0829	236.933	69.8607	227.617	70.2211
MPI-ESM_ICE6G	150	64.9419	-13.1801	1422.45	3.57074	-27.8655	5.5529	-30.021	531.514	84.4338	24.8002	47.8363	231.998	78.8345	219.117	80.3701
MPI-ESM_ICE6G	153.75	64.9419	-12.3364	1413.06	4.349	-22.0093	6.36135	-29.0501	479.739	72.9039	24.3139	42.9845	202.471	76.1364	184.809	79.0555
MPI-ESM_ICE6G	157.5	64.9419	-11.7815	1416.04	4.95361	-21.5933	7.0694	-28.4872	423.562	63.4481	22.2102	40.2172	174.763	68.0724	155.423	73.5516
MPI-ESM_ICE6G	161.25	64.9419	-11.6371	1411.98	5.09239	-21.5308	7.22326	-28.25	404.747	61.7583	21.069	40.2157	167.103	65.126	146.609	71.5969
MPI-ESM_ICE6G	165	64.9419	-11.7308	1390.53	4.85292	-21.6525	6.83472	-28.1196	434.507	66.1051	22.8207	39.6389	177.694	70.4078	157.971	76.3021
MPI-ESM_ICE6G	168.75	64.9419	-11.8005	1342.54	4.35708	-21.7302	5.98651	-27.8268	501.904	72.8099	27.2392	37.0875	199.268	82.0529	179.134	89.1463
MPI-ESM_ICE6G	172.5	64.9419	-11.5643	1272.44	3.91544	-21.5065	5.0292	-27.0646	586.256	79.375	32.3036	31.7999	219.307	99.4268	195.889	106.642
MPI-ESM_ICE6G	176.25	64.9419	-10.8401	1181.99	3.62636	-24.544	4.16964	-24.544	647.17	80.1453	36.4153	26.076	224.575	115.606	199.436	115.606
MPI-ESM_ICE6G	180	64.9419	-9.48511	1086.91	3.68459	-22.8309	3.77419	-22.8309	652.863	75.2986	37.3593	22.8373	213.969	119.414	187.46	119.414
MPI-ESM_ICE6G	-176.25	64.9419	-7.85032	1013.97	0.613255	-17.794	4.08501	-20.955	581.708	67.9801	33.7806	25.207	186.776	107.965	186.059	109.068
MPI-ESM_ICE6G	-161.25	64.9419	-5.18618	1078.28	6.02565	-14.785	7.78685	-18.9892	579.015	80.5139	25.1489	40.5756	227.671	78.7323	213.701	90.5528
MPI-ESM_ICE6G	-157.5	64.9419	-5.82027	1125.46	5.91374	-7.59776	8.14879	-19.7373	661.992	95.7393	28.566	42.4435	268.054	88.9475	242.446	104.056
MPI-ESM_ICE6G	-153.75	64.9419	-6.44773	1142.53	5.60578	-7.98978	8.01749	-20.2056	724.931	103.328	31.7364	41.1266	287.692	98.8222	263.201	115.824
MPI-ESM_ICE6G	-150	64.9419	-6.86145	1135.21	5.25767	-8.28404	7.65624	-22.1312	741.286	100.619	32.3515	38.7744	285.317	104.573	263.758	135.788
MPI-ESM_ICE6G	-146.25	64.9419	-7.02973	1115.43	4.9469	-8.42483	7.27665	-21.955	711.044	94.621	33.1292	37.8637	269.868	103.167	256.913	130.21
MPI-ESM_ICE6G	-142.5	64.9419	-6.99863	1099.35	7.07575	-15.2548	7.07575	-21.6627	642.984	86.9243	29.802	39.4911	248.744	94.1311	248.744	115.047
MPI-ESM_ICE6G	-138.75	64.9419	-6.86928	1102.11	7.17361	-15.2045	7.17361	-21.5182	569.455	89.4436	23.993	47.6872	246.611	78.6309	246.611	95.698
MPI-ESM_ICE6G	-135	64.9419	-6.57149	1131.92	7.75948	-15.132	7.75948	-21.5314	606.004	120.177	22.9166	67.9802	309.808	71.2592	309.808	81.9804
MPI-ESM_ICE6G	-131.25	64.9419	-6.15133	1170.43	8.57064	-14.9233	8.57064	-21.5283	600.339	130.205	21.1554	77.1094	324.128	66.4697	324.128	72.6463
MPI-ESM_ICE6G	-127.5	64.9419	-5.60804	1211.56	9.52514	-14.5501	9.52514	-21.4891	628.987	132.972	20.5299	79.2643	344.277	67.1685	344.277	70.1555
MPI-ESM_ICE6G	-123.75	64.9419	-4.80486	1235.43	10.5339	-21.0417	10.5339	-21.0417	648.997	130.218	21.7295	72.6869	342.055	73.0549	342.055	73.0549
MPI-ESM_ICE6G	-120	64.9419	-4.23673	1286.9	11.6357	-21.2033	11.6357	-21.2033	634.132	118.982	23.6355	63.3792	314.465	79.1945	314.465	79.1945
MPI-ESM_ICE6G	-116.25	64.9419	-4.31766	1321.61	11.8613	-21.9258	11.8613	-21.9258	671.493	114.537	25.5415	58.1174	315.92	84.9782	315.92	84.9782
MPI-ESM_ICE6G	-112.5	64.9419	-4.58531	1376.96	12.2074	-23.0996	12.2074	-23.0996	644.993	98.9009	26.6505	49.8798	280.35	86.997	280.35	86.997
MPI-ESM_ICE6G	-108.75	64.9419	-4.997	1428.81	12.4208	-24.3537	12.4208	-24.3537	571.427	81.6377	26.0247	41.275	224.059	82.5669	224.059	82.5669
MPI-ESM_ICE6G	-105	64.9419	-5.29177	1458.37	9.70538	-25.1858	12.4965	-25.1858	504.231	71.0634	22.8106	38.8137	188.892	70.9945	185.88	70.9945
MPI-ESM_ICE6G	-101.25	64.9419	-5.26256	1453.62	9.80767	-25.1615	12.4794	-25.1615	442.422	60.557	18.8146	38.7064	163.842	58.9425	160.294	58.9425
MPI-ESM_ICE6G	-97.5	64.9419	-4.94013	1412.62	12.2915	-24.2828	12.2915	-24.2828	397.859	52.8418	16.1482	41.9782	154.739	49.3835	154.739	49.3835
MPI-ESM_ICE6G	-93.75	64.9419	-4.57527	1346.9	11.8388	-22.9685	11.8388	-21.1093	367.516	52.6431	13.8305	46.4513	153.262	42.8722	153.262	45.7948
MPI-ESM_ICE6G	-90	64.9419	-4.87165	1297.34	10.8662	-21.1454	10.8662	-21.1454	361.742	58.1662	12.4024	52.0993	159.576	41.3803	159.576	41.3803
MPI-ESM_ICE6G	-86.25	64.9419	-5.72974	1262.66	9.51402	-21.7998	9.51402	-21.7998	361.47	52.6785	12.5206	46.9299	151.048	43.0238	151.048	43.0238
MPI-ESM_ICE6G	-71.25	64.9419	-6.06144	1195.87	8.24277	-22.5007	8.24277	-21.4638	441.797	66.1206	20.5405	45.0009	181.85	61.7027	181.85	63.3168
MPI-ESM_ICE6G	-67.5	64.9419	-4.24137	1126.62	9.12081	-19.8459	9.12081	-18.7874	406.756	63.8652	16.449	48.0445	174.879	51.7942	174.879	56.157
MPI-ESM_ICE6G	-48.75	64.9419	-7.50917	547.992	-0.312252	-13.9392	-0.312252	-13.9392	775.01	108.527	40.7024	37.2877	298.636	134.023	298.636	134.023
MPI-ESM_ICE6G	-45	64.9419	-8.44963	551.61	-1.91954	-14.7691	-1.07307	-14.7691	1062.49	127.61	64.4196	27.1816	367.619	206.966	363.361	206.966
MPI-ESM_ICE6G	-41.25	64.9419	-8.22035	550.93	-1.66203	-9.51541	-0.8717	-14.5057	1300.98	138.527	86.3874	15.887	396.975	277.061	370.427	297.736
MPI-ESM_ICE6G	-18.75	64.9419	5.63098	417.298	8.97996	6.7586	11.1125	1.06954	498.662	50.2259	33.2474	10.825	140.808	109.963	127.671	130.882
MPI-ESM_ICE6G	7.5	61.2316	5.62757	479.413	11.2175	1.61796	11.7497	0.287724	1031.21	108.615	60.0628	18.9648	309.706	192.965	309.628	215.127
MPI-ESM_ICE6G	11.25	61.2316	4.30733	556.229	10.584	3.08134	11.3873	-1.92572	1056.21	112.687	61.3829	20.1693	325.556	198.609	318.981	219.002
MPI-ESM_ICE6G	15	61.2316	3.07738	647.523	10.2415	-2.20556	11.3042	-4.19946	1083.33	124.618	62.5838	21.9821	345.109	203.433	339.398	214.346
MPI-ESM_ICE6G	22.5	61.2316	1.7289	831.257	12.2796	-7.45331	12.2796	-8.37011	990.599	133.46	58.2807	29.047	348.922	177.125	348.922	178.985
MPI-ESM_ICE6G	26.25	61.2316	1.42742	902.681	12.8249	-9.74542	12.8249	-9.74542	965.965	141.417	51.3722	35.9686	369.086	155.153	369.086	155.153
MPI-ESM_ICE6G	30	61.2316	1.14662	954.783	13.1605	-10.8943	13.1605	-10.8943	906.976	133.698	44.9914	37.6301	349.544	136.918	349.544	136.918
MPI-ESM_ICE6G	33.75	61.2316	0.730391	985.882	13.146	-11.8685	13.146	-11.8685	880.966	130.465	42.3261	38.8119	341.19	129.4	341.19	129.4
MPI-ESM_ICE6G	37.5	61.2316	0.215105	1009.55	12.9898	-12.8075	12.9898	-12.8075	864.642	124.114	40.875	37.4777	328.291	126.955	328.291	126.955
MPI-ESM_ICE6G	41.25	61.2316	-0.335577	1034.53	12.8466	-13.7294	12.8466	-13.7294	880.841	124.803	39.4317	37.1361	329.046	124.775	329.046	124.775
MPI-ESM_ICE6G	45	61.2316	-0.915302	1053.84	12.6207	-14.5832	12.6207	-14.5832	772.775	98.5533	35.7815	32.1055	269.829	114.162	269.829	114.162
MPI-ESM_ICE6G	48.75	61.2316	-1.48081	1064.82	12.2501	-15.3161	12.2501	-15.3161	794.556	96.1888	35.5432	32.4217	272.435	113.257	272.435	113.257
MPI-ESM_ICE6G	52.5	61.2316	-2.03203	1071.92	11.8468	-15.9684	11.8468	-15.9684	780.863	96.565	34.8328	32.6451	266.5	109.972	266.5	109.972
MPI-ESM_ICE6G	56.25	61.2316	-2.62933	1066.13	11.1778	-16.5378	11.1778	-16.5378	757.744	96.1479	33.1689	34.2032	264.553	103.933	264.553	103.933
MPI-ESM_ICE6G	60	61.2316	-3.18823	1065.12	10.604	-17.133	10.604	-17.133	757.62	98.7415	31.3894	38.4783	282.487	97.9487	282.487	97.9487
MPI-ESM_ICE6G	63.75	61.2316	-3.55814	1083.42	10.486	-17.7556	10.486	-17.7556	742.057	106.858	29.716	42.063	291.38	92.7082	291.38	92.7082
MPI-ESM_ICE6G	67.5	61.2316	-3.67663	1118.13	10.8581	-18.2836	10.8581	-18.2836	704.171	103.828	28.5672	40.8653	275.759	89.8141	275.759	89.8141
MPI-ESM_ICE6G	71.25	61.2316	-3.83101	1142.65	11.0296	-18.7265	11.0296	-18.7265	672.106	97.0374	27.7285	38.7372	256.307	87.5904	256.307	87.5904
MPI-ESM_ICE6G	75	61.2316	-3.89636	1173.1	11.4234	-19.0755	11.4234	-19.0755	624.619	87.1387	27.7975	33.0502	222.552	87.799	222.552	87.799
MPI-ESM_ICE6G	78.75	61.2316	-4.17068	1192.41	11.4582	-19.5047	11.4582	-19.5047	609.826	76.1016	28.1516	28.239	205.209	89.0337	205.209	89.0337
MPI-ESM_ICE6G	82.5	61.2316	-4.71431	1209.28	11.1834	-20.1686	11.1834	-20.1686	637.142	77.6259	28.8971	28.8433	216.704	91.3182	216.704	91.3182
MPI-ESM_ICE6G	86.25	61.2316	-5.46263	1226.25	10.674	-21.0541	10.674	-21.0541	675.909	89.026	28.2052	34.4309	246.374	89.2888	246.374	89.2888
MPI-ESM_ICE6G	90	61.2316	-6.18289	1250.59	10.2692	-22.0053	10.2692	-22.0053	668.675	99.4142	24.4884	42.9568	270.086	78.1477	270.086	78.1477
MPI-ESM_ICE6G	93.75	61.2316	-6.75741	1276.02	10.0118	-22.8314	10.0118	-22.8314	610.804	98.5711	19.1988	51.1297	268.057	61.285	268.057	61.285
MPI-ESM_ICE6G	97.5	61.2316	-7.2136	1303.86	9.91336	-23.5583	9.91336	-23.5583	541.217	94.3369	15.3817	57.4635	251.961	48.7125	251.961	48.7125
MPI-ESM_ICE6G	101.25	61.2316	-7.72624	1332.97	9.79754	-24.3529	9.79754	-24.3529	485.277	83.5979	13.438	58.4271	226.879	42.3085	226.879	42.3085
MPI-ESM_ICE6G	105	61.2316	-8.41303	1368.47	9.61623	-25.405	9.61623	-25.405	451.055	73.5517	12.7377	56.8173	206.985	40.0494	206.985	40.0494
MPI-ESM_ICE6G	108.75	61.2316	-9.16699	1400.51	9.38	-26.4129	9.38	-26.4129	439.193	69.3004	13.3931	55.7901	198.764	41.026	198.764	41.026
MPI-ESM_ICE6G	112.5	61.2316	-9.85821	1432.89	9.19745	-27.3832	9.19745	-27.3832	442.016	74.2389	13.6652	59.6966	209.041	41.3091	209.041	41.3091
MPI-ESM_ICE6G	116.25	61.2316	-10.3788	1471.94	9.20882	-25.8231	9.20882	-28.3406	453.314	82.0233	13.6024	65.135	226.395	43.1881	226.395	40.8142
MPI-ESM_ICE6G	120	61.2316	-10.7263	1506.45	9.25367	-26.482	9.25367	-29.1111	464.736	88.1862	12.905	70.4246	243.581	41.9892	243.581	40.4782
MPI-ESM_ICE6G	123.75	61.2316	-11.0335	1527.15	9.08036	-26.9382	9.08036	-29.6712	452.068	83.9331	12.1356	71.4707	237.099	39.1077	237.099	37.9815
MPI-ESM_ICE6G	127.5	61.2316	-11.4529	1524.52	8.44546	-27.1981	8.44546	-29.9936	434.224	81.9284	10.9665	72.8214	227.009	35.5473	227.009	34.4504
MPI-ESM_ICE6G	131.25	61.2316	-11.9501	1490.95	7.36832	-29.9517	7.36832	-29.9517	426.595	87.2189	9.99137	76.9732	227.5	30.7541	227.5	30.7541
MPI-ESM_ICE6G	135	61.2316	-12.2731	1426.54	6.10113	-29.4293	6.10113	-29.4293	457.39	96.6385	10.7908	80.7823	251.322	33.5355	251.322	33.5355
MPI-ESM_ICE6G	138.75	61.2316	-12.1227	1341.06	5.07451	-28.0401	5.07451	-28.2878	508.479	105.341	12.9457	77.3917	271.85	44.7758	271.85	45.1017
MPI-ESM_ICE6G	142.5	61.2316	-11.526	1257.67	3.54671	-26.3792	4.51794	-26.8163	588.694	114.604	17.0038	70.6045	299.499	62.801	296.487	64.6062
MPI-ESM_ICE6G	146.25	61.2316	-10.6899	1202.93	3.93233	-24.851	4.59554	-25.4051	625.034	113.115	21.2496	62.106	303.858	78.7647	288.879	81.3662
MPI-ESM_ICE6G	150	61.2316	-9.88354	1176.47	4.49728	-23.7675	5.07462	-24.2842	630.791	103.323	29.256	51.0291	285.424	94.4484	259.184	96.4226
MPI-ESM_ICE6G	157.5	61.2316	-9.2265	1179.63	5.26256	-23.4316	5.99423	-23.4316	566.826	89.7638	30.5693	43.089	240.94	98.163	212.782	98.163
MPI-ESM_ICE6G	161.25	61.2316	-8.90681	1158.05	5.37504	-17.3224	6.11591	-22.7942	589.776	87.0849	33.9528	36.6322	235.445	106.883	205.831	107.684
MPI-ESM_ICE6G	165	61.2316	-8.61081	1121.95	5.38018	-17.0399	5.98655	-21.9893	633.263	90.6532	37.7888	33.5092	244.496	118.588	215.437	120.335
MPI-ESM_ICE6G	168.75	61.2316	-8.01468	1065.67	5.3945	-16.4666	5.86094	-20.6736	739.615	105.283	44.1377	33.493	284.376	136.364	258.9	138.351
MPI-ESM_ICE6G	172.5	61.2316	-7.23407	982.46	5.2409	-15.6695	5.40763	-18.3235	789.078	101.319	49.1417	26.5693	280.376	149.207	248.743	154.588
MPI-ESM_ICE6G	-161.25	61.2316	-3.23146	879.804	6.37803	-11.388	7.24099	-14.5905	856.867	113.303	44.8092	31.0659	300.359	139.421	258.76	148.99
MPI-ESM_ICE6G	-157.5	61.2316	-3.77074	947.48	2.89682	-5.82874	7.9433	-15.5271	1030.22	134.702	55.6547	30.8653	358.703	170.904	298.196	185.173
MPI-ESM_ICE6G	-153.75	61.2316	-3.98708	972.267	2.73462	-5.97972	8.30603	-15.6864	1247.7	158.529	68.8431	30.0164	432.494	211.896	349.872	227.713
MPI-ESM_ICE6G	-150	61.2316	-3.98436	949.91	2.71944	-5.97351	8.10577	-16.6521	1331.39	163.987	74.8438	29.1839	454.294	232.713	336.619	283.704
MPI-ESM_ICE6G	-146.25	61.2316	-3.98731	904.801	-2.58574	-0.326432	7.50508	-16.0182	1392.99	170.894	75.461	30.0201	482.631	239.182	345.811	300.866
MPI-ESM_ICE6G	-142.5	61.2316	-4.25139	875.422	-2.78542	-6.22428	6.87227	-15.8688	1384.74	170.837	68.9413	30.5924	479.518	226.138	358.063	301.577
MPI-ESM_ICE6G	-138.75	61.2316	-4.87779	881.106	1.46305	-6.78402	6.37906	-16.5169	1286.07	156.68	59.6428	30.2486	440.163	200.252	360.86	279.974
MPI-ESM_ICE6G	-135	61.2316	-5.51608	922.368	0.761418	-7.31994	6.38068	-17.576	1091.1	126.982	52.1331	29.5467	359.646	169.523	339.483	232.308
MPI-ESM_ICE6G	-131.25	61.2316	-5.72893	981.965	6.95636	-13.02	6.95636	-18.478	843.71	105.778	42.5536	31.2036	296.08	138.403	296.08	171.067
MPI-ESM_ICE6G	-127.5	61.2316	-5.29132	1041.97	7.93873	-12.9331	7.93873	-18.8022	646.771	109.961	31.3051	49.9877	281.866	95.1074	281.866	108.568
MPI-ESM_ICE6G	-123.75	61.2316	-4.18121	1086.87	7.83257	-18.3446	9.30936	-18.3446	611.318	125.596	21.9263	73.4784	321.606	76.6409	316.226	76.6409
MPI-ESM_ICE6G	-120	61.2316	-2.45278	1096.33	9.6937	-13.4684	10.8818	-16.8878	648.024	139.903	19.6344	81.3002	358.055	64.1528	354.884	68.9302
MPI-ESM_ICE6G	-116.25	61.2316	-1.44637	1137.42	12.1423	-16.6147	12.1423	-16.6147	675.275	140.722	21.4552	78.495	365.892	71.3027	365.892	71.3027
MPI-ESM_ICE6G	-112.5	61.2316	-1.29387	1211.54	13.0359	-17.587	13.0359	-17.587	632.478	116.456	25.1946	62.5322	309.413	80.5244	309.413	80.5244
MPI-ESM_ICE6G	-108.75	61.2316	-2.04115	1302.43	13.4296	-16.6997	13.4296	-19.6048	573.78	85.5135	28.2517	41.9338	232.661	89.7017	232.661	91.6024
MPI-ESM_ICE6G	-105	61.2316	-3.20321	1362.28	13.1212	-21.648	13.1212	-21.648	569.957	77.1646	29.3446	36.2784	214.348	93.2751	214.348	93.2751
MPI-ESM_ICE6G	-101.25	61.2316	-4.0194	1367.64	9.97665	-22.6238	12.4848	-22.6238	563.255	78.1771	26.9771	40.1757	219.01	83.3876	216.295	83.3876
MPI-ESM_ICE6G	-97.5	61.2316	-4.02824	1316.27	11.8931	-21.9555	11.8931	-21.9555	536.333	74.9182	22.884	46.6275	218.823	70.1967	218.823	70.1967
MPI-ESM_ICE6G	-75	61.2316	-4.33183	1134.56	8.18905	-18.9121	9.35283	-18.9121	424.693	54.7994	19.7215	38.971	160.413	63.0306	153.876	63.0306
MPI-ESM_ICE6G	-71.25	61.2316	-4.53327	1141.53	7.93296	-19.5132	9.30142	-19.0915	454.784	60.7152	21.1781	40.9465	176.016	64.0008	172.053	67.2457
MPI-ESM_ICE6G	-45	61.2316	-2.04276	303.692	1.44719	-6.00561	1.51537	-6.00561	1159.57	131.689	74.7083	23.1708	382.911	230.442	379.834	230.442
MPI-ESM_ICE6G	15	57.521	5.46682	578.052	12.7662	4.28903	12.7662	-1.10484	1081.83	118.514	69.9236	14.9843	317.786	224.574	317.786	240.985
MPI-ESM_ICE6G	26.25	57.521	4.52803	774.219	14.1296	-4.12887	14.1296	-5.33423	912.465	112.579	58.1888	22.0905	297.776	176.363	297.776	174.961
MPI-ESM_ICE6G	30	57.521	3.70222	827.148	13.8463	-7.04364	13.8463	-7.04364	942.24	107.988	53.8484	24.3629	307.467	164.701	307.467	164.701
MPI-ESM_ICE6G	33.75	57.521	2.65026	866.474	13.1988	-8.7805	13.1988	-8.7805	818.206	90.6678	47.3416	22.5962	251.39	145.04	251.39	145.04
MPI-ESM_ICE6G	37.5	57.521	1.84594	904.901	12.8735	-8.2235	12.8735	-10.1837	841.196	92.242	47.2509	23.4232	260.181	151.902	260.181	146.61
MPI-ESM_ICE6G	41.25	57.521	1.38813	944.935	11.5752	-11.1952	12.9782	-11.1952	832.892	94.0443	45.4881	23.074	260.353	144.082	257.365	144.082
MPI-ESM_ICE6G	45	57.521	1.11338	981.585	11.6711	-11.9529	13.23	-11.9529	827.644	100.317	44.7345	23.8601	266.552	142.705	256.147	142.705
MPI-ESM_ICE6G	48.75	57.521	0.806441	1002.99	11.5658	-12.5378	13.2373	-12.5378	821.885	105.139	43.8789	25.1622	269.25	140.894	252.399	140.894
MPI-ESM_ICE6G	52.5	57.521	0.310706	1006.35	11.0529	-13.089	12.8233	-13.089	818.968	106.991	42.7213	26.5299	273.944	137	256.138	137
MPI-ESM_ICE6G	56.25	57.521	-0.263352	1001.28	10.3082	-13.5808	12.2452	-13.5808	819.065	106.801	40.8075	28.2031	280.253	130.03	266.675	130.03
MPI-ESM_ICE6G	60	57.521	-0.74579	1007.71	9.75378	-14.0779	11.9256	-14.0779	814.843	107.092	39.0578	31.2777	291.457	123.996	282.171	123.996
MPI-ESM_ICE6G	63.75	57.521	-0.952185	1036.68	9.73754	-14.5739	12.1467	-14.5739	792.928	110.172	37.2768	35.7882	300.165	118.013	294.679	118.013
MPI-ESM_ICE6G	67.5	57.521	-0.879009	1080.25	10.2346	-15.0047	12.788	-15.0047	742.133	110.762	35.5633	39.7184	295.325	112.076	288.741	112.076
MPI-ESM_ICE6G	71.25	57.521	-0.653532	1119.32	10.89	-15.2596	13.496	-15.2596	653.767	98.2665	31.3122	39.5069	260.856	100.014	253.598	100.014
MPI-ESM_ICE6G	75	57.521	-0.430736	1140.17	11.3916	-12.7765	13.9851	-15.2812	567.45	82.807	27.7381	37.298	222.724	97.638	213.956	89.4538
MPI-ESM_ICE6G	78.75	57.521	-0.491426	1136.87	11.4083	-12.6901	13.9391	-15.2356	542.525	74.9685	27.4	33.4352	202.346	95.109	198.899	87.7295
MPI-ESM_ICE6G	82.5	57.521	-1.12872	1116.75	10.6169	-12.9681	13.1681	-15.5117	597.506	77.5889	30.014	30.1892	213.341	103.023	211.024	94.807
MPI-ESM_ICE6G	86.25	57.521	-2.32505	1098.08	9.15088	-13.8262	11.8923	-16.3481	691.241	88.0824	32.8058	29.4438	242.18	114.487	237.569	103.876
MPI-ESM_ICE6G	90	57.521	-3.61737	1105.48	7.8186	-17.6672	10.8088	-17.6672	721.207	100.131	29.6344	35.3222	266.214	94.8591	260.462	94.8591
MPI-ESM_ICE6G	93.75	57.521	-4.66175	1133.51	10.1534	-19.0436	10.1534	-19.0436	668	103.438	21.99	46.1732	271.131	71.4899	271.131	71.4899
MPI-ESM_ICE6G	97.5	57.521	-5.28511	1166.53	9.95492	-20.0535	9.95492	-20.0535	600.426	104.696	15.4272	59.509	277.662	50.8685	277.662	50.8685
MPI-ESM_ICE6G	101.25	57.521	-5.82007	1201.14	9.91673	-20.9343	9.91673	-20.9343	570.325	103.258	13.3806	65.7764	281.815	43.1921	281.815	43.1921
MPI-ESM_ICE6G	105	57.521	-6.82331	1254.37	9.68354	-22.5426	9.68354	-22.5426	569.891	101.417	14.4974	64.499	281.708	46.2403	281.708	46.2403
MPI-ESM_ICE6G	108.75	57.521	-8.14423	1319.21	9.30318	-24.6223	9.30318	-24.6223	553.26	92.2438	16.3831	58.304	259.913	51.3626	259.913	51.3626
MPI-ESM_ICE6G	112.5	57.521	-9.46929	1375.11	8.74468	-26.5923	8.74468	-26.5923	553.458	92.4002	16.2848	60.9407	267.368	50.2065	267.368	50.2065
MPI-ESM_ICE6G	116.25	57.521	-10.3708	1426.75	8.49234	-28.0608	8.49234	-28.0608	547.018	101.694	14.1764	70.6704	287.095	43.5243	287.095	43.5243
MPI-ESM_ICE6G	120	57.521	-10.7207	1457.79	8.46475	-28.7124	8.46475	-28.7124	559.682	112.564	13.1329	78.8769	312.64	39.9683	312.64	39.9683
MPI-ESM_ICE6G	123.75	57.521	-10.6918	1471.53	8.58936	-28.7732	8.58936	-28.7732	560.751	113.654	12.4248	81.1031	315.766	37.3442	315.766	37.3442
MPI-ESM_ICE6G	127.5	57.521	-10.5667	1456.93	8.42197	-28.3957	8.42197	-28.3957	550.948	109.665	11.9434	80.5692	305.039	35.8823	305.039	35.8823
MPI-ESM_ICE6G	131.25	57.521	-10.2884	1401.15	7.85025	-27.4649	7.85025	-27.4649	555.263	112.64	12.7938	78.5984	297.493	38.7684	297.493	38.7684
MPI-ESM_ICE6G	135	57.521	-9.5722	1301.86	7.10381	-25.0572	7.10381	-25.7206	601.156	119.084	16.5817	71.598	301.609	53.6173	301.609	53.9504
MPI-ESM_ICE6G	157.5	57.521	-4.06443	855.359	6.73652	-13.9874	6.73652	-14.4227	675.671	98.1813	36.3311	38.719	272.86	114.911	272.86	118.883
MPI-ESM_ICE6G	-157.5	57.521	0.0454066	676.6	1.83107	-6.42365	8.23655	-8.45371	1248.37	141.881	77.5096	19.2328	390.239	244.193	303.247	247.38
MPI-ESM_ICE6G	-153.75	57.521	0.709194	695.268	2.41857	-5.78916	9.21702	-7.87787	1310.95	139.466	83.8508	18.3712	407.74	261.823	299.05	271.845
MPI-ESM_ICE6G	-135	57.521	-0.5011	701.255	0.945164	1.6634	8.65129	-9.2395	1936.31	266.788	91.7505	35.1901	722.143	297.233	378.455	491.181
MPI-ESM_ICE6G	-131.25	57.521	-2.59217	796.872	-1.47139	0.275201	7.89778	-12.4635	1643.14	223.645	68.6608	35.0687	605.367	240.466	327.284	432.592
MPI-ESM_ICE6G	-127.5	57.521	-3.53197	892.785	-2.88047	-5.43108	8.28874	-14.536	1162	142.584	53.508	25.7726	385.923	195.206	283.761	299.295
MPI-ESM_ICE6G	-123.75	57.521	-3.22059	958.992	9.06314	-10.1945	9.06314	-15.1763	716.6	101.152	36.4393	33.2387	265.325	123.069	265.325	152.729
MPI-ESM_ICE6G	-120	57.521	-1.69759	975.215	9.087	-11.5686	10.35	-14.1315	607.919	127.848	20.3161	73.4514	322.249	70.0369	309.128	80.7291
MPI-ESM_ICE6G	-116.25	57.521	0.0772847	995.02	11.0511	-10.3345	11.9705	-12.9483	620.779	140.583	15.0668	86.8916	359.784	52.7518	346.167	61.4763
MPI-ESM_ICE6G	-112.5	57.521	1.22461	1063.72	12.9079	-10.1161	13.6861	-12.9229	591.648	126.459	17.1269	80.1564	323.322	57.965	321.576	63.9622
MPI-ESM_ICE6G	-108.75	57.521	1.22971	1164.17	14.8055	-11.2908	14.8055	-14.3457	537.999	102.427	23.3062	60.627	259.618	75.1703	259.618	78.5201
MPI-ESM_ICE6G	-105	57.521	0.153048	1249.37	14.8461	-7.37085	14.8461	-16.5571	578.466	102.707	29.2843	51.3936	261.498	89.9886	261.498	93.0388
MPI-ESM_ICE6G	-101.25	57.521	-1.23607	1289.68	14.0624	-18.565	14.0624	-18.565	619.816	110.194	30.4122	51.4494	279.269	95.0279	279.269	95.0279
MPI-ESM_ICE6G	-97.5	57.521	-2.17548	1265.66	12.9204	-19.3107	12.9204	-19.3107	646.317	115.615	25.7092	56.49	300.045	83.6323	300.045	83.6323
MPI-ESM_ICE6G	-93.75	57.521	-2.02608	1193.47	12.1895	-18.1982	12.1895	-18.1982	610.229	104.27	23.801	57.1519	282.168	73.217	282.168	73.217
MPI-ESM_ICE6G	-75	57.521	-1.94113	1085.57	10.1721	-13.016	11.6022	-15.41	565.018	77.5299	25.7867	38.9243	220.745	83.7151	196.557	86.3435
MPI-ESM_ICE6G	-71.25	57.521	-3.0328	1123.81	9.44392	-16.7193	11.2275	-16.7193	650.64	91.2142	29.2065	41.7776	262.554	94.0712	236.499	94.0712
MPI-ESM_ICE6G	-67.5	57.521	-3.16506	1096.53	9.17314	-16.4642	10.7827	-16.4642	735.658	95.2154	35.5302	36.1383	277.936	114.175	267.297	114.175
MPI-ESM_ICE6G	-63.75	57.521	-2.29597	1021.75	9.41518	-14.7449	10.5861	-14.7449	811.199	106.709	42.7109	32.2708	294.381	136.188	290.512	136.188
MPI-ESM_ICE6G	0	53.8103	8.50805	415.318	4.05027	7.22242	13.8623	3.77162	1417.89	136.163	97.2072	11.1589	392.768	301.072	365.296	374.782
MPI-ESM_ICE6G	7.5	53.8103	6.72618	504.195	1.13424	5.49191	13.1458	0.82761	1165.95	116.074	76.0762	13.5048	336.765	241.155	304.294	315.09
MPI-ESM_ICE6G	11.25	53.8103	6.62856	525.996	12.2662	2.45836	13.2823	0.402236	1147.4	120.491	79.719	12.6494	336.408	248.309	336.274	264.238
MPI-ESM_ICE6G	15	53.8103	6.95086	549.228	12.9089	0.875747	13.8687	0.382227	917.059	96.9238	64.1494	15.7879	284.072	198.13	273.361	200.498
MPI-ESM_ICE6G	18.75	53.8103	7.04436	588.984	13.4425	7.08546	14.438	-0.0795044	845.58	83.3593	61.258	11.8698	247.269	189.354	239.956	196.378
MPI-ESM_ICE6G	22.5	53.8103	6.62902	645.882	13.6307	-0.41888	14.7127	-1.31874	913.131	86.2841	67.1354	9.16837	256.738	206.856	254.6	212.285
MPI-ESM_ICE6G	26.25	53.8103	5.67058	707.665	14.442	-2.04904	14.442	-3.26512	913.397	85.088	67.1652	8.06403	249.605	204.913	249.605	208.233
MPI-ESM_ICE6G	30	53.8103	4.56939	771.98	12.6026	-3.8616	14.0027	-5.43633	1005.31	92.6831	71.372	9.43676	273.012	218.94	272.655	214.986
MPI-ESM_ICE6G	33.75	53.8103	3.77116	827.579	9.08683	-7.14979	13.8103	-7.14979	1020.84	93.4348	68.7623	10.374	278.246	210.558	273.714	210.558
MPI-ESM_ICE6G	37.5	53.8103	3.44395	880.42	12.6995	-8.28672	14.1233	-8.28672	965.041	94.3592	62.599	12.5431	276.427	192.903	267.641	192.903
MPI-ESM_ICE6G	41.25	53.8103	3.6837	924.959	13.3326	-6.53468	14.9326	-8.69912	876.252	93.4867	58.8747	15.0815	265.551	186.341	249.805	179.772
MPI-ESM_ICE6G	45	53.8103	4.08767	966.671	14.0977	10.2702	15.8391	-8.90427	766.285	89.464	47.6389	16.9189	230.346	163.282	209.704	171.289
MPI-ESM_ICE6G	48.75	53.8103	4.09102	996.435	14.3403	14.8159	16.1503	-9.35525	704.207	84.6508	35.699	20.2259	206.597	141.311	181.636	169.784
MPI-ESM_ICE6G	52.5	53.8103	3.50429	1009.61	13.8073	10.2013	15.6663	-10.1425	690.498	76.3945	30.4096	20.8803	199.938	133.404	169.909	172.879
MPI-ESM_ICE6G	56.25	53.8103	2.72586	1012.31	12.9732	9.57474	14.936	-10.9115	678.059	71.9565	34.6907	19.7612	197.337	131.316	172.192	166.222
MPI-ESM_ICE6G	60	53.8103	2.44313	1025.98	12.7119	9.53841	14.9121	-11.2506	619.489	65.9299	28.2474	21.3656	181.289	113.005	155.653	153.595
MPI-ESM_ICE6G	63.75	53.8103	2.63114	1065.18	13.2947	10.0435	15.6479	-11.4548	524.274	60.7365	19.2795	25.896	157.019	84.5691	131.924	136.155
MPI-ESM_ICE6G	67.5	53.8103	3.02389	1104.33	14.17	10.6349	16.5506	-11.5097	443.116	54.2038	12.4323	30.5575	134.399	63.1421	110.958	121.32
MPI-ESM_ICE6G	71.25	53.8103	3.2586	1127.18	14.7408	10.8811	17.0664	-11.5594	403.397	49.431	10.9642	29.5695	125.977	59.4444	104.623	106.929
MPI-ESM_ICE6G	75	53.8103	3.1559	1119.5	14.6118	10.6241	16.869	-11.5634	404.512	53.3481	12.2612	30.7278	140.664	64.8172	123.644	93.4908
MPI-ESM_ICE6G	78.75	53.8103	2.57492	1073.91	13.6178	2.82252	15.7599	-11.5214	472.619	76.6231	16.2538	42.0596	190.757	86.2648	182.605	86.2819
MPI-ESM_ICE6G	82.5	53.8103	1.31944	1009.23	11.7301	-9.65835	13.8463	-11.8204	607.357	100.087	25.9884	44.504	251.981	104.289	245.816	97.9632
MPI-ESM_ICE6G	86.25	53.8103	-0.709616	966.589	9.31486	-11.1016	11.5502	-13.0795	757.285	105.611	38.9491	36.5994	296.284	130.233	279.571	122.59
MPI-ESM_ICE6G	90	53.8103	-3.30746	984.223	6.80946	-13.812	9.33479	-15.8693	741.355	98.6376	35.0941	33.332	278.572	120.23	255.809	110.859
MPI-ESM_ICE6G	93.75	53.8103	-5.07565	1003.19	5.1872	-17.8862	7.83696	-17.8862	654.052	93.7475	26.5791	37.751	253.227	85.054	232.862	85.054
MPI-ESM_ICE6G	97.5	53.8103	-5.87419	1042.28	4.87323	-19.2383	7.47365	-19.2383	567.899	90.6982	16.273	54.7245	254.248	53.0203	243.927	53.0203
MPI-ESM_ICE6G	101.25	53.8103	-6.10698	1096.36	7.91697	-20.1708	7.91697	-20.1708	553.79	102.669	12.0388	70.6594	280.165	38.7248	280.165	38.7248
MPI-ESM_ICE6G	105	53.8103	-6.51234	1164.64	8.43429	-21.3801	8.43429	-21.3801	568.773	108.246	11.6269	75.1617	301.705	37.0976	301.705	37.0976
MPI-ESM_ICE6G	108.75	53.8103	-7.31474	1234.78	8.6273	-22.9709	8.6273	-22.9709	565.549	103.377	12.0933	73.3049	298.581	38.523	298.581	38.523
MPI-ESM_ICE6G	112.5	53.8103	-8.16673	1293.49	8.54918	-24.5615	8.54918	-24.5615	557.611	104.351	10.9019	76.97	302.808	34.758	302.808	34.758
MPI-ESM_ICE6G	116.25	53.8103	-8.50577	1337.1	8.73563	-25.4419	8.73563	-25.4419	568.549	115.779	8.32232	86.6324	329.778	26.5811	329.778	26.5811
MPI-ESM_ICE6G	120	53.8103	-8.43577	1372.92	9.23472	-25.7038	9.23472	-25.7038	611.22	131.415	7.16541	92.6855	368.61	22.6062	368.61	22.6062
MPI-ESM_ICE6G	123.75	53.8103	-8.50919	1410.58	9.67004	-26.0031	9.67004	-26.0031	656.786	140.287	7.44871	92.1296	393.361	23.2068	393.361	23.2068
MPI-ESM_ICE6G	127.5	53.8103	-8.80415	1428.36	9.66499	-26.3311	9.66499	-26.3311	683.877	141.143	9.25137	87.347	393.543	28.3372	393.543	28.3372
MPI-ESM_ICE6G	131.25	53.8103	-9.04423	1408.95	9.13705	-26.3511	9.13705	-26.3511	701.975	136.571	12.9223	80.2686	381.268	40.8865	381.268	40.8865
MPI-ESM_ICE6G	135	53.8103	-8.35079	1311.67	8.39935	-24.2474	8.39935	-24.7054	744.51	135.717	18.0186	69.8355	372.925	61.5462	372.925	64.2682
MPI-ESM_ICE6G	138.75	53.8103	-6.48827	1141.09	7.68412	-19.9112	7.70556	-21.1021	807.059	131.847	27.9186	54.9555	354.721	95.4683	348.579	98.1223
MPI-ESM_ICE6G	157.5	53.8103	-0.834151	647.215	7.53753	-8.57061	7.53753	-8.57061	815.088	108.207	40.2949	32.4021	297.451	138.51	297.451	138.51
MPI-ESM_ICE6G	-127.5	53.8103	0.396415	695.426	-5.97055	7.08766	9.61671	-7.82642	1805.63	247.471	86.5081	38.8653	627.574	264.014	268.33	558.683
MPI-ESM_ICE6G	-123.75	53.8103	-1.86113	797.37	-9.66743	-3.82953	8.77116	-11.2018	1292.22	151.618	67.526	26.6432	410.443	235.528	276.946	387.586
MPI-ESM_ICE6G	-120	53.8103	-2.34689	874.516	7.37485	-8.56183	8.89856	-12.752	827.431	123.325	43.5579	31.3854	300.259	156.359	284.761	196.062
MPI-ESM_ICE6G	-116.25	53.8103	-1.3016	922.569	8.99709	-10.9772	10.0755	-12.7773	660.961	145.506	19.7507	74.8234	353.829	70.8024	323.14	83.4317
MPI-ESM_ICE6G	-112.5	53.8103	0.691278	941.096	11.0139	-9.53253	11.9756	-11.4378	714.251	164.616	15.2577	84.0772	405.359	54.3805	368.882	63.8838
MPI-ESM_ICE6G	-108.75	53.8103	2.38627	1015.12	13.3625	-8.7945	14.2694	-11.024	665.726	145.753	16.6917	78.3175	359.067	56.8319	345.418	63.6749
MPI-ESM_ICE6G	-105	53.8103	3.13097	1114.13	16.1486	-9.17051	16.1486	-11.69	566.407	106.182	19.6673	66.0833	279.883	64.2683	279.883	70.3312
MPI-ESM_ICE6G	-101.25	53.8103	2.58122	1207.71	16.7317	-13.6183	16.7317	-13.5222	539.565	98.5533	23.09	58.7286	257.342	74.7534	257.342	77.4502
MPI-ESM_ICE6G	-97.5	53.8103	1.41667	1266.64	16.355	-15.3893	16.355	-15.4406	573.214	101.888	24.7281	55.7162	268.109	79.5264	268.109	82.3973
MPI-ESM_ICE6G	-93.75	53.8103	0.491403	1249.52	15.3198	-15.8574	15.3198	-16.232	632.311	104.431	26.8374	52.386	282.197	82.3014	282.197	85.9129
MPI-ESM_ICE6G	-90	53.8103	0.297487	1204.86	13.1449	-15.8324	14.6293	-15.8324	639.258	97.4615	29.5893	46.3392	265.914	91.7612	264.386	91.7612
MPI-ESM_ICE6G	-86.25	53.8103	0.537937	1134.77	12.9832	-13.2472	14.0768	-13.2472	628.651	85.8126	34.0046	38.6326	247.697	104.64	233.407	104.64
MPI-ESM_ICE6G	-82.5	53.8103	0.714927	1079.05	12.684	-9.49447	13.6559	-12.5846	626.238	86.0529	35.0326	36.9307	245.557	106.941	220.005	107.451
MPI-ESM_ICE6G	-75	53.8103	-1.07619	1071.61	10.7867	-13.8604	12.2512	-13.8604	809.093	110.723	37.834	39.3144	316.491	119.523	283.776	119.523
MPI-ESM_ICE6G	-71.25	53.8103	-2.22358	1105.28	10.0237	-15.0865	11.7904	-16.4824	922.481	124.06	40.5604	43.3345	369.211	127.678	350.309	122.751
MPI-ESM_ICE6G	-67.5	53.8103	-2.6085	1098.42	9.76151	-16.8177	11.4825	-16.8177	991.902	140.238	43.3307	41.4998	385.036	134.229	382.758	134.229
MPI-ESM_ICE6G	-63.75	53.8103	-1.88114	1022.54	11.2783	-15.0296	11.2783	-15.0296	1083.5	143.043	52.1665	34.6587	397.724	162.909	397.724	162.909
MPI-ESM_ICE6G	-60	53.8103	-0.279372	877.463	10.8708	-11.3568	10.8708	-10.5321	1113.64	139.096	58.8985	29.0715	387.686	184.865	387.686	194.019
MPI-ESM_ICE6G	-7.5	53.8103	9.9669	332.961	6.54528	14.2553	14.2553	6.40386	1061.68	106.808	72.0746	12.535	311.415	220.775	220.775	282.366
MPI-ESM_ICE6G	-3.75	53.8103	9.4929	369.344	5.59144	14.0906	14.2338	5.3328	1166.9	111.551	84.7939	7.87381	318.708	274.855	282.765	304.046
MPI-ESM_ICE6G	0	50.0995	8.42289	412.706	3.88108	13.2452	13.7802	3.60942	1311.14	157.473	73.0473	26.6652	444.205	227.47	234.296	423.472
MPI-ESM_ICE6G	3.75	50.0995	7.11211	462.238	1.98415	12.3993	13.1203	1.7209	1402.78	158.088	86.2065	20.1966	448.266	275.605	286.253	427.709
MPI-ESM_ICE6G	7.5	50.0995	6.3088	500.231	0.648472	11.8767	12.7449	0.420404	1230.38	121.014	81.4409	11.1866	342.909	267.095	289.747	331.251
MPI-ESM_ICE6G	11.25	50.0995	6.07493	526.965	9.02512	9.50746	12.7719	-0.193345	1000.49	103.963	68.6776	13.2979	301.303	220.052	255.776	230.747
MPI-ESM_ICE6G	15	50.0995	6.06585	550.425	9.3945	-0.550798	12.9953	-0.550798	948.435	109.869	64.1916	20.5093	312.352	197.341	265.095	197.341
MPI-ESM_ICE6G	18.75	50.0995	5.96579	584.819	12.3784	-0.184251	13.3022	-1.12405	1013.49	115.9	61.0158	23.0684	332.129	209.112	310.515	204.93
MPI-ESM_ICE6G	22.5	50.0995	5.87828	636.42	12.7993	-0.909481	13.8523	-1.91963	1056.59	122.677	61.3203	25.2731	359.677	214.111	340.791	205.428
MPI-ESM_ICE6G	26.25	50.0995	6.09025	699.726	13.6385	-2.65714	14.7959	-2.65714	997.456	120.85	57.7575	25.5616	341.729	193.574	305.976	193.574
MPI-ESM_ICE6G	30	50.0995	6.54581	771.129	11.3777	11.2626	16.0431	-3.31777	879.244	113.616	51.7663	25.538	305.537	166.207	227.467	189.866
MPI-ESM_ICE6G	33.75	50.0995	7.20064	850.042	12.2206	12.5967	17.6938	-3.78019	786.831	92.7779	36.9993	27.7318	254.965	120.083	167.168	209.961
MPI-ESM_ICE6G	37.5	50.0995	7.69064	920.944	-4.40817	18.2371	19.181	-4.17762	706.16	77.9327	20.5196	35.5277	224.332	83.3237	132.359	218.056
MPI-ESM_ICE6G	41.25	50.0995	8.20006	971.328	-4.39581	19.6086	20.4174	-4.28511	596.11	70.5861	9.75626	42.0651	202.366	52.1665	99.862	194.67
MPI-ESM_ICE6G	45	50.0995	8.71859	1006.82	-4.20473	20.5889	21.3929	-4.27341	461.713	57.309	3.63634	46.857	165.803	29.4607	60.2432	160.541
MPI-ESM_ICE6G	48.75	50.0995	8.73617	1016.92	-4.5835	20.5721	21.3817	-4.5835	414.249	57.3511	2.93466	49.6424	156.439	26.6806	43.9237	156.439
MPI-ESM_ICE6G	52.5	50.0995	8.03278	1038.49	-5.73139	20.0338	20.7644	-5.73139	420.175	62.5851	2.25754	55.6744	170.907	20.271	43.7894	170.907
MPI-ESM_ICE6G	56.25	50.0995	7.10855	1077.24	-7.1518	19.504	20.268	-7.1518	435.468	66.4492	2.32139	56.688	180.023	23.8559	53.2463	180.023
MPI-ESM_ICE6G	60	50.0995	6.78866	1112.28	-7.84153	19.4766	20.4507	-7.84153	384.144	60.7056	1.58535	58.6934	162.405	21.2978	44.5472	162.405
MPI-ESM_ICE6G	63.75	50.0995	7.1089	1118.77	-7.56912	19.6337	20.9279	-7.56912	295.272	47.5529	1.3972	61.1558	128.922	13.0587	32.7173	128.922
MPI-ESM_ICE6G	67.5	50.0995	7.20369	1100.15	-7.21724	19.3491	20.8284	-7.21724	260.519	40.1685	1.61097	59.9326	112.652	11.4705	26.2176	112.652
MPI-ESM_ICE6G	71.25	50.0995	6.43349	1080.39	-7.35227	18.3878	19.8287	-7.73608	288.205	41.0164	2.76279	54.5908	118.917	16.5389	31.9965	114.819
MPI-ESM_ICE6G	75	50.0995	4.96687	1070.93	-8.64878	16.9804	18.2704	-9.01828	349.198	43.8992	5.24037	45.0234	120.597	27.7123	47.827	117.621
MPI-ESM_ICE6G	78.75	50.0995	3.43829	1062.9	3.27715	15.5329	16.7027	-10.32	383.241	43.1624	8.7505	35.7645	125.293	45.5054	75.9527	99.3013
MPI-ESM_ICE6G	82.5	50.0995	1.8085	1051.71	7.44261	8.8287	15.0196	-11.6777	398.803	52.7925	10.3618	38.9479	149.071	48.7903	97.15	88.0816
MPI-ESM_ICE6G	86.25	50.0995	-0.436776	1050.99	4.76087	11.7911	12.9838	-13.6495	426.313	60.302	10.0612	43.5697	169.012	46.5505	89.9655	95.3182
MPI-ESM_ICE6G	90	50.0995	-3.14969	1030.75	1.67821	3.93128	10.0925	-16.0586	487.012	70.7076	16.2796	39.1481	188.133	69.0107	122.722	98.5191
MPI-ESM_ICE6G	93.75	50.0995	-4.93895	1042.35	5.70876	-18.1286	8.40244	-18.1286	492.806	77.3807	21.8515	45.4607	209.464	72.1231	168.644	72.1231
MPI-ESM_ICE6G	97.5	50.0995	-4.94557	1067.64	6.04186	-18.6641	8.54811	-18.6641	432.55	79.7745	11.5548	65.9114	211.101	38.071	202.062	38.071
MPI-ESM_ICE6G	101.25	50.0995	-4.23038	1109.54	9.66093	-18.6275	9.66093	-18.6275	441.43	105.208	7.95999	84.8295	250.767	26.4697	250.767	26.4697
MPI-ESM_ICE6G	105	50.0995	-3.84801	1158.48	10.6456	-18.8482	10.6456	-18.8482	451.973	112.329	7.75755	89.7298	272.064	26.3348	272.064	26.3348
MPI-ESM_ICE6G	108.75	50.0995	-4.3031	1213.89	10.9744	-19.9104	10.9744	-19.9104	489.422	110.685	8.42239	85.1062	286.033	28.8108	286.033	28.8108
MPI-ESM_ICE6G	112.5	50.0995	-4.8347	1241.98	10.8861	-20.7382	10.8861	-20.7382	548.364	116.718	8.05387	84.1421	314.74	28.1095	314.74	28.1095
MPI-ESM_ICE6G	116.25	50.0995	-4.66738	1250.03	11.2082	-20.622	11.2082	-20.622	621.306	132.959	6.79739	87.4549	358.299	24.3798	358.299	24.3798
MPI-ESM_ICE6G	120	50.0995	-4.24337	1274.78	11.9699	-20.4062	11.9699	-20.4062	696.864	153.081	6.63585	88.3222	400.038	24.1146	400.038	24.1146
MPI-ESM_ICE6G	123.75	50.0995	-4.57263	1341.46	12.4549	-21.4499	12.4549	-21.4499	753.07	158.349	7.23009	86.8773	427.333	25.3083	427.333	25.3083
MPI-ESM_ICE6G	127.5	50.0995	-5.77526	1414.76	12.1677	-23.362	12.1677	-23.362	821.017	162.472	9.38812	82.3037	446.877	31.5304	446.877	31.5304
MPI-ESM_ICE6G	131.25	50.0995	-6.75403	1431.84	11.3847	-24.4081	11.3847	-24.4081	862.751	161.36	12.1355	78.3308	454.299	42.5302	454.299	42.5302
MPI-ESM_ICE6G	135	50.0995	-6.37163	1337.5	10.5055	-22.8486	10.5055	-22.8486	884.254	154.754	16.016	71.4324	442.319	62.2309	442.319	62.2309
MPI-ESM_ICE6G	138.75	50.0995	-4.64102	1146.95	9.54914	-18.3092	9.76041	-18.8726	882.794	138.566	21.0375	59.9914	398.549	75.8381	352.668	85.1049
MPI-ESM_ICE6G	-123.75	50.0995	1.5844	658.427	-6.1158	10.1883	10.1883	-6.05833	1513.44	216.094	35.3479	49.9215	561.634	145.434	145.434	558.159
MPI-ESM_ICE6G	-120	50.0995	-1.32825	803.663	-10.874	7.96098	9.34063	-10.4376	1039.63	125.536	39.7434	34.3562	353.351	141.39	174.746	358.021
MPI-ESM_ICE6G	-116.25	50.0995	-1.68761	890.869	7.99758	-1.90857	9.74492	-12.0869	674.637	94.6068	33.3983	29.7892	241.385	123.669	213.617	165.66
MPI-ESM_ICE6G	-112.5	50.0995	0.0498444	907.634	9.73999	-9.8638	11.3955	-11.0395	575.877	110.518	14.9687	67.7973	286.579	62.2824	247.558	76.2802
MPI-ESM_ICE6G	-108.75	50.0995	2.46446	904.715	12.0704	-7.62935	13.5303	-8.95422	665.653	125.765	15.0814	74.1755	343.774	52.9698	301.711	62.9128
MPI-ESM_ICE6G	-105	50.0995	4.14468	947.676	14.224	-8.51937	15.515	-8.1117	683.132	132.528	17.525	70.2179	345.152	61.5554	312.054	66.7245
MPI-ESM_ICE6G	-101.25	50.0995	4.65745	1036.68	15.7696	-9.24788	17.0034	-8.86686	646.736	125.531	20.6162	63.7688	314.823	68.2458	292.81	73.8748
MPI-ESM_ICE6G	-97.5	50.0995	4.16726	1146.61	17.7748	-11.1653	17.7748	-10.8287	631.504	113.824	23.4766	55.8791	282.718	76.3445	282.718	81.7133
MPI-ESM_ICE6G	-93.75	50.0995	3.33895	1233.91	17.9772	-13.0364	17.9772	-12.8165	672.257	103.66	28.2097	48.138	284.2	88.8797	284.2	94.4639
MPI-ESM_ICE6G	-90	50.0995	2.73501	1269.88	17.9085	-13.8115	17.9085	-13.8115	727.056	100.284	35.0307	40.6781	282.86	109.381	282.86	109.381
MPI-ESM_ICE6G	-86.25	50.0995	2.31322	1238.7	15.4317	-13.7744	17.1481	-13.7744	769.049	98.9114	39.9836	36.4944	286.602	124.104	286.584	124.104
MPI-ESM_ICE6G	-82.5	50.0995	1.99228	1182.1	14.7258	-13.2992	16.1852	-13.2992	790.762	103.435	42.5926	34.8219	293.756	134.451	288.87	134.451
MPI-ESM_ICE6G	-78.75	50.0995	1.46424	1118.2	13.6496	-12.9933	14.9139	-12.9933	866.806	106.884	48.9706	31.6354	311.868	152.199	304.244	152.199
MPI-ESM_ICE6G	-75	50.0995	0.723166	1110.55	12.7677	-13.6998	14.1531	-13.6998	956.372	115.709	52.614	30.7676	336.653	160.692	327.749	160.692
MPI-ESM_ICE6G	-71.25	50.0995	0.0105097	1117.67	12.1583	-14.5675	13.6789	-14.5675	1079.59	133.973	54.3244	33.2745	382.485	169.059	377.702	169.059
[truncated: 6,175 more rows]

## Sheet: Simulation
Source	Longitude	Latitude	BIO1	BIO4	BIO8	BIO9	BIO10	BIO11	BIO12	BIO13	BIO14	BIO15	BIO16	BIO17	BIO18	BIO19
MPI-ESM_GLAC1D	-37.5	83.4789	-17.2743	1318.22	0.551538	-31.8951	0.551538	-31.8951	237.97	36.4878	10.2641	46.1109	97.9688	32.719	97.9688	32.719
MPI-ESM_GLAC1D	-33.75	83.4789	-17.2088	1323.63	0.672632	-31.8593	0.672632	-31.8593	249.563	39.2573	10.7642	47.99	105.937	33.9336	105.937	33.9336
MPI-ESM_GLAC1D	-30	83.4789	-17.2442	1330.08	0.791772	-31.7421	0.791772	-31.8867	256.734	41.1343	11.2375	47.6765	108.166	35.9532	108.166	35.7995
MPI-ESM_GLAC1D	-26.25	83.4789	-17.0331	1329.21	-2.26668	-31.4641	0.938908	-31.6588	258.516	40.1912	11.8261	44.1158	105.361	38.659	102.979	38.3226
MPI-ESM_GLAC1D	15	79.777	-9.48847	923.935	2.41287	-18.6846	2.41287	-19.8704	246.987	30.1816	15.6622	24.3198	80.8532	48.7942	80.8532	50.5518
MPI-ESM_GLAC1D	18.75	79.777	-9.50654	899.99	1.36809	-18.641	2.03917	-19.7213	254.287	32.0556	16.0964	24.2355	83.822	48.8166	82.4891	50.7437
MPI-ESM_GLAC1D	101.25	79.777	-14.3824	1233.19	-0.408606	-28.8274	0.694767	-28.8274	218.117	31.175	10.2083	38.0721	83.9075	31.5488	79.7456	31.5488
MPI-ESM_GLAC1D	-86.25	79.777	-15.1107	1386.1	-0.0205851	-31.7526	2.57107	-31.7526	251.271	36.6603	9.71657	45.2432	99.6334	29.7249	97.9275	29.7249
MPI-ESM_GLAC1D	-82.5	79.777	-15.2243	1380.9	-0.157955	-31.6881	2.53787	-31.6881	263.285	38.6134	9.98554	45.6754	105.068	30.6268	103.43	30.6268
MPI-ESM_GLAC1D	-78.75	79.777	-16.3472	1226.22	-8.2349	-31.0826	-0.45367	-31.0826	246.118	35.8248	10.3983	41.9754	98.6356	32.1127	84.0485	32.1127
MPI-ESM_GLAC1D	-75	79.777	-15.6978	1348.1	1.96169	-31.5208	1.96169	-31.5208	303.311	44.5434	11.0171	46.7987	121.725	33.9498	121.725	33.9498
MPI-ESM_GLAC1D	-71.25	79.777	-16.0368	1316.53	1.39659	-31.3125	1.39659	-31.3125	322.745	48.5267	11.4743	48.8477	133.705	34.9986	133.705	34.9986
MPI-ESM_GLAC1D	-67.5	79.777	-16.4847	1283.52	0.698022	-31.1946	0.698022	-31.1946	326.313	49.4214	11.5569	49.7538	136.897	35.1072	136.897	35.1072
MPI-ESM_GLAC1D	-63.75	79.777	-17.7552	1115.74	-5.27124	-30.4518	-2.52659	-30.4518	275.452	41.885	11.15	44.6069	111.635	33.6501	100.078	33.6501
MPI-ESM_GLAC1D	-60	79.777	-18.4566	1091.92	-6.11889	-30.6009	-3.36448	-30.6009	251.588	38.2328	10.1675	44.4466	102.812	31.5437	92.6407	31.5437
MPI-ESM_GLAC1D	-56.25	79.777	-19.1533	1073.04	-6.94962	-30.8834	-4.20562	-30.8834	232.424	35.264	9.20525	45.0655	96.2555	28.9919	87.3463	28.9919
MPI-ESM_GLAC1D	-52.5	79.777	-19.8509	1059.03	-7.74194	-31.261	-5.02724	-31.261	215.121	32.5069	8.43127	45.5436	90.1344	26.9417	82.126	26.9417
MPI-ESM_GLAC1D	-48.75	79.777	-20.4999	1051.65	-8.44702	-31.692	-5.7193	-31.692	199.338	29.6716	7.7933	45.299	83.8768	25.2888	76.6523	25.2888
MPI-ESM_GLAC1D	-45	79.777	-20.9981	1050.85	-8.94246	-32.0755	-6.18349	-32.0755	187.063	27.3555	7.50792	44.5356	78.4937	24.5253	72.0692	24.5253
MPI-ESM_GLAC1D	-41.25	79.777	-21.2725	1055.2	-9.15014	-32.2942	-6.37164	-32.2942	180.962	26.448	7.53968	43.0604	75.2042	25.0829	69.6252	25.0829
MPI-ESM_GLAC1D	-37.5	79.777	-21.2202	1066.4	-8.9392	-32.2897	-6.16591	-32.2897	186.405	27.1902	8.14197	41.7829	76.7892	27.3869	71.8355	27.3869
MPI-ESM_GLAC1D	-33.75	79.777	-20.8249	1086.06	-8.28686	-32.0579	-5.51357	-32.0579	203.417	28.9032	9.45831	40.7822	83.1629	31.5564	78.2951	31.5564
MPI-ESM_GLAC1D	-30	79.777	-20.1463	1105.14	-7.36954	-31.6061	-4.61187	-31.6061	230.619	32.6902	11.5125	40.1262	93.737	37.4863	88.0096	37.4863
MPI-ESM_GLAC1D	-26.25	79.777	-19.2303	1119.91	-6.29402	-28.9001	-3.57021	-30.9492	268.419	37.7276	13.4756	39.3876	108.068	44.6094	101.159	45.3185
MPI-ESM_GLAC1D	-22.5	79.777	-17.3255	1234.09	-0.397681	-27.7647	-0.397681	-30.3789	345.376	53.9363	15.7251	46.6756	144.888	52.663	144.888	54.1053
MPI-ESM_GLAC1D	-18.75	79.777	-16.3425	1234.15	-2.16251	-26.9984	0.520939	-29.4993	368.77	52.0912	17.659	40.5936	148.372	59.9137	140.521	62.1199
MPI-ESM_GLAC1D	97.5	76.0702	-13.2813	1366.75	2.58228	-28.7154	3.98383	-29.8697	279.666	40.4931	11.1771	47.7077	115.658	34.3659	115.323	34.2996
MPI-ESM_GLAC1D	101.25	76.0702	-13.6542	1387.77	3.97862	-29.2259	3.97862	-30.3821	273.987	41.5619	10.2542	51.2966	117.826	31.6429	117.826	31.5158
MPI-ESM_GLAC1D	105	76.0702	-13.9437	1392.24	2.17017	-29.5859	3.74945	-30.7395	231.989	35.2176	9.62453	44.9872	96.7812	29.4774	89.2945	29.3259
MPI-ESM_GLAC1D	108.75	76.0702	-14.2539	1392.72	1.79517	-29.929	3.43826	-31.0787	221.697	34.2683	9.32422	44.3883	91.8387	28.7394	80.2764	28.5098
MPI-ESM_GLAC1D	-116.25	76.0702	-13.3591	1303.03	0.783451	-29.4785	2.70453	-29.4785	204.487	29.33	9.54273	35.2882	76.2318	32.0147	72.6276	32.0147
MPI-ESM_GLAC1D	-112.5	76.0702	-13.3539	1318.81	0.954024	-29.649	2.95844	-29.649	205.109	29.4444	9.3014	35.5693	76.7325	31.3617	71.8039	31.3617
MPI-ESM_GLAC1D	-86.25	76.0702	-12.9479	1437.12	4.98188	-30.6139	4.98188	-30.6139	272.791	36.8515	10.6334	44.9905	108.015	32.8564	108.015	32.8564
MPI-ESM_GLAC1D	-82.5	76.0702	-12.6786	1436.56	3.14738	-30.2727	5.33083	-30.2727	278.38	36.4269	11.2566	42.3929	107.647	34.4412	106.221	34.4412
MPI-ESM_GLAC1D	-60	76.0702	-16.182	966.844	-5.29793	-26.7662	-2.76031	-26.7662	338.559	45.1274	15.5485	36.5851	126.542	50.2122	121.292	50.2122
MPI-ESM_GLAC1D	-56.25	76.0702	-17.8534	929.979	-4.73752	-27.5631	-4.73752	-27.5631	328.491	46.1357	13.7919	43.1979	130.753	44.7924	130.753	44.7924
MPI-ESM_GLAC1D	-52.5	76.0702	-19.7609	895.453	-9.55184	-28.8906	-7.10667	-28.8906	312.186	44.3358	12.3669	45.1806	126.284	40.0484	125.895	40.0484
MPI-ESM_GLAC1D	-48.75	76.0702	-21.6395	891.515	-11.4848	-30.6067	-9.05979	-30.6067	288.586	41.0995	11.1289	45.436	117.56	35.8413	115.651	35.8413
MPI-ESM_GLAC1D	-45	76.0702	-23.265	910.221	-12.9158	-32.3763	-10.4537	-32.8287	248.07	34.6347	9.86235	42.9532	99.6194	31.8118	96.2258	30.4685
MPI-ESM_GLAC1D	-41.25	76.0702	-24.375	936.727	-13.7087	-33.7408	-11.2297	-34.319	201.63	26.987	9.04397	37.7014	78.437	28.8308	73.4539	27.7922
MPI-ESM_GLAC1D	-37.5	76.0702	-24.9053	950.992	-14.0629	-34.3906	-11.6021	-35.067	167.867	21.758	8.75169	32.4159	63.2695	27.7748	57.5473	26.8894
MPI-ESM_GLAC1D	-33.75	76.0702	-24.6607	959.063	-13.71	-34.8684	-11.2545	-34.8684	166.235	22.0526	9.59647	32.4889	64.0686	29.6396	57.2981	29.6396
MPI-ESM_GLAC1D	-30	76.0702	-23.4305	973.245	-12.2231	-26.0279	-9.87685	-33.7845	203.261	28.0643	11.2346	35.5744	81.0919	36.1291	70.9096	38.2187
MPI-ESM_GLAC1D	-26.25	76.0702	-21.3065	991.127	-9.70678	-24.2635	-7.60146	-31.9036	274.618	38.5317	14.4976	37.4249	110.928	47.4388	95.5635	53.2752
MPI-ESM_GLAC1D	-22.5	76.0702	-17.6634	1105.17	-4.60978	-20.6594	-2.63792	-29.5872	405.769	61.7011	19.6902	43.9927	172.702	67.2207	158.977	73.5657
MPI-ESM_GLAC1D	52.5	72.3616	-8.49042	1006.66	3.47341	-21.0397	3.82316	-20.6725	344.799	42.0695	18.4362	30.9645	119.38	57.4681	118.376	58.0545
MPI-ESM_GLAC1D	56.25	72.3616	-9.4289	1080.41	-0.018103	-23.0481	3.65975	-22.3632	358.66	45.8909	19.8494	27.9754	119.948	60.994	118.861	61.7188
MPI-ESM_GLAC1D	67.5	72.3616	-11.2463	1236.15	3.48202	-25.5657	4.05935	-26.8665	385.644	47.8972	20.6473	30.787	137.921	63.1015	126.238	62.8788
MPI-ESM_GLAC1D	71.25	72.3616	-11.4157	1274.1	3.719	-26.0097	4.48643	-27.4329	378.232	47.5667	19.5986	32.9895	138.253	59.7182	128.389	59.0867
MPI-ESM_GLAC1D	75	72.3616	-11.4873	1304.83	4.00546	-26.2962	4.94021	-27.7962	368.482	47.1055	18.4876	35.0255	137.541	56.8005	128.427	56.0561
MPI-ESM_GLAC1D	78.75	72.3616	-11.5287	1332.83	4.27759	-26.5319	5.39399	-28.0709	357.845	46.78	17.0231	37.0644	135.712	53.5464	126.545	52.9795
MPI-ESM_GLAC1D	82.5	72.3616	-11.6224	1360.98	4.48593	-26.7994	5.81195	-28.3509	351.709	47.2287	15.6886	40.1959	138.125	50.3757	127.86	49.988
MPI-ESM_GLAC1D	86.25	72.3616	-11.8548	1391.98	4.59465	-27.2395	6.13943	-28.8046	353.436	51.4503	14.6231	44.0321	142.759	47.3611	135.604	46.5269
MPI-ESM_GLAC1D	90	72.3616	-12.1885	1423.92	4.60767	-27.7903	6.36534	-29.4153	360.932	56.5571	14.0035	48.1328	150.689	45.1925	146.39	43.7988
MPI-ESM_GLAC1D	93.75	72.3616	-12.6651	1464.02	4.54452	-28.5957	6.52224	-30.2812	367.122	63.5078	13.2836	53.5373	160.64	42.7237	158.753	40.8738
MPI-ESM_GLAC1D	97.5	72.3616	-13.1673	1504.56	6.6186	-29.4746	6.6186	-31.2239	366.638	68.0236	12.5348	58.3972	167.712	39.8977	167.712	37.8464
MPI-ESM_GLAC1D	101.25	72.3616	-13.586	1538.9	6.67784	-30.2565	6.67784	-32.0208	361.537	70.0386	11.5982	62.8907	173.774	36.7257	173.774	34.9012
MPI-ESM_GLAC1D	105	72.3616	-13.8654	1564.63	6.74099	-30.8287	6.74099	-32.6054	349.821	67.9536	10.8221	65.0118	172.426	34.2568	172.426	32.6419
MPI-ESM_GLAC1D	108.75	72.3616	-14.0303	1582.11	6.76899	-31.2526	6.76899	-33.0455	330.232	62.087	10.0221	65.3891	164.279	31.7313	164.279	30.2664
MPI-ESM_GLAC1D	112.5	72.3616	-14.0804	1589.78	6.76964	-31.4531	6.76964	-33.2597	300.434	52.7239	9.35443	62.6273	145.515	29.7493	145.515	28.5011
MPI-ESM_GLAC1D	116.25	72.3616	-14.0873	1587.77	6.67328	-31.5188	6.67328	-33.3235	269.212	43.08	8.71453	58.3448	125.133	28.4956	125.133	27.1467
MPI-ESM_GLAC1D	120	72.3616	-14.0936	1575.98	6.4311	-31.4713	6.4311	-33.2656	246.296	37.3289	8.59534	54.0382	109.041	27.7912	109.041	26.8093
MPI-ESM_GLAC1D	123.75	72.3616	-14.1423	1556.82	6.04438	-31.345	6.04438	-33.1562	235.811	34.7252	8.71831	51.2318	100.637	27.7601	100.637	27.0174
MPI-ESM_GLAC1D	127.5	72.3616	-14.3016	1537.49	3.02238	-31.2662	5.54828	-33.1126	233.017	33.4261	9.13891	49.0625	98.6741	28.5651	95.7393	27.9162
MPI-ESM_GLAC1D	131.25	72.3616	-14.6161	1522.7	2.49309	-31.4166	4.99034	-33.1953	233.377	35.1251	9.55034	48.4717	101.425	29.4072	91.6769	29.0425
MPI-ESM_GLAC1D	138.75	72.3616	-14.9256	1477.86	1.63697	-31.2519	3.96235	-32.9173	272.241	43.3237	10.488	54.7031	122.169	32.4949	121.671	33.1042
MPI-ESM_GLAC1D	142.5	72.3616	-14.8306	1452.92	1.4371	-30.9303	3.68305	-32.5221	256.837	42.9351	10.2163	51.4234	114.281	32.8869	109.748	34.1728
MPI-ESM_GLAC1D	146.25	72.3616	-14.6433	1426.14	1.32707	-25.682	3.50662	-32.0143	230.74	38.5147	10.3296	45.6692	99.781	33.1247	88.6136	34.6254
MPI-ESM_GLAC1D	-123.75	72.3616	-9.84931	1417.9	5.33553	-22.1527	7.69932	-27.138	257.076	34.6404	13.5157	29.7393	92.5187	43.2611	90.8	47.2911
MPI-ESM_GLAC1D	-120	72.3616	-10.12	1434.12	5.27694	-22.4847	7.76378	-27.4804	264.546	34.1334	13.9547	30.2305	97.3841	45.2881	90.6696	47.6038
MPI-ESM_GLAC1D	-116.25	72.3616	-10.3879	1434.26	5.05949	-22.7992	7.56977	-27.7141	254.918	32.4861	13.8846	28.972	93.0593	44.7157	83.2731	46.4867
MPI-ESM_GLAC1D	-112.5	72.3616	-10.645	1430.33	4.80624	-23.1696	7.28396	-27.9531	249.171	30.7742	13.5263	28.3715	89.5451	44.1007	78.6043	44.5606
MPI-ESM_GLAC1D	-108.75	72.3616	-10.8573	1424.69	4.55689	-28.2005	6.96235	-28.2005	250.949	32.2199	13.3687	29.9286	89.6146	42.8984	76.266	42.8984
MPI-ESM_GLAC1D	-93.75	72.3616	-11.5152	1436.9	4.05819	-29.3548	6.25597	-29.3548	306.79	41.6367	12.9098	43.158	122.477	40.0376	119.141	40.0376
MPI-ESM_GLAC1D	-86.25	72.3616	-11.3205	1466.26	6.8061	-29.5781	6.8061	-29.5781	351.789	52.348	13.8164	49.2165	150.573	41.8019	150.573	41.8019
MPI-ESM_GLAC1D	-82.5	72.3616	-10.9125	1480.22	7.44412	-29.2369	7.44412	-29.2369	358.595	59.1582	13.79	53.4834	161.936	42.2492	161.936	42.2492
MPI-ESM_GLAC1D	-78.75	72.3616	-10.093	1479.01	8.28526	-28.3658	8.28526	-28.3658	342.959	55.5945	12.9862	51.8083	153.192	41.7685	153.192	41.7685
MPI-ESM_GLAC1D	-75	72.3616	-9.01907	1458.29	9.17198	-26.9798	9.17198	-26.9798	311.588	48.7841	12.1877	47.0606	133.141	41.1654	133.141	41.1654
MPI-ESM_GLAC1D	-56.25	72.3616	-12.3101	1053	1.92524	-23.9752	1.92524	-23.4505	419.624	66.8268	19.3946	47.3974	181.915	60.5819	181.915	63.0215
MPI-ESM_GLAC1D	-52.5	72.3616	-15.9509	849.766	-4.09625	-24.8997	-4.09625	-24.6217	383.674	52.5931	18.6089	39.1014	151.4	58.3791	151.4	60.8804
MPI-ESM_GLAC1D	-48.75	72.3616	-19.0062	827.806	-7.51357	-27.6393	-7.51357	-27.6393	387.637	53.2116	19.1837	37.7342	149.54	58.9442	149.54	58.9442
MPI-ESM_GLAC1D	-45	72.3616	-21.7375	841.92	-12.1274	-30.6302	-10.1601	-30.6302	356.565	44.4945	19.1346	31.628	128.479	58.842	125.321	58.842
MPI-ESM_GLAC1D	-41.25	72.3616	-23.5051	884.576	-13.3754	-33.0533	-11.4406	-33.0533	304.238	36.7884	18.7501	24.482	103.943	58.2152	93.838	58.2152
MPI-ESM_GLAC1D	-37.5	72.3616	-24.3189	908.544	-19.1457	-19.8876	-11.9934	-34.2851	262.503	33.3883	15.382	23.8422	89.1758	50.7945	70.935	58.6314
MPI-ESM_GLAC1D	-33.75	72.3616	-23.7709	908.73	-18.4966	-19.5165	-11.4029	-33.6849	288.518	38.2078	14.4878	28.9246	103.255	50.0714	80.2452	65.8879
MPI-ESM_GLAC1D	-30	72.3616	-21.3519	905.643	-15.729	-17.523	-9.05328	-31.2701	384.249	51.6571	19.4933	31.4915	140.472	66.8359	112.562	85.2185
MPI-ESM_GLAC1D	-26.25	72.3616	-16.9367	997.295	-5.00822	-19.3586	-3.62164	-27.9694	542.095	72.4799	31.0439	33.2995	206.707	96.7322	178.684	112.491
MPI-ESM_GLAC1D	-22.5	72.3616	-13.0589	962.009	-1.18595	-16.0637	-0.469946	-23.733	648.497	81.7579	38.0377	30.7139	240.111	118.955	207.5	138.983
MPI-ESM_GLAC1D	18.75	68.652	0.326794	782.778	10.4643	-9.40686	10.4643	-9.40686	624.017	90.8825	30.2261	40.8968	252.818	93.3556	252.818	93.3556
MPI-ESM_GLAC1D	22.5	68.652	-0.80553	847.97	10.0841	-11.5013	10.0841	-11.5013	568.137	72.5325	26.2581	36.7398	214.275	81.091	214.275	81.091
MPI-ESM_GLAC1D	26.25	68.652	-1.83011	890.626	9.44216	-13.2584	9.44216	-13.2584	526.956	65.1166	24.349	34.9686	191.112	75.1849	191.112	75.1849
MPI-ESM_GLAC1D	30	68.652	-2.45332	887.626	4.56328	-13.914	8.65831	-13.914	496.207	57.6899	24.4295	30.2513	164.404	74.7929	161.994	74.7929
MPI-ESM_GLAC1D	52.5	68.652	-6.96959	1107.03	6.71965	-21.0514	6.98318	-21.0514	435.725	51.0777	23.0296	27.5548	147.949	69.3382	138.847	69.3382
MPI-ESM_GLAC1D	56.25	68.652	-7.85582	1180.95	6.65845	-22.8502	7.15505	-22.8502	456.116	54.1594	23.0453	28.8933	155.688	69.6456	147.13	69.6456
MPI-ESM_GLAC1D	60	68.652	-8.61005	1249.78	6.60376	-24.5071	7.33149	-24.5071	470.455	55.6013	23.0177	30.4147	162.593	69.6408	153.937	69.6408
MPI-ESM_GLAC1D	63.75	68.652	-9.14798	1300.96	6.64803	-25.6237	7.48188	-25.6237	485.713	59.444	22.6967	32.5197	171.279	68.6596	163.584	68.6596
MPI-ESM_GLAC1D	67.5	68.652	-9.47838	1334.02	6.67082	-26.3131	7.57758	-26.3131	490.644	62.1582	21.9091	35.1515	179.441	66.3741	172.787	66.3741
MPI-ESM_GLAC1D	71.25	68.652	-9.57392	1355.58	6.82902	-26.6054	7.81326	-26.6054	476.559	60.9009	21.2897	34.9612	174.513	64.5302	166.769	64.5302
MPI-ESM_GLAC1D	75	68.652	-9.58694	1364.02	6.93514	-26.6295	7.98578	-26.6295	467.096	58.851	21.1598	35.1529	170.962	63.6087	163.443	63.6087
MPI-ESM_GLAC1D	78.75	68.652	-9.72236	1373.8	6.89803	-26.8079	8.05935	-26.8079	458.811	57.7215	20.7629	35.7477	169.581	63.2471	160.019	63.2471
MPI-ESM_GLAC1D	82.5	68.652	-10.0656	1385.72	6.65455	-27.2317	7.96951	-27.2317	466.997	60.4705	20.43	38.6043	176.488	61.9696	170.015	61.9696
MPI-ESM_GLAC1D	86.25	68.652	-10.6621	1410.68	6.24244	-28.0944	7.78201	-28.0944	471.195	64.4298	19.971	41.9306	183.553	60.0683	179.161	60.0683
MPI-ESM_GLAC1D	90	68.652	-11.4191	1443.18	5.73137	-26.9843	7.51964	-29.1972	473.154	67.6663	18.7595	45.204	190.912	60.3927	186.959	56.762
MPI-ESM_GLAC1D	93.75	68.652	-12.2066	1481.08	5.2828	-28.0976	7.30154	-30.4003	466.305	71.8039	17.0375	48.8473	195.1	55.9843	192.215	51.8902
MPI-ESM_GLAC1D	97.5	68.652	-12.9421	1521.75	7.11013	-29.2545	7.11013	-31.6445	455.665	75.0307	15.2107	53.6688	199.025	50.6781	199.025	46.5379
MPI-ESM_GLAC1D	101.25	68.652	-13.4598	1557.26	7.04958	-30.1653	7.04958	-32.58	443.126	78.2458	13.2961	60.1717	208.734	44.4576	208.734	40.5891
MPI-ESM_GLAC1D	105	68.652	-13.6581	1592.8	7.31195	-30.7903	7.31195	-33.222	427.297	79.1811	11.7554	66.3123	214.541	39.0108	214.541	35.6094
MPI-ESM_GLAC1D	108.75	68.652	-13.5685	1624.39	7.80544	-31.1106	7.80544	-33.5488	396.723	72.4339	10.4752	69.0855	204.758	34.2341	204.758	31.4961
MPI-ESM_GLAC1D	112.5	68.652	-13.2779	1651.3	8.42263	-31.1966	8.42263	-33.6699	353.84	61.6587	9.33633	68.0944	181.095	30.7376	181.095	28.5083
MPI-ESM_GLAC1D	116.25	68.652	-12.9532	1672.88	9.01117	-31.1497	9.01117	-33.6432	313.931	54.9195	8.38578	66.3698	158.592	27.8358	158.592	25.8678
MPI-ESM_GLAC1D	120	68.652	-12.7743	1686.38	9.34581	-31.0794	9.34581	-33.6321	288.962	49.1502	8.18127	62.9189	141.311	27.379	141.311	25.4713
MPI-ESM_GLAC1D	123.75	68.652	-12.8622	1689.77	9.27094	-31.0716	9.27094	-33.7382	285.015	46.25	8.55891	59.5142	133.92	28.3098	133.92	26.493
MPI-ESM_GLAC1D	127.5	68.652	-13.2782	1688.64	8.84776	-31.2213	8.84776	-33.9309	292.303	46.8457	9.38649	57.787	133.397	30.0403	133.397	28.6463
MPI-ESM_GLAC1D	131.25	68.652	-13.9733	1679.53	8.01313	-31.6419	8.01313	-34.3053	317.989	55.1739	10.2557	61.9259	150.608	31.822	150.608	30.9783
MPI-ESM_GLAC1D	135	68.652	-14.6296	1664.5	7.15115	-32	7.15115	-34.5559	344.214	63.7607	11.4725	65.6537	168.389	34.4584	168.389	34.445
MPI-ESM_GLAC1D	138.75	68.652	-14.9504	1642.98	6.55414	-32.0403	6.55414	-34.4954	376.376	73.5918	12.3952	67.7863	188.206	38.5938	188.206	39.331
MPI-ESM_GLAC1D	142.5	68.652	-14.9141	1617.26	6.2436	-31.7636	6.2436	-34.0852	412.552	82.3361	14.022	67.3256	205.903	44.507	205.903	45.6537
MPI-ESM_GLAC1D	146.25	68.652	-14.4833	1586.33	3.55559	-31.0924	6.29438	-33.2369	426.629	82.4337	15.6269	63.4897	207.117	49.8347	206.501	51.103
MPI-ESM_GLAC1D	150	68.652	-13.8358	1554.48	6.56261	-30.2154	6.56261	-32.2434	413.005	76.4788	15.9542	58.7248	192.973	51.8698	192.973	53.8805
MPI-ESM_GLAC1D	153.75	68.652	-13.2025	1521.21	4.28345	-29.3216	6.80935	-31.2903	375.888	65.9919	15.1804	53.728	168.991	50.2618	168.094	52.8569
MPI-ESM_GLAC1D	157.5	68.652	-12.8228	1486.34	4.35376	-28.6139	6.78656	-30.5227	337.5	56.8266	14.0115	49.3693	147.239	46.9759	143.889	49.9587
MPI-ESM_GLAC1D	161.25	68.652	-12.8218	1450.42	4.05038	-23.3675	6.36078	-30.0898	321.589	51.7082	13.5814	47.3198	138.831	45.6394	133.376	48.7778
MPI-ESM_GLAC1D	165	68.652	-13.1376	1416.45	3.47551	-28.2395	5.60037	-30.0214	331.393	52.1969	14.2324	45.5476	141.523	47.8838	133.616	50.9702
MPI-ESM_GLAC1D	168.75	68.652	-13.5949	1373.64	2.66561	-28.3619	4.48253	-30.0312	373.535	57.285	16.2829	43.9324	157.114	54.541	147.83	57.8043
MPI-ESM_GLAC1D	172.5	68.652	-13.8824	1330.13	1.97616	-28.4016	3.43044	-29.9505	421.931	63.0045	19.5088	39.4821	170.532	64.6586	157.509	67.9448
MPI-ESM_GLAC1D	176.25	68.652	-13.7803	1286.07	1.57968	-28.1673	2.67784	-29.5742	459.774	65.9289	22.7547	34.5307	176.398	74.712	159.623	78.1116
MPI-ESM_GLAC1D	180	68.652	-13.1704	1243.96	1.57837	-23.4567	2.42263	-27.4915	452.436	59.7933	24.2546	28.8806	160.782	78.6571	140.141	78.8157
MPI-ESM_GLAC1D	-161.25	68.652	-8.43688	1235.01	4.35767	-19.2549	6.31391	-23.7063	351.559	51.1568	17.1541	35.2048	133.196	54.3152	127.775	59.8467
MPI-ESM_GLAC1D	-157.5	68.652	-8.26272	1252.78	6.84255	-18.9385	6.84255	-23.6152	388.559	56.9481	18.2367	41.1528	156.158	56.5803	156.158	61.2783
MPI-ESM_GLAC1D	-153.75	68.652	-8.22089	1268.3	7.21169	-18.7367	7.21169	-23.5944	461.541	73.2872	19.3452	53.1081	212.249	60.8068	212.249	63.14
MPI-ESM_GLAC1D	-150	68.652	-8.16783	1272.55	7.40245	-18.5166	7.40245	-23.4824	485.883	83.9157	19.3315	59.2376	236.485	61.4038	236.485	63.0502
MPI-ESM_GLAC1D	-146.25	68.652	-8.03828	1271.99	7.55675	-18.2614	7.55675	-23.2792	467.159	80.6675	18.9408	59.053	227.041	59.4505	227.041	61.955
MPI-ESM_GLAC1D	-142.5	68.652	-7.80358	1285.2	7.97081	-18.0355	7.97081	-24.996	480.34	85.9792	18.5745	62.8574	240.787	58.3472	240.787	63.454
MPI-ESM_GLAC1D	-138.75	68.652	-7.49466	1313.97	8.67328	-17.8728	8.67328	-24.9987	539.968	105.829	18.7633	71.1808	287.58	59.817	287.58	62.6436
MPI-ESM_GLAC1D	-135	68.652	-7.14847	1340.99	9.37315	-22.9225	9.37315	-25.0013	543.822	103.352	18.7301	69.8539	285.264	59.3812	285.264	61.8009
MPI-ESM_GLAC1D	-131.25	68.652	-6.6024	1343.05	9.97992	-22.2819	9.97992	-24.5963	542.35	95.9284	19.9169	61.3266	263.607	62.5236	263.607	62.8404
MPI-ESM_GLAC1D	-127.5	68.652	-6.4608	1369.33	10.4584	-22.3359	10.4584	-24.8645	531.588	87.8832	20.4292	53.6704	240.067	65.7151	240.067	65.1971
MPI-ESM_GLAC1D	-123.75	68.652	-6.522	1395.27	10.7521	-22.61	10.7521	-25.3261	520.561	79.2573	21.6689	46.9173	220.225	69.9485	220.225	69.3977
MPI-ESM_GLAC1D	-120	68.652	-6.76582	1415.3	10.7924	-23.0553	10.7924	-25.8743	505.558	70.8066	22.936	39.904	198.009	73.4343	198.009	72.7658
MPI-ESM_GLAC1D	-116.25	68.652	-7.12291	1433.34	10.6837	-23.6516	10.6837	-26.4908	493.519	63.5876	23.2966	35.4458	181.879	74.5005	181.879	73.2088
MPI-ESM_GLAC1D	-112.5	68.652	-7.49368	1448.45	7.9677	-24.2786	10.5027	-27.0579	471.06	59.8046	22.7254	33.6117	169.079	72.1013	167.422	70.1542
MPI-ESM_GLAC1D	-108.75	68.652	-7.7847	1458.11	7.83814	-24.8242	10.3087	-27.4648	434.911	54.8722	20.3563	33.4498	155.896	65.637	151.158	64.0606
MPI-ESM_GLAC1D	-105	68.652	-7.99222	1464.44	7.75025	-25.3059	10.1544	-27.7213	386.264	47.5115	17.3837	33.2762	137.499	57.2986	129.601	56.4623
MPI-ESM_GLAC1D	-97.5	68.652	-8.44241	1462.8	7.34335	-26.1738	9.64464	-28.0514	348.959	46.6727	13.8592	38.9302	130.996	46.4749	129.36	46.6758
MPI-ESM_GLAC1D	-93.75	68.652	-8.9302	1462.51	9.12315	-26.8404	9.12315	-26.8404	349.545	48.6656	13.5987	42.0461	136.867	45.3806	136.867	45.3806
MPI-ESM_GLAC1D	-90	68.652	-9.42744	1449.54	6.20468	-27.3463	8.48318	-27.3463	369.043	52.8292	14.2417	42.3182	145.88	47.4267	144.522	47.4267
MPI-ESM_GLAC1D	-82.5	68.652	-10.0547	1433.19	7.69672	-27.9303	7.69672	-27.9303	434.041	66.5889	18.2655	46.1113	181.801	58.1977	181.801	58.1977
MPI-ESM_GLAC1D	-75	68.652	-8.44648	1420.2	9.088	-26.0957	9.088	-26.0957	448.856	72.364	19.1487	50.8133	199.775	59.9477	199.775	59.9477
MPI-ESM_GLAC1D	-71.25	68.652	-6.63414	1375.14	10.3009	-25.039	10.3009	-23.6686	374.23	57.5507	15.7468	48.2929	161.665	48.3283	161.665	51.1015
MPI-ESM_GLAC1D	-67.5	68.652	-4.19892	1261.73	11.4187	-20.9934	11.4187	-19.8001	293.038	41.5057	13.1212	41.762	118.857	40.6119	118.857	43.1054
MPI-ESM_GLAC1D	-52.5	68.652	-9.70332	914.91	2.41222	-20.1875	2.41222	-20.1875	522.607	80.0452	23.1936	43.997	218.951	82.2769	218.951	82.2769
MPI-ESM_GLAC1D	-48.75	68.652	-13.5951	749.217	-3.30849	-21.7311	-3.30849	-21.7311	515.92	65.5658	29.4926	27.6843	180	97.0393	180	97.0393
MPI-ESM_GLAC1D	-45	68.652	-16.0993	751.764	-7.2823	-24.2285	-5.81565	-24.2285	592.201	68.2037	37.509	22.2893	197.372	119.947	187.813	119.947
MPI-ESM_GLAC1D	-41.25	68.652	-17.5196	776.337	-12.7531	-19.27	-6.99469	-25.9824	658.447	78.675	40.3996	18.8965	208.265	139.473	178.315	150.478
MPI-ESM_GLAC1D	-37.5	68.652	-17.5187	803.263	-12.3618	-14.1271	-6.68349	-26.3138	736.783	92.4085	42.0428	22.2775	243.415	141.154	176.791	182.966
MPI-ESM_GLAC1D	-33.75	68.652	-15.1418	788.274	-9.67435	-7.18748	-4.58713	-23.8216	872.294	109.293	48.5004	24.9054	292.91	156.105	192.665	225.305
MPI-ESM_GLAC1D	15	64.9419	1.24346	803.5	11.4754	-8.88798	11.4754	-8.88798	820.905	113.139	47.2084	30.6766	300.434	145.856	300.434	145.856
MPI-ESM_GLAC1D	18.75	64.9419	-0.0247686	890.792	11.3868	-11.3027	11.3868	-11.3027	845.604	111.832	46.5048	29.2735	303.163	143.761	303.163	143.761
MPI-ESM_GLAC1D	22.5	64.9419	-0.931995	951.85	11.2722	-13.0983	11.2722	-13.0983	856.541	110.158	44.7196	30.4746	309.07	135.434	309.07	135.434
MPI-ESM_GLAC1D	26.25	64.9419	-1.49466	992.388	11.198	-14.33	11.198	-14.33	842.039	106.055	41.9464	30.9943	302.272	126.027	302.272	126.027
MPI-ESM_GLAC1D	30	64.9419	-1.82099	1012.48	11.0932	-15.0664	11.0932	-15.0664	815.864	101.153	38.9523	31.4912	291.359	117.456	291.359	117.456
MPI-ESM_GLAC1D	33.75	64.9419	-2.04072	1021.21	10.9923	-15.498	10.9923	-15.498	785.295	95.2521	37.4233	30.5643	271.944	112.901	271.944	112.901
MPI-ESM_GLAC1D	41.25	64.9419	-2.67386	1047.97	10.7963	-16.4531	10.7963	-16.4531	776.371	104.388	34.9621	36.2548	288.075	105.413	288.075	105.413
MPI-ESM_GLAC1D	45	64.9419	-3.22952	1081.28	9.75481	-17.3138	10.7781	-17.3138	685.722	86.6865	32.2676	32.6074	246.66	98.2047	237.438	98.2047
MPI-ESM_GLAC1D	48.75	64.9419	-3.85875	1117.4	9.63046	-18.2884	10.6915	-18.2884	672.885	80.7284	31.0992	31.2527	235.895	95.1347	222.676	95.1347
MPI-ESM_GLAC1D	52.5	64.9419	-4.57588	1151.22	9.33814	-19.3717	10.4376	-19.3717	660.166	76.5903	29.6248	31.2671	228.313	90.7777	214.971	90.7777
MPI-ESM_GLAC1D	56.25	64.9419	-5.29544	1183.94	8.97225	-20.485	10.1375	-20.485	647.261	77.8854	27.47	32.9838	226.706	84.7686	215.355	84.7686
MPI-ESM_GLAC1D	60	64.9419	-6.00166	1208.04	8.51848	-21.5651	9.64594	-21.5651	646.753	84.5239	25.2623	37.2229	236.686	78.7556	230.64	78.7556
MPI-ESM_GLAC1D	63.75	64.9419	-6.50686	1233.9	8.30949	-22.4446	9.41547	-22.4446	640.307	86.2926	24.146	39.8215	240.369	75.1759	237.084	75.1759
MPI-ESM_GLAC1D	67.5	64.9419	-6.80862	1259.24	8.35962	-23.0572	9.41287	-23.0572	623.221	84.3244	23.2132	39.6402	233.637	72.4333	230.272	72.4333
MPI-ESM_GLAC1D	71.25	64.9419	-6.92532	1285.13	8.64152	-23.4303	9.66482	-23.4303	593.984	77.2772	23.0777	35.9444	213.321	71.9222	208.925	71.9222
MPI-ESM_GLAC1D	75	64.9419	-7.12682	1296.3	8.64413	-23.6972	9.6212	-23.6972	592.165	72.3758	23.8294	33.9135	208.22	73.6871	202.219	73.6871
MPI-ESM_GLAC1D	78.75	64.9419	-7.47317	1307.77	8.46314	-24.1217	9.45258	-24.1217	605.427	74.124	24.6445	33.6954	213.653	76.2754	206.039	76.2754
MPI-ESM_GLAC1D	82.5	64.9419	-8.03942	1325.53	8.07577	-24.8776	9.15961	-24.8776	623.163	81.5561	24.7088	36.7963	230.95	76.6884	220.649	76.6884
MPI-ESM_GLAC1D	86.25	64.9419	-8.80797	1352.72	7.53085	-25.9589	8.75857	-25.9589	628.125	87.0585	23.5585	41.6844	245.493	73.7937	239.825	73.7937
MPI-ESM_GLAC1D	90	64.9419	-9.65872	1388.23	8.37771	-27.2526	8.37771	-27.2526	602.415	87.303	21.5932	45.3285	242.981	67.8689	242.981	67.8689
MPI-ESM_GLAC1D	93.75	64.9419	-10.4585	1430.01	8.1225	-28.5683	8.1225	-28.5683	564.47	86.2951	19.1674	49.948	241.95	60.098	241.95	60.098
MPI-ESM_GLAC1D	97.5	64.9419	-11.1301	1464.41	7.87445	-29.6875	7.87445	-29.6875	516.634	80.626	16.6413	52.7569	227.966	51.8559	227.966	51.8559
MPI-ESM_GLAC1D	101.25	64.9419	-11.5975	1493.45	7.80349	-27.483	7.80349	-30.4655	464.166	72.9519	13.9778	55.1717	209.292	49.2654	209.292	43.5508
MPI-ESM_GLAC1D	105	64.9419	-11.8366	1522.42	7.97211	-28.0976	7.97211	-31.041	427.865	69.4362	11.8457	58.9533	199.651	41.6226	199.651	36.845
MPI-ESM_GLAC1D	108.75	64.9419	-11.8459	1553.69	8.41873	-28.4863	8.41873	-31.4049	395.949	66.6244	10.3483	63.3455	192.994	35.8757	192.994	32.0584
MPI-ESM_GLAC1D	112.5	64.9419	-11.6581	1583.01	9.06651	-28.6386	9.06651	-31.5358	376.726	65.0362	9.69492	65.9239	188.679	32.8064	188.679	29.5832
MPI-ESM_GLAC1D	116.25	64.9419	-11.4922	1625.72	9.80414	-28.9609	9.80414	-31.9088	368.847	65.6728	9.25866	68.3898	188.941	30.9948	188.941	28.3212
MPI-ESM_GLAC1D	120	64.9419	-11.4007	1650.08	10.2182	-28.9654	10.2182	-32.0293	375.554	65.4811	9.16935	67.0489	189.273	31.5199	189.273	28.23
MPI-ESM_GLAC1D	123.75	64.9419	-11.8563	1686.55	10.142	-29.6204	10.142	-32.8802	384.016	69.215	9.39332	68.0399	194.539	31.8684	194.539	28.601
MPI-ESM_GLAC1D	127.5	64.9419	-12.7095	1711.97	9.49164	-30.47	9.49164	-33.8457	391.213	71.5034	9.43862	70.0229	200.68	31.3663	200.68	28.5263
MPI-ESM_GLAC1D	131.25	64.9419	-13.7388	1706.47	8.33474	-34.4856	8.33474	-34.4856	396.451	73.5783	9.32784	73.1146	208.233	28.2146	208.233	28.2146
MPI-ESM_GLAC1D	135	64.9419	-14.6319	1679.4	7.07628	-31.6458	7.07628	-34.7923	411.545	83.3882	9.55743	77.7785	224.171	30.8381	224.171	29.5843
MPI-ESM_GLAC1D	138.75	64.9419	-15.0279	1632.09	6.0906	-31.5013	6.0906	-34.4062	439.274	89.7039	12.1506	75.5817	234.305	37.7957	234.305	37.5713
MPI-ESM_GLAC1D	142.5	64.9419	-14.9253	1582.87	5.57628	-30.8938	5.57628	-33.5397	494.757	96.298	17.142	68.2261	248.233	52.2416	248.233	52.783
MPI-ESM_GLAC1D	146.25	64.9419	-14.3308	1544.11	3.62981	-29.9843	5.70779	-32.4322	548.732	102.005	22.3382	61.0924	264.043	68.1291	257.12	69.1456
MPI-ESM_GLAC1D	150	64.9419	-13.4782	1518.02	4.36027	-28.9531	6.28982	-31.2825	555.563	95.6595	25.1246	54.5441	254.756	76.9819	245.697	78.4092
MPI-ESM_GLAC1D	153.75	64.9419	-12.6057	1504.03	5.15389	-27.9856	7.10753	-30.2721	502.372	83.7234	24.8964	48.1719	220.263	77.1406	206.535	79.4776
MPI-ESM_GLAC1D	157.5	64.9419	-11.9862	1497.8	5.76587	-22.1332	7.81586	-29.5599	444.859	72.456	23.31	43.1899	186.941	71.274	171.17	76.1905
MPI-ESM_GLAC1D	161.25	64.9419	-11.8174	1484.4	5.8746	-22.0212	7.91482	-29.2259	428.463	67.7701	22.4404	41.4759	177.146	68.9039	161.168	75.1209
MPI-ESM_GLAC1D	165	64.9419	-11.9626	1460.34	5.57707	-22.2191	7.4656	-29.166	459.525	71.3969	23.5617	40.4883	187.834	74.6375	171.589	81.7606
MPI-ESM_GLAC1D	168.75	64.9419	-12.1825	1418.34	4.99699	-22.4405	6.57107	-29.1113	525.661	77.5425	26.9191	37.4596	208.432	87.3792	192.088	95.5865
MPI-ESM_GLAC1D	172.5	64.9419	-12.1581	1360.11	4.46444	-22.404	5.60232	-28.6914	602.891	84.0118	31.6326	32.4308	226.896	103.921	208.686	114.128
MPI-ESM_GLAC1D	176.25	64.9419	-11.6992	1288.16	4.1285	-21.8532	4.80414	-27.7063	656.08	85.1642	35.7187	26.4527	228.928	117.731	211.819	129.492
MPI-ESM_GLAC1D	180	64.9419	-10.6677	1213.78	4.13697	-20.7595	4.4988	-24.7936	656.353	77.9496	36.99	22.6178	216.726	120.896	198.157	123.879
MPI-ESM_GLAC1D	-176.25	64.9419	-9.27916	1152.22	4.48723	-19.3441	4.73839	-23.1816	571.637	65.0115	34.4064	21.3189	183.112	108.752	161.001	112.896
MPI-ESM_GLAC1D	-172.5	64.9419	-7.7484	1113.73	1.22799	-3.40773	5.50987	-21.5592	470.295	55.0433	26.699	25.8706	154.548	84.9364	127.327	95.0746
MPI-ESM_GLAC1D	-161.25	64.9419	-6.10615	1178.91	6.30494	-15.6651	8.22862	-20.3925	590.375	88.7195	25.1348	41.6391	234.165	80.0605	225.101	90.0478
MPI-ESM_GLAC1D	-157.5	64.9419	-6.49352	1207.76	6.17343	-15.6683	8.47732	-22.7513	687.353	104.237	27.8646	44.9446	282.353	90.8984	270.293	112.642
MPI-ESM_GLAC1D	-153.75	64.9419	-6.93476	1212.72	5.86418	-15.6605	8.32953	-23.1614	757.621	111.635	30.9323	44.7304	307.451	102.385	300.224	123.892
MPI-ESM_GLAC1D	-150	64.9419	-7.23343	1197.07	5.52043	-8.57472	7.97472	-23.1835	776.941	111.133	32.8524	43.7516	311.143	107.644	306.583	128.91
MPI-ESM_GLAC1D	-146.25	64.9419	-7.36331	1172.03	7.56716	-8.68866	7.56716	-22.9524	752.098	106.671	32.4024	43.89	301.305	106.722	301.305	123.22
MPI-ESM_GLAC1D	-142.5	64.9419	-7.36461	1154.7	7.3074	-15.4079	7.3074	-22.7115	688.589	99.3155	29.5015	45.8404	287.826	96.5699	287.826	108.863
MPI-ESM_GLAC1D	-138.75	64.9419	-7.29218	1159.28	7.34711	-15.4255	7.34711	-22.6946	612.754	97.4365	25.0948	52.105	276.953	80.8928	276.953	91.7342
MPI-ESM_GLAC1D	-135	64.9419	-7.08108	1190.48	7.83995	-15.4613	7.83995	-22.8632	619.889	121.44	22.3232	69.3622	323.067	71.4466	323.067	77.9006
MPI-ESM_GLAC1D	-131.25	64.9419	-6.69925	1228.16	8.54763	-20.5078	8.54763	-23.0065	614.804	130.392	20.7526	76.7824	335.22	66.5486	335.22	69.5618
MPI-ESM_GLAC1D	-127.5	64.9419	-6.11657	1259.27	9.38813	-20.2552	9.38813	-22.9062	645.044	134.291	20.9724	78.3299	354.35	65.2255	354.35	67.1078
MPI-ESM_GLAC1D	-123.75	64.9419	-5.10957	1261.17	10.2722	-22.0983	10.2722	-22.0983	684.227	132.18	23.1023	71.0045	357.683	71.7243	357.683	71.7243
MPI-ESM_GLAC1D	-120	64.9419	-4.50296	1297.92	11.2143	-22.0872	11.2143	-22.0872	680.967	125.952	25.4864	63.4567	338.375	78.7429	338.375	78.7429
MPI-ESM_GLAC1D	-116.25	64.9419	-4.52705	1323.92	11.409	-22.6302	11.409	-22.6302	719.215	122.703	27.3398	57.8876	337.989	84.6805	337.989	84.6805
MPI-ESM_GLAC1D	-112.5	64.9419	-4.82197	1369.37	11.6375	-23.625	11.6375	-23.625	695.491	107.453	28.9663	48.898	301.191	88.7665	301.191	88.7665
MPI-ESM_GLAC1D	-108.75	64.9419	-5.29967	1414.91	11.7429	-24.761	11.7429	-24.761	637.73	87.8618	29.0768	40.5258	252.745	87.4108	252.745	87.4108
MPI-ESM_GLAC1D	-105	64.9419	-5.69013	1445.2	11.7918	-25.5794	11.7918	-25.5794	573.754	77.3813	26.5334	37.6195	216.989	79.8644	216.989	79.8644
MPI-ESM_GLAC1D	-101.25	64.9419	-5.7554	1446.82	11.823	-25.6477	11.823	-25.6477	507.295	67.5547	22.3804	38.1105	188.98	67.603	188.98	67.603
MPI-ESM_GLAC1D	-97.5	64.9419	-5.54674	1417.02	11.7273	-24.9628	11.7273	-24.9628	453.71	61.5344	17.7265	42.3863	178.591	54.895	178.591	54.895
MPI-ESM_GLAC1D	-93.75	64.9419	-5.27005	1364.7	11.3992	-21.9316	11.3992	-21.9316	407.694	59.5365	14.2658	44.8866	167.172	50.6995	167.172	50.6995
MPI-ESM_GLAC1D	-90	64.9419	-5.87389	1352.48	10.5535	-22.7773	10.5535	-22.7773	368.971	60.6313	12.129	53.8883	167.05	42.2517	167.05	42.2517
MPI-ESM_GLAC1D	-86.25	64.9419	-6.72578	1319.07	9.24164	-23.4173	9.24164	-23.4173	366.922	57.6474	13.6061	48.3534	158.587	46.5046	158.587	46.5046
MPI-ESM_GLAC1D	-71.25	64.9419	-6.50019	1251.52	8.58865	-23.263	8.58865	-22.3404	455.84	74.0963	20.384	47.8868	195.038	62.9208	195.038	64.3335
MPI-ESM_GLAC1D	-67.5	64.9419	-4.29186	1160.25	9.588	-19.8164	9.588	-19.0813	405.254	65.5741	18.3112	48.8455	175.016	55.2233	175.016	56.1009
MPI-ESM_GLAC1D	-48.75	64.9419	-7.43411	552.519	-0.884517	-13.7155	-0.253149	-13.7155	780.896	104.602	40.1278	31.9432	282.007	143.12	277.881	143.12
MPI-ESM_GLAC1D	-45	64.9419	-8.411	561.054	-1.72436	-14.7526	-0.992082	-14.7526	1097.94	129.616	68.8609	23.3998	369.503	219.123	345.983	219.123
MPI-ESM_GLAC1D	-41.25	64.9419	-8.19681	562.132	-4.16459	-9.72902	-0.788306	-14.5481	1379.86	159.927	92.5916	15.1853	414.202	299.675	359.242	327.172
MPI-ESM_GLAC1D	-18.75	64.9419	6.28903	447.274	9.95846	2.51461	12.0294	1.29757	528.752	53.6812	38.4942	10.2585	153.591	120.78	137.53	127.793
MPI-ESM_GLAC1D	7.5	61.2316	5.61358	535.152	12.2703	4.28986	12.2703	-1.17899	987.081	110.975	58.4895	20.0059	310.394	192.195	310.394	213.54
MPI-ESM_GLAC1D	11.25	61.2316	4.05938	619.32	11.1389	-1.00101	11.7566	-3.92834	1036.36	118.811	61.9066	20.8654	328.212	203.692	324.707	218.393
MPI-ESM_GLAC1D	15	61.2316	2.7114	710.595	10.6904	-3.07588	11.5457	-6.48498	1094.71	132.009	69.8027	22.2064	354.04	218.831	351.942	215.518
MPI-ESM_GLAC1D	22.5	61.2316	1.36944	881.616	12.3745	-10.1119	12.3745	-10.1119	1034.05	142.601	57.9251	29.7729	370.547	175.424	370.547	175.424
MPI-ESM_GLAC1D	26.25	61.2316	1.10869	948.562	12.9194	-11.3131	12.9194	-11.3131	986.548	139.969	50.7883	34.0772	370.942	152.892	370.942	152.892
MPI-ESM_GLAC1D	30	61.2316	0.835257	997.251	13.2455	-12.2968	13.2455	-12.2968	917.858	130.017	45.1945	35.9731	351.637	136.357	351.637	136.357
MPI-ESM_GLAC1D	33.75	61.2316	0.383272	1027.96	13.2202	-13.1907	13.2202	-13.1907	885.619	121.274	42.5373	35.209	333.088	129.167	333.088	129.167
MPI-ESM_GLAC1D	37.5	61.2316	-0.221709	1059.07	13.1114	-14.1894	13.1114	-14.1894	871.447	119.862	41.0429	35.5394	324.592	124.607	324.592	124.607
MPI-ESM_GLAC1D	41.25	61.2316	-0.839384	1084.96	12.9311	-15.0957	12.9311	-15.0957	894.983	122.299	40.9789	35.3676	330.954	125.188	330.954	125.188
MPI-ESM_GLAC1D	45	61.2316	-1.44095	1104.15	12.7032	-15.8515	12.7032	-15.8515	809.046	95.5844	39.6591	27.7591	270.117	122.75	270.117	122.75
MPI-ESM_GLAC1D	48.75	61.2316	-1.9971	1113.17	12.3321	-16.483	12.3321	-16.483	833.707	94.8031	38.596	28.4052	274.995	121.413	274.995	121.413
MPI-ESM_GLAC1D	52.5	61.2316	-2.51272	1115.99	11.9122	-17.0052	11.9122	-17.0052	816.479	91.9919	36.8646	28.2843	266.247	116.349	266.247	116.349
MPI-ESM_GLAC1D	56.25	61.2316	-3.10501	1105.52	11.1876	-17.4843	11.1876	-17.4843	805.012	93.7792	34.8168	31.0481	272.698	109.296	272.698	109.296
MPI-ESM_GLAC1D	60	61.2316	-3.66263	1102.03	10.5841	-18.0559	10.5841	-18.0559	808.323	107.011	32.9246	36.8818	296.609	102.24	296.609	102.24
MPI-ESM_GLAC1D	63.75	61.2316	-4.05374	1121	10.4519	-18.7037	10.4519	-18.7037	795.54	115.686	31.5322	40.3165	306.228	97.3833	306.228	97.3833
MPI-ESM_GLAC1D	67.5	61.2316	-4.2165	1159.75	10.8204	-19.3216	10.8204	-19.3216	755.884	113.624	30.1885	39.7666	290.988	94.3187	290.988	94.3187
MPI-ESM_GLAC1D	71.25	61.2316	-4.41149	1187.41	10.9721	-19.8678	10.9721	-19.8678	727.446	107.655	29.191	38.1814	273.785	92.0302	273.785	92.0302
MPI-ESM_GLAC1D	75	61.2316	-4.50084	1219.9	11.351	-20.2877	11.351	-20.2877	674.218	90.5895	28.3179	32.0695	234.962	90.1538	234.962	90.1538
MPI-ESM_GLAC1D	78.75	61.2316	-4.77428	1236.47	11.3269	-20.7005	11.3269	-20.7005	655.601	79.6232	28.8896	27.4431	212.393	91.6287	212.393	91.6287
MPI-ESM_GLAC1D	82.5	61.2316	-5.2554	1250.05	11.06	-21.289	11.06	-21.289	679.637	78.7142	29.8599	26.977	219.185	94.8889	219.185	94.8889
MPI-ESM_GLAC1D	86.25	61.2316	-5.90465	1264.89	10.603	-22.1237	10.603	-22.1237	722.105	88.0991	29.309	31.5869	249.37	93.547	249.37	93.547
MPI-ESM_GLAC1D	90	61.2316	-6.53177	1290.98	10.269	-23.1471	10.269	-23.1471	708.143	97.9773	25.6309	38.5741	268.258	82.3781	268.258	82.3781
MPI-ESM_GLAC1D	93.75	61.2316	-7.04023	1319.71	10.0769	-24.095	10.0769	-24.095	660.487	103.681	20.4913	48.0432	278.147	66.0547	278.147	66.0547
MPI-ESM_GLAC1D	97.5	61.2316	-7.40905	1346.71	10.034	-24.8203	10.034	-24.8203	590.816	96.9646	15.9231	54.4905	265.993	51.6771	265.993	51.6771
MPI-ESM_GLAC1D	101.25	61.2316	-7.84964	1370.95	9.92849	-25.5364	9.92849	-25.5364	530.869	86.9705	13.4685	56.4004	242.373	43.5628	242.373	43.5628
MPI-ESM_GLAC1D	105	61.2316	-8.50214	1400.32	9.73057	-26.4615	9.73057	-26.4615	492.095	78.0589	12.9257	54.618	218.986	41.0169	218.986	41.0169
MPI-ESM_GLAC1D	108.75	61.2316	-9.32425	1439.67	9.50401	-27.6953	9.50401	-27.6953	481.386	76.1331	13.2886	54.6404	213.354	41.3454	213.354	41.3454
MPI-ESM_GLAC1D	112.5	61.2316	-10.0962	1485.77	9.39464	-28.9147	9.39464	-28.9147	495.123	81.1642	13.4507	58.5935	228.924	41.3981	228.924	41.3981
MPI-ESM_GLAC1D	116.25	61.2316	-10.66	1537.89	9.51508	-30.0533	9.51508	-30.0533	512.982	88.472	13.4221	63.1609	248.25	41.3665	248.25	41.3665
MPI-ESM_GLAC1D	120	61.2316	-11.0972	1595.27	9.74945	-31.1484	9.74945	-31.1484	511.719	93.8507	12.684	68.839	259.956	38.861	259.956	38.861
MPI-ESM_GLAC1D	123.75	61.2316	-11.4688	1633.73	9.71625	-31.9479	9.71625	-31.9479	497.078	92.2432	11.4881	72.3873	259.114	35.0498	259.114	35.0498
MPI-ESM_GLAC1D	127.5	61.2316	-11.9462	1646.85	9.1863	-32.496	9.1863	-32.496	473.072	89.48	10.2858	75.1056	250.406	31.0738	250.406	31.0738
MPI-ESM_GLAC1D	131.25	61.2316	-12.4147	1610.43	8.11729	-32.3177	8.11729	-32.3177	463.999	91.6767	9.70352	78.2512	249.357	29.5309	249.357	29.5309
MPI-ESM_GLAC1D	135	61.2316	-12.6774	1535.94	6.83083	-31.4602	6.83083	-31.4602	493.321	99.8046	10.4684	82.1195	274.001	32.2933	274.001	32.2933
MPI-ESM_GLAC1D	138.75	61.2316	-12.4564	1436.63	5.7488	-29.8199	5.7488	-29.9518	539.366	109.474	13.2792	79.6931	292.817	43.7981	292.817	42.6764
MPI-ESM_GLAC1D	142.5	61.2316	-11.7925	1341.55	4.18189	-27.7802	5.14594	-28.1373	617.001	123.39	17.3734	74.4523	321.876	59.9346	320.731	59.2746
MPI-ESM_GLAC1D	146.25	61.2316	-10.9151	1281.06	4.55428	-26.0601	5.22732	-26.5273	644.117	121.29	22.0522	66.7059	323.648	76.0476	311.654	75.8468
MPI-ESM_GLAC1D	150	61.2316	-10.1201	1254.05	5.1285	-25.317	5.73708	-25.317	642.241	111.387	29.2281	55.9727	303.394	91.4013	276.841	91.4013
MPI-ESM_GLAC1D	157.5	61.2316	-9.43085	1249.78	5.95337	-18.3422	6.68826	-24.1835	588.626	96.8863	30.9065	46.1177	257.435	100.282	226.675	102.281
MPI-ESM_GLAC1D	161.25	61.2316	-9.1649	1226.81	6.03736	-11.8553	6.75922	-23.5963	617.385	93.5328	33.4959	38.7836	250.665	109.462	218.363	115.219
MPI-ESM_GLAC1D	165	61.2316	-9.01468	1196.53	5.96835	-11.8768	6.51964	-23.1282	662.724	94.7824	37.3572	34.6254	257.437	119.129	227.034	129.521
MPI-ESM_GLAC1D	168.75	61.2316	-8.65156	1153.52	5.86939	-17.8194	6.27224	-22.4407	745.073	103.538	43.5623	34.0153	286.59	134.721	262.863	141.132
MPI-ESM_GLAC1D	172.5	61.2316	-8.08222	1084.94	5.61678	-17.2517	5.74425	-20.4218	781.121	99.7164	46.1798	26.7444	275.307	146.002	247.389	149.669
MPI-ESM_GLAC1D	-161.25	61.2316	-3.68932	959.864	6.89478	-11.8995	7.77289	-15.5657	854.801	110.393	40.3286	31.959	302.887	132.583	274.331	143.082
MPI-ESM_GLAC1D	-157.5	61.2316	-4.14196	1014.38	3.15507	-12.1149	8.31586	-17.763	1021.52	131.968	48.7654	31.3306	359.348	161.752	314.248	196.308
MPI-ESM_GLAC1D	-153.75	61.2316	-4.34443	1026.7	2.91744	-6.3117	8.55935	-17.9238	1221.4	156.265	60.848	30.7675	429.838	200.2	367.098	239.012
MPI-ESM_GLAC1D	-150	61.2316	-4.33597	994.804	2.78007	-6.34686	8.31326	-17.3483	1315.85	167.309	70.5699	29.3705	459.592	220.961	357.813	273.593
MPI-ESM_GLAC1D	-146.25	61.2316	-4.38105	947.369	2.55481	-6.39178	7.65505	-16.7688	1392.51	176.138	76.0128	30.3287	486.545	228.884	372.688	290.287
MPI-ESM_GLAC1D	-142.5	61.2316	-4.69046	917.626	2.08281	-6.65871	6.91742	-16.8138	1393.03	176.887	69.2448	31.3644	487.224	222.771	380.073	288.333
MPI-ESM_GLAC1D	-138.75	61.2316	-5.33108	925.787	1.33671	-7.20688	6.38878	-17.6321	1295.17	161.799	58.4358	31.2208	445.82	200.144	377.905	265.649
MPI-ESM_GLAC1D	-135	61.2316	-5.94388	969.673	4.83684	-7.6828	6.38748	-18.8658	1103.74	131.065	49.4974	30.9272	371.277	170.225	352.05	220.656
MPI-ESM_GLAC1D	-131.25	61.2316	-6.1208	1032.23	6.96169	-13.3669	6.96169	-19.8951	860.526	111.649	45.4459	32.2371	306.439	142.385	306.439	163.114
MPI-ESM_GLAC1D	-127.5	61.2316	-5.66539	1093.92	7.95063	-13.2699	7.95063	-20.2467	666.101	116.482	30.5247	50.7483	290.685	96.5741	290.685	103.94
MPI-ESM_GLAC1D	-123.75	61.2316	-4.51777	1135.29	7.8913	-17.3151	9.29177	-19.7259	633.908	131.861	22.8428	73.9582	334.306	69.9953	326.121	71.3426
MPI-ESM_GLAC1D	-120	61.2316	-2.5902	1118.58	9.58596	-17.4813	10.7729	-17.7942	692.065	145.689	21.6621	78.2081	374.044	67.2571	367.592	68.5504
MPI-ESM_GLAC1D	-116.25	61.2316	-1.64147	1151.83	11.9324	-17.4479	11.9324	-17.4479	716.661	142.832	23.2666	74.66	374.449	72.6834	374.449	72.6834
MPI-ESM_GLAC1D	-112.5	61.2316	-1.5692	1213.65	12.6316	-18.3033	12.6316	-18.3033	684.304	116.363	27.9532	60.4946	328.925	86.8901	328.925	86.8901
MPI-ESM_GLAC1D	-108.75	61.2316	-2.36054	1292.14	12.8491	-20.1575	12.8491	-20.1575	639.657	90.5226	32.4703	41.6366	261.3	101.774	261.3	101.774
MPI-ESM_GLAC1D	-105	61.2316	-3.51793	1346.02	12.4916	-22.0774	12.4916	-22.0774	640.679	89.267	34.2009	35.2919	242.732	104.826	242.732	104.826
MPI-ESM_GLAC1D	-101.25	61.2316	-4.30276	1353.37	11.9422	-23.0071	11.9422	-23.0071	628.999	88.0676	30.7974	37.701	238.357	92.7114	238.357	92.7114
MPI-ESM_GLAC1D	-97.5	61.2316	-4.26126	1309.42	11.5437	-22.3112	11.5437	-22.3112	581.019	82.3333	24.485	43.5926	229.653	75.5868	229.653	75.5868
MPI-ESM_GLAC1D	-75	61.2316	-4.90221	1182.15	9.41222	-19.8854	9.41222	-19.8854	423.928	55.4745	21.8286	38.1581	159.372	66.2182	159.372	66.2182
MPI-ESM_GLAC1D	-71.25	61.2316	-4.91149	1184.37	9.54568	-20.1803	9.54568	-19.8125	471.448	66.0334	23.9547	39.2298	182.475	72.7714	182.475	74.2721
MPI-ESM_GLAC1D	-45	61.2316	-1.83792	296.615	1.55754	-4.19633	1.59581	-5.61128	1154.21	127.753	79.3545	18.3898	369.301	244.219	349.691	247.691
MPI-ESM_GLAC1D	15	57.521	5.27911	629.777	13.0105	4.1564	13.0105	-3.05399	1103.8	134.363	74.3355	19.6913	352.14	227.258	352.14	237.813
MPI-ESM_GLAC1D	26.25	57.521	4.23972	830.093	14.3237	-6.97522	14.3237	-6.97522	920.38	118.06	55.135	25.1313	313.193	166.6	313.193	166.6
MPI-ESM_GLAC1D	30	57.521	3.29473	890.824	14.0587	-8.78967	14.0587	-8.78967	945.916	116.195	54.5536	25.5799	316.371	164.385	316.371	164.385
MPI-ESM_GLAC1D	33.75	57.521	2.13311	931.44	13.4116	-10.4778	13.4116	-10.4778	853.728	90.7925	50.7534	20.8313	259.509	152.514	259.509	152.514
MPI-ESM_GLAC1D	37.5	57.521	1.22995	965.37	11.4239	-11.7981	12.9838	-11.7981	876.255	94.1952	48.9027	22.5287	269.698	148.717	268.143	148.717
MPI-ESM_GLAC1D	41.25	57.521	0.732067	998.896	11.2617	-12.6901	12.9884	-12.6901	870.428	93.253	48.3069	21.5624	270.1	148.907	263.063	148.907
MPI-ESM_GLAC1D	45	57.521	0.506319	1028.87	11.3438	-13.2604	13.2071	-13.2604	860.078	97.0629	47.9683	21.0802	269.019	150.182	256.337	150.182
MPI-ESM_GLAC1D	48.75	57.521	0.2918	1045.71	11.2891	-13.679	13.2325	-13.679	856.195	100.855	46.522	22.323	272.564	147.172	256.981	147.172
MPI-ESM_GLAC1D	52.5	57.521	-0.111683	1045.79	10.8353	-14.0631	12.8484	-14.0631	853.881	102.237	44.9787	23.9732	277.449	141.799	262.144	141.799
MPI-ESM_GLAC1D	56.25	57.521	-0.669625	1037.39	10.0671	-14.4804	12.2149	-14.4804	859.876	103.548	42.7775	27.3883	291.831	134.189	279.749	134.189
MPI-ESM_GLAC1D	60	57.521	-1.19095	1041.03	9.41995	-14.998	11.7983	-14.998	861.177	110.276	41.2932	31.5003	308.111	128.867	300.034	128.867
MPI-ESM_GLAC1D	63.75	57.521	-1.47317	1068.89	9.29169	-15.5852	11.9213	-15.5852	843.191	116.462	40.1939	35.4838	317.693	125.201	312.443	125.201
MPI-ESM_GLAC1D	67.5	57.521	-1.48229	1116.51	9.75979	-16.1946	12.5261	-16.1946	784.591	116.296	38.461	38.0436	305.832	119.587	299.563	119.587
MPI-ESM_GLAC1D	71.25	57.521	-1.31302	1158.67	10.4382	-16.5768	13.2123	-16.5768	698.881	102.792	34.4747	38.5052	274.716	107.717	267.497	107.717
MPI-ESM_GLAC1D	75	57.521	-1.13105	1178.88	10.9772	-16.6484	13.6538	-16.6484	595.653	86.169	29.4378	36.3649	229.485	92.0222	221.519	92.0222
MPI-ESM_GLAC1D	78.75	57.521	-1.12454	1167.43	11.015	-13.83	13.586	-16.4179	554.898	74.5739	27.7335	31.5962	201.769	96.1418	195.111	87.2714
MPI-ESM_GLAC1D	82.5	57.521	-1.62373	1135.63	10.2403	-13.8131	12.8191	-16.4121	614.863	78.5093	29.6921	29.0058	214.05	104.898	207.745	94.2517
MPI-ESM_GLAC1D	86.25	57.521	-2.63626	1110.76	8.87763	-17.0657	11.6498	-17.0657	731.949	91.204	32.7239	29.0835	251.091	104.821	242.86	104.821
MPI-ESM_GLAC1D	90	57.521	-3.77135	1119.56	7.7038	-18.3587	10.7299	-18.3587	771.161	102.595	30.8345	32.9082	272.474	99.6945	267.159	99.6945
MPI-ESM_GLAC1D	93.75	57.521	-4.69827	1151.62	10.2156	-19.7851	10.2156	-19.7851	720.656	105.965	24.1418	41.538	278.339	79.0038	278.339	79.0038
MPI-ESM_GLAC1D	97.5	57.521	-5.25849	1189.29	10.0991	-20.886	10.0991	-20.886	651.191	104.395	17.4777	53.1252	285.186	58.0309	285.186	58.0309
MPI-ESM_GLAC1D	101.25	57.521	-5.7917	1228.82	10.0737	-21.9199	10.0737	-21.9199	629.84	109.446	14.6086	61.5746	300.018	48.3548	300.018	48.3548
MPI-ESM_GLAC1D	105	57.521	-6.72903	1278.03	9.85037	-23.4023	9.85037	-23.4023	633.585	110.467	14.8769	62.0199	303.421	48.7158	303.421	48.7158
MPI-ESM_GLAC1D	108.75	57.521	-8.09866	1350.27	9.52745	-25.5683	9.52745	-25.5683	607.087	101.126	16.0373	58.7944	283.587	50.9248	283.587	50.9248
MPI-ESM_GLAC1D	112.5	57.521	-9.52102	1423.96	9.06456	-27.8665	9.06456	-27.8665	604.339	106.252	15.7141	63.1623	294.845	48.9825	294.845	48.9825
MPI-ESM_GLAC1D	116.25	57.521	-10.5075	1496.74	8.94086	-29.7304	8.94086	-29.7304	595.083	116.52	14.0615	72.9504	313.986	43.0285	313.986	43.0285
MPI-ESM_GLAC1D	120	57.521	-10.9447	1544.87	8.99164	-30.6855	8.99164	-30.6855	611.368	126.871	12.883	80.7972	341.144	38.9405	341.144	38.9405
MPI-ESM_GLAC1D	123.75	57.521	-10.9618	1566.37	9.16547	-30.7968	9.16547	-30.7968	618.668	128.053	11.9949	83.3551	349.905	36.3923	349.905	36.3923
MPI-ESM_GLAC1D	127.5	57.521	-10.8579	1555.54	9.03331	-30.4192	9.03331	-30.4192	606.045	122.471	11.5656	81.8753	334.247	35.2219	334.247	35.2219
MPI-ESM_GLAC1D	131.25	57.521	-10.5785	1497.2	8.45779	-29.3958	8.45779	-29.3958	599.153	123.742	12.7482	79.5855	321.193	38.5944	321.193	38.5944
MPI-ESM_GLAC1D	135	57.521	-9.86998	1387.53	6.41171	-27.122	7.62771	-27.4882	623.249	124.994	16.2485	73.5908	319.104	53.1219	316.133	51.9537
MPI-ESM_GLAC1D	157.5	57.521	-4.34638	896.855	7.05168	-14.9635	7.05168	-14.9635	677.114	98.8395	39.1125	38.7944	272.713	123.659	272.713	123.659
MPI-ESM_GLAC1D	-157.5	57.521	-0.311227	721.54	1.77251	-6.77966	8.31521	-9.10022	1182.08	131.558	66.7073	19.0664	365.435	226.744	297.769	232.351
MPI-ESM_GLAC1D	-153.75	57.521	0.460909	721.704	2.32915	-5.82523	9.24945	-8.11324	1283.27	137.204	79.5044	16.887	396.131	260.684	301.669	268.994
MPI-ESM_GLAC1D	-135	57.521	-0.642444	726.037	1.15206	1.71727	8.64268	-10.0032	1922.91	254.641	91.4972	34.1373	719.161	295.909	397.536	465.068
MPI-ESM_GLAC1D	-131.25	57.521	-2.70494	826.158	-1.21903	0.401514	7.98708	-13.2793	1628.87	213.069	60.3574	34.5481	600.21	236.62	347.909	412.707
MPI-ESM_GLAC1D	-127.5	57.521	-3.63675	922.411	-2.60835	-5.54933	8.3393	-15.3834	1162.26	136.789	50.0441	26.287	384.964	184.817	300.377	290.25
MPI-ESM_GLAC1D	-123.75	57.521	-3.36006	990.378	9.11078	-10.43	9.11078	-16.0781	735.279	107.15	37.269	34.7494	273.722	123.483	273.722	150.613
MPI-ESM_GLAC1D	-120	57.521	-1.74238	985.811	8.99286	-11.9739	10.2553	-14.6901	645.316	134.045	21.9321	70.6512	336.94	75.5361	316.24	85.9353
MPI-ESM_GLAC1D	-116.25	57.521	-0.187041	1006.05	10.6921	-10.9009	11.7377	-13.6894	666.064	148.93	18.0078	82.0198	375.87	58.8767	351.375	67.2789
MPI-ESM_GLAC1D	-112.5	57.521	0.830863	1064.01	12.2422	-10.6946	13.239	-13.6412	654.378	134.517	20.8481	76.2087	348.042	66.1154	344.159	71.7357
MPI-ESM_GLAC1D	-108.75	57.521	0.760062	1147.87	14.1277	-11.7792	14.1277	-14.9056	625.99	111.89	26.3413	59.6265	301.184	84.9411	301.184	89.981
MPI-ESM_GLAC1D	-105	57.521	-0.317249	1226.01	14.0815	-17.0221	14.0815	-17.0221	673.438	111.112	34.8746	49.347	300.777	107.601	300.777	107.601
MPI-ESM_GLAC1D	-101.25	57.521	-1.64863	1266.73	13.3497	-18.9427	13.3497	-18.9427	709.265	114.321	36.0282	47.7652	311.735	108.697	311.735	108.697
MPI-ESM_GLAC1D	-97.5	57.521	-2.45901	1243.58	12.3569	-19.5162	12.3569	-19.5162	713.217	114.154	31.2006	49.3182	312.606	96.0315	312.606	96.0315
MPI-ESM_GLAC1D	-93.75	57.521	-2.22252	1180.91	11.8478	-18.3574	11.8478	-18.3574	638.992	95.8529	26.9714	47.244	268.467	87.6205	268.467	87.6205
MPI-ESM_GLAC1D	-75	57.521	-2.17841	1103.08	10.3336	-15.7584	11.6342	-15.7584	608.273	77.6127	32.0687	32.3111	219.898	101.402	201.869	101.402
MPI-ESM_GLAC1D	-71.25	57.521	-3.12698	1126.64	9.64218	-16.705	11.2377	-16.705	734.843	94.208	38.2398	34.9468	275.307	116.629	257.737	116.629
MPI-ESM_GLAC1D	-67.5	57.521	-3.12682	1087.99	9.38046	-16.1484	10.7866	-16.1484	841.624	103.793	46.1674	30.9141	299.316	141.721	296.718	141.721
MPI-ESM_GLAC1D	-63.75	57.521	-2.02558	990.989	9.62395	-13.8704	10.614	-13.8704	919.026	107.494	54.9678	24.8054	307.309	169.306	303.332	169.306
MPI-ESM_GLAC1D	0	53.8103	8.75127	428.111	13.8505	7.45588	14.1459	3.51762	1473.74	161.009	96.1612	16.2032	435.952	300.963	435.536	355.25
MPI-ESM_GLAC1D	7.5	53.8103	6.9347	530.929	0.537531	5.79377	13.5353	0.152389	1194.38	118.148	75.1624	13.5172	335.525	248.591	329.635	318.609
MPI-ESM_GLAC1D	11.25	53.8103	6.76657	561.182	13.683	2.48597	13.683	-0.558549	1163.6	128.379	78.5488	15.6039	358.144	244.252	358.144	263.201
MPI-ESM_GLAC1D	15	53.8103	6.95277	593.822	13.0879	0.196008	14.2319	-0.910763	979.215	110.587	66.7099	19.0401	314.447	202.184	309.197	203.098
MPI-ESM_GLAC1D	18.75	53.8103	6.93568	639.748	14.7644	-0.318966	14.7644	-1.62691	921.168	99.8309	63.9988	15.229	281.084	196.583	281.084	198.195
MPI-ESM_GLAC1D	22.5	53.8103	6.37806	705.565	14.9643	-1.60738	14.9643	-3.17313	981.484	107.193	68.4328	14.6639	299.605	208.794	299.605	210.417
MPI-ESM_GLAC1D	26.25	53.8103	5.30922	780.491	14.7377	-3.54618	14.7377	-5.38081	987.913	99.2357	69.1451	12.4837	289.383	209.809	289.383	210.594
MPI-ESM_GLAC1D	30	53.8103	4.18096	851.934	14.3881	-5.50191	14.3881	-7.56115	1042.67	100.226	70.5362	12.2693	293.242	217.454	293.242	214.445
MPI-ESM_GLAC1D	33.75	53.8103	3.35332	904.286	12.6791	-6.91076	14.1765	-9.10412	1073.62	103.354	71.2404	12.8079	307.555	221.109	300.443	215.054
MPI-ESM_GLAC1D	37.5	53.8103	3.00469	942.915	12.6804	-7.68029	14.3256	-9.95243	1025.47	105.659	65.7868	15.248	309.393	206.477	296.427	200.8
MPI-ESM_GLAC1D	41.25	53.8103	3.20017	971.464	13.1166	-7.85868	14.8842	-10.136	944.715	106.177	61.6255	17.9526	299.189	193.102	285.338	188.662
MPI-ESM_GLAC1D	45	53.8103	3.57452	1004.47	13.7533	-7.94852	15.6303	-10.2239	799.578	92.9467	53.2975	18.8286	253.149	172.877	234.685	171.517
MPI-ESM_GLAC1D	48.75	53.8103	3.61911	1034.75	14.0345	10.6004	15.9734	-10.5768	707.589	78.7485	40.6935	18.7444	212.372	148.581	192.261	160.024
MPI-ESM_GLAC1D	52.5	53.8103	3.06687	1050.43	-7.468	10.2638	15.5261	-11.2851	683.106	72.4621	38.7502	19.6626	189.208	141.995	178.245	159.494
MPI-ESM_GLAC1D	56.25	53.8103	2.21856	1051.22	12.7429	9.52487	14.6752	-12.0338	687.184	73.2391	36.8848	20.4793	206.172	141.731	187.727	155.276
MPI-ESM_GLAC1D	60	53.8103	1.76625	1058.5	12.347	9.24492	14.3634	-12.4212	638.139	70.573	31.029	21.3043	196.326	125.586	177.782	147.645
MPI-ESM_GLAC1D	63.75	53.8103	1.86	1091.28	12.806	9.60169	14.8823	-12.6562	527.768	63.2904	20.8115	25.0432	163.429	91.1261	144.799	132.354
MPI-ESM_GLAC1D	67.5	53.8103	2.22963	1127.89	13.6335	10.1394	15.7397	-12.7487	453.512	56.9414	15.3635	29.4838	141.535	68.1241	120.624	120.625
MPI-ESM_GLAC1D	71.25	53.8103	2.48451	1153.03	14.2513	10.4025	16.3282	-12.8541	413.434	48.9859	12.8469	29.1977	130.765	62.875	113.994	106.328
MPI-ESM_GLAC1D	75	53.8103	2.44512	1140.68	14.1485	10.1388	16.172	-12.7526	440.09	60.8225	14.9414	33.0969	157.377	75.8124	146.491	92.6907
MPI-ESM_GLAC1D	78.75	53.8103	1.9723	1087.16	15.1264	-10.1744	15.1264	-12.5032	521.693	87.4091	20.2608	43.5098	209.573	89.9138	209.573	84.0166
MPI-ESM_GLAC1D	82.5	53.8103	0.920056	1014.07	13.3745	-12.4713	13.3745	-12.4713	665.999	106.606	31.2181	44.5354	273.456	96.3802	273.456	96.3802
MPI-ESM_GLAC1D	86.25	53.8103	-0.840524	973.295	9.25263	-13.4811	11.407	-13.4811	820.007	114.648	37.7547	37.9495	320.747	118.122	307.697	118.122
MPI-ESM_GLAC1D	90	53.8103	-3.08108	976.245	6.90497	-15.6627	9.4669	-15.6627	817.169	109.823	36.5825	32.8528	301.025	115.683	280.154	115.683
MPI-ESM_GLAC1D	93.75	53.8103	-5.01614	1028.63	5.47528	-18.5149	8.11729	-18.5149	697.424	103.057	26.1606	40.939	275.395	83.0538	257.248	83.0538
MPI-ESM_GLAC1D	97.5	53.8103	-5.81855	1075.55	5.22594	-20.0807	7.81065	-20.0807	615.847	104.076	16.6521	57.4602	279.754	53.3445	271.511	53.3445
MPI-ESM_GLAC1D	101.25	53.8103	-6.10192	1135.22	8.22211	-21.1875	8.22211	-21.1875	607.978	109.537	11.9874	72.0948	312.088	38.6923	312.088	38.6923
MPI-ESM_GLAC1D	105	53.8103	-6.50719	1205.81	8.75401	-22.4212	8.75401	-22.4212	625.608	116.32	11.8478	75.864	333.659	38.0394	333.659	38.0394
MPI-ESM_GLAC1D	108.75	53.8103	-7.28567	1282.19	9.0255	-24.1028	9.0255	-24.1028	621.634	112.858	13.0446	73.2905	325.524	41.6411	325.524	41.6411
MPI-ESM_GLAC1D	112.5	53.8103	-8.1776	1352.19	9.01052	-25.8932	9.01052	-25.8932	614.699	113.54	11.4754	76.5466	329.583	36.7841	329.583	36.7841
MPI-ESM_GLAC1D	116.25	53.8103	-8.59654	1408.99	9.22472	-27.0019	9.22472	-27.0019	624.955	125.099	8.42467	85.9375	355.658	26.6445	355.658	26.6445
MPI-ESM_GLAC1D	120	53.8103	-8.27607	1422.44	9.72732	-26.6302	9.72732	-26.6302	685.816	140.364	7.75392	88.9577	396.362	24.2767	396.362	24.2767
MPI-ESM_GLAC1D	123.75	53.8103	-8.18785	1449.23	10.1791	-26.623	10.1791	-26.623	753.282	151.468	8.15513	87.4799	428.469	26.0738	428.469	26.0738
MPI-ESM_GLAC1D	127.5	53.8103	-8.4927	1473.93	10.2221	-27.0156	10.2221	-27.0156	778.008	151.217	10.1627	83.1488	425.474	32.0262	425.474	32.0262
MPI-ESM_GLAC1D	131.25	53.8103	-8.79332	1456.09	9.69607	-27.0898	9.69607	-27.0898	783.816	148.031	14.9893	76.8477	406.678	45.3124	406.678	45.3124
MPI-ESM_GLAC1D	135	53.8103	-8.21926	1357.92	8.88682	-25.5813	8.88682	-25.5813	800.073	140.999	21.6379	68.0494	388.467	67.339	388.467	67.339
MPI-ESM_GLAC1D	138.75	53.8103	-6.52981	1186.23	8.17082	-21.163	8.17082	-22.1406	836.36	131.43	30.6183	53.9004	364.716	98.7487	364.716	97.7342
MPI-ESM_GLAC1D	157.5	53.8103	-0.798369	663.514	5.52617	-8.70308	7.81275	-8.70308	818.117	110.961	44.2604	33.4651	303.175	132.861	295.927	132.861
MPI-ESM_GLAC1D	-127.5	53.8103	0.276013	705.913	-6.25056	6.93557	9.52029	-8.2135	1767.21	238.376	77.0571	37.8183	610.101	263.685	286.647	546.593
MPI-ESM_GLAC1D	-123.75	53.8103	-1.96113	809.806	-9.9667	-3.98683	8.67328	-11.6705	1290.02	149.455	64.7214	25.8885	406.297	225.764	298.043	387.374
MPI-ESM_GLAC1D	-120	53.8103	-2.4914	885.322	7.21943	-8.76859	8.7182	-13.2936	856.995	132.121	43.6225	35.3517	327.014	154.165	307.045	199.04
MPI-ESM_GLAC1D	-116.25	53.8103	-1.44469	919.2	8.63284	-11.1692	9.75531	-13.1009	712.207	156.82	21.2203	76.8	391.293	76.083	344.301	89.0269
MPI-ESM_GLAC1D	-112.5	53.8103	0.449678	932.288	10.4545	-9.76358	11.5502	-11.7727	771.197	170.89	17.5758	80.822	430.738	61.0124	379.604	73.9753
MPI-ESM_GLAC1D	-108.75	53.8103	2.08802	990.416	12.5267	-11.5198	13.726	-11.166	750.834	160.242	20.6266	74.6313	399.53	69.324	367.295	76.8916
MPI-ESM_GLAC1D	-105	53.8103	2.75078	1081.3	14.0671	-12.1923	15.4493	-11.8125	659.377	127.978	24.1375	63.5234	317.326	77.51	312.653	83.0388
MPI-ESM_GLAC1D	-101.25	53.8103	2.14825	1172.42	15.9539	-13.954	15.9539	-13.6582	640.884	112.681	28.2282	57.4695	300.998	89.4381	300.998	91.2618
MPI-ESM_GLAC1D	-97.5	53.8103	1.10056	1227.31	15.6687	-15.4833	15.6687	-15.3815	667.898	116.33	33.8157	50.2675	297.324	102.835	297.324	104.515
MPI-ESM_GLAC1D	-93.75	53.8103	0.0863968	1214	14.517	-15.9384	14.517	-16.2734	732.838	122.714	35.1593	47.5624	313.732	106.857	313.732	110.294
MPI-ESM_GLAC1D	-90	53.8103	-0.172881	1170.69	12.6917	-15.8951	13.7631	-15.8951	731.44	106.47	38.8835	40.0158	289.625	118.392	285.53	118.392
MPI-ESM_GLAC1D	-86.25	53.8103	0.0750036	1112.45	12.5738	-14.6783	13.3217	-13.3912	700.315	91.7573	41.2593	33.4452	266.325	126.879	247.18	130.758
MPI-ESM_GLAC1D	-82.5	53.8103	0.251273	1069.51	12.3785	-3.25441	13.0437	-12.8652	678.39	86.8619	42.3355	30.8291	250.987	130.722	221.192	132.698
MPI-ESM_GLAC1D	-75	53.8103	-1.29137	1063.71	10.7027	-13.901	11.8705	-13.901	877.272	117.04	43.7891	37.5112	337.323	136.917	314.019	136.917
MPI-ESM_GLAC1D	-71.25	53.8103	-2.18053	1078.85	9.98918	-16.248	11.4435	-16.248	1010.28	137.986	46.5484	42.1721	398.85	139.948	391.832	139.948
MPI-ESM_GLAC1D	-67.5	53.8103	-2.36543	1048.67	11.0424	-15.9583	11.0424	-15.9583	1087.72	151.099	52.1329	39.9864	424.576	156.429	424.576	156.429
MPI-ESM_GLAC1D	-63.75	53.8103	-1.57669	960.488	10.7358	-13.8014	10.7358	-13.8014	1168.13	151.673	62.0906	33.2196	428.209	186.337	428.209	186.337
MPI-ESM_GLAC1D	-60	53.8103	0.0276403	817.958	10.3601	-10.0403	10.3601	-9.44787	1174.3	133.777	68.8606	25.8801	390.491	209.329	390.491	215.243
MPI-ESM_GLAC1D	-7.5	53.8103	10.3714	339.808	6.68532	14.6624	14.6624	6.42127	1098.92	104.624	77.4313	10.1836	313.142	250.138	250.138	306.595
MPI-ESM_GLAC1D	-3.75	53.8103	9.84388	377.14	14.5906	6.62008	14.5906	5.32687	1215.3	118.017	85.4934	9.87916	326.592	273.019	326.592	309.139
MPI-ESM_GLAC1D	0	50.0995	8.62611	401.798	3.8917	13.2691	13.7202	3.60942	1433.34	168.24	80.729	22.2239	471.643	279.963	291.393	443.936
MPI-ESM_GLAC1D	3.75	50.0995	7.23728	453.359	1.76084	10.5542	12.9799	1.50265	1505.7	166.257	93.9676	16.3435	460.147	322.55	346.185	433.303
MPI-ESM_GLAC1D	7.5	50.0995	6.44463	499.656	0.246515	9.94674	12.7032	0.0182739	1295.71	125.941	89.2267	9.31657	348.582	288.906	326.812	331.593
MPI-ESM_GLAC1D	11.25	50.0995	6.22751	535.556	9.24071	9.80156	12.8601	-0.761023	1067.46	115.287	76.3901	14.0793	323.261	231.301	274.65	243.17
MPI-ESM_GLAC1D	15	50.0995	6.1528	568.313	9.57404	9.77161	13.1323	-1.35282	1033.24	121.287	70.3027	19.3306	336.575	220.126	276.525	220.688
MPI-ESM_GLAC1D	18.75	50.0995	5.90655	610.104	12.3718	6.05896	13.3732	-2.23108	1100.07	120.02	72.186	18.3571	345.485	233.165	320.026	230.341
MPI-ESM_GLAC1D	22.5	50.0995	5.68389	666.301	12.6712	-3.31115	13.8152	-3.31115	1129.52	126.268	72.6591	20.9258	365.815	225.661	352.197	225.661
MPI-ESM_GLAC1D	26.25	50.0995	5.85837	735.43	13.4929	-4.22196	14.7644	-4.22196	1040.85	125.883	67.9667	22.5389	344.138	204.648	317.579	204.648
MPI-ESM_GLAC1D	30	50.0995	6.34649	818.832	11.4529	11.4617	16.1896	-4.9967	858.913	102.762	56.599	22.4522	291.908	175.542	222.809	184.683
MPI-ESM_GLAC1D	33.75	50.0995	7.04961	903.765	12.4067	12.8562	18.0047	-5.37235	766.393	85.9678	37.6113	24.1613	240.815	127.856	165.398	205.446
MPI-ESM_GLAC1D	37.5	50.0995	7.53122	968.682	-5.54227	18.538	19.4272	-5.54227	719.615	81.4885	22.9554	32.7053	220.955	92.3933	137.741	220.955
MPI-ESM_GLAC1D	41.25	50.0995	7.87204	1005.03	-5.53641	19.5842	20.2735	-5.53641	625.095	72.272	14.8911	36.9209	197.069	70.3437	120.562	197.069
MPI-ESM_GLAC1D	45	50.0995	8.28187	1039.71	-5.53251	20.5282	21.1056	-5.53251	494.08	57.5921	7.82426	40.5026	164.879	46.0593	83.4997	164.879
MPI-ESM_GLAC1D	48.75	50.0995	8.22149	1062.56	-5.9967	20.6363	21.1655	-5.9967	424.333	55.2199	4.8534	43.7918	154.8	36.3758	59.6341	154.8
MPI-ESM_GLAC1D	52.5	50.0995	7.46579	1092.84	-7.20959	20.1539	20.5978	-7.20959	419.253	60.2025	2.66236	52.2286	165.239	25.2641	51.41	165.239
MPI-ESM_GLAC1D	56.25	50.0995	6.51202	1125.18	-8.48108	19.5055	19.9864	-8.48108	438.401	65.888	2.55162	55.3959	180.339	24.8648	53.8386	180.339
MPI-ESM_GLAC1D	60	50.0995	6.20668	1141.35	-8.85347	19.2542	19.9428	-8.85347	392.749	62.2069	2.47057	57.8153	166.054	20.8808	49.8764	166.054
MPI-ESM_GLAC1D	63.75	50.0995	6.62318	1130.42	-8.25907	19.2919	20.3263	-8.25907	297.317	50.2949	2.05517	61.9027	131.769	13.2849	34.112	131.769
MPI-ESM_GLAC1D	67.5	50.0995	6.81345	1107.45	-7.77535	19.0361	20.2892	-7.77535	259.68	44.5221	2.56848	62.099	113.405	12.2783	26.3084	113.405
MPI-ESM_GLAC1D	71.25	50.0995	6.11911	1089.95	-7.79385	18.1962	19.4265	-8.26298	293.791	46.3112	3.28084	55.4745	125.218	19.1039	34.5443	114.856
MPI-ESM_GLAC1D	75	50.0995	4.74102	1082.24	-8.98786	16.9195	18.0105	-9.46219	368.095	48.5252	5.82906	44.5302	128.36	32.1647	54.7493	118.56
MPI-ESM_GLAC1D	78.75	50.0995	3.32452	1070.86	9.20881	15.5654	16.5411	-10.6061	418.333	45.9137	9.38249	34.8713	135.354	51.7524	87.8634	104.924
MPI-ESM_GLAC1D	82.5	50.0995	1.832	1059.04	7.37417	8.96106	15.0353	-11.7819	429.512	57.2718	10.9744	39.0906	161.605	53.3801	104.547	91.2401
MPI-ESM_GLAC1D	86.25	50.0995	-0.239938	1060.12	4.90542	12.1461	13.2234	-13.6184	445.773	64.7004	11.1188	43.8328	176.359	48.6174	89.3398	95.5161
MPI-ESM_GLAC1D	90	50.0995	-2.77005	1036.95	1.9855	4.36015	10.5157	-15.8326	528.575	80.9116	18.3635	39.6815	204.973	76.8197	124.242	103.426
MPI-ESM_GLAC1D	93.75	50.0995	-4.66328	1055.07	6.08531	-18.1204	8.81651	-18.1204	520.74	76.8913	24.1341	41.6826	213.183	74.8222	177.598	74.8222
MPI-ESM_GLAC1D	97.5	50.0995	-4.72171	1083.82	6.33922	-18.8001	8.92979	-18.8001	479.644	86.1845	13.2785	64.3567	233.052	42.7135	218.805	42.7135
MPI-ESM_GLAC1D	101.25	50.0995	-3.94436	1116.86	9.94998	-18.664	9.94998	-18.664	495.419	111.064	9.77488	80.7	275.55	32.8227	275.55	32.8227
MPI-ESM_GLAC1D	105	50.0995	-3.68379	1179.02	10.9578	-19.2526	10.9578	-19.2526	510.872	116.394	9.63664	83.2288	292.176	32.1449	292.176	32.1449
MPI-ESM_GLAC1D	108.75	50.0995	-4.16149	1240.73	11.3094	-20.4824	11.3094	-20.4824	572.354	118.446	10.9976	78.6024	316.505	36.5621	316.505	36.5621
MPI-ESM_GLAC1D	112.5	50.0995	-4.72073	1276.75	11.2221	-21.4895	11.2221	-21.4895	637.485	127.71	10.256	78.9708	348.756	34.8236	348.756	34.8236
MPI-ESM_GLAC1D	116.25	50.0995	-4.56692	1293.43	11.5737	-21.5162	11.5737	-21.5162	685.074	140.299	8.57781	83.008	379.876	28.9679	379.876	28.9679
MPI-ESM_GLAC1D	120	50.0995	-4.1151	1315.62	12.2957	-21.2252	12.2957	-21.2252	759.153	152.653	8.80434	82.1985	410.273	29.4425	410.273	29.4425
MPI-ESM_GLAC1D	123.75	50.0995	-4.31839	1372.99	12.7983	-21.9726	12.7983	-21.9726	836.616	157.663	10.062	79.3375	438.063	33.9644	438.063	33.9644
MPI-ESM_GLAC1D	127.5	50.0995	-5.41246	1442.92	12.5906	-23.722	12.5906	-23.722	914.072	164.357	12.7736	74.3683	456.438	42.3701	456.438	42.3701
MPI-ESM_GLAC1D	131.25	50.0995	-6.42044	1465.63	11.8536	-24.9127	11.8536	-24.9127	939.77	160.725	16.167	70.7287	455.175	51.6874	455.175	51.6874
MPI-ESM_GLAC1D	135	50.0995	-6.21862	1377.82	10.8959	-23.7259	10.8959	-23.7259	940.663	150.277	21.9264	64.0229	433.764	68.5454	433.764	68.5454
MPI-ESM_GLAC1D	138.75	50.0995	-4.82295	1195.46	9.6837	-19.7841	10.1148	-20.2688	912.91	127.581	25.5201	53.7018	377.252	80.8709	353.441	86.949
MPI-ESM_GLAC1D	-123.75	50.0995	1.54619	648.552	-6.18057	9.28475	9.96235	-6.06441	1515.02	212.1	37.9482	49.0712	588.616	156.713	159.073	581.02
MPI-ESM_GLAC1D	-120	50.0995	-1.43997	802.191	-11.1871	7.89152	9.00206	-10.7916	1027.72	124.594	42.5701	32.5674	360.707	144.974	190.475	355.881
MPI-ESM_GLAC1D	-116.25	50.0995	-1.82701	882.643	7.57034	-1.65328	9.28591	-12.3945	694.189	104.512	31.0948	37.7627	271.761	117.338	229.316	164.133
MPI-ESM_GLAC1D	-112.5	50.0995	-0.0332321	883.739	9.10289	-9.77009	10.8732	-11.0227	639.588	127.982	18.1792	71.381	330.255	70.3599	261.075	87.015
MPI-ESM_GLAC1D	-108.75	50.0995	2.24704	882.619	11.2878	-7.63467	12.9838	-9.07092	739.675	143.125	16.3256	73.7907	382.512	61.8389	316.348	76.6224
MPI-ESM_GLAC1D	-105	50.0995	3.96302	918.046	13.405	-8.52757	15.0522	-8.0299	777.42	148.637	19.9789	66.837	380.811	77.4885	325.826	85.9848
MPI-ESM_GLAC1D	-101.25	50.0995	4.46774	1000	14.8776	-9.14216	16.5157	-8.66076	737.186	133.683	24.5036	56.8226	337.087	88.0272	302.216	96.3836
MPI-ESM_GLAC1D	-97.5	50.0995	3.94268	1097.84	15.4382	-10.9071	17.1329	-10.4902	727.155	121.599	29.5283	48.2325	307.495	101.285	295.412	107.96
MPI-ESM_GLAC1D	-93.75	50.0995	3.09942	1178.42	17.269	-12.6031	17.269	-12.345	769.582	110.555	36.4495	39.9178	296.47	118.07	296.47	122.866
MPI-ESM_GLAC1D	-90	50.0995	2.48907	1209.98	17.1453	-13.2502	17.1453	-13.2623	814.605	104.391	44.5129	33.1824	295.23	133.973	295.23	137.786
MPI-ESM_GLAC1D	-86.25	50.0995	2.07956	1182.45	16.407	-12.9215	16.407	-13.2981	850.733	105.401	49.8038	30.6986	301.836	149.422	301.836	151.77
MPI-ESM_GLAC1D	-82.5	50.0995	1.76787	1141.18	14.4736	-13.0612	15.586	-13.0612	865.27	107.948	52.5244	29.2992	308.704	158.224	300.562	158.224
MPI-ESM_GLAC1D	-78.75	50.0995	1.14271	1099.41	13.3928	-13.235	14.3836	-13.235	931.059	116.079	54.6002	30.2531	332.652	164.032	325.796	164.032
MPI-ESM_GLAC1D	-75	50.0995	0.474418	1086.87	12.482	-13.8372	13.5906	-13.8372	1052.48	136.656	57.1201	32.4424	377.844	172.815	376.173	172.815
MPI-ESM_GLAC1D	-71.25	50.0995	-0.035999	1069.83	12.9929	-14.1445	12.9929	-14.1445	1175.86	154.53	60.337	34.7345	430.496	182.8	430.496	182.8
MPI-ESM_GLAC1D	-67.5	50.0995	0.0946976	1017.28	12.6707	-13.1803	12.6707	-13.1803	1270.19	169.21	65.5245	35.3449	475.164	198.138	475.164	198.138
MPI-ESM_GLAC1D	-3.75	50.0995	10.1393	361.003	6.01865	14.4371	14.685	5.72596	1071.91	125.483	56.7971	23.5132	353.398	194.748	205.794	331.166
MPI-ESM_GLAC1D	0	46.3886	9.54489	431.254	4.46879	14.8661	15.1375	4.46879	1102.31	136.58	49.1137	29.8988	352.628	173.994	195.846	352.628
MPI-ESM_GLAC1D	3.75	46.3886	8.29489	446.917	3.11435	11.7937	14.129	2.88546	1206.07	127.083	66.7813	16.2922	348.238	233.369	278.16	331.464
MPI-ESM_GLAC1D	7.5	46.3886	7.79668	498.326	6.5646	11.4799	14.284	1.64262	1042.12	106.173	67.0562	13.3923	296.309	217.045	233.935	264.572
MPI-ESM_GLAC1D	11.25	46.3886	7.48695	569.095	6.59259	14.0061	14.8406	0.327519	926.454	106.682	44.7815	25.6735	296.369	147.372	163.853	244.435
MPI-ESM_GLAC1D	15	46.3886	6.8849	633.139	6.37124	14.0133	15.017	-1.1829	1021.05	117.46	50.9049	26.1209	329.041	161.451	183.664	271.567
MPI-ESM_GLAC1D	18.75	46.3886	6.25941	676.524	9.81493	10.6538	14.9011	-2.46154	1160.91	124.187	74.0443	16.6853	358.398	233.293	280.87	276.774
MPI-ESM_GLAC1D	22.5	46.3886	6.53008	703.45	10.1717	6.56938	15.4311	-2.66923	1082.45	133.42	61.0098	25.7577	371.111	206.087	329.826	214.864
MPI-ESM_GLAC1D	26.25	46.3886	8.22002	737.158	11.9809	8.46782	17.4311	-1.56962	800.369	113.002	39.0772	36.898	312.93	134.139	236.512	149.583
MPI-ESM_GLAC1D	30	46.3886	10.7203	803.506	14.7563	19.926	20.8041	0.0638468	484.053	71.641	7.64687	50.2281	198.205	42.5641	88.5558	130.608
MPI-ESM_GLAC1D	33.75	46.3886	11.9837	863.794	0.688847	22.0217	22.9519	0.688847	412.839	53.2431	1.57792	58.2938	155.503	14.0396	42.2712	155.503
MPI-ESM_GLAC1D	37.5	46.3886	11.6606	926.512	-0.126257	22.8557	23.5978	-0.126257	515.856	76.715	1.43825	63.9486	225.261	14.0963	42.5553	225.261
MPI-ESM_GLAC1D	41.25	46.3886	10.8504	961.276	-1.17248	22.9039	23.2429	-1.17248	596.346	76.2652	3.98538	54.6538	224.561	27.5495	70.9709	224.561
MPI-ESM_GLAC1D	45	46.3886	11.2256	969.337	9.57046	23.2542	23.6245	-1.01428	402.585	52.7068	5.83551	45.8599	146.054	31.8769	51.6353	131.962
MPI-ESM_GLAC1D	56.25	46.3886	12.3725	1120.96	-2.14709	25.2594	26.2983	-2.14709	133.933	28.0399	0.31363	80.6414	77.6615	3.39173	4.702	77.6615
MPI-ESM_GLAC1D	60	46.3886	12.0304	1187.28	-3.20503	25.3759	26.8562	-3.20503	157.279	36.7906	0.139332	95.4599	99.7119	1.34584	2.88879	99.7119
MPI-ESM_GLAC1D	63.75	46.3886	11.6113	1181.15	-3.54943	24.6669	26.3543	-3.54943	176.64	40.6496	0.342371	95.4745	109.272	1.5216	3.15704	109.272
MPI-ESM_GLAC1D	67.5	46.3886	10.3673	1115.61	-4.00972	22.7476	24.3289	-4.00972	221.538	42.8114	0.328265	80.8132	114.569	2.42711	6.143	114.569
MPI-ESM_GLAC1D	71.25	46.3886	7.9819	1062.88	-5.72782	20.0927	21.3653	-5.72782	322.41	49.5517	0.628278	68.4958	132.354	5.81722	15.1099	132.354
MPI-ESM_GLAC1D	75	46.3886	5.31882	1058.5	-1.29724	17.5335	18.6388	-8.32743	334.86	50.1932	0.812609	65.9699	138.089	5.86203	17.2324	121.881
MPI-ESM_GLAC1D	78.75	46.3886	3.76169	1087.47	3.50015	16.1871	17.4272	-10.2356	266.689	44.0935	1.46869	64.7963	118.787	6.96428	17.6376	82.2629
MPI-ESM_GLAC1D	82.5	46.3886	3.07126	1130.95	3.0978	15.7131	17.2039	-11.5891	178.22	32.2276	1.42984	64.996	84.2339	6.57001	14.4252	50.0037
MPI-ESM_GLAC1D	86.25	46.3886	1.70277	1156.67	-5.41117	14.5139	16.2136	-13.194	155.953	27.621	0.658943	65.6954	72.123	4.50062	8.89887	49.414
MPI-ESM_GLAC1D	90	46.3886	-0.211129	1182.36	-7.63708	12.9716	14.7846	-15.2265	187.578	34.2158	1.10817	66.957	86.5192	5.75287	11.0176	61.8842
MPI-ESM_GLAC1D	93.75	46.3886	-1.44339	1202.42	-8.84737	5.82434	13.8777	-16.6803	200.958	35.3291	4.21275	50.8009	83.949	19.4753	30.3373	54.0111
MPI-ESM_GLAC1D	97.5	46.3886	-0.8415	1217.7	14.4819	-13.9218	14.4819	-16.569	177.698	29.7586	6.23473	49.0568	68.0608	23.9124	68.0608	25.0561
MPI-ESM_GLAC1D	101.25	46.3886	0.610323	1228	15.7866	-15.7209	15.7866	-15.6048	208.592	51.2321	4.96712	82.5932	118.107	14.9685	118.107	17.3529
MPI-ESM_GLAC1D	105	46.3886	1.05026	1257.52	16.4337	-15.8635	16.4337	-15.7513	221.5	55.853	5.13629	90.4497	133.889	15.5845	133.889	17.6502
MPI-ESM_GLAC1D	108.75	46.3886	0.0697952	1279.7	15.7286	-17.1246	15.7286	-16.9947	342.885	87.1369	7.11519	92.0015	206.398	21.8636	206.398	24.8669
MPI-ESM_GLAC1D	112.5	46.3886	-1.03811	1273.82	14.5958	-18.1037	14.5958	-17.9518	543.563	124.494	9.82527	86.6851	315.712	29.7974	315.712	34.0848
MPI-ESM_GLAC1D	116.25	46.3886	-1.17093	1263.68	14.3445	-18.0224	14.3445	-17.9134	717.389	157.486	10.5977	86.2825	410.254	31.8929	410.254	35.9383
MPI-ESM_GLAC1D	120	46.3886	-0.888864	1288.05	14.8888	-17.9388	14.8888	-17.9388	825.69	171.507	12.2366	81.8749	449.746	41.1452	449.746	41.1452
MPI-ESM_GLAC1D	123.75	46.3886	-1.22122	1352.79	15.2918	-19.0774	15.2918	-19.0774	909.978	176.844	16.4019	74.738	462.908	54.9352	462.908	54.9352
MPI-ESM_GLAC1D	127.5	46.3886	-2.22301	1410.94	11.6888	-20.7356	14.9467	-20.7356	1024.92	183.985	18.3301	70.6672	499.287	60.9926	493.427	60.9926
MPI-ESM_GLAC1D	131.25	46.3886	-2.55862	1390.05	10.6543	-20.6126	14.2924	-20.6126	1056.26	179.173	19.1625	68.9808	507.32	63.7799	495.683	63.7799
MPI-ESM_GLAC1D	135	46.3886	-1.57994	1273.91	9.71747	-17.9694	13.7646	-17.9694	972.412	155.654	18.7432	65.9672	451.237	62.0104	375.225	62.0104
MPI-ESM_GLAC1D	-123.75	46.3886	5.39678	604.653	-1.99177	13.1051	13.1051	-1.88602	1243.08	196.088	7.02048	70.4619	571.364	36.4132	36.4132	564.674
MPI-ESM_GLAC1D	-120	46.3886	1.96661	826.928	-7.53837	12.4664	12.4962	-7.53837	928.315	141.592	8.06906	62.1493	407.65	37.2197	67.2892	407.65
MPI-ESM_GLAC1D	-116.25	46.3886	0.43503	942.047	3.78758	12.1558	12.3992	-10.4335	614.916	82.0398	8.77424	48.0281	212.778	46.771	107.48	209.102
MPI-ESM_GLAC1D	-112.5	46.3886	1.2612	965.499	5.33771	8.51705	13.4506	-10.164	468.191	100.18	9.87268	72.2463	247.599	39.4445	138.618	87.6066
MPI-ESM_GLAC1D	-108.75	46.3886	2.95456	913.677	11.6491	-7.23688	14.4213	-7.99996	614.935	128.451	16.9939	72.7457	312.225	58.3231	242.859	68.0853
MPI-ESM_GLAC1D	-105	46.3886	4.25225	880.208	12.8614	-7.34398	15.1909	-6.59436	803.188	144.178	22.6979	64.6111	375.913	79.8868	322.276	85.6426
MPI-ESM_GLAC1D	-101.25	46.3886	4.84665	902.997	9.95685	-7.16559	15.9995	-6.51493	891.737	146.552	31.0283	54.1183	388.839	98.9375	316.548	108.24
MPI-ESM_GLAC1D	-97.5	46.3886	5.19984	975.298	15.0508	-7.77562	17.1655	-7.24605	1019.22	146.187	37.4239	47.204	407.153	116.799	364.966	128.131
MPI-ESM_GLAC1D	-93.75	46.3886	5.37351	1045.56	15.9239	-8.45661	18.1466	-8.06636	1033.89	135.185	45.027	38.9948	385.297	138.447	360.693	148.907
MPI-ESM_GLAC1D	-90	46.3886	5.41062	1093.09	16.3867	-8.92796	18.6948	-8.67704	1027.25	127.675	53.8371	30.6177	357.484	167.83	342.752	177.151
MPI-ESM_GLAC1D	-86.25	46.3886	4.90036	1106.69	18.3028	-9.43252	18.3028	-9.34175	1090.86	129.382	63.2117	25.4889	362.243	198.145	362.243	205.971
MPI-ESM_GLAC1D	-82.5	46.3886	3.9933	1099.73	17.239	-10.1259	17.239	-10.1901	1146.38	136.534	67.4655	26.8548	393.356	205.282	393.356	211.298
MPI-ESM_GLAC1D	-78.75	46.3886	3.24688	1095.86	16.3575	-10.831	16.3575	-10.9928	1141.63	139.789	65.5716	27.9088	396.022	198.277	396.022	204.363
MPI-ESM_GLAC1D	-75	46.3886	2.89304	1089.26	13.7904	-11.1793	15.8751	-11.3724	1153.25	137.313	67.037	26.0185	391.447	203.748	384.75	210.411
MPI-ESM_GLAC1D	-71.25	46.3886	3.0781	1067.45	13.6966	-10.6545	15.8465	-10.9095	1251.69	146.392	74.6969	24.0704	419.775	229.56	408.514	237.601
MPI-ESM_GLAC1D	-67.5	46.3886	3.70424	997.741	15.7989	-8.81729	15.7989	-9.23759	1418.66	176.53	78.0063	26.5088	483.223	252.472	483.223	266.839
MPI-ESM_GLAC1D	-63.75	46.3886	4.96384	882.313	15.8139	-6.19201	15.8139	-6.19201	1505.91	185.322	82.791	26.158	520.257	286.574	520.257	286.574
MPI-ESM_GLAC1D	0	42.6776	12.116	539.946	9.4064	16.9396	19.1884	6.12635	713.797	77.394	36.3317	21.7646	220.425	121.659	140.425	186.848
MPI-ESM_GLAC1D	11.25	42.6776	14.026	675.196	12.0268	22.4364	23.0294	6.11853	462.925	68.8428	12.1888	43.4065	175.588	49.4321	55.2006	136.381
MPI-ESM_GLAC1D	15	42.6776	13.1403	787.379	3.85747	22.8336	23.6472	3.85747	518.701	73.4953	2.03865	63.0692	204.133	15.0376	27.5735	204.133
MPI-ESM_GLAC1D	18.75	42.6776	11.6663	872.277	1.35551	22.5107	23.2814	1.35551	648.116	90.6751	3.57942	58.5947	245.267	26.774	43.179	245.267
MPI-ESM_GLAC1D	22.5	42.6776	11.1253	902.682	5.32711	22.4117	23.0379	0.30343	607.684	84.0831	3.64772	55.0824	222.631	28.261	58.9134	209.756
MPI-ESM_GLAC1D	26.25	42.6776	12.2669	873.313	10.6785	23.01	23.6935	1.56059	486.862	65.4523	7.37232	49.2586	182.529	35.3762	51.884	157.164
MPI-ESM_GLAC1D	41.25	42.6776	9.98125	955.071	7.50991	22.5152	22.6114	-1.30399	727.7	104.65	3.26047	56.783	284.932	33.104	76.7978	248.68
MPI-ESM_GLAC1D	45	42.6776	11.1307	941.983	8.83088	23.2314	23.5418	-0.167924	412.511	76.7368	4.24394	62.9455	197.912	35.2733	47.7534	88.7921
MPI-ESM_GLAC1D	52.5	42.6776	16.6894	893.217	5.22465	27.9858	27.9858	5.22465	38.4572	8.30846	0.00211224	74.743	23.9025	0.11259	0.11259	23.9025
MPI-ESM_GLAC1D	56.25	42.6776	17.1539	1000.28	4.40955	28.3401	29.7827	4.40955	25.9919	7.40736	0.00158418	87.5162	20.0264	0.0522779	0.0603497	20.0264
MPI-ESM_GLAC1D	60	42.6776	16.1585	1119.59	1.94666	28.3648	30.2117	1.94666	63.5461	18.9807	0.00512972	110.44	50.396	0.0642347	0.100105	50.396
MPI-ESM_GLAC1D	63.75	42.6776	13.5965	1145.02	-0.988888	27.92	27.92	-0.988888	194.799	49.1486	0.00761915	107.063	133.957	0.330415	0.330415	133.957
MPI-ESM_GLAC1D	67.5	42.6776	9.78773	1101.39	-4.45503	22.2535	23.575	-4.45503	365.267	67.5307	0.0840747	90.2225	196.402	0.77953	1.75489	196.402
MPI-ESM_GLAC1D	71.25	42.6776	5.37351	1064.14	-1.69242	17.8798	18.7163	-8.32483	414.8	79.7084	0.310009	81.9255	208.692	1.80185	8.59252	163.689
MPI-ESM_GLAC1D	75	42.6776	2.5265	1055.24	1.37059	15.0439	15.8842	-10.8906	379.559	87.2108	0.911243	82.7063	203.631	4.5475	19.6566	112.252
MPI-ESM_GLAC1D	78.75	42.6776	2.5475	1072.35	2.24299	14.8622	16.0945	-11.2474	246.206	62.1692	1.31906	89.2279	147.778	6.45274	20.5944	55.5247
MPI-ESM_GLAC1D	82.5	42.6776	4.04213	1098.56	4.70132	16.0829	17.7449	-10.2766	168.039	40.4212	0.719293	86.7315	96.9526	3.65304	10.8268	47.2841
MPI-ESM_GLAC1D	86.25	42.6776	4.3626	1123.27	-1.53096	16.4924	18.4064	-10.2467	106.685	24.164	0.22831	81.7678	60.6906	1.60489	3.96037	37.1127
MPI-ESM_GLAC1D	90	42.6776	2.67266	1163.12	-3.81482	15.4983	17.4982	-12.2096	118.521	27.0128	0.767271	85.0467	68.7681	2.68575	3.50141	42.9355
MPI-ESM_GLAC1D	93.75	42.6776	0.920544	1203.58	-6.06872	7.81849	16.4877	-14.1744	176.319	37.337	3.29498	73.5176	93.3587	13.426	15.6796	54.4024
MPI-ESM_GLAC1D	97.5	42.6776	1.42038	1220.01	-5.26924	-11.7844	17.0424	-14.0208	156.448	22.3216	5.09707	47.7443	56.3906	22.1071	53.202	28.1441
MPI-ESM_GLAC1D	101.25	42.6776	3.20196	1213.47	16.023	-12.8967	18.312	-12.567	180.554	42.2374	4.16077	81.6026	101.535	13.9023	99.2546	17.7129
MPI-ESM_GLAC1D	105	42.6776	4.14271	1214.37	16.5432	-12.4065	18.8282	-12.0664	216.288	55.8841	3.32654	101.567	138.99	11.0294	136.634	13.6996
MPI-ESM_GLAC1D	108.75	42.6776	3.36016	1210.5	15.551	-13.4182	17.7781	-13.0475	377.912	99.8298	4.30806	109.495	249.919	13.4846	247.717	16.2657
MPI-ESM_GLAC1D	112.5	42.6776	2.32386	1187.32	16.3953	-14.314	16.3953	-13.871	658.471	162.967	6.57461	103.681	418.491	20.8689	418.491	24.5952
MPI-ESM_GLAC1D	116.25	42.6776	2.58623	1167.79	16.5522	-13.6981	16.5522	-13.278	885.205	205.815	8.49173	96.0296	533.825	26.1794	533.825	31.1787
MPI-ESM_GLAC1D	120	42.6776	3.02829	1198.11	17.3582	-13.2988	17.3582	-13.2988	918.302	212.353	11.0796	89.2638	530.968	38.4286	530.968	38.4286
MPI-ESM_GLAC1D	123.75	42.6776	2.74802	1254.43	17.7091	-14.4088	17.7091	-14.4088	914.892	203.723	14.3253	81.9825	502.931	48.6733	502.931	48.6733
MPI-ESM_GLAC1D	127.5	42.6776	2.235	1265.34	17.3191	-14.9974	17.3191	-14.9974	1052.11	222.905	18.9358	78.1758	552.354	64.9578	552.354	64.9578
MPI-ESM_GLAC1D	131.25	42.6776	2.96189	1183.15	13.722	-12.9179	17.034	-12.9179	1023.64	196.66	16.5753	76.1013	517.034	54.3508	516.983	54.3508
MPI-ESM_GLAC1D	-123.75	42.6776	8.40931	670.75	1.72596	17.3635	17.3635	0.677128	971.001	171.425	0.469483	85.2945	487.324	4.43883	4.43883	502.332
MPI-ESM_GLAC1D	-120	42.6776	5.24672	914.796	-5.41076	17.1454	17.1454	-5.41076	749.991	129.526	0.370359	81.0761	376.793	4.7158	4.7158	376.793
MPI-ESM_GLAC1D	-116.25	42.6776	2.98451	1057.57	-7.68029	16.6044	16.6044	-9.17574	513.593	73.763	0.0456017	68.9213	215.514	5.75702	5.75702	214.081
MPI-ESM_GLAC1D	-112.5	42.6776	2.88376	1098.62	0.667464	16.8245	16.9259	-9.81766	378.838	74.0748	0.556726	74.0296	188.855	7.2474	46.1296	108.365
MPI-ESM_GLAC1D	-108.75	42.6776	4.27178	1069.48	8.52	4.3604	17.9539	-8.08199	359.554	74.37	8.71657	64.6646	174.68	39.1382	103.854	52.376
MPI-ESM_GLAC1D	-105	42.6776	5.86	1010.11	15.4115	-5.95503	18.6043	-5.95503	737.322	134.799	18.0931	69.6555	359.635	65.115	336.075	65.115
MPI-ESM_GLAC1D	-101.25	42.6776	7.15964	978.382	16.3295	-4.47912	19.4259	-4.47912	962.028	153.547	25.939	60.6261	438.16	91.0591	392.167	91.0591
MPI-ESM_GLAC1D	-97.5	42.6776	8.09274	986.479	12.7238	-3.95178	20.3868	-3.95178	1138.39	177.019	36.0259	50.6932	465.071	123.883	396.794	123.883
MPI-ESM_GLAC1D	-93.75	42.6776	8.78643	1014.02	13.5382	-4.40322	21.3517	-3.8398	1044.74	142.182	47.1423	35.95	386.012	146.562	303.625	159.558
MPI-ESM_GLAC1D	-90	42.6776	8.73711	1027.22	13.744	-4.6669	21.3393	-4.26037	1037.01	124.482	59.3318	26.6008	355.058	191.019	287.359	205.249
MPI-ESM_GLAC1D	-86.25	42.6776	7.67868	1021.5	13.0037	-3.49665	20.047	-5.44592	1223.31	140.348	72.9318	24.1398	408.703	234.427	348.707	261.994
MPI-ESM_GLAC1D	-82.5	42.6776	6.27439	1014.06	11.6645	-4.78246	18.42	-6.84761	1349.89	148.051	81.8114	22.6766	437.379	258.022	394.046	285.315
MPI-ESM_GLAC1D	-78.75	42.6776	5.81394	998.762	11.0825	-7.46703	17.7247	-7.15946	1279.41	143.437	71.2076	25.3791	422.727	234.721	387.131	253.274
MPI-ESM_GLAC1D	-75	42.6776	6.62611	977.745	11.5975	-6.34007	18.2957	-6.06115	1156.89	136.75	62.0137	29.0511	401.649	207.924	352.731	226.447
MPI-ESM_GLAC1D	-71.25	42.6776	7.97165	924.396	16.8073	-4.08226	19.1134	-3.90816	1187.22	144.212	66.1396	28.7339	415.312	222.006	373.888	240.291
MPI-ESM_GLAC1D	-7.5	42.6776	14.055	514.205	8.49939	20.9338	20.9338	8.49939	769.966	121.783	10.0186	62.8046	319.649	39.9239	39.9239	319.649
MPI-ESM_GLAC1D	-3.75	42.6776	12.8598	568.865	6.70903	20.3896	20.3896	6.70903	762.431	107.471	13.2457	53.9288	281.374	51.5521	51.5521	281.374
MPI-ESM_GLAC1D	15	38.9666	19.0687	715.316	16.9682	28.6043	28.6043	10.6687	279.206	49.6215	1.80272	54.4057	115.266	21.2374	21.2374	81.7546
MPI-ESM_GLAC1D	22.5	38.9666	16.296	886.051	10.2542	27.4254	28.0366	5.77609	302.14	45.8517	0.89608	58.3902	116.744	15.1177	18.7074	112.087
MPI-ESM_GLAC1D	30	38.9666	16.1181	813.401	6.27674	26.2236	26.81	6.27674	414.119	72.4268	0.251394	73.4417	193.587	5.63289	15.5336	193.587
MPI-ESM_GLAC1D	33.75	38.9666	14.7719	839.457	4.70447	25.2652	25.8758	4.70447	511.724	113.227	0.042622	93.5758	286.001	2.42364	4.86294	286.001
MPI-ESM_GLAC1D	37.5	38.9666	11.9329	976.63	0.389368	24.4234	24.9435	0.389368	639.25	139.652	0.0365493	93.4745	355.574	1.77805	8.47898	355.574
MPI-ESM_GLAC1D	41.25	38.9666	9.9072	1104.46	-3.33134	24.0009	24.5066	-3.33134	518.664	85.9071	0.0426974	78.6086	228.473	1.62808	17.4263	228.473
MPI-ESM_GLAC1D	45	38.9666	11.3499	1096.92	9.54832	24.9488	25.7247	-1.94787	234.95	49.1183	0.164151	81.5407	128.286	4.78716	8.03202	73.3815
MPI-ESM_GLAC1D	48.75	38.9666	14.5923	995.663	13.5919	27.3777	27.3777	2.15564	175.496	36.8865	0.0851685	74.8708	88.2148	2.37238	2.37238	47.792
MPI-ESM_GLAC1D	56.25	38.9666	17.004	909.368	5.26632	26.7633	28.2495	5.26632	52.4468	12.7301	4.63078e-12	89.1161	34.7476	0.00750599	0.0121831	34.7476
MPI-ESM_GLAC1D	60	38.9666	15.283	969.848	2.70708	25.5185	27.1388	2.70708	90.6963	23.7988	4.63078e-12	104.367	66.0782	0.0136541	0.0169734	66.0782
MPI-ESM_GLAC1D	63.75	38.9666	11.722	1010.49	-1.48954	24.1082	24.1082	-1.48954	258.35	56.4312	0.000452623	101.049	163.23	0.0697793	0.0697793	163.23
MPI-ESM_GLAC1D	67.5	38.9666	6.24395	1040.85	-0.530961	18.1604	19.0034	-7.51037	427.757	76.432	0.00418676	91.8313	223.205	0.104028	1.05325	210.405
MPI-ESM_GLAC1D	71.25	38.9666	0.716768	1051.94	-6.97107	13.3726	13.8979	-12.6386	451.924	94.8579	0.0403211	89.562	251.383	0.41943	7.98841	171.599
MPI-ESM_GLAC1D	75	38.9666	-2.25312	1063.48	-4.52459	10.8967	11.4539	-15.375	430.158	92.434	0.183161	83.5317	237.894	5.22379	35.6835	119.331
MPI-ESM_GLAC1D	78.75	38.9666	-1.66165	1083	-3.12811	11.5367	12.3764	-15.1022	284.217	64.9084	0.981098	89.0848	164.418	7.4696	43.5923	56.3319
MPI-ESM_GLAC1D	82.5	38.9666	0.642386	1090.51	-0.0219889	13.6279	14.7631	-13.0716	262.055	57.2594	1.22072	82.7207	144.78	8.10489	41.9456	52.9604
MPI-ESM_GLAC1D	86.25	38.9666	1.87058	1095.53	1.41616	14.7346	16.0821	-11.9199	197.708	41.539	0.723367	82.2109	111.75	3.46117	12.1386	55.0898
MPI-ESM_GLAC1D	90	38.9666	0.631807	1101.68	-6.12276	13.691	15.062	-12.8977	244.805	61.6352	1.44677	93.1628	143.819	5.09155	9.68036	70.0395
MPI-ESM_GLAC1D	93.75	38.9666	-1.29088	1100.52	-2.72251	6.03007	13.198	-14.5651	354.725	80.4792	6.66332	77.3484	190.052	24.0565	34.5324	93.6077
MPI-ESM_GLAC1D	97.5	38.9666	-1.10924	1083.66	-1.55129	-14.814	12.8764	-14.5501	378.953	65.1041	13.4214	48.3392	155.373	43.6666	108.167	55.3384
MPI-ESM_GLAC1D	101.25	38.9666	1.1655	1042.42	12.4644	-12.7261	14.1062	-12.2324	536.567	99.7955	7.75946	71.782	269.019	26.4901	266.876	36.0791
MPI-ESM_GLAC1D	105	38.9666	3.568	1035.6	14.3258	-10.6526	15.9825	-10.2005	664.939	130.171	8.04398	82.408	359.675	28.0316	351.733	36.1445
MPI-ESM_GLAC1D	108.75	38.9666	4.80287	1036.35	16.9539	-9.75934	16.9539	-9.36649	866.547	163.225	10.4217	83.8481	462.791	33.7558	462.791	41.2135
MPI-ESM_GLAC1D	112.5	38.9666	5.75404	1022.04	17.7924	-8.78408	17.7924	-8.33785	1132.52	212.637	14.8558	82.4713	604.514	46.301	604.514	53.9778
MPI-ESM_GLAC1D	116.25	38.9666	7.23549	1000.47	19.0346	-7.08617	19.0346	-6.67964	1171.78	237.139	15.3191	83.783	646.398	46.9464	646.398	53.8054
MPI-ESM_GLAC1D	120	38.9666	8.4142	1004.99	20.325	-5.58199	20.325	-5.58199	947.804	194.933	14.8354	80.5507	521.058	49.3179	521.058	49.3179
MPI-ESM_GLAC1D	127.5	38.9666	8.27129	1018.76	20.3673	-5.79943	20.4286	-5.79943	1027.52	214.687	15.5455	84.8892	577.585	51.4614	457.905	51.4614
MPI-ESM_GLAC1D	-123.75	38.9666	12.0929	674.315	5.46554	21.0803	21.0803	4.51762	572.133	111.033	0.0185575	98.354	324.805	0.234534	0.234534	328.263
MPI-ESM_GLAC1D	-120	38.9666	9.91794	908.022	0.994836	21.6832	21.6832	-0.535763	502.143	96.0546	3.77186e-05	97.3032	283.252	1.78017	1.78017	282.809
MPI-ESM_GLAC1D	-116.25	38.9666	7.06524	1083.2	-3.76949	20.8497	20.8497	-5.65881	407.656	76.0711	0.00275346	88.7832	217.225	2.9898	2.9898	211.853
MPI-ESM_GLAC1D	-112.5	38.9666	5.42819	1168.61	-6.2773	20.4695	20.4695	-8.17509	350.028	66.0983	0.0491096	78.3116	172.638	4.19415	4.19415	157.036
MPI-ESM_GLAC1D	-108.75	38.9666	6.5807	1179.33	-0.945024	21.9109	21.9109	-6.92639	230.058	41.0148	1.94556	60.6046	104.87	10.6197	10.6197	77.8849
MPI-ESM_GLAC1D	-105	38.9666	9.27878	1160.32	7.6909	-4.82054	24.3334	-3.96545	355.296	44.0517	18.8969	28.4299	124.711	58.3608	90.0679	65.0003
MPI-ESM_GLAC1D	-101.25	38.9666	12.0711	1124.73	16.7264	-0.94071	26.4799	-0.94071	676.805	105.162	25.5106	44.6192	270.36	89.1629	221.28	89.1629
MPI-ESM_GLAC1D	-97.5	38.9666	13.6282	1094.55	17.9093	-0.241115	27.4923	0.738977	876.582	134.289	39.2585	40.2028	346.062	119.509	236.29	130.424
MPI-ESM_GLAC1D	-93.75	38.9666	13.5978	1074.87	12.2801	-0.142157	27.0541	0.675826	942.155	125.292	57.837	29.1726	342.037	176.136	215.925	186.852
MPI-ESM_GLAC1D	-90	38.9666	12.277	1031.45	11.4337	12.9086	24.9194	-0.440059	1044.04	123.368	60.6074	24.3809	348.239	189.33	274.91	239.915
MPI-ESM_GLAC1D	-86.25	38.9666	10.5604	985.238	10.3166	11.1768	22.3777	-1.86259	1116.7	123.24	53.7569	27.2353	357.942	178.561	329.521	264.707
MPI-ESM_GLAC1D	-82.5	38.9666	9.57891	939.243	9.4116	10.4248	20.6915	-2.38863	1219.41	140.231	57.8416	28.7708	401.36	189.373	355.049	291.128
MPI-ESM_GLAC1D	-78.75	38.9666	10.1461	869.412	14.4158	0.286554	20.4422	-0.947221	1217.84	143.42	63.0381	29.0562	412.852	221.341	345.495	273.515
MPI-ESM_GLAC1D	-7.5	38.9666	15.6819	592.036	9.27609	23.6767	23.6767	9.27609	482.095	74.3789	4.10733	62.3296	206.444	25.2687	25.2687	206.444
MPI-ESM_GLAC1D	-3.75	38.9666	14.5936	663.363	8.07426	23.3505	23.3505	7.30929	477.27	61.6334	12.567	46.8428	175.978	45.1942	45.1942	169.871
MPI-ESM_GLAC1D	0	35.2556	16.9481	738.709	11.7464	26.8315	26.8315	8.34445	103.218	17.2782	0.544354	56.622	46.8549	6.51709	6.51709	35.7704
MPI-ESM_GLAC1D	3.75	35.2556	18.0452	692.874	16.2417	27.3054	27.3054	9.80994	75.3207	14.2914	0.265991	54.3635	34.2322	4.90194	4.90194	22.0606
MPI-ESM_GLAC1D	7.5	35.2556	18.9179	648.633	17.243	27.4929	27.4929	11.0762	65.1187	11.9681	0.181087	54.6972	29.2224	3.06441	3.06441	18.8453
MPI-ESM_GLAC1D	37.5	35.2556	15.2623	986.536	2.90564	27.1266	28.0099	2.90564	246.714	66.2786	0.00226311	113.651	170.156	0.258712	0.595765	170.156
MPI-ESM_GLAC1D	41.25	35.2556	13.9754	1177.38	-0.803341	27.9137	29.0906	-0.803341	150.767	40.027	0.000113156	111.183	107.456	0.0311933	0.0479403	107.456
MPI-ESM_GLAC1D	45	35.2556	14.6528	1221.05	-0.820919	28.7118	30.1101	-0.820919	79.6875	19.0582	0.000301749	93.5701	51.8461	0.00245171	0.01984	51.8461
MPI-ESM_GLAC1D	48.75	35.2556	15.5228	1133.53	9.2555	28.1585	29.6095	0.899784	71.8187	12.9897	0.00026403	82.5218	37.5479	0.0248188	0.0599725	36.9993
MPI-ESM_GLAC1D	52.5	35.2556	14.9586	1030.93	9.19039	26.1194	27.4871	1.39002	94.3734	18.4305	7.54371e-05	87.2936	52.5527	0.00433763	0.0535604	45.4679
MPI-ESM_GLAC1D	56.25	35.2556	13.8325	988.53	3.51958	24.2542	25.5704	0.63481	84.5938	15.9211	4.63078e-12	87.9892	46.3491	0.00196137	0.0258372	45.9997
MPI-ESM_GLAC1D	60	35.2556	13.0701	996.819	2.7227	23.4599	24.7482	-0.352169	90.7374	18.9669	4.3583e-12	92.0021	52.2349	0.00120699	0.0099577	54.7853
MPI-ESM_GLAC1D	63.75	35.2556	11.2249	1018.55	0.511764	22.0699	23.2534	-2.54748	116.911	24.4636	4.3583e-12	94.5363	65.7336	0.00158418	0.0022254	62.8001
MPI-ESM_GLAC1D	67.5	35.2556	7.36797	1052.09	0.995081	19.0439	20.0678	-6.78576	196.614	43.5228	4.63078e-12	97.7075	113.912	0.018633	0.0893176	89.107
MPI-ESM_GLAC1D	71.25	35.2556	2.65899	1103.28	-4.87666	15.3876	16.2319	-11.8209	299.191	69.817	0.00282889	98.6358	176.633	0.179767	0.922219	130.782
MPI-ESM_GLAC1D	75	35.2556	-1.16849	1114.66	-9.31872	12.4124	13.0821	-14.9492	423.907	92.563	0.0873185	92.8747	244.969	1.84349	7.27878	179.707
MPI-ESM_GLAC1D	78.75	35.2556	-3.43753	1138.09	-11.6351	10.8674	11.5105	-17.1471	431.781	83.7823	0.800237	81.232	229.271	6.72183	23.2474	156.177
MPI-ESM_GLAC1D	82.5	35.2556	-4.22138	1155.57	-7.20298	4.57044	10.9929	-18.0944	332.334	65.84	0.922747	74.8865	178.62	16.3847	43.3269	86.6887
MPI-ESM_GLAC1D	86.25	35.2556	-3.9831	1143.24	-6.27394	-3.26981	10.8699	-17.8938	259.329	49.2871	1.12198	68.7918	130.107	19.1904	66.0041	44.2493
MPI-ESM_GLAC1D	90	35.2556	-3.92304	1095.45	-5.60011	-3.13114	9.96235	-17.5019	282.12	51.5816	2.87276	66.4769	131.514	20.0956	87.6363	42.7651
MPI-ESM_GLAC1D	93.75	35.2556	-4.26582	1001.69	5.43232	-3.387	8.03591	-17.0976	430.174	77.6062	6.36117	73.7923	216	27.4361	187.04	46.9356
MPI-ESM_GLAC1D	97.5	35.2556	-3.46113	883.717	7.09451	-15.661	7.09451	-15.1406	784.689	158.755	9.51824	82.9575	424.406	29.7795	424.406	38.0861
MPI-ESM_GLAC1D	101.25	35.2556	-0.665556	842.398	9.22927	-11.983	9.22927	-11.983	1332.42	220.891	18.7811	65.1203	584.692	75.8073	584.692	75.8073
MPI-ESM_GLAC1D	105	35.2556	3.57077	834.153	13.5502	-7.56636	13.5502	-7.56636	1753.56	261.773	36.5301	53.5468	684.903	147.439	684.903	147.439
MPI-ESM_GLAC1D	108.75	35.2556	6.43064	916.651	17.4226	-5.98303	17.4226	-5.98303	1786.4	267.269	44.1311	51.8417	685.695	166.711	685.695	166.711
MPI-ESM_GLAC1D	112.5	35.2556	8.27943	973.625	19.9024	-5.06533	19.9024	-5.11779	1732.88	262.971	50.1241	48.674	678.73	167.35	678.73	192.784
MPI-ESM_GLAC1D	116.25	35.2556	10.4052	936.697	21.6225	-2.54125	21.6225	-2.52665	1456.94	221.308	45.9821	49.8104	599.2	158.704	599.2	181.734
MPI-ESM_GLAC1D	135	35.2556	14.4472	740.818	19.7832	5.65602	24.0081	4.82361	1219.72	225.523	30.6164	63.9982	561.485	108.187	459.83	116.287
MPI-ESM_GLAC1D	-120	35.2556	16.3924	789.606	7.17843	26.1902	26.4358	7.17843	202.292	44.5571	0.00181049	105.274	128.18	0.722952	4.26608	128.18
MPI-ESM_GLAC1D	-116.25	35.2556	14.4376	974.145	3.08663	26.7442	26.7442	3.08663	226.418	48.0758	0.00512972	97.5409	138.992	0.103198	0.103198	138.992
MPI-ESM_GLAC1D	-112.5	35.2556	11.9922	1102.77	-0.669226	26.2892	26.2892	-0.669226	291.711	56.8203	0.0234987	85.146	159.255	0.209338	0.209338	159.255
MPI-ESM_GLAC1D	-108.75	35.2556	11.0823	1165.05	-2.11584	26.4734	26.4734	-2.11584	306.054	54.159	0.206886	76.2722	144.715	1.65694	1.65694	144.715
MPI-ESM_GLAC1D	-105	35.2556	12.9798	1158.45	12.2282	24.6791	28.1824	-0.307898	286.587	47.3075	7.95119	49.5977	109.904	26.1337	28.1578	86.2917
MPI-ESM_GLAC1D	-101.25	35.2556	16.2716	1100.36	15.7256	30.2625	30.2625	3.22791	452.743	62.875	25.6358	24.0201	135.77	98.1955	98.1955	100.895
MPI-ESM_GLAC1D	-97.5	35.2556	18.0613	1027.56	22.9692	30.7325	30.7325	5.56645	679.156	95.9028	27.0307	33.7285	235.011	122.785	122.785	157.969
MPI-ESM_GLAC1D	-93.75	35.2556	17.1266	970.851	16.5835	28.9969	28.9969	5.30929	881.298	103.826	37.5623	28.9785	295.152	136.284	136.284	260.684
MPI-ESM_GLAC1D	-90	35.2556	14.5695	904.257	9.79456	14.9047	25.3972	3.44731	1212.85	132.435	62.7294	21.4355	370.56	212.235	312.532	343.814
MPI-ESM_GLAC1D	-86.25	35.2556	13.1933	872.761	21.6595	13.3975	23.4051	2.34249	1217.42	159.924	52.1577	32.2959	422.405	181.386	418.368	281.002
MPI-ESM_GLAC1D	-82.5	35.2556	13.8432	827.47	21.6068	3.93955	23.3556	3.45317	1095	149.508	42.7461	39.9313	419.908	172.229	410.53	225.037
MPI-ESM_GLAC1D	-78.75	35.2556	15.616	727.013	22.1361	7.29567	24.0868	6.51697	1079.92	139.928	40.7446	36.6853	397.458	162.189	312.185	218.644
MPI-ESM_GLAC1D	0	31.5445	18.5016	890.481	10.0144	28.6194	30.0886	7.79952	17.2514	3.27605	0.00626128	52.2549	8.87194	0.224086	0.24683	8.61307
MPI-ESM_GLAC1D	3.75	31.5445	18.2244	890.098	7.4727	28.0445	29.7143	7.4727	17.8988	3.14863	0.0238381	49.0645	8.74599	0.179503	0.324531	8.74599
MPI-ESM_GLAC1D	7.5	31.5445	17.6748	850.918	7.21359	28.5125	28.5125	7.21359	20.4457	4.35861	0.000754371	57.5527	10.5241	0.0976156	0.0976156	10.5241
MPI-ESM_GLAC1D	11.25	31.5445	17.7778	771.335	7.53688	27.4103	27.4103	8.04757	29.4981	6.84502	0.00158418	66.5974	18.9785	0.393669	0.393669	15.6135
MPI-ESM_GLAC1D	15	31.5445	18.4432	692.925	9.51958	26.9506	26.9506	9.51958	17.978	3.61638	4.63078e-12	54.947	9.3066	0.0187461	0.0187461	9.3066
MPI-ESM_GLAC1D	18.75	31.5445	19.2088	639.69	10.9395	27.1446	27.1446	10.9395	10.3432	2.23456	0.000150874	43.3459	5.89639	0.00814721	0.00814721	5.89639
MPI-ESM_GLAC1D	22.5	31.5445	19.3587	593.774	11.7566	26.8556	26.8556	11.7566	5.85879	1.19206	0.00132015	31.0137	3.19288	0.0089393	0.0089393	3.19288
MPI-ESM_GLAC1D	33.75	31.5445	19.1028	688.521	9.96294	27.0465	27.4806	9.96294	72.79	22.0437	0.000377186	117.559	55.9646	0.0231969	0.0299108	55.9646
MPI-ESM_GLAC1D	37.5	31.5445	18.7801	909.939	6.82882	29.066	29.9995	6.82882	38.1337	11.8038	4.3583e-12	104.105	30.462	0.00241399	0.00607269	30.462
MPI-ESM_GLAC1D	41.25	31.5445	18.6225	1082.08	4.43494	31.9643	31.9643	4.43494	16.3765	4.67597	4.63078e-12	70.5821	12.2729	0.000150874	0.000150874	12.2729
MPI-ESM_GLAC1D	45	31.5445	19.3309	1122.12	4.54627	33.1043	33.1043	4.54627	15.3638	2.85447	4.63078e-12	57.021	8.54507	0.0242908	0.0242908	8.54507
MPI-ESM_GLAC1D	48.75	31.5445	18.8299	1078.04	7.54432	31.9903	31.9903	4.49744	27.5354	5.10128	0.000150874	65.963	14.2236	0.177315	0.177315	13.1715
MPI-ESM_GLAC1D	52.5	31.5445	16.3027	1045.19	10.1852	28.8634	28.8634	2.22986	70.0648	15.77	3.77186e-05	83.2984	37.4218	0.29941	0.29941	30.2227
MPI-ESM_GLAC1D	56.25	31.5445	14.6707	1060.69	3.50786	27.0899	27.0899	0.240279	64.9305	14.9118	7.54371e-05	84.8117	34.8317	0.0308161	0.0308161	30.0475
MPI-ESM_GLAC1D	60	31.5445	15.2975	1095.75	4.02609	27.8777	27.8777	0.321008	45.1855	9.40015	4.63078e-12	81.1442	23.8197	0.00143331	0.00143331	22.4202
MPI-ESM_GLAC1D	63.75	31.5445	15.977	1097.7	0.927779	28.6297	28.6297	0.927779	44.4969	9.81354	4.3583e-12	82.1248	23.7627	0.000188593	0.000188593	23.7627
MPI-ESM_GLAC1D	67.5	31.5445	15.379	1066.9	0.791711	27.8204	27.8204	0.791711	64.1959	12.8315	4.3583e-12	85.8479	34.9493	0.0196137	0.0196137	34.9493
MPI-ESM_GLAC1D	71.25	31.5445	13.7606	1032.03	-0.183549	24.6155	25.8797	-0.183549	147.671	31.3225	0.0254977	93.4917	82.7296	0.410755	0.464693	82.7296
MPI-ESM_GLAC1D	75	31.5445	10.3916	1010.04	-3.10282	22.3959	22.3959	-3.10282	297.981	63.7372	0.861153	93.646	180.287	5.1737	5.1737	180.287
MPI-ESM_GLAC1D	78.75	31.5445	4.04017	1054.66	-7.69722	14.5957	16.8146	-9.71805	409.761	75.4364	3.56794	79.8899	212.231	23.8638	26.6643	225.019
MPI-ESM_GLAC1D	82.5	31.5445	-2.33092	1063.63	-13.8737	-0.895463	10.8862	-15.6901	473.536	78.6136	11.2881	52.5691	167.165	68.2835	138.035	151.176
MPI-ESM_GLAC1D	86.25	31.5445	-4.84817	1013.77	7.30284	-3.62203	7.30284	-17.9121	613.228	192.694	16.1728	111.579	372.449	53.4371	372.449	77.6662
MPI-ESM_GLAC1D	90	31.5445	-4.03291	925.285	6.36274	-14.5084	6.36274	-16.401	660.031	234.057	8.33728	141.962	506.957	35.3319	506.957	42.5109
MPI-ESM_GLAC1D	93.75	31.5445	-2.46227	811.209	6.10362	-12.1757	6.10362	-13.763	737.8	221.959	6.83033	123.832	542.857	27.3442	542.857	34.002
MPI-ESM_GLAC1D	97.5	31.5445	-0.664743	681.836	6.4643	-10.2428	6.4643	-10.2428	928.115	202.486	7.84184	101.901	583.96	25.0224	583.96	25.0224
MPI-ESM_GLAC1D	101.25	31.5445	2.38555	619.03	8.33401	-6.01493	9.20714	-6.01493	1623.15	274.482	24.8804	67.7951	739.61	86.8862	710.105	86.8862
MPI-ESM_GLAC1D	105	31.5445	6.43405	657.144	10.3384	-2.66039	14.1961	-2.38993	2311.93	328.669	75.5094	42.6147	880.97	238.097	777.466	282.467
MPI-ESM_GLAC1D	108.75	31.5445	9.1445	825.263	14.1105	-1.86546	18.9246	-2.13407	2249.87	336.341	82.7753	43.2759	900.478	276.709	727.308	323.808
MPI-ESM_GLAC1D	112.5	31.5445	10.2902	959.639	16.1502	-0.0344096	21.5906	-3.00581	2146.92	303.959	81.2884	43.9429	861.037	279.42	685.183	373.738
MPI-ESM_GLAC1D	116.25	31.5445	11.8123	924.566	17.0806	1.79111	22.7599	-0.998002	1961.59	271.679	68.0773	45.5889	767.022	256.919	646.516	381.926
MPI-ESM_GLAC1D	120	31.5445	14.055	812.135	17.6704	5.68239	23.7364	3.00525	1640.97	236.884	46.902	47.9945	644.039	204.037	567.785	322.818
MPI-ESM_GLAC1D	-116.25	31.5445	21.1067	726.596	12.2442	26.9616	30.1734	12.2442	133.326	29.888	0.0165962	87.7871	84.412	0.276774	19.1965	84.412
MPI-ESM_GLAC1D	-112.5	31.5445	19.6632	885.404	9.19601	27.571	30.6707	9.19601	192.14	38.5397	0.0294205	85.4692	109.327	0.304044	0.632427	109.327
MPI-ESM_GLAC1D	-108.75	31.5445	16.8349	992.514	5.34184	26.8555	29.8386	5.34184	310.186	54.6504	0.138239	83.3059	153.284	1.96649	5.04942	153.284
MPI-ESM_GLAC1D	-105	31.5445	15.6193	1002.8	14.5655	26.5345	28.6544	3.81124	386.35	73.9109	2.72727	69.8011	154.911	13.7371	31.9029	147.283
MPI-ESM_GLAC1D	-101.25	31.5445	18.0989	927.296	17.4073	29.5255	29.5255	6.66541	417.812	52.9519	15.6839	31.2581	133.706	61.1093	61.1093	122.285
MPI-ESM_GLAC1D	-97.5	31.5445	20.8812	812.377	21.1968	30.0907	30.4357	10.558	560.806	89.9089	7.02289	47.3834	214.491	57.1764	60.8353	166.052
MPI-ESM_GLAC1D	-93.75	31.5445	20.483	729.719	13.2403	29.0463	29.0463	11.3034	776.06	94.3338	40.8395	27.6521	268.488	134.536	134.536	260.373
MPI-ESM_GLAC1D	-90	31.5445	17.5927	649.597	25.0873	10.0307	25.0873	9.41476	1220.59	162.682	50.3983	30.8539	409.341	240.013	409.341	326.99
MPI-ESM_GLAC1D	-86.25	31.5445	16.6406	625.607	23.6987	9.1622	23.6987	8.77088	1320.93	188.617	43.6637	42.2246	519.07	185.95	519.07	255.901
MPI-ESM_GLAC1D	-82.5	31.5445	18.3188	606.578	23.7884	11.172	25.1038	10.5606	1127.64	184.396	32.3185	50.0146	473.553	131.522	385.344	182.248
MPI-ESM_GLAC1D	-7.5	31.5445	20.6963	677.616	13.9232	29.2566	29.3316	12.5215	60.7843	10.5689	0.895703	61.5971	30.0616	4.94656	4.99941	30.6704
MPI-ESM_GLAC1D	-3.75	31.5445	19.4658	833.903	11.3204	29.4631	30.336	9.47205	38.7838	7.78553	0.279155	67.5182	21.2477	1.36405	1.38156	22.1086
MPI-ESM_GLAC1D	0	27.8334	21.7506	911.338	9.19378	30.9332	32.9077	10.183	2.27538	0.54416	7.54371e-05	16.8586	1.03394	0.000565778	0.00562007	1.05363
MPI-ESM_GLAC1D	3.75	27.8334	20.8707	912.47	9.25395	29.7288	31.7748	9.25395	2.10289	0.447229	4.3583e-12	13.6149	1.11813	0.0237627	0.0987472	1.11813
MPI-ESM_GLAC1D	7.5	27.8334	19.8512	887.618	8.4408	30.2429	30.2429	8.4408	2.78839	0.818419	4.63078e-12	22.3596	1.66724	0.00660075	0.00660075	1.66724
MPI-ESM_GLAC1D	11.25	27.8334	19.5748	851.365	8.49028	27.4319	29.3504	8.49028	3.53646	0.924859	4.3583e-12	26.288	2.14883	0.0311555	0.0327397	2.14883
MPI-ESM_GLAC1D	15	27.8334	19.6958	828.775	8.10524	27.3173	29.1245	8.85291	3.87762	0.998229	4.63078e-12	28.8438	2.69024	0.00286661	0.0205566	2.10157
MPI-ESM_GLAC1D	18.75	27.8334	19.5993	794.829	8.47047	28.6941	28.6941	9.15109	3.47675	1.03858	4.3583e-12	28.5182	2.98825	0.00331923	0.00331923	2.21838
MPI-ESM_GLAC1D	22.5	27.8334	18.9603	718.71	8.81032	27.1733	27.1733	9.29627	2.59489	0.832676	4.3583e-12	24.5853	2.3722	1.38758e-11	1.38758e-11	1.74388
MPI-ESM_GLAC1D	26.25	27.8334	18.6375	640.926	9.41318	25.7866	25.7866	9.7546	6.40073	1.88167	4.63078e-12	43.5006	5.2135	0.00595953	0.00595953	3.98433
MPI-ESM_GLAC1D	30	27.8334	19.4401	638.637	10.5769	26.0302	26.5548	10.5769	7.85316	2.22064	3.77186e-05	48.8143	5.51615	0.0160304	0.0268556	5.51615
MPI-ESM_GLAC1D	33.75	27.8334	20.7182	735.832	10.7898	28.5439	29.3002	10.7898	4.03766	1.12722	4.3583e-12	31.6319	2.91632	0.000188593	0.00177277	2.91632
MPI-ESM_GLAC1D	37.5	27.8334	21.2711	872.816	16.6448	30.8056	31.7553	9.67973	3.03371	0.751052	4.63078e-12	21.8425	1.89903	0.0172374	0.0183689	1.50731
MPI-ESM_GLAC1D	41.25	27.8334	21.5148	978.637	16.5556	31.1914	33.2169	8.39718	4.24862	1.05299	4.63078e-12	25.3336	2.24668	0.0139883	0.165622	1.95627
MPI-ESM_GLAC1D	45	27.8334	22.4085	1002.74	11.9082	32.4362	34.3413	8.78715	6.19773	1.68768	4.88674e-12	33.5559	3.18391	0.0596278	0.264897	3.45291
MPI-ESM_GLAC1D	48.75	27.8334	22.3011	962.582	16.6025	33.9051	33.9051	9.1921	10.7395	1.89816	0.0020368	38.7832	5.45857	0.195873	0.195873	4.01914
MPI-ESM_GLAC1D	56.25	27.8334	20.5724	910.97	15.1279	29.8353	31.1707	7.99353	53.3815	9.10086	0.366549	49.7516	20.3889	5.15212	6.26536	9.97007
MPI-ESM_GLAC1D	60	27.8334	21.4813	911.91	16.9026	31.7482	31.7482	8.72986	37.5071	5.30489	0.773759	38.4535	12.0277	3.66711	3.66711	10.0981
MPI-ESM_GLAC1D	63.75	27.8334	22.3948	878.137	23.6225	23.0349	32.226	10.0144	37.0078	5.54173	1.29993	32.1925	13.1529	6.19912	6.84826	10.2077
MPI-ESM_GLAC1D	67.5	27.8334	23.0234	800.812	30.8844	13.6414	31.81	11.5359	72.9766	13.5434	2.88467	50.5858	34.8584	12.4871	27.3154	12.8549
MPI-ESM_GLAC1D	71.25	27.8334	23.6691	749.869	23.7614	26.0776	31.5521	12.9161	150.096	30.9635	1.9577	64.2825	70.2267	9.15728	25.1531	27.089
MPI-ESM_GLAC1D	75	27.8334	22.2247	746.713	21.8168	29.4972	30.4772	11.7728	231.357	37.9183	0.684813	58.7802	88.6022	11.7831	35.5229	73.8226
MPI-ESM_GLAC1D	78.75	27.8334	16.0744	726.948	20.9762	18.8504	24.3705	6.04627	585.252	210.922	0.933982	127.222	405.229	18.7625	237.79	103.349
MPI-ESM_GLAC1D	82.5	27.8334	8.31866	682.171	13.3101	10.284	16.2585	-0.866492	1101.89	402.026	2.63837	145.265	867.914	28.2451	461.085	104.935
MPI-ESM_GLAC1D	86.25	27.8334	4.70489	614.32	9.42928	6.48387	11.6244	-3.59631	1280.44	383.007	11.4937	120.764	918.297	51.7249	516.485	105.555
MPI-ESM_GLAC1D	90	27.8334	4.66761	545.188	9.88031	2.80563	10.4616	-2.9368	1455.33	355.213	25.7705	96.1721	879.334	89.2855	662.713	124.538
MPI-ESM_GLAC1D	93.75	27.8334	5.14467	499.932	9.88031	0.141321	10.1406	-2.00907	1449.6	293.463	33.7487	81.4514	794.347	113.168	682.306	120.663
MPI-ESM_GLAC1D	97.5	27.8334	5.61195	457.785	10.2195	-0.727169	10.2195	-0.727169	1632.14	301.172	24.0604	80.3738	864.688	78.3669	864.688	78.3669
MPI-ESM_GLAC1D	101.25	27.8334	7.56312	434.213	12.3308	1.88221	12.3308	1.88221	1875.96	290.806	43.1952	59.1921	819.573	146.715	819.573	146.715
MPI-ESM_GLAC1D	105	27.8334	10.5265	508.436	14.0994	3.39105	16.392	3.77609	2012.91	285.51	82.7625	39.9011	776.963	281.669	647.596	337.607
MPI-ESM_GLAC1D	108.75	27.8334	12.5504	683.87	17.2225	4.85947	20.2996	2.97726	1945.07	308.055	65.4829	50.9146	837.598	238.677	557.617	353.548
MPI-ESM_GLAC1D	112.5	27.8334	13.2244	806.111	14.5457	4.13421	22.2657	1.76827	1953.86	293.783	51.8559	54.2456	832.252	230.596	570.707	393.905
MPI-ESM_GLAC1D	116.25	27.8334	14.2962	766.021	15.228	5.59515	23.0431	3.52023	1956.47	268.976	47.2389	50.2822	777.777	237.037	602.31	426.152
MPI-ESM_GLAC1D	120	27.8334	16.6847	652.013	20.145	9.70973	24.2677	7.61267	1917	274.759	41.5944	49.2195	759.217	223.274	669.509	396.46
MPI-ESM_GLAC1D	-112.5	27.8334	24.0167	560.966	16.7963	28.1048	30.7932	16.7963	202.181	47.7456	0.0419808	95.2095	112.574	0.600097	52.0946	112.574
MPI-ESM_GLAC1D	-108.75	27.8334	20.5674	661.675	25.0086	24.4158	28.8738	12.2572	400.452	119.536	0.38148	95.7149	200.322	8.17693	53.8914	144.775
MPI-ESM_GLAC1D	-105	27.8334	16.5545	710.639	19.7592	22.2212	25.284	7.78781	731.329	138.364	3.70185	64.3654	310.079	33.0154	183.684	230.849
MPI-ESM_GLAC1D	-101.25	27.8334	17.9163	681.875	9.22531	25.9285	25.9285	9.22531	587.023	62.2451	32.628	18.4458	180.032	122.5	122.5	180.032
MPI-ESM_GLAC1D	-97.5	27.8334	22.2308	578.867	22.2996	28.8909	28.95	14.722	651.564	113.074	6.42287	56.1274	280.787	50.6164	69.1236	193.562
MPI-ESM_GLAC1D	-11.25	27.8334	23.8694	641.666	15.8464	29.1849	31.926	15.8464	13.8714	2.79155	0.205378	37.4435	7.90826	1.76421	2.11669	7.90826
MPI-ESM_GLAC1D	-7.5	27.8334	23.3108	822.825	13.0111	33.8204	33.8204	13.0111	6.62025	2.16542	0.000301749	44.3901	5.43057	0.0328152	0.0328152	5.43057
MPI-ESM_GLAC1D	-3.75	27.8334	22.4865	892.594	14.0176	31.9592	33.7143	11.2312	2.70325	0.924067	0.000113156	21.5398	1.69361	0.00158418	0.00580866	2.24414
MPI-ESM_GLAC1D	0	24.1223	25.5123	803.498	27.3068	33.0256	34.8484	14.9974	0.767161	0.538918	4.3583e-12	14.4446	0.649069	7.54371e-05	0.000113156	0.0290433
MPI-ESM_GLAC1D	3.75	24.1223	23.7474	785.865	26.1792	32.532	32.532	13.2748	0.469335	0.263157	4.63078e-12	7.14727	0.37659	7.54371e-05	7.54371e-05	0.030288
MPI-ESM_GLAC1D	7.5	24.1223	21.8468	760.58	24.659	30.1271	30.1823	11.6348	0.566423	0.292024	4.3583e-12	8.16939	0.493819	0.000414904	0.109643	0.0528437
MPI-ESM_GLAC1D	11.25	24.1223	20.7949	754.549	18.6227	27.0035	29.0768	10.6374	0.686104	0.495441	4.3583e-12	13.1807	0.522415	1.38104e-11	0.00900946	0.125226
MPI-ESM_GLAC1D	15	24.1223	20.0377	770.323	23.4259	26.3557	28.416	9.69015	0.844333	0.334081	4.3583e-12	9.25698	0.40469	1.38104e-11	0.0684916	0.35844
MPI-ESM_GLAC1D	18.75	24.1223	19.1056	765.388	7.90081	25.4111	27.3255	8.77218	1.38695	0.47499	4.3583e-12	15.8706	1.42271	0.000150874	0.0116875	1.00995
MPI-ESM_GLAC1D	22.5	24.1223	18.3965	722.267	7.66058	25.7748	25.9929	8.4408	2.19598	0.759992	4.3583e-12	22.3607	1.9347	7.54371e-05	0.000673654	1.3475
MPI-ESM_GLAC1D	26.25	24.1223	18.8693	692.22	8.44899	25.9181	25.972	9.14848	2.12265	0.676559	4.3583e-12	21.8195	1.89728	1.38758e-11	0.00146574	1.38156
MPI-ESM_GLAC1D	30	24.1223	20.9334	703.424	18.2933	27.413	28.5528	11.0599	0.993435	0.361313	4.3583e-12	11.9108	0.521623	3.77186e-05	3.77186e-05	0.627524
MPI-ESM_GLAC1D	33.75	24.1223	24.0734	733.7	16.1641	31.2774	32.685	14.0183	0.593165	0.265884	4.63078e-12	7.21354	0.33638	0.000221031	0.0939947	0.105612
MPI-ESM_GLAC1D	41.25	24.1223	24.6198	869.226	30.8126	29.5662	34.7859	12.7168	5.0882	1.18538	0.000296468	29.8062	3.06328	0.193875	1.64313	0.696775
MPI-ESM_GLAC1D	45	24.1223	23.7156	956.284	33.8199	29.5773	34.6804	10.39	10.006	4.24228	0.00323852	63.1687	6.75023	0.390464	2.59507	1.30917
MPI-ESM_GLAC1D	48.75	24.1223	23.9985	931.431	33.9469	10.9415	34.7755	10.9415	15.8955	4.32602	0.176711	64.3915	10.8601	0.970914	6.71081	0.970914
MPI-ESM_GLAC1D	71.25	24.1223	25.4362	394.659	26.1206	25.443	30.2166	19.7155	552.494	208.544	0.341428	138.807	406.534	2.65129	36.5135	5.46836
MPI-ESM_GLAC1D	75	24.1223	25.7446	508.472	26.206	30.4181	32.7772	19.3991	550.708	184.663	0.12605	134.711	422.757	0.786591	25.7839	14.4954
MPI-ESM_GLAC1D	78.75	24.1223	22.7952	591.025	23.5803	27.8589	30.977	15.7136	876.159	286.162	0.324752	141.91	715.6	5.86487	54.0849	39.2951
MPI-ESM_GLAC1D	82.5	24.1223	19.1098	525.162	20.6337	23.0451	25.9256	12.4786	1117.51	377.599	4.63969	140.599	873.122	21.9625	122.442	53.8777
MPI-ESM_GLAC1D	86.25	24.1223	17.5016	396.043	20.267	17.4502	22.3006	12.2689	1311.45	398.779	13.9753	123.404	934.624	48.785	248.991	56.6498
MPI-ESM_GLAC1D	90	24.1223	16.8283	282.126	18.8334	14.351	19.6723	12.7911	1271.99	279.693	24.573	87.9454	750.524	83.7872	349.187	87.447
MPI-ESM_GLAC1D	93.75	24.1223	14.8668	305.926	17.6179	11.879	17.6179	10.446	1088.17	229.357	28.5775	80.845	605.394	92.6688	605.394	99.5456
MPI-ESM_GLAC1D	97.5	24.1223	12.9236	345.443	16.2729	9.72921	16.2729	8.20903	1308.59	267.706	34.335	77.0894	692.821	119.581	692.821	129.102
MPI-ESM_GLAC1D	101.25	24.1223	13.0252	385.716	16.8159	7.24261	16.8731	7.24261	1377.34	267.224	33.9938	76.4288	730.268	122.198	624.621	122.198
MPI-ESM_GLAC1D	105	24.1223	14.7975	448.161	19.4988	9.01312	19.4988	8.91346	1490.25	234.353	38.1201	56.5978	634.071	146.386	634.071	220.127
MPI-ESM_GLAC1D	108.75	24.1223	16.6522	540.064	20.7576	10.1082	22.4357	9.06385	1676.74	251.589	26.7407	59.3438	663.219	127.856	652.939	236.742
MPI-ESM_GLAC1D	112.5	24.1223	17.812	571.785	21.7759	11.1056	23.9526	9.55213	1490.19	234.128	19.6962	60.6185	595.206	113.976	558.242	219.967
MPI-ESM_GLAC1D	116.25	24.1223	18.9767	501.418	24.4799	13.3152	24.4799	11.7631	1575.12	229.612	32.0959	52.5252	587.353	154.847	587.353	266.061
MPI-ESM_GLAC1D	-105	24.1223	17.296	406.321	19.7678	18.7488	22.3334	11.9909	1247.93	231.126	29.515	64.9624	624.272	117.813	357.232	276.915
MPI-ESM_GLAC1D	-101.25	24.1223	16.8523	428.425	20.9884	18.6981	21.5938	11.1159	1027.26	166.054	49.6402	41.2782	414.138	178.116	366.911	256.807
MPI-ESM_GLAC1D	-15	24.1223	25.7902	589.802	33.3336	24.4416	33.3336	18.4564	6.19358	1.93474	0.0148306	39.3005	3.80199	0.0752942	3.80199	1.26931
MPI-ESM_GLAC1D	-11.25	24.1223	26.8081	834.242	19.2409	17.0177	37.4304	16.5951	2.47615	0.805027	0.00053334	19.4084	1.31484	0.908932	0.747054	1.70088
MPI-ESM_GLAC1D	-7.5	24.1223	26.3118	895.335	18.2572	15.5932	37.6264	15.2637	1.48412	0.304087	0.00143859	9.48681	0.655555	0.399769	0.402495	0.666072
MPI-ESM_GLAC1D	-3.75	24.1223	26.1758	842.851	32.0226	34.4312	36.4396	15.4707	1.22152	0.416596	4.3583e-12	14.2355	0.909661	0.000188593	0.396686	0.103877
MPI-ESM_GLAC1D	0	20.4112	28.4088	712.79	36.2032	18.9603	36.2032	18.9603	1.65638	0.664865	4.29991e-05	20.4035	0.829544	0.00143331	0.829544	0.00143331
MPI-ESM_GLAC1D	3.75	20.4112	25.5538	726.761	31.7095	15.905	33.3276	15.905	0.940515	0.567219	4.29991e-05	15.0832	0.779645	0.000867527	0.172789	0.000867527
MPI-ESM_GLAC1D	7.5	20.4112	22.8934	726.285	25.9077	13.3093	30.601	13.3093	0.67807	0.612104	4.63078e-12	16.6284	0.674906	0.000980683	0.00135787	0.000980683
MPI-ESM_GLAC1D	11.25	20.4112	21.8882	724.478	28.1678	12.3757	29.6075	12.3757	1.37122	0.765455	3.88502e-05	23.5817	1.33992	0.00196137	0.0244039	0.00196137
MPI-ESM_GLAC1D	15	20.4112	21.4765	713.795	24.7222	10.8963	28.9838	12.0352	0.992982	0.530091	7.54371e-05	17.7088	0.984161	0.00132128	0.00267802	0.00132015
MPI-ESM_GLAC1D	18.75	20.4112	20.7479	681.083	24.1401	19.4151	27.6974	11.6205	0.0817391	0.0347837	4.88674e-12	1.20237	0.0648084	0.00203077	0.00482798	0.00991998
MPI-ESM_GLAC1D	22.5	20.4112	20.0836	656.196	10.1619	26.713	26.713	11.2045	0.116553	0.0390082	3.77186e-05	1.40942	0.0551834	0.000565778	0.000565778	0.0258749
MPI-ESM_GLAC1D	26.25	20.4112	20.6854	672.676	23.3595	19.9385	27.7547	11.4981	0.20621	0.133418	4.88674e-12	3.71924	0.164348	0.00161586	0.0241022	0.0144085
MPI-ESM_GLAC1D	30	20.4112	23.1668	689.085	30.8946	13.5997	30.8946	13.5997	0.470089	0.24336	4.82128e-12	7.89908	0.245397	0.000716653	0.245397	0.000716653
MPI-ESM_GLAC1D	33.75	20.4112	27.1489	649.376	32.1434	17.9718	34.7547	18.0651	1.36213	0.835994	4.88674e-12	21.7624	1.09173	0.000453755	0.85342	0.00237627
MPI-ESM_GLAC1D	41.25	20.4112	27.1063	689.368	34.6396	17.2823	35.0138	17.4089	17.491	11.8715	3.77186e-05	136.502	15.4011	0.0505063	14.3212	0.175391
MPI-ESM_GLAC1D	45	20.4112	24.0314	827.909	29.6466	12.2976	33.3771	12.2976	18.5816	6.83698	0.0291135	85.1505	14.5407	0.198664	5.86003	0.198664
MPI-ESM_GLAC1D	48.75	20.4112	23.6709	844.341	32.3648	11.6192	33.2026	11.6192	44.0351	18.1385	0.0405475	121.556	36.7582	0.14763	19.2339	0.14763
MPI-ESM_GLAC1D	52.5	20.4112	25.1969	679.949	31.9182	15.3314	32.728	15.3314	30.2742	12.383	0.0696662	105.18	23.4392	0.322079	11.4588	0.322079
MPI-ESM_GLAC1D	56.25	20.4112	25.7674	477.347	29.9846	18.7865	30.7469	18.7865	21.0684	9.07365	0.0241033	94.3308	15.7851	0.172676	7.6551	0.172676
MPI-ESM_GLAC1D	71.25	20.4112	23.93	233.664	23.3069	24.7073	27.2309	20.8698	808.979	238.651	0.0826863	130.735	603.966	0.366939	57.9504	1.9562
MPI-ESM_GLAC1D	75	20.4112	23.4526	386.445	22.8811	27.6128	29.1776	19.226	1148.71	309.994	0.255576	129.69	869.285	2.15015	109.584	7.7205
MPI-ESM_GLAC1D	78.75	20.4112	23.4352	481.609	23.4169	24.0315	30.3761	17.4145	1588.93	443.604	3.79314	131.252	1207.72	11.9109	198.042	19.5661
MPI-ESM_GLAC1D	82.5	20.4112	24.3761	423.208	25.1585	19.1622	30.102	19.1622	1325.29	392.763	5.78595	125.824	938.624	23.936	246.4	23.936
MPI-ESM_GLAC1D	97.5	20.4112	19.4375	320.381	21.2034	19.6045	22.8846	14.4594	1101.47	256.85	12.0349	104.589	692.421	44.8856	278.064	56.227
MPI-ESM_GLAC1D	101.25	20.4112	18.208	392.357	20.2405	12.27	22.5109	12.27	1025.46	241.118	12.9988	99.2644	618.049	55.8951	284.81	55.8951
MPI-ESM_GLAC1D	105	20.4112	18.8654	411.626	21.8121	12.6443	22.905	12.6443	1398.72	292.774	20.7146	83.1749	749.113	79.6915	605.224	79.6915
MPI-ESM_GLAC1D	108.75	20.4112	21.1515	403.766	25.3393	15.0727	25.3393	15.392	1425.93	272.898	22.5564	73.6433	693.033	96.9516	693.033	122.01
MPI-ESM_GLAC1D	-101.25	20.4112	18.3608	263.212	20.1407	14.5929	21.4341	14.8008	1106.03	197.051	33.6415	63.7581	538.85	147.788	331.205	166.408
MPI-ESM_GLAC1D	-97.5	20.4112	19.6548	276.417	21.989	16.0496	22.2036	15.8327	1017.19	158.243	34.7272	51.4467	447.976	130.959	383.813	168.358
MPI-ESM_GLAC1D	-90	20.4112	25.0875	193.093	26.8601	22.2872	26.8601	22.2872	1125.79	224.102	28.3546	62.2121	497.16	103.346	497.16	103.346
MPI-ESM_GLAC1D	-15	20.4112	28.6027	570.699	34.8941	21.6583	34.9565	21.0365	7.39827	3.27608	0.000571059	61.29	6.05036	0.37544	5.49929	0.741849
MPI-ESM_GLAC1D	-11.25	20.4112	29.4713	767.945	37.1226	19.95	38.4428	19.67	6.7534	2.76794	0.000457903	57.8026	5.87033	0.258098	4.51838	0.431123
MPI-ESM_GLAC1D	-7.5	20.4112	28.7215	770.841	37.6668	19.2397	37.6668	18.8835	3.77163	1.43146	0.000307029	34.2675	2.40328	0.0230736	2.40328	0.0356063
MPI-ESM_GLAC1D	-3.75	20.4112	28.8771	715.767	36.6263	19.53	36.9526	19.53	2.90924	1.02187	0.000226311	30.1725	1.69759	0.00128243	1.62933	0.00128243
[truncated: 7,394 more rows]

## Sheet: README
Bioclimatic variable (code)	Bioclimatic variable (full name)
[truncated: 14 more rows]
