# Supplementary material for: Global biome changes over the last 21 000 years inferred from model–data comparisons
Source: Copernicus journal article supplement (doi:10.5194/cp-21-1001-2025), 2025-06-11
Supplement: Supplementary file 1 [file cp-21-1001-2025-supplement.zip]

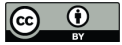

## *Supplement of*

# **Global biome changes over the last 21 000 years inferred from model–data comparisons**

**Chenzhi Li et al.**

*Correspondence to:* Ulrike Herzschuh ([ulrike.herzschuh@awi.de](mailto:ulrike.herzschuh@awi.de))

- [cp-21-1001-2025-supplement-title-page.pdf](#)
- [Supplementary DataS1-Overview of LegacyPollen2.0 dataset.xlsx](#)
- [Supplementary DataS2-Taxa-PFTs.xlsx](#)
- [Supplementary DataS3-PFTs-Megabiome.xlsx](#)
- [Supplementary DataS4-Reconstructed and simulated megabiome for record.xlsx](#)
- [Supplementary DataS5-Reconstructed and simulated megabiome for grid cell.xlsx](#)
- [Supplementary DataS6-Reconstructed and simulated megabiome for grid cell.nc](#)
- [Supplementary DataS7-Observed and simulated bioclimatic variables at 0ka for grid cell.xlsx](#)

The copyright of individual parts of the supplement might differ from the article licence.
