# Supplementary material for: Global biome changes over the last 21 000 years inferred from model–data comparisons
Source: Copernicus journal article supplement (doi:10.5194/cp-21-1001-2025), 2025-06-11
Supplement: Supplementary file 2 [file Supplementary DataS1-Overview of LegacyPollen2.0 dataset.xlsx]

## Sheet: overview
Event_LegacyPollen	Event_PANGAEA	Event_Neotoma	Neotoma_DOI	Data_Source	Site_ID	Dataset_ID	Site_Name	Latitude	Longitude	Elevation	Continent	Archive_Type	Data_Type	Number_Pollen_Samples	AgeModel_Source	Number_Datings	minimum_meanAge	maximum_meanAge	mean_resolution_meanAge	range_meanAge	Site_Description	Submission_Pollendata	Publication_1	Publication_DOI_1	Publication_2	Publication_DOI_2	Publication_3	Publication_DOI_3	Publication_4	Publication_DOI_4	Publication_5	Publication_DOI_5	Publication_6	Publication_DOI_6	Publication_7	Publication_DOI_7	Publication_8	Publication_DOI_8
3PINES	3PINES	3PINES	10.21233/n3bc7k	Neotoma (last access: 1 April 2021)	7	7	Three Pines Bog	47	-80.1167	294	North America	Peat	Raw	41	AWI	2	207	7394	179.7	7187	Bog.		Gordon, D.L., 1990. Prehistoric occupations at Lake Temagami. In: Temagami: a debate on wilderness, ed. by Bray, M. and Thomson, A. (pp.152-183). Dunburn Press, Toronto, Ontario, Canada.
ABALONE	ABALONE	ABALONE	10.21233/n36p49	Neotoma (last access: 1 April 2021)	8	8	Abalone Rocks Marsh	33.9564	-119.977	0	North America	Peat	Raw	32	AWI	8	-49	5845	190.1	5894	Small estuarine marsh. Physiography: Santa Rosa Island. Surrounding vegetation: coastal marsh and grassland.		Cole, K.L. and Liu, G.W., 1994. Holocene paleoecology of an estuary on Santa Rosa Island, California. Quaternary Research, 41(3), pp.326-335.	https://doi.org/10.1006/qres.1994.1037
ADANGE	ADANGE	ADANGE	10.21233/n3301b	Neotoma (last access: 1 April 2021)	9	9	Adange	43.3056	41.3333	1750	Europe	Alluvial/Fluvial	Raw	40	AWI	4	-61	4653	120.9	4714	Meander of Adange river. Physiography: Fluvial terrace above flood-plain. Surrounding vegetation: Subalpine tall herbaceous vegetation.	1984-08-01 00:00:00	Kvavadze, E.V. and Rukhadze, L.P., 1989. Vegetation and climate of the Holocene of Abkhazia. Metsniereba, Tbilisi, Georgia. Scientific and Publishing Council of the Georgian SSR Academy of Sciences, p.136 (in Russian).
Adycha_River	Adycha_River	ADYCHA	10.21233/n3097s	Neotoma (last access: 1 April 2021)	11	11	Konus Exposure, Adycha River	67.75	135.583	130	Asia	Alluvial/Fluvial	Raw	13	AWI	5	1007	9817	734.2	8810	Exposure on slope. Surrounding vegetation: open Larix dahurica forest.		Anderson, P.M. and Lozhkin, A.V., 2002. Late Quaternary Vegetation and Climate of Siberia and the Russian Far East (Palynological and Radiocarbon Database). North East Science Center, Far East Branch, Russian Academy of Sciences, Magadan, Russia.
AGE_neotoma	AGE	AGE	10.21233/znex-sp94	Neotoma (last access: 1 April 2021)	12	12	Ageröds Mosse	55.9345	13.4277	58	Europe	Peat	Raw	135	AWI	33	-29	12403	92.8	12432	Forested Sphagnum bog. Physiography: till. Surrounding vegetation: pasture and arable land.	1960-01-01 00:00:00	Nilsson, T., 1964. Standard pollen diagramme und C14 datiengen aus dem Agerods mosse in mittleren schonen. Lunds Universitets Arsskrift N. F., 59(7), pp.1-52 (in German).
AGUILAR	AGUILAR	AGUILAR	10.21233/n3g974	Neotoma (last access: 1 April 2021)	15	15	Aguilar	-23.8333	-65.75	4000	South America	Peat	Raw	24	AWI	3	-56	11192	489	11248	Fen along creek above Mina Aguilar. Physiography: bog cut by creek draining endmoraines. Surrounding vegetation: Altiplano paramo grassland.	1981-02-01 00:00:00	Markgraf, V., 1985. Paleoenvironmental history of the last 10,000 years in northwestern Argentina. Zentralblatt fur Geologie und Palaontologie. Teil 1, Allgemeine, Angewandte, Regionale und Historische Geologie, 1984(11-12), pp.1739-1749.
AHL5	AHL5	AHL5	10.21233/n3bh6k	Neotoma (last access: 1 April 2021)	16	16	Ahlenmoor	53.694	8.72907	2	Europe	Peat	Raw	50	AWI	5	136	4537	89.8	4401	Excavated bog. Physiography: Raised bog. Surrounding vegetation: Sphagnetum.	1973-06-26 00:00:00	Behre, K.E. and Kucan, D., 1986. Die Reflektion archaologisch bekannter Siedlungen in Pollendiagrammen verschiedener Entfernung - Beispiele aus der Siedlungskammer Flogeln, Nordwestdeutschland .In: Anthropogenic indicators in pollen diagrams ed. by K.E. Behre (pp.95-114). Balkema, Rotterdam (in German).		Behre, K.E., 1976. Pollenanalytische Untersuchungen zur Vegetations-und Siedlungsgeschichte bei Flogeln und im Ahlenmoor (Elb-Weser-Winkel). Probleme der Kustenforschung im sudlichen Nordseegebiet, 11, pp.101-118 (in German).
AKULININ	AKULININ	AKULININ	10.21233/n3c887	Neotoma (last access: 1 April 2021)	19	19	Akulinin Exposure P1282	47.1167	138.55	20	Asia	Alluvial/Fluvial	Raw	29	AWI	4	4810	44906	1432	40096	Exposure in river terrace. Physiography: river valley in mountains. Surrounding vegetation: secondary Betula forest.	1975-06-18 00:00:00	Anderson, P.M. and Lozhkin, A.V., 2002. Late Quaternary Vegetation and Climate of Siberia and the Russian Far East (Palynological and Radiocarbon Database). North East Science Center, Far East Branch, Russian Academy of Sciences, Magadan, Russia.		Kind, N.V., 1974. Geochronology of the late Anthropogene by isotopic data. Nauka, Moscow (in Russian).		Korotkii, A.M., Karaulova, L.P. and Troitskaya, T.S., 1980. The Quaternary deposits of Primor'ye. Nauka, Novosibirsk (in Russian).		Korotky, A.M., Kovalyukh, N.N. and Volkov, V.G., 1989. Radiocarbon dating of Quaternary deposits (south Far East). Preprint. Far East Branch of the USSR Academy of Sciences, Vladivostok (in Russian).		Korotky, A.M., Pletnev, S.P., Pushkar, V.S., Grebennikova, T.A., Raszhigaeva, N.T., Sahebgareeva, E.D. and Mohova, L.M., 1988. Evolution environment of south Far East (late Pleistocene and Holocene). Nauka, Moscow (in Russian).
AKUV	AKUV	AKUV	10.21233/n37g69	Neotoma (last access: 1 April 2021)	20	20	Akuvaara	69.1233	27.6741	170	Europe	Lake	Raw	34	AWI	5	-23	10745	326.3	10768	Lake. Physiography: Hill of sandy/gravelly outwash. Surrounding vegetation: Thin pine forest.	1973-04-01 00:00:00	Hyvarinen, H., 1975. Absolute and relative pollen diagrams from northernmost Fennoscandia. Fennia-International Journal of Geography, 142(1), pp.1-23.
ALEXLAKE	ALEXLAKE	ALEXLAKE	10.21233/n3f97t	Neotoma (last access: 1 April 2021)	24	24	Alexander Lake	53.3	-60.54	143	North America	Lake	Raw	25	AWI	4	4178	7237	127.5	3059	Physiography: rolling glacial till, eskers, kettles,.	1972-01-01 00:00:00	Jordan, R.H., 1975. Pollen diagrams from Hamilton Inlet, central Labrador, and their environmental implications for the northern Maritime Archaic. Arctic Anthropology, 12(2), pp.92-116.
ALEXISLK	ALEXISLK	ALEXISLK	10.21233/n39m4j	Neotoma (last access: 1 April 2021)	25	25	Alexis Lake	52.5167	-57.0333	200	North America	Lake	Raw	15	AWI	4	-67	27644	1979.4	27711	Lake in Alexis River watershed. Physiography: Mecatina Plateau/Laurentian region. Surrounding vegetation: Black Spruce, Lichen Barrens.		Lamb, H.F., 1978. Post-glacial vegetation change in southeastern Labrador. Master's thesis. University of Minnesota, Minneapolis, Minnesota, USA.
ALIUK	ALIUK	ALIUK	10.21233/n35t17	Neotoma (last access: 1 April 2021)	27	27	Aliuk Pond	54.5833	-57.3667	25	North America	Lake	Raw	9	AWI	2	2323	11207	1110.5	8884	Small glacial scour lake. Physiography: coastal lowlands. Surrounding vegetation: sedge-shrub and lichen-heath tundra.	1972-01-01 00:00:00	Jordan, R.H., 1975. Pollen diagrams from Hamilton Inlet, central Labrador, and their environmental implications for the northern Maritime Archaic. Arctic Anthropology, 12(2), pp.92-116.
ALUT	ALUT	ALUT	10.21233/n36k5n	Neotoma (last access: 1 April 2021)	31	31	Alut Lake	60.14	152.33	480	Asia	Lake	Raw	117	AWI	25	-66	34322	296.4	34388	Tectonic lake. Physiography: valley in mountains. Surrounding vegetation: Larix forest.	1996-07-01 00:00:00	Anderson, P.M. and Lozhkin, A.V., 2002. Late Quaternary Vegetation and Climate of Siberia and the Russian Far East (Palynological and Radiocarbon Database). North East Science Center, Far East Branch, Russian Academy of Sciences, Magadan, Russia.		Anderson, P.M., Lozhkin, A.V., Belaya, B.V. and Stetsenko, T.V., 1998. New data about the stratigraphy of late Quaternary deposits of northern Priokhot'ye. In: Environmental changes in Beringia during the Quaternary ed. by K.V. Simakov (pp.69-87). North East Interdisciplinary Research Institute, Far East Branch, Russian Academy of Sciences, Magadan (in Russian).		Anderson, P.M. and Lozhkin, A.V., 2001. The latest Pleistocene interstade (Karginskii/Boutellier interval) of Beringia: variations in paleoenvironments and implications for paleoclimatic interpretations. Quaternary Science Reviews, 20(1-3), pp.93-125.	https://doi.org/10.1016/S0277-3791(00)00129-3
AMARETE	AMARETE	AMARETE	10.21233/n32s3q	Neotoma (last access: 1 April 2021)	32	32	Amarete	-15.2333	-68.9833	4000	South America	Peat	Raw	15	AWI	2	-60	10281	738.6	10341	Mire.		Graf, K., 1992. Pollendiagramme aus den Anden: Eine Synthese zur Klimageschichte und Vegetationsentwicklung seit der letzten Eiszeit. Physische Geographie 34. Universitat Zurich-Irchel, Geographisches Institut, Zurich, Switzerland (in German).
AMBA	AMBA	AMBA	10.21233/n3j39f	Neotoma (last access: 1 April 2021)	33	33	Amba River Exposure 596	43.3167	131.817	5	Asia	Coast	Raw	8	AWI	3	1613	5706	584.7	4093	Exposure of alluvial and lagoon sediment. Physiography: coastal plain. Surrounding vegetation: Quercus-Carpinus-Abies holophylla forest.	1970-06-17 00:00:00	Anderson, P.M. and Lozhkin, A.V., 2002. Late Quaternary Vegetation and Climate of Siberia and the Russian Far East (Palynological and Radiocarbon Database). North East Science Center, Far East Branch, Russian Academy of Sciences, Magadan, Russia.		Korotky, A.M., Karaulova, L.P. and Troitskaya, T.S., 1980. The Quaternary deposits of Primor'ye. Nauka, Novosibirsk (in Russian).
AMGUEMA1	AMGUEMA1	AMGUEMA1	10.21233/n3110p	Neotoma (last access: 1 April 2021)	68	68	Amguema River Valley Exposure 1	67.75	178.7	175	Asia	Alluvial/Fluvial	Raw	4	AWI	2	1788	25242	7818	23454	Exposure in a mine excavation. Physiography: river valley in glacial outwash. Surrounding vegetation: shrub tundra.		Anderson, P.M. and Lozhkin, A.V., 2002. Late Quaternary Vegetation and Climate of Siberia and the Russian Far East (Palynological and Radiocarbon Database). North East Science Center, Far East Branch, Russian Academy of Sciences, Magadan, Russia.		Kotov, A.N., 1997. Cryolithogenesis in the ablation zone of late Pleistocene glaciers. In: Results of fundamental investigations of the cryosphere of earth in the Arctic and Subarctic, 1996 (pp.249-259). Nauka, Novosibirsk (in Russian).		Lozhkin, A.V., Trumpe, M.A., Polujan, A.I., Kotova, L.N. and Takmazyan, E.D., 1995. Radiocarbon dates for upper Quaternary sequences in northeastern Asia and Alaska. In: History of climate and vegetation in Beringia during the late Cenozoic ed. by Y.M. Bychkov and A.V. Lozhkin (pp.169-184). North East Interdisciplinary Research Institute, Far East Branch, Russian Academy of Sciences, Magadan (in …
AMGUEMA2	AMGUEMA2	AMGUEMA2	10.21233/n3959z	Neotoma (last access: 1 April 2021)	69	69	Amguema River Valley Exposure 2	67.6667	178.6	87	Asia	Alluvial/Fluvial	Raw	8	AWI	2	1888	3039	164.4	1151	Exposure in river bank. Physiography: river valley in glacial outwash. Surrounding vegetation: shrub tundra.		Anderson, P.M. and Lozhkin, A.V., 2002. Late Quaternary Vegetation and Climate of Siberia and the Russian Far East (Palynological and Radiocarbon Database). North East Science Center, Far East Branch, Russian Academy of Sciences, Magadan, Russia.		Kotov, A.N., 1997. Cryolithogenesis in the ablation zone of late Pleistocene glaciers. In: Results of fundamental investigations of the cryosphere of earth in the Arctic and Subarctic, 1996 (pp.249-259). Nauka, Novosibirsk (in Russian).		Lozhkin, A.V., Trumpe, M.A., Polujan, A.I., Kotova, L.N. and Takmazyan, E.D., 1995. Radiocarbon dates for upper Quaternary sequences in northeastern Asia and Alaska. In: History of climate and vegetation in Beringia during the late Cenozoic ed. by Y.M. Bychkov and A.V. Lozhkin (pp.169-184). North East Interdisciplinary Research Institute, Far East Branch, Russian Academy of Sciences, Magadan (in …
AMTKEL	AMTKEL	AMTKEL	10.21233/n3cc88	Neotoma (last access: 1 April 2021)	200	200	Amtkel	43.2681	41.3083	1830	Europe	Alluvial/Fluvial	Raw	14	AWI	3	123	2048	148.1	1925	Lower part of glacial trough. Physiography: Head of river Amtkel. Surrounding vegetation: Subalpine beech elfin woodland.	1982-08-01 00:00:00	Kvavadze, E.V. and Rukhadze, L.P., 1989. Vegetation and climate of the Holocene of Abkhazia. Metsniereba, Tbilisi, Georgia. Scientific and Publishing Council of the Georgian SSR Academy of Sciences, p.136 (in Russian).		Kvavadze, E.V., Rukhadze, L.P., Tretyak, P.R. and Petrenko, L.V., 1987. On the migration on high-mountain vegetation belts in the late Holocene in the valley of the Amtqel River (Abkhazia). Bulletin of the Georgian Academy of Sciences, 125(2), pp.421-424.	https://doi.org/10.1594/PANGAEA.738965
ANDERSLK	ANDERSLK	ANDERSLK	10.21233/n33w32	Neotoma (last access: 1 April 2021)	202	202	Anderson Lake	46.4167	-92.7167	339	North America	Lake	Raw	24	AWI	4	11693	12647	41.5	954	Physiography: Nickerson Moraine. Surrounding vegetation: maple-basswood, Juglans cinerea.		Wright Jr, H.E. and Watts, W.A., 1969. Glacial and vegetational history of northeastern Minnesota. Special Publications Series 11. Minnesota Geological Survey, University of Minnesota, Minneapolis, Minnesota, USA.		Stuiver, M., 1969. Yale natural radiocarbon measurements IX. Radiocarbon, 11(2), pp.545-658.	https://doi.org/10.1017/S0033822200011413
ANDERSON	ANDERSON	ANDERSON	10.21233/n30302	Neotoma (last access: 1 April 2021)	203	203	Anderson Pond	36.03	-85.5	303	North America	Lake	Raw	60	AWI	10	-42	30146	511.7	30188		1976-01-01 00:00:00	Delcourt, H.R., 1979. Late Quaternary vegetation history of the eastern Highland Rim and adjacent Cumberland Plateau of Tennessee. Ecological Monographs, 49(3), pp.255-280.	https://doi.org/10.2307/1942485
ANDREE	ANDREE	ANDREE	10.21233/n3fd53	Neotoma (last access: 1 April 2021)	204	204	Andree Bog	45.725	-93.25	300	North America	Peat	Raw	20	AWI	4	9575	13447	203.8	3872	Shallow irregular peat deposit. Physiography: gently rolling ground moraine. Surrounding vegetation: sedge meadow and shrub-carr.		Cushing, E.J., 1967. Late-Wisconsin pollen stratigraphy and the glacial sequence in Minnesota. In: Quaternary paleoecology ed. by E.J. Cushing and H.E. Wright Jr (pp.59-88). Yale University Press, New Haven, Connecticut, USA.		Cushing, E.J., 1963. Late-Wisconsin pollen stratigraphy in east-central Minnesota. Doctoral dissertation. University of Minnesota, Minneapolis, Minnesota, USA.		Cushing, E.J., 1964. Redeposited pollen in Late Wisconsin pollen spectra from east-central Minnesota. American Journal of Science, 262(9), pp.1075-1088.	https://doi.org/10.2475/ajs.262.9.1075
ANDRUSC2	ANDRUSC2	ANDRUSC2	10.21233/n39q4k	Neotoma (last access: 1 April 2021)	205	205	Andrus Lake	46.7017	-85.039	190	North America	Lake	Raw	13	AWI	26	-34.2	156.5	15.9	190.8	Seepage lake. Physiography: flat sandy glacial lake bottom. Surrounding vegetation: Pinus/Betula/Quercus/Acer.	1984-02-15 00:00:00	Charles, D.F. and Whitehead, D.R., 1984. Paleoecological Investigation of Recent Lake Acidification (PIRLA): December 1984 Status Report. RP 2174-10, Electric Power Research Institute, Palo Alto, CA.		Charles, D.F. and Whitehead, D.R., 1986. Paleoecological Investigation of Recent Lake Acidification (PIRLA): Methods and Project Description. EPRI EA-4906, Electric Power Research Institute, Palo Alto, CA.		Shane, L.C., 1987. Northern Great Lakes States pollen and charcoal data. PIRLA Unpublished Report Series 9, Indiana University, Bloomington, IN.		Kingston, J.C., Cook, R.B., Kreis, R.G., Camburn, K.E., Norton, S.A., Sweets, P.R., Binford, M.W., Mitchell, M.J., Schindler, S.C., Shane, L.C.K. and King, G.A., 1990. Paleoecological investigation of recent lake acidification in the northern Great Lakes states. Journal of Paleolimnology, 4(2), pp.153-201.	https://doi.org/10.1007/BF00226322	Charles, D.F. and Whitehead, D.R., 1987. The PIRLA project: paleoecological investigations of recent lake acidification. Hydrobiologia, 143, pp.13-20.	https://doi.org/10.1007/BF00026639
ANDYLAKE	ANDYLAKE	ANDYLAKE	10.21233/n35x18	Neotoma (last access: 1 April 2021)	206	206	Andy Lake	64.64	-128.08	1360	North America	Lake	Raw	57	AWI	4	-66	13049	234.2	13115	Lake dammed by a Mountain River moraine. Physiography: Mackenzie Mountains. Surrounding vegetation: shrub tundra.	1990-04-01 00:00:00	Szeicz, J.M., MacDonald, G.M. and Duk-Rodkin, A., 1995. Late Quaternary vegetation history of the central Mackenzie Mountains, Northwest Territories, Canada. Palaeogeography, Palaeoclimatology, Palaeoecology, 113(2-4), pp.351-371.	https://doi.org/10.1016/0031-0182(95)00070-3
ANGAL	ANGAL	ANGAL	10.21233/n3bc8z	Neotoma (last access: 1 April 2021)	207	208	Angal Lake	67.13	-153.9	820	North America	Lake	Raw	37	AWI	3	-51	17051	475.1	17102	Cirque lake. Physiography: mountainous. Surrounding vegetation: Betula shrub tundra.	1979-08-01 00:00:00	Brubaker, L.B., Garfinkee, H.L. and Edwards, M.E., 1983. A late Wisconsin and Holocene vegetation history from the central Brooks Range: implications for Alaskan palaeoecology. Quaternary Research, 20(2), pp.194-214.	https://doi.org/10.1016/0033-5894(83)90077-7
ANGE	ANGE	ANGE	10.21233/n36k61	Neotoma (last access: 1 April 2021)	208	209	Lac à l'Ange	47.48	-70.68	648	North America	Lake	Raw	57	AWI	8	-59	15915	285.2	15974	Rock basin with steep sides. Physiography: rugged mountainous morainic area. Surrounding vegetation: Betulo papyriferae - Abietetum.	1977-01-01 00:00:00	Labelle, C. and Richard, P.J.H., 1981. Vegetation tardiglaciaire et postglaciaire au sud-est du parc des Laurentides, Quebec. Geographie physique et Quaternaire, 35(3), pp.345-359 (in French).	https://doi.org/10.7202/1000544ar
ANTELOPE	ANTELOPE	ANTELOPE	10.21233/n32w2c	Neotoma (last access: 1 April 2021)	209	210	Antelope Playa	43.5	-105.45	1450	North America	Alluvial/Fluvial	Raw	25	AWI	3	-54	16494	689.5	16548	Small playa. Physiography: Powder River Basin. Surrounding vegetation: Artemisia tridentata grassland.	1982-03-01 00:00:00	Markgraf, V. and Lennon, T., 1986. Paleoenvironmental history of the last 13,000 years of the eastern Powder River Basin, Wyoming, and its implications for prehistoric cultural patterns. Plains Anthropologist, 31(111), pp.1-12.	https://doi.org/10.1080/2052546.1986.11909310
AQUIRI	AQUIRI	AQUIRI	10.21233/n3j69g	Neotoma (last access: 1 April 2021)	211	212	Lago do Aquiri	-3.16	-45.01	10	South America	Lake	Raw	27	AWI	3	7140	8278	43.8	1138	Natural lake, sometimes flooded by river. Physiography: soft rolling area with flood plains. Surrounding vegetation: anthropog. palm forest, swamp savanna.	1994-05-20 00:00:00	Behling, H. and da Costa, M.L., 1997. Studies on Holocene tropical vegetation, mangrove and coast environments in the state of Maranhao, NE Brazil. Quaternary of South America and Antarctic Peninsula, 10(7), pp.93-118.
ARRINGTO	ARRINGTO	ARRINGTO	10.21233/612s-t274	Neotoma (last access: 1 April 2021)	213	214	Arrington Marsh	39.495	-95.5267	280	North America	Peat	Raw	26	AWI	2	19368	29163	391.8	9795	Spring marsh along edge of floodplain. Physiography: floodplain edge of the Delaware River.		Gruger, J., 1973. Studies on the late Quaternary vegetation history of northeastern Kansas. Geological Society of America Bulletin, 84(1), pp.239-250.	https://doi.org/10.1130/0016-7606(1973)84<239:SOTLQV>2.0.CO;2
ARTSLOUG	ARTSLOUG	ARTSLOUG	10.21233/n34x3q	Neotoma (last access: 1 April 2021)	214	215	Arts Lough	52.95	-6.43333	490	Europe	Peat	Raw	30	AWI	6	647	12245	399.9	11598	Eroding blanket peat. Physiography: Steep cliffs to south rising to 800m. Surrounding vegetation: Heathland vegetation.		Bradshaw, R.H.W. and McGee, E., 1988. The extent and time-course of mountain blanket peat erosion in Ireland. New Phytologist, 108(2), pp.219-224.	https://doi.org/10.1111/j.1469-8137.1988.tb03699.x
ATO	ATO	ATO	10.21233/n31w22	Neotoma (last access: 1 April 2021)	217	219	Lac des Atocas	45.54	-73.31	114	North America	Lake	Raw	46	AWI	4	-59	14076	314.1	14135	Rock basin lake with marginal bog. Physiography: Hilly moraine. Surrounding vegetation: Caryo - Aceretum sacchari.	1979-06-08 00:00:00	Gauthier, R., 1981. Histoire de la colonisation vegetale postglaciaire des Monteregiennes: deux sites du mont Saint-Bruno. Master's thesis. Universite de Montreal, Montreal, Quebec, Canada (in French).
AXELAKE	AXELAKE	AXELAKE	10.21233/n3h68s	Neotoma (last access: 1 April 2021)	219	221	Axe Lake	45.39	-79.5	323	North America	Lake	Raw	37	AWI	3	-16	11380	316.6	11396
BAIRDIN	BAIRDIN	BAIRDIN	10.21233/n3410m	Neotoma (last access: 1 April 2021)	222	224	Baird Inlet [Rock Basin Lake]	78.4917	-76.78	295	North America	Lake	Raw	23	AWI	3	-28	11543.5	526	11571.5	Closed steep sided ice excavated basin. Physiography: granulite gneiss massif, valley glaciers. Surrounding vegetation: Empetrum/Vaccinium heath, mossy heaths.	1979-01-01 00:00:00	Hyvarinen, H., 1985. Holocene pollen stratigraphy of Baird Inlet, east-central Ellesmere Island, arctic Canada. Boreas, 14(1), pp.19-32.	https://doi.org/10.1111/j.1502-3885.1985.tb00884.x
BALLIN	BALLIN	BALLIN	10.21233/n30684	Neotoma (last access: 1 April 2021)	223	225	Ballinloghig Lake	52.19	-10.31	84	Europe	Lake	Raw	68	AWI	12	1425	17609	241.6	16184	Lake with marginal fen. Physiography: Southern slope of Slieve Mish mountains. Surrounding vegetation: Blanket bog, heath, pasture and woodland.		Barnosky, C.W., 1988. A late-glacial and post-glacial pollen record from the Dingle Peninsula, County Kerry. Proceedings of the Royal Irish Academy, 88(B), pp.23-37.
BALLYBET	BALLYBET	BALLYBET	10.21233/n38c8b	Neotoma (last access: 1 April 2021)	224	226	Ballybetagh	53.1667	-6.25	250	Europe	Peat	Raw	36	AWI	6	11115	15708	131.2	4593	Spring-fed marsh or spring. Physiography: On the edge of the Dublin mountains.		Cwynar, L.C. and Watts, W.A., 1989. Accelerator-mass spectrometer ages for late-glacial events at Ballybetagh, Ireland. Quaternary Research, 31(3), pp.377-380.	https://doi.org/10.1016/0033-5894(89)90044-6	Jessen, K. and Farrington, A., 1938. The bogs at Ballybetagh, near Dublin, with remarks on late-glacial conditions in Ireland. Proceedings of the Royal Irish Academy, 44B(10), pp.205-260.		Watts, W.A., 1977. The late Devensian vegetation of Ireland. Philosophical Transactions of the Royal Society of London. B, Biological Sciences, 280(972), pp.273-293.	https://doi.org/10.1098/rstb.1977.0110
BARABA	BARABA	BARABA	10.21233/n30w34	Neotoma (last access: 1 April 2021)	228	230	Lower Barabaschevka River Exposure 594	43.1333	131.6	5	Asia	Alluvial/Fluvial	Raw	6	AWI	2	4853	10240	1077.4	5387	Exposure in alluvium-marine terrace. Physiography: lower river valley. Surrounding vegetation: Quercus-Carpinus-Abies holophylla forest.	1970-06-17 00:00:00	Anderson, P.M. and Lozhkin, A.V., 2002. Late Quaternary Vegetation and Climate of Siberia and the Russian Far East (Palynological and Radiocarbon Database). North East Science Center, Far East Branch, Russian Academy of Sciences, Magadan, Russia.		Korotky, A.M., Karaulova, L.P. and Troitskaya, T.S., 1980. The Quaternary deposits of Primor'ye. Nauka, Novosibirsk (in Russian).
BARCHAMP	BARCHAMP	BARCHAMP	10.21233/n3bh7z	Neotoma (last access: 1 April 2021)	229	232	Barchampe Lake	30.63	-83.25	34	North America	Lake	Raw	64	AWI	2	-37	8514	135.7	8551	Sinkhole pond. Physiography: Gulf Coastal Plain, level. Surrounding vegetation: pine/oak forest.	1986-03-20 00:00:00
BARRETT	BARRETT	BARRETT	10.21233/n36q51	Neotoma (last access: 1 April 2021)	231	234	Barrett Lake	37.6	-119.01	2816	North America	Lake	Raw	38	AWI	5	-61	15366	416.9	15427	Glacial scour lake. Physiography: Sierra Nevada mountains. Surrounding vegetation: lodgepole/limber pine, mountain hemlock.		Anderson, R.S., 1987. Late-Quaternary environments of the Sierra Nevada, California. Doctoral dissertation. University of Arizona, Tucson, Arizona, USA.		Anderson, R.S., 1990. Holocene forest development and paleoclimates within the central Sierra Nevada, California. Journal of Ecology, 78(2), pp.470-489.	https://doi.org/10.2307/2261125
BASEBALL	BASEBALL	BASEBALL	10.21233/n3c59k	Neotoma (last access: 1 April 2021)	233	236	Baseball Bog	47.23	-79.78	292	North America	Lake	Raw	40	AWI	2	11	11860	303.8	11849
BASTIEN	BASTIEN	BASTIEN	10.21233/n33p4c	Neotoma (last access: 1 April 2021)	235	238	Lac Bastien	46.4	-78.9167	305	North America	Lake	Raw	67	AWI	5	-37	10722	163	10759	Glacial scour lake. Physiography: Canadian Shield. Surrounding vegetation: fir-maple-spruce-birch forest.	1985-01-01 00:00:00	Bennett, K.D., 1987. Holocene history of forest trees in southern Ontario. Canadian Journal of Botany, 65(9), pp.1792-1801.	https://doi.org/10.1139/b87-248
BATLGRND	BATLGRND	BATLGRND	10.21233/n3002s	Neotoma (last access: 1 April 2021)	236	239	Battle Ground Lake	45.8	-122.49	155	North America	Lake	Raw	105	AWI	15	-40	24274	233.8	24314	Volcanic crater. Physiography: Puget Trough. Surrounding vegetation: second-growth Pseudotsuga/decid forest.	1980-10-01 00:00:00	Barnosky, C.W., 1983. Late-Quaternary vegetational and climatic history of southwestern Washington. Doctoral dissertation. University of Washington, Seattle, Washingtion, USA.		Barnosky, C.W., 1985. Late Quaternary vegetation near Battle Ground Lake, southern Puget Trough, Washington. Geological Society of America Bulletin, 96(2), pp.263-271.	https://doi.org/10.1130/0016-7606(1985)96<263:LQVNBG>2.0.CO;2	Whitlock, C., 1992. Vegetational and climatic history of the Pacific Northwest during the last 20,000 years: implications for understanding present-day biodiversity. Northwest Environmental Journal, 8, pp.5-28.
BATTAGLI	BATTAGLI	BATTAGLI	10.21233/n3f986	Neotoma (last access: 1 April 2021)	237	240	Battaglia Bog	41.1439	-81.3286	335	North America	Peat	Raw	14	AWI	3	11707	20212	654.2	8505	Small fen in interlobate area. Physiography: Allegheny Plateau. Surrounding vegetation: agriculturally disturbed.	1973-01-01 00:00:00	Shane, L.C., 1975. Palynology and Radiocaron Chronology of Battaglia Bog, Portage County, Ohio. The Ohio Journal of Science, 75(2), pp.96-102.		Shane, L.C., 1987. Late-glacial vegetational and climatic history of the Allegheny Plateau and the Till Plains of Ohio and Indiana, USA. Boreas, 16(1), pp.1-20.	https://doi.org/10.1111/j.1502-3885.1987.tb00750.x	Shane, L.C. and Anderson, K.H., 1993. Intensity, gradients and reversals in late glacial environmental change in east-central North America. Quaternary Science Reviews, 12(5), pp.307-320.	https://doi.org/10.1016/0277-3791(93)90039-O
BEARBOG	BEARBOG	BEARBOG	10.21233/n36g60	Neotoma (last access: 1 April 2021)	242	245	Bear Bog	47.18	-80.16	304	North America	Peat	Raw	27	AWI	3	4131	11136	269.4	7005	Bog.	1991-01-01 00:00:00	Gordon, D.L. and McAndrews, J.H., 1992. Field testing a model of paleohydrology for prehistoric site prediction at Lake Temagami, northeastern Ontario. Annual Archaeological Report, Ontario, 3, pp.80-86.
BEEFPAST	BEEFPAST	BEEFPAST	10.21233/n34t3p	Neotoma (last access: 1 April 2021)	246	250	Beef Pasture	37.4731	-108.16	3060	North America	Peat	Raw	91	AWI	10	-24	6033	67.3	6057	Open wet meadow and fen occupying a depression formed by a landslide ~5000 BP in the La Plata Mountains. Local upland vegetation dominated by Picea engelmannii, Pseudotsuga menziesii, Populus tremuloides, and Alnus tenuifolia. Salix brachycarpa lines the edges of the wet meadow.	1973-08-17 00:00:00	Petersen, K.L., 1988. Climate and the Dolores River Anasazi: a paleoenvironmental reconstruction from a 10,000-year pollen record, La Plata Mountains, Southwestern Colorado. University of Utah, Anthropological Papers 113. University of Utah Pres, Salt Lake City, Utah, USA.		Petersen, K.L., 1985. Palynology in Montezuma County, southwestern Colorado: the local history of the Pinyon Pine (Pinus edulis). In: Late Quaternary Vegetation and Climates in the American Southwest. Contribution Series 16. ed. by B.F. Jacobs, P.L. Fall, and O.K. Davis (pp.47-62). American Association of Stratigraphic Palynologists, Dallas, Texas, USA.		Petersen, K.L., 1994. A warm and wet Little Climatic Optimum and a cold and dry Little Ice Age in the southern Rocky Mountains, USA. Climatic Change, 26(2), pp.243-269.	https://doi.org/10.1007/BF01092417
BEGASWAM	BEGASWAM	BEGASWAM	10.21233/n39890	Neotoma (last access: 1 April 2021)	247	252	Bega Swamp	-36.5167	149.5	1080	Indopacific	Peat	Raw	489	AWI	39	-45.2	14487	29.8	14532.2			Donders, T.H., Haberle, S.G., Hope, G., Wagner, F. and Visscher, H., 2007. Pollen evidence for the transition of the Eastern Australian climate system from the post-glacial to the present-day ENSO mode. Quaternary Science Reviews, 26(11-12), pp.1621-1637.	https://doi.org/10.1016/j.quascirev.2006.11.018	Hope, G., Kershaw, A.P., van der Kaars, S., Xiangjun, S., Liew, P.M., Heusser, L.E., Takahara, H., McGlone, M., Miyoshi, N. and Moss, P.T., 2004. History of vegetation and habitat change in the Austral-Asian region. Quaternary International, 118, pp.103-126.	https://doi.org/10.1016/S1040-6182(03)00133-2	Green, D., Singh, G., Polach, H., Moss, D., Banks, J. and Geissler, E.A., 1988. A fine-resolution palaeoecology and palaeoclimatology from south-eastern Australia. Journal of Ecology, 76(3), pp.790-806.	https://doi.org/10.2307/2260574	Hope, G.S., 1995. Robustness and sensitivity of pollen data-a high resolution record from Bega Swamp. Proceedings of the Climate Change Conference, University of Melbourne and the Australian Quaternary Association, pp.6-8.		Polach, H. and Singh, G., 1980. Contemporary 14C levels and their significance to sedimentary history of Bega Swamp, New South Wales. Radiocarbon, 22(2), pp.398-409.	https://doi.org/10.1017/S0033822200009693
BELLS	BELLS	BELLS	10.21233/n35g6p	Neotoma (last access: 1 April 2021)	248	253	Bell's Lake	65.0167	-127.483	580	North America	Lake	Raw	53	AWI	5	-57	12638	244.1	12695	Ground moraine depression. Physiography: Mackenzie Mountains. Surrounding vegetation: open Picea muskeg and forest.	1990-04-01 00:00:00	Szeicz, J.M., MacDonald, G.M. and Duk-Rodkin, A., 1995. Late Quaternary vegetation history of the central Mackenzie Mountains, Northwest Territories, Canada. Palaeogeography, Palaeoclimatology, Palaeoecology, 113(2-4), pp.351-371.	https://doi.org/10.1016/0031-0182(95)00070-3
BELMONT	BELMONT	BELMONT	10.21233/n31s4s	Neotoma (last access: 1 April 2021)	249	254	Belmont Bog	42.25	-77.9167	497	North America	Peat	Raw	46	AWI	7	73	19718	436.6	19645		1973-01-01 00:00:00	Spear, R.W. and Miller, N.G., 1976. A radiocarbon dated pollen diagram from the Allegheny Plateau of New York State. Journal of the Arnold Arboretum, 57(3), pp.369-403.
BELSKALA	BELSKALA	BELSKALA	10.21233/n3h402	Neotoma (last access: 1 April 2021)	251	256	Belaya Skala Exposure	43.25	134.567	4	Asia	Coast	Raw	14	AWI	3	357	6845	499.1	6488	Lagoon terrace. Physiography: coastal plain. Surrounding vegetation: Quercus mongolica-Betula forest.	1986-06-18 00:00:00	Anderson, P.M. and Lozhkin, A.V., 2002. Late Quaternary Vegetation and Climate of Siberia and the Russian Far East (Palynological and Radiocarbon Database). North East Science Center, Far East Branch, Russian Academy of Sciences, Magadan, Russia.		Korotky, A.M. and Karaulova, L.P., 1975. New data about the stratigraphy of Quaternary deposits of Primor'ye. In: Questions of geomorphology and Quaternary geology of the southern Far East ed. by A.M. Korotky and A.P. Kulakov (pp.79-110). Far Eastern Branch, USSR Academy of Sciences, Vladivostok (in Russian).		Korotky, A.M., Karaulova, L.P. and Troitskaya, T.S., 1980. The Quaternary deposits of Primor'ye. Nauka, Novosibirsk (in Russian).
BER_neotoma	BER_neotoma	BER	10.21233/n37m4x	Neotoma (last access: 1 April 2021)	252	258	Bereziuk	54.0472	-76.1203	205	North America	Lake	Raw	24	AWI	3	19	8600	373.1	8581	Rock basin lake. Physiography: rolling moraine. Surrounding vegetation: Cladino - Piceetum marianae.	1977-07-06 00:00:00	Richard, P.J.H., 1979. Contribution a l'histoire postglaciaire de la vegetation au nord-est de la Jamesie, Nouveau-Quebec. Geographie physique et Quaternaire, 33(1), pp.93-112 (in French).	https://doi.org/10.7202/1000324ar
Indigirka_Lowland	BER1IND	BER1IND	10.21233/n33t20	Neotoma (last access: 1 April 2021)	253	259	Berelyekh River, Indigirka Lowland	70.5833	145	20	Asia	Alluvial/Fluvial	Raw	16	AWI	6	8515	20446	795.4	11931	Exposure on river terrace. Physiography: river valley. Surrounding vegetation: shrub tundra.		Anderson, P.M. and Lozhkin, A.V., 2002. Late Quaternary Vegetation and Climate of Siberia and the Russian Far East (Palynological and Radiocarbon Database). North East Science Center, Far East Branch, Russian Academy of Sciences, Magadan, Russia.		Lozhkin, A.V., 1977. Environment of the Berelyekh mammoth population. In: Mammoth fauna of the Russian plain and Eastern Siberia ed. by O.A. Skarlato (pp.67-68). Zoological Institute, USSR Academy of Sciences, Leningrad (in Russian).		Lozhkin, A.V., 1998. Questions concerning radiocarbon data and palynological characteristics of the mammoth burials, Berelyekh River, lower Indigirka drainage. In: Environmental changes in Beringia during the Quaternary ed. by K.V. Simakov (pp.45-62). North East Interdisciplinary Research Institute, Far East Branch, Russian Academy of Sciences, Magadan (in Russian).		Vereschagin, N.K., 1977. Berelyekh mammoth "cemetery". In: Mammoth fauna of the Russian plain and Eastern Siberia ed. by O.A. Skarlato (pp.5-50). Zoological Institute, USSR Academy of Sciences, Leningrad (in Russian).
BERRYPND	BERRYPND	BERRYPND	10.21233/n3040d	Neotoma (last access: 1 April 2021)	254	260	Berry Pond	42.51	-73.32	600	North America	Lake	Raw	42	AWI	16	218	11567	276.8	11349		1965-10-01 00:00:00	Whitehead, D.R., 1979. Late-glacial and postglacial vegetational history of the Berkshires, western Massachusetts. Quaternary Research, 12(3), pp.333-357.	https://doi.org/10.1016/0033-5894(79)90033-4	Whitehead, D.R. and Crisman, T.L., 1978. Paleolimnological studies of small New England (USA) ponds. Part I. Late-glacial and postglacial trophic oscillations. Polskie Archiwum Hydrobiologii, 25, pp.471-481.
BETENK	BETENK	BETENK	10.21233/n38889	Neotoma (last access: 1 April 2021)	255	261	Betenkyos Exposure, Adycha River	67.6667	135.583	135	Asia	Alluvial/Fluvial	Raw	10	AWI	3	-61	2967	336.4	3028	Floodplain exposure. Physiography: river valley. Surrounding vegetation: open Larix dahurica forest.		Anderson, P.M. and Lozhkin, A.V., 2002. Late Quaternary Vegetation and Climate of Siberia and the Russian Far East (Palynological and Radiocarbon Database). North East Science Center, Far East Branch, Russian Academy of Sciences, Magadan, Russia.
BI74MS11	BI74MS11	BI74MS11	10.21233/n32t32	Neotoma (last access: 1 April 2021)	261	267	Banks Island 74MS11	71.76	-124.24	30	North America	Lake	Raw	55	AWI	3	-50	12691	235.9	12741	Small coastal kettle lake. Physiography: ice-contact sediments, Carpenter Till.		Gajewski, K., Mott, R.J., Ritchie, J.C. and Hadden, K., 2000. Holocene vegetation history of Banks Island, Northwest Territories, Canada. Canadian Journal of Botany, 78(4), pp.430-436.	https://doi.org/10.1139/b00-018
BI74MS12	BI74MS12	BI74MS12	10.21233/n3c31v	Neotoma (last access: 1 April 2021)	262	268	Banks Island 74MS12	72.37	-119.84	220	North America	Lake	Raw	33	AWI	3	257	12259	375.1	12002	Small upland kettle lake. Physiography: morainal deposits of Jesse Till.		Gajewski, K., Mott, R.J., Ritchie, J.C. and Hadden, K., 2000. Holocene vegetation history of Banks Island, Northwest Territories, Canada. Canadian Journal of Botany, 78(4), pp.430-436.	https://doi.org/10.1139/b00-018
BI74MS15	BI74MS15	BI74MS15	10.21233/n37880	Neotoma (last access: 1 April 2021)	263	269	Banks Island 74MS15	73.5344	-120.209	120	North America	Lake	Raw	62	AWI	4	70	13085	213.4	13015	Small lake in depression in Baker Till. Physiography: morainal deposits of Baker Till.		Gajewski, K., Mott, R.J., Ritchie, J.C. and Hadden, K., 2000. Holocene vegetation history of Banks Island, Northwest Territories, Canada. Canadian Journal of Botany, 78(4), pp.430-436.	https://doi.org/10.1139/b00-018
BIGJOHN	BIGJOHN	BIGJOHN	10.21233/n3jx1p	Neotoma (last access: 1 April 2021)	266	272	Big John Pond	47.5592	-94.9708	421	North America	Lake	Raw	12	AWI	4	-39	5732	524.6	5771	Lake in pitted outwash plain. Physiography: Bemidji Sand Plain (glacial outwash). Surrounding vegetation: Pinus banksiana forest.	1981-02-05 00:00:00	Almendinger, J.C., 1992. The late Holocene history of prairie, brush-prairie, and jack pine (Pinus banksiana) forest on outwash plains, north-central Minnesota, USA. The Holocene, 2(1), pp.37-50.	https://doi.org/10.1177/095968369200200105	Almendinger, J.C., 1985. The late-Holocene development of jack pine forests on outwash plains, north-central Minnesota. Doctoral dissertation. University of Minnesota, Minneapolis, Minnesota, USA.
BILLYS	BILLYS	BILLYS	10.21233/n39d67	Neotoma (last access: 1 April 2021)	269	275	Billy's Lake	46.2706	-94.5516	383	North America	Lake	Raw	77	AWI	6	-27	11693	154.2	11720	Shallow depression on St. Croix moraine. Physiography: rugged relief. Surrounding vegetation: white pine/hardwoods.	1974-03-01 00:00:00	Jacobson Jr, G.L., 1975. A palynological study of the history and ecology of white pine in Minnesota. Doctoral dissertation. University of Minnesota, Minneapolis, Minnesota, USA.		Bender, M.M., Bryson, R.A. and Baerreis, D.A., 1977. University of Wisconsin radiocarbon dates XIV. Radiocarbon, 19(1), pp.127-137.	https://doi.org/10.1017/S0033822200003404	Jacobson Jr, G.L., 1979. The palaeoecology of white pine (Pinus strobus) in Minnesota. Journal of Ecology, 67(2), pp.697-726.	https://doi.org/10.2307/2259121	Jacobson Jr, G.L. and Grimm, E.C., 1986. A Numerical Analysis of Holocene Forest and Prairie Vegetation in Central Minnesota: Ecological Archives. Ecology, 67(4), pp.958-966.	https://doi.org/10.2307/1939818	Steventon, R.L. and Kutzbach, J.E., 1983. University of Wisconsin radiocarbon dates XX. Radiocarbon, 25(1), pp.152-168.	https://doi.org/10.1017/S0033822200005348
BLACKPND	BLACKPND	BLACKPND	10.21233/n31x2d	Neotoma (last access: 1 April 2021)	272	278	Black Pond	35.62	-84.19	262	North America	Lake	Raw	43	AWI	2	-28	2779	66.8	2807	Spring-fed sinkhole pond. Physiography: ridge and valley province. Surrounding vegetation: oak-hickory forest.	1982-07-01 00:00:00	Cridlebaugh, P.A., 1984. American Indian and Euro-American impact upon Holocene vegetation in the Lower Little Tennessee River Valley, East Tennessee. Doctoral dissertation. University of Tennessee, Knoxville, Tennessee, USA.		Delcourt, P.A., Delcourt, H.R., Cridlebaugh, P.A. and Chapman, J., 1986. Holocene ethnobotanical and paleoecological record of human impact on vegetation in the Little Tennessee River Valley, Tennessee. Quaternary Research, 25(3), pp.330-349.	https://doi.org/10.1016/0033-5894(86)90005-0
BLAKTAIL	BLAKTAIL	BLAKTAIL	10.21233/n3b305	Neotoma (last access: 1 April 2021)	273	279	Blacktail Pond	44.9561	-110.601	2012	North America	Lake	Raw	56	AWI	4	-22	16816	306.1	16838	Blacktail Pond is situated in a remnant late-Pleistocene meltwater channel; surrounding vegetation is Pseudotsuga menziesii (Douglas-fir) parkland, which includes grassland and steppe communities dominated by Artemisia tridentata (big sagebrush), Festuca idahoensis (Idaho fescue), and Ericameria nauseosa (rabbitbrush).	1970-08-01 00:00:00	Gennett, J.A., 1977. Palynology and paleoecology of sediments from Blacktail Pond, northern Yellowstone Park, Wyoming. Master's thesis. University of Iowa, Iowa City, Iowa, USA.		Gennett, J.A. and Baker, R.G., 1986. A late quaternary pollen sequence from blacktail pond, Yellowstone national park, Wyoming, USA. Palynology, 10(1), pp.61-71.	https://doi.org/10.1080/01916122.1986.9989303
BLBIGBEE	BLBIGBEE	BLBIGBEE	10.21233/n32k5d	Neotoma (last access: 1 April 2021)	275	281	BL-Tombigbee	33.5633	-88.4744	49	North America	Peat	Raw	29	AWI	5	-40	13348	478.1	13388
BLUELAKE	BLUELAKE	BLUELAKE	10.21233/n34m6r	Neotoma (last access: 1 April 2021)	279	285	Blue Lake	-36.4	148.31	1890	Indopacific	Lake	Raw	43	AWI	10	216	15333	359.9	15117	Glacial lake 40m deep. Physiography: mountainous. Surrounding vegetation: Alpine heath and scrub.	1971-02-01 00:00:00	Raine, J.I. 1974. Pollen sedimentation in relation to Quaternary vegetation history of the Snowy Mountains of New South Wales. Doctoral dissertation. Australian National University, Canberra, Australia.		Raine, J.I., 1982. Dimictic thermal regime and morphology of Blue Lake in the Snowy Mountains of New South Wales. Marine and Freshwater Research, 33(6), pp.1119-1122.	https://doi.org/10.1071/mf9821119
BLUMOUND	BLUMOUND	BLUMOUND	10.21233/n30x23	Neotoma (last access: 1 April 2021)	281	287	Blue Mounds Creek	43.0833	-89.8667	335	North America	Lake	Raw	38	AWI	5	-59	12145	329.8	12204			Davis, A.M., 1977. The prairie-deciduous forest ecotone in the upper middle west. Annals of the Association of American Geographers, 67(2), pp.204-213.	https://doi.org/10.1111/j.1467-8306.1977.tb01133.x
BOAVISTA	BOAVISTA	BOAVISTA	10.21233/n33q4q	Neotoma (last access: 1 April 2021)	288	294	Serra da Boa Vista	-27.7	-49.15	1160	South America	Peat	Raw	38	AWI	4	-38	17887	484.5	17925	Peat bog. Physiography: situated on a small slope. Surrounding vegetation: grassland.	1989-05-04 00:00:00	Behling, H., 1993. Untersuchungen zur spatpleistozanen und holozanen Vegetations- und Klimageschichte der tropischen Kustenwalder und der Araukarienwalder in Santa Catarina (Sudbrasilien). Dissertationes Botanicae 206. J Cramer, Berlin Stuttgart, Germany (in German).		Behling, H., 1995. Investigations into the Late Pleistocene and Holocene history of vegetation and climate in Santa Catarina (S Brazil). Vegetation History and Archaeobotany, 4(3), pp.127-152.	https://doi.org/10.1007/BF00203932	Ledru, M.P., Behling, H., Fournier, M., Martin, L. and Servant, M., 1994. Localisation de la foret d'Araucaria du Bresil au cours de l'Holocene. Implications paleoclimatiques. Comptes rendus de l'Academie des sciences. Serie 3, Sciences de la vie, 317(6), pp.517-521 (in French).
BOGD	BOGD	BOGD	10.21233/n30k65	Neotoma (last access: 1 April 2021)	292	298	Bog D Pond	47.1775	-95.1627	460	North America	Lake	Raw	49	AWI	6	-40	13206	276	13246	Linear bog with pond. Physiography: Twin Lakes bog complex. Surrounding vegetation: Carex/Larix/Picea.		McAndrews, J.H., 1966. Postglacial history of prairie, savanna, and forest in northwestern Minnesota. Memoirs of the Torrey Botanical Club, 22(2), pp.1-72.
BOONE	BOONE	BOONE	10.21233/n36d82	Neotoma (last access: 1 April 2021)	296	302	Boone Lake	55.575	-119.433	872	North America	Lake	Raw	72	AWI	7	-25	13961	197	13986	Glacial montane lake. Physiography: glaciated mountain foothills. Surrounding vegetation: Picea mariana; Betula glandulosa, Salix.	1978-03-01 00:00:00	White, J.M. and Mathewes, R.W., 1986. Postglacial vegetation and climatic change in the upper Peace River district, Alberta. Canadian Journal of Botany, 64(10), pp.2305-2318.	https://doi.org/10.1139/b86-302	White, J.M., Mathewes, R.W. and Mathews, W.H., 1979. Radiocarbon dates from Boone Lake and their relation to the'Ice-free Corridor'in the Peace River District of Alberta, Canada. Canadian Journal of Earth Sciences, 16(9), pp.1870-1874.	https://doi.org/10.1139/e79-171	White, J.M., Mathewes, R.W. and Mathews, W.H., 1985. Late Pleistocene chronology and environment of the "Ice-Free Corridor" of northwestern Alberta. Quaternary Research, 24(2), pp.173-186.	https://doi.org/10.1016/0033-5894(85)90004-3
BORDER	BORDER	BORDER	10.21233/n32q4d	Neotoma (last access: 1 April 2021)	297	303	Border Beacon	55.3333	-63.2	470	North America	Lake	Raw	27	AWI	5	-67	7666	297.4	7733	Kettle lake. Physiography: glacial outwash plain. Surrounding vegetation: tundra with scattered white spruce.		Lamb, H.F., 1982. Late Quaternary vegetational history of the forest-tundra ecotone in North-Central Labrador. Doctoral dissertation. University of Cambridge, Cambridge, England.		Lamb, H.F., 1985. Palynological evidence for postglacial change in the position of tree limit in Labrador. Ecological Monographs, 55(2), pp.241-258.	https://doi.org/10.2307/1942559
BORIACKB	BORIACKB	BORIACKB	10.21233/n3bw2v	Neotoma (last access: 1 April 2021)	298	304	Boriack Bog	30.36	-97.1261	143	North America	Peat	Raw	55	AWI	4	-62	19764	367.1	19826	Small bog. Physiography: rolling topography. Surrounding vegetation: Ilex/Myrica/Quercus/Woodwardia/Osmunda.	1969-01-01 00:00:00	Bryant Jr, V.M., 1977. A 16,000 year pollen record of vegetational change in central Texas. Palynology, 1, pp.143-156.	https://doi.org/10.1080/01916122.1977.9989156	Valastro, S. and Davis, E.M., 1970. University of Texas at Austin radiocarbon dates VIII. Radiocarbon, 12(2), pp.617-639.	https://doi.org/10.1017/S0033822200008316
BOUC	BOUC	BOUC	10.21233/n33c7d	Neotoma (last access: 1 April 2021)	300	306	Lac Boucané	47.4578	-69.4528	500	North America	Lake	Raw	24	AWI	3	424	12539	526.7	12115	Rock basin. Physiography: undulated plateau with shallow till. Surrounding vegetation: Betulo luteae - Abietetum / Betulo lutea.	1978-01-01 00:00:00	Lortie, G. and Richard, P.J.H., 1986. Late-glacial diatom and pollen stratigraphy from Lake Boucane, southeastern Quebec, Canada. In: Proceedings of the 8th International Symposium on Living and Fossil Diatoms, Paris, August 27 - September 1, 1984 (pp. 687-697).
BOUNDAR	BOUNDAR	BOUNDAR	10.21233/n3jq3c	Neotoma (last access: 1 April 2021)	301	307	Boundary Lake	55.25	-67.4	525	North America	Lake	Raw	51	AWI	6	-68	13185	265.1	13253		1975-01-01 00:00:00	Stravers, L.K.S., 1981. Palynology and deglaciation history of the central Labrador-Ungava Peninsula. Master's thesis. University of Colorado, Boulder, Colorado, USA.
BOUNDARY	BOUNDARY	BOUNDARY	10.21233/n3f11s	Neotoma (last access: 1 April 2021)	302	308	Boundary Pond	45.56	-70.68	603	North America	Lake	Raw	56	AWI	6	-20	13037	237.4	13057			Mott, R.J., 1977. Late-Pleistocene and Holocene palynology in southeastern Quebec. Geographie physique et Quaternaire, 31(1-2), pp.139-149.	https://doi.org/10.7202/1000060ar
BRANDRET	BRANDRET	BRANDRET	10.21233/n39699	Neotoma (last access: 1 April 2021)	303	309	Brandreth Bog	43.9167	-74.6833	600	North America	Peat	Raw	59	AWI	4	135	12228	208.5	12093	Bog in kettle. Physiography: rolling topography, Adirondack Highlands. Surrounding vegetation: Picea/Betula/Abies/Acer/Tsuga/Pinus.	1978-09-01 00:00:00	Bender, M.M., Baerreis, D.A. and Bryson, R.A., 1980. University of Wisconsin radiocarbon dates XVII. Radiocarbon, 22(1), pp.115-129.	https://doi.org/10.1017/S0033822200004781	Bender, M.M., Baerreis, D.A., Bryson, R.A. and Steventon, R.L., 1981. University of Wisconsin radiocarbon dates XVIII. Radiocarbon, 23(1), pp.145-161.	https://doi.org/10.1017/S0033822200037504	Overpeck, J.T., 1985. A pollen study of a late Quaternary peat bog, south-central Adirondack Mountains, New York. Geological Society of America Bulletin, 96(1), pp.145-154.	https://doi.org/10.1130/0016-7606(1985)96<145:APSOAL>2.0.CO;2
BRI2	BRI2	BRI2	10.21233/n31q3q	Neotoma (last access: 1 April 2021)	304	311	Brisay 2	54.36	-70.35	595	North America	Lake	Raw	19	AWI	3	-65	6955	390	7020	Rock basin. Physiography: hilly to rolling morainic landscape. Surrounding vegetation: Cladino - Piceetum marianae.	1979-07-17 00:00:00	Richard, P.J.H., Larouche, A. and Bouchard, M., 1982. Age de la deglaciation finale et histoire postglaciaire de la vegetation dans la partie centrale du Nouveau-Quebec. Geographie physique et Quaternaire, 36(1-2), pp.63-90 (in French).	https://doi.org/10.7202/032470ar
BROPHY	BROPHY	BROPHY	10.21233/n39w3x	Neotoma (last access: 1 April 2021)	305	312	Brophy Ditch	43.22	-81.73	184	North America	Farmland	Raw	25	AWI	2	10	6501	270.5	6491			Morgan, A.V., McAndrews, J.H. and Ellis, C.J., 2000. Geological history and paleoenvironment. An Early Paleoindian Site near Parkhill Ontario, pp.9-30.
BROWNC12	BROWNC12	BROWNC12	10.21233/n36591	Neotoma (last access: 1 April 2021)	306	313	Brown Lake	45.7798	-89.4925	448	North America	Lake	Raw	11	Neotoma_Binford 1986	15	-32.1	112.8	14.5	144.8		1984-02-07 00:00:00	Charles, D.F. and Whitehead, D.R., 1984. Paleoecological Investigation of Recent Lake Acidification (PIRLA): December 1984 Status Report. RP 2174-10, Electric Power Research Institute, Palo Alto, CA.		Charles, D.F. and Whitehead, D.R., 1986. Paleoecological Investigation of Recent Lake Acidification (PIRLA): Methods and Project Description. EPRI EA-4906, Electric Power Research Institute, Palo Alto, CA.		Shane, L.C., 1987. Northern Great Lakes States pollen and charcoal data. PIRLA Unpublished Report Series 9, Indiana University, Bloomington, IN.		Kingston, J.C., Cook, R.B., Kreis, R.G., Camburn, K.E., Norton, S.A., Sweets, P.R., Binford, M.W., Mitchell, M.J., Schindler, S.C., Shane, L.C.K. and King, G.A., 1990. Paleoecological investigation of recent lake acidification in the northern Great Lakes states. Journal of Paleolimnology, 4(2), pp.153-201.	https://doi.org/10.1007/BF00226322
BROWNSBY	BROWNSBY	BROWNSBY	10.21233/n32c8g	Neotoma (last access: 1 April 2021)	307	314	Brown's Bay, Lake Minnetonka	44.9577	-93.5451	300	North America	Lake	Raw	15	Neotoma_NAPD 1	12	-32	584	44	616	Mesotrophic bay in Lake Minnetonka. Physiography: rolling stagnation moraine. Surrounding vegetation: residential/Acer/Quercus/Tilia.		Murchie, S.L., 1984. 210Pb dating and recent geologic history of two bays of Lake Minnetonka. Master's thesis. University of Minnesota, Minneapolis, Minnesota, USA.
BROWNSLK	BROWNSLK	BROWNSLK	10.21233/n3hq32	Neotoma (last access: 1 April 2021)	308	315	Brown Lake	40.6806	-82.0625	295	North America	Lake	Raw	15	AWI	2	10789	20872	720.2	10083	Kettle lake with marginal fen. Physiography: postglacial lake bottom. Surrounding vegetation: Decodon/Alnus/Salix/Acer/Prunus.	1975-01-01 00:00:00	Sanger, J.E. and Crowl, G.H., 1979. Fossil pigments as a guide to the paleolimnology of Browns Lake, Ohio. Quaternary Research, 11(3), pp.342-352.	https://doi.org/10.1016/0033-5894(79)90079-6	Shane, L.C., 1987. Late-glacial vegetational and climatic history of the Allegheny Plateau and the Till Plains of Ohio and Indiana, U.S.A. Boreas, 16(1), pp.1-20.	https://doi.org/10.1111/j.1502-3885.1987.tb00750.x	Shane, L.C. and Anderson, K.H., 1993. Intensity, gradients and reversals in late glacial environmental change in east-central North America. Quaternary Science Reviews, 12(5), pp.307-320.	https://doi.org/10.1016/0277-3791(93)90039-O
BROWNSPD	BROWNSPD	BROWNSPD	10.21233/n3d12v	Neotoma (last access: 1 April 2021)	309	316	Browns Pond	38.1547	-79.6164	620	North America	Lake	Raw	50	AWI	10	-36	20663	422.4	20699	Small sinkhole in limestone. Physiography: Ridge and Vally Province, Appalachians. Surrounding vegetation: Quercus alba, Q. rubra forest.	1989-01-01 00:00:00	Kneller, M. and Peteet, D., 1993. Late-Quaternary climate in the Ridge and Valley of Virginia, U.S.A.: Changes in vegetation and depositional environment: A contribution to the 'North Atlantic seaboard programme' of IGCP-253, 'Termination of the Pleistocene'. Quaternary Science Reviews, 12(8), pp.613-628.	https://doi.org/10.1016/0277-3791(93)90003-5
BRUVAT	BRUVAT	BRUVAT	10.21233/n3870x	Neotoma (last access: 1 April 2021)	310	317	Bruvatnet [Rovvejávri]	70.1811	28.4072	119	Europe	Lake	Raw	40	AWI	5	337	13310	332.6	12973	Lake. Physiography: Bedrock hills mantled by gl. drift (till. Surrounding vegetation: Thin mountain birch scrub.	1973-04-01 00:00:00	Hyvarinen, H., 1975. Absolute and relative pollen diagrams from northernmost Fennoscandia. Fennia-International Journal of Geography, 142(1), pp.1-23.
BUCKBEAN	BUCKBEAN	BUCKBEAN	10.21233/n34h6q	Neotoma (last access: 1 April 2021)	311	318	Buckbean Fen	44.2986	-110.261	2362	North America	Peat	Raw	59	AWI	5	-51	13895	240.4	13946	Fen 5 m above Yellowstone Lake. Physiography: within former Yellowstone Lake shorelines. Surrounding vegetation: Pinus contorta forest.		Baker, R.G., 1976. Late Quaternary vegetation history of the Yellowstone Lake basin, Wyoming. United States Geological Survey Professional Paper 729-E.
BUCYRUS	BUCYRUS	BUCYRUS	10.21233/n3902k	Neotoma (last access: 1 April 2021)	314	321	Bucyrus Bog	40.7972	-82.9333	318	North America	Peat	Raw	25	AWI	5	9778	18416	359.9	8638	Small cresent shaped wet area. Physiography: Till Plains. Surrounding vegetation: Salix/Populus/Crataegus.	1986-01-01 00:00:00	Sears, P.B., 1930. A record of post-glacial climate in northern Ohio. Ohio Journal of Science, 30(4), pp.205-217.		Shane, L.C., 1989. Changing palynological methods and their role in three successive interpretations of the late-glacial environments at Bucyrus Bog, Ohio, USA. Boreas, 18(4), pp.297-309.	https://doi.org/10.1111/j.1502-3885.1989.tb00404.x
BURDEN	BURDEN	BURDEN	10.21233/n31g7t	Neotoma (last access: 1 April 2021)	317	324	Burden Lake	42.6038	-73.5618	192	North America	Lake	Raw	34	AWI	11	80	9782	294	9702	Lake with two basins. Physiography: Hudson valley/Glac. Allegheny Plateau. Surrounding vegetation: Quercus/Carya/Acer.	1981-07-01 00:00:00	Gaudreau, D.C., 1986. Late-Quaternary vegetational history of the northeast: paleoecological implications of topographic patterns in pollen distributions. Doctoral dissertation. Yale University, New Haven, Connecticut, USA.
Byllatskoye	Byllatskoye	BYLLAT	10.21233/n3797z	Neotoma (last access: 1 April 2021)	320	327	Byllatskoye Exposure, Byllat River, Indigirka Basin	69.1653	140.062	316	Asia	Alluvial/Fluvial	Raw	6	AWI	3	2924	43921	8199.4	40997	Exposure in river channel. Physiography: river valley. Surrounding vegetation: open Larix forest.		Anderson, P.M. and Lozhkin, A.V., 2002. Late Quaternary Vegetation and Climate of Siberia and the Russian Far East (Palynological and Radiocarbon Database). North East Science Center, Far East Branch, Russian Academy of Sciences, Magadan, Russia.
CAHABA	CAHABA	CAHABA	10.21233/n33h51	Neotoma (last access: 1 April 2021)	321	328	Cahaba Pond	33.5	-86.5333	204	North America	Lake	Raw	61	AWI	11	-18	14133	235.8	14151		1979-10-01 00:00:00	Delcourt, H.R., Delcourt, P.A. and Spiker, E.C., 1983. A 12 000-Year Record of Forest History form Cahaba Pond, St. Clair County, Alabama. Ecology, 64(4), pp.874-887.	https://doi.org/10.2307/1937210
CAL	CAL	CAL	10.21233/n3cp57	Neotoma (last access: 1 April 2021)	322	329	Saint-Calixte	45.9611	-73.8681	261	North America	Lake	Raw	44	AWI	4	53	12041	278.8	11988	Rock basin lake. Physiography: till covered hilly bedrock. Surrounding vegetation: Tilio - Aceretum sacchari.	1977-03-09 00:00:00
CALACONT	CALACONT	CALACONT	10.21233/n3801w	Neotoma (last access: 1 April 2021)	323	330	Cala Conto	-17.5667	-65.9333	2700	South America	Alluvial/Fluvial	Raw	30	AWI	4	12506	42655	1039.6	30149	Interandean plain.		Graf, K., 1992. Pollendiagramme aus den Anden: Eine Synthese zur Klimageschichte und Vegetationsentwicklung seit der letzten Eiszeit. Physische Geographie 34. Universitat Zurich-Irchel, Geographisches Institut, Zurich, Switzerland (in German).		Graf, K., 1989. Palinologia del cuaternario reciente en los Andes del Ecuador, del Peru, y de Bolivia. Boletin Servicio Geologico Bolivia, 4, pp.69-91 (in Spanish).
CAMEL	CAMEL	CAMEL	10.21233/n3460b	Neotoma (last access: 1 April 2021)	324	331	Camel Lake	30.28	-84.99	20	North America	Lake	Raw	116	AWI	9	212	42449	367.3	42237	Sinkhole lake. Physiography: level, Gulf Coastal Plain. Surrounding vegetation: Pinus palustris/Quercus laevis forest.	1986-03-26 00:00:00	Watts, W.A., Hansen, B.C. and Grimm, E.C., 1992. Camel Lake: A 40 000-yr record of vegetational and forest history from northwest Florida. Ecology, 73(3), pp.1056-1066.	https://doi.org/10.2307/1940180	ACER project members; Sanchez Goñi, Maria Fernanda; Desprat, Stéphanie; Daniau, Anne-Laure; Watts, William A; Hansen, Barbara C S; Grimm, Eric C (2017): CLAM age model and pollen profile of sediment core Camel_Lake. PANGAEA	https://doi.org/10.1594/PANGAEA.872852	Sánchez Goñi, M.F., Desprat, S., Daniau, A.L., Bassinot, F.C., Polanco-Martínez, J.M., Harrison, S.P., Allen, J.R., Anderson, R.S., Behling, H., Bonnefille, R. and Burjachs, F., 2017. The ACER pollen and charcoal database: a global resource to document vegetation and fire response to abrupt climate changes during the last glacial period. Earth System Science Data, 9(2), pp.679-695.	https://doi.org/10.5194/essd-9-679-2017	Watts, W.A., Hansen, B.C. and Grimm, E.C., 1992. Camel Lake: A 40 000‐yr record of vegetational and forest history from northwest Florida. Ecology, 73(3), pp.1056-1066.	https://doi.org/10.2307/1940180
CAMP11LK	CAMP11LK	CAMP11LK	10.21233/n30g64	Neotoma (last access: 1 April 2021)	325	332	Camp 11 Lake	46.67	-88.02	549	North America	Lake	Raw	37	AWI	11	-51	11758	328	11809			Brubaker, L.B., 1975. Postglacial forest patterns associated with till and outwash in northcentral Upper Michigan. Quaternary Research, 5(4), pp.499-527.	https://doi.org/10.1016/0033-5894(75)90013-7
CAMP12LK	CAMP12LK	CAMP12LK	10.21233/n3ft4v	Neotoma (last access: 1 April 2021)	326	333	Camp 12 Lake	45.98	-89.37	505	North America	Lake	Raw	16	AWI	15	-23	157	12	180	Seepage lake. Physiography: gently rolling sandy terrain. Surrounding vegetation: Acer/Quercus/Betula/Pinus/Populus.	1984-02-10 00:00:00	Charles, D.F. and Whitehead, D.R., 1984. Paleoecological Investigation of Recent Lake Acidification (PIRLA): December 1984 Status Report. RP 2174-10, Electric Power Research Institute, Palo Alto, CA.		Charles, D.F. and Whitehead, D.R., 1986. Paleoecological Investigation of Recent Lake Acidification (PIRLA): Methods and Project Description. EPRI EA-4906, Electric Power Research Institute, Palo Alto, CA.		Shane, L.C., 1987. Northern Great Lakes States pollen and charcoal data. PIRLA Unpublished Report Series 9, Indiana University, Bloomington, IN.		Kingston, J.C., Cook, R.B., Kreis, R.G., Camburn, K.E., Norton, S.A., Sweets, P.R., Binford, M.W., Mitchell, M.J., Schindler, S.C., Shane, L.C.K. and King, G.A., 1990. Paleoecological investigation of recent lake acidification in the northern Great Lakes states. Journal of Paleolimnology, 4(2), pp.153-201.	https://doi.org/10.1007/BF00226322
CAMPING	CAMPING	CAMPING	10.21233/n36981	Neotoma (last access: 1 April 2021)	328	335	Chistoye Lake Exposure	59.55	151.833	91	Asia	Lake	Raw	12	AWI	6	187	7555	669.8	7368	Peat exposure along lake shore. Physiography: tectonic basin. Surrounding vegetation: Larix dahurica muskeg.	1994-07-01 00:00:00	Anderson, P.M. and Lozhkin, A.V., 2002. Late Quaternary Vegetation and Climate of Siberia and the Russian Far East (Palynological and Radiocarbon Database). North East Science Center, Far East Branch, Russian Academy of Sciences, Magadan, Russia.		Anderson, P.M., Belaya, B.V., Glushkova, O.Y. and Lozhkin, A.V., 1997. New data about the vegetation history of northern Priokhot'ye during the Late Pleistocene and Holocene. In: Late Pleistocene and Holocene of Beringia ed. by M.K. Gagiev (pp.33-54). North East Interdisciplinary Research Institute, Far East Branch, Russian Academy of Sciences, Magadan (in Russian).
CANDELAB	CANDELAB	CANDELAB	10.21233/n32h63	Neotoma (last access: 1 April 2021)	329	336	Candelabra Lake	45.9583	-73.8689	1040	North America	Lake	Raw	58	AWI	12	-28	11580	203.6	11608	Small lake. Surrounding vegetation: Picea mariana, muskeg.		Cwynar, L.C. and Spear, R., 1995. Paleovegetation and paleoclimatic changes in the Yukon at 6 ka BP. Geographie physique et Quaternaire, 49(1), pp.29-35.	https://doi.org/10.7202/033027ar
CAR_neotoma	CAR_neotoma	CAR	10.21233/n3bs4k	Neotoma (last access: 1 April 2021)	330	337	Tourbière Caribou	47.6397	-71.2358	790	North America	Lake	Raw	14	AWI	2	2319	7412	391.8	5093	Kettle lake with 90% quaking mat. Physiography: fluvioglacial undulating valley bottom. Surrounding vegetation: Piceeto marianae - Abietetum.	1969-06-29 00:00:00	Richard, P.J.H., 1977. Histoire post-wisconsinienne de la vegetation du Quebec meridional par l'analyse pollinique. Service de la recherche, Direction generale des forets, Ministere des Terres et Forets du Quebec (in French).
CARIB	CARIB	CARIB	10.21233/n33894	Neotoma (last access: 1 April 2021)	332	339	Lac Caribou	48.1978	-64.94	116	North America	Lake	Raw	36	AWI	6	13	12658	361.3	12645	Floating bog mat over kettle lake. Physiography: fluvio-lacustrine outwash plain. Surrounding vegetation: Betulo luteae - Abietetum.	1980-01-01 00:00:00	Jette, H. and Richard, P.J,H., 1992. Contribution a l'histoire postglaciaire de la vegetation en Gaspesie meridionale, Quebec. Geographie physique et Quaternaire, 46(3), pp.273-284 (in French).	https://doi.org/10.7202/032914ar
CARIBBOG	CARIBBOG	CARIBBOG	10.21233/n3jm53	Neotoma (last access: 1 April 2021)	333	340	Caribou Bog	44.9367	-68.7734	37	North America	Peat	Raw	16	AWI	7	59	10888	721.9	10829	Raised bog. Physiography: coastal lowlands. Surrounding vegetation: Sphagnum, Ericaeae, Picea.	1975-08-01 00:00:00	Gajewski, K., 1987. Environmental history of Caribou Bog, Penobscot Co., Maine. Naturaliste Canadien, 114, pp.133-140.		Gajewski, K., 1979. Environmental history of Caribou Bog, Penobscot Co., Maine. Master's thesis. University of Maine, Orono, Maine, USA.
CARIBOU_neotoma	CARIBOU_neotoma	CARIBOU	10.21233/n3dt35	Neotoma (last access: 1 April 2021)	334	341	Caribou Hill	55.6667	-63.25	475	North America	Lake	Raw	37	AWI	5	-65	6830	191.5	6895	Small bay in larger lake. Physiography: Kogaluk plateau. Surrounding vegetation: tundra/Picea.		Lamb, H.F., 1982. Late Quaternary vegetational history of the forest-tundra ecotone in North-Central Labrador. Doctoral dissertation. University of Cambridge, Cambridge, England.		Lamb, H.F., 1985. Palynological evidence for postglacial change in the position of tree limit in Labrador. Ecological Monographs, 55(2), pp.241-258.	https://doi.org/10.2307/1942559
CARNINO	CARNINO	CARNINO	10.21233/n39398	Neotoma (last access: 1 April 2021)	335	342	Selle di Carnino	44.15	7.69444	1905	Europe	Peat	Raw	69	AWI	7	337	17067	246	16730	Large peaty depression. Surrounding vegetation: Subalpine meadows.		de Beaulieu, J.L., 1977. Contribution pollenanalytique a l'histoire tardiglaciaire et Holocene de la vegetation des Alpes meridionales francaices. Doctoral dissertation. Universite d'Aix-Marseille, Marseille, France.
CARPLAKE	Carp_Lake	CARPLAKE	10.21233/n3597b	Neotoma (last access: 1 April 2021)	336	343	Carp Lake	45.9181	-120.881	714	North America	Lake	Raw	88	AWI	13	-51	35994	414.3	36045	Volcanic explosion crater. Physiography: hilly, local relief 100 m. Surrounding vegetation: open ponderosa pine forest.	1981-01-01 00:00:00	Barnosky, C.W., 1983. Late-Quaternary vegetational and climatic history of southwestern Washington. Doctoral dissertation. University of Washington, Seattle, Washingtion, USA.		Barnosky, C.W., 1985. Late Quaternary vegetation in the southwestern Columbia basin, Washington. Quaternary Research, 23(1), pp.109-122.	https://doi.org/10.1016/0033-5894(85)90075-4	ACER project members; Sanchez Goñi, Maria Fernanda; Desprat, Stéphanie; Daniau, Anne-Laure; Whitlock, Cathy L; Bartlein, Patrick J; Sarna-Wojcicki, Andrei M; Nickmann, Rudy J (2017): CLAM age model and pollen profile of sediment core Carp_Lake. PANGAEA	https://doi.org/10.1594/PANGAEA.872853	ACER project members; Sanchez Goñi, Maria Fernanda; Desprat, Stéphanie; Daniau, Anne-Laure; Allen, Judy R M; Anderson, R Scott; Behling, Hermann; Bonnefille, Raymonde; Cheddadi, Rachid; Combourieu-Nebout, Nathalie; Dupont, Lydie M; Fletcher, William J; González, Catalina; Grigg, Laurie D; Grimm, Eric C; Hayashi, Ryoma; Helmens, Karin F; Hessler, Ines; Heusser, Linda E; Hooghiemstra, Henry; Huntle…	https://doi.org/10.1594/PANGAEA.872783	Sánchez Goñi, M.F., Desprat, S., Daniau, A.L., Bassinot, F.C., Polanco-Martínez, J.M., Harrison, S.P., Allen, J.R., Anderson, R.S., Behling, H., Bonnefille, R. and Burjachs, F., 2017. The ACER pollen and charcoal database: a global resource to document vegetation and fire response to abrupt climate changes during the last glacial period. Earth System Science Data, 9(2), pp.679-695.	https://doi.org/10.5194/essd-9-679-2017	Whitlock, C. and Bartlein, P.J., 1997. Vegetation and climate change in northwest America during the past 125 kyr. Nature, 388(6637), pp.57-61.	https://doi.org/10.1038/40380	Whitlock, C., Sarna-Wojcicki, A.M., Bartlein, P.J. and Nickmann, R.J., 2000. Environmental history and tephrostratigraphy at Carp Lake, southwestern Columbia basin, Washington, USA. Palaeogeography, Palaeoclimatology, Palaeoecology, 155(1-2), pp.7-29.	https://doi.org/10.1016/S0031-0182(99)00092-9
CARTER	CARTER	CARTER	10.21233/n39s3w	Neotoma (last access: 1 April 2021)	337	345	Carter Site	40.21	-84.68	305	North America	Lake	Raw	44	AWI	6	13817	19559	133.5	5742	Circular kettle lake. Physiography: till plain; Union city and Bloomer moraine. Surrounding vegetation: agriculturally disturbed.	1972-02-01 00:00:00	Shane, L.C., 1976. Late-glacial and postglacial palynology and chronology of Darke County, west-central Ohio. Doctoral dissertation. Kent State University, Kent, Ohio, USA.		Shane, L.C., 1987. Late-glacial vegetational and climatic history of the Allegheny Plateau and the Till Plains of Ohio and Indiana, USA. Boreas, 16(1), pp.1-20.	https://doi.org/10.1111/j.1502-3885.1987.tb00750.x
CAS_neotoma	CAS_neotoma	CAS	10.21233/n3602n	Neotoma (last access: 1 April 2021)	338	346	Lac Castor	46.6139	-72.9986	220	North America	Lake	Raw	48	AWI	6	105	11304	238.3	11199	Rock basin lake. Physiography: hilly moraine. Surrounding vegetation: Tilio - Aceretum sacchari.	1975-09-03 00:00:00
CAUNAHU1	CAUNAHU1	CAUNAHU1	10.21233/n3ct3v	Neotoma (last access: 1 April 2021)	342	350	Caunahue	-40	-72	500	South America	Alluvial/Fluvial	Raw	58	AWI	9	3026	17810	259.4	14784	Outcrop along Caunahue river (L. Ranco). Physiography: within end-moraines. Surrounding vegetation: Valdivian rainforest.	1987-01-01 00:00:00	Markgraf, V., 1991. Younger Dryas in southern South America?. Boreas, 20(1), pp.63-69.	https://doi.org/10.1111/j.1502-3885.1991.tb00459.x
CAYAMBE	CAYAMBE	CAYAMBE	10.21233/n3840w	Neotoma (last access: 1 April 2021)	343	351	Cayambe	-0.03333	-78.0333	4350	South America	Peat	Raw	22	AWI	6	283	5909	267.9	5626			Graf, K., 1992. Pollendiagramme aus den Anden: Eine Synthese zur Klimageschichte und Vegetationsentwicklung seit der letzten Eiszeit. Physische Geographie 34. Universitat Zurich-Irchel, Geographisches Institut, Zurich, Switzerland (in German).		Graf, K., 1989. Palinologia del cuaternario reciente en los Andes del Ecuador, del Peru, y de Bolivia. Boletin Servicio Geologico Bolivia, 4, pp.69-91 (in Spanish).
CEDARBLK	CEDARBLK	CEDARBLK	10.21233/n3498d	Neotoma (last access: 1 April 2021)	344	352	Cedar Bog	45.41	-93.2	405	North America	Lake	Raw	44	AWI	3	-4	14640	340.6	14644	Lake surrounded by Larix bog. Physiography: Anoka Sand Plain. Surrounding vegetation: Quercus ellipsoidalis, Thuja, Larix.	1960-01-01 00:00:00	Cushing, E.J., 1967. Late-Wisconsin pollen stratigraphy and the glacial sequence in Minnesota. In: Quaternary paleoecology ed. by E.J. Cushing and H.E. Wright Jr (pp.59-88). Yale University Press, New Haven, Connecticut, USA.		Cushing, E.J., 1963. Late-Wisconsin pollen stratigraphy in east-central Minnesota. Doctoral dissertation. University of Minnesota, Minneapolis, Minnesota, USA.		Stuiver, M., Deevey, E.S. and Rouse, I., 1963. Yale natural radiocarbon measurements VIII. Radiocarbon, 5, pp.312-341.	https://doi.org/10.1017/S0033822200036936
CHABADA2	CHABADA2	CHABADA2	10.21233/n30m6h	Neotoma (last access: 1 April 2021)	346	354	Chabada Lake	61.9768	129.378	290	Asia	Lake	Raw	116	AWI	4	-27	13451	117.2	13478	Thermokarst lake. Physiography: Lena Plain. Surrounding vegetation: taiga.	1990-03-01 00:00:00	Tarasov, P.E., Harrison, S.P., Saarse, L., Pushenko, M.Y., Andreev, A.A., Aleshinskaya, Z.V., Davydova, N.N., Dorofeyuk, N.I., Efremov, Y.V., Khomutova, V.I., Sevastyanov, D.V., Tamosaitis, J., Uspenskaya, O.N., Yakushko, O.F. and Tarasova, I.V., 1994. Lake status records from the former Soviet Union and Mongolia: data base documentation. Paleoclimatology Publications Series 2, World Data Center-…		Andreev, A.A., Klimanov, V.A., Sulerzhitsky, L.D. and Khotinsky, N.A., 1989. Chronology of environmental changes in central Yakutia during the Holocene. In: Paleoklimaty golotsena i pozdnelednikov'ya [Paleoclimates of Holocene and late glacial) (pp.115-121). Nauka, Moscow, Russia (in Russian).
CHACALT1	CHACALT1	CHACALT1	10.21233/n38s3k	Neotoma (last access: 1 April 2021)	347	355	Chacaltaya 1	-16.3667	-68.15	4750	South America	Peat	Raw	45	AWI	5	23	8750	198.3	8727			Graf, K., 1992. Pollendiagramme aus den Anden: Eine Synthese zur Klimageschichte und Vegetationsentwicklung seit der letzten Eiszeit. Physische Geographie 34. Universitat Zurich-Irchel, Geographisches Institut, Zurich, Switzerland (in German).
CHACALT2	CHACALT2	CHACALT2	10.21233/n35310	Neotoma (last access: 1 April 2021)	348	356	Chacaltaya 2	-16.3667	-68.15	4350	South America	Peat	Raw	41	AWI	5	-50	12336	309.6	12386			Graf, K., 1992. Pollendiagramme aus den Anden: Eine Synthese zur Klimageschichte und Vegetationsentwicklung seit der letzten Eiszeit. Physische Geographie 34. Universitat Zurich-Irchel, Geographisches Institut, Zurich, Switzerland (in German).
CHALCOLA	CHALCOLA	CHALCOLA	10.21233/89x4-b040	Neotoma (last access: 1 April 2021)	349	357	Chalco Lake	19.5	-99	2240	North America	Lake	Raw	90	AWI	9	20	24046	270	24026	Playa, marsh, shallow lake. Physiography: basin surrounded by stratovolcanoes. Surrounding vegetation: cultives.	1989-08-01 00:00:00	Lozano-Garcia, M.S. and Ortega-Guerrero, B., 1994. Palynological and magnetic susceptibility records of Lake Chalco, central Mexico. Palaeogeography, Palaeoclimatology, Palaeoecology, 109(2-4), pp.177-191.	https://doi.org/10.1016/0031-0182(94)90175-9	Lozano-Garcia, M.S., Ortega-Guerrero, B., Caballero-Miranda, M. and Urrutia-Fucugauchi, J., 1993. Late Pleistocene and Holocene paleoenvironments of Chalco lake, central Mexico. Quaternary Research, 40(3), pp.332-342.	https://doi.org/10.1006/qres.1993.1086	Ortega-Guerrero, B., 1992. Paleomagnetismo, magnetoestratifia y paleoecologia del Cuaternario tardio en el Lago de Chalco, Cuenca de Mexico. Doctoral dissertation. National University of Mexico, Mexico City, Mexico.
CHASE_neotoma	CHASE_neotoma	CHASE	10.21233/n33d7r	Neotoma (last access: 1 April 2021)	353	361	Chase Pond	45.6514	-60.675	15	North America	Lake	Raw	39	AWI	7	10303	17295	184	6992	Small pond surrounded by steep banks. Physiography: broad rolling lowland, Appalachian Prov. Surrounding vegetation: Sphagnum, Picea mariana, P. glauca,Larix.		Levesque, A.J., Mayle, F.E., Walker, I.R. and Cwynar, L.C., 1993. A previously unrecognized late-glacial cold event in eastern North America. Nature, 361(6413), pp.623-626.	https://doi.org/10.1038/361623a0	Mayle, F.E., Levesque, A.J. and Cwynar, L.C., 1993. Accelerator-mass-spectrometer ages for the Younger Dryas event in Atlantic Canada. Quaternary Research, 39(3), pp.355-360.	https://doi.org/10.1006/qres.1993.1042	Mayle, F.E. and Cwynar, L.C., 1995. A review of multi-proxy data for the Younger Dryas in Atlantic Canada. Quaternary Science Reviews, 14(9), pp.813-821.	https://doi.org/10.1016/0277-3791(95)00063-1	Mayle, F.E. and Cwynar, L.C., 1995. Impact of the Younger Dryas cooling event upon lowland vegetation of Maritime Canada. Ecological Monographs, 65(2), pp.129-154.	https://doi.org/10.2307/2937135	Levesque, A.J., Mayle, F.E., Walker, I.R. and Cwynar, L.C., 1993. A previously unrecognized late-glacial cold event in eastern North America. Nature, 361(6413), pp.623-626.	https://doi.org/10.1038/361623a0
CHERNIH	CHERNIH	CHERNIH	10.21233/n37s4n	Neotoma (last access: 1 April 2021)	355	363	Chernikhovo	53.4167	26.4333	168	Europe	Peat	Raw	52	AWI	4	680	17179	323.5	16499	Bog. Physiography: Outwash plain. Surrounding vegetation: Pinus-Betula, Alnus.	1982-08-01 00:00:00	Zernitskaya, V.P., 1985. Development of vegetation in the western part of the Kopyl upland during the Late Glacial time and Holocene. In: Geographical aspects of rational nature use, Nauka i Taknika edition (pp.110-116). Minsk, Byelorussia (in Russian).		Matveev, A.V., Krutous, E.A. and Zernitskaya, V., 1993. Geochronology of the Holocene of the Belorussian Polessie. Radiocarbon, 35(3), pp.435-439.	https://doi.org/10.1017/S0033822200060458
CHERYAR	CHERYAR	CHERYAR	10.21233/n34309	Neotoma (last access: 1 April 2021)	356	364	Chernyii Yar Exposure 955	43.1833	134.433	4	Asia	Alluvial/Fluvial	Raw	35	AWI	5	536	13220	373.1	12684	Alluvium-lagoon terrace. Physiography: swampy area of lower river valley. Surrounding vegetation: Larix-Alnus-Betula forest and bogs.	1986-06-28 00:00:00	Anderson, P.M. and Lozhkin, A.V., 2002. Late Quaternary Vegetation and Climate of Siberia and the Russian Far East (Palynological and Radiocarbon Database). North East Science Center, Far East Branch, Russian Academy of Sciences, Magadan, Russia.		Golubeva, L.V. and Karaulova, L.P., 1983. The vegetation and stratigraphy of the Pleistocene and Holocene of the southern Far East. Nauka, Moscow (in Russian).		Korotky, A.M. and Karaulova, L.P., 1975. New data about the stratigraphy of Quaternary deposits of Primor'ye. In: Questions of geomorphology and Quaternary geology of the southern Far East ed. by A.M. Korotky and A.P. Kulakov (pp.79-110). Far Eastern Branch, USSR Academy of Sciences, Vladivostok (in Russian).		Korotkii, A.M., Karaulova, L.P. and Troitskaya, T.S., 1980. The Quaternary deposits of Primor'ye. Nauka, Novosibirsk (in Russian).		Pushkar, V.S., 1979. Biostratigraphy of sediments of the late Anthropogene of the southern Far East. Nauka, Moscow (in Russian).
CHESNOK	CHESNOK	CHESNOK	10.21233/n30896	Neotoma (last access: 1 April 2021)	357	365	Chesnok Peat, Irtysh River	60	66.5	42	Asia	Peat	Raw	34	AWI	7	229	10712	317.7	10483	Peat exposure in river bank. Physiography: river valley lowland. Surrounding vegetation: Pinus sylvestris-P. sibirica-Betula.		Anderson, P.M. and Lozhkin, A.V., 2002. Late Quaternary Vegetation and Climate of Siberia and the Russian Far East (Palynological and Radiocarbon Database). North East Science Center, Far East Branch, Russian Academy of Sciences, Magadan, Russia.		Bakhareva, V.A., 1985. The palynological characteristics of late Quaternary and Holocene deposits in the vicinity of Perschino village on the Irtysh River. In: The palynostratigraphy of the Mesozoic and Cenozoic of Siberia ed. by V.S. Volkova, and A.F. Khlonova (pp.115-120). Nauka, Novosibirsk (in Russian).		Volkov, I.A., Gurtovaya, E.E. and Firsov, L.V., 1973. The structure, age and history of Holocene peat near Gorno-Slinkino village on the Irtysh River. In: The Pleistocene of Siberia and neighboring regions ed. by V.N. Saks (pp.55-68). Nauka, Moscow (in Russian).		Volkova, V.S., 1966. The Quaternary deposits of the lower Irtysh River and their biostratigraphic characteristics. Nauka, Novosibirsk (in Russian).
CHIPPEWA	CHIPPEWA	CHIPPEWA	10.21233/n32d8t	Neotoma (last access: 1 April 2021)	360	369	Chippewa Bog	43.1239	-83.2411	270	North America	Peat	Raw	75	AWI	4	586	11625	149.2	11039		1977-06-01 00:00:00	Bailey, R.E. and Ahearn, P.J., 1981. A late- and postglacial pollen record from Chippewa Bog, Lapeer Co., MI: further examination of white pine and beech immigration into the central Great Lakes region. In: Geobotany II ed. by R.C. Romans (pp.53-74). Plenum Press, New York, New York, USA.
CHIVRES	CHIVRES	CHIVRES	10.21233/n3dq34	Neotoma (last access: 1 April 2021)	363	374	Le Marais St Boetien	49.6167	3.81667	73	Europe	Peat	Raw	30	AWI	6	761	12057	389.5	11296	Marsh. Physiogramphy: basin. Surrounding vegetation: Betula, Populus, Salix, Quercus.	1962-09-01 00:00:00	van Zeist, W. and van der Spoel-Walvius, M.R., 1980. A palynological study of the late-glacial and the postglacial in the Paris Basin. Palaeohistoria, 23, pp.67-109.
CHTSWRTH	CHTSWRTH	CHTSWRTH	10.21233/n38x16	Neotoma (last access: 1 April 2021)	364	375	Chatsworth Bog	40.6759	-88.3244	219	North America	Peat	Raw	64	AWI	8	643	17553	268.4	16910	Marl fen in outwash channel. Physiography: level ground moraine. Surrounding vegetation: corn and soybean fields.	1977-05-01 00:00:00	King, J.E., 1981. Late Quaternary vegetational history of Illinois. Ecological Monographs, 51(1), pp.43-62.	https://doi.org/10.2307/2937306
CIELBLAN	CIELBLAN	CIELBLAN	10.21233/n39k6z	Neotoma (last access: 1 April 2021)	370	381	Lac Ciel Blanc	59.5167	-122.167	651	North America	Lake	Raw	24	AWI	5	-27	13073	569.6	13100		1983-04-09 00:00:00	MacDonald, G.M. and Cwynar, L.C., 1985. A fossil pollen based reconstruction of the late Quaternary history of lodgepole pine (Pinus contorta ssp. latifolia) in the western interior of Canada. Canadian Journal of Forest Research, 15(6), pp.1039-1044.	https://doi.org/10.1139/x85-168	MacDonald, G.M. and Cwynar, L.C., 1991. Post-glacial population growth rates of Pinus contorta ssp. latifolia in western Canada. Journal of Ecology, 79(2), pp.417-429.	https://doi.org/10.2307/2260723
CLARENCE	CLARENCE	CLARENCE	10.21233/n32t4f	Neotoma (last access: 1 April 2021)	477	488	Isla Clarence	-54.2	-71.2333	10	South America	Peat	Raw	39	AWI	3	317	10807	276.1	10490	Surrounding vegetation: Nothofagus betuloides rain forest.		Markgraf, V., 1983. Late and postglacial vegetational and paleoclimatic changes in subantarctic, temperate, and arid environments in Argentina. Palynology, 7(1), pp.43-70.	https://doi.org/10.1080/01916122.1983.9989252
CLEARLIA	CLEARLIA	CLEARLIA	10.21233/n3c026	Neotoma (last access: 1 April 2021)	478	489	Clear Lake	43.1251	-93.4297	374	North America	Lake	Raw	53	AWI	11	-26	13743	264.8	13769	Surrounding vegetation: farmland.		Baker, R.G., Maher, L.J., Chumbley, C.A. and Van Zant, K.L., 1992. Patterns of Holocene environmental change in the midwestern United States. Quaternary Research, 37(3), pp.379-389.	https://doi.org/10.1016/0033-5894(92)90074-S
CLEARLK	CLEARLK	CLEARLK	10.21233/n3761n	Neotoma (last access: 1 April 2021)	479	490	Clear Lake	41.6385	-86.5446	244	North America	Lake	Raw	56	AWI	8	-23	15966	290.7	15989		1969-02-01 00:00:00	Bailey, R.E., 1972. Late- and postglacial environmental changes in northwestern Indiana. Doctoral dissertation. Indiana University, Bloomington, Indiana, USA.
CLEARPND	CLEARPND	CLEARPND	10.21233/n3jt55	Neotoma (last access: 1 April 2021)	480	492	Clear Pond	33.7989	-78.9534	10	North America	Lake	Raw	181	AWI	10	-39	25402	141.3	25441	Small sinkhole on relict barrier. Physiography: relict barrier island formation. Surrounding vegetation: long-leaf pine, turkey oak.	1992-05-13 00:00:00	Hussey, T.C., 1993. A 20,000-year history of vegetation and climate at Clear Pond, northeastern South Carolina. Master's thesis. University of Maine, Orono, Maine, USA.
CLEARWTR	CLEARWTR	CLEARWTR	10.21233/n3f125	Neotoma (last access: 1 April 2021)	481	493	Clearwater Lake	50.8736	-107.933	686	North America	Lake	Raw	34	AWI	2	-53	7350	224.3	7403	Closed depression, kettle lake. Physiography: Alberta high plains, moraine, kame. Surrounding vegetation: grassland lake bordered by Populus.		Mott, R.J., 1973. Palynological studies in central Saskatchewan: pollen stratigraphy from lake sediment sequences. Geological Survey of Canada, Ottawa, Ontario, Canada.		Ritchie, J.C., 1976. The late-Quaternary vegetational history of the western interior of Canada. Canadian Journal of Botany, 54(15), pp.1793-1818.	https://doi.org/10.1139/b76-194
COCALVAR	COCALVAR	COCALVAR	10.21233/n35h7d	Neotoma (last access: 1 April 2021)	483	495	Cerro Calvario	-16.25	-68.5	3950	South America	Peat	Raw	18	AWI	3	5259	8637	198.7	3378			Graf, K., 1992. Pollendiagramme aus den Anden: Eine Synthese zur Klimageschichte und Vegetationsentwicklung seit der letzten Eiszeit. Physische Geographie 34. Universitat Zurich-Irchel, Geographisches Institut, Zurich, Switzerland (in German).
COGHILL	COGHILL	COGHILL	10.21233/n31t44	Neotoma (last access: 1 April 2021)	484	496	Coghill Lake	53.91	-66.78	530	North America	Lake	Raw	25	AWI	5	-33	7265	304.1	7298	Fluvial origin, moderate relief. Physiography: Caniapiscau granitic massif. Surrounding vegetation: lichen woodland.	1981-07-01 00:00:00	King, G.A., 1986. Deglaciation and vegetation history of western Labrador and adjacent Quebec. Doctoral dissertation. University of Minnesota, Minneapolis, Minnesota, USA.
COLOMSH	COLOMSH	COLOMSH	10.21233/n3b02w	Neotoma (last access: 1 April 2021)	485	497	Colo Marsh	42.02	-93.27	329	North America	Peat	Raw	49	AWI	6	-69	16551	346.2	16620	Physiography: Bemis Moraine.	1985-03-01 00:00:00	Baker, R.G., Chumbley, C.A., Witinok, P.M. and Kim, H.K., 1990. Holocene vegetational changes in eastern Iowa. Journal of the Iowa Academy of Science, 97(4), pp.167-177.		Kim, H.K., 1986. Late-glacial and Holocene environment in central Iowa: a comparative study of pollen data from four sites. Doctoral dissertation. University of Iowa, Iowa City, Iowa, USA.
COMPASS	COMPASS	COMPASS	10.21233/n3ht33	Neotoma (last access: 1 April 2021)	489	501	Compass Pond	50.0342	-56.1964	236	North America	Lake	Raw	71	AWI	7	-15	15463	221.1	15478	Rock basin lake. Physiography: bedrock hills with till veneer. Surrounding vegetation: Picea mariana, Abies balsamea, Betula.	1984-06-22 00:00:00	Blake Jr, W., 1986. Geological Survey of Canada radiocarbon dates XXV. Geological Survey of Canada Paper, 85(7), pp.2-3.		Dyer, A.K., 1986. A palynological investigation of the Late Quaternary vegetational history of the Baie Verte Peninsula, Northcentral Newfoundland. Master's thesis. Memorial University of Newfoundland, St. Johns, Newfoundland, Canada.
COPLEY	COPLEY	COPLEY	10.21233/n34m74	Neotoma (last access: 1 April 2021)	494	506	Copley Lake	38.8721	-107.083	3250	North America	Lake	Raw	60	AWI	6	-30	16972	288.2	17002	Montane glacial lake (water 1 m deep). Physiography: flat knoll on mountain slope. Surrounding vegetation: Picea engelmannii - Abies lasiocarpa.		Fall, P.L., 1988. Vegetation dynamics in the southern Rocky Mountains: late Pleistocene and Holocene timberline fluctuations. Doctoral dissertation. University of Arizona, Tucson, Arizona, USA.		Fall, P.L., 1997. Timberline fluctuations and late Quaternary paleoclimates in the Southern Rocky Mountains, Colorado. Geological Society of America Bulletin, 109(10), pp.1306-1320.	https://doi.org/10.1130/0016-7606(1997)109<1306:TFALQP>2.3.CO;2
COPPER	COPPER	COPPER	10.21233/n30t3f	Neotoma (last access: 1 April 2021)	495	507	Coppermine Saddleback	67.8333	-115.317	43	North America	Lake	Raw	47	AWI	4	-68	4173	92.2	4241			Nichols, H., 1975. Palynological and paleoclimatic study of the late Quaternary displacements of the boreal forest-tundra ecotone in Keewatin and Mackenzie, N.W.T., Canada. Occasional Paper 15. Institute of Arctic and Alpine Research, University of Colorado, Boulder, Colorado, USA.
COTAPAMP	COTAPAMP	COTAPAMP	10.21233/n3589r	Neotoma (last access: 1 April 2021)	497	509	Cotapampa	-15.2167	-69.1	4450	South America	Peat	Raw	16	AWI	5	-50	11328	758.5	11378
COTJ	COTJ	COTJ	10.21233/n31k6g	Neotoma (last access: 1 April 2021)	498	510	Tourbière de Lanoraie COTEAU JAUNE	45.9608	-73.3419	18	North America	Peat	Raw	24	AWI	5	799	8437	332.1	7638	Ombrotrophic bog, ericaceous. Physiography: dissected deltaic plain. Surrounding vegetation: Tilio - Aceretum sacchari.	1978-01-01 00:00:00	Comtois, P., 1982. Histoire holocene du climat et de la vegetation a Lanoraie (Quebec). Canadian Journal of Earth Sciences, 19(10), pp.1938-1952 (in French).	https://doi.org/10.1139/e82-172
COTTONWD	COTTONWD	COTTONWD	10.21233/n3798b	Neotoma (last access: 1 April 2021)	500	513	Cottonwood Lake (Su)	44.8354	-99.9081	549	North America	Lake	Raw	67	AWI	10	-34	14221	216	14255	Lake in preglacial stream valley. Physiography: Missouri Coteau, gently rolling. Surrounding vegetation: wheatgrass prairie, small-grain fields.	1984-02-24 00:00:00	Barnosky, C.W., Grimm, E.C. and Wright Jr, H.E., 1987. Towards a postglacial history of the northern Great Plains: A review of the paleoecologic problems. Annals of the Carnegie Museum, 56, pp.259-273.
COTTPASS	COTTPASS	COTTPASS	10.21233/n33m6f	Neotoma (last access: 1 April 2021)	501	514	Cottonwood Pass Pond	38.8287	-106.411	3670	North America	Lake	Raw	33	AWI	3	-22	9442	295.8	9464	Alpine pond. Physiography: glaciated mountain pass. Surrounding vegetation: Salix, sedges and grasses.		Fall, P.L., 1988. Vegetation dynamics in the southern Rocky Mountains: late Pleistocene and Holocene timberline fluctuations. Doctoral dissertation. University of Arizona, Tucson, Arizona, USA.		Fall, P.L., 1997. Timberline fluctuations and late Quaternary paleoclimates in the Southern Rocky Mountains, Colorado. Geological Society of America Bulletin, 109(10), pp.1306-1320.	https://doi.org/10.1130/0016-7606(1997)109<1306:TFALQP>2.3.CO;2
CRANBER	CRANBER	CRANBER	10.21233/n38329	Neotoma (last access: 1 April 2021)	503	516	Cranberry Lake	44.1	-78.1	170	North America	Lake	Raw	107	AWI	7	-31	15605	147.5	15636
CRANELAK	CRANELAK	CRANELAK	10.21233/n3489f	Neotoma (last access: 1 April 2021)	504	517	Crane Lake	36.5299	-112.149	2590	North America	Lake	Raw	23	AWI	3	-29	13995	637.5	14024	Mature karst doline. Physiography: Kaibab Plateau. Surrounding vegetation: Pinus ponderosa, Pseudotsuga menziesii, with sparse Abies concolor. Picea engelmannii, P, pungens, and Populus tremuloides line the meadow edges.		Shafer, D.S., 1989. The timing of late Quaternary monsoon precipitation maxima in the southwest United States. Doctoral dissertation. University of Arizona, Tucson, Arizona, USA.
CRANGLDS	CRANGLDS	CRANGLDS	10.21233/n30k7j	Neotoma (last access: 1 April 2021)	505	518	Cranberry Glades	38.2	-80.2833	1029	North America	Peat	Raw	43	AWI	4	24	18709	444.9	18685			Watts, W.A., 1979. Late Quaternary vegetation of central Appalachia and the New Jersey coastal plain. Ecological Monographs, 49(4), pp.427-469.	https://doi.org/10.2307/1942471
CRATES	CRATES	CRATES	10.21233/n3fx3h	Neotoma (last access: 1 April 2021)	506	519	Crates Lake	49.19	-81.26	259	North America	Lake	Raw	63	AWI	5	-37	12503	202.3	12540
CRIDERS	CRIDERS	CRIDERS	10.21233/n3bs5z	Neotoma (last access: 1 April 2021)	510	523	Crider's Pond	39.9667	-77.55	290	North America	Lake	Raw	56	AWI	3	-60	19152	349.3	19212			Watts, W.A., 1979. Late Quaternary vegetation of central Appalachia and the New Jersey coastal plain. Ecological Monographs, 49(4), pp.427-469.	https://doi.org/10.2307/1942471
CRISTAL	CRISTAL	CRISTAL	10.21233/ecm1-wf91	Neotoma (last access: 1 April 2021)	511	524	Cristal Lake	52.1167	-90.0833	355	North America	Lake	Raw	16	AWI	5	379	7840	497.4	7461	Physiography: Agutua moraine. Surrounding vegetation: black spruce.		Steventon, R.L. and Kutzbach, J.E., 1983. University of Wisconsin radiocarbon dates XX. Radiocarbon, 25(1), pp.152-168.	https://doi.org/10.1017/S0033822200005348	Bjorck, S., 1985. Deglaciation chronology and revegetation in northwestern Ontario. Canadian Journal of Earth Sciences, 22(6), pp.850-871.	https://doi.org/10.1139/e85-090
CROWFOOT	CROWFOOT	CROWFOOT	10.21233/n33902	Neotoma (last access: 1 April 2021)	512	525	Crowfoot Lake	51.65	-116.42	1940	North America	Lake	Raw	47	AWI	13	-60	13565	296.2	13625	Lake in glacial valley. Physiography: Mountains, outside Crowfoot Moraine. Surrounding vegetation: Picea engelmanii, Abies lasiocarpa.		Osborn, G., Clapperton, C., Davis, P.T., Reasoner, M., Rodbell, D.T., Seltzer, G.O. and Zielinski, G., 1995. Potential glacial evidence for the Younger Dryas event in the cordillera of North and South America. Quaternary Science Reviews, 14(9), pp.823-832.	https://doi.org/10.1016/0277-3791(95)00064-X	Reasoner, M.A., 1996. Late Quaternary alpine and sub-alpine lacustrine records: Canadian and Colorado Rocky Mountains. Doctoral dissertation. University of Alberta, Edmonton, Alberta, Canada.		Reasoner, M.A., Osborn, G. and Rutter, N.W., 1994. Age of the Crowfoot advance in the Canadian Rocky Mountains: A glacial event coeval with the Younger Dryas oscillation. Geology, 22(5), pp.439-442.	https://doi.org/10.1130/0091-7613(1994)022<0439:AOTCAI>2.3.CO;2
CROWSNES	CROWSNES	CROWSNES	10.21233/n3dx36	Neotoma (last access: 1 April 2021)	513	527	Crowsnest Lake	68.33	-146.46	881	North America	Lake	Raw	67	AWI	4	69	12594	189.8	12525	Morainally dammed lake. Physiography: high mountain valley. Surrounding vegetation: birch shrub tundra.	1982-07-01 00:00:00
CS-4	CS-4	CS-4	10.21233/n39406	Neotoma (last access: 1 April 2021)	516	530	Voros-mocsar	46.4772	19.1908	91	Europe	Peat	Raw	4	AWI	5	13135	13961	275.3	826	Marsh formed in a dead channel of Danube. Surrounding vegetation: Cultivated plain with meadows,pasture.
CTAR	CTAR	CTAR	10.21233/n35d8r	Neotoma (last access: 1 April 2021)	517	531	Starniki	50.2667	26.0167	198	Europe	Peat	Raw	30	AWI	10	413.5	13584	454.2	13170.5	Fen bog. Physiography: depression. Surrounding vegetation: Forests.	1978-08-01 00:00:00	Bezusko, L.G., Kajutkina, T.M. and Kovalyukh, N.N., 1982. YIII s'ezd Ukrainskovo botanicheskogo obschestva [New data of Allerod vegetation of Ukraine]. In: Naukova dumka edition (p.399). Kiev, Ukraine (in Russian).		Bezusko, L.G., Klimanov, V.A. and Sheliag-Sosonko, Y.R., 1988. Climatic conditions in Ukraine in the Late Post-glacial and Holocene. In: Paleoklimaty golotsena Evropeiyskoy territorii SSSR edition (pp.125-135). Moscow, Russia.		Khotinskiy, N.A., Bezusko, L.G. and Cherkinsky, A.E., 1994. Changes in vegetation in central and western regions of the Russian Plain. In: Paleogeographical basis of the modern landscapes, Nauka edition (pp.111-118). Moscow, Russia (in Russian).		Bezusko, L.G. and Klimanov, V.A., 1987. Climate and vegetation of the plain part of the Ukrainian SSR West in the Late Postglacial period. Ukrain'skyi Botanichnyi Zhurnal, 43, pp.54-58.		Bezusko, L.G., Kajutkina, T.M., Kovalukh, N.N. and Artjushenko, A.T., 1985. Paleobotanical and radiological studies of deposits from bog Starniki (Maloe Polessie). Ukrain'skyi Botanichnyi Zhurnal, 42, pp.27-30.		Klimanov, V.A. and Bezusko, L.G., 1981. Climate and vegetation of small Polessie in Holocene. Ukrain'skyi Botanichnyi Zhurnal, 38, pp.24-26.		Sheliag-Sosonko, Y.R. and Bezusko, L.G., 1987. The oak- forests of Maloye Polessie in the Late Post-Glacial period. Ukrain'skyi Botanichnyi Zhurnal, 71, pp.4-8.
CUB2	CUB2	CUB2	10.21233/n31q43	Neotoma (last access: 1 April 2021)	518	532	Cub Lake	44.72	-84.95	360	North America	Lake	Raw	61	AWI	5	38	9550	158.5	9512			Rasmussen, J.B., 1982. Pollen stratigraphy and vegetational history of Cub Lake, Kalkaska County, Michigan. Master's thesis. Central Michigan University, Mount Pleasant, Michigan, USA.
CUBID	CUBID	CUBID	10.21233/n36319	Neotoma (last access: 1 April 2021)	520	534	Cub Lake	44.125	-111.183	1840	North America	Lake	Raw	26	AWI	2	-63	17402	698.6	17465	Shallow lake. Physiography: west slope Yellowstone Plateau. Surrounding vegetation: lodgepole pine, Douglas fir.	1969-01-01 00:00:00	Baker, R.G., 1983. Holocene vegetational history of the western United States. In: Late-Quaternary environments of the United States. Volume 2. the Holocene ed. by Wright Jr, H.E. (pp.109-127). University of Minnesota Press. Minneapolis, USA.		Bender, M.M., Bryson, R.A. and Baerreis, D.A., 1971. University of Wisconsin radiocarbon dates IX. Radiocarbon, 13(2), pp.475-486.	https://doi.org/10.1017/S0033822200008584
CUEVAHAI	CUEVAHAI	CUEVAHAI	10.21233/n32c9v	Neotoma (last access: 1 April 2021)	521	535	Cueva Haichol	-38.5833	-70.6667	1050	South America	Valley	Raw	9	AWI	2	192	7598.5	925.8	7406.5	Rockshelter. Physiography: about 50m above valley. Surrounding vegetation: scrub steppe with Maytenus and Schinus.	1979-01-01 00:00:00	Markgraf, V., 1988. Analisis palinologicos de los sedimentos. In: Arqueologia de la Cueva Haichol ed. by J.C. Fernandez (pp.97-102). Anales de Arqueologia y Etnologia (in Spanish).
CUEVAMIL	CUEVAMIL	CUEVAMIL	10.21233/n3hq4f	Neotoma (last access: 1 April 2021)	522	536	Cueva Milodon	-51.5833	-72.6333	50	South America	Cave	Raw	9	AWI	9	12567	15536	371.1	2969	Cave N Puerto Natales, Ultima Esperanza. Physiography: large cave in conglomerate facing west. Surrounding vegetation: Nothofagus pumilio woodland.	1973-01-01 00:00:00	Markgraf, V., 1985. Late Pleistocene faunal extinctions in southern Patagonia. Science, 228(4703), pp.1110-1112.	https://doi.org/10.1126/science.228.4703.1110	Salmi, M., 1955. Additional information on the findings in the Mylodon cave at Ultima Esperanza. Acta Geografica, 14, pp.314-333.
CUMBREUN	CUMBREUN	CUMBREUN	10.21233/n3cx14	Neotoma (last access: 1 April 2021)	523	537	Cumbre Unduavi	-16.35	-68.0417	4620	South America	Peat	Raw	38	AWI	5	-18	13934	377.1	13952			Graf, K., 1992. Pollendiagramme aus den Anden: Eine Synthese zur Klimageschichte und Vegetationsentwicklung seit der letzten Eiszeit. Physische Geographie 34. Universitat Zurich-Irchel, Geographisches Institut, Zurich, Switzerland (in German).
CUMMINSA	CUMMINSA	CUMMINSA	10.21233/n38719	Neotoma (last access: 1 April 2021)	524	538	Cummins Pond	48.4075	-89.3467	229	North America	Lake	Raw	38	AWI	6	4469	10094	152	5625	Pond. Physiography: Lake Superior Basin.		Julig, P.J., 1984. Cummins Paleo-indian Site and its paleoenvironment, Thunder Bay, Canada. Archaeology of Eastern North America, 12, pp.192-209.		Julig, P.J., McAndrews, J.H. and Mahaney, W.C., 1990. Geoarchaeology of the Cummins site on the beach of proglacial Lake Minong, Lake Superior Basin, Canada. In: Archaeological Geology of North America ed. by N.P. Lasca and J. Donahue (pp.21-50). Geological Society of America, Boulder, Colorado, USA.
CUPOLA	CUPOLA	CUPOLA	10.21233/n34d72	Neotoma (last access: 1 April 2021)	525	539	Cupola Pond	36.7991	-91.09	243	North America	Lake	Raw	52	AWI	8	-64	21914	430.9	21978	Small sinkhole pond almost completely occupied by Nyssa aquatica. Water is darkly stained with tannins. Upland vegetation: oak-hickory-pine forest with Quercus alba, Q. falcata, Q. palustris, Q. bicolor, Q. macrocarpa, Carya cordiformis, Acer saccharum, A. rubrum, Fraxinus pennsylvanica, F. tomentosa, Ostrya virginiana, and Pinus echinata.	1983-06-22 00:00:00	Delcourt, H.R. and Delcourt, P.A., 1994. Postglacial Rise and Decline of Ostrya virginiana (Mill.) K. Koch and Carpinus caroliniana Walt. In Eastern North America: Predictable Responses of Forest Species to Cyclic Changes in Seasonality of Climates. Journal of Biogeography, 21(2), pp.137-150.	https://doi.org/10.2307/2845468	Smith Jr, E.N., 1984. Late Quaternary Vegetational History at Cupola Pond, Ozark National Scenic Riverways, Southeastern Missouri. Master's thesis. University of Tennessee, Knoxville, Tennessee, USA.
CURUCAA	CURUCAA	CURUCAA	10.21233/n30q55	Neotoma (last access: 1 April 2021)	526	540	Lagoa da Curuça	-0.76553	-47.8559	35	South America	Lake	Raw	18	AWI	3	10897	13672	163.2	2775	Lake. Physiography: isolated lake, 15 km from the Atlantic. Surrounding vegetation: Amazon rain forest.	1994-06-01 00:00:00	Behling, H., 1996. First report on new evidence for the occurrence of Podocarpus and possible human presence at the mouth of the Amazon during the Late-glacial. Vegetation History and Archaeobotany, 5(3), pp.241-246.	https://doi.org/10.1007/BF00217501
CYGNET	CYGNET	CYGNET	10.21233/n3532c	Neotoma (last access: 1 April 2021)	528	543	Cygnet Lake Fen	44.65	-110.6	2530	North America	Peat	Raw	32	AWI	8	-57	18016	583	18073	Fen marginal to glacial scour lake. Physiography: Yellowstone Plateau. Surrounding vegetation: Pinus contorta forest.		Whitlock, C., 1993. Postglacial vegetation and climate of Grand Teton and southern Yellowstone National Parks. Ecological Monographs, 63(2), pp.173-198.	https://doi.org/10.2307/2937179	Whitlock, C. and Bartlein, P.J., 1993. Spatial variations of Holocene climatic change in the Yellowstone region. Quaternary Research, 39(2), pp.231-238.	https://doi.org/10.1006/qres.1993.1026
DASPATAS	DASPATAS	DASPATAS	10.21233/n37710	Neotoma (last access: 1 April 2021)	532	547	Lagoa das Patas	0.266667	-66.6833	300	South America	Lake	Raw	49	AWI	12	-51	53873	1123.4	53924	Lake, 300m x 7m on low inselberg. Physiography: small closed basin with flat bottom. Surrounding vegetation: dense, lowland tropical rain forest.		Colinvaux, P.A., de Oliveira, P.E., Moreno, J.E., Miller, M.C. and Bush, M.B., 1996. A long pollen record from lowland Amazonia: forest and cooling in glacial times. Science, 274(5284), pp.85-88.	https://doi.org/10.1126/science.274.5284.85
DAU	DAU	DAU	10.21233/n3cp6m	Neotoma (last access: 1 April 2021)	533	549	Daumont	54.8833	-69.4	607	North America	Lake	Raw	24	AWI	5	561	7340	294.7	6779	Rock basin lake. Physiography: rolling stagnation moraine. Surrounding vegetation: Cladino - Piceetum marianae.	1979-07-19 00:00:00	Richard, P.J.H., Larouche, A. and Bouchard, M., 1982. Age de la deglaciation finale et histoire postglaciaire de la vegetation dans la partie centrale du Nouveau-Quebec. Geographie physique et Quaternaire, 36(1-2), pp.63-90 (in French).	https://doi.org/10.7202/032470ar
DAVIS_neotoma	DAVIS_neotoma	DAVIS	10.21233/n37w39	Neotoma (last access: 1 April 2021)	534	550	Davis Lake	46.5917	-122.25	282	North America	Lake	Raw	75	AWI	17	37	29406	396.9	29369	Lake. Physiography: Puget Sound lowland. Surrounding vegetation: Psuedotsuga with Tsuga and Thuja.	1978-01-01 00:00:00	Barnosky, C.W., 1981. A record of late Quaternary vegetation from Davis Lake, southern Puget Lowland, Washington. Quaternary Research, 16(2), pp.221-239.	https://doi.org/10.1016/0033-5894(81)90046-6
DECOY	DECOY	DECOY	10.21233/n32x33	Neotoma (last access: 1 April 2021)	656	672	Decoy Lake	43.2413	-80.3674	260	North America	Lake	Raw	95	AWI	5	125	13620	143.6	13495	Kettle lake. Physiography: outwash plain. Surrounding vegetation: maize fields, oak woods.	1987-01-01 00:00:00	Szeicz, J.M. and MacDonald, G.M., 1991. Postglacial vegetation history of oak savanna in southern Ontario. Canadian Journal of Botany, 69(7), pp.1507-1519.	https://doi.org/10.1139/b91-195
DEER	DEER	DEER	10.21233/n3c33m	Neotoma (last access: 1 April 2021)	657	673	Deer Lake Bog	44.0333	-71.8333	1325	North America	Peat	Raw	32	AWI	6	-54	15717	508.7	15771	Physiography: on Mount Moosilauke.	1978-01-01 00:00:00	Spear, R.W., 1981. The history of high-elevation vegetation in the White Mountains of New Hampshire. Doctoral dissertation. University of Minnesota, Minneapolis, Minnesota, USA.
DEL1	DEL1	DEL1	10.21233/n33k8v	Neotoma (last access: 1 April 2021)	658	675	Delorme 1	54.41	-69.92	513	North America	Lake	Raw	20	AWI	4	288	6532	328.6	6244	Rock basin lake. Physiography: Rolling morainic landscape, shallow till. Surrounding vegetation: Cladino - Piceetum marianae.	1979-07-16 00:00:00	Richard, P.J.H., Larouche, A. and Bouchard, M., 1982. Age de la deglaciation finale et histoire postglaciaire de la vegetation dans la partie centrale du Nouveau-Quebec. Geographie physique et Quaternaire, 36(1-2), pp.63-90 (in French).	https://doi.org/10.7202/032470ar
DEL2	DEL2	DEL2	10.21233/n3f40f	Neotoma (last access: 1 April 2021)	659	677	Delorme 2	54.4236	-69.9297	538	North America	Lake	Raw	52	AWI	5	407	7339	135.9	6932	Rock basin lake. Physiography: hilly moraine. Surrounding vegetation: Cladino - Piceetum marianae.	1979-07-18 00:00:00	Richard, P.J.H., Larouche, A. and Bouchard, M., 1982. Age de la deglaciation finale et histoire postglaciaire de la vegetation dans la partie centrale du Nouveau-Quebec. Geographie physique et Quaternaire, 36(1-2), pp.63-90 (in French).	https://doi.org/10.7202/032470ar
DEMAIN	DEMAIN	DEMAIN	10.21233/n39d80	Neotoma (last access: 1 April 2021)	660	678	Lac Demain	62.05	-118.7	745	North America	Lake	Raw	23	AWI	5	-33	14073	641.2	14106	Depression in ground moraine. Physiography: ground moraine. Surrounding vegetation: Picea mariana-Sphagnum muskeg.	1982-04-17 00:00:00	MacDonald, G.M., 1984. Postglacial plant migration and vegetation development in the western Canadian boreal forest. Doctoral dissertation. University of Toronto, Toronto, Ontario, Canada.		MacDonald, G.M., 1987. Postglacial vegetation history of the Mackenzie River Basin. Quaternary Research, 28(2), pp.245-262.	https://doi.org/10.1016/0033-5894(87)90063-9
DEMONTLK	DEMONTLK	DEMONTLK	10.21233/n35m5p	Neotoma (last access: 1 April 2021)	661	679	Demont Lake	43.48	-85	248	North America	Lake	Raw	74	AWI	5	10	13983	191.4	13973
DENTONC1	DENTONC1	DENTONC1	10.21233/n3b31j	Neotoma (last access: 1 April 2021)	663	681	Denton Lake	45.854	-89.313	500	North America	Lake	Raw	17	Neotoma_Wang et al.	13	-33	151	11.5	184	Seepage lake.	1884-02-09 00:00:00	Charles, D.F. and Whitehead, D.R., 1984. Paleoecological Investigation of Recent Lake Acidification (PIRLA): December 1984 Status Report. RP 2174-10, Electric Power Research Institute, Palo Alto, CA.		Charles, D.F. and Whitehead, D.R., 1986. Paleoecological Investigation of Recent Lake Acidification (PIRLA): Methods and Project Description. EPRI EA-4906, Electric Power Research Institute, Palo Alto, CA.		Shane, L.C., 1987. Northern Great Lakes States pollen and charcoal data. PIRLA Unpublished Report Series 9, Indiana University, Bloomington, IN.		Kingston, J.C., Cook, R.B., Kreis, R.G., Camburn, K.E., Norton, S.A., Sweets, P.R., Binford, M.W., Mitchell, M.J., Schindler, S.C., Shane, L.C.K. and King, G.A., 1990. Paleoecological investigation of recent lake acidification in the northern Great Lakes states. Journal of Paleolimnology, 4(2), pp.153-201.	https://doi.org/10.1007/BF00226322
DERPUT	DERPUT	DERPUT	10.21233/n36c93	Neotoma (last access: 1 April 2021)	664	682	Derput	57.0333	124.117	700	Asia	Peat	Raw	52	AWI	5	443	12871	243.7	12428	Section of ancient peat (hill now). Physiography: neotectonic fall by the Yakokit river. Surrounding vegetation: open larch forest, shrub birch, Sphagnum.	1986-03-01 00:00:00	Andreev, A.A. and Klimanov, V.A., 1991. Izmeneniya rastitel'nost i klimatamezhdurech'ya rek Ungra i Yakokit (Yuzhnaya Yakutia) v golotsene [Vegetation history and climate changes in the interfluve of the rivers Ungra and Yakokit (Southern Yakutia) during the Holocene]. Botanichesky Zhurnal, 76(3), pp.334-351.
DEVILSWI	DEVILSWI	DEVILSWI	10.21233/n3hx4h	Neotoma (last access: 1 April 2021)	666	684	Devils Lake	43.4178	-89.7321	294	North America	Lake	Raw	122	AWI	17	-49	14971	124.1	15020	Lake is located in a pre-glacial gorge of the Wisconsin river cut through the Baraboo Hills, a bedrock high. The valley is dammed at both ends by terminal moraines deposited by the Green Bay lobe, which flowed around the Baraboo Hills. Lake is fed by groundwater. Surrounding vegetation: white-black-bur oak.	1978-02-01 00:00:00	Maher Jr, L.J., 1982. The palynology of Devils Lake, Sauk County, Wisconsin. In: Quaternary History of the Driftless Area ed. by J.C. Knox, L. Clayton, and D.M. Mickelson (pp.119-135). Field Trip Guide Book 5. University of Wisconsin-Extension, Geological and Natural History Survey, Madison, Wisconsin, USA.
DIA375	DIA375	DIA375	10.21233/n30x3g	Neotoma (last access: 1 April 2021)	669	688	Diana 375	60.99	-69.95	114	North America	Lake	Raw	23	AWI	3	16	8105	367.7	8089	Elongated rock basin. Physiography: hilly bedrock. Surrounding vegetation: Tundra.	1976-07-25 00:00:00	Richard, P.J.H., 1981. Paleophytogeographie postglaciaire en Ungava par l'analyse pollinique. Collection Paleo-Quebec, 13, p.154 (in French).
DIAB	DIAB	DIAB	10.21233/n31k7v	Neotoma (last access: 1 April 2021)	671	691	Lac du Diable	48.9108	-66.125	494	North America	Lake	Raw	35	AWI	6	-63	15033	444	15096	Large, relatively shallow rock basin. Physiography: perched fluvioglacial valley. Surrounding vegetation: Piceeto marianae - Abietetum.	1981-03-27 00:00:00	Richard, P.J.H. and Labelle, C., 1989. Histoire postglaciaire de la vegetation au lac du Diable, mont Albert, Gaspesie, Quebec. Geographie physique et Quaternaire, 43(3), pp.337-354 (in French).	https://doi.org/10.7202/032787ar
DINKEY	DINKEY	DINKEY	10.21233/n3c70v	Neotoma (last access: 1 April 2021)	673	693	Dinkey Meadow	37	-119.083	1683	North America	Meadow	Raw	15	AWI	3	-43	5661	407.4	5704	Small clearing along Dinkey Creek. Physiography: Sierra Nevada Mountain Range. Surrounding vegetation: Lodgepole Pine, White Fir, Sugar Pine.	1985-09-01 00:00:00	Anderson, R.S., 1987. Late-Quaternary environments of the Sierra Nevada, California. Doctoral dissertation. University of Arizona, Tucson, Arizona, USA.		Davis, O.K. and Moratto, M.J., 1988. Evidence for a warm dry early Holocene in the western Sierra Nevada of California: Pollen and plant macrofossil analysis of Dinkey and Exchequer Meadows. Madrono, 35(2), pp.132-149.
DISMAL	DISMAL	GDS91	10.21233/n37d70	Neotoma (last access: 1 April 2021)	679	699	Dismal Swamp (91)	36.5833	-76.45	6	North America	Peat	Raw	26	AWI	2	-15	11300	452.6	11315		1962-01-01 00:00:00	Whitehead, D.R., 1972. Developmental and environmental history of the Dismal Swamp. Ecological Monographs, 42(3), pp.301-315.	https://doi.org/10.2307/1942212
DIVIDE	DIVIDE	DIVIDE	10.21233/n3cw3j	Neotoma (last access: 1 April 2021)	681	701	Divide Lake	43.95	-110.23	2628	North America	Lake	Raw	23	AWI	4	-49	14591	665.5	14640	Glacial scour lake. Physiography: Pinyon Peak Highlands. Surrounding vegetation: Picea-Abies-Pinus albicaulis forest.	1985-08-01 00:00:00	Steventon, R.L. and Kutzbach, J.E., 1987. University of Wisconsin radiocarbon dates XXIV. Radiocarbon, 29(3), pp.397-415.	https://doi.org/10.1017/S0033822200043794	Steventon, R.L. and Kutzbach, J.E., 1988. University of Wisconsin radiocarbon dates XXV. Radiocarbon, 30(3), pp.367-383.	https://doi.org/10.1017/S0033822200044416	Whitlock, C., 1993. Postglacial vegetation and climate of Grand Teton and southern Yellowstone National Parks. Ecological Monographs, 63(2), pp.173-198.	https://doi.org/10.2307/2937179	Whitlock, C. and Bartlein, P.J., 1993. Spatial variations of Holocene climatic change in the Yellowstone region. Quaternary Research, 39(2), pp.231-238.	https://doi.org/10.1006/qres.1993.1026
Dlinnoye_Lake	Dlinnoye_Lake	DLINNOYE	10.21233/n35h8s	Neotoma (last access: 1 April 2021)	695	715	Dlinnoye Lake	67.7567	-178.842	280	Asia	Lake	Raw	11	AWI	2	-38	1336	137.4	1374	Morainally dammed lake. Physiography: glacio-fluvial features in uplands. Surrounding vegetation: graminoid-Salix-Ericales tundra.	1994-08-01 00:00:00	Anderson, P.M. and Lozhkin, A.V., 2002. Late Quaternary Vegetation and Climate of Siberia and the Russian Far East (Palynological and Radiocarbon Database). North East Science Center, Far East Branch, Russian Academy of Sciences, Magadan, Russia.
DOME	DOME	DOME	10.21233/n3660z	Neotoma (last access: 1 April 2021)	699	719	Dome Creek Meadow	40.0242	-107.051	3165	North America	Peat	Raw	29	AWI	4	65	12690	450.9	12625	Sedge meadow. Physiography: Colorado Front Range. Surrounding vegetation: Spruce/Betula/Salix/Ribes/Rosa/.	1993-07-02 00:00:00	Feiler, E.J., Anderson, R.S. and Koehler, P.A., 1997. Late Quaternary Paleoenvironments of the White River Plateau, Colorado, U.S.A. Arctic and Alpine Research, 29(1), pp.53-62.
DOMSV_neotoma	DOMSV	DOMSV	10.21233/n32g8h	Neotoma (last access: 1 April 2021)	700	720	Domsvatnet	70.3258	31.0259	120	Europe	Lake	Raw	37	AWI	5	132	10969	301	10837	The lake occupies a shallow oblong basin, measuring about 150 m by 600 m, between gently sloping hills covered by drift. There are no apparent influents and only a small stream as an outflow. The dominant vegetation on the surrounding slopes is a dwarf-shrub tundra with Betula nana, Empetrum, Salix, Arctostaphylos alpinum, and Rubus chamaemorus as prominent elements. Cottongrass-sedge communities…	1975-04-01 00:00:00	Hyvarinen, H., 1976. Flandrian pollen deposition rates and tree-line history in northern Fennoscandia. Boreas, 5(3), pp.163-175.	https://doi.org/10.1111/j.1502-3885.1976.tb00260.x
DOVJOK	DOVJOK	DOVJOK	10.21233/n3898n	Neotoma (last access: 1 April 2021)	703	723	Dovjok Swamp	48.75	28.25	274	Europe	Peat	Raw	48	AWI	9	69	8817	186.1	8748	Floodplain Phragmites fen. Physiography: floodplain in Murafa Basin. Surrounding vegetation: herb steppe, Quercus/Carpinus forest.	1988-01-01 00:00:00
DUCKPOND	DUCKPOND	DUCKPOND	10.21233/n32d96	Neotoma (last access: 1 April 2021)	753	772	Duck Pond	41.9327	-70.0005	2	North America	Lake	Raw	44	AWI	8	-53	14690	342.9	14743			Winkler, M.G., 1985. A 12,000-year history of vegetation and climate for Cape Cod, Massachusetts. Quaternary Research, 23(3), pp.301-312.	https://doi.org/10.1016/0033-5894(85)90037-7	Winkler, M.G., 1988. Paleolimnology of a Cape Cod kettle pond: diatoms and reconstructed pH. Ecological Monographs, 58(3), pp.197-214.	https://doi.org/10.2307/2937025
DUFRESNE	DUFRESNE	DUFRESNE	10.21233/n3bk68	Neotoma (last access: 1 April 2021)	754	773	Lac Dufresne	45.85	-70.35	650	North America	Lake	Raw	27	AWI	6	1	13168	506.4	13167			Mott, R.J., 1977. Late-Pleistocene and Holocene palynology in southeastern Quebec. Geographie physique et Quaternaire, 31(1-2), pp.139-149.	https://doi.org/10.7202/1000060ar
DUNNIC1	DUNNIC1	DUNNIC1	10.21233/n36w5r	Neotoma (last access: 1 April 2021)	755	774	Dunnigan Lake	47.7072	-91.6312	506	North America	Lake	Raw	16	AWI	15	-33	197.5	15.4	230.5	Shallow seepage lake. Surrounding vegetation: pine/aspen/spruce.	1984-01-24 00:00:00	Charles, D.F. and Whitehead, D.R., 1984. Paleoecological Investigation of Recent Lake Acidification (PIRLA): December 1984 Status Report. RP 2174-10, Electric Power Research Institute, Palo Alto, CA.		Charles, D.F. and Whitehead, D.R., 1986. Paleoecological Investigation of Recent Lake Acidification (PIRLA): Methods and Project Description. EPRI EA-4906, Electric Power Research Institute, Palo Alto, CA.		Shane, L.C., 1987. Northern Great Lakes States pollen and charcoal data. PIRLA Unpublished Report Series 9, Indiana University, Bloomington, IN.		Kingston, J.C., Cook, R.B., Kreis, R.G., Camburn, K.E., Norton, S.A., Sweets, P.R., Binford, M.W., Mitchell, M.J., Schindler, S.C., Shane, L.C.K. and King, G.A., 1990. Paleoecological investigation of recent lake acidification in the northern Great Lakes states. Journal of Paleolimnology, 4(2), pp.153-201.	https://doi.org/10.1007/BF00226322
EAGLE	EAGLE	EAGLE	10.21233/n3jd85	Neotoma (last access: 1 April 2021)	757	776	Eagle Lake Bog	44.1667	-71.6667	1275	North America	Peat	Raw	25	AWI	3	-63	10681	447.7	10744	Physiography: on Mount Lafayette.	1978-01-01 00:00:00	Spear, R.W., 1981. The history of high-elevation vegetation in the White Mountains of New Hampshire. Doctoral dissertation. University of Minnesota, Minneapolis, Minnesota, USA.
EAGLELK	EAGLELK	EAGLELK	10.21233/n3dq5w	Neotoma (last access: 1 April 2021)	758	777	Eagle Lake	53.2333	-58.55	400	North America	Lake	Raw	47	AWI	5	-52	13135	286.7	13187	Elongated basin near Eagle River. Physiography: Mecatina Plateau/Laurentian region. Surrounding vegetation: black spruce.	1977-01-01 00:00:00	Lamb, H.F., 1978. Post-glacial vegetation change in southeastern Labrador. Master's thesis. University of Minnesota, Minneapolis, Minnesota, USA.		Lamb, H.F., 1980. Late Quaternary vegetational history of southeastern Labrador. Arctic and Alpine research, 12(2), pp.117-135.	https://doi.org/10.1080/00040851.1980.12004172
EAGLENES	EAGLENES	EAGLENES	10.21233/n38x2k	Neotoma (last access: 1 April 2021)	759	778	Eaglenest Lake	57.75	-112.09	725	North America	Lake	Raw	52	AWI	7	-27	14234	279.6	14261	Large, flat-bottomed lake. Physiography: Birch Mountain Upland - rolling moraine. Surrounding vegetation: Picea mariana.	1982-04-24 00:00:00	Vance, R.E., 1986. Pollen stratigraphy of Eaglenest Lake, northeastern Alberta. Canadian Journal of Earth Sciences, 23(1), pp.11-20.	https://doi.org/10.1139/e86-002
EBALTIC	EBALTIC	EBALTIC	10.21233/n35w3p	Neotoma (last access: 1 April 2021)	763	782	East Baltic Bog	46.4083	-62.15	45	North America	Peat	Raw	38	AWI	3	-25	9676	262.2	9701	Raised Sphagnum bog. Physiography: gently rolling, Maritime Plain. Surrounding vegetation: spruce, maple, birch, hemlock.		Anderson, T.W., 1980. Holocene vegetation and climatic history of Prince Edward Island, Canada. Canadian Journal of Earth Sciences, 17(9), pp.1152-1165.	https://doi.org/10.1139/e80-122	Lowdon, J.A. and Blake, W., 1968. Geological Survey of Canada radiocarbon dates VII. Radiocarbon, 10(2), pp.207-245.	https://doi.org/10.1017/S0033822200010894
EDESSA	EDESSA	EDESSA	10.21233/n3hd97	Neotoma (last access: 1 April 2021)	765	784	Edessa	40.8181	21.9525	350	Europe	Peat	Raw	38	AWI	7	41	13232	356.5	13191	Marsh. Surrounding vegetation: Brushwood of deciduous oak.	1965-07-01 00:00:00	Bottema, S., 1974. Late Quaternary vegetation history of northwestern Greece. Doctoral dissertation. University of Groningen, Groningen, The Netherlands.
EDWARD	EDWARD	EDWARD	10.21233/n3cq6z	Neotoma (last access: 1 April 2021)	766	785	Edward Lake	44.36	-80.25	518	North America	Lake	Raw	81	AWI	4	-27	16155	202.3	16182			McAndrews, J.H., 1981. Late Quaternary climate of Ontario: temperature trends from the fossil pollen record. In: Quaternary paleoclimate ed. by W.C. Mahaney (pp.319-333). Geo Abstracts, Ltd., University of East Anglia, Norwich, United Kingdom.
EK4	EK4	EK4	10.21233/n34712	Neotoma (last access: 1 April 2021)	769	788	Elikchan 4 Lake	51.79	60.73	810	Asia	Lake	Raw	126	AWI	9	35	63528	507.9	63493	Morainally dammed lake. Physiography: valley lowland in mountainous region. Surrounding vegetation: Larix forest.	1991-04-01 00:00:00	Anderson, P.M. and Lozhkin, A.V., 2002. Late Quaternary Vegetation and Climate of Siberia and the Russian Far East (Palynological and Radiocarbon Database). North East Science Center, Far East Branch, Russian Academy of Sciences, Magadan, Russia.		Anderson, P.M., Lozhkin, A.V. and Belaya, B.V., 1998. Younger Dryas in western Beringia (northeastern Siberia). In: Environmental changes in Beringia during the Quaternary ed. by K.V. Simakov (pp.28-44). North East Interdisciplinary Research Institute, Far East Branch, Russian Academy of Sciences, Magadan (in Russian).		Anderson, P.M. and Lozhkin, A.V., 2001. The Stage 3 interstadial complex (Karginskii/middle Wisconsinan interval) of Beringia: variations in paleoenvironments and implications for paleoclimatic interpretations. Quaternary Science Reviews, 20(1-3), pp.93-125.	https://doi.org/10.1016/S0277-3791(00)00129-3	Lozhkin, A.V., 1995. A late Quaternary pollen record from Elikchan 4 Lake, northeast Siberia. Geology of the Pacific Ocean, 14, pp.18-22.		Lozhkin, A.V., Anderson, P.M. and Belaya, B.V., 1995. Radiocarbon dates and carbon zones from lacustrine sediments from the region of the Kolyma-Okhotsk drainage divide. Doklady Akademii Nauk, 343(3), pp.396-399 (in Russian).
ELDORA	ELDORA	ELDORA	10.21233/n30h6g	Neotoma (last access: 1 April 2021)	771	790	Eldora Fen	39.9367	-105.58	2848	North America	Peat	Raw	44	AWI	6	4	8786	204.2	8782	Drained fen. Physiography: Ute Mountains.	1969-09-01 00:00:00
ICDP5011-1	ELG107	ELG107	10.21233/n38p72	Neotoma (last access: 1 April 2021)	772	791	Elgygytgyn Stream Section	67.4167	172.083	490	Asia	Stream	Raw	4	AWI	2	5221	5975	251.3	754	Section on small stream. Physiography: impact crater. Surrounding vegetation: low shrub-lichen tundra with Salix.	1978-01-01 00:00:00	Glushkova, O.Y., Lozhkin, A.V. and Solomatkina, T.B., 1996. Stratigraphy and palaeogeography of the Elgygytgyn Lake in the Holocene (northwestern Chukotka). Geology of the Pacific Ocean, 12(4), pp.617-628 (in Russian).
ELGENNYA	ELGENNYA	ELGENNYA	10.21233/n34w54	Neotoma (last access: 1 April 2021)	773	792	Elgennya Lake	62.0833	149	1040	Asia	Lake	Raw	52	AWI	7	-51	18547	364.7	18598	Morainally dammed lake. Physiography: narrow upland valley bordered by mts. Surrounding vegetation: larch forest-tundra.	1993-07-01 00:00:00	Anderson, P.M. and Lozhkin, A.V., 2002. Late Quaternary Vegetation and Climate of Siberia and the Russian Far East (Palynological and Radiocarbon Database). North East Science Center, Far East Branch, Russian Academy of Sciences, Magadan, Russia.		Anderson, P.M., Lozhkin, A.V., Belaya, B.V., Glushkova, O.Y. and Brubaker, L.B., 1997. A lacustrine pollen record from near altitudinal forest limit, upper Kolyma region, northeastern Siberia. The Holocene, 7(3), pp.331-335.	https://doi.org/10.1177/095968369700700309	Lozhkin, A.V., Anderson, P.M., Belaya, B.V., Glushkova, O.Y., Kozhevinkova, M.V. and Kotova, L.N., 1996. Palynological characteristics and radiocarbon dates of sediments from Elgennya Lake, Upper Kolyma. In: Quaternary climates and vegetation of western Beringia ed. by Bychkov, Y.M. (pp.50-64). North East Interdisciplinary Research Institute, Far East Branch, Russian Academy of Sciences, Magadan …
EMERALD_neotoma	EMERALD_neotoma	EMERALD	10.21233/n3713p	Neotoma (last access: 1 April 2021)	776	796	Emerald Lake	44.07	-110.31	2634	North America	Lake	Raw	32	AWI	5	488	14953	466.6	14465	Glacial scour lake. Physiography: Pinyon Peak Highlands. Surrounding vegetation: Picea-Abies-Pinus albicaulis forest.	1985-08-01 00:00:00	Steventon, R.L. and Kutzbach, J.E., 1987. University of Wisconsin radiocarbon dates XXIV. Radiocarbon, 29(3), pp.397-415.	https://doi.org/10.1017/S0033822200043794	Steventon, R.L. and Kutzbach, J.E., 1988. University of Wisconsin radiocarbon dates XXV. Radiocarbon, 30(3), pp.367-383.	https://doi.org/10.1017/S0033822200044416	Whitlock, C., 1993. Postglacial vegetation and climate of Grand Teton and southern Yellowstone National Parks. Ecological Monographs, 63(2), pp.173-198.	https://doi.org/10.2307/2937179	Whitlock, C. and Bartlein, P.J., 1993. Spatial variations of Holocene climatic change in the Yellowstone region. Quaternary Research, 39(2), pp.231-238.	https://doi.org/10.1006/qres.1993.1026
ENM109	ENM109	ENM109	10.21233/n3cg89	Neotoma (last access: 1 April 2021)	779	799	Enmyvaam River, 2.5-3 m terrace	67.4333	172.167	491	Asia	Alluvial/Fluvial	Raw	10	AWI	6	2065	10865	977.8	8800	Alluvial terrace. Physiography: impact crater. Surrounding vegetation: low shrub tundra.	1978-01-01 00:00:00	Glushkova, O., Lozhkin, A.V. and Solomatkina, T.B., 1996. Stratigraphy and palaeogeography of the Elgygytgyn Lake in the Holocene (northwestern Chukotka). Geology of the Pacific Ocean, 12(4), pp.617-628 (in Russian).		Kaplina, T.N. and Chekovskii, A.L., 1987. Reconstruction of paleogeographic conditons during the Holocene climatic optimum in the Primorski Lowlands of Yakutia. In: Quaternary period of northeast Asia (pp.141-151). SVKNII, DVO USSR Academy of Sciences, Magadan, Russia (in Russian).		Lozhkin, A.V. and Vazhenina, L.N., 1987. The characteristics of vegetational development from the Kolyma lowland in the early Holocene. In: Quaternary period of northeast Asia ed. by V.P. Pokhialainen (pp.135-144). North East Interdisciplinary Research Institute, Far East Branch, USSR Academy of Sciences, Magadan (in Russian).
ENMYN	ENMYN	ENMYN	10.21233/n3403d	Neotoma (last access: 1 April 2021)	781	801	Enmynveem River	68.25	166	500	Asia	Alluvial/Fluvial	Raw	16	AWI	5	2881	10881	533.3	8000	Exposure of peat and colluvium. Physiography: river valley in rolling uplands. Surrounding vegetation: open Larix dahurica forest.		Anderson, P.M. and Lozhkin, A.V., 2002. Late Quaternary Vegetation and Climate of Siberia and the Russian Far East (Palynological and Radiocarbon Database). North East Science Center, Far East Branch, Russian Academy of Sciences, Magadan, Russia.
ENNADA72	ENNADA72	ENNADA72	10.21233/n3061g	Neotoma (last access: 1 April 2021)	782	802	Ennadai Lake, 1972 Site	61.2444	-100.951	325	North America	Lake	Raw	117	AWI	5	-55	4654	40.6	4709		1972-01-01 00:00:00	Nichols, H., 1975. Palynological and paleoclimatic study of the late Quaternary displacements of the boreal forest-tundra ecotone in Keewatin and Mackenzie, N.W.T., Canada. Occasional Paper 15. Institute of Arctic and Alpine Research, University of Colorado, Boulder, Colorado, USA.
ENNADAI	ENNADAI	ENNADAI	10.21233/n3fh88	Neotoma (last access: 1 April 2021)	783	803	Ennadai Lake	61.1667	-100.917	168	North America	Lake	Raw	31	AWI	12	-62	6813	229.2	6875	Peat bank. Physiography: Cockburn end moraine complex. Surrounding vegetation: Picea/Larix/Alnus/Salix.	1963-01-01 00:00:00	Bender, M.M., Bryson, R.A. and Baerreis, D.A., 1966. University of Wisconsin radiocarbon dates II. Radiocarbon, 8, pp.522-533.	https://doi.org/10.1017/S0033822200000333	Bender, M.M., Bryson, R.A. and Baerreis, D.A., 1967. University of Wisconsin radiocarbon dates III. Radiocarbon, 9, pp.530-544.	https://doi.org/10.1017/S0033822200000710	Nichols, H., 1967. The post-glacial history of vegetation and climate at Ennadai Lake, Keewatin, and Lynn Lake, Manitoba (Canada). E&G Quaternary Science Journal, 18(1), pp.176-197.	https://doi.org/10.3285/eg.18.1.12	Bender, M.M., Bryson, R.A. and Baerreis, D.A., 1965. University of Wisconsin radiocarbon dates I. Radiocarbon, 7, pp.399-407.	https://doi.org/10.1017/S0033822200037334	Nichols, H., 1967. Central Canadian palynology and its relevance to northwestern Europe in the late Quaternary period. Review of Palaeobotany and Palynology, 2(1-4), pp.231-243.	https://doi.org/10.1016/0034-6667(67)90151-0	Nichols, H., 1967. Pollen diagrams from sub-arctic central Canada. Science, 155(3770), pp.1665-1668.	https://doi.org/10.1126/science.155.3770.1665
ENTARNOY	ENTARNOY	ENTARNOY	10.21233/n39t37	Neotoma (last access: 1 April 2021)	784	804	Entarnoye Peat Exposure	59	78.3333	65	Asia	Peat	Raw	30	AWI	5	897	16136	525.5	15239	River bank exposure. Physiography: river lowland. Surrounding vegetation: Pinus-Betula taiga.		Anderson, P.M. and Lozhkin, A.V., 2002. Late Quaternary Vegetation and Climate of Siberia and the Russian Far East (Palynological and Radiocarbon Database). North East Science Center, Far East Branch, Russian Academy of Sciences, Magadan, Russia.		Arkhipov, S.A., Levina, T.P. and Panychev, V.A., 1980. Palynological characteristics of two Holocene peats from the middle and lower Ob River valley. In: Paleopalynology of Siberia ed. by V.N. Saks (pp.123-127). Nauka, Moscow (in Russian).		Neishtadt, M.I., 1976. About environmental changes in middle taiga of western Siberia during the Holocene. In: Palynology of the USSR ed. by E.D. Zaklinskaya and M.I. Neishtadt (pp.156-161). Nauka, Moscow (in Russian).
ERIE	ERIE	ERIE	10.21233/n36120	Neotoma (last access: 1 April 2021)	785	805	Lake Erie	41.92	-82.76	168	North America	Lake	Raw	38	AWI	3	24	16165	436.2	16141	Lake Erie.		Lewis, C.F.M. and Anderson, T.W., 1989. Oscillations of levels and cool phases of the Laurentian Great Lakes caused by inflows from glacial Lakes Agassiz and Barlow-Ojibway. Journal of Paleolimnology, 2(2), pp.99-146.	https://doi.org/10.1007/BF00177043
ESOOKE	ESOOKE	ESOOKE	10.21233/m5dr-hs85	Neotoma (last access: 1 April 2021)	788	808	East Sooke Fen	48.3519	-123.682	155	North America	Peat	Raw	93	AWI	5	180	13681	146.8	13501	Small fen basin. Physiography: rolling hills and flat plains. Surrounding vegetation: fir, cedar, pine, hemlock, alder.	1994-01-01 00:00:00	Brown, K.J. and Hebda, R.J., 2002. Origin, development, and dynamics of coastal temperate conifer rainforests of southern Vancouver Island, Canada. Canadian Journal of Forest Research, 32(2), pp.353-372.	https://doi.org/10.1139/x01-197	Brown, K.J. and Hebda, R.J., 2003. Coastal rainforest connections disclosed through a Late Quaternary vegetation, climate, and fire history investigation from the Mountain Hemlock Zone on southern Vancouver Island, British Colombia, Canada. Review of Palaeobotany and Palynology, 123(3-4), pp.247-269.	https://doi.org/10.1016/S0034-6667(02)00195-1
ETIVLIK	ETIVLIK	ETIVLIK	10.21233/n3j99h	Neotoma (last access: 1 April 2021)	790	811	Etivlik Lake	68.12	-156.07	631	North America	Lake	Raw	23	AWI	3	69	17146	776.2	17077	Morainally dammed lake. Physiography: low rolling hills. Surrounding vegetation: birch shrub tundra.	1984-07-01 00:00:00
ETWINOH	ETWINOH	ETWINOH	10.21233/n38t5p	Neotoma (last access: 1 April 2021)	9980	813	East Twin Lake	41.1962	-81.3348	321	North America	Lake	Raw	48	AWI	5	132	13505	284.5	13373	Kettle lake on the Kent Moraine, which is sand and gravel kame moraine in the vicinitty of East Twin Lake. Upland vegetation: fragmented pasture, row crops, and woodlots.	1988-04-01 00:00:00	Shane, L.C., 1989. The history of vegetation, climate, and relict plant paxa: palynology of the Gott Fen/Frame Lake Area, Portage Co., Ohio. Final Report to the Ohio Department of Natural Resources on 1988 Grant, Limnological Research Center, University of Minnesota, Minneapolis, Minnesota, USA.		Shane, L.C. and Anderson, K.H., 1993. Intensity, gradients and reversals in late glacial environmental change in east-central North America. Quaternary Science Reviews, 12(5), pp.307-320.	https://doi.org/10.1016/0277-3791(93)90039-O
EXCHEQUE	EXCHEQUE	EXCHEQUE	10.21233/n39g8p	Neotoma (last access: 1 April 2021)	794	816	Exchequer Meadow	37	-119.833	2219	North America	Peat	Raw	24	AWI	7	-53	15840	691	15893	Wet meadow. Physiography: Sierra Nevada Mountains. Surrounding vegetation: Pinus jeffreyi, Abies magnifica.	1985-09-01 00:00:00	Davis, O.K. and Moratto, M.J., 1988. Evidence for a warm dry early Holocene in the western Sierra Nevada of California: Pollen and plant macrofossil analysis of Dinkey and Exchequer Meadows. Madrono, 35(2), pp.132-149.
FALLBACK	FALLBACK	FALLBACK	10.21233/n3203s	Neotoma (last access: 1 April 2021)	796	818	Fallback Lake	43.9667	-110.433	2597	North America	Lake	Raw	31	AWI	5	10105	19103	299.9	8998	Glacial scour lake. Physiography: Pinyon Peak Highlands. Surrounding vegetation: Picea-Abies-Pinus albicaulis forest.	1986-08-01 00:00:00	Steventon, R.L. and Kutzbach, J.E., 1988. University of Wisconsin radiocarbon dates XXV. Radiocarbon, 30(3), pp.367-383.	https://doi.org/10.1017/S0033822200044416	Whitlock, C., 1993. Postglacial vegetation and climate of Grand Teton and southern Yellowstone National Parks. Ecological Monographs, 63(2), pp.173-198.	https://doi.org/10.2307/2937179
FAR	FAR	FAR	10.21233/n3cm5j	Neotoma (last access: 1 April 2021)	797	820	Lac Faribault	58.8669	-71.7169	250	North America	Lake	Raw	37	AWI	3	-68	5855	164.5	5923	Rock basin lake. Physiography: Morainic plateau. Surrounding vegetation: Shrub tundra / Forest tundra.	1976-07-19 00:00:00	Richard, P.J.H., 1981. Paleophytogeographie postglaciaire en Ungava par l'analyse pollinique. Collection Paleo-Quebec, 13, p.154 (in French).
FARN1	FARN1	FARN1	10.21233/n37t40	Neotoma (last access: 1 April 2021)	798	821	Tourbière de Farnham	45.2828	-72.9828	53	North America	Peat	Raw	24	AWI	4	-67	9588	419.8	9655	Ombrotrophic bog, partly wooded. Physiography: St-Lawrence lowland depression. Surrounding vegetation: Caryo - Aceretum sacchari.	1978-09-30 00:00:00
FAWN	FAWN	FAWN	10.21233/n3099j	Neotoma (last access: 1 April 2021)	800	823	Fawn Lake (CA:Ontario)	45.41	-79.39	333	North America	Lake	Raw	30	AWI	3	-30	12674	438.1	12704
FERNDAL1	FERNDAL1	FERNDAL1	10.21233/n3g99w	Neotoma (last access: 1 April 2021)	804	828	Ferndale Bog	34.4056	-95.8083	263	North America	Peat	Raw	28	AWI	4	1647	5840	155.3	4193	Peat bog on Jackfork sandstone ridge. Physiography: Ouachita Mountains. Surrounding vegetation: elm/oak/hickory/pine/willow.	1979-08-01 00:00:00	Albert, L.E. and Wyckoff, D.G., 1981. Ferndale Bog and Natural Lake: five thousand years of environmental change in southeastern Oklahoma. Studies in Oklahoma's Past 7. Oklahoma Archaeological Survey, Norman, Oklahoma, USA.		Hall, S.A., 1983. Ferndale Bog and Natural Lake: five thousand years of environmental change in southeastern Oklahoma. Plains Anthropologist, 28, pp.150-151.
FIDDLERS	FIDDLERS	FIDDLERS	10.21233/n3bm6m	Neotoma (last access: 1 April 2021)	805	829	Fiddler's Pond	56.25	-121.42	630	North America	Lake	Raw	45	AWI	3	-32	7894	180.1	7926	Kettle pond. Physiography: glaciated plateau. Surrounding vegetation: Populus, Symphoricarpos; Carex, Rumex.	1978-03-01 00:00:00	White, J.M. and Mathewes, R.W., 1982. Holocene vegetation and climatic change in the Peace River district, Canada. Canadian Journal of Earth Sciences, 19(3), pp.555-570.	https://doi.org/10.1139/e82-045
FLINFLON	FLINFLON	FLINFLON	10.21233/n37k7q	Neotoma (last access: 1 April 2021)	810	834	Beaverhouse Lake	54.7422	-101.682	305	North America	Lake	Raw	53	AWI	4	-22	10184	196.3	10206	Glacial scour lake.		Ritchie, J.C., 1976. The late-Quaternary vegetational history of the western interior of Canada. Canadian Journal of Botany, 54(15), pp.1793-1818.	https://doi.org/10.1139/b76-194	Ritchie, J.C., 1980. Towards a late-Quaternary palaeoecology of the Ice-Free Corridor. Canadian Journal of Anthropology, 1(1), pp.15-28.		Ritchie, J.C., 1985. Quaternary pollen records from the western interior and the arctic of Canada. In: Pollen records of Late-Quaternary North American sediments ed. by VM Bryant and RG Holloway (pp.327-352). American Association of Stratigraphic Palynologists Foundation, Dallas, Texas.		Ritchie, J.C. and Yarranton, G.A., 1978. The Late-Quaternary history of the boreal forest of central Canada, based on standard pollen stratigraphy and principal components analysis. Journal of Ecology, 66(1), pp.199-212.
FLOATIL1	FLOATIL1	FLOATIL1	10.21233/n33s5s	Neotoma (last access: 1 April 2021)	811	835	Floating Island Lake	44.55	-107.467	2609	North America	Lake	Raw	75	AWI	4	-9	10603	143.4	10612	Kettle lake with floating sedge mat. Physiography: Bighorn Mountains. Surrounding vegetation: lodgepole pine forest.	1974-06-01 00:00:00	Burkart, M.R., 1976. Pollen biostratigraphy and late Quaternary vegetation history of the Bighorn Mountains, Wyoming. Doctoral dissertation. University of Iowa, Iowa City, Iowa, USA.
FOREST1	FOREST1	FOREST1	10.21233/n3242s	Neotoma (last access: 1 April 2021)	816	841	Forest Pond 1	43.4712	-109.939	2797	North America	Lake	Raw	27	AWI	5	-66	9718	376.3	9784	Kettle pond. Physiography: high plateau in Wind River Range. Surrounding vegetation: clearcut in Pinus contorta.		Lynch, E.A., 1995. Origin of a park-forest vegetation mosaic in the Wind River Range, Wyoming. Doctoral dissertation. University of Minnesota, Minneapolis, Minnesota, USA.		Lynch, E.A., 1998. Origin of a park-forest vegetation mosaic in the Wind River Range, Wyoming. Ecology, 79(4), pp.1320-1338.	https://doi.org/10.1890/0012-9658(1998)079[1320:OOAPFV]2.0.CO;2
FOREST2	FOREST2	FOREST2	10.21233/n36k8s	Neotoma (last access: 1 April 2021)	817	843	Forest Pond 2	43.4389	-109.95	2766	North America	Lake	Raw	27	AWI	4	-65	9773	378.4	9838	Kettle pond. Physiography: high plateau in Wind River Range. Surrounding vegetation: Pinus contorta forest.		Lynch, E.A., 1995. Origin of a park-forest vegetation mosaic in the Wind River Range, Wyoming. Doctoral dissertation. University of Minnesota, Minneapolis, Minnesota, USA.		Lynch, E.A., 1998. Origin of a park-forest vegetation mosaic in the Wind River Range, Wyoming. Ecology, 79(4), pp.1320-1338.	https://doi.org/10.1890/0012-9658(1998)079[1320:OOAPFV]2.0.CO;2
FRAINSLK	FRAINSLK	FRAINSLK	10.21233/n38m5m	Neotoma (last access: 1 April 2021)	821	847	Frains Lake	42.33	-83.61	271	North America	Lake	Raw	34	AWI	10	88	17056	514.2	16968		1968-06-01 00:00:00	Kerfoot, W.C., 1974. Net accumulation rates and the history of cladoceran communities. Ecology, 55(1), pp.51-61.	https://doi.org/10.2307/1934617
FRBLAKE	FRBLAKE	FRBLAKE	10.21233/n34x5g	Neotoma (last access: 1 April 2021)	823	849	Hayes Lake	49.586	-93.7445	391	North America	Lake	Raw	56	AWI	3	173	13927	250.1	13754		1969-01-01 00:00:00	McAndrews, J.H., 1982. Holocene environment of a fossil bison from Kenora, Ontario. Ontario Archaeology, 37, pp.41-51.
FRENCH	FRENCH	FRENCH	10.21233/n3142g	Neotoma (last access: 1 April 2021)	824	850	French Lake	44.9458	-94.4207	327	North America	Lake	Raw	36	AWI	4	-58	3802	110.3	3860		1977-02-01 00:00:00	Grimm, E.C., 1983. Chronology and dynamics of vegetation change in the prairie-woodland region of southern Minnesota, USA. New Phytologist, 93(2), pp.311-350.	https://doi.org/10.1111/j.1469-8137.1983.tb03434.x
FRESHPND	FRESHPND	FRESHPND	10.21233/n35k73	Neotoma (last access: 1 April 2021)	826	852	Fresh Pond	41.16	-71.58	28	North America	Lake	Raw	43	AWI	5	-47	15010	358.5	15057	Kettle lake. Physiography: Block Island - morainal. Surrounding vegetation: Viburnum, Myrica, Amelanchier thickets.	1988-01-01 00:00:00	Dunwiddie, P.W., 1990. Postglacial vegetation history of coastal islands in southeastern New-England. National Geographic Research, 6(2), pp.178-195.
FRYINGPN	FRYINGPN	FRYINGPN	10.21233/n31w4t	Neotoma (last access: 1 April 2021)	827	853	Frying Pan Lake	38.61	-111.67	2720	North America	Lake	Raw	25	AWI	5	-54	10334	432.8	10388	Shallow lake behind Pleistocene moraine. Physiography: horst and graben plateau. Surrounding vegetation: Pinus/Pseudotsuga/Cercocarpus/Populus.		Shafer, D.S., 1989. The timing of late Quaternary monsoon precipitation maxima in the southwest United States. Doctoral dissertation. University of Arizona, Tucson, Arizona, USA.
FURNIVAL	FURNIVAL	FURNIVAL	10.21233/n37q6q	Neotoma (last access: 1 April 2021)	829	856	Furnival Lake	48.22	-84.93	440	North America	Lake	Raw	38	AWI	2	6	9590	259	9584
GABRIEL	GABRIEL	GABRIEL	10.21233/n33x55	Neotoma (last access: 1 April 2021)	830	857	Saint-Gabriel	46.2758	-73.4758	250	North America	Lake	Raw	58	AWI	6	13	10207	178.8	10194	Triangular rock basin. Physiography: till-covered hilly bedrock. Surrounding vegetation: Tilio - Aceretum sacchari.	1974-11-20 00:00:00	Richard, P.J.H., 1977. Histoire post-wisconsinienne de la vegetation du Quebec meridional par l'analyse pollinique. Service de la recherche, Direction generale des forets, Ministere des Terres et Forets du Quebec (in French).
GAGRA	GAGRA	GAGRA	10.21233/n3070f	Neotoma (last access: 1 April 2021)	831	858	Gagra	43.2833	40.2667	4	Europe	Peat	Raw	61	Neotoma_Giesecke et al. 2014 (MADCAP)	4	568	11603	183.9	11035	Marine terrace. Physiography: River month Kolkhidka. Surrounding vegetation: Anthropogenic.	1982-01-01 00:00:00	Kvavadze, E.V. and Rukhadze, L.P., 1989. Vegetation and climate of the Holocene of Abkhazia. Metsniereba, Tbilisi, Georgia. Scientific and Publishing Council of the Georgian SSR Academy of Sciences, p.136 (in Russian).		Kvavadze, E.V., 1982. Novye dannye po stratigrafii i paleogeografii Golotsena Kolkhidskoi nizmennosti. In: Chetvertichnaia Sistema Gruzii (pp.123-130). Metsniereba, Tbilisi.
GASS	GASS	GASS	10.21233/n34k85	Neotoma (last access: 1 April 2021)	833	860	Gass Lake	44.05	-87.73	211	North America	Lake	Raw	54	AWI	6	-50	15894	300.8	15944		1981-05-01 00:00:00	Webb, S.L., 1983. The Holocene extension of the range of American Beech (Fagus grandifolia) into Wisconsin: paleoecological evidence for long-distance seed dispersal. Doctoral dissertation. University of Minnesota, Minneapolis, Minnesota, USA.
GEK	GEK	GEK	10.21233/n3c61w	Neotoma (last access: 1 April 2021)	838	866	Gek Lake	63.3833	147.65	969	Asia	Lake	Raw	22	AWI	5	23	9896	470.1	9873	Morainally dammed lake. Physiography: glacial terrain in broad mt. valley. Surrounding vegetation: Larix dahurica forest-shrub tundra.	1995-07-01 00:00:00	Anderson, P.M. and Lozhkin, A.V., 2002. Late Quaternary Vegetation and Climate of Siberia and the Russian Far East (Palynological and Radiocarbon Database). North East Science Center, Far East Branch, Russian Academy of Sciences, Magadan, Russia.		Stetsenko, T.V., 1998. A pollen record from Holocene Lake deposits in the Malyk-Siena depression, upper Kolyma basin. In: Environmental changes in Beringia during the Quaternary ed. by K.V. Simakov (pp.63-68). North East Interdisciplinary Research Institute, Far East Branch, Russian Academy of Sciences, Magadan (in Russian).
GELMT	GELMT	GELMT	10.21233/n37c9d	Neotoma (last access: 1 April 2021)	839	867	Gel'myazevskoye	49.6667	31.8333	120	Europe	Peat	Raw	21	AWI	7	272	12017	587.2	11745	Fen bog. Physiography: depression. Surrounding vegetation: Forests and meadow steppes.	1978-08-01 00:00:00	Artyushenko, A.T., Arap, R.Y., Bezusko, L.G., Il'ves, E.O., Kajutkina, T.M. and Kovalyukh, N.N., 1982. Razvitie prirody tyerritorii SSSR v pozdnem pleiystoytsyene i golotsenye [New data of Holocene vegetation of Ukraine]. In: Nauka edition (pp.173-179). Moscow, Russia (in Russian).		Artyushenko, A.T., Parishkura-Turlo, S.I., Parchomenko, G.O., Arap, R.Y. and Bezusko, L.G., 1984. Obschaya i regionalnaya paleogeografia [History of Holocene vegetation of Ukraine]. In: Naukova dumka edition (pp.104-120). Kiev, Ukraine (in Russian).		Bezusko, L.G., Klimanov, V.A. and Sheliag-Sosonko, Y.R., 1988. Climatic conditions in Ukraine in the Late Post-glacial and Holocene. In: Paleoklimaty golotsena Evropeiyskoy territorii SSSR edition (pp.125-135). Moscow, Russia (in Russian).
GER	GER	GER	10.21233/n3f71v	Neotoma (last access: 1 April 2021)	842	871	Lac à St-Germain	45.9458	-74.3708	473	North America	Lake	Raw	62	AWI	4	13	13604	222.8	13591	Steep-sided rock basin lake. Physiography: hilly morainic landscape. Surrounding vegetation: Betulo luteae - Aceretum sacchari.	1977-01-01 00:00:00	Savoie, L. and Richard, P., 1979. Paleophytogeographie de l'episode de Saint-Narcisse dans la region de Sainte-Agathe, Quebec. Geographie physique et Quaternaire, 33(2), pp.175-188 (in French).	https://doi.org/10.7202/1000067ar
GERAIS	GERAIS	GERAIS	10.21233/n39h81	Neotoma (last access: 1 April 2021)	843	872	Serra Campos Gerais	-24.6667	-50.2167	1200	South America	Peat	Raw	37	AWI	4	-53	14618	407.5	14671	Peat bog. Physiography: highland plain, next to a river vally. Surrounding vegetation: farmland.	1994-12-01 00:00:00	Behling, H., 1997. Late Quaternary vegetation, climate and fire history of the Araucaria forest and campos region from Serra Campos Gerais, ParanaState (South Brazil). Review of palaeobotany and palynology, 97(1-2), pp.109-121.	https://doi.org/10.1016/S0034-6667(96)00065-6
GILES	GILES	GILES	10.21233/n35q7g	Neotoma (last access: 1 April 2021)	844	873	Giles	41.3771	-75.0932	732	North America	Lake	Raw	20	AWI	13	-32	296.5	17.3	328.5	Lake. Physiography: glaciated mountains. Surrounding vegetation: mixed deciduous/coniferous forest.	1984-01-01 00:00:00	Russell, E.W., Davis, R.B., Anderson, R.S., Rhodes, T.E. and Anderson, D.S., 1993. Recent centuries of vegetational change in the glaciated north-eastern United States. Journal of Ecology, 81(4), pp.647-664.	https://doi.org/10.2307/2261663
GLADKOYE	GLADKOYE	GLADKOYE	10.21233/n36d01	Neotoma (last access: 1 April 2021)	847	876	Gladkoye Bog	55	83.3333	80	Asia	Peat	Raw	57	AWI	12	133	11153	196.8	11020	Peat bog. Physiography: river valley. Surrounding vegetation: meadows-Betula-Populus forest.		Anderson, P.M. and Lozhkin, A.V., 2002. Late Quaternary Vegetation and Climate of Siberia and the Russian Far East (Palynological and Radiocarbon Database). North East Science Center, Far East Branch, Russian Academy of Sciences, Magadan, Russia.		Firsov, L.V., Volkova, V.S., Levina, T.P., Nikolaeva, I.V., Orlova, L.A., Panychev, V.A. and Volkov, I.A., 1982. The stratigraphy, geochronology, and standard spore-pollen diagram for Holocene peat, Gladkoye Bog, Novosibirsk. In: Problems of stratigraphy and paleogeography of the Pleistocene of Siberia ed. by S.A. Arkhipov (pp.96-107). Nauka, Novosibirsk (in Russian).		Orlova, L.A., 1990. The Holocene of Baraba (stratigraphy and radiocarbon chronology). Joint Institute for Geology, Geophysics and Mineralogy, Siberia Branch, USSR Academy of Sciences, Novosibirsk (in Russian).
GLENBORO	GLENBORO	GLENBORO	10.21233/n3j13g	Neotoma (last access: 1 April 2021)	849	878	Jones Lake [Glenboro site]	49.448	-99.2897	409	North America	Lake	Raw	83	AWI	5	-25	13892	169.7	13917	kettle lake	1965-03-01 00:00:00	Ritchie, J.C. and Lichti-Federovich, S., 1968. Holocene pollen assemblages from the Tiger Hills, Manitoba. Canadian Journal of Earth Sciences, 5(4), pp.873-880.	https://doi.org/10.1139/e68-083
GLUPEAT	GLUPEAT	GLUPEAT	10.21233/n38h93	Neotoma (last access: 1 April 2021)	851	880	Peat Exposure, Glukhoye Lake	59.75	149.917	10	Asia	Peat	Raw	6	AWI	6	3527	7866	867.8	4339	Peat exposure. Physiography: coastal lowland. Surrounding vegetation: Larix-Betula forest; graminoid meadows.		Anderson, P.M. and Lozhkin, A.V., 2002. Late Quaternary Vegetation and Climate of Siberia and the Russian Far East (Palynological and Radiocarbon Database). North East Science Center, Far East Branch, Russian Academy of Sciences, Magadan, Russia.		Lozhkin, A.V., Skorodumov, I.N., Meshkov, A.P. and Rovako, L.G., 2014. Changed paleogeographic environments in the region of Glukhoye Lake (north coast of the Okhotsk Sea) during the Pleistocene-Holocene transition. Doklady Akademii Nauk, 316(1), pp.184-188 (in Russian).
GOLDLKBG	GOLDLKBG	GOLDLKBG	10.21233/n35993	Neotoma (last access: 1 April 2021)	937	966	Gold Lake Bog	43.65	-122.042	1465	North America	Peat	Raw	24	AWI	6	-34	10964	478.2	10998	Sphagnum bog with trees and shrubs. Physiography: Cascade Range. Surrounding vegetation: Pseudotsuga/Tsuga mertensiana/Pinus.	1992-01-01 00:00:00	Sea, D.S. and Whitlock, C., 1995. Postglacial vegetation and climate of the Cascade Range, central Oregon. Quaternary Research, 43(3), pp.370-381.	https://doi.org/10.1006/qres.1995.1043
GOLUBOY	GOLUBOY	GOLUBOY	10.21233/n39p7c	Neotoma (last access: 1 April 2021)	939	968	Goluboye Lake	61.11	152.26	810	Asia	Lake	Raw	41	AWI	10	129	13471	333.6	13342	Lake formed by colluvial fan blockage. Physiography: glacial terrain in broad mt. valley. Surrounding vegetation: Larix dahurica-lichen woodland.	1995-07-01 00:00:00	Anderson, P.M. and Lozhkin, A.V., 2002. Late Quaternary Vegetation and Climate of Siberia and the Russian Far East (Palynological and Radiocarbon Database). North East Science Center, Far East Branch, Russian Academy of Sciences, Magadan, Russia.		Lozhkin, A.V., Anderson, P.M., Belaya, B.V., Glushkova, O.Y. and Stetsenko, T.V., 2000. Vegetation change in northeast Siberia at the Pleistocene-Holocene boundary and during the Holocene. In: The Quaternary period of Beringia ed. by K.V. Simakov (pp.53-75). North East Interdisciplinary Research Institute, Far East Branch, Russian Academy of Sciences, Magadan (in Russian).
GOSHEN	GOSHEN	GOSHEN	10.21233/n3604d	Neotoma (last access: 1 April 2021)	940	969	Goshen Springs	31.7211	-86.1342	105	North America	Peat	Raw	46	AWI	6	-57	53879	1198.6	53936		1976-11-01 00:00:00	Delcourt, P.A., Delcourt, H.R., Brister, R.C. and Lackey, L.E., 1980. Quaternary vegetation history of the Mississippi embayment. Quaternary Research, 13(1), pp.111-132.	https://doi.org/10.1016/0033-5894(80)90086-1
GOULD	GOULD	GOULD	10.21233/n3hh7h	Neotoma (last access: 1 April 2021)	941	971	Gould Pond	44.99	-69.32	89	North America	Lake	Raw	75	AWI	10	-26	15525	210.1	15551	Bedrock controlled kettle. Physiography: strongly rolling, bedrock controlled. Surrounding vegetation: white pine-northern hardwoods/spruce-fir.	1981-02-01 00:00:00	Jacobson Jr, G.L., Webb III, T. and Grimm, E.C., 1987. Patterns and rates of vegetation change during the deglaciation of eastern North America. In: North America and adjacent oceans during the last deglaciation ed. by Ruddiman, W.F. and Wright Jr, H.E. (pp.277-288). The Geology of North America K-3. Geological Society of America, Boulder, Colorado, USA.		Anderson, R.S., Jacobson Jr, G.L., Davis, R.B. and Stuckenrath, R., 1992. Gould Pond, Maine: late-glacial transitions from marine to upland environments. Boreas, 21(4), pp.359-371.	https://doi.org/10.1111/j.1502-3885.1992.tb00040.x
GRAHAM	GRAHAM	GRAHAM	10.21233/n38130	Neotoma (last access: 1 April 2021)	943	973	Graham Lake	45.19	-77.36	381	North America	Lake	Raw	215	AWI	6	-55	14182	66.5	14237	Closed bedrock basin lake. Physiography: rough relief on Algonquin Highlands. Surrounding vegetation: Acer/Pinus/Fagus/Quercus/Tilia/Betula.		Fuller, J.L., 1995. Holocene forest dynamics in Southern Ontario, Canada. Doctoral dissertation. University of Cambridge, Cambridge, U.K.		Fuller, J.L., 1997. Holocene forest dynamics in southern Ontario, Canada: fine-resolution pollen data. Canadian Journal of Botany, 75(10), pp.1714-1727.	https://doi.org/10.1139/b97-886	Fuller, J.L., 1998. Ecological impact of the mid-Holocene hemlock decline in southern Ontario, Canada. Ecology, 79(7), pp.2337-2351.	https://doi.org/10.1890/0012-9658(1998)079[2337:EIOTMH]2.0.CO;2
GRANDRAP	GRANDRAP	GRANDRAP	10.21233/n34b0q	Neotoma (last access: 1 April 2021)	944	974	Grand Rapids	53	-98.25	350	North America	Lake	Raw	25	AWI	3	289	8462	340.5	8173		1970-04-01 00:00:00	Ritchie, J.C. and Hadden, K.A., 1975. Pollen stratigraphy of Holocene sediments from the Grand Rapids area, Manitoba, Canada. Review of Palaeobotany and Palynology, 19(3), pp.193-202.	https://doi.org/10.1016/0034-6667(75)90040-8
GRAS_neotoma	GRAS_neotoma	GRAS	10.21233/n38s5b	Neotoma (last access: 1 April 2021)	946	976	Lac Gras	52.25	-67.0667	530	North America	Lake	Raw	28	AWI	5	-43	7915	294.7	7958	Minimal relief, sandy terraces, eskers. Physiography: Lake Plateau, stream-fed. Surrounding vegetation: black spruce, lichen woodlands.	1981-07-01 00:00:00	King, G.A., 1986. Deglaciation and vegetation history of western Labrador and adjacent Quebec. Doctoral dissertation. University of Minnesota, Minneapolis, Minnesota, USA.
GRASVATN	GRASVATN	GRASVATN	10.21233/n3503q	Neotoma (last access: 1 April 2021)	947	977	Grasvatn	63.7029	8.68909	46	Europe	Lake	Raw	45	AWI	8	162	12479	279.9	12317	Shallow lake on the island of Froya. Overgrown by aquatics. Physiography: Shellsand on gneisses. Surrounding vegetation: Heather, fens and bogs.	1978-05-01 00:00:00	Moe, D., Vorren, K.D., Alm, T., Fimreite, S., Morkved, B., Nilssen, E., Paus, A., Ramfjord, H., Selvik, S.F. and Sorensen, R., 1996. Norway. In: Palaeoecological events during the last 15000 years: regional syntheses of palaeoecological studies of lakes and mires in Europe ed. by B.E. Berglund, H.J.B. Birks, M. Ralska-Jasiewiczowa, and H.E. Wright (pp.153-213). John Wiley & Sons, Chichester, Unit…		Paus, A., 1982. Paleo-okologiske undersokelser pa Froya, Sor-Trondelag. Den vegetasjonshistoriske utviklingen fra senistiden og fram til idag. Master's thesis. University of Trondheim, Trondheim, Norway (in Norwegian).
GRAVEL	GRAVEL	GRAVEL	10.21233/n3191t	Neotoma (last access: 1 April 2021)	948	978	Gravel Ridge	55.0333	-62.6333	565	North America	Lake	Raw	45	AWI	9	-65	7463	171.1	7528	Bedrock hollow. Physiography: Harp lake uplands. Surrounding vegetation: tundra/Picea.		Lamb, H.F., 1982. Late Quaternary vegetational history of the forest-tundra ecotone in North-Central Labrador. Doctoral dissertation. University of Cambridge, Cambridge, England.		Lamb, H.F., 1985. Palynological evidence for postglacial change in the position of tree limit in Labrador. Ecological Monographs, 55(2), pp.241-258.	https://doi.org/10.2307/1942559
GREENLK	GREENLK	GREENLK	10.21233/n3bt6p	Neotoma (last access: 1 April 2021)	952	982	Green Lake	44.88	-85.13	305	North America	Lake	Raw	45	AWI	3	380	15364	340.5	14984		1972-03-01 00:00:00	Lawrenz, R.W., 1975. The developmental paleoecology of Green Lake Antrim County, Michigan. Master's thesis. Central Michigan University, Mount Pleasant, Michigan, USA.
GRENADIE	GRENADIE	GRENADIE	10.21233/n3cg9p	Neotoma (last access: 1 April 2021)	956	986	Grenadier Pond	43.64	-79.47	76	North America	Lake	Raw	79	AWI	7	-34	4511	58.3	4545	Pond isolated by a bar from Lake Ontario.		McCarthy, F.M.G., 1986. Late Holocene water levels in Lake Ontario: evidence from Grenadier Pond. Master's thesis. University of Toronto, Toronto, Ontario, Canada.		McCarthy, F.M. and McAndrews, J.H., 1988. Water levels in Lake Ontario 4230-2000 years BP: evidence from Grenadier Pond, Toronto, Canada. Journal of Paleolimnology, 1(2), pp.99-113.
GREYIS	GREYIS	GREYIS	10.21233/n37s6d	Neotoma (last access: 1 April 2021)	957	987	Grey Islands	50.7667	-55.5315	104	North America	Lake	Raw	75	AWI	6	-35	10940	148.3	10975	Stream fed lake w/in exposed bedrock. Physiography: Appalachain Phys Reg, uplands. Surrounding vegetation: dwarf shrub barrens, some black spruce.	1987-07-01 00:00:00	Evans, N.S., 2002. An Investigation of the Holocene Pollen Record from the Grey Islands, Newfoundland. Master's thesis. Memorial University of Newfoundland, St. John's, Newfoundland, Canada.
GURSKII	GURSKII	GURSKII	10.21233/n3jd9j	Neotoma (last access: 1 April 2021)	966	997	Gurskii Peat [Site 4381]	50.0667	137.083	15	Asia	Peat	Raw	31	AWI	7	203	13840	454.6	13637	Peat exposure in drainage channel. Physiography: river valley. Surrounding vegetation: bog shrubs and Sphagnum.	1986-08-10 00:00:00	Anderson, P.M. and Lozhkin, A.V., 2002. Late Quaternary Vegetation and Climate of Siberia and the Russian Far East (Palynological and Radiocarbon Database). North East Science Center, Far East Branch, Russian Academy of Sciences, Magadan, Russia.		Korotky, A.M., 1982. Paleographic conditions of the formation of Quaternary peats (south of Far East). In: Modern sedimentation and morpholithogenesis of the Far East ed. by S.P. Pletnev and V.S. Pushkar (pp.58-71). Far Eastern Science Center, USSR Academy of Sciences, Vladivostok (in Russian).		Korotky, A.M., Kovalyukh, N.N. and Volkov, V.G., 1989. Radiocarbon dating of Quaternary deposits (south Far East). Preprint. Far East Branch of the USSR Academy of Sciences, Vladivostok (in Russian).		Sochava, V.B., 1968. The map of vegetation of the Amur Basin. Geodesy and Cartography Administration, Leningrad (in Russian).
GYTGYKAI	GYTGYKAI	GYTGYKAI	10.21233/n3dm80	Neotoma (last access: 1 April 2021)	967	998	Gytgykai Lake	63.1667	175	102	Asia	Lake	Raw	68	AWI	5	6306	23813	261.3	17507	Physiography: glacial terrain in tectonic valley. Surrounding vegetation: Pinus pumila-Alnus fruticosa tundra.	1991-07-01 00:00:00	Anderson, P.M. and Lozhkin, A.V., 2002. Late Quaternary Vegetation and Climate of Siberia and the Russian Far East (Palynological and Radiocarbon Database). North East Science Center, Far East Branch, Russian Academy of Sciences, Magadan, Russia.		Lozhkin, A.V., Anderson, P.M., Brubaker, L.B., Kotov, A.N., Kotova, L.N., Prokhorova, T.P. and Simakov, K.V., 1998. The herb pollen zone from sediments of glacial lakes. In: Environmental Changes in Beringia During the Quaternary ed. by K.V. Simakov (pp.96-111). North East Interdisciplinary Research Institute, Far East Branch, Russian Academy of Sciences, Magadan (in Russian).
HACK	HACK	HACK	10.21233/n38x3z	Neotoma (last access: 1 April 2021)	968	999	Hack Pond	37.9847	-78.9972	469	North America	Lake	Raw	36	AWI	2	-51	22173	635	22224	Solution hollow. Surrounding vegetation: Quercus, Pinus, Carya, Castanea, Juniper.	1965-11-07 00:00:00	Stuiver, M., 1969. Yale natural radiocarbon measurements IX. Radiocarbon, 11(2), pp.545-658.	https://doi.org/10.1017/S0033822200011413	Craig, A.J., 1969. Vegetational history of the Shenandoah Valley, Virginia. Geological Society of America Special Paper, 123, pp.283-296.
HAFICHUK	HAFICHUK	HAFICHUK	10.21233/n3542q	Neotoma (last access: 1 April 2021)	969	1000	Hafichuk Site	50.3206	-105.884	740	North America	Lake	Raw	34	AWI	3	11805	13476	50.6	1671	Ephemeral prairie pothole pond. Physiography: disintegration moraine.	1962-07-01 00:00:00	de Vries, B., 1964. An investigation of a late-glacial deposit from the Missouri Coteau in Saskatchewan. Master's thesis. University of Manitoba, Winnipeg, Manitoba, Canada.		Ritchie, J.C. and Vries, B.D., 1964. Contributions to the Holocene paleoecology of westcentral Canada: a late-glacial deposit from the Missouri Coteau. Canadian Journal of Botany, 42(6), pp.677-692.	https://doi.org/10.1139/b64-063
HAIL	HAIL	HAIL	10.21233/n31d9w	Neotoma (last access: 1 April 2021)	970	1001	Hail Lake	60.0333	-129.017	690	North America	Lake	Raw	84	AWI	8	0	11809	142.3	11809	Small lake. Surrounding vegetation: Picea mariana, P. glauca, Pinus contorta.		Cwynar, L. and Spear, R., 1995. Paleovegetation and paleoclimatic changes in the Yukon at 6 ka BP. Geographie physique et Quaternaire, 49(1), pp.29-35.	https://doi.org/10.7202/033027ar
HAMSLAKE	HAMSLAKE	HAMSLAKE	10.21233/n39k8q	Neotoma (last access: 1 April 2021)	971	1002	Hams Lake	43.24	-80.41	301	North America	Lake	Raw	85	AWI	10	-37	12975	154.9	13012	Kettle lake. Physiography: glacial moraine. Surrounding vegetation: beech-maple forest, near oak plains.	1984-02-01 00:00:00	Bennett, K.D., 1987. Holocene history of forest trees in southern Ontario. Canadian Journal of Botany, 65(9), pp.1792-1801.	https://doi.org/10.1139/b87-248	McAndrews, J.H. and Campbell, I.D., 1993. 6 ka mean July temperature in eastern Canada from Bartlein and Webb's (1985) pollen transfer functions: comments and illustrations. In: Proxy climate data and models of the six thousand years before present time interval: the Canadian perspective ed. by A. Telka (pp.22-25). Canadian Global Change Program Incidental Report Series IR93-3. The Royal Society …
HANGING	Hanging_Lake	HANGING	10.21233/n35s6s	Neotoma (last access: 1 April 2021)	972	1003	Hanging Lake	68.3833	-138.383	500	North America	Lake	Raw	133	AWI	22	-67	36782	279.2	36849	Small lake in broad basin. Physiography: undulating tundra surface. Surrounding vegetation: tussock tundra/wet sedge/heath/fellfield.		Cwynar, L.C., 1980. A Late-Quaternary vegetation history from Hanging Lake, northern Yukon. Doctoral dissertation. University of Toronto, Toronto, Ontario, Canada.		Cwynar, L.C., 1982. A Late-Quaternary Vegetation History from Hanging Lake, Northern Yukon. Ecological Monographs, 52(1), pp.1-24.	https://doi.org/10.2307/2937342	ACER project members; Sanchez Goñi, Maria Fernanda; Desprat, Stéphanie; Daniau, Anne-Laure; Cwynar, Les C (2017): CLAM age model and pollen profile of sediment core Hanging_Lake. PANGAEA	https://doi.org/10.1594/PANGAEA.872865	Sánchez Goñi, M.F., Desprat, S., Daniau, A.L., Bassinot, F.C., Polanco-Martínez, J.M., Harrison, S.P., Allen, J.R., Anderson, R.S., Behling, H., Bonnefille, R. and Burjachs, F., 2017. The ACER pollen and charcoal database: a global resource to document vegetation and fire response to abrupt climate changes during the last glacial period. Earth System Science Data, 9(2), pp.679-695.	https://doi.org/10.5194/essd-9-679-2017	Cwynar, L.C., 1982. A Late‐Quaternary Vegetation History from Hanging Lake, Northern Yukon: Ecological Archives M052-001. Ecological Monographs, 52(1), pp.1-24.	https://doi.org/10.2307/2937342
HARDING	HARDING	HARDING	10.21233/n3hf05	Neotoma (last access: 1 April 2021)	975	1006	Harding Lake	64.4444	-146.908	213	North America	Lake	Raw	41	AWI	4	37	24182	603.6	24145	Small lake. Physiography: glacial valley bottom.		Ager, T.A., 1982. Pollen studies of Quaternary-age sediments in the Tanana Valley (Alaska). In: United States Geological Survey in Alaska: Accomplishments during 1980 ed. by W. Conrad (pp.64-67). USGS Circular 844.		Ager, T.A. and Brubaker, L.B., 1985. Quaternary palynology and vegetational history of Alaska. In: Pollen records of late Quaternary North American sediments ed. by V.M. Bryant, Jr. and R.G. Holloway (pp.353-384). American Association of Stragigraphic Palynologists Foundation, Dallas, Texas, USA.		Ager, T.A., 1983. Holocene vegetational history of Alaska. In: Late-Quaternary Environments of the United States. Volume 2. The Holocene ed. by Wright Jr, H.E. (pp.128-141). University of Minnesota Press. Minneapolis, Minnesota, USA.		Nakao, K., La Perriere, J. and Ager, T.A., 1980. Climatic changes in interior Alaska. In: Climatic Changes in Interior Alaska ed. by K. Nakao (pp.16-23). Hokkaido Univesity, Department of Geophysics, Sapporo, Japan.
HARRIE	HARRIE	HARRIE	10.21233/n37x41	Neotoma (last access: 1 April 2021)	977	1008	Harrie Lake	52.9333	-66.95	530	North America	Lake	Raw	31	AWI	6	-8	7313	244	7321	Fluvial origin, gently rolling terrain. Physiography: Lake Plateau. Surrounding vegetation: lichen woodland, black and white spruce.	1981-07-01 00:00:00	King, G.A., 1986. Deglaciation and vegetation history of western Labrador and adjacent Quebec. Doctoral dissertation. University of Minnesota, Minneapolis, Minnesota, USA.
HAYLAKE	Hay_Lake	HAYLAKE	10.21233/n38k71	Neotoma (last access: 1 April 2021)	982	1013	Hay Lake	34	-109.43	2780	North America	Lake	Raw	46	AWI	7	19	48502	1077.4	48483	Lake on basaltic bedrock. Physiography: White Mountains. Surrounding vegetation: Pinus-Pseudotsuga-Abies-Juniperus.	1980-10-31 00:00:00	Jacobs, B.F., 1983. Past vegetation and climate of the Mogollon Rim Area, Arizona. Doctoral dissertation. University of Arizona, Tucson, Arizona, USA.		Jacobs, B.F., 1985. A middle Wisconsin pollen record from Hay Lake, Arizona. Quaternary Research, 24(1), pp.121-130.	https://doi.org/10.1016/0033-5894(85)90088-2	ACER project members; Sanchez Goñi, Maria Fernanda; Desprat, Stéphanie; Daniau, Anne-Laure; Jacobs, Bonnie Fine (2017): CLAM age model and pollen profile of sediment core Hay_Lake. PANGAEA	https://doi.org/10.1594/PANGAEA.872866	Sánchez Goñi, M.F., Desprat, S., Daniau, A.L., Bassinot, F.C., Polanco-Martínez, J.M., Harrison, S.P., Allen, J.R., Anderson, R.S., Behling, H., Bonnefille, R. and Burjachs, F., 2017. The ACER pollen and charcoal database: a global resource to document vegetation and fire response to abrupt climate changes during the last glacial period. Earth System Science Data, 9(2), pp.679-695.	https://doi.org/10.5194/essd-9-679-2017
HEADWATR	HEADWATR	HEADWATR	10.21233/n3fd87	Neotoma (last access: 1 April 2021)	992	1024	Headwaters Lake	67.9333	-155.05	820	North America	Lake	Raw	30	AWI	3	-69	13651	473.1	13720	Kettle lake. Physiography: mountainous. Surrounding vegetation: birch shrub tundra.	1978-08-01 00:00:00	Brubaker, L.B., Garfinkee, H.L. and Edwards, M.E., 1983. A late Wisconsin and Holocene vegetation history from the central Brooks Range: implications for Alaskan palaeoecology. Quaternary Research, 20(2), pp.194-214.
HEBRON_neotoma	HEBRON_neotoma	HEBRON	10.21233/n35x4d	Neotoma (last access: 1 April 2021)	996	1028	Hebron Lake	58.2	-63.0333	170	North America	Lake	Raw	17	AWI	3	-64	8990	565.9	9054	Small lake near Torngat mountains. Physiography: bedrock controlled plateaus. Surrounding vegetation: shrub tundra.		Lamb, H.F., 1984. Modern pollen spectra from Labrador and their use in reconstructing Holocene vegetational history. Journal of Ecology, 72(1), pp.37-59.	https://doi.org/10.2307/2260005	Lamb, H.F., 1982. Late Quaternary vegetational history of the forest-tundra ecotone in North-Central Labrador. Doctoral dissertation. University of Cambridge, Cambridge, England.
HEDRICK	HEDRICK	HEDRICK	10.21233/n3bd08	Neotoma (last access: 1 April 2021)	997	1030	Hedrick Pond	43.75	-110.6	2073	North America	Lake	Raw	75	AWI	5	-59	20882	283	20941	Kettle lake. Physiography: stagnation moraine, Hedrick Pond Advance. Surrounding vegetation: open forest, Pinus contorta, Pseudotsuga.	1986-08-01 00:00:00	Steventon, R.L. and Kutzbach, J.E., 1988. University of Wisconsin radiocarbon dates XXV. Radiocarbon, 30(3), pp.367-383.	https://doi.org/10.1017/S0033822200044416	Whitlock, C., 1993. Postglacial vegetation and climate of Grand Teton and southern Yellowstone National Parks. Ecological Monographs, 63(2), pp.173-198.	https://doi.org/10.2307/2937179	Whitlock, C. and Bartlein, P.J., 1993. Spatial variations of Holocene climatic change in the Yellowstone region. Quaternary Research, 39(2), pp.231-238.	https://doi.org/10.1006/qres.1993.1026
HEN	HEN	HEN	10.21233/n3j71s	Neotoma (last access: 1 April 2021)	1000	1033	Tourbière de Lanoraie HENRI	45.9889	-73.3	18	North America	Peat	Raw	26	AWI	6	227	7303	283	7076	Ombrotrophic bog, ericaceous cover. Physiography: dissected deltaic plain. Surrounding vegetation: Caryo - Aceretum sacchari.	1978-01-01 00:00:00	Comtois, P.G., 1979. Histoire holocene du climat et de la vegetation a Lanoraie. Master's thesis. Universite de Montreal, Quebec, Canada (in French).		Comtois, P., 1982. Histoire holocene du climat et de la vegetation a Lanoraie (Quebec). Canadian Journal of Earth Sciences, 19(10), pp.1938-1952 (in French).	https://doi.org/10.1139/e82-172
HIDDEN	HIDDEN	HIDDEN	10.21233/n3c717	Neotoma (last access: 1 April 2021)	1071	1104	Hidden Lake	63.94	-144.658	343	North America	Lake	Raw	33	AWI	5	-19	19377	606.1	19396	Morainally dammed glacial scour lake. Physiography: Kenai mountains. Surrounding vegetation: Picea/Tsuga/Betula/Populus/Alnus/Salix.		Ager, T.A., 1983. Holocene vegetational history of Alaska. In: Late-Quaternary Environments of the United States. Volume 2. The Holocene ed. by Wright Jr, H.E. (pp.128-141). University of Minnesota Press. Minneapolis, Minnesota, USA.		Ager, T.A. and Sims, J.D., 1984. Postglacial pollen and tephra records from lakes in the Cook Inlet region, southern Alaska. In: The United States Geological Survey in Alaska: Accomplishments During 1981 ed. by W.L. Conrad and R.L. Elliot (pp.103-105). U.S. Geological Survey Circular 868.		Ager, T.A. and Brubaker, L.B., 1985. Quaternary palynology and vegetational history of Alaska. In: Pollen records of late Quaternary North American sediments ed. by V.M. Bryant, Jr. and R.G. Holloway (pp.353-384). American Association of Stragigraphic Palynologists Foundation, Dallas, Texas, USA.		Rymer, M.J. and Sims, J.D., 1982. Lake-sediment evidence for the date of deglaciation of the Hidden Lake area, Kenai Peninsula, Alaska. Geology, 10(6), pp.314-316.	https://doi.org/10.1130/0091-7613(1982)10<314:LEFTDO>2.0.CO;2
HIGHLAKE	HIGHLAKE	HIGHLAKE	10.21233/n37d9r	Neotoma (last access: 1 April 2021)	1072	1105	High Lake	44.5167	-76.6	192	North America	Lake	Raw	191	AWI	9	-67	13837	73.2	13904	Closed lake in bedrock basin. Physiography: rough relief in Algonquin Highlands. Surrounding vegetation: Pinus/Picea/Tsuga/Abies/Acer/Quercus.		Fuller, J.L., 1995. Holocene forest dynamics in Southern Ontario, Canada. Doctoral dissertation. University of Cambridge, Cambridge, U.K.		Fuller, J.L., 1997. Holocene forest dynamics in southern Ontario, Canada: fine-resolution pollen data. Canadian Journal of Botany, 75(10), pp.1714-1727.	https://doi.org/10.1139/b97-886	Fuller, J.L., 1998. Ecological impact of the mid-Holocene hemlock decline in southern Ontario, Canada. Ecology, 79(7), pp.2337-2351.	https://doi.org/10.1890/0012-9658(1998)079[2337:EIOTMH]2.0.CO;2
HONEYMOO	HONEYMOO	HONEYMOO	10.21233/n33q7v	Neotoma (last access: 1 April 2021)	1074	1107	Honeymoon Pond	64.6333	-138.4	1160	North America	Lake	Raw	71	AWI	19	-25	10791	154.5	10816	Just inside terminal moraines. Physiography: Southern Ogilvie Ranges. Surrounding vegetation: shrub tundra, isolated Picea groves.		Cwynar, L.C. and Spear, R.W., 1991. Reversion of forest to tundra in the central Yukon. Ecology, 72(1), pp.202-212.	https://doi.org/10.2307/1938915
HOSTAGE	HOSTAGE	HOSTAGE	10.21233/n34c9g	Neotoma (last access: 1 April 2021)	1078	1111	Hostage Lake	46.55	-94.1333	368	North America	Lake	Raw	13	AWI	3	-26	4675	391.8	4701	Kettle lake in pitted outwash plain. Physiography: Crow Wing Outwash Plain. Surrounding vegetation: Pinus banksiana forest.	1981-03-07 00:00:00	Almendinger, J.C., 1992. The late Holocene history of prairie, brush-prairie, and jack pine (Pinus banksiana) forest on outwash plains, north-central Minnesota, USA. The Holocene, 2(1), pp.37-50.	https://doi.org/10.1177/095968369200200105	Almendinger, J.C., 1985. The late-Holocene development of jack pine forests on outwash plains, north-central Minnesota. Doctoral dissertation. University of Minnesota, Minneapolis, Minnesota, USA.
HOWES	HOWES	HOWES	10.21233/n3b729	Neotoma (last access: 1 April 2021)	1081	1114	Howes Prairie Marsh	41.65	-87.0722	185	North America	Peat	Raw	20	AWI	4	-21	4022	212.8	4043	Interdunal depression (panne). Physiography: coastal dunes. Surrounding vegetation: oak-hickory forest, prairie.		Cole, K.L. and Taylor, R.S., 1995. Past and current trends of change in a dune prairie/oak savanna reconstructed through a multiple-scale history. Journal of Vegetation Science, 6(3), pp.399-410.	https://doi.org/10.2307/3236239
HUDSONLK	HUDSONLK	HUDSONLK	10.21233/n30t6k	Neotoma (last access: 1 April 2021)	1100	1133	Hudson Lake	41.72	-86.55	239	North America	Lake	Raw	73	AWI	6	190	15659	214.8	15469		1969-08-01 00:00:00	Bailey, R.E., 1972. Late- and postglacial environmental changes in northwestern Indiana. Doctoral dissertation. Indiana University, Bloomington, Indiana, USA.
HUMBER3	HUMBER3	HUMBER3	10.21233/n3562d	Neotoma (last access: 1 April 2021)	1102	1135	Humber Pond 3	43.64	-79.48	74	North America	Lake	Raw	59	AWI	4	-42	4407	76.7	4449	Floodplain pond. Physiography: Humber River floodplain. Surrounding vegetation: urban Toronto.		Weninger, J.M. and McAndrews, J.H., 1989. Late Holocene aggradation in the lower Humber River valley, Toronto, Ontario. Canadian Journal of Earth Sciences, 26(9), pp.1842-1849.	https://doi.org/10.1139/e89-157
HUMBER5	HUMBER5	HUMBER5	10.21233/n31g9k	Neotoma (last access: 1 April 2021)	1103	1136	Humber Pond 5	43.64	-79.49	74	North America	Lake	Raw	34	AWI	3	-20	4491	136.7	4511	Floodplain pond. Physiography: Humber River floodplain. Surrounding vegetation: urban Toronto.		Weninger, J.M. and McAndrews, J.H., 1989. Late Holocene aggradation in the lower Humber River valley, Toronto, Ontario. Canadian Journal of Earth Sciences, 26(9), pp.1842-1849.	https://doi.org/10.1139/e89-157
HUMBER7	HUMBER7	HUMBER7	10.21233/n3gt6x	Neotoma (last access: 1 April 2021)	1104	1137	Humber Pond 7	43.65	-79.5	74	North America	Lake	Raw	49	AWI	2	-15	3741	78.2	3756	Floodplain pond. Physiography: Humber River floodplain. Surrounding vegetation: urban Toronto.
HUSTLER	HUSTLER	HUSTLER	10.21233/n3c149	Neotoma (last access: 1 April 2021)	1105	1138	Hustler Lake	48.2298	-92.1601	401	North America	Lake	Raw	16	Neotoma_PalEON-STEPPS	11	-32	144	11.7	176	Drainage lake in Boundary Waters Area. Surrounding vegetation: pine/aspen/spruce.	1984-02-23 00:00:00	Charles, D.F. and Whitehead, D.R., 1984. Paleoecological Investigation of Recent Lake Acidification (PIRLA): December 1984 Status Report. RP 2174-10, Electric Power Research Institute, Palo Alto, CA.		Charles, D.F. and Whitehead, D.R., 1986. Paleoecological Investigation of Recent Lake Acidification (PIRLA): Methods and Project Description. EPRI EA-4906, Electric Power Research Institute, Palo Alto, CA.		Shane, L.C., 1987. Northern Great Lakes States pollen and charcoal data. PIRLA Unpublished Report Series 9, Indiana University, Bloomington, IN.		Kingston, J.C., Cook, R.B., Kreis, R.G., Camburn, K.E., Norton, S.A., Sweets, P.R., Binford, M.W., Mitchell, M.J., Schindler, S.C., Shane, L.C.K. and King, G.A., 1990. Paleoecological investigation of recent lake acidification in the northern Great Lakes states. Journal of Paleolimnology, 4(2), pp.153-201.	https://doi.org/10.1007/BF00226322
HYNES	HYNES	HYNES	10.21233/n37b0n	Neotoma (last access: 1 April 2021)	1106	1139	Hynes Brook Salt Marsh	48.6186	-58.965	0	North America	Peat	Raw	32	AWI	2	-50	3072	100.7	3122	Salt marsh in stream channel. Physiography: salt marsh. Surrounding vegetation: salt marsh.		Brookes, I.A., Scott, D.B. and McAndrews, J.H., 1985. Postglacial relative sea-level change, Port au Port area, west Newfoundland. Canadian Journal of Earth Sciences, 22(7), pp.1039-1047.	https://doi.org/10.1139/e85-107
IGARKA	IGARKA	IGARKA	10.21233/n3cs6n	Neotoma (last access: 1 April 2021)	1108	1141	Igarka Peat Exposure	67.6667	86	45	Asia	Peat	Raw	22	AWI	3	5655	11190	263.6	5535	Buried peat exposed in river terrace. Physiography: lower river valley. Surrounding vegetation: Picea obovata-Larix sibirica forest.		Anderson, P.M. and Lozhkin, A.V., 2002. Late Quaternary Vegetation and Climate of Siberia and the Russian Far East (Palynological and Radiocarbon Database). North East Science Center, Far East Branch, Russian Academy of Sciences, Magadan, Russia.		Il'ina, N.S., Lapshina, E.I. and Lavrenko, N.I., 1985. The vegetation cover of the western Siberia continental plateau. Nauka, Siberia Branch, Novosibirsk (in Russian).		Kats, S.V., 1953. History of vegetation of western Siberia during the Holocene. Bulletin of commission for study the Quaternary. Nauka, Moscow, 13, pp.118-123 (in Russian).		Levkovskaya, G.M., Kind, N.V., Zavel'skii, F.S. and Forova, V.S., 1970. Absolute age of peat from the Igarka region and Holocene zonal sequences of western Siberia. Bulletin of commission for study the Quaternary. Nauka, Moscow, 37, pp.94-101 (in Russian).		Orlova, V.V., 1962. Climate of the USSR: western Siberia. Gidrometizdat, Leningrad (in Russian).
IGLUTALK	IGLUTALK	IGLUTALK	10.21233/n3803n	Neotoma (last access: 1 April 2021)	1109	1142	Iglutalik Lake	66.135	-66.0833	90	North America	Lake	Raw	69	AWI	5	-66	10535	155.9	10601
Ilinka_Terrace	Ilinka_Terrace	ILINKA	10.21233/n30g8w	Neotoma (last access: 1 April 2021)	1111	1144	Il'inka Terrace	47.9667	142.167	3	Asia	Coast	Raw	4	AWI	3	646	2698	684	2052	Exposure in marine terrace. Physiography: river mouth on sea coast. Surrounding vegetation: meadows and bogs.	1987-08-14 00:00:00	Anderson, P.M. and Lozhkin, A.V., 2002. Late Quaternary Vegetation and Climate of Siberia and the Russian Far East (Palynological and Radiocarbon Database). North East Science Center, Far East Branch, Russian Academy of Sciences, Magadan, Russia.		Korotky, A., Grebennikova, T., Razjigaeva, N., Volkov, V., Mokhova, L., Ganzey, L. and Bazarova, V., 1997. Marine terraces of western Sakhalin Island. Catena, 30(1), pp.61-81.	https://doi.org/10.1016/S0341-8162(97)00002-7	Korotkiy, A.M., Pushkar, V.S., Grebennikova, T.A., Razzhigaeva, N.G., Karaulova, L.P., Mokhova, L.M., Ganzey, L.A., Cherepanova, M.N., Bazarova, V.B., Volkov, V.G. and Kovalyukh, N.N., 1997. Marine terraces and Quaternary history of the Sakhalin Shelf. Dal'nauka, Vladivostok (in Russian).
INDIAN	INDIAN	INDIAN	10.21233/tp4a-h605	Neotoma (last access: 1 April 2021)	1113	1147	Indian Lake	50.9167	-90.45	383	North America	Lake	Raw	28	AWI	5	6763	10478	137.6	3715	Large lake surrounded by glacial deposit. Physiography: thin commonly drumlinized till. Surrounding vegetation: black spruce/Jack pine/larch.	1981-08-01 00:00:00	Steventon, R.L. and Kutzbach, J.E., 1983. University of Wisconsin radiocarbon dates XX. Radiocarbon, 25(1), pp.152-168.	https://doi.org/10.1017/S0033822200005348	Bjorck, S., 1985. Deglaciation chronology and revegetation in northwestern Ontario. Canadian Journal of Earth Sciences, 22(6), pp.850-871.	https://doi.org/10.1139/e85-090
INDIANPF	INDIANPF	INDIANPF	10.21233/n36b0b	Neotoma (last access: 1 April 2021)	1114	1148	Indian Prairie Fen	44.6333	-122.575	988	North America	Peat	Raw	50	AWI	6	330	15822	316.2	15492	Fen in cirque valley. Physiography: Cascade Range. Surrounding vegetation: 2nd growth Pseudotsuga and Abies procera.	1992-01-01 00:00:00	Sea, D.S. and Whitlock, C., 1995. Postglacial vegetation and climate of the Cascade Range, central Oregon. Quaternary Research, 43(3), pp.370-381.	https://doi.org/10.1006/qres.1995.1043
INGLESBY	INGLESBY	INGLESBY	10.21233/n32m8w	Neotoma (last access: 1 April 2021)	1115	1149	Inglesby Lake	44.4833	-77.05	167	North America	Lake	Raw	28	AWI	7	-26	11641	432.1	11667	Marl-deposting lake of glacial origin.		Fritz, P., Morgan, A.V., Eicher, U. and McAndrews, J.H., 1987. Stable isotope, fossil Coleoptera and pollen stratigraphy in late Quaternary sediments from Ontario and New York State. Palaeogeography, Palaeoclimatology, Palaeoecology, 58(3-4), pp.183-202.	https://doi.org/10.1016/0031-0182(87)90059-9
IRONBOG	IRONBOG	IRONBOG	10.21233/n3704q	Neotoma (last access: 1 April 2021)	1118	1152	Keystone Iron Fen	38.865	-107.033	2920	North America	Peat	Raw	31	AWI	5	24.5	9258	307.8	9233.5	Iron oxide acid fen. Physiography: small basin behind moraine along creek. Surrounding vegetation: Carex, Sphagnum, Eriophorum, Betula glandulosa.		Fall, P.L., 1988. Vegetation dynamics in the southern Rocky Mountains: late Pleistocene and Holocene timberline fluctuations. Doctoral dissertation. University of Arizona, Tucson, Arizona, USA.		Fall, P.L., 1985. Holocene dynamics of the subalpine forest in central Colorado. American Association of Stratigraphic Palynologists Contribution Series, 16, pp.31-46.		Fall, P., 1997. Fire history and composition of the subalpine forest of western Colorado during the Holocene. Journal of Biogeography, 24(3), pp.309-325.	https://doi.org/10.1046/j.1365-2699.1997.00094.x
IRVIN	IRVIN	IRVIN	10.21233/n3392t	Neotoma (last access: 1 April 2021)	1119	1153	Irvin Lake	47.1356	-93.6436	478	North America	Lake	Raw	51	Neotoma_Neotoma 1	7	-30	13641	273.4	13671	Kettle lake. Physiography: Sugar Hills area, rough rolling topo. Surrounding vegetation: Alnus, Fraxinus, Betula, Thuja, Abies.	1980-12-01 00:00:00	Alwin, B.C., 1982. Vegetation history of the Sugar Hills area, Itasca Co., Minnesota. Master's thesis. University of Minnesota, Minneapolis, Minnesota, USA.
ITAPEVA	ITAPEVA	ITAPEVA	10.21233/n3jm87	Neotoma (last access: 1 April 2021)	1120	1154	Morro de Itapeva	-22.7833	-45.5333	1850	South America	Peat	Raw	43	AWI	9	-51	39597	944	39648	Peat bog. Physiography: small basin,next to the steep escarpment. Surrounding vegetation: Araucaria forest and campos.	1993-08-01 00:00:00	Behling, H., 1997. Late Quaternary vegetation, climate and fire history from the tropical mountain region of Morro de Itapeva, SE Brazil. Palaeogeography, Palaeoclimatology, Palaeoecology, 129(3-4), pp.407-422.	https://doi.org/10.1016/S0031-0182(97)88177-1
IVAN3	IVAN3	IVAN3	10.21233/n3dt69	Neotoma (last access: 1 April 2021)	1121	1155	Ivanovskoye Peat Bog	56.8167	38.7667	141	Europe	Peat	Raw	33	AWI	9	113	8334	256.9	8221	Peat bog. Physiography: periglacial lake of middle Pleistocene. Surrounding vegetation: birch-pine forest and Carex assosiations.	1986-01-01 00:00:00
Izylmetevskaya	Izylmetevskaya	IZYLEMET	10.21233/n3942z	Neotoma (last access: 1 April 2021)	1122	1156	Izylmet'evskaya Terrace Exposure 3410	48.8167	141.967	4	Asia	Coast	Raw	15	AWI	5	3015	4817	128.7	1802	Exposure in marine terrace. Physiography: coastal plain. Surrounding vegetation: Larix forest with bogs.	1987-09-06 00:00:00	Anderson, P.M. and Lozhkin, A.V., 2002. Late Quaternary Vegetation and Climate of Siberia and the Russian Far East (Palynological and Radiocarbon Database). North East Science Center, Far East Branch, Russian Academy of Sciences, Magadan, Russia.		Korotky, A., Grebennikova, T., Razjigaeva, N., Volkov, V., Mokhova, L., Ganzey, L. and Bazarova, V., 1997. Marine terraces of western Sakhalin Island. Catena, 30(1), pp.61-81.	https://doi.org/10.1016/S0341-8162(97)00002-7	Korotkiy, A.M., Pushkar, V.S., Grebennikova, T.A., Razzhigaeva, N.G., Karaulova, L.P., Mokhova, L.M., Ganzey, L.A., Cherepanova, M.N., Bazarova, V.B., Volkov, V.G. and Kovalyukh, N.N., 1997. Marine terraces and Quaternary history of the Sakhalin Shelf. Dal'nauka, Vladivostok (in Russian).
JACKLAKE	JACKLAKE	JACKLAKE	10.21233/n35b01	Neotoma (last access: 1 April 2021)	1123	1157	Jack Lake	47.3167	-81.7667	430	North America	Lake	Raw	47	AWI	3	-34	12754	278	12788	Small lake on sandy till. Physiography: rolling Canadian Shield uplands. Surrounding vegetation: Betula/Abies/Picea/Populus/Pinus/Acer.		Liu, K.B. and Lam, N.S.N., 1985. Paleovegetational reconstruction based on modern and fossil pollen data: an application of discriminant analysis. Annals of the Association of American Geographers, 75(1), pp.115-130.	https://doi.org/10.1111/j.1467-8306.1985.tb00062.x	Liu, K.B., 1990. Holocene paleoecology of the boreal forest and Great Lakes-St. Lawrence forest in northern Ontario. Ecological Monographs, 60(2), pp.179-212.	https://doi.org/10.2307/1943044
JACKLOND	JACKLOND	JACKLOND	10.21233/n31m8k	Neotoma (last access: 1 April 2021)	1124	1158	Jack London Lake	62.0723	149.54	820	Asia	Lake	Raw	60	AWI	5	208	17872	299.4	17664	Morainally dammed lake. Physiography: glacial topography in mountains. Surrounding vegetation: larch forest.	1989-07-01 00:00:00	Lozhkin, A.V., Anderson, P.M., Eisner, W.R., Ravako, L.G., Hopkins, D.M., Brubaker, L.B., Colinvaux, P.A. and Miller, M.C., 1993. Late Quaternary lacustrine pollen records from southwestern Beringia. Quaternary Research, 39(3), pp.314-324.	https://doi.org/10.1006/qres.1993.1038
JACKSON_neotoma	JACKSON_neotoma	JACKSON	10.21233/n3634f	Neotoma (last access: 1 April 2021)	1125	1160	Jackson Pond	37.4325	-85.7246	260	North America	Lake	Raw	58	AWI	6	-34	26113	458.7	26147	Pond is a circular, shallow sinkhole (3.5 ha) in a karst up-land of gentle relief. Hillcrests are 10-15 m above the surface of the basin. Most of the surrounding area is in cropland or pasture, with scattered woodlots of Quercus and Carya spp. Fagus grandifolia, Fraxinus americana, Acer saccharum, and other mesic species occur in valley bottoms. The basin itself at the time of coring was vegetate…	1983-01-01 00:00:00	Wilkins, G.R., 1985. Late-Quaternary Vegetational History at Jackson Pond Larue County, Kentucky. Master's thesis. The University of Tennessee, Knoxville, Tennessee, USA.		Wilkins, G.R., Delcourt, P.A., Delcourt, H.R., Harrison, F.W. and Turner, M.R., 1991. Paleoecology of central Kentucky since the last glacial maximum. Quaternary Research, 36(2), pp.224-239.	https://doi.org/10.1016/0033-5894(91)90027-3
Wrangle_Island_JackLondonLake	JACKW	JACKW	10.21233/n3290r	Neotoma (last access: 1 April 2021)	1126	1161	Jack London Lake	70.8942	179.624	7	Asia	Lake	Raw	20	AWI	6	321	15024	773.8	14703	Shallow lake on coastal plain. Surrounding vegetation: Cyperaceae-Poaceae tundra.		Anderson, P.M. and Lozhkin, A.V., 2002. Late Quaternary Vegetation and Climate of Siberia and the Russian Far East (Palynological and Radiocarbon Database). North East Science Center, Far East Branch, Russian Academy of Sciences, Magadan, Russia.		Lozhkin, A.V., Anderson, P.M., Vartanyan, S.L., Brown, T.A., Belaya, B.V. and Kotov, A.N., 2001. Late Quaternary paleoenvironments and modern pollen data from Wrangel Island (Northern Chukotka). Quaternary Science Reviews, 20(1-3), pp.217-233.	https://doi.org/10.1016/S0277-3791(00)00121-9
JACOB	JACOB	JACOB	10.21233/n3hm8x	Neotoma (last access: 1 April 2021)	1127	1162	Jacob Lake	34.3333	-110.833	2285	North America	Lake	Raw	20	AWI	3	-22	24586.5	1295.2	24608.5	Ephemeral lake/sinkhole in sandstone. Physiography: Mogollon Rim. Surrounding vegetation: ponderosa pine forest.	1981-02-21 00:00:00	Jacobs, B.F., 1983. Past vegetation and climate of the Mogollon Rim Area, Arizona. Doctoral dissertation. University of Arizona, Tucson, Arizona, USA.
JBL004	JBL004	JBL004	10.21233/n3bx4z	Neotoma (last access: 1 April 2021)	1136	1171	James Bay	50.22	-80.2	267	North America	Lake	Raw	25	AWI	3	-17	3257	136.4	3274
JEAN	JEAN	JEAN	10.21233/n31w6k	Neotoma (last access: 1 April 2021)	1219	1254	Saint-Jean Ile d'Orléans	46.9328	-70.9328	68	North America	Peat	Raw	24	AWI	4	93	11712	505.2	11619	Ombrotrophic bog, ericaceous, treed. Physiography: rock basin and clay veneer, plateau. Surrounding vegetation: Tilio - Aceretum sacchari.	1969-07-23 00:00:00	Richard, P.J.H., 1971. Two pollen diagrams from the Quebec City area, Canada. Pollen et Spores, 13, pp.523-559.		Richard, P.J.H., 1977. Histoire post-wisconsinienne de la vegetation du Quebec meridional par l'analyse pollinique. Service de la recherche, Direction generale des forets, Ministere des Terres et Forets du Quebec (in French).
JEWELL	JEWELL	JEWELL	10.21233/n3h72v	Neotoma (last access: 1 April 2021)	1220	1255	Jewell Site	42.26	-93.7	317	North America	Lake	Raw	55	AWI	7	1279	17529	300.9	16250	Drained lake. Physiography: Altamont Moraine, rolling. Surrounding vegetation: agricultural.	1985-07-01 00:00:00	Kim, H.K., 1986. Late-glacial and Holocene environment in central Iowa: a comparative study of pollen data from four sites. Doctoral dissertation. University of Iowa, Iowa City, Iowa, USA.
JOELAKE	JOELAKE	JOELAKE	10.21233/n39t6c	Neotoma (last access: 1 April 2021)	1355	1390	Joe Lake	66.7667	-157.217	183	North America	Lake	Raw	87	AWI	18	-49	50044	582.5	50093	Lake in glacial outwash. Physiography: rolling uplands. Surrounding vegetation: birch-alder shrub tundra.	1989-05-01 00:00:00	Anderson, P.M., 1988. Late Quaternary pollen records from the Kobuk and Noatak River drainages, northwestern Alaska. Quaternary Research, 29(3), pp.263-276.	https://doi.org/10.1016/0033-5894(88)90035-X	ACER project members; Sanchez Goñi, Maria Fernanda; Desprat, Stéphanie; Daniau, Anne-Laure; Anderson, Patricia M; Bartlein, Patrick J; Brubaker, Linda B (2017): CLAM age model and pollen profile of sediment core Joe_Lake. PANGAEA	https://doi.org/10.1594/PANGAEA.872870	Anderson, P.M., Bartlein, P.J. and Brubaker, L.B., 1994. Late Quaternary history of tundra vegetation in northwestern Alaska. Quaternary Research, 41(3), pp.306-315.	https://doi.org/10.1006/qres.1994.1035	Sánchez Goñi, M.F., Desprat, S., Daniau, A.L., Bassinot, F.C., Polanco-Martínez, J.M., Harrison, S.P., Allen, J.R., Anderson, R.S., Behling, H., Bonnefille, R. and Burjachs, F., 2017. The ACER pollen and charcoal database: a global resource to document vegetation and fire response to abrupt climate changes during the last glacial period. Earth System Science Data, 9(2), pp.679-695.	https://doi.org/10.5194/essd-9-679-2017
JOES3	JOES3	JOES3	10.21233/n3643d	Neotoma (last access: 1 April 2021)	1356	1391	Joes Pond	48.24	-58.24	100	North America	Lake	Raw	57	AWI	3	-19	16016	286.3	16035			Anderson, T. and Lewis, C.F., 1992. Climatic influences of deglacial drainage changes in southern Canada at 10 to 8 ka suggested by pollen evidence. Geographie physique et Quaternaire, 46(3), pp.255-272.	https://doi.org/10.7202/032913ar
JON	JON	JON	10.21233/n3bk9d	Neotoma (last access: 1 April 2021)	1358	1393	Tourbière du lac Joncas	47.2578	-71.1628	747	North America	Peat	Raw	48	AWI	2	49	9007	190.6	8958	Peat bog over kettle lake on valleyside. Physiography: hilly morainic landscape. Surrounding vegetation: Betulo papyriferaea - Abietetum.	1969-08-06 00:00:00	Richard, P.J.H., 1977. Histoire post-wisconsinienne de la vegetation du Quebec meridional par l'analyse pollinique. Service de la recherche, Direction generale des forets, Ministere des Terres et Forets du Quebec (in French).
JOS	JOS	JOS	10.21233/n36s63	Neotoma (last access: 1 April 2021)	1362	1397	Tourbière de Lanoraie JOSEPH	45.9919	-73.3028	18	North America	Peat	Raw	21	AWI	4	-63	6383	322.3	6446	Ombrotrophic bog, ericaceous cover. Physiography: dissected deltaic plain. Surrounding vegetation: Caryo - Aceretum sacchari.	1978-01-01 00:00:00	Comtois, P.G., 1979. Histoire holocene du climat et de la vegetation a Lanoraie. Master's thesis. Universite de Montreal, Quebec, Canada (in French).		Comtois, P., 1982. Histoire holocene du climat et de la vegetation a Lanoraie (Quebec). Canadian Journal of Earth Sciences, 19(10), pp.1938-1952 (in French).	https://doi.org/10.1139/e82-172
KAIYAK	KAIYAK	KAIYAK	10.21233/n38q7d	Neotoma (last access: 1 April 2021)	1396	1432	Kaiyak Lake	68.14	-161.44	190	North America	Lake	Raw	53	AWI	7	-65	43302	834	43367	Lake in glacial drift. Physiography: river terrace in broad mountain valley. Surrounding vegetation: birch-alder shrub tundra.	1979-04-01 00:00:00	Anderson, P.M., 1985. Late Quaternary vegetational change in the Kotzebue Sound area, northwestern Alaska. Quaternary Research, 24(3), pp.307-321.	https://doi.org/10.1016/0033-5894(85)90053-5
KALIST	KALIST	KALIST	10.21233/n3515t	Neotoma (last access: 1 April 2021)	1397	1433	Kalistratikha Exposure	53.3333	83.25	190	Asia	Alluvial/Fluvial	Raw	8	AWI	4	14084	39091	3572.4	25007	Exposure on 50 m terrace of the Ob River. Physiography: river valley. Surrounding vegetation: Betula-Pinus forest with Poaceae meadows.		Anderson, P.M. and Lozhkin, A.V., 2002. Late Quaternary Vegetation and Climate of Siberia and the Russian Far East (Palynological and Radiocarbon Database). North East Science Center, Far East Branch, Russian Academy of Sciences, Magadan, Russia.		Panychev, V.A. and Orlova, L.A., 1973. The radiocarbon age of Kalmanskoii suite of Biisko-Barnaul'skoii Depression. In: Pleistocene of Siberia and neighboring region ed. by V.N. Saks (pp.51-54). Nauka, Moscow (in Russian).		Zudin, A.N. and Votakh, M.R., 1977. The stratigraphy of Pliocene and Quaternary strata of Priobskogo Plateau. Nauka, Novosibirsk (in Russian).
KALSA	KALSA	KALSA	10.21233/n3173w	Neotoma (last access: 1 April 2021)	1398	1434	Kalsa Mire	58.1914	27.4115	38	Europe	Peat	Raw	69	AWI	13	-19	11612	171	11631	Mire, peat cutting at the edges. Physiography: undulating moraine topography. Surrounding vegetation: Pinus, Betula, Picea forest. in SW field.		Kimmel, K., Pirrus, R. and Raukas, A., 1999. Holocene deposits. In: Lake Peipsi: Geology ed. by A. Miidel and A. Raukas (pp.42-52). Sulemees Publishers, Tallinn.
KAMEN	KAMEN	KAMEN	10.21233/n39h00	Neotoma (last access: 1 April 2021)	1399	1435	Kameničky	49.7265	15.9709	624	Europe	Peat	Raw	29	AWI	8	-69	13644.5	489.8	13713.5	Drained sloping spring mire. Physiography: Kamenicska kotlina Basin at its N margin. Surrounding vegetation: Alder carr.	1976-01-01 00:00:00	Rybnickova, E. and Rybnicek, K., 1979. Syngenesis of Polygalo Nardetum strictae preissing. Progress report on MAB project, 91, pp.23-31.		Rybnickova, E. and Rybnicek, K., 1988. Holocene palaeovegetation and palaeoenvironment of the Kamenicska kotlina basin (Czechoslovakia). Folia geobotanica & phytotaxonomica, 23(3), pp.285-301.	https://doi.org/10.1007/BF02854824
KAN	KAN	KAN	10.21233/n3205j	Neotoma (last access: 1 April 2021)	1400	1437	Kanaaupscow	54.0278	-76.6439	200	North America	Lake	Raw	31	AWI	2	-62	8003	268.8	8065	Rock basin. Physiography: moraine over rolling bedrock. Surrounding vegetation: Cladino - Piceetum marianae.	1977-07-07 00:00:00	Richard, P.J.H., 1979. Contribution a l'histoire postglaciaire de la vegetation au nord-est de la Jamesie, Nouveau-Quebec. Geographie physique et Quaternaire, 33(1), pp.93-112 (in French).	https://doi.org/10.7202/1000324ar
KANSJON	KANSJON	KANSJON	10.21233/n3h737	Neotoma (last access: 1 April 2021)	1401	1438	Kansjön	57.6405	14.5346	308	Europe	Lake	Raw	45	AWI	12	39	15589	353.4	15550	Lake. Physiography: Rolling till surface. Surrounding vegetation: Pinus, Betula.	1988-01-01 00:00:00
KARASYE	KARASYE	KARASYE	10.21233/n3cj0z	Neotoma (last access: 1 April 2021)	1402	1439	Karasye Lake	53.03	70.22	435	Asia	Lake	Raw	38	AWI	7	-37	6204	168.7	6241	Tectonic lake with outlet. Physiography: Kokchetav massif, low granite hills. Surrounding vegetation: pine forest.	1990-01-01 00:00:00	Tarasov, P.E., Harrison, S.P., Saarse, L., Pushenko, M.Y., Andreev, A.A., Aleshinskaya, Z.V., Davydova, N.N., Dorofeyuk, N.I., Efremov, Y.V., Khomutova, V.I., Sevastyanov, D.V., Tamosaitis, J., Uspenskaya, O.N., Yakushko, O.F. and Tarasova, I.V., 1994. Lake status records from the former Soviet Union and Mongolia: data base documentation. Paleoclimatology Publications Series 2, World Data Center-…		Kremenetski, C., Tarasov, P. and Cherkinsky, A., 1997. Postglacial development of Kazakhstan pine forests. Geographie physique et Quaternaire, 51(3), pp.391-404.	https://doi.org/10.7202/033138ar	Tarasov, P.E. and Kremenetskii, K.V., 1995. Geochronology and stratigraphy of the Holocene lacustrine-bog deposits in northern and central Kazakhstan. Stratigraphy and Geological Correlation, 3(1), pp.73-80.
KARDAS	KARDAS	KARDAS	10.21233/n37t6r	Neotoma (last access: 1 April 2021)	1403	1440	Kardashinski Swamp	46.5167	32.6167	4	Europe	Peat	Raw	38	AWI	14	195	9073	239.9	8878	Phragmites fen. Physiography: Floodplain of Dniepr River. Vegetation formation: Steppe.	1988-06-01 00:00:00	Kremenetski, C.V., 1995. Holocene vegetation and climate history of southwestern Ukraine. Review of Palaeobotany and Palynology, 85(3-4), pp.289-301.	https://doi.org/10.1016/0034-6667(94)00123-2
KARGA	KARGA	KARGA	10.21233/n34144	Neotoma (last access: 1 April 2021)	1404	1441	Karginskii Cape Peat Exposure	70	85	60	Asia	Peat	Raw	19	AWI	13	1160	9026	437	7866	Peat exposure in river bluff. Physiography: river valley. Surrounding vegetation: Pinus sylvestris-P. sibirica-tree Betula.		Anderson, P.M. and Lozhkin, A.V., 2002. Late Quaternary Vegetation and Climate of Siberia and the Russian Far East (Palynological and Radiocarbon Database). North East Science Center, Far East Branch, Russian Academy of Sciences, Magadan, Russia.		Firsov, L.V., Levina, T.P. and Troitskii, S.L., 1972. The Holocene climatic changes in northern Siberia. In: Climatic changes in arctic areas during the last ten thousand years ed. by V. Vasari, H. Hyvarinen, and S. Hicks (pp.341-349). Acta Universitatis Onlensis. Section A., Scientitae Rerum Naturalium Number 3, Geologica Number 3. University of Oula, Oula.		Kind, N.V., 1969. Late glacial and post-glacial times in Siberia (new data about absolute geochronology). In: Holocene ed. by M.I. Neishtadt (pp.195-202). Nauka, Moscow (in Russian).		Levina, T.P. and Nikitin, V.P., 1973. Paleobotanical characteristics of Holocene peat in the Karginskii Cape region of the Yenisei River. In: The Pleistocene of Siberia and bordering oblasts ed. by V.N. Saks (pp.80-85). Nauka, Moscow (in Russian).
KARGOPOL	KARGOPOL	KARGOPOL	10.21233/n30b1v	Neotoma (last access: 1 April 2021)	1405	1442	Kargopolovo Exposure	55	83	75	Asia	Alluvial/Fluvial	Raw	16	AWI	4	77	7233	477.1	7156	Exposure in floodplain terrace. Physiography: river valley. Surrounding vegetation: Poaceae-Cyperaceae.		Anderson, P.M. and Lozhkin, A.V., 2002. Late Quaternary Vegetation and Climate of Siberia and the Russian Far East (Palynological and Radiocarbon Database). North East Science Center, Far East Branch, Russian Academy of Sciences, Magadan, Russia.		Arkhipov, S.A. and Votakh, M.R., 1973. History of the vegetation during the middle and late Wurm and the Holocene in the upper Ob valley. In: The Pleistocene of Siberia and neighboring regions ed. by V.N. Saks (pp.130-143). Nauka, Moscow (in Russian).
KATANTI	KATANTI	KATANTI	10.21233/n38h12	Neotoma (last access: 1 April 2021)	1406	1443	Katantica	-14.8	-69.1833	4820	South America	Peat	Raw	21	AWI	3	-1	8510	425.6	8511			Graf, K., 1992. Pollendiagramme aus den Anden: Eine Synthese zur Klimageschichte und Vegetationsentwicklung seit der letzten Eiszeit. Physische Geographie 34. Universitat Zurich-Irchel, Geographisches Institut, Zurich, Switzerland (in German).
KAYAKSK	KAYAKSK	KAYAKSK	10.21233/n34p7t	Neotoma (last access: 1 April 2021)	1407	1444	Kayakskoye Zaimitschye	55	81	150	Asia	Peat	Raw	31	AWI	5	604	7220	220.5	6616	Peat from exposure. Physiography: lower river valley. Surrounding vegetation: Betula-Pinus forest.		Anderson, P.M. and Lozhkin, A.V., 2002. Late Quaternary Vegetation and Climate of Siberia and the Russian Far East (Palynological and Radiocarbon Database). North East Science Center, Far East Branch, Russian Academy of Sciences, Magadan, Russia.		Levina, T.P., Orlova, L.A., Panychev, V.A. and Ponomareva, E.A., 1987. Radiochronometry and pollen stratigraphy of Holocene peat of Kayakskoye Zaimitschye (Barabinskaya forest-steppe). In: Regional Geochronology of Siberia and Far East ed. by I.V. Nikolayeva (pp.136-143). Nauka, Novosibirsk (in Russian).
KEELE	KEELE	KEELE	10.21233/n3106m	Neotoma (last access: 1 April 2021)	1408	1445	Keele Lake	64.16	-127.6	1150	North America	Lake	Raw	51	AWI	6	-49	13757	276.1	13806	Lake dammed by Mountain River moraine. Physiography: Mackenzie Mountains. Surrounding vegetation: tundra/scattered Picea glauca.	1990-04-01 00:00:00	Szeicz, J.M., MacDonald, G.M. and Duk-Rodkin, A., 1995. Late Quaternary vegetation history of the central Mackenzie Mountains, Northwest Territories, Canada. Palaeogeography, Palaeoclimatology, Palaeoecology, 113(2-4), pp.351-371.	https://doi.org/10.1016/0031-0182(95)00070-3
KELLHOL1	KELLHOL1	KELLHOL1	10.21233/n3bj0n	Neotoma (last access: 1 April 2021)	1410	1447	Kellys Hollow	45.3	-90.35	470	North America	Peat	Raw	21	AWI	4	-49	11052	555	11101	Wet-mesic woodland bog. Physiography: end moraine of Woodfordian drift. Surrounding vegetation: Acer/Betula/Picea/Pinus strobus.	1978-08-01 00:00:00	Bender, M.M., Baerreis, D.A., Bryson, R.A. and Steventon, R.L., 1981. University of Wisconsin radiocarbon dates XVIII. Radiocarbon, 23(1), pp.145-161.	https://doi.org/10.1017/S0033822200037504	Heide, K.M., 1981. Late Quaternary vegetational history of north-central Wisconsin, U.S.A.: estimating forest composition from pollen data. Doctoral dissertation. Brown University, Providence, Rhode Island, USA.		Heide, K., 1984. Holocene pollen stratigraphy from a lake and small hollow in north-central Wisconsin, USA. Palynology, 8(1), pp.3-19.	https://doi.org/10.1080/01916122.1984.9989268
KELLNERS	KELLNERS	KELLNERS	10.21233/n36t7t	Neotoma (last access: 1 April 2021)	1411	1448	Kellners Lake	44.24	-87.85	261	North America	Lake	Raw	69	AWI	4	-28.5	16996	250.4	17024.5	Kettle lake. Physiography: Valders glacial drift. Surrounding vegetation: cultivated, conifer-hardwood forest.		Bender, M.M., Bryson, R.A. and Baerreis, D.A., 1978. University of Wisconsin radiocarbon dates XV. Radiocarbon, 20(1), pp.157-167.	https://doi.org/10.1017/S0033822200003970	Goodwin, R.G., 1976. Vegetation response to the Two Rivers Till Advance based on a pollen diagram from Kellners Lake, Manitowoc County, Wisconsin. Master's thesis. Geology and Geophysics, University of Wisconsin, Madison, Wisconsin, USA.
KENOGAMI	KENOGAMI	KENOGAMI	10.21233/n3c929	Neotoma (last access: 1 April 2021)	1414	1451	Lac Kénogami	48.32	-71.39	166	North America	Lake	Raw	31	AWI	2	84	8458	279.1	8374	Peat bog over a kettle lake. Physiography: fluvioglacial in a dissected plain. Surrounding vegetation: Aceri rubrae - Abietetum.	1969-07-30 00:00:00	Richard, P.J.H., 1973. Histoire postglaciaire comparee de la vegetation dans deux localites au nord du Parc des Laurentides, Quebec. Naturaliste Canadien, 100, pp.591-603 (in French).		Richard, P.J.H., 1977. Histoire post-wisconsinienne de la vegetation du Quebec meridional par l'analyse pollinique. Service de la recherche, Direction generale des forets, Ministere des Terres et Forets du Quebec (in French).
KIRCHNR1	KIRCHNR1	KIRCHNR1	10.21233/n39b21	Neotoma (last access: 1 April 2021)	1483	1520	Kirchner Marsh	44.7709	-93.1226	286	North America	Peat	Raw	96	AWI	5	132	13019	135.7	12887	Marsh on St. Croix Moraine. Physiography: ice block depression in hilly terrain. Surrounding vegetation: white/red/and bur oak.	1959-11-01 00:00:00	Wright Jr, H.E., Winter, T.C. and Patten, H.L., 1963. Two pollen diagrams from southeastern Minnesota: problems in the regional late-glacial and postglacial vegetational history. Geological Society of America Bulletin, 74(11), pp.1371-1396.	https://doi.org/10.1130/0016-7606(1963)74[1371:TPDFSM]2.0.CO;2	Winter, T.C., 1961. A pollen analysis of Kirchner Marsh, Dakota County, Minnesota. Master's thesis. University of Minnesota, Minneapolis, Minnesota, USA.
KIRIKU	KIRIKU	KIRIKU	10.21233/n31t78	Neotoma (last access: 1 April 2021)	1484	1522	Kirikumae	57.6829	27.2513	183	Europe	Lake	Raw	89	AWI	12	1108	16576	175.8	15468	Lake, west + southern part paludified. Physiography: Hummocky moraine, esker. Surrounding vegetation: Pinus and Picea forest + mire.	1988-07-01 00:00:00	Saarse, L. and Rajamae, R., 1997. Holocene vegetation and climatic change on the Haanja Heights, SE Estonia. Proceedings of the Estonian Academy of Science, Geology, 46, pp.75-92.
KIRK	KIRK	KIRK	10.21233/n3b07s	Neotoma (last access: 1 April 2021)	1485	1523	Kirk Lake	48.24	-121.62	190	North America	Lake	Raw	84	AWI	9	-22	14031	169.3	14053	Small lake. Physiography: North Cascade range mountains.	1980-10-01 00:00:00	Cwynar, L.C., 1987. Fire and the forest history of the North Cascade Range. Ecology, 68(4), pp.791-802.	https://doi.org/10.2307/1938350
KITCHNER	KITCHNER	KITCHNER	10.21233/n36633	Neotoma (last access: 1 April 2021)	1486	1524	Kitchner Lake	45.6667	-87.455	237	North America	Lake	Raw	31	AWI	4	-13	12817	427.7	12830		1981-03-17 00:00:00	Woods, K.D. and Davis, M.B., 1989. Paleoecology of range limits: beech in the upper peninsula of Michigan. Ecology, 70(3), pp.681-696.	https://doi.org/10.2307/1940219
KOLLIOKS	KOLLIOKS	KOLLIOKS	10.21233/n3805d	Neotoma (last access: 1 April 2021)	1503	1541	Kollioksak	66.98	-156.46	213	North America	Lake	Raw	47	AWI	4	1662	17332	340.7	15670	Morainally dammed lake. Physiography: mountain valley. Surrounding vegetation: birch shrub tundra/spruce forest.	1985-08-01 00:00:00
KOLYMA	KOLYMA	KOLYMA	10.21233/n3493h	Neotoma (last access: 1 April 2021)	1504	1542	Berelyekh River	63.2833	147.75	800	Asia	Alluvial/Fluvial	Raw	19	AWI	4	931	21708	1154.3	20777	Peat and alluvium,glacio-fluvial terrace. Physiography: river valley in mountains. Surrounding vegetation: Larix dahurica forest.		Anderson, P.M. and Lozhkin, A.V., 2002. Late Quaternary Vegetation and Climate of Siberia and the Russian Far East (Palynological and Radiocarbon Database). North East Science Center, Far East Branch, Russian Academy of Sciences, Magadan, Russia.		Lozhkin, A.V. and Postolenko, G.A., 1989. New data about the environmental evolution of the mountain region of the Kolyma region during the late Anthropogene. Doklady Akademii Nauk, 307(5), pp.1184-1188 (in Russian).
KOMARIT	KOMARIT	KOMARIT	10.21233/n30h06	Neotoma (last access: 1 April 2021)	1505	1543	Komaritsa Peat Exposure	57.5	69	42	Asia	Peat	Raw	28	AWI	10	103	10553	387	10450	Buried peat exposed in river terrace. Physiography: river valley. Surrounding vegetation: Pinus-Picea-Abies.		Anderson, P.M. and Lozhkin, A.V., 2002. Late Quaternary Vegetation and Climate of Siberia and the Russian Far East (Palynological and Radiocarbon Database). North East Science Center, Far East Branch, Russian Academy of Sciences, Magadan, Russia.		Khotinskiy, N.A., 1977. Holocene of northern Eurasia. Nauka, Moscow (in Russian).		Neishtadt, M.I., 1967. About the absolute age of bogs of western Siberia. Revue Roumaine de Biologic Ser Botanique, 12, pp.1981-1986.		Volkov, I.A., Gurtovaya, E.E. and Firsov, L.V., 1973. The structure, age and history of Holocene peat near Gorno-Slinkino village on the Irtysh River. In: The Pleistocene of Siberia and neighboring regions ed. by V.N. Saks (pp.55-68). Nauka, Moscow (in Russian).		Volkova, V.S., 1966. The Quaternary deposits of the lower Irtysh River and their biostratigraphic characteristics. Nauka, Novosibirsk (in Russian).
KOTYRKOL	KOTYRKOL	KOTYRKOL	10.21233/n3734r	Neotoma (last access: 1 April 2021)	1511	1549	Kotyrkol' Peat Bog	52.9622	70.3804	439	Asia	Peat	Raw	21	AWI	8	-68	3919	199.3	3987	Betula/Populus/Carex swamp.	1989-01-01 00:00:00	Tarasov, P.E., 1992. Holocene palaeogeography of the steppe zone of northern and central Kazakhstan. Doctoral dissertation. Moscow State University, Moscow, Russia (in Russian).		Tarasov, P.E., 1991. The features of the late Holocene for the Kokchetav Highland. Vestnik Moskovskogo Universiteta, Ser. 5, Geography, 6, pp.54-60 (in Russian).		Tarasov, P.E. and Kremenetskii, K.V., 1995. Geochronology and stratigraphy of the Holocene lacustrine-bog deposits in northern and central Kazakhstan. Stratigraphy and Geological Correlation, 3(1), pp.73-80.
KREST	KREST	KREST	10.21233/n3jm9m	Neotoma (last access: 1 April 2021)	1513	1551	Kresta Gulf Exposure	66	-179	5	Asia	Peat	Raw	10	AWI	2	2845	10083	804.2	7238	Coastal exposure of peat and sand. Physiography: coastal lowland. Surrounding vegetation: Cyperaceae tundra.		Anderson, P.M. and Lozhkin, A.V., 2002. Late Quaternary Vegetation and Climate of Siberia and the Russian Far East (Palynological and Radiocarbon Database). North East Science Center, Far East Branch, Russian Academy of Sciences, Magadan, Russia.		Ivanov, V.F., 1986. Quaternary deposits of the coast of eastern Chukotka. North East Interdisciplinary Research Institute, Far East Branch, USSR Academy of Sciences, Vladivostok (in Russian).
KUBAGA	KUBAGA	KUBAGA	10.21233/n3943b	Neotoma (last access: 1 April 2021)	1515	1553	Bol'shaya Kuobakh-Baga River, Terrace Site	64.9833	143.375	500	Asia	Alluvial/Fluvial	Raw	11	AWI	6	1252	6837	558.5	5585	Exposure along river terrace. Physiography: river valley in mountains. Surrounding vegetation: Larix-Populus-Chosenia forest.		Anderson, P.M. and Lozhkin, A.V., 2002. Late Quaternary Vegetation and Climate of Siberia and the Russian Far East (Palynological and Radiocarbon Database). North East Science Center, Far East Branch, Russian Academy of Sciences, Magadan, Russia.
KURO11	KURO11	KURO11	10.21233/n3hm99	Neotoma (last access: 1 April 2021)	1521	1559	East Siberian Sea Coast 11	71.0667	156.25	8	Asia	Alluvial/Fluvial	Raw	9	AWI	4	4299	9573	659.2	5274	10-m-high alas exposure. Physiography: yedoma-alas relief. Surrounding vegetation: Salix-graminoid tundra.		Anderson, P.M. and Lozhkin, A.V., 2002. Late Quaternary Vegetation and Climate of Siberia and the Russian Far East (Palynological and Radiocarbon Database). North East Science Center, Far East Branch, Russian Academy of Sciences, Magadan, Russia.		Lozhkin, A.V., Prokhorova, T.P. and Parii, V.P., 2014. Radiocarbon dates and palynological characteristics of sediments of the alas complex of the Kolyma Lowland. Doklady Akademii Nauk, 224(6), 1395-1398 (in Russian).
KUROP7	KUROP7	KUROP7	10.21233/n34f14	Neotoma (last access: 1 April 2021)	1524	1562	Bol'shaya Kuropatoch'ya River (KUROP7)	70.6667	156.75	7	Asia	Alluvial/Fluvial	Raw	7	AWI	3	343	7277	1155.7	6934	Silt and peat exposed in river cutbank. Physiography: coastal lowland. Surrounding vegetation: Betula-Salix-herb tundra.		Anderson, P.M. and Lozhkin, A.V., 2002. Late Quaternary Vegetation and Climate of Siberia and the Russian Far East (Palynological and Radiocarbon Database). North East Science Center, Far East Branch, Russian Academy of Sciences, Magadan, Russia.
KURPEAT	KURPEAT	KURPEAT	10.21233/n30n0k	Neotoma (last access: 1 April 2021)	1525	1563	Bol'shaya Kuropatoch'ya River (KURPEAT)	69.9667	156.375	47	Asia	Peat	Raw	10	AWI	4	7108	12602	610.4	5494	Exposed buried peat in alas sediments. Physiography: yedoma-alas relief. Surrounding vegetation: Betula-Salix-graminoid tundra.	1972-01-01 00:00:00	Anderson, P.M. and Lozhkin, A.V., 2002. Late Quaternary Vegetation and Climate of Siberia and the Russian Far East (Palynological and Radiocarbon Database). North East Science Center, Far East Branch, Russian Academy of Sciences, Magadan, Russia.		Lozhkin, A.V. and Vazhenina., L.N., 1987. The characteristics of vegetational development from the Kolyma lowland in the early Holocene. In: Quaternary period of northeast Asia ed. by V.P. Pokhialainen (pp.135-144). North East Interdisciplinary Research Institute, Far East Branch, USSR Academy of Sciences, Magadan (in Russian).
KYLENLK	KYLENLK	KYLENLK	10.21233/n38w6r	Neotoma (last access: 1 April 2021)	1526	1564	Kylen Lake	47.34	-91.81	485	North America	Lake	Raw	40	AWI	9	9214	19321	259.2	10107			Birks, H.J.B., 1981. Late Wisconsin vegetational and climatic history at Kylen Lake, northeastern Minnesota. Quaternary Research, 16(3), pp.322-355.	https://doi.org/10.1016/0033-5894(81)90015-6
Kyurbe-Yuryakh-2	Kyurbe-Yuryakh-2	KYURBE2	10.21233/n31d1v	Neotoma (last access: 1 April 2021)	1528	1566	Kyurbe-Yuryakh-2	68.5986	138.617	650	Asia	Alluvial/Fluvial	Raw	4	AWI	4	2699	9346	2215.7	6647	Exposure in river terrace. Physiography: river valley. Surrounding vegetation: open Larix forest.		Anderson, P.M. and Lozhkin, A.V., 2002. Late Quaternary Vegetation and Climate of Siberia and the Russian Far East (Palynological and Radiocarbon Database). North East Science Center, Far East Branch, Russian Academy of Sciences, Magadan, Russia.
LACAWAC	LACAWAC	LACAWAC	10.21233/n3bx5b	Neotoma (last access: 1 April 2021)	1530	1568	Lacawac	41.3822	-75.2913	443	North America	Lake	Raw	29	AWI	12	-33	706	26.4	739		1984-01-01 00:00:00	Russell, E.W., Davis, R.B., Anderson, R.S., Rhodes, T.E. and Anderson, D.S., 1993. Recent centuries of vegetational change in the glaciated north-eastern United States. Journal of Ecology, 81(4), pp.647-664.	https://doi.org/10.2307/2261663
LACCOLIN	LACCOLIN	LACCOLIN	10.21233/n37744	Neotoma (last access: 1 April 2021)	1531	1569	Lac Colin	46.72	-70.29	658	North America	Lake	Raw	45	AWI	8	80	13165	297.4	13085			Mott, R.J., 1977. Late-Pleistocene and Holocene palynology in southeastern Quebec. Geographie physique et Quaternaire, 31(1-2), pp.139-149.	https://doi.org/10.7202/1000060ar
LACLOUIS	LACLOUIS	LACLOUIS	10.21233/n3ck8b	Neotoma (last access: 1 April 2021)	1533	1571	Lac Louis	47.28	-79.11	300	North America	Lake	Raw	56	AWI	3	82	10502	189.5	10420			McAndrews, J.H., 1981. Late Quaternary climate of Ontario: temperature trends from the fossil pollen record. In: Quaternary paleoclimate ed. by W.C. Mahaney (pp.319-333). Geo Abstracts, Ltd., University of East Anglia, Norwich, United Kingdom.		Vincent, J.S., 1973. A palynological study for the Little Clay Belt, northwestern Quebec. Naturaliste Canadien, 100, pp.59-70.
LACMAGIE	LACMAGIE	LACMAGIE	10.21233/n37w7t	Neotoma (last access: 1 April 2021)	1534	1572	Lac à Magie	44.27	-66.08	60	North America	Lake	Raw	43	AWI	4	10262	14260	95.2	3998	Small lake with steep sloping sides. Physiography: broad rolling lowland, Appalachian Prov. Surrounding vegetation: Rubus, Myrica, Acer, Larix, Betula, Pice.		Mayle, F.E., Levesque, A.J. and Cwynar, L.C., 1993. Accelerator-mass-spectrometer ages for the Younger Dryas event in Atlantic Canada. Quaternary Research, 39(3), pp.355-360.	https://doi.org/10.1006/qres.1993.1042	Mayle, F.E. and Cwynar, L.C., 1995. A review of multi-proxy data for the Younger Dryas in Atlantic Canada. Quaternary Science Reviews, 14(9), pp.813-821.	https://doi.org/10.1016/0277-3791(95)00063-1	Mayle, F.E. and Cwynar, L.C., 1995. Impact of the Younger Dryas cooling event upon lowland vegetation of Maritime Canada. Ecological Monographs, 65(2), pp.129-154.	https://doi.org/10.2307/2937135
LADDLAKE	LADDLAKE	LADDLAKE	10.21233/n30d2x	Neotoma (last access: 1 April 2021)	1535	1574	Ladd Lake	41.42	-84.76	249	North America	Lake	Raw	59	AWI	6	-49	18669	322.7	18718	Kettle lake. Physiography: Fort Wayne moraine proglacial lake plain. Surrounding vegetation: willow and elm on margin.	1986-11-13 00:00:00	Shane, L.C., 1991. Vegetation history of western Ohio. Final Report on 1990 Grant from the Ohio Department of Natural Resources, Limnological Research Center, University of Minnesota, Minneapolis, Minnesota.		Shane, L.C. and Anderson, K.H., 1993. Intensity, gradients and reversals in late glacial environmental change in east-central North America. Quaternary Science Reviews, 12(5), pp.307-320.	https://doi.org/10.1016/0277-3791(93)90039-O
LAGOAJO	LAGOAJO	LAGOAJO	10.21233/n3673f	Neotoma (last access: 1 April 2021)	1537	1577	Lago de Ajo	43.0417	-6.13878	1570	Europe	Lake	Raw	77	AWI	7	-6	25212	331.8	25218	Lake dammed in 1915 for hydroelectric. Physiography: On limestone at the head of the valley. Surrounding vegetation: Pasture, Quercus scrub, Fagus woodland.	1981-06-01 00:00:00	Allen, J.R., Huntley, B. and Watts, W.A., 1996. The vegetation and climate of northwest Iberia over the last 14,000 years. Journal of Quaternary Science, 11(2), pp.125-147.	https://doi.org/10.1002/(SICI)1099-1417(199603/04)11:2<125::AID-JQS232>3.0.CO;2-U	McKeever, M.H., 1984. Comparative palynological studies of two lake sites in western Ireland and northwestern Spain. Master's thesis. Trinity College, Dublin, Ireland.
LAGOMOR1	LAGOMOR1	LAGOMOR1	10.21233/hxd2-5546	Neotoma (last access: 1 April 2021)	1538	1578	Lago Moreno	-41.0583	-71.5167	800	South America	Lake	Raw	37	AWI	3	1923	16486.5	404.5	14563.5	Small lake near Lago Nahuel Huapi. Physiography: glaciated region of southern Andes. Surrounding vegetation: Nothofagus dombeyi/Austrocedrus forest.	1980-01-01 00:00:00	Valencio, D.A., Sinito, A.M., Creer, K.M., Mazzoni, M.M., Alonso, M.S. and Markgraf, V., 1985. Paleomagnetism, Sedimentology, Radiocarbon Age Determinations and Palynology of the Llao--Llao Area, Southwestern Argentina (lat. 41S, long. 7130'W): Paleolimnological aspects. Quaternary of South America and Antarctic Peninsula, 3, pp.109-147.
LAGSAL	LAGSAL	LAGSAL	10.21233/n3bp82	Neotoma (last access: 1 April 2021)	1539	1579	Laguna Salinas	-16.4	-71.15	4300	South America	Peat	Raw	9	AWI	2	-65	17866	2241.4	17931	Peat bog at lake border. Physiography: high andean basin, surrounded by volcano. Surrounding vegetation: puna steppe.
LAKE16	LAKE16	LAKE16	10.21233/n36w7h	Neotoma (last access: 1 April 2021)	1540	1580	Lake Sixteen	45.59	-84.32	216	North America	Lake	Raw	36	AWI	5	2306	13475	319.1	11169	Small lake in peatland. Physiography: low relief with sand ridges. Surrounding vegetation: Pinus/Quercus/Betula/Populus.		Futyma, R.P. and Miller, N.G., 1986. Stratigraphy and genesis of the Lake Sixteen peatland, northern Michigan. Canadian Journal of Botany, 64(12), pp.3008-3019.	https://doi.org/10.1139/b86-398
LAKE27	LAKE27	LAKE27	10.21233/n33635	Neotoma (last access: 1 April 2021)	1541	1581	Lake 27	45.05	-84.79	411	North America	Lake	Raw	24	AWI	3	112	3466	145.8	3354			Bernabo, J.C., 1981. Quantitative estimates of temperature changes over the last 2700 years in Michigan based on pollen data. Quaternary Research, 15(2), pp.143-159.	https://doi.org/10.1016/0033-5894(81)90101-0
LAKE31	LAKE31	LAKE31	10.21233/v98s-4073	Neotoma (last access: 1 April 2021)	1542	1582	Lake 31	67.05	-50.4667	115	North America	Lake	Raw	32	AWI	4	656.5	5779	165.2	5122.5	Lake in former braided meltwater system. Physiography: glacialfluvial valley. Surrounding vegetation: shrub tundra and xerophyllous grassland.	1985-01-01 00:00:00	Eisner, W.R., Tornqvist, T.E., Koster, E.A., Bennike, O. and van Leeuwen, J.F., 1995. Paleoecological studies of a Holocene lacustrine record from the Kangerlussuaq (Sondre Stromfjord) region of West Greenland. Quaternary Research, 43(1), pp.55-66.	https://doi.org/10.1006/qres.1995.1006
LAKEBN7	LAKEBN7	LAKEBN7	10.21233/n31h9x	Neotoma (last access: 1 April 2021)	1547	1587	Lake BN7	55.0092	-73.5167	395	North America	Lake	Raw	27	AWI	4	-31	7492	289.3	7523	Shallow lake, streamflow in and out. Physiography: Canadian shield, low relief. Surrounding vegetation: open lichen woodland.		Gajewski, K., 1991. Representation pollinique actuelle a la limite des arbres au Nouveau-Quebec. Canadian Journal of Earth Sciences, 28(4), pp.643-648 (in French).	https://doi.org/10.1139/e91-055	Gajewski, K., Garralla, S. and Milot-Roy, V., 1996. Postglacial Vegetation at the Northern Limit of Lichen Woodland in Northwestern Quebec/La vegetation postglaciaire a la limite septentrionale de la pessiere a lichens du nord-ouest du Quebec. Geographie physique et Quaternaire, 50(3), pp.341-350 (in French).	https://doi.org/10.7202/033104ar
LAKECH2	LAKECH2	LAKECH2	10.21233/n32647	Neotoma (last access: 1 April 2021)	1549	1590	Lake CH2	49.6833	-74.5833	830	North America	Lake	Raw	96	AWI	6	-64	8673	92	8737	Small lake. Physiography: Canadian Shield. Surrounding vegetation: boreal forest.	1989-04-01 00:00:00	Garralla, S., 1991. L'analyse pollinique des sediments d'un lac de la region de Chibougamau, Quebec. Master's thesis. Universite Laval, Sainte-Foy, Quebec, Canada.		Garralla, S. and Gajewski, K., 1992. Holocene vegetation history of the boreal forest near Chibougamau, central Quebec. Canadian Journal of Botany, 70(7), pp.1364-1368.	https://doi.org/10.1139/b92-171
LAKEEC1	LAKEEC1	LAKEEC1	10.21233/n3hj06	Neotoma (last access: 1 April 2021)	1550	1591	Lake EC1	56.2833	-75.1	250	North America	Lake	Raw	34	AWI	4	-61	6910	211.2	6971	Small lake.		Gajewski, K., Payette, S. and Ritchie, J.C., 1993. Holocene vegetation history at the boreal-forest--shrub-tundra transition in north-western Quebec. Journal of Ecology, 81, pp.433-443.	https://doi.org/10.2307/2261522
LAKEEC2	LAKEEC2	LAKEEC2	10.21233/n3cq8q	Neotoma (last access: 1 April 2021)	1551	1592	Lake EC2	56.0246	-74.9465	300	North America	Lake	Raw	42	AWI	4	61	6727	162.6	6666	Small lake. Physiography: Canadian shield. Surrounding vegetation: open black spruce-lichen woodland.		Gajewski, K., 1991. Representation pollinique actuelle a la limite des arbres au Nouveau-Quebec. Canadian Journal of Earth Sciences, 28(4), pp.643-648 (in French).	https://doi.org/10.1139/e91-055	Gajewski, K., Garralla, S. and Milot-Roy, V., 1996. Postglacial Vegetation at the Northern Limit of Lichen Woodland in Northwestern Quebec/La vegetation postglaciaire a la limite septentrionale de la pessiere a lichens du nord-ouest du Quebec. Geographie physique et Quaternaire, 50(3), pp.341-350 (in French).	https://doi.org/10.7202/033104ar
LAKEGB1	LAKEGB1	LAKEGB1	10.21233/n34746	Neotoma (last access: 1 April 2021)	1553	1594	Lake GB1	55.1108	-75.2489	325	North America	Lake	Raw	23	AWI	3	-4.5	6348	288.8	6352.5	Small lake on top of hill. Physiography: Canadian shield. Surrounding vegetation: open lichen woodland, burned in 1940s.		Gajewski, K., 1991. Representation pollinique actuelle a la limite des arbres au Nouveau-Quebec. Canadian Journal of Earth Sciences, 28(4), pp.643-648 (in French).	https://doi.org/10.1139/e91-055	Gajewski, K., Garralla, S. and Milot-Roy, V., 1996. Postglacial Vegetation at the Northern Limit of Lichen Woodland in Northwestern Quebec/La vegetation postglaciaire a la limite septentrionale de la pessiere a lichens du nord-ouest du Quebec. Geographie physique et Quaternaire, 50(3), pp.341-350 (in French).	https://doi.org/10.7202/033104ar
LAKEGB2	LAKEGB2	LAKEGB2	10.21233/n30h9m	Neotoma (last access: 1 April 2021)	1554	1595	Lake GB2	56.1	-75.2833	300	North America	Lake	Raw	58	AWI	4	-62	6977	123.5	7039	Small lake.		Gajewski, K., Payette, S. and Ritchie, J.C., 1993. Holocene vegetation history at the boreal-forest--shrub-tundra transition in north-western Quebec. Journal of Ecology, 81, pp.433-443.	https://doi.org/10.2307/2261522
LAKELB1	LAKELB1	LAKELB1	10.21233/n3164x	Neotoma (last access: 1 April 2021)	1556	1598	Lake LB1	57.9167	-75.6167	200	North America	Lake	Raw	30	AWI	4	-65	7233	251.7	7298	Small lake.		Gajewski, K., Payette, S. and Ritchie, J.C., 1993. Holocene vegetation history at the boreal-forest--shrub-tundra transition in north-western Quebec. Journal of Ecology, 81, pp.433-443.	https://doi.org/10.2307/2261522
LAKELR1	LAKELR1	LAKELR1	10.21233/n3gh9z	Neotoma (last access: 1 April 2021)	1557	1599	Lake LR1	58.5833	-75.25	170	North America	Lake	Raw	21	AWI	4	1	7530	376.4	7529	Small lake.		Gajewski, K., Payette, S. and Ritchie, J.C., 1993. Holocene vegetation history at the boreal-forest--shrub-tundra transition in north-western Quebec. Journal of Ecology, 81, pp.433-443.	https://doi.org/10.2307/2261522
LAKELR3	LAKELR3	LAKELR3	10.21233/n3715f	Neotoma (last access: 1 April 2021)	1558	1601	Lake LR3	58.5783	-75.245	160	North America	Lake	Raw	18	AWI	3	-67	6513	387.1	6580	Lake. Physiography: Hudson Bay Lowland. Surrounding vegetation: shrub tundra, 20 km north of treeline.	1989-01-01 00:00:00	Gajewski, K. and Garralla, S., 1992. Holocene vegetation histories from three sites in the tundra of northwestern Quebec, Canada. Arctic and Alpine Research, 24(4), pp.329-336.	https://doi.org/10.1080/00040851.1992.12002965
LAKELT1	LAKELT1	LAKELT1	10.21233/n3ch2c	Neotoma (last access: 1 April 2021)	1559	1603	Lake LT1	58.1417	-75.15	150	North America	Lake	Raw	15	AWI	4	-62	7017	505.6	7079	Lake. Physiography: Hudson Bay Lowland. Surrounding vegetation: shrub tundra, 90 km north of treeline.	1988-01-01 00:00:00	Gajewski, K. and Garralla, S., 1992. Holocene vegetation histories from three sites in the tundra of northwestern Quebec, Canada. Arctic and Alpine Research, 24(4), pp.329-336.	https://doi.org/10.1080/00040851.1992.12002965
LAKEPWWL	LAKEPWWL	LAKEPWWL	10.21233/n37p9h	Neotoma (last access: 1 April 2021)	1560	1604	Lake PWWL	73.5914	-98.5389	110	North America	Lake	Raw	11	AWI	5	20.5	10343.5	1032.3	10323	Small lake. Surrounding vegetation: tundra, abun Saxifraga oppositifolia.	1995-07-10 00:00:00	Gajewski, K. and Frappier, M., 2001. A Holocene lacustrine record of environmental change in northeastern Prince of Wales Island, Nunavut, Canada. Boreas, 30(4), pp.285-289.	https://doi.org/10.1111/j.1502-3885.2001.tb01047.x
LAKEQC	LAKEQC	LAKEQC	10.21233/n3064m	Neotoma (last access: 1 April 2021)	1561	1606	Lake QC	46.8283	-80.6983	333	North America	Lake	Raw	28	AWI	3	-48	11461	426.3	11509			McAndrews, J.H. and Campbell, I.D., 1993. 6 ka mean July temperature in eastern Canada from Bartlein and Webb's (1985) pollen transfer functions: comments and illustrations. In: Proxy climate data and models of the six thousand years before present time interval: the Canadian perspective. Canadian Global Change Program Incidental Report Series IR93-3 ed. by A. Telka (pp.22-25). The Royal Society …
LAKESIX	LAKESIX	LAKESIX	10.21233/n3fj0k	Neotoma (last access: 1 April 2021)	1562	1607	Lake Six	48.4	-81.3167	305	North America	Lake	Raw	39	AWI	3	-29	10279	271.3	10308	Possibly kettle lake. Physiography: clay belt lowlands. Surrounding vegetation: Pinus/Populus/Picea.		Liu, K.B., 1990. Holocene paleoecology of the boreal forest and Great Lakes-St. Lawrence forest in northern Ontario. Ecological Monographs, 60(2), pp.179-212.	https://doi.org/10.2307/1943044
LAMISION	LAMISION	LAMISION	10.21233/n36154	Neotoma (last access: 1 April 2021)	1565	1610	La Mision	-53.5	-67.8333	5	South America	Peat	Raw	63	AWI	5	-65	11057	179.4	11122	Marsh around lagune in creek valley. Physiography: unglaciated Tertiary landforms. Surrounding vegetation: steppe.	1975-02-01 00:00:00	Markgraf, V., 1983. Late and postglacial vegetational and paleoclimatic changes in subantarctic, temperate, and arid environments in Argentina. Palynology, 7(1), pp.43-70.	https://doi.org/10.1080/01916122.1983.9989252	Markgraf, V., 1993. Paleoenvironments and paleoclimates in Tierra del Fuego and southernmost Patagonia, South America. Palaeogeography, Palaeoclimatology, Palaeoecology, 102(1-2), pp.53-68.	https://doi.org/10.1016/0031-0182(93)90005-4	Markgraf, V., 1980. New data on the late- and postglacial history of La Mision, Tierra del Fuego, Argentina. Proceedings IV International Palynological Conference, 3, pp.68-74.		Markgraf, V., 1980. Nuevos datos para la historia vegetacional del Tardiglacial y Postglacial de "La Mision" Tierra del Fuego. Memorias del 3er. Coloquio de Paleobotanica y Palinologia. Instituto Nacional de Antropologia. Mexico, DF, Mexico, 86, pp.75-81.
LAN17	LAN17	LAN17	10.21233/n32b1g	Neotoma (last access: 1 April 2021)	1566	1611	L'Anse aux Meadows Site	51.5733	-55.55	5	North America	Peat	Raw	74	AWI	4	19	2386	32.4	2367	Small slope fen. Physiography: low relief marine terrace. Surrounding vegetation: Sphagnum/Betula/Larix/Myrica.	1976-01-01 00:00:00	Davis, A.M., McAndrews, J.H. and Wallace, B.L., 1988. Paleoenvironment and the archaeological record at the L'Anse aux Meadows Site, Newfoundland. Geoarchaeology, 3(1), pp.53-64 (in French).	https://doi.org/10.1002/gea.3340030104
LANSTJE	LANSTJE	LANSTJE	10.21233/n33067	Neotoma (last access: 1 April 2021)	1569	1615	Tourbière de Lanoraie STJEAN	46	-73.2169	20	North America	Peat	Raw	43	AWI	4	-68	5990	144.2	6058	Ombrotrophic bog, ericaceous. Physiography: dissected deltaic plain. Surrounding vegetation: Tilio-Aceretum sacchari.	1977-01-01 00:00:00	Comtois, P.G., 1979. Histoire holocene du climat et de la vegetation a Lanoraie. Master's thesis. Universite de Montreal, Quebec, Canada.		Comtois, P., 1982. Histoire holocene du climat et de la vegetation a Lanoraie (Quebec). Canadian Journal of Earth Sciences, 19(10), pp.1938-1952 (in French).	https://doi.org/10.1139/e82-172
LATPOND	LATPOND	LATPOND	10.21233/n3jb1t	Neotoma (last access: 1 April 2021)	1571	1617	Lateral Pond	65.9422	-135.514	470	North America	Lake	Raw	105	AWI	5	-26	20474	197.1	20500	Lake between lateral moraine ridges. Physiography: valley moraine in Richardson Mountains. Surrounding vegetation: black Spruce, Sphagnum.	1978-01-01 00:00:00	Ritchie, J.C., 1982. The modern and late-Quaternary vegetation of the Doll Creek area, north Yukon, Canada. New Phytologist, 90(3), pp.563-603.		Ritchie, J.C. and Cwynar, L.C., 1982. The Late Quaternary Vegetation of the North Yukon. In: Paleoecology of Beringia ed. by D.M. Hopkins, J.V. Matthews, Jr., C.E. Schweger, and S.B. Young (pp.113-126). Academic Press, New York, USA.
LDOPIRES	LDOPIRES	LDOPIRES	10.21233/n31b2j	Neotoma (last access: 1 April 2021)	1575	1621	Lago do Pires	-17.9479	-42.2115	390	South America	Lake	Raw	77	AWI	6	-52	11122	147	11174	Natural lake surrounded by small mounten. Physiography: foothill area. Surrounding vegetation: farm land.	1993-08-01 00:00:00	Behling, H., 1995. A high resolution Holocene pollen record from Lago do Pires, SE Brazil: vegetation, climate and fire history. Journal of Paleolimnology, 14(3), pp.253-268.	https://doi.org/10.1007/BF00682427
LEADINGT	LEADINGT	LEADINGT	10.21233/n39h1c	Neotoma (last access: 1 April 2021)	1576	1622	Leading Tickles	49.4713	-55.473	105	North America	Lake	Raw	43	AWI	5	-44	14009	334.6	14053	Rock basin lake. Physiography: bedrock hills with till veneer. Surrounding vegetation: second-growth forest, much Alnus.	1982-07-14 00:00:00	Anderson, T.W. and Macpherson, J.B., 1994. Wisconsinan Late-glacial environmental change in Newfoundland: A regional review. Journal of Quaternary Science, 9(2), pp.171-178.	https://doi.org/10.1002/jqs.3390090213	Blake Jr, W., 1983. Geological Survey of Canada radiocarbon dates XXIII. Geological Survey of Canada Paper 83(7), P.5.		Macpherson, J.B. and Anderson, T.W., 1985. Further evidence of late glacial climate fluctuations from Newfoundland: pollen stratigraphy from a core from a north coast site. Current Research, Part B, Geological Survey of Canada Paper, 85(1B), pp.383-390.		McNeely, R. and McCuaig, S., 1991. Geological Survey of Canada radiocarbon dates XXIX. Geological Survey of Canada Paper, 89(7), pp.11-12.
LEDOBOZ	LEDOBOZ	LEDOBOZ	10.21233/n35s8j	Neotoma (last access: 1 April 2021)	1577	1623	Ledovyi Obryu Exposure, Southern Section	64.1	171.183	44	Asia	Lake	Raw	9	AWI	7	9997	20081	1260.5	10084	Lake sediments in yedoma exposure. Physiography: mountain valley. Surrounding vegetation: Larix forest-tundra.		Anderson, P.M. and Lozhkin, A.V., 2002. Late Quaternary Vegetation and Climate of Siberia and the Russian Far East (Palynological and Radiocarbon Database). North East Science Center, Far East Branch, Russian Academy of Sciences, Magadan, Russia.		Dort-Gol'ts, Y.E., 1982. Characteristic form of late Pleistocene yedoma complex in southeastern Chukotka. In: Frozen geological processes and paleography of the lowlands of northeast Asia (pp.75-81). Magadan Publishing House, Magadan (in Russian).		Kaplin, P.A., 1980. Recent deposits and Pleistocene paleogeography of Chukotka. Nauka, Moscow (in Russian).		Kotov, A.N., Lozhkin, A.V. and Ryabchun, V.K., 1989. Glacial facies and conditions of sediment forms for upper Quaternary sediments of the Main River valley, Chukotka. In: Form relief and sediment correlation and precious metals of north east USSR ed. by V.F. Ivanov and B.F. Palymskii (pp.117-131). North East Interdisciplinary Research Institute, Far East Branch, USSR Academy of Sciences, Magadan…		Kotov, A.N. and Ryabchun, V.K., 1986. Cryogenic complex of late Pleistocene deposits of the Main River Valley. In: Ust'-Algan mammoth exposures ed. by A.V. Lozhkin. North East Interdisciplinary Research Institute, Far East Branch, USSR Academy of Sciences, Magadan (in Russian).		Lozhkin, A.V., Kotov, A.N. and Ryabchun, V.K., 2000. Palynological and radiocarbon data of the Ledovyi Obryv exposure (the south east of Chukotka). In: The Quaternary Period of Beringia ed .by K.V. Simakov (pp.118-131). North East Interdisciplinary Research Institute, Far East Branch, Russian Academy of Sciences, Magadan (in Russian).
LEO	LEO	LEO	10.21233/n3cm92	Neotoma (last access: 1 April 2021)	1579	1626	Lac à Léonard	49.21	-65.81	17	North America	Lake	Raw	31	AWI	5	481	10857	345.9	10376	Kettle pond with marginal marshes. Physiography: flat fluvio-marine, deep valley bottom. Surrounding vegetation: Betulo-Aceratum sacchari.	1979-06-13 00:00:00	Labelle, C. and Richard, P.J.H., 1984. Histoire postglaciaire de la vegetation dans la region de Mont-Saint-Pierre, Gaspesie, Quebec. Geographie physique et Quaternaire, 38(3), pp.257-274 (in French).	https://doi.org/10.7202/032567ar
Lesnoye_Lake	Lesnoye_Lake	LESNOYE	10.21233/n3443s	Neotoma (last access: 1 April 2021)	1581	1628	Lesnoye Lake	59.5833	151.867	95	Asia	Lake	Raw	39	AWI	7	-57	19464	513.7	19521	Lake in tectonic depression. Physiography: coastal tectonic depression. Surrounding vegetation: Larix dahurica muskeg.	1993-07-01 00:00:00	Anderson, P.M. and Lozhkin, A.V., 2002. Late Quaternary Vegetation and Climate of Siberia and the Russian Far East (Palynological and Radiocarbon Database). North East Science Center, Far East Branch, Russian Academy of Sciences, Magadan, Russia.		Anderson, P.M., Belaya, B.V., Glushkova, O.Y. and Lozhkin, A.V., 1997. New data about the vegetation history of northern Priokhot'ye during the Late Pleistocene and Holocene. In: Late Pleistocene and Holocene of Beringia ed. by M.K. Gagiev (pp.33-54). North East Interdisciplinary Research Institute, Far East Branch, Russian Academy of Sciences, Magadan (in Russian).
LGEORGE	LGEORGE	LGEORGE	10.21233/n38k9s	Neotoma (last access: 1 April 2021)	1583	1630	Lake George	-35.0897	149.429	673	Indopacific	Lake	Raw	42	AWI	20	-68	39651	968.8	39719	Closed Tectonic basin. Physiography: Hilly, scarp 200m high on western shore. Surrounding vegetation: Eucalypt woodland, grasslands.	1970-04-01 00:00:00	Singh, G., Opdyke, N.D. and Bowler, J.M., 1981. Late Cainozoic stratigraphy, palaeomagnetic chronology and vegetational history from Lake George, NSW. Journal of the Geological Society of Australia, 28(3-4), pp.435-452.	https://doi.org/10.1080/00167618108729180	Singh, G. and Geissler, E.A., 1985. Late Cainozoic history of vegetation, fire, lake levels and climate, at Lake George, New South Wales, Australia. Philosophical Transactions of the Royal Society of London. Series B, Biological Sciences, 311(1151), pp.379-447.
LHUATACO	LHUATACO	LHUATACO	10.21233/n34s87	Neotoma (last access: 1 April 2021)	1584	1631	Laguna Huatacocha	-10.7836	-76.5946	4500	South America	Lake	Raw	37	AWI	3	-21	11914	331.5	11935	Lake on glacial moraine. Physiography: intermontane valley in W. cordillera. Surrounding vegetation: ichu grass.		Hansen, B.C., Wright Jr, H.E. and Bradbury, J.P., 1984. Pollen studies in the Junin area, central Peruvian Andes. Geological Society of America Bulletin, 95(12), pp.1454-1465.	https://doi.org/10.1130/0016-7606(1984)95<1454:PSITJA>2.0.CO;2
LILYAK	LILYAK	LILYAK	10.21233/n31358	Neotoma (last access: 1 April 2021)	1585	1632	Lily Lake	59.2	-135.39	230	North America	Lake	Raw	62	AWI	14	-12	12560	206.1	12572	Headwaters lake between two low hills. Physiography: Chilkat Peninsula. Surrounding vegetation: Picea sitchensis, Tsuga heterophylla.		Cwynar, L.C., 1990. A late quaternary vegetation history from Lily Lake, Chilkat Peninsula, southeast Alaska. Canadian Journal of Botany, 68(5), pp.1106-1112.	https://doi.org/10.1139/b90-139
LILYLAKE	LILYLAKE	LILYLAKE	10.21233/n3gf17	Neotoma (last access: 1 April 2021)	1586	1633	Lily Lake	45.0482	-92.8239	258	North America	Lake	Raw	30	AWI	7	-39	14886	514.7	14925		1978-01-01 00:00:00	Brugam, R.B., Grimm, E.C. and Eyster-Smith, N.M., 1988. Holocene environmental changes in Lily Lake, Minnesota inferred from fossil diatom and pollen assemblages. Quaternary Research, 30(1), pp.53-66.	https://doi.org/10.1016/0033-5894(88)90087-7
LILYLK	LILYLK	LILYLK	10.21233/n36x6g	Neotoma (last access: 1 April 2021)	1587	1635	Lily Lake	43.77	-110.33	2469	North America	Lake	Raw	31	AWI	3	-53	9224	309.2	9277	Kettle Lake with marginal fen. Physiography: stagnation moraine. Surrounding vegetation: Pinus contorta, P. albicaulis, Pic, Abi.	1986-08-01 00:00:00	Steventon, R.L. and Kutzbach, J.E., 1988. University of Wisconsin radiocarbon dates XXV. Radiocarbon, 30(3), pp.367-383.	https://doi.org/10.1017/S0033822200044416	Whitlock, C., 1993. Postglacial vegetation and climate of Grand Teton and southern Yellowstone National Parks. Ecological Monographs, 63(2), pp.173-198.	https://doi.org/10.2307/2937179	Whitlock, C. and Bartlein, P.J., 1993. Spatial variations of Holocene climatic change in the Yellowstone region. Quaternary Research, 39(2), pp.231-238.	https://doi.org/10.1006/qres.1993.1026
LILYLKFN	LILYLKFN	LILYLKFN	10.21233/n3c93p	Neotoma (last access: 1 April 2021)	1588	1637	Lily Lake Fen	43.7667	-110.317	2469	North America	Peat	Raw	31	AWI	6	7217	15152	264.5	7935	Marginal fen along a kettle lake. Physiography: stagnation moraine. Surrounding vegetation: Pinus contorta, P. albicaulis, Pic, Abi.	1985-08-01 00:00:00	Steventon, R.L. and Kutzbach, J.E., 1987. University of Wisconsin radiocarbon dates XXIV. Radiocarbon, 29(3), pp.397-415.	https://doi.org/10.1017/S0033822200043794
LITTBASS	LITTBASS	LITTBASS	10.21233/n37m0d	Neotoma (last access: 1 April 2021)	1590	1639	Little Bass Lake	47.286	-93.6005	391	North America	Lake	Raw	37	AWI	6	10	12002	333.1	11992	Kettle lake in mixed coniferous-deciduous forest on sandy outwash deposited by St Louis sub-lobe of Des Moines lobe.	1977-12-01 00:00:00
LITTLEOR	Little_Lake	LITTLEOR	10.21233/n3ff1x	Neotoma (last access: 1 April 2021)	1592	1642	Little Lake	44.1666	-123.584	217	North America	Lake	Raw	65	AWI	12	211	44363	689.9	44152	Fen margin on landslide dammed lake. Physiography: Coast Range. Surrounding vegetation: second growth Pseudotsuga forest.	1991-01-01 00:00:00	Worona, M.A. and Whitlock, C., 1995. Late quaternary vegetation and climate history near Little Lake, central Coast Range, Oregon. Geological Society of America Bulletin, 107(7), pp.867-876.	https://doi.org/10.1130/0016-7606(1995)107<0867:LQVACH>2.3.CO;2
LJERONIM	LJERONIM	LJERONIM	10.21233/n3bd21	Neotoma (last access: 1 April 2021)	1595	1646	Laguna Jeronimo	-11.7833	-75.2167	4450	South America	Peat	Raw	40	AWI	3	-58	12736	328.1	12794	Moraine dammed lake. Physiography: Eastern Cordillera of the Andes. Surrounding vegetation: Ichu grass.		Hansen, B.C., Seltzer, G.O. and Wright Jr, H.E., 1994. Late Quaternary vegetational change in the central Peruvian Andes. Palaeogeography, Palaeoclimatology, Palaeoecology, 109(2-4), pp.263-285.	https://doi.org/10.1016/0031-0182(94)90179-1
LJUNIN1	LJUNIN1	LJUNIN1	10.21233/cpgt-b026	Neotoma (last access: 1 April 2021)	1596	1647	Laguna Junín	-11	-76.1667	4100	South America	Lake	Raw	77	AWI	8	1243	49269	631.9	48026	Large moraine and outwash dammed lake. Physiography: Junin Plain between E and W cordilleras. Surrounding vegetation: Ichu grass.		Hansen, B.C., Wright Jr, H.E. and Bradbury, J.P., 1984. Pollen studies in the Junin area, central Peruvian Andes. Geological Society of America Bulletin, 95(12), pp.1454-1465.	https://doi.org/10.1130/0016-7606(1984)95<1454:PSITJA>2.0.CO;2
LKANNIE	LKANNIE	LKANNIE	10.21233/n32w78	Neotoma (last access: 1 April 2021)	1597	1648	Lake Annie	27.2073	-81.3509	34	North America	Lake	Raw	73	AWI	7	-54	51585	717.2	51639	Sinkhole lake on the Lake Wales Ridge. Located at the Archbold Biological Stattion. Upland vegetation Southern Ridge Sandhill, slash pine (Pinus elliottii)/wiregrass variant; Sand Pine Scrub, dominated by Pinus clausa, Quercus spp., and Lyonia; Oak Hickory Scrub (Carya floridana, Quercus spp.), and Rosemary Scrub (Ceratiola ericoides). Bayhead vegetation occurs south of the lake.	1970-01-01 00:00:00	Watts, W.A., 1975. A late Quaternary record of vegetation from Lake Annie, south-central Florida. Geology, 3(6), pp.344-346.	https://doi.org/10.1130/0091-7613(1975)3<344:ALQROV>2.0.CO;2
LKHOPE	LKHOPE	LKHOPE	10.21233/n3df07	Neotoma (last access: 1 April 2021)	1599	1650	Lake Hope Simpson	52.4472	-56.431	295	North America	Lake	Raw	51	AWI	6	158	12231	241.5	12073			Engstrom, D.R. and Hansen, B.C.S., 1985. Postglacial vegetational change and soil development in southeastern Labrador as inferred from pollen and chemical stratigraphy. Canadian Journal of Botany, 63(3), pp.543-561.	https://doi.org/10.1139/b85-070
LLAKE	LLAKE	LLAKE	10.21233/n38q8s	Neotoma (last access: 1 April 2021)	1600	1651	Little Lake	44.6682	-63.9366	40	North America	Lake	Raw	39	AWI	5	10749	17150	168.4	6401	Small pond surrounded by steep banks. Physiography: broad rolling lowland, Appalachian Prov. Surrounding vegetation: Sphagnum, P. mariana, P. glauca, Larix.		Levesque, A.J., Mayle, F.E., Walker, I.R. and Cwynar, L.C., 1993. A previously unrecognized late-glacial cold event in eastern North America. Nature, 361(6413), pp.623-626.	https://doi.org/10.1038/361623a0	Mayle, F.E., Levesque, A.J. and Cwynar, L.C., 1993. Accelerator-mass-spectrometer ages for the Younger Dryas event in Atlantic Canada. Quaternary Research, 39(3), pp.355-360.	https://doi.org/10.1006/qres.1993.1042	Mayle, F.E. and Cwynar, L.C., 1995. A review of multi-proxy data for the Younger Dryas in Atlantic Canada. Quaternary Science Reviews, 14(9), pp.813-821.	https://doi.org/10.1016/0277-3791(95)00063-1	Mayle, F.E. and Cwynar, L.C., 1995. Impact of the Younger Dryas cooling event upon lowland vegetation of Maritime Canada. Ecological Monographs, 65(2), pp.129-154.	https://doi.org/10.2307/2937135
LMILLOC	LMILLOC	LMILLOC	10.21233/n39d2q	Neotoma (last access: 1 April 2021)	1603	1654	Laguna Milloc	-11.5775	-76.3565	4325	South America	Lake	Raw	16	AWI	3	251	13979	915.2	13728			Graf, K., 1992. Pollendiagramme aus den Anden: Eine Synthese zur Klimageschichte und Vegetationsentwicklung seit der letzten Eiszeit. Physische Geographie 34. Universitat Zurich-Irchel, Geographisches Institut, Zurich, Switzerland (in German).
LOCKPORT	LOCKPORT	LOCKPORT	10.21233/n35m0s	Neotoma (last access: 1 April 2021)	1604	1655	Lockport Gulf Section	43.1667	-78.7167	109	North America	Peat	Raw	15	AWI	4	8693	13042	310.6	4349	Ancient L. Ontario spillway channel.		Miller, R.F. and Morgan, A.V., 1982. A postglacial coleopterous assemblage from Lockport Gulf, New York. Quaternary Research, 17(2), pp.258-274.	https://doi.org/10.1016/0033-5894(82)90062-X
LOFTY	LOFTY	LOFTY	10.21233/n31w7z	Neotoma (last access: 1 April 2021)	1605	1656	Lofty Lake	54.7253	-112.481	620	North America	Lake	Raw	62	AWI	6	-16	13437	220.5	13453	Kettle lake. Physiography: gently rolling moraine. Surrounding vegetation: Populus, Betula, Picea, Pinus.		Lichti-Federovich, S., 1970. The pollen stratigraphy of a dated section of Late Pleistocene lake sediment from central Alberta. Canadian Journal of Earth Sciences, 7(3), pp.938-945.	https://doi.org/10.1139/e70-089
LONEFOX	LONEFOX	LONEFOX	10.21233/n3h74m	Neotoma (last access: 1 April 2021)	1606	1657	Lone Fox Lake	56.7167	-119.717	1100	North America	Lake	Raw	37	AWI	6	-30	12259	341.4	12289	Lake in ground morainal depression. Physiography: ground moraine in Clear Hills. Surrounding vegetation: Picea mariana, P. glauca, Pinus contorta.	1982-04-14 00:00:00	MacDonald, G.M., 1984. Postglacial plant migration and vegetation development in the western Canadian boreal forest. Doctoral dissertation. University of Toronto, Toronto, Ontario, Canada.		MacDonald, G.M., 1987. Postglacial development of the subalpine-boreal transition forest of western Canada. Journal of Ecology, 75, pp.303-320.	https://doi.org/10.2307/2260420	MacDonald, G.M. and Cwynar, L.C., 1985. A fossil pollen based reconstruction of the late Quaternary history of lodgepole pine (Pinus contorta ssp. latifolia) in the western interior of Canada. Canadian Journal of Forest Research, 15(6), pp.1039-1044.	https://doi.org/10.1139/x85-168	MacDonald, G.M. and Cwynar, L.C., 1991. Post-glacial population growth rates of Pinus contorta ssp. latifolia in western Canada. The Journal of Ecology, 79(2), pp.417-429.	https://doi.org/10.2307/2260723
LONESOME	LONESOME	LONESOME	10.21233/n3cf2p	Neotoma (last access: 1 April 2021)	1607	1658	Lonesome Lake	44.14	-71.7011	831	North America	Lake	Raw	19	AWI	5	449	12141	649.6	11692	Lake. Physiography: White Mountains. Surrounding vegetation: spruce-fir.	1977-07-01 00:00:00	Davis, M.B., Spear, R.W. and Shane, L.C., 1980. Holocene climate of New England. Quaternary Research, 14(2), pp.240-250.	https://doi.org/10.1016/0033-5894(80)90051-4	Spear, R.W., Davis, M.B. and Shane, L.C., 1994. Late Quaternary history of low-and mid-elevation vegetation in the White Mountains of New Hampshire. Ecological Monographs, 64(1), pp.85-109.	https://doi.org/10.2307/2937056
LONG	LONG	LONG	10.21233/n37q9v	Neotoma (last access: 1 April 2021)	1608	1659	Long Lake (CA:Nunavut)	62.6	-101.24	259	North America	Lake	Raw	32	AWI	2	103	6337	201.1	6234	Bank of small pond. Physiography: rolling topography. Surrounding vegetation: low shrub-sedge tundra.	1975-07-01 00:00:00	Bender, M.M., Bryson, R.A. and Baerreis, D.A., 1978. University of Wisconsin radiocarbon dates XV. Radiocarbon, 20(1), pp.157-167.	https://doi.org/10.1017/S0033822200003970	Kay, P.A., 1979. Multivariate statistical estimates of Holocene vegetation and climate change, forest-tundra transition zone, NWT, Canada. Quaternary Research, 11(1), pp.125-140.	https://doi.org/10.1016/0033-5894(79)90073-5
LONGSWMP	LONGSWMP	LONGSWMP	10.21233/n3073k	Neotoma (last access: 1 April 2021)	1610	1661	Longswamp	40.4909	-75.6697	192	North America	Lake	Raw	52	AWI	5	-54	15081	296.8	15135			Watts, W.A., 1979. Late Quaternary vegetation of central Appalachia and the New Jersey coastal plain. Ecological Monographs, 49(4), pp.427-469.	https://doi.org/10.2307/1942471
LOONPOND	LOONPOND	LOONPOND	10.21233/n34p86	Neotoma (last access: 1 April 2021)	1611	1663	Loon Pond	45.04	-68.2	110	North America	Lake	Raw	48	AWI	11	-47	14360	306.5	14407	Kettle lake in esker complex. Physiography: esker complex. Surrounding vegetation: spruce-fir, northern hardwoods.	1981-03-01 00:00:00
Lorino	Lorino	LORINO	10.21233/n30w7n	Neotoma (last access: 1 April 2021)	1612	1664	Lorino Exposure	65.5	-171.7	12	Asia	Peat	Raw	16	AWI	4	4177	22365	1212.5	18188	Exposure of peat and alluvium. Physiography: coastal lowland. Surrounding vegetation: graminoid-Salix-Betula tundra.		Anderson, P.M. and Lozhkin, A.V., 2002. Late Quaternary Vegetation and Climate of Siberia and the Russian Far East (Palynological and Radiocarbon Database). North East Science Center, Far East Branch, Russian Academy of Sciences, Magadan, Russia.		Ivanov, V.F., 1986. Quaternary deposits of the coast of eastern Chukotka. North East Interdisciplinary Research Institute, Far East Branch, USSR Academy of Sciences, Vladivostok (in Russian).
LOSTLKMT	LOSTLKMT	LOSTLKMT	10.21233/n3bj11	Neotoma (last access: 1 April 2021)	1614	1666	Lost Lake	47.6352	-110.484	1019	North America	Lake	Raw	43	AWI	4	-25	10579	252.5	10604	Lake in abandoned river channel. Physiography: base of Highwood Mountains. Surrounding vegetation: short-grass prairie.		Barnosky, C.W., 1989. Postglacial vegetation and climate in the northwestern Great Plains of Montana. Quaternary Research, 31(1), pp.57-73.	https://doi.org/10.1016/0033-5894(89)90085-9
LOSTPOND	LOSTPOND	LOSTPOND	10.21233/n36q9j	Neotoma (last access: 1 April 2021)	1615	1667	Lost P.	44.25	-71.25	635	North America	Lake	Raw	34	AWI	5	-35	15321	465.3	15356		1977-01-01 00:00:00	Davis, M.B., Spear, R.W. and Shane, L.C., 1980. Holocene climate of New England. Quaternary Research, 14(2), pp.240-250.	https://doi.org/10.1016/0033-5894(80)90051-4	Spear, R.W., Davis, M.B. and Shane, L.C., 1994. Late Quaternary history of low-and mid-elevation vegetation in the White Mountains of New Hampshire. Ecological Monographs, 64(1), pp.85-109.	https://doi.org/10.2307/2937056
LOUISEPD	LOUISEPD	LOUISEPD	10.21233/n37d23	Neotoma (last access: 1 April 2021)	1618	1670	Louise Pond	52.9464	-131.764	650	North America	Lake	Raw	49	AWI	7	12	11991.5	249.6	11979.5	Glacial scour lake. Physiography: Queen Charlotte Ranges, Louise Island. Surrounding vegetation: Tsuga mertensiana, Pinus contorta.		Pellatt, M.G. and Mathewes, R.W., 1994. Paleoecology of postglacial tree line fluctuations on the Queen Charlotte Islands, Canada. Ecoscience, 1(1), pp.71-81.	https://doi.org/10.1080/11956860.1994.11682230	Pellatt, M.G. and Mathewes, R.W., 1997. Holocene tree line and climate change on the Queen Charlotte Islands, Canada. Quaternary Research, 48(1), pp.88-99.	https://doi.org/10.1006/qres.1997.1903
LOXAHAT1	LOXAHAT1	LOXAHAT1	10.21233/n33p98	Neotoma (last access: 1 April 2021)	1619	1671	Loxahatchee National Wildlife Refuge Site 1 (EPA Site 7)	26.4811	-80.4156	5	North America	Peat	Raw	28	AWI	5	-56.5	1431	55.1	1487.5	Cladium marsh near tree island. Physiography: coastal plain. Surrounding vegetation: Cladium marsh near pop-up islands.	1995-04-21 00:00:00	Willard, D.A. and Weimer, L.M., 1997. Palynological census data from surface samples in south Florida. US Geological Survey Open-File Report, 97, p.867.		Willard, D.A., Holmes, C.W. and Weimer, L.M., 2001. The Florida Everglades ecosystem: climatic and anthropogenic impacts over the last two millennia. Bulletins of American Paleontology, 361, pp.41-56.
LPOMACOC	LPOMACOC	LPOMACOC	10.21233/n39j1q	Neotoma (last access: 1 April 2021)	1621	1674	Laguna Pomacocha	-11.75	-75.25	4450	South America	Lake	Raw	17	AWI	2	-53	12404	778.6	12457	Moraine dammed lake. Physiography: Eastern Cordillera of the Andes. Surrounding vegetation: Ichu grass.		Hansen, B.C.S., Seltzer, G.O. and Wright Jr, H.E., 1994. Late Quaternary vegetational change in the central Peruvian Andes. Palaeogeography, Palaeoclimatology, Palaeoecology, 109(2-4), pp.263-285.	https://doi.org/10.1016/0031-0182(94)90179-1
LTUCTUA	LTUCTUA	LTUCTUA	10.21233/n32p9z	Neotoma (last access: 1 April 2021)	1625	1679	Laguna Tuctua	-11.6667	-75	4250	South America	Lake	Raw	44	AWI	3	-67	17302	403.9	17369	Moraine dammed lake. Physiography: easternmost ridge of Eastern Cordillera. Surrounding vegetation: Ichu grass.		Hansen, B.C.S., Seltzer, G.O. and Wright Jr, H.E., 1994. Late Quaternary vegetational change in the central Peruvian Andes. Palaeogeography, Palaeoclimatology, Palaeoecology, 109(2-4), pp.263-285.	https://doi.org/10.1016/0031-0182(94)90179-1
LUKA	LUKA	LUKA	10.21233/n3j157	Neotoma (last access: 1 April 2021)	1626	1680	Lukaschin Yar Peat Exposure	61	78.5	65	Asia	Peat	Raw	25	AWI	13	406	11541	464	11135	Peat exposure in river terrace. Physiography: river valley. Surrounding vegetation: Pinus-Picea-Abies taiga.		Anderson, P.M. and Lozhkin, A.V., 2002. Late Quaternary Vegetation and Climate of Siberia and the Russian Far East (Palynological and Radiocarbon Database). North East Science Center, Far East Branch, Russian Academy of Sciences, Magadan, Russia.		Neishtadt, M.I., 1976. Holocene processes in western Siberia and associated problems. In: Studying and mastering the environment ed. by M.I. Neishtadt (pp.90-99). USSR Academy of Sciences, Institute of Geography, Moscow (in Russian).
LYNCHA	Lynchs_Crater	LYNCHA	10.21233/n38j1d	Neotoma (last access: 1 April 2021)	1628	1683	Lynch's Crater	-17.3659	145.686	760	Indopacific	Lake	Raw	233	AWI	26	745	192864	828.1	192119	Lynch's Crater has been filled with lake and swamp deposits to 45 m below the crater rim and the swamp is fed with water from a short inlet stream. Crater walls are steep on the north, west, and south sides. Little remains of the natural vegetation on the basalt-derived soils which have been cleared to grazing pasture for dairy cattle.		Kershaw, A.P., 1974. A long continuous pollen sequence from north-eastern Australia. Nature, 251(5472), pp.222-223.	https://doi.org/10.1038/251222a0	Kershaw, A.P., 1976. A late Pleistocene and Holocene pollen diagram from Lynch's Crater, northeastern Queensland, Australia. New Phytologist, 77(2), pp.469-498.	https://doi.org/10.1111/j.1469-8137.1976.tb01534.x	Kershaw, A.P., 1994. Pleistocene vegetation of the humid tropics of northeastern Queensland, Australia. Palaeogeography, Palaeoclimatology, Palaeoecology, 109(2-4), pp.399-412.	https://doi.org/10.1016/0031-0182(94)90188-0
LYNNLAKE	LYNNLAKE	LYNNLAKE	10.21233/n34t76	Neotoma (last access: 1 April 2021)	1629	1684	Lynn Lake	56.8417	-101.042	340	North America	Lake	Raw	31	AWI	7	-63	7699	258.7	7762	Peat bank. Physiography: Cockburn end moraine system. Surrounding vegetation: Picea.	1964-01-01 00:00:00	Bender, M.M., Bryson, R.A. and Baerreis, D.A., 1966. University of Wisconsin radiocarbon dates II. Radiocarbon, 8, pp.522-533.	https://doi.org/10.1017/S0033822200000333	Bender, M.M., Bryson, R.A. and Baerreis, D.A., 1967. University of Wisconsin radiocarbon dates III. Radiocarbon, 9, pp.530-544.	https://doi.org/10.1017/S0033822200000710	Bender, M.M., Bryson, R.A. and Baerreis, D.A., 1965. University of Wisconsin radiocarbon dates I. Radiocarbon, 7, pp.399-407.	https://doi.org/10.1017/S0033822200037334	Bender, M.M., Bryson, R.A. and Baerreis, D.A., 1968. University of Wisconsin radiocarbon dates IV. Radiocarbon, 10, pp.161-168.		Nichols, H., 1967. Central Canadian palynology and its relevance to northwestern Europe in the late Quaternary period. Review of Palaeobotany and Palynology, 2(1-4), pp.231-243.	https://doi.org/10.1016/0034-6667(67)90151-0	Nichols, H., 1967. Pollen diagrams from sub-arctic central Canada. Science, 155(3770), pp.1665-1668.	https://doi.org/10.1126/science.155.3770.1665
MADJAGA	MADJAGA	MADJAGA	10.21233/n35h14	Neotoma (last access: 1 April 2021)	1632	1687	Lake Madjagara	64.8333	120.967	160	Asia	Lake	Raw	66	AWI	8	190	7183	107.6	6993	Thermokarst lake. Physiography: early Pleistocene terrace with sands. Surrounding vegetation: larch forest.	1985-08-01 00:00:00	Tarasov, P.E., Harrison, S.P., Saarse, L., Pushenko, M.Y., Andreev, A.A., Aleshinskaya, Z.V., Davydova, N.N., Dorofeyuk, N.I., Efremov, Y.V., Khomutova, V.I., Sevastyanov, D.V., Tamosaitis, J., Uspenskaya, O.N., Yakushko, O.F. and Tarasova, I.V., 1994. Lake status records from the former Soviet Union and Mongolia: data base documentation. Paleoclimatology Publications Series 2, World Data Center-…		Andreev, A.A. and Klimanov, V.A., 1989. Vegetation and climate history of central Yakutia during the Holocene and Late Pleistocene. In: Formirovanie rel'efa, korelyatnykh otlozheny i rossypei Severo-Vostoka SSSR [Formation of deposits and placers on northeast of the USSR] ed. by B.F. Ivanov and B.F. Palymsky (pp.28-51). Publishing House of SVKNII, Magadan, Russia (in Russian).
MAL	MAL	MAL	10.21233/n3cb31	Neotoma (last access: 1 April 2021)	1636	1691	Tourbière du lac Malbaie	47.5972	-70.9764	818	North America	Peat	Raw	21	AWI	2	279	12428	607.5	12149	Raised string bog. Physiography: rolling stagnation moraine. Surrounding vegetation: Piceeto marianae - Abietetum.	1969-08-01 00:00:00	Richard, P.J.H., 1975. Histoire postglaciaire de la vegetation dans la partie centrale du Parc des Laurentides, Quebec. Le Naturaliste canadien, 102, pp.669-681 (in French).		Richard, P.J.H., 1977. Histoire post-wisconsinienne de la vegetation du Quebec meridional par l'analyse pollinique. Service de la recherche, Direction generale des forets, Ministere des Terres et Forets du Quebec (in French).
MALLINBO	MALLINBO	MALLINBO	10.21233/n3016n	Neotoma (last access: 1 April 2021)	1639	1694	Mallin Book	-41.3333	-71.5833	800	South America	Peat	Raw	63	AWI	9	319	16860	266.8	16541	Sedge bog behind L. Mascardi beach. Physiography: glacially carved valley. Surrounding vegetation: Nothofagus dombeyi/Austrocedrus forest.	1975-02-01 00:00:00	Markgraf, V., 1983. Late and postglacial vegetational and paleoclimatic changes in subantarctic, temperate, and arid environments in Argentina. Palynology, 7(1), pp.43-70.	https://doi.org/10.1080/01916122.1983.9989252
MALTAN	MALTAN	MALTAN	10.21233/n3892c	Neotoma (last access: 1 April 2021)	1640	1695	Maltan River Exposure	60.8833	151.617	735	Asia	Alluvial/Fluvial	Raw	22	AWI	11	1012	12026	524.5	11014	Exposure along river terrace. Physiography: river valley in mountains. Surrounding vegetation: Larix dahurica forest.		Anderson, P.M. and Lozhkin, A.V., 2002. Late Quaternary Vegetation and Climate of Siberia and the Russian Far East (Palynological and Radiocarbon Database). North East Science Center, Far East Branch, Russian Academy of Sciences, Magadan, Russia.		Lozhkin, A.V. and Glushkova, O.Y., 1997. Boreal peats in the upper Kolyma basin. In: Late Pleistocene and Holocene of Beringia ed. by M.K. Gagiev (pp.55-62). North East Interdisciplinary Research Institute, Far East Branch, Russian Academy of Sciences, Magadan (in Russian).		Vazhenina, L.N., 1997. Early Holocene seed flora from peat, Maltan River, upper Kolyma. In: Late Pleistocene and Holocene of Beringia ed. by M.K. Gagiev (pp.63-69). North East Interdisciplinary Research Institute, Far East Branch, Russian Academy of Sciences, Magadan (in Russian).
MAMENM	MAMENM	MAMENM	10.21233/n34h1t	Neotoma (last access: 1 April 2021)	1641	1696	Enmynveem River (mammoth site)	68.1667	165.933	400	Asia	Peat	Raw	11	AWI	4	9207	37202	2799.5	27995	Peat and colluvium exposed during mining. Physiography: river valley in mountains. Surrounding vegetation: open Larix dahurica forest.		Anderson, P.M. and Lozhkin, A.V., 2002. Late Quaternary Vegetation and Climate of Siberia and the Russian Far East (Palynological and Radiocarbon Database). North East Science Center, Far East Branch, Russian Academy of Sciences, Magadan, Russia.		Lozhkin, A.V., Pavlov, G.F., Ryabchun, V.K., Gorbachev, A.L., Zadal'skii, S.V. and Shubert, E.E., 1988. A new mammoth discovery in Chukotka. Doklady Akademii Nauk, 302(6), pp.1440-1444 (in Russian).
MANSELL	MANSELL	MANSELL	10.21233/n3g45n	Neotoma (last access: 1 April 2021)	1643	1698	Mansell Pond	45.04	-68.73	58	North America	Lake	Raw	110	AWI	10	-52	10109	93.2	10161	Kettle lake. Physiography: lowland, Penobscot River Valley.	1992-01-01 00:00:00	Almquist-Jacobson, H. and Sanger, D., 1995. Holocene climate and vegetation in the Milford drainage basin, Maine, USA, and their implications for human history. Vegetation History and Archaeobotany, 4(4), pp.211-222.	https://doi.org/10.1007/BF00235752
MAPLHRST	MAPLHRST	MAPLHRST	10.21233/n32t7k	Neotoma (last access: 1 April 2021)	1646	1701	Maplehurst Lake	43.225	-80.6597	300	North America	Lake	Raw	54	AWI	5	116	14832	277.7	14716			McAndrews, J.H., 1981. Late Quaternary climate of Ontario: temperature trends from the fossil pollen record. In: Quaternary paleoclimate ed. by W.C. Mahaney (pp.319-333). Geo Abstracts, Ltd., University of East Anglia, Norwich, United Kingdom.		Mott, R.J. and Farley-Gill, L.D., 1978. A late-Quaternary pollen profile from Woodstock, Ontario. Canadian Journal of Earth Sciences, 15(7), pp.1101-1111.	https://doi.org/10.1139/e78-116
MARC	MARC	MARC	10.21233/n3793f	Neotoma (last access: 1 April 2021)	1647	1703	Lac Marcotte	47.05	-71.4	503	North America	Lake	Raw	47	AWI	6	-65	12865	281.1	12930	Rock basin lake. Physiography: rolling stagnation moraine. Surrounding vegetation: Betulo papyriferaea - Abietetum.	1977-01-01 00:00:00	Labelle, C. and Richard, P., 1981. Vegetation tardiglaciaire et postglaciaire au sud-est du parc des Laurentides, Quebec. Geographie physique et Quaternaire, 35(3), pp.345-359 (in French).	https://doi.org/10.7202/1000544ar
MARIA	MARIA	MARIA	10.21233/n33h1h	Neotoma (last access: 1 April 2021)	1648	1704	M Lake	68.2667	-133.467	105	North America	Lake	Raw	71	AWI	5	-30	14351	205.4	14381	Small deep lake in bedrock basin. Physiography: Campbell-Dolomite Uplands.		Ritchie, J.C., 1984. Past and present vegetation of the far northwest of Canada. University of Toronto Press, Toronto, Ontario, Canada.		Ritchie, J.C., 1977. The modern and late Quaternary vegetation of the Campbell-Dolomite uplands, near Inuvik, NWT, Canada. Ecological Monographs, 47(4), pp.401-423.	https://doi.org/10.2307/1942175
MARION	MARION	MARION	10.21233/n3jt89	Neotoma (last access: 1 April 2021)	1649	1705	Marion Lake	49.3083	-122.547	305	North America	Lake	Raw	116	AWI	8	-10	14667.5	127.6	14677.5	Lake in valley depression. Physiography: hilly and mountainous. Surrounding vegetation: western hemlock forest.		Mathewes, R.W., 1973. A palynological study of postglacial vegetation changes in the University Research Forest, southwestern British Columbia. Canadian Journal of Botany, 51(11), pp.2085-2103.	https://doi.org/10.1139/b73-271	Mathewes, R.W. and Heusser, L.E., 1981. A 12 000 year palynological record of temperature and precipitation trends in southwestern British Columbia. Canadian Journal of Botany, 59(5), pp.707-710.	https://doi.org/10.1139/b81-100
MARIPOSA	MARIPOSA	MARIPOSA	10.21233/n3f45b	Neotoma (last access: 1 April 2021)	1651	1707	Mariposa Lake	44.15	-110.24	2730	North America	Lake	Raw	34	AWI	5	-62	15245	463.8	15307	Glacial scour lake. Physiography: Pinyon Peak Highlands. Surrounding vegetation: Pinus contorta forest in old burns.	1985-08-01 00:00:00	Steventon, R.L. and Kutzbach, J.E., 1987. University of Wisconsin radiocarbon dates XXIV. Radiocarbon, 29(3), pp.397-415.	https://doi.org/10.1017/S0033822200043794	Steventon, R.L. and Kutzbach, J.E., 1988. University of Wisconsin radiocarbon dates XXV. Radiocarbon, 30(3), pp.367-383.	https://doi.org/10.1017/S0033822200044416	Whitlock, C., 1993. Postglacial vegetation and climate of Grand Teton and southern Yellowstone National Parks. Ecological Monographs, 63(2), pp.173-198.	https://doi.org/10.2307/2937179	Whitlock, C. and Bartlein, P.J., 1993. Spatial variations of Holocene climatic change in the Yellowstone region. Quaternary Research, 39(2), pp.231-238.	https://doi.org/10.1006/qres.1993.1026
MARTYNE	MARTYNE	MARTYNE	10.21233/n35m96	Neotoma (last access: 1 April 2021)	1653	1709	Lac Martyne	56.78	-64.83	365	North America	Lake	Raw	32	AWI	3	37	7696	247.1	7659
MASCARDI	MASCARDI	MASCARDI	10.21233/n3b34p	Neotoma (last access: 1 April 2021)	1655	1711	Lago Mascardi-Gutierrez	-41.25	-71.4667	800	South America	Peat	Raw	61	AWI	3	83	11169	184.8	11086	Bog. Physiography: sediments deposited in morainedamed lake. Surrounding vegetation: Mixed Nothfagus dombeyi-Austrocedrus chi.	1958-01-01 00:00:00	Markgraf, V., 1983. Late and postglacial vegetational and paleoclimatic changes in subantarctic, temperate, and arid environments in Argentina. Palynology, 7(1), pp.43-70.	https://doi.org/10.1080/01916122.1983.9989252
MAU3	MAU3	MAU3	10.21233/n3d451	Neotoma (last access: 1 April 2021)	1659	1715	Wapizagonke	46.7264	-73.0306	230	North America	Peat	Raw	31	AWI	2	847	11214	345.6	10367	Peat bog over kettle lake. Physiography: fluvioglacial terrasse, steep hills. Surrounding vegetation: Betulo luteae - Aceretum sacchari.	1974-06-18 00:00:00	Richard, P.J.H., 1977. Histoire post-wisconsinienne de la vegetation du Quebec meridional par l'analyse pollinique. Service de la recherche, Direction generale des forets, Ministere des Terres et Forets du Quebec (in French).
MAU5	MAU5	MAU5	10.21233/n38f2r	Neotoma (last access: 1 April 2021)	1660	1716	Sud du Lac du Noyer	46.7878	-72.8378	270	North America	Lake	Raw	35	AWI	5	187	11131	321.9	10944	Rock basin lake. Physiography: rolling moraine over prominent hills. Surrounding vegetation: Betulo luteae - Aceretum sacchari.	1974-09-09 00:00:00	Richard, P.J.H., 1977. Histoire post-wisconsinienne de la vegetation du Quebec meridional par l'analyse pollinique. Service de la recherche, Direction generale des forets, Ministere des Terres et Forets du Quebec (in French).
MAYFLOWR	MAYFLOWR	MAYFLOWR	10.21233/n30x70	Neotoma (last access: 1 April 2021)	1662	1718	Mayflower Lake	45.3028	-66.0708	50	North America	Lake	Raw	32	AWI	4	9972	14426	143.7	4454	Small steep sided pond. Physiography: broad rolling lowlands, Appalachian Prov. Surrounding vegetation: Thuja, Picea, Betula, Acer,.		Levesque, A.J., Mayle, F.E., Walker, I.R. and Cwynar, L.C., 1993. A previously unrecognized late-glacial cold event in eastern North America. Nature, 361(6413), pp.623-626.	https://doi.org/10.1038/361623a0	Mayle, F.E., Levesque, A.J. and Cwynar, L.C., 1993. Accelerator-mass-spectrometer ages for the Younger Dryas event in Atlantic Canada. Quaternary Research, 39(3), pp.355-360.	https://doi.org/10.1006/qres.1993.1042	Mayle, F.E. and Cwynar, L.C., 1995. A review of multi-proxy data for the Younger Dryas in Atlantic Canada. Quaternary Science Reviews, 14(9), pp.813-821.	https://doi.org/10.1016/0277-3791(95)00063-1	Mayle, F.E. and Cwynar, L.C., 1995. Impact of the Younger Dryas cooling event upon lowland vegetation of Maritime Canada. Ecological Monographs, 65(2), pp.129-154.	https://doi.org/10.2307/2937135	Levesque, A.J., Mayle, F.E., Walker, I.R. and Cwynar, L.C., 1993. A previously unrecognized late-glacial cold event in eastern North America. Nature, 361(6413), pp.623-626.	https://doi.org/10.1038/361623a0
MCCAR	MCCAR	MCCAR	10.21233/n3935r	Neotoma (last access: 1 April 2021)	1663	1719	McCarston's Lake	45.05	-80.09	433	North America	Lake	Raw	47	AWI	2	-35	9884	215.6	9919
MCMASTER	MCMASTER	MCMASTER	10.21233/n3c45q	Neotoma (last access: 1 April 2021)	1668	1724	McMaster Lake	64.1333	-110.583	480	North America	Lake	Raw	27	AWI	5	-54	7350	284.8	7404	Glacial lake. Physiography: Canadian shield, rolling terrain. Surrounding vegetation: Alnus crispa, Betula glandulosa tundra.		MacDonald, G.M., Edwards, T.W., Moser, K.A., Pienitz, R. and Smol, J.P., 1993. Rapid response of treeline vegetation and lakes to past climate warming. Nature, 361(6409), pp.243-246.	https://doi.org/10.1038/361243a0	Moser, K.A. and MacDonald, G.M., 1990. Holocene vegetation change at treeline north of Yellowknife, Northwest Territories, Canada. Quaternary Research, 34(2), pp.227-239.	https://doi.org/10.1016/0033-5894(90)90033-H
MCNRNY2A	MCNRNY2A	MCNRNY2A	10.21233/n37f12	Neotoma (last access: 1 April 2021)	1669	1725	McNearney Lake	46.4269	-84.952	264	North America	Lake	Raw	19	AWI	9	-5.5	316.5	17.9	322	Seepage lake. Physiography: gently rolling terrain. Surrounding vegetation: Pinus/Tsuga/Acer/Fagus/Populus.	1984-02-16 00:00:00	Charles, D.F. and Whitehead, D.R., 1984. Paleoecological Investigation of Recent Lake Acidification (PIRLA): December 1984 Status Report. RP 2174-10, Electric Power Research Institute, Palo Alto, CA.		Charles, D.F. and Whitehead, D.R., 1986. Paleoecological Investigation of Recent Lake Acidification (PIRLA): Methods and Project Description. EPRI EA-4906, Electric Power Research Institute, Palo Alto, CA.		Shane, L.C., 1987. Northern Great Lakes States pollen and charcoal data. PIRLA Unpublished Report Series 9, Indiana University, Bloomington, IN.		Kingston, J.C., Cook, R.B., Kreis, R.G., Camburn, K.E., Norton, S.A., Sweets, P.R., Binford, M.W., Mitchell, M.J., Schindler, S.C., Shane, L.C.K. and King, G.A., 1990. Paleoecological investigation of recent lake acidification in the northern Great Lakes states. Journal of Paleolimnology, 4(2), pp.153-201.	https://doi.org/10.1007/BF00226322
MEDICIN2	MEDICIN2	MEDICIN2	10.21233/n3835f	Neotoma (last access: 1 April 2021)	1676	1732	Medicine Lake	44.9842	-97.3501	519	North America	Lake	Raw	19	AWI	6	8952	12177	179.2	3225	Lake in glacial outwash channel. Physiography: Prairie Coteau. Surrounding vegetation: pasture, hayed areas, Populus.	1991-01-01 00:00:00	Allen, K.E., 1992. Geochemical stratigraphy of Medicine Lake, South Dakota: Paleoclimatic implications of the freshwater/ saline transition. Doctoral dissertation. University of Minnesota, Minneapolis, Minnesota, USA.		Radle, N.J., 1981. Vegetation history and lake-level changes at a saline lake in northeastern South Dakota. Doctoral dissertation. University of Minnesota, Minneapolis, Minnesota, USA.		Radle, N., Keister, C.M. and Battarbee, R.W., 1989. Diatom, pollen, and geochemical evidence for the palaeosalinity of Medicine Lake, S. Dakota, during the late-Wisconsin and early Holocene. Journal of Paleolimnology, 2(3), pp.159-172.	https://doi.org/10.1007/BF00202044
MELEZE	MELEZE	MELEZE	10.21233/n34d25	Neotoma (last access: 1 April 2021)	1677	1733	Lac Mélèze	65.21	-126.13	650	North America	Lake	Raw	47	AWI	6	-32	13206	287.8	13238	Small lake, origin uncertain. Physiography: Franklin Mountains. Surrounding vegetation: Picea mariana-Sphagnum muskeg/Larix.	1982-04-20 00:00:00	MacDonald, G.M., 1987. Postglacial vegetation history of the Mackenzie River Basin. Quaternary Research, 28(2), pp.245-262.	https://doi.org/10.1016/0033-5894(87)90063-9
MENDOTAC	MENDOTAC	MENDOTAC	10.21233/n3fx71	Neotoma (last access: 1 April 2021)	1679	1735	Lake Mendota	43.1	-89.4167	257	North America	Lake	Raw	34	AWI	5	131	13206.5	396.2	13075.5			Winkler, M.G., 1985. Late-glacial and Holocene environmental history of south-central Wisconsin: a study of upland and wetland ecosystems. Doctoral dissertation. University of Wisconsin, Madison, Wisconsin, USA.		Winkler, M.G., Swain, A.M. and Kutzbach, J.E., 1986. Middle Holocene dry period in the northern midwestern United States: lake levels and pollen stratigraphy. Quaternary Research, 25(2), pp.235-250.	https://doi.org/10.1016/0033-5894(86)90060-8
Mereya_River	Mereya_River	MER4000	10.21233/n3b742	Neotoma (last access: 1 April 2021)	1680	1736	Mereya River, Lagoon Terrace Exposure S4000(30)	46.6167	142.917	4	Asia	Coast	Raw	27	AWI	5	908	17389	633.9	16481	Marine terrace capped by peat. Physiography: coastal plain. Surrounding vegetation: Picea-Abies forest.	1985-07-18 00:00:00	Anderson, P.M. and Lozhkin, A.V., 2002. Late Quaternary Vegetation and Climate of Siberia and the Russian Far East (Palynological and Radiocarbon Database). North East Science Center, Far East Branch, Russian Academy of Sciences, Magadan, Russia.
MIMI	MIMI	MIMI	10.21233/n3874f	Neotoma (last access: 1 April 2021)	1698	1754	Lac Mimi	47.4969	-70.3758	423	North America	Lake	Raw	38	AWI	5	1042	13609	339.6	12567	Rock basin. Physiography: low mountain with steep slopes. Surrounding vegetation: Betulo papyriferaea - Abietetum.	1971-01-01 00:00:00	Larouche, A.C., 1979. Histoire postglaciaire comparee de la vegetation a Sainte-Foy et au Mont des Eboulements, par l'analyse pollinique et macrofossile. Master's thesis. Universite Laval, Quebec, Canada (in French).		Richard, P. and Poulin, P., 1976. Un diagramme pollinique au Mont des Eboulements, region de Charlevoix, Quebec. Canadian Journal of Earth Sciences, 13(1), pp.145-156 (in French).	https://doi.org/10.1139/e76-014	Richard, P.J.H., 1977. Histoire post-wisconsinienne de la vegetation du Quebec meridional par l'analyse pollinique. Service de la recherche, Direction generale des forets, Ministere des Terres et Forets du Quebec (in French).
MINAKOKO	MINAKOKO	MINAKOKO	10.21233/n34j15	Neotoma (last access: 1 April 2021)	1699	1755	Minakokosa Lake	66.9167	-155.033	122	North America	Lake	Raw	55	AWI	6	455	22383	406.1	21928	Morainally dammed lake. Physiography: valley bordered by mountains. Surrounding vegetation: spruce forest-shrub tundra.	1985-07-01 00:00:00
MIRANDA	MIRANDA	MIRANDA	10.21233/n38w74	Neotoma (last access: 1 April 2021)	1702	1758	Paramo de Miranda	8.91667	-70.8333	3290	South America	Peat	Raw	37	AWI	4	327	17752	484	17425	Bog. Physiography: fluvio-glacial terrace. Surrounding vegetation: superparamo grasslands.		Salgado-Labouriau, M.L., Rull, V., Schubert, C. and Va, S., 1988. The establishment of vegetation after late Pleistocene deglaciation in the Paramo de Miranda, Venezuelan Andes. Review of Palaeobotany and palynology, 55(1-3), pp.5-17.	https://doi.org/10.1016/0034-6667(88)90052-8	Salgado-Labouriau, M.L., 1987. Sequence of colonization by plants in the Venezuelan Andes after the last Pleistocene glaciation. Journal of palynology, 23, pp.189-204.		Salgado-Labouriau, M.L., 1991. Vegetation and climatic changes in the Merida Andes during the last 13,000 years. Boletim Instituto de Geociencias, Universidade de Sao Paulo, 8, pp.159-170.
MOLASBOG	MOLASBOG	MOLASBOG	10.21233/n3c162	Neotoma (last access: 1 April 2021)	1706	1762	Molas Pass Bog	37.7378	-107.698	3220	North America	Peat	Raw	29	AWI	2	70	10859	385.3	10789	Linear depression of limestone bedrock. Physiography: Animas Valley, San Juan Mountains. Surrounding vegetation: Picea, Abies, and grassland.	1960-07-01 00:00:00	Maher Jr, L.J., 1961. Pollen analysis and postglacial vegetation history in the Animas Valley Region, Southern San Juan Mountains, Colorado. Doctoral dissertation. University of Minnesota, Minneapolis, Minnesota, USA.		Bender, M.M., Bryson, R.A. and Baerreis, D.A., 1970. University of Wisconsin radiocarbon dates VII. Radiocarbon, 12(1), pp.335-345.	https://doi.org/10.1017/S0033822200036377	Hubbs, C.L., Bien, G.S. and Suess, H.E., 1963. La Jolla Natural Radiocarbon Measurements III. Radiocarbon, 5, pp.254-272.	https://doi.org/10.1017/S0033822200036882	Maher Jr, L.J., 1963. Pollen analyses of surface materials from the southern San Juan Mountains, Colorado. Geological Society of America Bulletin, 74(12), pp.1485-1503.	https://doi.org/10.1130/0016-7606(1963)74[1485:PAOSMF]2.0.CO;2	Maher Jr, L.J., 1972. Nomograms for computing 0.95 confidence limits of pollen data. Review of Palaeobotany and Palynology, 13(2), pp.85-93.	https://doi.org/10.1016/0034-6667(72)90038-3
MONHEGAN	MONHEGAN	MONHEGAN	10.21233/n3775h	Neotoma (last access: 1 April 2021)	1707	1763	Monhegan Island Meadow	43.7667	-69.3	3	North America	Coast	Raw	35	AWI	17	-10	11017	324.3	11027		1975-08-01 00:00:00	Bostwick, L.G., 1978. An environmental framework for cultural change in Maine: Pollen influx and percentage diagrams from Monhegan Island. Doctoral dissertation. University of Maine, Orono, Maine, USA.
MONTEZUM	MONTEZUM	MONTEZUM	10.21233/n3cq0p	Neotoma (last access: 1 April 2021)	1710	1766	Montezuma Well	34.6492	-111.752	1081	North America	Lake	Raw	70	Neotoma_SKOPE	6	-35	12838	186.6	12873	Thermal spring sinkhole, 16 m deep. Surrounding vegetation: desert scrub/semidesert grassland.	1985-09-21 00:00:00	Shafer, D.S., 1989. The timing of late Quaternary monsoon precipitation maxima in the southwest United States. Doctoral dissertation. University of Arizona, Tucson, Arizona, USA.		Davis, O.K. and Shafer, D.S., 1992. A Holocene climatic record for the Sonoran Desert from pollen analysis of Montezuma Well, Arizona, USA. Palaeogeography, Palaeoclimatology, Palaeoecology, 92(1-2), pp.107-119.	https://doi.org/10.1016/0031-0182(92)90137-T
MOONEHOL	MOONEHOL	MOONEHOL	10.21233/n3464v	Neotoma (last access: 1 April 2021)	1711	1768	Moon Lake	46.8559	-98.1598	444	North America	Lake	Raw	170	AWI	14	-44	13746	81.6	13790	Kettle lake. Physiography: rolling end moraine. Native vegetaton: transition from tallgrass to mixed grass prairie. Heavily agricultural today.	1986-01-31 00:00:00	Laird, K.R., 1996. A high-resolution paleoclimatic record of a closed-basin lake in the northern Great Plains. Doctoral dissertation. University of Minnesota, Minneapolis, Minnesota, USA.		Laird, K.R., Fritz, S.C., Grimm, E.C. and Mueller, P.G., 1996. Century scale paleoclimatic reconstruction from Moon Lake, a closed-basin lake in the northern Great Plains. Limnology and Oceanography, 41(5), pp.890-902.	https://doi.org/10.4319/lo.1996.41.5.0890	Laird, K.R., Fritz, S.C., Maasch, K.A. and Cumming, B.F., 1996. Greater drought intensity and frequency before AD 1200 in the Northern Great Plains, USA. Nature, 384(6609), pp.552-554.	https://doi.org/10.1038/384552a0
MORAINE	MORAINE	MORAINE	10.21233/n30h1k	Neotoma (last access: 1 April 2021)	1712	1769	18 [Moraine Lake]	52.2667	-58.05	385	North America	Lake	Raw	47	AWI	6	76	11663	251.9	11587			Engstrom, D.R. and Hansen, B.C.S., 1985. Postglacial vegetational change and soil development in southeastern Labrador as inferred from pollen and chemical stratigraphy. Canadian Journal of Botany, 63(3), pp.543-561.	https://doi.org/10.1139/b85-070
MORDSGER	MORDSGER	MORDSGER	10.21233/n3ft8c	Neotoma (last access: 1 April 2021)	1713	1770	Mordsger Lake	51.3833	-94.25	400	North America	Lake	Raw	30	AWI	2	39	10412	357.7	10373	Physiography: Canadian shield, 10-30 m local relief. Surrounding vegetation: Picea mariana/Pinus banksiana.		McAndrews, J.H., 1986. Vegetation history of the Bloodvein River region in Woodland Caribou Provincial Park, Ontario. Unpublished. Ontario Ministry of Natural Resources and Parks, Petersborough, Ontario, Canada.
MORENOGL	MORENOGL	MORENOGL	10.21233/n3b16r	Neotoma (last access: 1 April 2021)	1714	1771	Moreno Glacier Bog	-50.4667	-73	200	South America	Peat	Raw	37	AWI	2	-68	10787	301.5	10855	Peatbog in valley east Moreno Gl.lookout. Physiography: glacier carved valley. Surrounding vegetation: Nothofagus pumilio forest.	1975-01-01 00:00:00	Mercer, J.H. and Ager, T.A., 1983. Glacial and floral changes in southern Argentina since 14,000 years ago. National Geographic Society Research Reports, 15, pp.457-477.
MOSQUIT3	MOSQUIT3	MOSQUIT3	10.21233/n36b3g	Neotoma (last access: 1 April 2021)	1715	1772	Mosquito Lake Bog	48.7692	-122.118	198	North America	Peat	Raw	59	AWI	4	2387	17159	254.7	14772	Sphagnum bog. Physiography: Puget Sound Lowland. Surrounding vegetation: western hemlock-douglas fir.	1980-09-16 00:00:00	Steventon, R.L. and Kutzbach, J.E., 1986. University of Wisconsin Radiocarbon Dates XXIII. Radiocarbon, 28(3), pp.1206-1223.	https://doi.org/10.1017/S003382220002021X	Hansen, B.S. and Easterbrook, D.J., 1974. Stratigraphy and palynology of late Quaternary sediments in the Puget Lowland, Washington. Geological Society of America Bulletin, 85(4), pp.587-602.	https://doi.org/10.1130/0016-7606(1974)85<587:SAPOLQ>2.0.CO;2
MOULTON	MOULTON	MOULTON	10.21233/n32j05	Neotoma (last access: 1 April 2021)	1716	1773	Moulton Pond	44.6275	-68.6392	143	North America	Lake	Raw	34	AWI	15	-37	17032	517.2	17069			Davis, R.B., Bradstreet, T.E., Stuckenrath Jr, R. and Borns Jr, H.W., 1975. Vegetation and associated environments during the past 14,000 years near Moulton Pond, Maine. Quaternary Research, 5(3), pp.435-465.	https://doi.org/10.1016/0033-5894(75)90041-1
MUDLAKE	MUDLAKE	MUDLAKE	10.21233/n3364j	Neotoma (last access: 1 April 2021)	1719	1776	Mud Lake	29.2999	-81.866	9	North America	Lake	Raw	77	AWI	6	-69	54231	714.5	54300	Sinkhole lake. Upland vegetation i sand-pine (Pinus clausa) scrub, with a dense understory of sclerophyllous shrubs, including Quercus myrtifolia, Q. virginiana, Q. chapmanni, Q. margaretta, Carya floridana, Serenoa repens, Sabal etonia, Vaccinium arboreum, Lyonia ferruginea, Persia humilis, and Ceratiola ericoides. The escarpment east of the lake is occupied by a 200-m zone of Southern Mixed Har…		Bradley, W.H., 1966. Tropical lakes, copropel, and oil shale. Geological Society of America Bulletin, 77(12), pp.1333-1337.	https://doi.org/10.1130/0016-7606(1966)77[1333:TLCAOS]2.0.CO;2	Watts, W.A., 1969. A pollen diagram from Mud Lake, Marion County, north-central Florida. Geological Society of America Bulletin, 80(4), pp.631-642.	https://doi.org/10.1130/0016-7606(1969)80[631:APDFML]2.0.CO;2	Watts, W.A., 1971. Postglacial and interglacial vegetation history of southern Georgia and central Florida. Ecology, 52(4), pp.676-690.	https://doi.org/10.2307/1934159
MUDLKMN2	MUDLKMN2	MUDLKMN2	10.21233/n3dt82	Neotoma (last access: 1 April 2021)	1721	1778	Mud Lake	46.8589	-94.7554	424	North America	Lake	Raw	15	AWI	3	-35	3961	285.4	3996	Kettle lake in drumlin field. Physiography: outwash capped drumlin field. Surrounding vegetation: Pinus banksiana forest.	1980-03-29 00:00:00	Almendinger, J.C., 1992. The late Holocene history of prairie, brush-prairie, and jack pine (Pinus banksiana) forest on outwash plains, north-central Minnesota, USA. The Holocene, 2(1), pp.37-50.	https://doi.org/10.1177/095968369200200105	Almendinger, J.C., 1985. The late-Holocene development of jack pine forests on outwash plains, north-central Minnesota. Doctoral dissertation. University of Minnesota, Minneapolis, Minnesota, USA.
MUNDAY	MUNDAY	MUNDAY	10.21233/n3917t	Neotoma (last access: 1 April 2021)	1723	1780	Munday Creek	60.0333	-141.967	88	North America	Peat	Raw	111	AWI	5	-27	11052	100.7	11079	Muskeg. Physiography: Coastal mountains. Surrounding vegetation: Picea, Tsuga het, Tsuga mer, Alnus.		Peteet, D.M., 1986. Modern pollen rain and vegetational history of the Malaspina Glacier District, Alaska. Quaternary Research, 25(1), pp.100-120.	https://doi.org/10.1016/0033-5894(86)90047-5
MUSCOTAA	MUSCOTAA	MUSCOTAA	10.21233/vrv9-4t45	Neotoma (last access: 1 April 2021)	1725	1782	Muscotah Marsh	39.53	-95.5133	280	North America	Peat	Raw	52	AWI	4	298	32351	628.5	32053	Marsh maintained by an artesian spring. Physiography: floodplain edge of the Delaware River.		Gruger, J., 1973. Studies on the late Quaternary vegetation history of northeastern Kansas. Geological Society of America Bulletin, 84(1), pp.239-250.	https://doi.org/10.1130/0016-7606(1973)84<239:SOTLQV>2.0.CO;2
MUSKOX_neotoma	MUSKOX_neotoma	MUSKOX	10.21233/n39s7d	Neotoma (last access: 1 April 2021)	1726	1783	Muskox Lake	71.7833	-122.667	305	North America	Lake	Raw	18	AWI	4	-61	16078	949.4	16139	Depression in morainal deposits. Physiography: morainal deposits of Kellett till.		Gajewski, K., Mott, R.J., Ritchie, J.C. and Hadden, K., 2000. Holocene vegetation history of Banks Island, Northwest Territories, Canada. Canadian Journal of Botany, 78(4), pp.430-436.	https://doi.org/10.1139/b00-018
MYRTLE_neotoma	MYRTLE_neotoma	MYRTLE	10.21233/n3293w	Neotoma (last access: 1 April 2021)	1729	1786	Myrtle Lake	47.9826	-93.3853	393	North America	Lake	Raw	82	AWI	5	37	12446	153.2	12409	Lake surrounded by peatland. Physiography: Red Lake lowlands. Surrounding vegetation: Sphagnum, Piceto-Chamaedophnetum.		Janssen, C.R., 1968. Myrtle Lake: A late-and post-glacial pollen diagram from northern Minnesota. Canadian Journal of Botany, 46(11), pp.1397-1408.	https://doi.org/10.1139/b68-190	Janssen, C.R., 1984. Modern pollen assemblages and vegetation in the Myrtle Lake peatland, Minnesota. Ecological Monographs, 54(2), pp.213-252.	https://doi.org/10.2307/1942662	Stuiver, M., 1969. Yale natural radiocarbon measurements IX. Radiocarbon, 11(2), pp.545-658.	https://doi.org/10.1017/S0033822200011413
NATLA_neotoma	NATLA_neotoma	NATLA	10.21233/n3hn07	Neotoma (last access: 1 April 2021)	1731	1788	Natla Bog	63.0167	-128.8	1380	North America	Peat	Raw	22	AWI	6	-64	10104	484.2	10168	Bog dissected by Natla River. Physiography: intermontane basin. Surrounding vegetation: Betula, Cladonia, Carex, Sphagnum.	1980-06-24 00:00:00	MacDonald, G.M., 1983. Holocene vegetation history of the upper Natla River area, Northwest Territories, Canada. Arctic and Alpine Research, 15(2), pp.169-180.	https://doi.org/10.1080/00040851.1983.12004341
NATURAL	NATURAL	NATURAL	10.21233/n3ct8r	Neotoma (last access: 1 April 2021)	1732	1789	Natural Lake	34.6633	-95.3861	170	North America	Lake	Raw	13	AWI	5	-31.5	1857	157.4	1888.5	Lake on floodplain, formed on shale. Physiography: Ouachita Mountains. Surrounding vegetation: cattails, willows, elms, oaks.	1977-08-01 00:00:00	Albert, L.E. and Wyckoff, D.G., 1981. Ferndale Bog and Natural Lake: five thousand years of environmental change in southeastern Oklahoma. Studies in Oklahoma's Past 7. Oklahoma Archaeological Survey, Norman, Oklahoma, USA.		Hall, S.A., 1983. Ferndale Bog and Natural Lake: Five Thousand Years of Environmental Change in Southeastern Oklahoma. Plains Anthropologist, 28, pp.150-151.
NED	NED	NED	10.21233/n34b2g	Neotoma (last access: 1 April 2021)	1733	1791	Nedlouc	57.65	-71.65	330	North America	Lake	Raw	21	AWI	7	26	5413	269.4	5387	Rock basin lake. Physiography: Morainic plateau, shallow till. Surrounding vegetation: Shrub tundra / Forest tundra.	1976-07-18 00:00:00	Richard, P.J.H., 1981. Paleophytogeographie postglaciaire en Ungava par l'analyse pollinique. Collection Paleo-Quebec, 13, P.154 (in French).
NELSLK	NELSLK	NELSLK	10.21233/n38s8g	Neotoma (last access: 1 April 2021)	1735	1793	Nels Lake	48.024	-91.892	428	North America	Lake	Raw	18	Neotoma_NAPD 1	15	-33	97	7.6	130	Drainage lake. Surrounding vegetation: pine/aspen/spruce.	1984-01-23 00:00:00	Charles, D.F. and Whitehead, D.R., 1984. Paleoecological Investigation of Recent Lake Acidification (PIRLA): December 1984 Status Report. RP 2174-10, Electric Power Research Institute, Palo Alto, CA.		Charles, D.F. and Whitehead, D.R., 1986. Paleoecological Investigation of Recent Lake Acidification (PIRLA): Methods and Project Description. EPRI EA-4906, Electric Power Research Institute, Palo Alto, CA.		Shane, L.C., 1987. Northern Great Lakes States pollen and charcoal data. PIRLA Unpublished Report Series 9, Indiana University, Bloomington, IN.		Kingston, J.C., Cook, R.B., Kreis, R.G., Camburn, K.E., Norton, S.A., Sweets, P.R., Binford, M.W., Mitchell, M.J., Schindler, S.C., Shane, L.C.K. and King, G.A., 1990. Paleoecological investigation of recent lake acidification in the northern Great Lakes states. Journal of Paleolimnology, 4(2), pp.153-201.	https://doi.org/10.1007/BF00226322
NELSONPD	NELSONPD	NELSONPD	10.21233/n3506v	Neotoma (last access: 1 April 2021)	1736	1794	Nelson Pond	46.4071	-92.6866	335	North America	Lake	Raw	38	AWI	2	6299	8603	62.3	2304	Pond on red clay till, Nickerson Moraine. Physiography: strongly rolling. Surrounding vegetation: agricultural.	1974-12-01 00:00:00	Jacobson Jr, G.L., 1975. A palynological study of the history and ecology of white pine in Minnesota. Doctoral dissertation. University of Minnesota, Minneapolis, Minnesota, USA.		Bender, M.M., Bryson, R.A. and Baerreis, D.A., 1977. University of Wisconsin radiocarbon dates XIV. Radiocarbon, 19(1), pp.127-137.	https://doi.org/10.1017/S0033822200003404	Jacobson Jr, G.L., 1979. The palaeoecology of white pine (Pinus strobus) in Minnesota. Journal of Ecology, 67(2), pp.697-726.	https://doi.org/10.2307/2259121
NEVADASA	NEVADASA	NEVADASA	10.21233/n3194z	Neotoma (last access: 1 April 2021)	1737	1795	Nevado Sabancaya	-16.2167	-71.0833	4300	South America	Lake	Raw	9	AWI	3	8560	10918	294.8	2358
NEVILLE	NEVILLE	NEVILLE	10.21233/n3gn0x	Neotoma (last access: 1 April 2021)	1738	1796	Neville Marsh	40.5458	-83.8333	305	North America	Peat	Raw	25	AWI	4	10577	18812	343.1	8235	Physiography: Till Plains.		Shane, L.C. and Anderson, K.H., 1993. Intensity, gradients and reversals in late glacial environmental change in east-central North America. Quaternary Science Reviews, 12(5), pp.307-320.	https://doi.org/10.1016/0277-3791(93)90039-O
NILIQ	NILIQ	NILIQ	10.21233/n3fn0m	Neotoma (last access: 1 April 2021)	1748	1806	Niliq Lake	67.8667	-160.433	274	North America	Lake	Raw	42	AWI	5	1385	17029	381.6	15644	Lake of unknown origin, glac. topography. Physiography: low rolling hills. Surrounding vegetation: birch-alder shrub tundra.	1984-08-01 00:00:00	Anderson, P.M., 1988. Late Quaternary pollen records from the Kobuk and Noatak River drainages, northwestern Alaska. Quaternary Research, 29(3), pp.263-276.	https://doi.org/10.1016/0033-5894(88)90035-X
NINA	NINA	NINA	10.21233/n39x6d	Neotoma (last access: 1 April 2021)	1749	1807	Nina Lake	46.6	-81.5	380	North America	Lake	Raw	60	AWI	3	-31	11821	200.9	11852	Small lake in rock basin. Surrounding vegetation: Pinus/Betula/Abies/Populus/Acer.		Liu, K.B., 1990. Holocene paleoecology of the boreal forest and Great Lakes-St. Lawrence forest in northern Ontario. Ecological Monographs, 60(2), pp.179-212.	https://doi.org/10.2307/1943044
Nizmennyii_Cape	Nizmennyii_Cape	NIZMENYI	10.21233/n3644s	Neotoma (last access: 1 April 2021)	1751	1809	Cape Nizmennyii Exposure C3352	49.1667	142.017	5	Asia	Coast	Raw	9	AWI	2	371	8786	1051.9	8415	Exposure of lake, lagoon, beach deposits. Physiography: dissected coastal plain. Surrounding vegetation: Picea-Abies forest.	1987-08-23 00:00:00	Anderson, P.M. and Lozhkin, A.V., 2002. Late Quaternary Vegetation and Climate of Siberia and the Russian Far East (Palynological and Radiocarbon Database). North East Science Center, Far East Branch, Russian Academy of Sciences, Magadan, Russia.		Korotky, A., Grebennikova, T., Razjigaeva, N., Volkov, V., Mokhova, L., Ganzey, L. and Bazarova, V., 1997. Marine terraces of western Sakhalin Island. Catena, 30(1), pp.61-81.	https://doi.org/10.1016/S0341-8162(97)00002-7	Korotkiy, A.M., Pushkar, V.S., Grebennikova, T.A., Razzhigaeva, N.G., Karaulova, L.P., Mokhova, L.M., Ganzey, L.A., Cherepanova, M.N., Bazarova, V.B., Volkov, V.G. and Kovalyukhand, N.N., 1997. Marine terraces and Quaternary history of the Sakhalin Shelf. Dal'nauka, Vladivostok (in Russian).
NIZVAR	NIZVAR	NIZVAR	10.21233/n32f38	Neotoma (last access: 1 April 2021)	1752	1810	Nizhnevartovskoye Exposure	61.25	77	55	Asia	Peat	Raw	33	AWI	14	117	12594	389.9	12477	Peat overlying 1st river terrace. Physiography: river valley. Surrounding vegetation: Picea, Abies, Pinus.		Anderson, P.M. and Lozhkin, A.V., 2002. Late Quaternary Vegetation and Climate of Siberia and the Russian Far East (Palynological and Radiocarbon Database). North East Science Center, Far East Branch, Russian Academy of Sciences, Magadan, Russia.		Firsov, L.V., Panychev, V.A. and Orlova, L.A., 1985. Catalog of radiocarbon dates. Novosibirsk Geological Institute, Siberian Branch, USSR Academy of Sciences, Novosibirsk (in Russian).		Il'ina, N.S., Lapshina, E.I. and Lavrenko, N.I., 1985. The vegetation cover of the western Siberia continental plateau. Nauka, Siberia Branch, Novosibirsk (in Russian).		Neishtadt, M.I., 1976. Holocene processes in western Siberia and associated problems. In: Studying and mastering the environment ed. by M.I. Neishtadt (pp.90-99). USSR Academy of Sciences, Institute of Geography, Moscow (in Russian).
NOBOTTOM	NOBOTTOM	NOBOTTOM	10.21233/n3jf27	Neotoma (last access: 1 April 2021)	1756	1814	No Bottom Pond	41.2833	-70.2083	6	North America	Lake	Raw	48	AWI	5	-46	16852	359.5	16898	Kettle lake. Physiography: rolling morainic. Surrounding vegetation: heathland (anthropogenic).		Dunwiddie, P.W., 1990. Postglacial vegetation history of coastal islands in southeastern New-England. National Geographic Research, 6(2), pp.178-195.
NONCONN1	NONCONN1	NONCONN1	10.21233/n3dn1p	Neotoma (last access: 1 April 2021)	1757	1815	Nonconnah Creek [TN-1]	35.0833	-89.9167	76	North America	Alluvial/Fluvial	Raw	15	AWI	5	16439.5	25085	617.5	8645.5			Delcourt, P.A., Delcourt, H.R., Brister, R.C. and Lackey, L.E., 1980. Quaternary vegetation history of the Mississippi embayment. Quaternary Research, 13(1), pp.111-132.	https://doi.org/10.1016/0033-5894(80)90086-1
NORTHPND	NORTHPND	NORTHPND	10.21233/n38x63	Neotoma (last access: 1 April 2021)	1759	1817	North Pond	42.6517	-73.0534	586	North America	Lake	Raw	55	AWI	13	-17	13151	243.9	13168		1973-11-01 00:00:00	Huvane, J.K. and Whitehead, D.R., 1996. The paleolimnology of North Pond: watershed-lake interactions. Journal of Paleolimnology, 16(3), pp.323-354.	https://doi.org/10.1007/BF00207576	Whitehead, D.R. and Crisman, T.L., 1978. Paleolimnological studies of small New England (U.S.A.) ponds. Part I. Late-glacial and postglacial trophic oscillations. Polskie Archiwum Hydrobiologii, 25, pp.471-481.
NUTTLAKE	NUTTLAKE	NUTTLAKE	10.21233/n39m01	Neotoma (last access: 1 April 2021)	1762	1820	Nutt Lake	45.21	-79.45	305	North America	Lake	Raw	83	AWI	10	-34	11021	134.8	11055	Glacial scour/kettle lake. Physiography: Canadian shield, rough and rocky. Surrounding vegetation: hemlock, maple, birch, beech forest.	1984-02-01 00:00:00	Bennett, K.D., 1987. Holocene history of forest trees in southern Ontario. Canadian Journal of Botany, 65(9), pp.1792-1801.	https://doi.org/10.1139/b87-248
OKOBOJI	OKOBOJI	OKOBOJI	10.21233/n3cq93	Neotoma (last access: 1 April 2021)	1766	1824	West Okoboji Lake	43.38	-95.16	426	North America	Lake	Raw	110	AWI	11	-18	16843	154.7	16861	Lake	1975-03-01 00:00:00	van Zant, K.L., 1979. Late glacial and postglacial pollen and plant macrofossils from Lake West Okoboji, northwestern Iowa. Quaternary Research, 12(3), pp.358-380.	https://doi.org/10.1016/0033-5894(79)90034-6
OLDFIELD	OLDFIELD	OLDFIELD	10.21233/n3475k	Neotoma (last access: 1 April 2021)	1768	1826	Old Field	37.1167	-89.8333	97	North America	Peat	Raw	24	AWI	6	3940	10523	286.2	6583	Morehouse Lowland, bottomland depression. Physiography: Mississppi River bottom. Surrounding vegetation: canebrakes and bottomland swamp forest.	1974-06-01 00:00:00	King, J.E., 1981. Late Quaternary vegetational history of Illinois. Ecological Monographs, 51(1), pp.43-62.	https://doi.org/10.2307/2937306	King, J.E. and Allen Jr, W.H., 1977. A Holocene vegetation record from the Mississippi River Valley, southeastern Missouri. Quaternary Research, 8(3), pp.307-323.	https://doi.org/10.1016/0033-5894(77)90074-6
OLIVER	OLIVER	OLIVER	10.21233/n38m0q	Neotoma (last access: 1 April 2021)	1770	1829	Oliver Pond	48.4222	-89.3239	250	North America	Lake	Raw	35	AWI	3	14	14147	415.7	14133	Shallow lake of glacial origin. Physiography: Lake Superior Basin.		Julig, P.J., McAndrews, J.H. and Mahaney, W.C., 1990. Geoarchaeology of the Cummins site on the beach of proglacial Lake Minong, Lake Superior Basin, Canada. In: Archaeological Geology of North America ed. by N.P. Lasca and J. Donahue (pp.21-50). Centennial Special Volume 4, Geological Society of America, Boulder, Colorado, USA.
ONDRISPD	ONDRISPD	ONDRISPD	10.21233/n3136n	Neotoma (last access: 1 April 2021)	1772	1831	Ondris Pond	46.3416	-94.408	363	North America	Lake	Raw	32	AWI	2	-28	1347	44.4	1375	Depression in Crow Wing outwash plain. Physiography: little relief. Surrounding vegetation: oak woods.	1974-03-01 00:00:00	Jacobson Jr, G.L., 1975. A palynological study of the history and ecology of white pine in Minnesota. Doctoral dissertation. University of Minnesota, Minneapolis, Minnesota, USA.		Bender, M.M., Bryson, R.A. and Baerreis, D.A., 1977. University of Wisconsin radiocarbon dates XIV. Radiocarbon, 19(1), pp.127-137.	https://doi.org/10.1017/S0033822200003404	Jacobson Jr, G.L., 1979. The palaeoecology of white pine (Pinus strobus) in Minnesota. Journal of Ecology, 67(2), pp.697-726.	https://doi.org/10.2307/2259121
Opasnaya_River	Opasnaya_River	OPAS10	10.21233/n3cd3q	Neotoma (last access: 1 April 2021)	1777	1836	Headwaters Opasnaya River	48.2333	138.483	1320	Asia	Peat	Raw	18	AWI	11	5660	61455	3282.1	55795	Raised peat. Physiography: oligotrophic peatland with frost mounds. Surrounding vegetation: sparse Picea forest and mountain tundra.	1982-04-10 00:00:00	Anderson, P.M. and Lozhkin, A.V., 2002. Late Quaternary Vegetation and Climate of Siberia and the Russian Far East (Palynological and Radiocarbon Database). North East Science Center, Far East Branch, Russian Academy of Sciences, Magadan, Russia.		Korotky, A.M., Pletnev, S.P., Pushkar, V.S., Grebennikova, T.A., Razzhigaeva, N.G., Sakhebgareeva, E.D. and Mokhova, L.M. 1988. Evolution environment of south Far East (late Pleistocene and Holocene). Nauka, Moscow (in Russian).
OPASMS	OPASMS	OPASMS	10.21233/n37q0f	Neotoma (last access: 1 April 2021)	1778	1837	Headwaters Opasnaya River (mine shaft)	48.2333	138.483	1320	Asia	Alluvial/Fluvial	Raw	13	AWI	2	4652	7595	245.2	2943	Section exposed in mine shaft. Physiography: upper portion of river valley. Surrounding vegetation: mixed mountain tundra and Picea forest.	1982-09-07 00:00:00	Anderson, P.M. and Lozhkin, A.V., 2002. Late Quaternary Vegetation and Climate of Siberia and the Russian Far East (Palynological and Radiocarbon Database). North East Science Center, Far East Branch, Russian Academy of Sciences, Magadan, Russia.		Korotky, A.M., 1982. Paleographic conditions of the formation of Quaternary peats (south of Far East). In: Modern sedimentation and morpholithogenesis of the Far East ed. by S.P. Pletnev and V.S. Pushkar (pp.58-71). Far Eastern Science Center, USSR Academy of Sciences, Vladivostok (in Russian).		Korotky, A.M., Mokhova, L.M. and Pushkar, V.S., 1985. The climate changes of the Holocene and landscape evolution of bald mountains of central Yam-Alin'. In: Paleogeographic investigations in the Far East ed. by A.M. Korotky and V.S. Pushkar (pp.5-22). Far Eastern Science Center of the USSR Academy of Sciences, Vladivostok (in Russian).		Korotky, A.M., Pletnev, S.P., Pushkar, V.S., Grebennikova, T.A., Razzhigaeva, N.G., Sakhebgareeva, E.D. and Mokhova, L.M. 1988. Evolution environment of south Far East (late Pleistocene and Holocene). Nauka, Moscow (in Russian).
OTTOMLK	OTTOMLK	OTTOMLK	10.21233/n30650	Neotoma (last access: 1 April 2021)	1781	1840	Otto Mielke Lake	45.9248	-89.6259	495	North America	Lake	Raw	13	AWI	11	-14	150.2	13.7	164.2		1984-02-06 00:00:00	Charles, D.F. and Whitehead, D.R., 1984. Paleoecological Investigation of Recent Lake Acidification (PIRLA): December 1984 Status Report. RP 2174-10, Electric Power Research Institute, Palo Alto, CA.		Charles, D.F. and Whitehead, D.R., 1986. Paleoecological Investigation of Recent Lake Acidification (PIRLA): Methods and Project Description. EPRI EA-4906, Electric Power Research Institute, Palo Alto, CA.		Shane, L.C., 1987. Northern Great Lakes States pollen and charcoal data. PIRLA Unpublished Report Series 9, Indiana University, Bloomington, IN.		Kingston, J.C., Cook, R.B., Kreis, R.G., Camburn, K.E., Norton, S.A., Sweets, P.R., Binford, M.W., Mitchell, M.J., Schindler, S.C., Shane, L.C.K. and King, G.A., 1990. Paleoecological investigation of recent lake acidification in the northern Great Lakes states. Journal of Paleolimnology, 4(2), pp.153-201.	https://doi.org/10.1007/BF00226322
OUEL	OUEL	OUEL	10.21233/n3fj1z	Neotoma (last access: 1 April 2021)	1782	1841	Lac Ouellet	47.5328	-68.9439	300	North America	Lake	Raw	33	AWI	4	50	14838	462.1	14788	Rock basin. Physiography: coastal estuarine plateau, undulating. Surrounding vegetation: Betulo luteae - Aceretum sacchari.	1978-01-01 00:00:00	Richard, P., Larouche, A. and Lortie, G., 1992. Paleophytogeographie et paleoclimats postglaciaires dans l'ouest du Bas-Saint-Laurent, Quebec. Geographie physique et Quaternaire, 46(2), pp.151-172 (in French).	https://doi.org/10.7202/032900ar
Oumi	Oumi	OUMI	10.21233/n39q9g	Neotoma (last access: 1 April 2021)	1783	1842	Oumi Exposure	48.2167	138.4	990	Asia	Peat	Raw	29	AWI	5	277	2786	89.6	2509	Lake formed by naturally dammed river. Physiography: river valley. Surrounding vegetation: bog with Larix.	1981-06-16 00:00:00	Anderson, P.M. and Lozhkin, A.V., 2002. Late Quaternary Vegetation and Climate of Siberia and the Russian Far East (Palynological and Radiocarbon Database). North East Science Center, Far East Branch, Russian Academy of Sciences, Magadan, Russia.
OVRA1	OVRA1	OVRA1	10.21233/n3616h	Neotoma (last access: 1 April 2021)	1784	1843	Ovrazhnyii-1 Stream Exposure	43.25	134.567	8	Asia	Alluvial/Fluvial	Raw	36	AWI	13	203	45547	1295.5	45344	Exposure in river terrace. Physiography: coastal zone bordering gulf. Surrounding vegetation: Quercus mongolica-Betula forest.	1986-06-15 00:00:00	Anderson, P.M. and Lozhkin, A.V., 2002. Late Quaternary Vegetation and Climate of Siberia and the Russian Far East (Palynological and Radiocarbon Database). North East Science Center, Far East Branch, Russian Academy of Sciences, Magadan, Russia.		Korotky, A.M. and Karaulova, L.P., 1975. New data about the stratigraphy of Quaternary deposits of Primor'ye. In: Questions of geomorphology and Quaternary geology of the southern Far East ed. by A.M. Korotky and A.P. Kulakov (pp.79-110). Far Eastern Branch, USSR Academy of Sciences, Vladivostok (in Russian).		Korotky, A.M., Karaulova, L.P. and Troitskaya, T.S., 1980. The Quaternary deposits of Primor'ye. Nauka, Novosibirsk (in Russian).		Korotky, A.M., Kovalyukh, N.N. and Volkov, V.G., 1989. Radiocarbon dating of Quaternary deposits (south Far East). Preprint. Far East Branch of the USSR Academy of Sciences, Vladivostok (in Russian).		Shilo, N.A., 1987. Resolution: Interagency Stratigraphic meeting of Quaternary system of eastern USSR. North East Interdisciplinary Research Institute, Far East Branch, USSR Academy of Sciences, Magadan (in Russian).
Ovrazhnyii_Stream-2	Ovrazhnyii_Stream-2	OVRA2	10.21233/n32736	Neotoma (last access: 1 April 2021)	1785	1844	Ovrazhnyii-2 Exposure 667-842	43.25	134.567	10	Asia	Peat	Raw	16	AWI	4	822	35984	2344.1	35162	Exposure of lake and bog sediments. Physiography: sea coast. Surrounding vegetation: Larix-Alnus-Betula forest with bogs.	1971-04-15 00:00:00	Anderson, P.M. and Lozhkin, A.V., 2002. Late Quaternary Vegetation and Climate of Siberia and the Russian Far East (Palynological and Radiocarbon Database). North East Science Center, Far East Branch, Russian Academy of Sciences, Magadan, Russia.		Korotky, A.M. and Karaulova, L.P., 1975. New data about the stratigraphy of Quaternary deposits of Primor'ye. In: Questions of geomorphology and Quaternary geology of the southern Far East ed. by A.M. Korotky and A.P. Kulakov (pp.79-110). Far Eastern Branch, USSR Academy of Sciences, Vladivostok (in Russian).		Pushkar, V.S., 1979. Biostratigraphy of sediments of the late Anthropogene of the southern Far East. Nauka, Moscow (in Russian).
OZERKI	OZERKI	OZERKI	10.21233/n3bd3d	Neotoma (last access: 1 April 2021)	1786	1845	Ozerki	50.4167	80.4667	227	Asia	Alluvial/Fluvial	Raw	48	AWI	10	-42	15294	326.3	15336	Swamp. Physiography: Irtish River valley. Surrounding vegetation: birch-poplar forests and cultivated fields.	1990-08-01 00:00:00	Tarasov, P.E., Harrison, S.P., Saarse, L., Pushenko, M.Y., Andreev, A.A., Aleshinskaya, Z.V., Davydova, N.N., Dorofeyuk, N.I., Efremov, Y.V., Khomutova, V.I., Sevastyanov, D.V., Tamosaitis, J., Uspenskaya, O.N., Yakushko, O.F. and Tarasova, I.V., 1994. Lake status records from the former Soviet Union and Mongolia: data base documentation. Paleoclimatology Publications Series 2, World Data Center-…		Kremenetsky, C.V., Tarasov, P.E. and Cherkinsky, A.E., 1994. Istoriya ostrovnykh borov Kazakhstana v golotsene [Holocene history of the Kazakhstan "island" pine forests]. Botanicheskiy Zhurnal, 79(3), pp.13-29 (in Russian).		Kremenetski, C.V., Tarasov, P.E. and Cherkinsky, A.E., 1997. Postglacial development of Kazakhstan pine forests. Geographie physique et Quaternaire, 51(3), pp.391-404.	https://doi.org/10.7202/033138ar	Tarasov, P.E. and Kremenetskii, C.V., 1995. Geochronology and stratigraphy of the Holocene lacustrine-bog deposits in northern and central Kazakhstan. Stratigraphy and Geological Correlation, 3(1), pp.73-80.		Tarasov, P.E., Jolly, D. and Kaplan, J.O., 1997. A continuous Late Glacial and Holocene record of vegetation changes in Kazakhstan. Palaeogeography, Palaeoclimatology, Palaeoecology, 136(1-4), pp.281-292.	https://doi.org/10.1016/S0031-0182(97)00072-2	Tarasov, P., 1996. Lake Status Records from the Former Soviet Union and Mongolia: Documentation of the Second Version of the Databases (No. 5). Paleoclimatology Publications Series Report No. 2, World Data Center-A for Paleoclimatology, NOAA Paleoclimatology Program, Boulder, Colorado, USA.
PALACE	PALACE	PALACE	10.21233/n32w8n	Neotoma (last access: 1 April 2021)	1788	1847	Palace Pier Section	43.62	-79.48	73	North America	Coast	Raw	11	AWI	2	629	1020	39.1	391
PARADISE	PARADISE	PARADISE	10.21233/n3dj08	Neotoma (last access: 1 April 2021)	1790	1849	Paradise Lake	53.05	-57.75	180	North America	Lake	Raw	17	AWI	3	168	11928	735	11760	Shallow lake in are of low relief. Physiography: Mecatina Plateau/Laurentian region. Surrounding vegetation: black spruce.	1977-01-01 00:00:00	Lamb, H.F., 1978. Post-glacial vegetation change in southeastern Labrador. Master's thesis. University of Minnesota, Minneapolis, Minnesota, USA.		Lamb, H.F., 1980. Late Quaternary vegetational history of southeastern Labrador. Arctic and Alpine research, 12(2), pp.117-135.	https://doi.org/10.1080/00040851.1980.12004172
Paramonovskii_Stream	Paramonovskii_Stream	PARAMON	10.21233/n38q95	Neotoma (last access: 1 April 2021)	1791	1850	Paramonovskii Stream Exposure 4980	43.2	133.75	120	Asia	Alluvial/Fluvial	Raw	7	AWI	3	692	42075	6897.2	41383	River terrace. Physiography: river valley. Surrounding vegetation: broadleaf-Pinus koraiensis forest.	1989-09-20 00:00:00	Anderson, P.M. and Lozhkin, A.V., 2002. Late Quaternary Vegetation and Climate of Siberia and the Russian Far East (Palynological and Radiocarbon Database). North East Science Center, Far East Branch, Russian Academy of Sciences, Magadan, Russia.		Korotky, A.M., Karaulova, L.P. and Troitskaya, T.S., 1980. The Quaternary deposits of Primor'ye. Nauka, Novosibirsk (in Russian).		Korotky, A.M., Volkov, V.G., Bazarova, V.B. and Kovalyukh, N.N., 1993. The catalog of radiocarbon dates of Quaternary deposits of the Far East. Far Eastern Branch, Russian Academy of Sciences, Vladivostok (in Russian).		Shilo, N.A., 1987. Resolution: Interagency Stratigraphic meeting of Quaternary system of eastern USSR. North East Interdisciplinary Research Institute, Far East Branch, USSR Academy of Sciences, Magadan (in Russian).
PARK1	PARK1	PARK1	10.21233/n3175n	Neotoma (last access: 1 April 2021)	1792	1852	Park Pond 1	43.4681	-109.959	2705	North America	Lake	Raw	23	AWI	2	151	5173	228.3	5022	Kettle pond. Physiography: high plateau in Wind River Range. Surrounding vegetation: Artemisia grassland (Fish Creek Park).		Lynch, E.A., 1995. Origin of a park-forest vegetation mosaic in the Wind River Range, Wyoming. Doctoral dissertation. University of Minnesota, Minneapolis, Minnesota, USA.		Lynch, E.A., 1998. Origin of a park-forest vegetation mosaic in the Wind River Range, Wyoming. Ecology, 79(4), pp.1320-1338.	https://doi.org/10.1890/0012-9658(1998)079[1320:OOAPFV]2.0.CO;2
PARK2	PARK2	PARK2	10.21233/n35q0t	Neotoma (last access: 1 April 2021)	1793	1854	Park Pond 2	43.45	-109.941	2714	North America	Lake	Raw	30	AWI	4	-56	12075	418.3	12131	Kettle pond. Physiography: high plateau in Wind River Range. Surrounding vegetation: Artemisia grassland (Fish Creek Park).		Lynch, E.A., 1995. Origin of a park-forest vegetation mosaic in the Wind River Range, Wyoming. Doctoral dissertation. University of Minnesota, Minneapolis, Minnesota, USA.		Lynch, E.A., 1998. Origin of a park-forest vegetation mosaic in the Wind River Range, Wyoming. Ecology, 79(4), pp.1320-1338.	https://doi.org/10.1890/0012-9658(1998)079[1320:OOAPFV]2.0.CO;2
PARK3	PARK3	PARK3	10.21233/n3hb38	Neotoma (last access: 1 April 2021)	1794	1856	Park Pond 3	43.4592	-109.92	2739	North America	Lake	Raw	36	AWI	4	392	12328	341	11936	Kettle pond. Physiography: high plateau in Wind River Range. Surrounding vegetation: Artemisia grassland (Fish Creek Park).		Lynch, E.A., 1995. Origin of a park-forest vegetation mosaic in the Wind River Range, Wyoming. Doctoral dissertation. University of Minnesota, Minneapolis, Minnesota, USA.		Lynch, E.A., 1998. Origin of a park-forest vegetation mosaic in the Wind River Range, Wyoming. Ecology, 79(4), pp.1320-1338.	https://doi.org/10.1890/0012-9658(1998)079[1320:OOAPFV]2.0.CO;2
PARKHILL	PARKHILL	PARKHILL	10.21233/n3cj1b	Neotoma (last access: 1 April 2021)	1795	1857	Parkhill Creek	43.18	-81.75	181	North America	Peat	Raw	37	AWI	4	-52	13966	389.4	14018
PASACACO	PASACACO	PASACACO	10.21233/n3415h	Neotoma (last access: 1 April 2021)	1797	1859	Pasacaco Pond	41.51	-71.45	3	North America	Lake	Raw	50	AWI	3	4	1135	23.1	1131
PASHENN	PASHENN	PASHENN	10.21233/n30b3m	Neotoma (last access: 1 April 2021)	1798	1860	Pashennoe	49.3677	75.3986	871	Asia	Lake	Raw	34	AWI	9	-49	13295	404.4	13344	Tectonic basin, lake with floating bogs. Physiography: Karkaralinsk Mtns, granite hills, 1000 m. Surrounding vegetation: Betula, Pinus, steppe.	1990-01-01 00:00:00	Tarasov, P.E., Harrison, S.P., Saarse, L., Pushenko, M.Y., Andreev, A.A., Aleshinskaya, Z.V., Davydova, N.N., Dorofeyuk, N.I., Efremov, Y.V., Khomutova, V.I., Sevastyanov, D.V., Tamosaitis, J., Uspenskaya, O.N., Yakushko, O.F. and Tarasova, I.V., 1994. Lake status records from the former Soviet Union and Mongolia: data base documentation. Paleoclimatology Publications Series 2, World Data Center-…		Kremenetsky, C.V., Tarasov, P.E. and Cherkinsky, A.E., 1994. Istoriya ostrovnykh borov Kazakhstana v golotsene [Holocene history of the Kazakhstan "island" pine forests]. Botanicheskiy Zhurnal, 79(3), pp.13-29 (in Russian).		Tarasov, P.E. and Kremenetskii, K.V., 1995. Geochronology and stratigraphy of the Holocene lacustrine-bog deposits in northern and central Kazakhstan. Stratigraphy and Geological Correlation, 3(1), pp.73-80.		Tarasov, P., 1996. Lake Status Records from the Former Soviet Union and Mongolia: Documentation of the Second Version of the Databases (No. 5). Paleoclimatology Publications Series Report No. 2, World Data Center-A for Paleoclimatology, NOAA Paleoclimatology Program, Boulder, Colorado, USA.
PASSLAKE	PASSLAKE	PASSLAKE	10.21233/n34p9k	Neotoma (last access: 1 April 2021)	1800	1862	Pass Lake	48.56	-88.74	250	North America	Lake	Raw	50	AWI	5	-63	12102	248.3	12165	Scour lake dammed by L. Minong beech bar. Physiography: Lake Superior basin.		McAndrews, J.H., 1986. 12,000 years of change - and it's not done yet! Thunder Bay Field Naturalists' Newsletter 40, pp.2-7.
PATRICIA	PATRICIA	PATRICIA	10.21233/n31070	Neotoma (last access: 1 April 2021)	1802	1864	Lac Patricia	56.67	-64.68	538	North America	Lake	Raw	40	AWI	2	-6	6384	163.8	6390			Samson, G., 1983. Prehistorie du Mushuau Nipi, Nouveau-Quebec: etude du mode d'adaptation a l'interier des terres hemi-arctiques. Doctoral dissertation. University of Toronto, Toronto, Ontario, Canada.
PATZCUAR	PATZCUAR	PATZCUAR	10.21233/n3bj2d	Neotoma (last access: 1 April 2021)	1804	1866	Lake Patzcuaro	19.5833	-101.583	2044	North America	Lake	Raw	64	AWI	7	22	47882	759.7	47860	Lake dammed by basalt flow. Physiography: volcanic mountains. Surrounding vegetation: secondary pine-oak woodland.	1973-01-01 00:00:00	Deevey Jr, E.S., 1944. Pollen analysis and Mexican archaeology: an attempt to apply the method. American Antiquity, 10(2), pp.135-149.	https://doi.org/10.2307/275110	Hutchinson, G.E., Patrick, R. and Deevey, E.S., 1956. Sediments of Lake Patzcuaro, Michoacan, Mexico. Geological Society of America Bulletin, 67(11), pp.1491-1504.	https://doi.org/10.1130/0016-7606(1956)67[1491:SOLPMM]2.0.CO;2	Watts, W.A. and Bradbury, J.P., 1982. Paleoecological studies at Lake Patzcuaro on the west-central Mexican Plateau and at Chalco in the Basin of Mexico. Quaternary Research, 17(1), pp.56-70.	https://doi.org/10.1016/0033-5894(82)90045-X	Saporito, M.S., 1975. Chemical and mineral studies of a core from Lake Patzcuaro, Mexico. Master's thesis. University of Minnesota, Minneapolis, Minnesota, USA.
PAVLOVKA	PAVLOVKA	PAVLOVKA	10.21233/n36t86	Neotoma (last access: 1 April 2021)	1805	1867	Pavlovka Exposure 988	44.3167	134	300	Asia	Alluvial/Fluvial	Raw	16	AWI	2	1832	47908	3071.7	46076	Exposure in fluvial terrace. Physiography: river valley in mountains. Surrounding vegetation: valley coniferous-broadleafed forest.	1971-09-20 00:00:00	Anderson, P.M. and Lozhkin, A.V., 2002. Late Quaternary Vegetation and Climate of Siberia and the Russian Far East (Palynological and Radiocarbon Database). North East Science Center, Far East Branch, Russian Academy of Sciences, Magadan, Russia.		Korotky, A.M., Karaulova, L.P. and Troitskaya, T.S., 1980. The Quaternary deposits of Primor'ye. Nauka, Novosibirsk (in Russian).
PAYNTER	PAYNTER	PAYNTER	10.21233/n3317z	Neotoma (last access: 1 April 2021)	1806	1868	Paynter Marsh	44.1	-78.34	188	North America	Peat	Raw	19	AWI	6	-56	13151	733.7	13207	Swamp. Physiography: drumlinized till plain. Surrounding vegetation: eastern white cedar hardwood swamp.	1991-08-01 00:00:00	Jackson, L.J. and McKillop, H., 1991. New fossil records for the Rice Lake region. Arch Notes, 91(5), pp.12-16.		Yu, Z., 1992. Postglacial water levels at Rice Lake, Ontario: sediment, pollen, and plant macrofossil evidence. Doctoral dissertation. University of Toronto, Toronto, Ontario, Canada.		Yu, Z., McAndrews, J.H. and Siddiqi, D., 1996. Influences of Holocene climate and water levels on vegetation dynamics of a lakeside wetland. Canadian Journal of Botany, 74(10), pp.1602-1615.	https://doi.org/10.1139/b96-194
PEATSAH	PEATSAH	PEATSAH	10.21233/n3b94r	Neotoma (last access: 1 April 2021)	1816	1879	Peatsah Section	43.33	-79.82	92	North America	Peat	Raw	8	AWI	4	7322	14728	1058	7406	Section along a small creek. Physiography: undulating to flat or plain like.		Roberts, A.C.B., 1985.Preceramic occupations along the north shore of Lake Ontario. Archeological Survey of Canada, 132, p.277.
PEDEN2	PEDEN2	PTOEDEN	10.21233/n36h1f	Neotoma (last access: 1 April 2021)	1817	1880	Puerto Edén	-49.1333	-74.4167	50	South America	Peat	Raw	24	AWI	3	-69	17344	757.1	17413	Bog behind moraines. Physiography: Chilean Channels. Surrounding vegetation: moorland/temp. rainforest.		Ashworth, A.C., Markgraf, V. and Villagran, C., 1991. Late Quaternary climatic history of the Chilean Channels based on fossil pollen and beetle analyses, with an analysis of the modern vegetation and pollen rain. Journal of Quaternary Science, 6(4), pp.279-291.	https://doi.org/10.1002/jqs.3390060403
PEDPOND	PEDPOND	PEDPOND	10.21233/n3j458	Neotoma (last access: 1 April 2021)	1818	1882	Ped Pond	67.2	-142.067	211	North America	Lake	Raw	32	AWI	6	-64	14819	480.1	14883	Ancient flood channel. Physiography: river terraces. Surrounding vegetation: spruce forest.	1982-07-01 00:00:00	Edwards, M.E. and Brubaker, L.B., 1986. Late quaternary vegetation history of the Fishhook Bend area, Porcupine River, Alaska. Canadian Journal of Earth Sciences, 23(11), pp.1765-1773.	https://doi.org/10.1139/e86-162
PEGGY	PEGGY	PEGGY	10.21233/n3db4q	Neotoma (last access: 1 April 2021)	1819	1883	Peggy Lake	49.48	-92	470	North America	Lake	Raw	47	AWI	3	-7	9578	208.4	9585
PENZHIN	PENZHIN	PENZHIN	10.21233/n34t8k	Neotoma (last access: 1 April 2021)	1821	1885	Penzhinskaya Gulf	62.4167	165.417	32	Asia	Peat	Raw	11	AWI	2	2689	9168	647.9	6479	Buried peat exposed in coastal bluff. Physiography: coastal. Surrounding vegetation: Betula-Alnus shrub tundra.		Anderson, P.M. and Lozhkin, A.V., 2002. Late Quaternary Vegetation and Climate of Siberia and the Russian Far East (Palynological and Radiocarbon Database). North East Science Center, Far East Branch, Russian Academy of Sciences, Magadan, Russia.		Ivanov, V.F., Lozhkin, A.V., Kal'nichenko, S.S., Kyshtymov, A.I., Narkhinova, V.E. and Terekhova, V.E., 1984. The late Pleistocene and Holocene of Chukchi Peninsula to the north of Kamchatka. In: Geology and useful minerals of northeast Asia ed. by V.I. Goncharov (pp.33-42). Far East Branch, USSR Academy of Sciences, Vladivostok (in Russian).
PEPELNOY	PEPELNOY	PEPELNOY	10.21233/n3145m	Neotoma (last access: 1 April 2021)	1822	1886	Pepel'noye Lake	59.85	150.617	115	Asia	Lake	Raw	24	AWI	2	-17	4398	192	4415	Lake. Physiography: tectonic depression. Surrounding vegetation: Larix dahurica forest.	1993-09-19 00:00:00	Anderson, P.M. and Lozhkin, A.V., 2002. Late Quaternary Vegetation and Climate of Siberia and the Russian Far East (Palynological and Radiocarbon Database). North East Science Center, Far East Branch, Russian Academy of Sciences, Magadan, Russia.		Lozhkin, A.V., Anderson, P.M., Belaya, B.V., Glushkova, O.Y., Kotova, L.N. and Trumpe, M.A., 2000. Palynological characteristics and radiocarbon dates from late Holocene lacustrine sediments of northern Priokhot'ye. In: The Quaternary period of Beringia ed. by K.V. Simakov (pp.76-87). North East Interdisciplinary Research Institute, Far East Branch, Russian Academy of Sciences, Magadan (in Russia…
PERCHDUC	PERCHDUC	PERCHDUC	10.21233/n3994f	Neotoma (last access: 1 April 2021)	1824	1888	Perch Lake	51.6514	-100.899	701	North America	Lake	Raw	45	AWI	3	-18	6096	139	6114	Small kettle lake. Physiography: Duck Mountain, Manitoba Escarpment. Surrounding vegetation: Picea, Populus.	1971-04-06 00:00:00
PESCHANK	PESCHANK	PESCHANK	10.21233/n35m15	Neotoma (last access: 1 April 2021)	1825	1889	Peschanka Exposure 155	43.3	132.117	12	Asia	Alluvial/Fluvial	Raw	17	AWI	3	10406	42103	1981.1	31697	River terrace. Physiography: river valley. Surrounding vegetation: Quercus-Abies holophylla-Carpinus forest.	1982-10-10 00:00:00	Anderson, P.M. and Lozhkin, A.V., 2002. Late Quaternary Vegetation and Climate of Siberia and the Russian Far East (Palynological and Radiocarbon Database). North East Science Center, Far East Branch, Russian Academy of Sciences, Magadan, Russia.
PETEL	PETEL	PETEL	10.21233/n31s9p	Neotoma (last access: 1 April 2021)	1826	1890	Lac Petel	50.56	-66.29	270	North America	Lake	Raw	28	AWI	5	19	8769	324.1	8750	Steep slopes, rugged terrain. Physiography: lake shore slopes steeply, Laurentide M. Surrounding vegetation: balsam fir, black spruce.	1982-07-01 00:00:00	King, G.A., 1986. Deglaciation and vegetation history of western Labrador and adjacent Quebec. Doctoral dissertation. University of Minnesota, Minneapolis, Minnesota, USA.
PETERSL	PETERSL	PETERSL	10.21233/n3h45z	Neotoma (last access: 1 April 2021)	1827	1891	Peterson Slough	46.9667	-95.3167	460	North America	Lake	Raw	14	AWI	2	-40	3658	284.5	3698	Typha marsh with 1 ha open water. Physiography: Park Rapids Outwash Plain. Surrounding vegetation: Pinus banksiana/Quercus forest.	1981-02-16 00:00:00	Almendinger, J.C., 1992. The late Holocene history of prairie, brush-prairie, and jack pine (Pinus banksiana) forest on outwash plains, north-central Minnesota, USA. The Holocene, 2(1), pp.37-50.	https://doi.org/10.1177/095968369200200105	Almendinger, J.C., 1985. The late-Holocene development of jack pine forests on outwash plains, north-central Minnesota. Doctoral dissertation. University of Minnesota, Minneapolis, Minnesota, USA.
PGRANDE	PGRANDE	PGRANDE	10.21233/n3cf32	Neotoma (last access: 1 April 2021)	1828	1892	Poço Grande	-26.4167	-48.8667	10	South America	Lake	Raw	41	AWI	4	-39	5698	143.4	5737	Deposits of lake sediments and peat bog. Physiography: coastal lowland. Surrounding vegetation: Atlantic lowland rain forest.	1989-10-12 00:00:00	Behling, H., 1993. Untersuchungen zur spatpleistozanen und holozanen Vegetations- und Klimageschichte der tropischen Kustenwalder und der Araukarienwalder in Santa Catarina (Sudbrasilien). Dissertationes Botanicae 206. J Cramer, Berlin Stuttgart, Germany (in German).		Behling, H., 1995. Investigations into the Late Pleistocene and Holocene history of vegetation and climate in Santa Catarina (S Brazil). Vegetation History and Archaeobotany, 4(3), pp.127-152.	https://doi.org/10.1007/BF00203932
PIEDRABL	PIEDRABL	PIEDRABL	10.21233/n33x9p	Neotoma (last access: 1 April 2021)	1830	1894	Paramo de Piedras Blancas	9.16667	-70.8333	4080	South America	Peat	Raw	30	AWI	2	-44	1154	41.3	1198	Peat bog in superparamo vegetation. Physiography: glacial cirque. Surrounding vegetation: superparamo with Coespeletia.		Rull, V., Salgado-Labouriau, M.L., Schubert, C. and Valastro Jr, S., 1987. Late Holocene temperature depression in the Venezuelan Andes: Palynological evidence. Palaeogeography, palaeoclimatology, palaeoecology, 60, pp.109-121.	https://doi.org/10.1016/0031-0182(87)90027-7
PILOTMND	PILOTMND	PILOTMND	10.21233/n3893r	Neotoma (last access: 1 April 2021)	1833	1897	Pilot Mound Site	42.16	-93.9	352	North America	Lake	Raw	38	AWI	5	264	16344	434.6	16080		1984-09-01 00:00:00	Kim, H.K., 1986. Late-glacial and Holocene environment in central Iowa: a comparative study of pollen data from four sites. Doctoral dissertation. University of Iowa, Iowa City, Iowa, USA.
PINKLAKE	PINKLAKE	PINKLAKE	10.21233/n36n0f	Neotoma (last access: 1 April 2021)	1840	1904	Pink Lake	45.47	-75.81	162	North America	Lake	Raw	41	AWI	3	-33	13640	341.8	13673	Bedrock basin. Physiography: Canadian shield. Surrounding vegetation: Beech, Maple.	1973-03-07 00:00:00	Mott, R.J., 1978. Populus in late-Pleistocene pollen spectra. Canadian Journal of Botany, 56(8), pp.1021-1031.	https://doi.org/10.1139/b78-113	Mott, R.J. and Farley-Gill, L.D., 1981. Two late Quaternary pollen profiles from Gatineau Park, Quebec. Geological Survey of Canada Paper 80-31.
PIXIE	PIXIE	PIXIE	10.21233/n3c36r	Neotoma (last access: 1 April 2021)	1842	1906	Pixie Lake	48.6	-124.2	70	North America	Lake	Raw	108	AWI	8	19	16008	149.4	15989	Kettle lake. Physiography: San Juan River floodplain. Surrounding vegetation: hemlock, cedar, fir.	1995-01-01 00:00:00	Brown, K.J. and Hebda, R.J., 2002. Origin, development, and dynamics of coastal temperate conifer rainforests of southern Vancouver Island, Canada. Canadian Journal of Forest Research, 32(2), pp.353-372.	https://doi.org/10.1139/x01-197	Brown, K.J. and Hebda, R.J., 2003. Coastal rainforest connections disclosed through a Late Quaternary vegetation, climate, and fire history investigation from the Mountain Hemlock Zone on southern Vancouver Island, British Colombia, Canada. Review of Palaeobotany and Palynology, 123(3-4), pp.247-269.	https://doi.org/10.1016/S0034-6667(02)00195-1
POCTAY12	POCTAY12	POCTAY12	10.21233/n3c463	Neotoma (last access: 1 April 2021)	1894	1958	Canal de la Puntilla	-40.9525	-72.905	120	South America	Peat	Raw	16	AWI	10	14025.5	16362.5	155.8	2337	Fen in abandoned spillway. Physiography: Big moraines surrounding a flat surface. Surrounding vegetation: Farmland.	1992-02-19 00:00:00	Moreno, P.I., 1997. Vegetation and climate near Lago Llanquihue in the Chilean Lake District between 20200 and 9500 14C yr BP. Journal of Quaternary Science, 12(6), pp.485-500.	https://doi.org/10.1002/(SICI)1099-1417(199711/12)12:6<485::AID-JQS330>3.0.CO;2-4	Moreno, P.I., Lowell, T.V., Jacobson Jr, G.L. and Denton, G.H., 1999. Abrupt vegetation and climate changes during the last glacial maximumand last termination in the chilean lake district: a case study from canal de la puntilla (41 s). Geografiska Annaler: Series A, Physical Geography, 81(2), pp.285-311.	https://doi.org/10.1111/1468-0459.00059	Moreno, P.I., 1993. Vegetation and climate near Lago Llanquihue in the Chilean Lake District. Master's thesis. University of Maine, Orono, Maine, USA.
POLAND	POLAND	POLAND	10.21233/n3cs9s	Neotoma (last access: 1 April 2021)	1896	1961	Poland Spring Pond	44.0333	-70.35	94	North America	Lake	Raw	53	AWI	11	-53	15056	290.6	15109	Kettle lake in esker complex. Physiography: esker complex. Surrounding vegetation: white pine, northern hardwoods.	1981-03-01 00:00:00
PORPHYRY	PORPHYRY	PORPHYRY	10.21233/n3494w	Neotoma (last access: 1 April 2021)	1899	1964	Porphyry Lake	48.9072	-123.833	1100	North America	Lake	Raw	59	AWI	4	271	15699	266	15428	Physiography: Nanaimo Lakes and Highlands region. Surrounding vegetation: shore bog, forests of hemlock and fir.	1998-01-01 00:00:00	Brown, K.J. and Hebda, R.J., 2002. Origin, development, and dynamics of coastal temperate conifer rainforests of southern Vancouver Island, Canada. Canadian Journal of Forest Research, 32(2), pp.353-372.	https://doi.org/10.1139/x01-197	Brown, K.J. and Hebda, R.J., 2003. Coastal rainforest connections disclosed through a Late Quaternary vegetation, climate, and fire history investigation from the Mountain Hemlock Zone on southern Vancouver Island, British Colombia, Canada. Review of Palaeobotany and Palynology, 123(3-4), pp.247-269.	https://doi.org/10.1016/S0034-6667(02)00195-1
PORQUI2	PORQUI2	PORQUI2	10.21233/n30m1m	Neotoma (last access: 1 April 2021)	1900	1965	Porqui Pond	44.93	-79.78	188	North America	Lake	Raw	56	AWI	4	-10	16398	298.3	16408
PORTAGE_neotoma	PORTAGE_neotoma	PORTAGE	10.21233/n3ft9r	Neotoma (last access: 1 April 2021)	1901	1966	Portage Lake	47.081	-94.113	397	North America	Lake	Raw	64	AWI	3	-9	11785	187.2	11794	Kettle lake. Physiography: stagnation moraine, rolling.	1970-01-01 00:00:00
PORTAGE1	PORTAGE1	PORTAGE1	10.21233/n3b45d	Neotoma (last access: 1 April 2021)	1902	1967	Portage Marsh	41.5761	-87.2225	189	North America	Peat	Raw	21	AWI	4	307	15445	756.9	15138	Shallow marsh. Physiography: low relief ancestral lake bottom. Surrounding vegetation: Carex/Calamagrostis/Typha/Dulichium.	1991-06-01 00:00:00	Singer, D.K., Jackson, S.T., Madsen, B.J. and Wilcox, D.A., 1996. Differentiating climatic and successional influences on long-term development of a marsh. Ecology, 77(6), pp.1765-1778.	https://doi.org/10.2307/2265782
PORTAGEP	Portage	PORTAGEP	10.21233/n36b4v	Neotoma (last access: 1 April 2021)	1903	1968	Portage Bog	46.6736	-64.075	8	North America	Peat	Raw	71	AWI	3	-23	11811	169.1	11834	Raised Sphagnum bog. Physiography: gently rolling, Maritime Plain. Surrounding vegetation: spruce, maple, birch, hemlock.		Anderson, T.W., 1980. Holocene vegetation and climatic history of Prince Edward Island, Canada. Canadian Journal of Earth Sciences, 17(9), pp.1152-1165.	https://doi.org/10.1139/e80-122	Lowdon, J.A. and Blake, W., 1968. Geological Survey of Canada radiocarbon dates VII. Radiocarbon, 10(2), pp.207-245.	https://doi.org/10.1017/S0033822200010894
POSYET	POSYET	POSYET	10.21233/n32n06	Neotoma (last access: 1 April 2021)	1904	1969	Pos'yet Bay	42.6333	130.8	-19	Asia	Marine	Raw	29	AWI	9	296	9862	341.6	9566	Marine core on shallow shelf. Physiography: offshore shelf. Surrounding vegetation: none.	1980-09-10 00:00:00	Anderson, P.M. and Lozhkin, A.V., 2002. Late Quaternary Vegetation and Climate of Siberia and the Russian Far East (Palynological and Radiocarbon Database). North East Science Center, Far East Branch, Russian Academy of Sciences, Magadan, Russia.		Korotky, A.M., 1982. Oscillations of sea levels of the Sea of Japan during the Quaternary period (northwestern shelf). In: Oscillation of sea levels ed. by P.A. Kaplin, R.K. Klige, and A.L. Chepalyga (pp.104-114). Moscow State University, Moscow (in Russian).		Korotky, A.M. and Lobanova, L.A., 1984. Radiocarbon dating and paleographic boundaries of the late Pleistocene-Holocene. In: Paleogeograhic boundaries and methods for their study ed. by A.M. Korotky and V.S. Pushkar (pp.106-114). Far Eastern Science Center, USSR Academy of Sciences, Vladivostok (in Russian).		Korotky, A.M., Pletnev, S.P., Pushkar, V.S., Grebennikova, T.A., Razzhigaeva, N.G., Sakhebgareeva, E.D. and Mokhova, L.M., 1988. Evolution environment of south Far East (late Pleistocene and Holocene). Nauka, Moscow (in Russian).
POSYLAKE	POSYLAKE	POSYLAKE	10.21233/n3bs9g	Neotoma (last access: 1 April 2021)	1905	1970	Posy Lake	37.9375	-111.696	2653	North America	Lake	Raw	26	AWI	4	-32	9109	365.6	9141	Small lake on glacial deposits. Physiography: Aquarius plateau. Surrounding vegetation: transition zone between lower elevation pinyon-juniper forest and higher elevation Pinus ponderosa, Pseudotsuga menziesii, Populus tremuloides, and occasional Pinus edulis occur around the lake.		Shafer, D.S., 1989. The timing of late Quaternary monsoon precipitation maxima in the southwest United States. Doctoral dissertation. University of Arizona, Tucson, Arizona, USA.
POTTSMTN	POTTSMTN	POTTSMTN	10.21233/n3736h	Neotoma (last access: 1 April 2021)	1907	1972	Potts Mountain Pond	37.6	-80.1333	840	North America	Lake	Raw	22	AWI	5	935	13284	588	12349	Pond on ridge. Physiography: Appalachian mtns, Rose Hill Formation. Surrounding vegetation: Betula, Tsuga, Acer, Fagus, Tilia,.	1971-08-21 00:00:00	Bender, M.M., Baerreis, D.A. and Bryson, R.A., 1979. University of Wisconsin radiocarbon dates XVI. Radiocarbon, 21(1), pp.120-130.	https://doi.org/10.1017/S0033822200004264	Watts, W.A., 1979. Late Quaternary vegetation of central Appalachia and the New Jersey coastal plain. Ecological Monographs, 49(4), pp.427-469.	https://doi.org/10.2307/1942471
PWFTSWAL	PWFTSWAL	PWFTSWAL	10.21233/n3jn0j	Neotoma (last access: 1 April 2021)	1908	1974	Powers Fort Swale	36.6	-90.5833	91	North America	Lake	Raw	43	AWI	9	-46	22493	536.6	22539	Slackwater pond. Physiography: Qtb3 braided river terrace. Surrounding vegetation: bottomland forest.	1985-09-05 00:00:00	Royall, P.D., 1988. Late-Quaternary paleoecology and paleoenvironments of the Western Lowlands, southeast Missouri. Master's thesis. University of Tennessee, Knoxville, Tennessee, USA.		Royall, P.D., Delcourt, P.A. and Delcourt, H.R., 1991. Late Quaternary paleoecology and paleoenvironments of the central Mississippi alluvial valley. Geological Society of America Bulletin, 103(2), pp.157-170.	https://doi.org/10.1130/0016-7606(1991)103<0157:LQPAPO>2.3.CO;2
PRIMAVER	PRIMAVER	PRIMAVER	10.21233/n3944q	Neotoma (last access: 1 April 2021)	1910	1976	Primavera	-40.6667	-71.1833	800	South America	Cave	Raw	6	AWI	6	1501	4795	658.8	3294	Cave in andesitic rock formation. Physiography: rock spire near fullglacial endmoraine. Surrounding vegetation: Nothofagus antarctica shrub/steppe.	1989-12-01 00:00:00	Markgraf, V., Betancourt, J. and Rylander, K., 1996. Amberat middens from Rio Limay, Neuquen Province, Argentina.
PRIYAT	PRIYAT	PRIYAT	10.21233/n31n0w	Neotoma (last access: 1 April 2021)	1913	1979	Priyatnoye Lake	61.0333	151.717	980	Asia	Lake	Raw	45	AWI	5	-51	15282	348.5	15333			Anderson, P.M. and Lozhkin, A.V., 2002. Late Quaternary Vegetation and Climate of Siberia and the Russian Far East (Palynological and Radiocarbon Database). North East Science Center, Far East Branch, Russian Academy of Sciences, Magadan, Russia.		Anderson, P.M., Lozhkin, A.V., Belaya, B.V., Stetsenko, T.V. and Simakov, K.V., 1998. New data about the stratigraphy of late Quaternary deposits of northern Priokhot'ye. In: Environmental changes in Beringia during the Quaternary ed. by Simakov, K.V. (pp.69-87). North East Interdisciplinary Research Institute, Far East Branch, Russian Academy of Sciences, Magadan (in Russian).		Kind, N.V., 1974. Geochronology of the late Anthropogene by isotopic data. Nauka, Moscow (in Russian).		Lozhkin, A.V., Anderson, P.M., Glushkova, O.Y., Solomatkina, T.B. and Federova, I.N., 2000. About features of development of lakes in the mountain regions of the upper Kolyma. In: The Quaternary Period of Beringia ed. by K.V. Simakov (pp.22-45). North East Interdisciplinary Research Institute, Far East Branch, USSR Academy of Sciences, Magadan (in Russian).
PROTECTN	PROTECTN	PROTECTN	10.21233/n39s8s	Neotoma (last access: 1 April 2021)	1914	1980	Protection Bog	42.6222	-78.4667	430	North America	Peat	Raw	40	AWI	3	-31	12102.5	311.1	12133.5	Sphagnum bog with Ericaceous shrubs. Physiography: Valley Heads Moraine. Surrounding vegetation: Acer, Fagus, Tsuga forest.	1967-08-24 00:00:00	Miller, N.G., 1973. Late-glacial and postglacial vegetation change in southwestern New York State. Bulletin 420. New York State Museum and Science Service, The State Education Department, Albany, New York, USA.
PTESCUMI	PTESCUMI	PTESCUMI	10.21233/n36366	Neotoma (last access: 1 April 2021)	1915	1981	Point Escuminac	47.075	-64.8	6	North America	Peat	Raw	109	AWI	23	-55	12658	117.7	12713	Coastal peat cliffs, ombrotrophic bog. Physiography: level peatland.	1982-01-01 00:00:00	Warner, B.G., Tolonen, K. and Tolonen, M., 1991. A postglacial history of vegetation and bog formation at Point Escuminac, New Brunswick. Canadian Journal of Earth Sciences, 28(10), pp.1572-1582.	https://doi.org/10.1139/e91-141
PTMC-3P2	PTMC-3P2	PTMC-3P2	10.21233/n32d3x	Neotoma (last access: 1 April 2021)	1916	1982	Chesapeake Bay, Potomac River	38.0269	-76.22	0	North America	Alluvial/Fluvial	Raw	75	AWI	6	-19	3004	40.9	3023	Estuary. Physiography: coastal plain. Surrounding vegetation: not applicable.	1996-09-25 00:00:00	Willard, D.A., Cronin, T.M. and Verardo, S., 2003. Late-Holocene climate and ecosystem history from Chesapeake Bay sediment cores, USA. The Holocene, 13(2), pp.201-214.	https://doi.org/10.1191/0959683603hl607rp
PTXT-2P5	PTXT-2P5	PTXT-2P5	10.21233/n3cx61	Neotoma (last access: 1 April 2021)	1918	1984	Chesapeake Bay, Patuxent River (2-P-5)	38.3333	-76.3097	0	North America	Alluvial/Fluvial	Raw	60	AWI	2	203	982	13.2	779	Estuary. Physiography: coastal plain. Surrounding vegetation: not applicable.	1998-06-01 00:00:00	Willard, D.A., Cronin, T.M. and Verardo, S., 2003. Late-Holocene climate and ecosystem history from Chesapeake Bay sediment cores, USA. The Holocene, 13(2), pp.201-214.	https://doi.org/10.1191/0959683603hl607rp
PURTAZ	PURTAZ	PURTAZ	10.21233/n34f2h	Neotoma (last access: 1 April 2021)	1919	1986	Pur-Taz Peatland	66.7	79.7333	50	Asia	Peat	Raw	70	AWI	5	4793	10429	81.7	5636	Peat bank along thermokarst lake. Physiography: extensive low-elevation peatlands. Surrounding vegetation: open Larix forest.		Peteet, D.M., Andreev, A.A., Bardeen, W. and Mistretta, F., 1998. Long-term Arctic peatland dynamics, vegetation and climate history of the Pur-Taz region, western Siberia. Boreas, 27(2), pp.115-126.	https://doi.org/10.1111/j.1502-3885.1998.tb00872.x
PUYUK	PUYUK	PUYUK	10.21233/n30q9p	Neotoma (last access: 1 April 2021)	1920	1987	Puyuk Lake	63.5	-162.21	15	North America	Lake	Raw	38	AWI	2	33	19310	521	19277	Maar crater on volcanic island. Physiography: subdued rounded hills and volcanic cones. Surrounding vegetation: mesic low-shrub tundra.	1978-01-01 00:00:00	Ager, T.A., 1980. A 16,000 year pollen record from St. Michael Island, Norton Sound, western Alaska. In: American Quaternary Association, Sixth Biennial Meeting, Abstracts and Program, 18-20 August 1980 (p.3). Institute for Quaternary Studies, University of Maine, Orono, Maine, USA.		Ager, T.A., 1982. Vegetational history of western Alaska during the Wisconsin glacial interval and the Holocene. In: Paleoecology of Beringia ed. by D.M. Hopkins, J.V. Matthews, Jr., C.E. Schweger, and S.B. Young (pp. 75-93). Paleoecology of Beringia. Academic Press, New York, New York, USA.		Ager, T.A. and Bradbury, J.P., 1982. Quaternary history of vegetation and climate of the Yukon Delta-Norton Sound Area. In W.L. Conrad, editor. In: The United States Geological Survey in Alaska: Accomplishments during 1981. U.S. ed. by W.L. Conrad (pp.103-105). Geological Survey Circular 868.		Ager, T.A. and Brubaker, L.B., 1985. Quaternary palynology and vegetational history of Alaska. In: Pollen records of late-Quaternary North American sediments ed. by V.M. Bryant, Jr. and R.G. Holloway (pp.353-384). American Association of Stragigraphic Palynologists Foundation, Dallas, Texas, USA.
PYLE	PYLE	PYLE	10.21233/n3674t	Neotoma (last access: 1 April 2021)	1934	2001	Pyle Site	40.67	-84.89	250	North America	Lake	Raw	39	AWI	7	9234	18059	232.2	8825	Swale.	1980-01-01 00:00:00	Shane, L.C., 1987. Late-glacial vegetational and climatic history of the Allegheny Plateau and the Till Plains of Ohio and Indiana, U.S.A. Boreas, 16(1), pp.1-20.	https://doi.org/10.1111/j.1502-3885.1987.tb00750.x	Shane, L.C. and Anderson, K.H., 1993. Intensity, gradients and reversals in late glacial environmental change in east-central North America. Quaternary Science Reviews, 12(5), pp.307-320.	https://doi.org/10.1016/0277-3791(93)90039-O
QUEENS	QUEENS	QUEENS	10.21233/n3bq0c	Neotoma (last access: 1 April 2021)	1937	2004	Queens Lake	64.1167	-110.567	480	North America	Lake	Raw	33	AWI	5	-60	8428	265.2	8488	Glacial lake. Physiography: Canadian shield, rolling terrain. Surrounding vegetation: Alnus crispa, Betula glandulosa tundra.		MacDonald, G.M., Edwards, T.W., Moser, K.A., Pienitz, R. and Smol, J.P., 1993. Rapid response of treeline vegetation and lakes to past climate warming. Nature, 361(6409), pp.243-246.	https://doi.org/10.1038/361243a0	Moser, K.A. and MacDonald, G.M., 1990. Holocene vegetation change at treeline north of Yellowknife, Northwest Territories, Canada. Quaternary Research, 34(2), pp.227-239.	https://doi.org/10.1016/0033-5894(90)90033-H
QUEXIL80	QUEXIL80	QUEXIL80	10.21233/n36w8w	Neotoma (last access: 1 April 2021)	1938	2005	Lake Quexil	16.9167	-89.8167	110	North America	Lake	Raw	68	AWI	5	10575	40851	451.9	30276	Large lake. Physiography: karst.	1980-01-01 00:00:00	Leyden, B.W., 1984. Guatemalan forest synthesis after Pleistocene aridity. Proceedings of the National Academy of Sciences, 81(15), pp.4856-4859.	https://doi.org/10.1073/pnas.81.15.4856	Leyden, B.W., Brenner, M., Hodell, D.A. and Curtis, J.H., 1994. Orbital and internal forcing of climate on the Yucatan Peninsula for the past ca. 36 ka. Palaeogeography, Palaeoclimatology, Palaeoecology, 109(2-4), pp.193-210.	https://doi.org/10.1016/0031-0182(94)90176-7	Leyden, B.W., Brenner, M., Hodell, D.A. and Curtis, J.H., 1993. Late Pleistocene climate in the Central American lowlands. In: Climate change in continental isotopic records ed. by P.K. Swart, K.C. Lohmann, J. McKenzie, and S. Savin (pp.165-178). American Geophyysical Union Geophysical Monograph 78, Washington, DC, USA.
QUICKSND	QUICKSND	QUICKSND	10.21233/n3365x	Neotoma (last access: 1 April 2021)	1939	2006	Quicksand Pond	34.33	-84.87	285	North America	Lake	Raw	39	AWI	2	-69	26763	706.1	26832	Sinkhole pond. Physiography: ridge and valley province of Appal. Mtn. Surrounding vegetation: Acer rubrum/Lyonia lucida/Nyssa biflora.	1965-11-01 00:00:00	Watts, W.A., 1970. The full-glacial vegetation of northwestern Georgia. Ecology, 51(1), pp.17-33.	https://doi.org/10.2307/1933597
QUILLIN	QUILLIN	QUILLIN	10.21233/n3jj28	Neotoma (last access: 1 April 2021)	1940	2007	Quillin Site	41	-81.9667	305	North America	Peat	Raw	37	AWI	9	5313	16959	323.5	11646	Fen in kettle hollow. Physiography: Allegheny Plateau.		Shane, L.C., 1987. Late-glacial vegetational and climatic history of the Allegheny Plateau and the Till Plains of Ohio and Indiana, U.S.A. Boreas, 16(1), pp.1-20.	https://doi.org/10.1111/j.1502-3885.1987.tb00750.x	Shane, L.C. and Anderson, K.H., 1993. Intensity, gradients and reversals in late glacial environmental change in east-central North America. Quaternary Science Reviews, 12(5), pp.307-320.	https://doi.org/10.1016/0277-3791(93)90039-O
RADTKE	RADTKE	RADTKE	10.21233/n3dq81	Neotoma (last access: 1 April 2021)	1944	2011	Radtke Lake	43.4	-88.1	274	North America	Lake	Raw	50	AWI	7	-57	13386	274.3	13443		1980-09-01 00:00:00	Webb, S.L., 1983. The Holocene extension of the range of American Beech (Fagus grandifolia) into Wisconsin: Paleoecological evidence for long-distance seed dispersal. Doctoral dissertation. University of Minnesota, Minneapolis, Minnesota, USA.
RAF1	RAF1	RAF1	10.21233/n3574h	Neotoma (last access: 1 April 2021)	1945	2013	Rivière-aux-Feuilles 1	58.2328	-72.0669	205	North America	Alluvial/Fluvial	Raw	23	AWI	3	478	6348	266.8	5870	Rock basin in tundra barrens. Physiography: hilly morainic landscape, shallow till. Surrounding vegetation: Forest tundra.	1976-07-17 00:00:00	Richard, P.J.H. 1981. Paleophytogeographie postglaciaire en Ungava par l'analyse pollinique. Collection Paleo-Quebec, 13, p.154 (in French).
RAF2	RAF2	RAF2	10.21233/n39q1f	Neotoma (last access: 1 April 2021)	1946	2015	Rivière-aux-Feuilles 2	58.2169	-71.95	225	North America	Alluvial/Fluvial	Raw	23	AWI	6	481	6312	265	5831	Rock basin. Physiography: shallow till-covered undulating plateau. Surrounding vegetation: Forest tundra.	1976-07-17 00:00:00	Richard, P.J.H. 1981. Paleophytogeographie postglaciaire en Ungava par l'analyse pollinique. Collection Paleo-Quebec, 13, p.154 (in French).
RAFT	RAFT	RAFT	10.21233/n35w8k	Neotoma (last access: 1 April 2021)	1947	2016	Tourbière de la Rivière-aux-Feuilles	58.2328	-72.0669	200	North America	Peat	Raw	14	AWI	4	-58	5659	439.8	5717	Minerotrophic fen. Physiography: shallow till-covered undulating plateau. Surrounding vegetation: Forest tundra.	1978-08-20 00:00:00	Richard, P.J.H. 1981. Paleophytogeographie postglaciaire en Ungava par l'analyse pollinique. Collection Paleo-Quebec, 13, p.154 (in French).
RALAKE	RALAKE	RALAKE	10.21233/n30j0j	Neotoma (last access: 1 April 2021)	1953	2022	Ra Lake	65.236	-126.414	330	North America	Lake	Raw	13	AWI	3	-34	13048	1090.2	13082	Lake in Mackenzie River valley. Physiography: Franklin Mountains. Surrounding vegetation: Populus, Betula, Picea.	1982-04-20 00:00:00	MacDonald, G.M., 1984. Postglacial plant migration and vegetation development in the western Canadian boreal forest. Doctoral dissertation. University of Toronto, Toronto, Ontario, Canada.
RAMSAYLK	RAMSAYLK	RAMSAYLK	10.21233/n38q0r	Neotoma (last access: 1 April 2021)	1954	2023	Ramsay Lake	45.6	-76.1	200	North America	Lake	Raw	73	AWI	5	-32	12908	179.7	12940	Bedrock depression. Physiography: Canadian shield. Surrounding vegetation: boggy shrub dominated by ericaceous sps.	1972-09-28 00:00:00	Mott, R.J., 1978. Populus in late-Pleistocene pollen spectra. Canadian Journal of Botany, 56(8), pp.1021-1031.	https://doi.org/10.1139/b78-113	Mott, R.J. and Farley-Gill, L.D., 1981. Two late Quaternary pollen profiles from Gatineau Park, Quebec. Geological Survey of Canada Paper 80-31.
RANGER	RANGER	RANGER	10.21233/n31659	Neotoma (last access: 1 April 2021)	1955	2025	Ranger Lake	67.1388	-153.637	820	North America	Lake	Raw	60	AWI	8	-69	29992	509.5	30061	Cirque lake. Physiography: mountainous. Surrounding vegetation: birch shrub tundra.	1978-08-01 00:00:00	Brubaker, L.B., Garfinkee, H.L. and Edwards, M.E., 1983. A late Wisconsin and Holocene vegetation history from the central Brooks Range: implications for Alaskan palaeoecology. Quaternary Research, 20(2), pp.194-214.	https://doi.org/10.1016/0033-5894(83)90077-7
RAPID	RAPID	RAPID	10.21233/n3gj0w	Neotoma (last access: 1 April 2021)	1956	2026	Rapid Lake	42.7289	-109.194	3134	North America	Lake	Raw	46	AWI	5	-65	17411	388.4	17476	Subalpine lake w/ inlet and outlet streams. Physiography: glaciated mountains. Surrounding vegetation: Pinus albicaulis, Salix, sedges, grasses.	1985-01-01 00:00:00	Fall, P.L., 1988. Vegetation dynamics in the southern Rocky Mountains: late Pleistocene and Holocene timberline fluctuations. Doctoral dissertation. University of Arizona, Tucson, Arizona, USA.		Fall, P.L., Davis, P.T. and Zielinski, G.A., 1995. Late quaternary vegetation and climate of the Wind River Range, Wyoming. Quaternary Research, 43(3), pp.393-404.	https://doi.org/10.1006/qres.1995.1045	Zielinski, G.A. and Thompson Davis, P., 1987. Late Pleistocene age of the type Temple Lake moraine, Wind River Range, Wyoming, USA. Geographie physique et Quaternaire, 41(3), pp.397-401.	https://doi.org/10.7202/032695ar
RATTLE	RATTLE	RATTLE	10.21233/zesr-6507	Neotoma (last access: 1 April 2021)	1957	2028	Rattle Lake	49.35	-92.7	460	North America	Lake	Raw	42	AWI	7	-50	13477	329.9	13527	Small lake. Physiography: rolling terminal moraine. Surrounding vegetation: Picea/Pinus/Betula.		Steventon, R.L. and Kutzbach, J.E., 1983. University of Wisconsin radiocarbon dates XX. Radiocarbon, 25(1), pp.152-168.	https://doi.org/10.1017/S0033822200005348	Bjorck, S., 1985. Deglaciation chronology and revegetation in northwestern Ontario. Canadian Journal of Earth Sciences, 22(6), pp.850-871.	https://doi.org/10.1139/e85-090
RAYBURN	RAYBURN	RAYBURN	10.21233/n3ch3r	Neotoma (last access: 1 April 2021)	1959	2030	Rayburn's Dome	32.4667	-93.1667	61	North America	Peat	Raw	16	AWI	4	-64	24791	1657	24855		1979-01-01 00:00:00	Kolb, C.R. and Fredlund, G.G., 1981. Palynological studies: Vacherie and Rayburn's Domes, north Louisiana salt dome basin. Top Report E530-02200-T-2, Institute for Environmental Studies, Louisiana State University, Baton Rouge, Louisiana, USA.
REBEL	REBEL	REBEL	10.21233/n35467	Neotoma (last access: 1 April 2021)	1973	2045	Rebel Lake	67.4167	-149.8	914	North America	Lake	Raw	45	AWI	4	-67	16812	383.6	16879	Kettle lake. Physiography: mountainous. Surrounding vegetation: birch-heath tundra.	1980-08-01 00:00:00	Ager, T.A. and Brubaker, L.B., 1985. Quaternary palynology and vegetational history of Alaska. In: Pollen records of late-Quaternary North American sediments ed. by V.M. Bryant, Jr. and R.G. Holloway (pp.353-384). American Association of Stragigraphic Palynologists Foundation, Dallas, Texas, USA.		Edwards, M.E., Anderson, P.M., Garfinkel, H.L. and Brubaker, L.B., 1985. Late Wisconsin and Holocene vegetational history of the upper Koyukuk region, Brooks Range, Alaska. Canadian Journal of Botany, 63(3), pp.616-626.	https://doi.org/10.1139/b85-077
REDONDO	REDONDO	REDONDO	10.21233/n39h34	Neotoma (last access: 1 April 2021)	1974	2047	Redondo Lake	67.6833	-155.033	460	North America	Lake	Raw	25	AWI	2	-64	6723	282.8	6787	Kettle lake. Physiography: mountain valley. Surrounding vegetation: birch tundra, alder thickets, spruce.	1978-08-01 00:00:00	Brubaker, L.B., Garfinkee, H.L. and Edwards, M.E., 1983. A late Wisconsin and Holocene vegetation history from the central Brooks Range: implications for Alaskan palaeoecology. Quaternary Research, 20(2), pp.194-214.	https://doi.org/10.1016/0033-5894(83)90077-7
REDRIVER	REDRIVER	REDRIVER	10.21233/n35s9x	Neotoma (last access: 1 April 2021)	1975	2048	Vallée de l'Albion	45.67	-71.33	320	North America	Lake	Raw	31	AWI	4	100	14082	466.1	13982	Rock basin lake with riverine mire. Physiography: rolling moraine with prominent hills. Surrounding vegetation: Betulo luteae - Aceretum sacchari.	1969-07-10 00:00:00	Richard, P.J.H., 1975. Contribution a l'histoire postglaciaire de la vegetation dans les Cantons-de-l'Est: etude des sites de Weedon et Albion. Cahiers de geographie du Quebec, 19(47), pp.267-284 (in French).	https://doi.org/10.7202/021257ar
REDROCK	REDROCK	REDROCK	10.21233/n3236z	Neotoma (last access: 1 April 2021)	1976	2049	Redrock Lake	40.08	-105.54	3095	North America	Lake	Raw	41	AWI	10	-12	11554	289.1	11566	Depression in moraine (Mid Pindale age). Physiography: low morainic ridges in Front Range. Surrounding vegetation: Pinus, Populus, Juniperus, Ericaceae.	1969-09-01 00:00:00	Maher Jr, L.J., 1973. Pollen evidence suggests that climatic changes in the Colorado Rockies during the last 5000 years were out of phase with those in the northeastern United States. In: Abstracts, Ninth Congress International Union for Quaternary Research, 2-10 December 1973, Christchurch, New Zealand (pp. 227-228).		Maher Jr, L.J., 1972. Absolute pollen diagram of Redrock Lake, Boulder County, Colorado. Quaternary Research, 2(4), pp.531-553.	https://doi.org/10.1016/0033-5894(72)90090-7
REDSTONE	REDSTONE	REDSTONE	10.21233/n3hb4n	Neotoma (last access: 1 April 2021)	1977	2050	Redstone Lake	67.25	-152.6	914	North America	Lake	Raw	50	AWI	4	-64	16248	332.9	16312	Cirque lake. Physiography: mountanous. Surrounding vegetation: birch shrub tundra.	1979-08-01 00:00:00	Edwards, M.E., Anderson, P.M., Garfinkel, H.L. and Brubaker, L.B., 1985. Late Wisconsin and Holocene vegetational history of the upper Koyukuk region, Brooks Range, Alaska. Canadian Journal of Botany, 63(3), pp.616-626.	https://doi.org/10.1139/b85-077
REIDEL	REIDEL	REIDEL	10.21233/n34445	Neotoma (last access: 1 April 2021)	1979	2053	Reidel Lake	46.2119	-95.2842	443	North America	Lake	Raw	51	AWI	7	-54	13545	272	13599	Kettle lake in Parkers Prairie sandplain. Physiography: outwash plain, local relief 6 m. Surrounding vegetation: oak woodland.	1984-02-01 00:00:00	Almquist-Jacobson, H., Almendinger, J.E. and Hobbie, S., 1992. Influence of terrestrial vegetation on sediment-forming processes in kettle lakes of west-central Minnesota. Quaternary Research, 38(1), pp.103-116.	https://doi.org/10.1016/0033-5894(92)90033-F	Almendinger, J.E., 1988. Lake and groundwater paleohydrology: a groundwater model to explain past lake levels in west-central Minnesota. Doctoral dissertation. University of Minnesota, Minneapolis, Minnesota, USA.
REINDEER	REINDEER	REINDEER	10.21233/n30f3n	Neotoma (last access: 1 April 2021)	1980	2054	Reindeer Lake	69.1167	-132.167	3	North America	Lake	Raw	29	AWI	5	-52	18693	669.5	18745	Lake of glacial origin. Surrounding vegetation: dwarf Betula, Ericaceae, Salix, Alnus.		Spear, R.W., 1993. The palynological record of Late-Quaternary arctic tree-line in northwest Canada. Review of Palaeobotany and Palynology, 79(1-2), pp.99-111.	https://doi.org/10.1016/0034-6667(93)90040-2
RHODERVR	RHODERVR	RHODERVR	10.21233/n33457	Neotoma (last access: 1 April 2021)	1987	2061	Chesapeake Bay, Rhode River	38.8864	-76.3947	0	North America	Coast	Raw	88	AWI	9	-48	1950	23	1998	Estuary. Physiography: coastal plain. Surrounding vegetation: not applicable.	1999-06-22 00:00:00	Baucom, P.C., Bratton, J.F., Colman, S.M., Friddell, J. and Rochon, A., 2000. Sedimentology and core descriptions, Marion-Dufresne cores MD99-2204 through - 2209, Chesapeake Bay. In: Initial report on IMAGES V cruise of the Marion-Dufresne to Chesapeake Bay June 20-22, 1999. ed. by T.M. Cronin (pp.49-71). U.S. Geological Survey Open-File Report 00-306.		Willard, D.A., Cronin, T.M. and Verardo, S., 2003. Late-Holocene climate and ecosystem history from Chesapeake Bay sediment cores, USA. The Holocene, 13(2), pp.201-214.	https://doi.org/10.1191/0959683603hl607rp
RHULEFEN	RHULEFEN	RHULEFEN	10.21233/n37m1s	Neotoma (last access: 1 April 2021)	1989	2063	Rhule Fen	39.9536	-85.7417	268	North America	Peat	Raw	15	AWI	5	10969.5	15200.5	302.2	4231	Fen. Physiography: till plain. Surrounding vegetation: wetland.		Shane, L.C. and Anderson, K.H., 1993. Intensity, gradients and reversals in late glacial environmental change in east-central North America. Quaternary Science Reviews, 12(5), pp.307-320.	https://doi.org/10.1016/0277-3791(93)90039-O
RICELAKE	RICELAKE	RICELAKE	10.21233/n3036b	Neotoma (last access: 1 April 2021)	1990	2065	Rice Lake	48.0094	-101.54	620	North America	Lake	Raw	88	AWI	10	-53	10702	123.6	10755	Kettle lake. Physiography: rolling end moraine. Surrounding vegetation: agricultural, western wheatgrass prairie.	1985-12-15 00:00:00
RILEY	RILEY	RILEY	10.21233/n35x7j	Neotoma (last access: 1 April 2021)	1993	2068	R Lake	54.3056	-84.5583	147	North America	Lake	Raw	52	AWI	2	-39	9920	195.3	9959		1979-08-01 00:00:00	McAndrews, J.H., Riley, J.L. and Davis, A.M., 1982. Vegetation history of the Hudson Bay Lowland: a postglacial pollen diagram from the Sutton Ridge. Naturaliste Canadien, 109, pp.597-608.
RIOKALUY	RIOKALUY	RIOKALUY	10.21233/nda9-aw65	Neotoma (last access: 1 April 2021)	1994	2069	Río Kaluyo	-16.4333	-68.1333	4070	South America	Peat	Raw	14	AWI	3	80	11661	890.8	11581			Graf, K., 1992. Pollendiagramme aus den Anden: Eine Synthese zur Klimageschichte und Vegetationsentwicklung seit der letzten Eiszeit. Physische Geographie 34. Universitat Zurich-Irchel, Geographisches Institut, Zurich, Switzerland (in German).
ROADCUT	ROADCUT	ROADCUT	10.21233/n37v0t	Neotoma (last access: 1 April 2021)	2187	2262	L'Anse aux Meadows Road Cut Bog	51.6	-55.53	0	North America	Peat	Raw	18	AWI	2	-4	7099	417.8	7103	Basin bog. Physiography: Low relief marine terrace. Surrounding vegetation: Sphagnum/Betula/Larix/Myrica.	1982-01-01 00:00:00	Davis, A.M., 1980. Modern pollen spectra from the tundra-boreal forest transition in northern Newfoundland, Canada. Boreas, 9(2), pp.89-100.	https://doi.org/10.1111/j.1502-3885.1980.tb01030.x	Davis, A.M., 1984. Ombrotrophic peatlands in Newfoundland, Canada: Their origins, development and trans-Atlantic affinities. Chemical Geology, 44(1-3), pp.287-309.	https://doi.org/10.1016/0009-2541(84)90078-0
ROBIN	ROBIN	ROBIN	10.21233/n38h3t	Neotoma (last access: 1 April 2021)	2189	2265	Lac à Robin	48.0519	-65.2669	50	North America	Lake	Raw	33	AWI	4	449	15496	470.2	15047	Shallow rock basin with riverine marsh. Physiography: low plateau. Surrounding vegetation: Betulo luteae - Aceretum sacchari.	1978-09-14 00:00:00	Jette, H. and Richard, P.J.H., 1992. Contribution a l'histoire postglaciaire de la vegetation en Gaspesie meridionale, Quebec. Geographie physique et Quaternaire, 46(3), pp.273-284 (in French).	https://doi.org/10.7202/032914ar
ROBPOND	ROBPOND	ROBPOND	10.21233/n34t0j	Neotoma (last access: 1 April 2021)	2190	2266	Robinson's Pond	48.26	-58.81	32	North America	Lake	Raw	49	AWI	2	-16	15577	324.9	15593
ROCHMOUT	ROCHMOUT	ROCHMOUT	10.21233/n3108c	Neotoma (last access: 1 April 2021)	2191	2267	Lac des Roches Moutonnées	56.7667	-64.8167	410	North America	Lake	Raw	32	AWI	4	-41	4825	157	4866			McAndrews, J.H. and Samson, G., 1977. Analyse pollinique et implications archeologiques et geomorphologiques, lac de la Hutte Sauvage (Mushuau Nipi), Nouveau-Quebec. Geographie physique et Quaternaire, 31(1-2), pp.177-183 (in French).	https://doi.org/10.7202/1000063ar
Rock_Island_Lake	ROCKISLA	ROCKISLA	10.21233/n3gb4b	Neotoma (last access: 1 April 2021)	2192	2268	Rock Island Lake	62.1667	149.5	870	Asia	Lake	Raw	14	AWI	2	-57	6611	512.9	6668	Kettle in end moraine. Physiography: rolling hills in mountain valley. Surrounding vegetation: open larch forest.	1989-07-01 00:00:00	Lozhkin, A.V., Anderson, P.M., Eisner, W.R., Ravako, L.G., Hopkins, D.M., Brubaker, L.B., Colinvaux, P.A. and Miller, M.C., 1993. Late Quaternary lacustrine pollen records from southwestern Beringia. Quaternary Research, 39(3), pp.314-324.	https://doi.org/10.1006/qres.1993.1038
ROGERSLK	ROGERSLK	ROGERSLK	10.21233/n3bn0p	Neotoma (last access: 1 April 2021)	2194	2270	Rogers Lake	41.3525	-72.2992	11	North America	Lake	Raw	91	AWI	54	-10.5	17787	197.8	17797.5	Two basin lake. Physiography: irregular topography. Surrounding vegetation: oak, maple, hickory, birch, ash.	1960-09-01 00:00:00	Davis, M.B., 1967. Pollen accumulation rates at Rogers Lake, Connecticut, during late-and postglacial time. Review of Palaeobotany and Palynology, 2(1-4), pp.219-230.	https://doi.org/10.1016/0034-6667(67)90150-9	Davis, M.B. and Deevey, E.S., 1964. Pollen accumulation rates: estimates from late-glacial sediment of Rogers Lake. Science, 145(3638), pp.1293-1295.	https://doi.org/10.1126/science.145.3638.1293	Davis, M.B., 1969. Climatic changes in southern Connecticut recorded by pollen deposition at Rogers Lake. Ecology, 50(3), pp.409-422.	https://doi.org/10.2307/1933891
ROM	ROM	ROM	10.21233/n3df20	Neotoma (last access: 1 April 2021)	2209	2286	Lac Romer	45.97	-73.33	18	North America	Lake	Raw	31	AWI	4	-61	9709	325.7	9770	Filled lake in an erosional depression. Physiography: flat deltaic dissected plain. Surrounding vegetation: Caryo - Aceretum sacchari.	1978-01-01 00:00:00	Comtois, P.G., 1979. Histoire holocene du climat et de la vegetation a Lanoraie. Master's thesis. Universite de Montreal, Quebec, Canada.
ROSE1	ROSE1	ROSE1	10.21233/n38n02	Neotoma (last access: 1 April 2021)	2210	2287	Rose Swamp	44.18	-79.44	228	North America	Peat	Raw	22	AWI	2	46	12538	594.9	12492	Swamp in drumlin field. Physiography: Newmarket till plain. Surrounding vegetation: Pinus/Tsuga/Juniperus/Acer/Fagus/Ulmus.	1982-07-06 00:00:00	Dibb, G.C., 1985. Late palaeo-indian settlement patterns along the margins of the Simcoe Lowlands in southcentral Ontario. Doctoral dissertation. Department of Anthropology, Trent University, Peterborough, Ontario.
ROSELK	ROSELK	ROSELK	10.21233/n31460	Neotoma (last access: 1 April 2021)	2212	2289	Rose Lake	41.9	-77.92	690	North America	Lake	Raw	34	AWI	2	113	17433	524.8	17320	Ice-block depr. lake on term. moraine. Physiography: Appalachian Plateau. Surrounding vegetation: mixed hardwood forest dom. by Tsuga.	1977-02-01 00:00:00	Cotter, J.F.P. and Crowl, G.H., 1981. The paleolimnology of Rose Lake, Potter Co., Pennsylvania: A comparison of palynologic and paleo-pigment studies. In: Geobotany II ed. by R.C. Romans (pp. 91-116). Plenum Press, New York, New York, USA.
ROSSBURG	ROSSBURG	ROSSBURG	10.21233/n3995t	Neotoma (last access: 1 April 2021)	2213	2290	Rossburg Bog	46.5833	-93.6	372	North America	Peat	Raw	23	AWI	3	1994	14004	545.9	12010	Peat bog. Physiography: rolling Wisconsin ground moraine. Surrounding vegetation: Sphagnum moss.		Wright Jr, H.E. and Watts, W.A., 1969. Glacial and vegetational history of northeastern Minnesota. Special Publications Series 11. Minnesota Geological Survey, University of Minnesota, Minneapolis, Minnesota, USA.		Swain, F.M., 1967. Stratigraphy and biochemical paleontology of Rossburg peat (Recent), north-central Minnesota. University of Kansas, Department of Geology Special Publication 2.
ROSSPOND	ROSSPOND	ROSSPOND	10.21233/n31t10	Neotoma (last access: 1 April 2021)	2214	2292	Ross Pond	43.92	-69.49	37	North America	Lake	Raw	76	AWI	6	-19	14402	192.3	14421	Glacial scour lake. Physiography: rolling, local relief 30 m. Surrounding vegetation: spruce-fir/northern hardwoods.	1985-02-01 00:00:00	Kellogg, D.C., 1993. Prehistoric landscapes, paleoenvironments, and archaeology of western Muscongus Bay, Maine. Doctoral Dissertation. University of Maine, Orono, Maine, USA.
ROSTOCK1	ROSTOCK1	ROSTOCK1	10.21233/n3h46b	Neotoma (last access: 1 April 2021)	2215	2293	Rostock Mammoth Site	43.5	-81	333	North America	Peat	Raw	32	AWI	3	11555	19293	249.6	7738	The site is a shallow depression filled with marl capped by peat. The fossils are from the marl.		McAndrews, J.H. and Jackson, L.J., 1988. Age and environment of Late Pleistocene mastodont and mammoth in southern Ontario. Bulletin 33, Buffalo Society of Natural Sciences, Buffalo, New York, USA.		Pilny, J.J., Morgan, A.V. and Morgan, A., 1987. Paleoclimatic implications of a Late Wisconsinan insect assemblage from Rostock, southwestern Ontario. Canadian Journal of Earth Sciences, 24(4), pp.617-630.	https://doi.org/10.1139/e87-060
RS29	RS29	RS29	10.21233/n30472	Neotoma (last access: 1 April 2021)	2219	2297	Lake RS29	73.1333	-95.2833	180	North America	Lake	Raw	19	AWI	7	37	11280	624.6	11243	Lake. Physiography: Somerset Island. Surrounding vegetation: polar desert.		Gajewski, K., 1995. Modern and Holocene pollen assemblages from some small Arctic lakes on Somerset Island, NWT, Canada. Quaternary Research, 44(2), pp.228-236.	https://doi.org/10.1006/qres.1995.1067
RS36	RS36	RS36	10.21233/n36r1v	Neotoma (last access: 1 April 2021)	2225	2303	Lake RS36	72.5864	-95.0754	160	North America	Lake	Raw	18	AWI	9	505	13511	765.1	13006	Lake. Physiography: Somerset Island. Surrounding vegetation: dwarf shrub tundra.		Gajewski, K., 1995. Modern and Holocene pollen assemblages from some small Arctic lakes on Somerset Island, NWT, Canada. Quaternary Research, 44(2), pp.228-236.	https://doi.org/10.1006/qres.1995.1067
RUPPERT	RUPPERT	RUPPERT	10.21233/n35r2x	Neotoma (last access: 1 April 2021)	2232	2311	Ruppert Lake	67.07	-154.24	210	North America	Lake	Raw	55	AWI	9	566	15533	277.2	14967	Kettle lake on terminal moraine. Physiography: base of mountains. Surrounding vegetation: black spruce forest.	1978-07-01 00:00:00	Brubaker, L.B., Garfinkee, H.L. and Edwards, M.E., 1983. A late Wisconsin and Holocene vegetation history from the central Brooks Range: implications for Alaskan palaeoecology. Quaternary Research, 20(2), pp.194-214.	https://doi.org/10.1016/0033-5894(83)90077-7
RUSAKA	RUSAKA	RUSAKA	10.21233/n31x92	Neotoma (last access: 1 April 2021)	2233	2312	Rusaka Swamp	-3.43333	29.6167	2070	Africa	Peat	Raw	141	AWI	33	471	40780	287.9	40309	Raised mire, drained for agriculture. Physiography: Burundi highlands. Surrounding vegetation: sweet potato, bean, and manihot fields.	1990-11-01 00:00:00	Bonnefille, R., Riollet, G., Buchet, G., Icole, M., Lafont, R., Arnold, M. and Jolly, D., 1995. Glacialanterglacial record from intertropical Africa, high resolution pollen and carbon data at Rusaka, Burundi. Quaternary Science Reviews, 14(9), pp.917-936.	https://doi.org/10.1016/0277-3791(95)00071-2
RUTZLAKE	RUTZLAKE	RUTZLAKE	10.21233/n36d5x	Neotoma (last access: 1 April 2021)	2235	2314	Rutz Lake	44.8708	-93.859	314	North America	Lake	Raw	39	AWI	8	48	13165	345.2	13117	Kettle lake. Physiography: gently rolling moraine (Des Moines Lobe). Surrounding vegetation: agricultural.		Stuiver, M., 1975. Climate versus changes in 13C content of the organic component of lake sediments during the Late Quarternary. Quaternary Research, 5(2), pp.251-262.	https://doi.org/10.1016/0033-5894(75)90027-7	Waddington, J.C., 1969. A stratigraphic record of the pollen influx to a lake in the Big Woods of Minnesota. Geological Society of America Special Paper 123, pp.263-282.
RYAZANOV	Ryazanovka	RYAZANOV	10.21233/n3d752	Neotoma (last access: 1 April 2021)	2238	2317	Ryazanovka Exposure	42.8333	131.367	6	Asia	Alluvial/Fluvial	Raw	10	AWI	3	561	6056	610.6	5495	Exposure in alluvial-lagoon terrace. Physiography: lower river valley. Surrounding vegetation: Quercus-Carpinus-Abies-Pinus forest.	1970-06-15 00:00:00	Anderson, P.M. and Lozhkin, A.V., 2002. Late Quaternary Vegetation and Climate of Siberia and the Russian Far East (Palynological and Radiocarbon Database). North East Science Center, Far East Branch, Russian Academy of Sciences, Magadan, Russia.		Korotky, A.M., Karaulova, L.P. and Troitskaya, T.S., 1980. The Quaternary deposits of Primor'ye. Nauka, Novosibirsk (in Russian).		Shilo, N.A., 1987. Resolution: Interagency Stratigraphic meeting of Quaternary system of eastern USSR. North East Interdisciplinary Research Institute, Far East Branch, USSR Academy of Sciences, Magadan (in Russian).
RYERSE	RYERSE	RYERSE	10.21233/n38j35	Neotoma (last access: 1 April 2021)	2239	2318	Ryerse Lake	46.1319	-85.1792	259	North America	Lake	Raw	29	AWI	6	-38.5	9206	330.2	9244.5
SABLE		SABLE	10.21233/n34r0v	Neotoma (last access: 1 April 2021)	2240	2319	Lac au Sable	51.39	-66.21	530	North America	Lake	Raw	20	AWI	4	4450	8024	188.1	3574	Moderate relief, stream-fed lake. Physiography: Laurentide Massif. Surrounding vegetation: black spruce, balsam fir.	1982-07-01 00:00:00	King, G.A., 1986. Deglaciation and vegetation history of western Labrador and adjacent Quebec. Doctoral dissertation. University of Minnesota, Minneapolis, Minnesota, USA.
SAJAMA1		SAJAMA1	10.21233/n31q1z	Neotoma (last access: 1 April 2021)	2244	2323	Sajama	-18.1667	-68.8833	4250	South America	Peat	Raw	15	AWI	2	-65	4903	354.9	4968			Ybert, J.P. and Miranda, Y., 1984. Analisis palinologico de un corte del Sajama. Actas II Congreso Geologico Bolivia, pp.691-694 (in Spanish).
SAKANA		SAKANA	10.21233/n3h182	Neotoma (last access: 1 April 2021)	2245	2324	Sakana Lake	67.4333	-147.85	640	North America	Lake	Raw	20	AWI	4	199	15559	808.4	15360	Kettle lake. Physiography: mountainous. Surrounding vegetation: open black spruce forest.	1982-07-01 00:00:00
SALADO		SALADO	10.21233/n37j47	Neotoma (last access: 1 April 2021)	2247	2326	Salado	-35.3333	-69.75	3200	South America	Peat	Raw	19	AWI	2	-39	4835	270.8	4874	Bog in the upper Ao. Yaucha/L. Diamante. Physiography: volcanic region, glaciated. Surrounding vegetation: high Andean grassland.	1975-02-01 00:00:00	Markgraf, V., 1983. Late and postglacial vegetational and paleoclimatic changes in subantarctic, temperate, and arid environments in Argentina. Palynology, 7(1), pp.43-70.	https://doi.org/10.1080/01916122.1983.9989252
SALILC3		SALILC3	10.21233/n33r1x	Neotoma (last access: 1 April 2021)	2248	2327	Lagoa Campestre de Salitre	-19	-46.7667	980	South America	Peat	Raw	77	AWI	15	2172	67388	858.1	65216	Peat bog in a depression. Physiography: depression. Surrounding vegetation: semideciduous forest/dry forest.	1988-10-01 00:00:00	Ledru, M.P., 1992. Modifications de la vegetation du Bresil Central entre la derniere epoque glaciaire et l'interglaciaire actuel. Comptes Rendus de la Academie des Sciences de Paris Serie II, 314, pp.117-123 (in French).		Ledru, M.P., 1993. Late Quaternary environmental and climatic changes in central Brazil. Quaternary research, 39(1), pp.90-98.	https://doi.org/10.1006/qres.1993.1011	Ledru, M.P., Behling, H., Fournier, M., Martin, L. and Servant, M., 1994. Localisation de la foret d'Araucaria du Bresil au cours de l'Holocene. Implications paleoclimatiques. Comptes rendus de l'Academie des sciences. Serie 3, Sciences de la vie, 317(6), pp.517-521 (in French).
SALINA2		SALINA2	10.21233/n3018d	Neotoma (last access: 1 April 2021)	2249	2328	Salina 2	-32.25	-69.3333	2000	South America	Peat	Raw	15	AWI	2	66	7421	525.4	7355	Peat mound near playa Uspallata Valley. Physiography: bajadas with spring mounds. Surrounding vegetation: Monte desert with Larrea divaricata.	1975-03-01 00:00:00	Markgraf, V., 1983. Late and postglacial vegetational and paleoclimatic changes in subantarctic, temperate, and arid environments in Argentina. Palynology, 7(1), pp.43-70.	https://doi.org/10.1080/01916122.1983.9989252
SAM		SAM	10.21233/n30q1n	Neotoma (last access: 1 April 2021)	2253	2332	Lac à Sam	46.6542	-72.9789	240	North America	Lake	Raw	53	AWI	6	312	11403	213.3	11091	Rock basin lake. Physiography: hilly morainic landscape. Surrounding vegetation: Betulo luteae - Aceretum sacchari.	1975-09-04 00:00:00
SANABRIA		SANABRIA	10.21233/n36j25	Neotoma (last access: 1 April 2021)	2255	2335	Sanabria Marsh	42.1	-6.73333	1050	Europe	Peat	Raw	97	AWI	3	9	16742	174.3	16733	Small marsh in former lake. Physiography: In a morraine at the head of the valley. Surrounding vegetation: Quercus pyrenaica in valley, heather.	1981-05-01 00:00:00	Allen, J.R., Huntley, B. and Watts, W.A., 1996. The vegetation and climate of northwest Iberia over the last 14,000 years. Journal of Quaternary Science, 11(2), pp.125-147.	https://doi.org/10.1002/(SICI)1099-1417(199603/04)11:2<125::AID-JQS232>3.0.CO;2-U	Hannon, G.E., 1985. Late Quaternary vegetation of Sanabria Marsh, North West Spain. Master's thesis. Trinity College, Dublin, Ireland.		Turner, C. and Hannon, G.E., 1988. Vegetational evidence for late Quaternary climatic changes in southwest Europe in relation to the influence of the North Atlantic Ocean. Philosophical Transactions of the Royal Society of London. B, Biological Sciences, 318(1191), pp.451-485.	https://doi.org/10.1098/rstb.1988.0019
SANJOAQ		SANJOAQ	10.21233/n3c09v	Neotoma (last access: 1 April 2021)	2258	2338	San Joaquin Marsh	33.6583	-117.858	2	North America	Peat	Raw	47	AWI	7	-55	8073	176.7	8128	Salt marsh. Physiography: coastal. Surrounding vegetation: salt marsh, urban.	1989-02-01 00:00:00	Davis, O.K., 1992. Rapid climatic change in coastal southern California inferred from pollen analysis of San Joaquin Marsh. Quaternary Research, 37(1), pp.89-100.	https://doi.org/10.1016/0033-5894(92)90008-7
SAPAUG		SAPAUG	10.21233/n33h38	Neotoma (last access: 1 April 2021)	2260	2340	San Agustin Plains	33.8667	-108.25	2069	North America	Lake	Raw	16	AWI	4	18536	26304	517.9	7768	Playa lake. Physiography: Datil-Mogollon volcanic plateau. Surrounding vegetation: pinyon-juniper woodland.	1982-01-01 00:00:00	Markgraf, V., Bradbury, J.P., Forester, R.M., Singh, G. and Sternberg, R.S., 1984. San Agustin Plains, New Mexico: age and paleoenvironmental potential reassessed. Quaternary Research, 22(3), pp.336-343.	https://doi.org/10.1016/0033-5894(84)90027-9
SARNIA1		SARNIA1	10.21233/n3jv10	Neotoma (last access: 1 April 2021)	2261	2341	Sarnia Elk Site Section	42.98	-82.32	185	North America	Peat	Raw	45	AWI	2	-54	6360	145.8	6414
SAV1		SAV1	10.21233/n3f172	Neotoma (last access: 1 April 2021)	2262	2342	Lac Manitou	46.06	-74.37	454	North America	Lake	Raw	47	AWI	3	8	12159	264.2	12151	Rock basin. Physiography: hilly morainic landscape. Surrounding vegetation: Betulo luteae - Aceretum sacchari.	1977-02-27 00:00:00	Savoie, L. and Richard, P.J.H., 1979. Paleophytogeographie de l'episode de Saint-Narcisse dans la region de Sainte-Agathe, Quebec. Geographie physique et Quaternaire, 33(2), pp.175-188 (in French).	https://doi.org/10.7202/1000067ar
SAV2		SAV2	10.21233/n39b55	Neotoma (last access: 1 April 2021)	2263	2343	Lac aux Quenouilles	46.17	-74.38	403	North America	Lake	Raw	48	AWI	6	-8	13259	282.3	13267	Rock basin lake. Physiography: hilly morainic landscape. Surrounding vegetation: Betulo luteae - Aceretum sacchari.	1976-01-01 00:00:00	Savoie, L. and Richard, P.J.H., 1979. Paleophytogeographie de l'episode de Saint-Narcisse dans la region de Sainte-Agathe, Quebec. Geographie physique et Quaternaire, 33(2), pp.175-188 (in French).	https://doi.org/10.7202/1000067ar
SC1POND		SC1POND	10.21233/n32h3z	Neotoma (last access: 1 April 2021)	2268	2348	SC1 Pond	54.4167	-131.907	550	North America	Lake	Raw	19	AWI	3	41.5	8005	442.4	7963.5	Small subalpine lake. Physiography: San Christoval Range, Moresby Island. Surrounding vegetation: Ts mert, Chamae noot, Pinus contorta.		Pellatt, M.G. and Mathewes, R.W., 1997. Holocene tree line and climate change on the Queen Charlotte Islands, Canada. Quaternary Research, 48(1), pp.88-99.	https://doi.org/10.1006/qres.1997.1903
SCREAMIN		SCREAMIN	10.21233/n38b4g	Neotoma (last access: 1 April 2021)	2270	2351	Screaming Yellowlegs Pond	67.5833	-151.417	650	North America	Lake	Raw	37	AWI	8	-68	17744	494.8	17812	Kettle lake. Physiography: mountainous. Surrounding vegetation: black spruce muskeg.	1981-07-01 00:00:00	Edwards, M.E., Anderson, P.M., Garfinkel, H.L. and Brubaker, L.B., 1985. Late Wisconsin and Holocene vegetational history of the upper Koyukuk region, Brooks Range, Alaska. Canadian Journal of Botany, 63(3), pp.616-626.	https://doi.org/10.1139/b85-077
SEAGULL		SEAGULL	10.21233/n34n2k	Neotoma (last access: 1 April 2021)	2271	2352	Seagull Lake	68.25	-145.18	637	North America	Lake	Raw	36	AWI	4	74	16174	460	16100	Kettle lake. Physiography: low mountains. Surrounding vegetation: birch tundra, white spruce stands.	1982-07-01 00:00:00
SEIDEL01		SEIDEL01	10.21233/n3595k	Neotoma (last access: 1 April 2021)	2274	2355	Seidel	44.45	-87.53	211	North America	Lake	Raw	28	AWI	6	9001	15669	247	6668	Lake in enclosed hollow. Physiography: ground moraine of the Valders substage. Surrounding vegetation: agricultural/Alnus/Cornus/Betula/Larix.	1970-01-01 00:00:00	West, R.G., 1961. Late-and postglacial vegetational history in Wisconsin, particularly changes associated with the Valders readvance. American Journal of Science, 259(10), pp.766-783.	https://doi.org/10.2475/ajs.259.10.766
SELEN1		SELEN1	10.21233/n3c48v	Neotoma (last access: 1 April 2021)	2276	2358	Selennyakhskaya-1 Exposure	69.2403	137.822	354	Asia	Alluvial/Fluvial	Raw	6	AWI	3	3281	13260	1995.8	9979	Exposure in river bank. Physiography: stream valley in tectonic depression. Surrounding vegetation: open Larix forest.		Anderson, P.M. and Lozhkin, A.V., 2002. Late Quaternary Vegetation and Climate of Siberia and the Russian Far East (Palynological and Radiocarbon Database). North East Science Center, Far East Branch, Russian Academy of Sciences, Magadan, Russia.
SELEN4		SELEN4	10.21233/n3ct0q	Neotoma (last access: 1 April 2021)	2279	2361	Selennyakhskaya-4 Exposure	69.1139	138.056	354	Asia	Alluvial/Fluvial	Raw	4	AWI	2	1298	9807	2836.3	8509	Exposure in river bank. Physiography: stream valley in tectonic depression. Surrounding vegetation: open Larix forest.		Anderson, P.M. and Lozhkin, A.V., 2002. Late Quaternary Vegetation and Climate of Siberia and the Russian Far East (Palynological and Radiocarbon Database). North East Science Center, Far East Branch, Russian Academy of Sciences, Magadan, Russia.
Selitkan-1	Selitkan-1	SELITKA1	10.21233/n38376	Neotoma (last access: 1 April 2021)	2280	2362	Selitkan-1 Exposure	53.2167	135.05	1320	Asia	Peat	Raw	56	AWI	6	-14	7857	143.1	7871	Exposure on peat hillock. Physiography: river valley in mountains. Surrounding vegetation: shrub-herb mountain tundra.	1982-07-01 00:00:00	Anderson, P.M. and Lozhkin, A.V., 2002. Late Quaternary Vegetation and Climate of Siberia and the Russian Far East (Palynological and Radiocarbon Database). North East Science Center, Far East Branch, Russian Academy of Sciences, Magadan, Russia.		Korotky, A.M. and Kovalyukh, N.N., 1987. Rhythms of perrenial permafrost: a reflection of climate changes during the late Pleistocene and Holocene. In: Paleogeographic investigations in the Far East ed. by A.M. Korotky and V.S. Pushkar (pp.20-36). Far Eastern Science Center of the USSR Academy of Sciences, Vladivostok (in Russian).		Korotky, A.M., Mokhova, L.M. and Pushkar, V.S., 1985. The climate changes of the Holocene and landscape evolution of bald mountains of central Yam-Alin'. In: Paleogeographic investigations in the Far East ed. by Korotky, AM and Pushkar, VS (pp.5-22). Far Eastern Science Center of the USSR Academy of Sciences, Vladivostok (in Russian).		Korotky, A.M., Mayuchaya, L.V. and Gvozdeva, I.G., 1985. Indicator species of broadleaf vegetation and the structure of subfossil complex in different climates of the south Far East. In: Ancient climates and vegetation in far eastern Asia ed. by A.M. Korotky and V.S. Pushkar (pp.4-15). Far Eastern Science Center of the USSR Academy of Sciences, Vladivostok (in Russian).		Korotky, A.M., Kovalyukh, N.N. and Volkov, V.G., 1989. Radiocarbon dating of Quaternary deposits (south Far East). Preprint. Far East Branch of the USSR Academy of Sciences, Vladivostok (in Russian).		Korotky, A.M., Pletnev, S.P., Pushkar, V.S., Grebennikova, T.A., Raszhigaeva, N.T., Sahebgareeva, E.D. and Mohova, L.M., 1988. Evolution environment of south Far East (late Pleistocene and Holocene). Nauka, Moscow (in Russian).
Selitkan-2	Selitkan-2	SELITKA2	10.21233/n34958	Neotoma (last access: 1 April 2021)	2281	2363	Selitkan-2 Exposure	53.2167	135.033	1300	Asia	Peat	Raw	17	AWI	4	270	6608	396.1	6338	Exposure in boggy terrain in mountains. Physiography: upper river valley in mountains. Surrounding vegetation: shrub tundra.	1982-07-05 00:00:00	Anderson, P.M. and Lozhkin, A.V., 2002. Late Quaternary Vegetation and Climate of Siberia and the Russian Far East (Palynological and Radiocarbon Database). North East Science Center, Far East Branch, Russian Academy of Sciences, Magadan, Russia.		Korotky, A.M., Pletnev, S.P., Pushkar, V.S., Grebennikova, T.A., Raszhigaeva, N.T., Sahebgareeva, E.D. and Mohova, L.M., 1988. Evolution environment of south Far East (late Pleistocene and Holocene). Nauka, Moscow (in Russian).		Volkov, I.A. and Arkhipov, S.A., 1978. Quaternary deposits of the Novosibirsk Region. Joint Institute for Geology, Geophysics and Mineralogy, Siberia Branch, USSR Academy of Sciences, Novosibirsk (in Russian).
Selitkan-3	Selitkan-3	SELITKA3	10.21233/n30m3c	Neotoma (last access: 1 April 2021)	2282	2364	Selitkan-3 Exposure	53.2167	135.067	1310	Asia	Alluvial/Fluvial	Raw	10	AWI	2	1508	11282	1086	9774	River terrace. Physiography: river valley in mountains. Surrounding vegetation: shrub tundra.	1982-07-10 00:00:00	Anderson, P.M. and Lozhkin, A.V., 2002. Late Quaternary Vegetation and Climate of Siberia and the Russian Far East (Palynological and Radiocarbon Database). North East Science Center, Far East Branch, Russian Academy of Sciences, Magadan, Russia.		Korotky, A.M. and Kovalyukh, N.N., 1987. Rhythms of perrenial permafrost: a reflection of climate changes during the late Pleistocene and Holocene. In: Paleogeographic investigations in the Far East ed. by A.M. Korotky and V.S. Pushkar (pp.20-36). Far Eastern Science Center of the USSR Academy of Sciences, Vladivostok (in Russian).
SEPTILES		SEPTILES	10.21233/n36f4w	Neotoma (last access: 1 April 2021)	2285	2367	LD Lake	50.14	-67.13	122	North America	Lake	Raw	41	AWI	2	-55	8209	206.6	8264		1972-01-01 00:00:00	Mott, R.J., 1976. Holocene pollen profile from the Sept Iles area, Quebec. Naturaliste Canadien, 103, pp.457-467.
Sergeevskii	Sergeevskii	SERGPEAT	10.21233/n32n1k	Neotoma (last access: 1 April 2021)	2286	2368	Sergeevskii Peat	49.2333	142.083	6	Asia	Peat	Raw	57	AWI	8	1619	8107	115.9	6488	Peat. Physiography: stream valley. Surrounding vegetation: Picea-Abies forest.	1986-08-20 00:00:00	Anderson, P.M. and Lozhkin, A.V., 2002. Late Quaternary Vegetation and Climate of Siberia and the Russian Far East (Palynological and Radiocarbon Database). North East Science Center, Far East Branch, Russian Academy of Sciences, Magadan, Russia.		Korotky, A., Grebennikova, T., Razjigaeva, N., Volkov, V., Mokhova, L., Ganzey, L. and Bazarova, V., 1997. Marine terraces of western Sakhalin Island. Catena, 30(1), pp.61-81.	https://doi.org/10.1016/S0341-8162(97)00002-7	Korotkiy, A.M., Pushkar, V.S., Grebennikova, T.A., Razzhigaeva, N.G., Karaulova, L.P., Mokhova, L.M., Ganzey, L.A., Cherepanova, M.N., Bazarova, V.B., Volkov, V.G. and Kovalyukh, N.N., 1997. Marine terraces and Quandary history of the Sakhalin shelf. Dalnauka, Vladivostok (in Russian).		Korotky, A.M., Kovalyukh, N.N. and Volkov, V.G., 1989. Radiocarbon dating of Quaternary deposits (south Far East). Preprint. Far East Branch of the USSR Academy of Sciences, Vladivostok (in Russian).
Sergeevka_River	Sergeevka_River	SERGRIV	10.21233/n3bt1s	Neotoma (last access: 1 April 2021)	2287	2369	Mouth of Sergeevka River	49.2333	142.083	2	Asia	Alluvial/Fluvial	Raw	10	AWI	3	51	2171	235.6	2120	Exposure in lagoon terrace. Physiography: river mouth on coast. Surrounding vegetation: Picea-Abies taiga.	1987-09-06 00:00:00	Anderson, P.M. and Lozhkin, A.V., 2002. Late Quaternary Vegetation and Climate of Siberia and the Russian Far East (Palynological and Radiocarbon Database). North East Science Center, Far East Branch, Russian Academy of Sciences, Magadan, Russia.		Korotky, A., Grebennikova, T., Razjigaeva, N., Volkov, V., Mokhova, L., Ganzey, L. and Bazarova, V., 1997. Marine terraces of western Sakhalin Island. Catena, 30(1), pp.61-81.	https://doi.org/10.1016/S0341-8162(97)00002-7	Korotkiy, A.M., Pushkar, V.S., Grebennikova, T.A., Razzhigaeva, N.G., Karaulova, L.P., Mokhova, L.M., Ganzey, L.A., Cherepanova, M.N., Bazarova, V.B., Volkov, V.G. and Kovalyukh, N.N., 1997. Marine terraces and Quandary history of the Sakhalin shelf. Dalnauka, Vladivostok (in Russian).
SFS		SFS	10.21233/n3dz0d	Neotoma (last access: 1 April 2021)	2291	2373	Saint-Francois de Sales	48.2939	-72.1469	358	North America	Lake	Raw	40	AWI	4	62	12420	316.9	12358	Kettle lake (?) with riverine mire. Physiography: outwash plain. Surrounding vegetation: Betulo papyriferaea - Abietetum.	1974-08-29 00:00:00	Richard, P.J.H., 1977. Histoire post-wisconsinienne de la vegetation du Quebec meridional par l'analyse pollinique. Service de la recherche, Direction generale des forets, Ministere des Terres et Forets du Quebec (in French).
SHAWSBOG		SHAWSBOG	10.21233/n39w96	Neotoma (last access: 1 April 2021)	2295	2377	Shaws Bog	45.0167	-64.1833	30	North America	Peat	Raw	39	AWI	4	-67	10265	271.9	10332	Peat bog in valley of Shey Brook. Physiography: irregular hilly area. Surrounding vegetation: Prunus/Picea/Larix/Acer/Populus/Betula.		Hadden, K.A., 1975. A pollen diagram from a postglacial peat bog in Hants County, Nova Scotia. Canadian Journal of Botany, 53(1), pp.39-47.	https://doi.org/10.1139/b75-005
SHE		SHE	10.21233/n3637k	Neotoma (last access: 1 April 2021)	2296	2378	Mont Shefford	45.3589	-72.5847	282	North America	Lake	Raw	55	AWI	10	11	15114	279.7	15103	Red maple - Balsam fir Carr. Physiography: central depression on monteregian hill. Surrounding vegetation: Tilio - Aceretum sacchari.	1974-11-16 00:00:00	Richard, P.J.H., 1977. Histoire post-wisconsinienne de la vegetation du Quebec meridional par l'analyse pollinique. Service de la recherche, Direction generale des forets, Ministere des Terres et Forets du Quebec (in French).		Richard, P., 1978. Histoire tardiglaciaire et postglaciaire de la vegetation au mont Shefford, Quebec. Geographie physique et Quaternaire, 32(1), pp.81-93 (in French).	https://doi.org/10.7202/1000290ar
SHERD		SHERD	10.21233/n3hr08	Neotoma (last access: 1 April 2021)	2299	2381	Sherd Lake	44.2697	-107.012	2665	North America	Lake	Raw	58	AWI	2	-51	15914	280.1	15965	Moraine dammed lake. Physiography: Bighorn Mountains. Surrounding vegetation: lodgepole pine forest.		Burkart, M.R., 1976. Pollen biostratigraphy and late Quaternary vegetation history of the Bighorn Mountains, Wyoming. Doctoral dissertation. University of Iowa, Iowa City, Iowa, USA.
SHOULD1		SHOULD1	10.21233/n3cx7d	Neotoma (last access: 1 April 2021)	2300	2382	Shouldice Lake	45.15	-81.42	206	North America	Lake	Raw	60	AWI	5	-45	11101	188.9	11146
SILVERNS		SILVERNS	10.21233/n34f3w	Neotoma (last access: 1 April 2021)	2302	2384	Silver Lake	44.56	-63.64	69	North America	Lake	Raw	48	AWI	3	-52	17086	364.6	17138			Livingstone, D.A., 1968. Some interstadial and postglacial pollen diagrams from eastern Canada. Ecological monographs, 38(2), pp.87-125.	https://doi.org/10.2307/1942289
SILVEROH		SILVEROH	10.21233/n30r10	Neotoma (last access: 1 April 2021)	2303	2385	Silver Lake	40.3543	-83.8125	332	North America	Lake	Raw	44	AWI	13	-14	18938	440.7	18952	Silver Lake is a compound kettle located on the Central Lowland Till Plain, and was formed when the Miami Sublobe of the Lake Erie Lobe of the Laurentide Ice Sheet retreated from what is now the Farmersville Moraine. Surrounding vegetation: agriculture, oak, hickory, black cherry.	1961-01-01 00:00:00	Ogden III, J.G., 1966. Forest History of Ohio. I, Radiocarbon Dates and Pollen Stratigraphy of Silver Lake, Logan County, Ohio. The Ohio Journal of Science, 66(4), pp.387-400.		Ogden III, J.G., 1969. Correlation of contemporary and Late Pleistocene pollen records in the reconstruction of Postglacial environments in Northeastern North America. Mitteilungen Internationale Vereinigung fur Theoretische und Angewandte Limnologie, 17(1), pp.64-77.	https://doi.org/10.1080/05384680.1969.11903871
SILYAR2		SILYAR2	10.21233/n31d40	Neotoma (last access: 1 April 2021)	2306	2388	Siluyanov Yar-2 Exposure	46.1333	137.833	25	Asia	Alluvial/Fluvial	Raw	14	AWI	6	2719	44720	3230.8	42001	Exposure in fluvial terrace. Physiography: river valley. Surrounding vegetation: Betula-broadleaf forest.	1978-07-06 00:00:00	Anderson, P.M. and Lozhkin, A.V., 2002. Late Quaternary Vegetation and Climate of Siberia and the Russian Far East (Palynological and Radiocarbon Database). North East Science Center, Far East Branch, Russian Academy of Sciences, Magadan, Russia.		Korotky, A.M. and Lobanova, L.A., 1984. Radiocarbon dating and paleographic boundaries of the late Pleistocene-Holocene. In: Paleogeograhic boundaries and methods for their study ed. by A.M. Korotky and V.S. Pushkar (pp.106-114). Far Eastern Science Center, USSR Academy of Sciences, Vladivostok (in Russian).		Korotky, A.M., Pletnev, S.P., Pushkar, V.S., Grebennikova, T.A., Raszhigaeva, N.T., Sahebgareeva, E.D. and Mohova, L.M., 1988. Evolution environment of south Far East (late Pleistocene and Holocene). Nauka, Moscow (in Russian).
SINKHOLE		SINKHOLE	10.21233/n3bx8g	Neotoma (last access: 1 April 2021)	2308	2391	Sinkhole Pond	43.96	-70.34	95	North America	Lake	Raw	54	AWI	12	-28.8	14718	278.2	14746.8	Kettle lake in glaciomarine delta. Physiography: outwash plain (glaciomarine delta). Surrounding vegetation: oak and pitch pine.	1981-01-01 00:00:00
SIOUX		SIOUX	10.21233/9yf5-e111	Neotoma (last access: 1 April 2021)	2309	2393	Sioux Pond	49.9333	-91.5667	410	North America	Lake	Raw	32	AWI	5	2841	12070	297.7	9229	Small lake with floating peat mat. Physiography: sioux lookout moraine. Surrounding vegetation: black spruce/jack pine/balsam fir.	1981-08-01 00:00:00	Steventon, R.L. and Kutzbach, J.E., 1983. University of Wisconsin radiocarbon dates XX. Radiocarbon, 25(1), pp.152-168.	https://doi.org/10.1017/S0033822200005348	Bjorck, S., 1985. Deglaciation chronology and revegetation in northwestern Ontario. Canadian Journal of Earth Sciences, 22(6), pp.850-871.	https://doi.org/10.1139/e85-090
SJ89		SJ89	10.21233/n37w9k	Neotoma (last access: 1 April 2021)	2311	2395	San Jose Chulchaca	20.8667	-90.1333	1	North America	Lake	Raw	31	AWI	5	-51	8026	269.2	8077	Small cenote. Physiography: karst plain. Surrounding vegetation: secondary thorn scrub.	1989-07-19 00:00:00	Leyden, B.W., Brenner, M., Whitmore, T., Curtis, J.H., Piperno, D.R. and Dahlin, B.H., 1996. A record of long-and short-term climatic variation from northwest Yucatan: Cenote San Jose Chulchaca. In: The Managed Mosaic: Ancient Maya Agriculture and Resource Use ed. by S.L. Fedick (pp.30-50). University of Utah Press, Salt Lake City, Utah, USA.
SJ92		SJ92	10.21233/n34670	Neotoma (last access: 1 April 2021)	2312	2396	Cenote San Jose Chulchaca	20.8667	-90.1333	1	North America	Lake	Raw	27	AWI	3	-53	1817	71.9	1870	Small Cenote. Physiography: karst plain. Surrounding vegetation: secondary thorn scrub.	1992-07-09 00:00:00	Leyden, B.W., Brenner, M., Whitmore, T., Curtis, J.H., Piperno, D.R. and Dahlin, B.H., 1996. A record of long-and short-term climatic variation from northwest Yucatan: Cenote San Jose Chulchaca. In: The Managed Mosaic: Ancient Maya Agriculture and Resource Use ed. by S.L. Fedick (pp.30-50). University of Utah Press, Salt Lake City, Utah, USA.
SLEET		SLEET	10.21233/n3cj33	Neotoma (last access: 1 April 2021)	2392	2476	Sleet Lake	69.2833	-133.583	30	North America	Lake	Raw	77	AWI	5	-51	14643	193.3	14694	Glacial origin lake. Physiography: rolling hills on Tuktoyaktuk Pininsula. Surrounding vegetation: dwarf Betula, Ericaceae, Salix.		Spear, R.W., 1983. Paleoecological approaches to a study of tree line fluctuation in the Mackenzie Delta Region, Northwest Territories: preliminary results. Nordicana, 47, pp.61-72.		Spear, R.W., 1993. The palynological record of Late-Quaternary arctic tree-line in northwest Canada. Review of Palaeobotany and Palynology, 79(1-2), pp.99-111.	https://doi.org/10.1016/0034-6667(93)90040-2
SLOUGHCK		SLOUGHCK	10.21233/n3fv12	Neotoma (last access: 1 April 2021)	2492	2576	Slough Creek Pond	44.9333	-110.35	1884	North America	Lake	Raw	49	AWI	5	-43	15247	318.5	15290	Kettle lake. Physiography: Lamar River Valley, mountainous. Surrounding vegetation: Pseudotsuga parkland.	1992-08-01 00:00:00	Whitlock, C. and Bartlein, P.J., 1993. Spatial variations of Holocene climatic change in the Yellowstone region. Quaternary Research, 39(2), pp.231-238.	https://doi.org/10.1006/qres.1993.1026
SMOOTLK		SMOOTLK	10.21233/n36b6m	Neotoma (last access: 1 April 2021)	2494	2578	Smoot Lake Bog	40.2056	-82.4458	292	North America	Peat	Raw	9	AWI	3	8146	17668	1190.2	9522	Physiography: till plain.		Shane, L.C. and Anderson, K.H., 1993. Intensity, gradients and reversals in late glacial environmental change in east-central North America. Quaternary Science Reviews, 12(5), pp.307-320.	https://doi.org/10.1016/0277-3791(93)90039-O
SMOR	SMOR	SMOR	10.21233/n32j4p	Neotoma (last access: 1 April 2021)	2495	2579	Smorodinovoye Lake	64.7665	141.104	800	Asia	Lake	Raw	76	AWI	11	35	28281	376.6	28246	Glacial lake. Physiography: valley in mountains. Surrounding vegetation: Larix forest.	1995-08-16 00:00:00	Anderson, P.M. and Lozhkin, A.V., 2002. Late Quaternary Vegetation and Climate of Siberia and the Russian Far East (Palynological and Radiocarbon Database). North East Science Center, Far East Branch, Russian Academy of Sciences, Magadan, Russia.		Anderson, P.M., Lozhkin, A.V., Belaya, B.V. and Simakov, K.V., 1998. Younger Dryas in western Beringia (northeastern Siberia). In: Environmental Changes in Beringia During the Quaternary ed. by K.V. Simakov (pp.28-44). North East Interdisciplinary Research Institute, Far East Branch, Russian Academy of Sciences, Magadan (in Russian).
SNOWSHOE		SNOWSHOE	10.21233/n3bt25	Neotoma (last access: 1 April 2021)	2496	2580	Snowshoe Lake	57.16	-119.97	900	North America	Lake	Raw	28	AWI	5	-29	12720	472.2	12749	Lake among oriented glacial features. Physiography: Milligan Hills, rolling uplands. Surrounding vegetation: Picea glauca, P. mariana, Pinus contorta.	1983-04-10 00:00:00	MacDonald, G.M., 1984. Postglacial plant migration and vegetation development in the western Canadian boreal forest. Doctoral dissertation. University of Toronto, Toronto, Ontario, Canada.		MacDonald, G.M., 1987. Postglacial development of the subalpine-boreal transition forest of western Canada. Journal of Ecology, 75(2), pp.303-320.	https://doi.org/10.2307/2260420	MacDonald, G.M. and Cwynar, L.C., 1985. A fossil pollen based reconstruction of the late Quaternary history of lodgepole pine (Pinus contorta ssp. latifolia) in the western interior of Canada. Canadian Journal of Forest Research, 15(6), pp.1039-1044.	https://doi.org/10.1139/x85-168	MacDonald, G.M. and Cwynar, L.C., 1991. Post-glacial population growth rates of Pinus contorta ssp. latifolia in western Canada. Journal of Ecology, 79(2), pp.417-429.	https://doi.org/10.2307/2260723
Sosednee_Lake	Sosednee_Lake	SOSEDNEE	10.21233/n3397q	Neotoma (last access: 1 April 2021)	2499	2583	Sosednee Lake	62.1667	149.5	822	Asia	Lake	Raw	41	AWI	6	-63	26447	662.8	26510	Morainally dammed lake. Physiography: glacial topography in mountains. Surrounding vegetation: open larch forest.	1989-07-01 00:00:00	Lozhkin, A.V., Anderson, P.M., Eisner, W.R., Ravako, L.G., Hopkins, D.M., Brubaker, L.B., Colinvaux, P.A. and Miller, M.C., 1993. Late Quaternary lacustrine pollen records from southwestern Beringia. Quaternary Research, 39(3), pp.314-324.	https://doi.org/10.1006/qres.1993.1038
SPIRIT		SPIRIT	10.21233/n3947v	Neotoma (last access: 1 April 2021)	2502	2586	Spirit Lake	46.47	-86.9583	203	North America	Lake	Raw	53	AWI	6	-18	14140	272.3	14158	Lake with floating mat.	1980-08-27 00:00:00	Woods, K.D. and Davis, M.B., 1989. Paleoecology of range limits: beech in the upper peninsula of Michigan. Ecology, 70(3), pp.681-696.	https://doi.org/10.2307/1940219
SPLAINSG		SPLAINSG	10.21233/n35b4j	Neotoma (last access: 1 April 2021)	2503	2587	Splains Gulch	38.8328	-107.069	3150	North America	Peat	Raw	19	AWI	6	3401	16623	734.6	13222	Sedge peat fen bisected by small stream. Physiography: small basin in glaciated mountains. Surrounding vegetation: Picea engelmannii-Abies lasiocarpa.		Fall, P.L., 1988. Vegetation dynamics in the southern Rocky Mountains: late Pleistocene and Holocene timberline fluctuations. Doctoral dissertation. University of Arizona, Tucson, Arizona, USA.		Fall, P.L., 1997. Timberline fluctuations and late Quaternary paleoclimates in the Southern Rocky Mountains, Colorado. Geological Society of America Bulletin, 109(10), pp.1306-1320.	https://doi.org/10.1130/0016-7606(1997)109<1306:TFALQP>2.3.CO;2
SPLAINSL		SPLAINSL	10.21233/n31n31	Neotoma (last access: 1 April 2021)	2504	2588	Splains Lake	38.8316	-107.078	3165	North America	Lake	Raw	30	AWI	7	-27	18700	645.8	18727	Montane glacial lake (water 1.7 m deep). Physiography: small basin in glaciated mountains. Surrounding vegetation: Picea engelmannii-Abies lasiocarpa.		Fall, P.L., 1988. Vegetation dynamics in the southern Rocky Mountains: late Pleistocene and Holocene timberline fluctuations. Doctoral dissertation. University of Arizona, Tucson, Arizona, USA.		Fall, P.L., 1997. Timberline fluctuations and late Quaternary paleoclimates in the Southern Rocky Mountains, Colorado. Geological Society of America Bulletin, 109(10), pp.1306-1320.	https://doi.org/10.1130/0016-7606(1997)109<1306:TFALQP>2.3.CO;2
SPRINGBC		SPRINGBC	10.21233/n36099	Neotoma (last access: 1 April 2021)	2506	2590	Spring Lake	55.5114	-119.583	835	North America	Lake	Raw	44	AWI	4	0	14534	338	14534	Glacial montane lake. Physiography: glaciated mountain foothills. Surrounding vegetation: Populus,Pinus,Picea;Salix,Betula glndlsa.	1980-03-01 00:00:00	White, J.M. and Mathewes, R.W., 1986. Postglacial vegetation and climatic change in the upper Peace River district, Alberta. Canadian Journal of Botany, 64(10), pp.2305-2318.	https://doi.org/10.1139/b86-302	White, J.M., Mathewes, R.W. and Mathews, W.H., 1985. Late Pleistocene chronology and environment of the "Ice-Free Corridor" of northwestern Alberta. Quaternary Research, 24(2), pp.173-186.	https://doi.org/10.1016/0033-5894(85)90004-3
SPRINGLK		SPRINGLK	10.21233/n3295n	Neotoma (last access: 1 April 2021)	2507	2591	Spring Lake	41.68	-76.35	342	North America	Lake	Raw	47	AWI	6	-61	15386	335.8	15447
SPRUCE		SPRUCE	10.21233/n3cv1f	Neotoma (last access: 1 April 2021)	2508	2593	Spruce Pond	41.2369	-74.1833	223	North America	Lake	Raw	178	AWI	9	67	17506	98.5	17439	Small kettle lake. Physiography: Hudson Highlands. Surrounding vegetation Quercus, Betula, Acer, Fagus, and Liriodendron.	1993-02-01 00:00:00	Maenza-Gmelch, T.E., 1997. Holocene vegetation, climate, and fire history of the Hudson Highlands, southeastern New York, USA. The Holocene, 7(1), pp.25-37.	https://doi.org/10.1177/095968369700700103	Maenza-Gmelch, T.E., 1997. Vegetation, climate, and fire during the late-glacial-Holocene transition at Spruce Pond, Hudson Highlands, southeastern New York, USA. Journal of Quaternary Science, 12(1), pp.15-24.	https://doi.org/10.1002/(SICI)1099-1417(199701/02)12:1<15::AID-JQS283>3.0.CO;2-T
SRRASTRO		SRRASTRO	10.21233/n3848x	Neotoma (last access: 1 April 2021)	2509	2594	Serra do Rio Rastro	-28.55	-49.55	1420	South America	Peat	Raw	30	AWI	5	623	13068	429.1	12445	Peat bog. Physiography: next to the steep escarpment. Surrounding vegetation: grassland.	1989-12-05 00:00:00	Behling, H., 1993. Untersuchungen zur spatpleistozanen und holozanen Vegetations-und Klimageschichte der tropischen Kustenwalder und der Araukarienwalder in Santa Catarina (Sudbrasilien). Dissertationes Botanicae 206. J Cramer, Berlin Stuttgart, Germany.		Behling, H., 1995. Investigations into the Late Pleistocene and Holocene history of vegetation and climate in Santa Catarina (S Brazil). Vegetation History and Archaeobotany, 4(3), pp.127-152.	https://doi.org/10.1007/BF00203932
STAD	STAD1	STAD1	10.21233/n30n3q	Neotoma (last access: 1 April 2021)	2511	2596	Stadukhinskaya Protoka Channel (Alas section)	68.6667	159.5	12	Asia	Peat	Raw	11	AWI	4	6936	9800	286.4	2864	Buried peat and lake silts, alas section. Physiography: yedoma-alas relief. Surrounding vegetation: open Larix dahurica forest.		Anderson, P.M. and Lozhkin, A.V., 2002. Late Quaternary Vegetation and Climate of Siberia and the Russian Far East (Palynological and Radiocarbon Database). North East Science Center, Far East Branch, Russian Academy of Sciences, Magadan, Russia.		Lozhkin, A.V. and Prokhorova, T.P., 1982. New data about the history of alas deposits from the Kolyma lowland (radiocarbon and palynological material). In: Stratigraphy and paleogeography of the late Cenozoic of eastern USSR ed. by S.F. Biske (pp.96-102). North East Interdisciplinary Research Institute, Far East Branch, USSR Academy of Sciences, Magadan (in Russian).
STAGESPD		STAGESPD	10.21233/n35391	Neotoma (last access: 1 April 2021)	2512	2598	Stages Pond	39.67	-82.94	212	North America	Lake	Raw	41	AWI	4	116	4061	98.6	3945	Kettle lake with sedge border. Physiography: dead ice moraine. Surrounding vegetation: Salix/Cephalanthus/Carex.	1988-08-11 00:00:00	Snyder, G.G., Shane, L.C.K. and Kapp, R.O., 1991. Palynological Studies associated with the Mound City Group National Monument, Chillicothe, Ohio. Final Report to the National Park Service.
STJOHN		STJOHN	10.21233/n33f5b	Neotoma (last access: 1 April 2021)	2516	2603	Saint John Island Pond	53.9228	-58.9169	137	North America	Lake	Raw	21	AWI	2	36	7839	390.1	7803		1972-01-01 00:00:00	Jordan, R.H., 1975. Pollen diagrams from Hamilton Inlet, central Labrador, and their environmental implications for the northern Maritime Archaic. Arctic Anthropology, 12(2), pp.92-116.
STOTZEL		STOTZEL	10.21233/n39x9j	Neotoma (last access: 1 April 2021)	2520	2609	Stotzel-Leis Site	40.2167	-84.6894	309	North America	Peat	Raw	74	AWI	11	480	18532	247.3	18052	Fen in oval kettle depression. Physiography: till plain; Bloomer, Union City moraines.	1973-10-01 00:00:00	Shane, L.C., 1976. Late-glacial and postglacial palynology and chronology of Darke County, west-central Ohio. Doctoral dissertation. Kent State University, Kent, Ohio, USA.		Shane, L.C., 1987. Late-glacial vegetational and climatic history of the Allegheny Plateau and the Till Plains of Ohio and Indiana, USA. Boreas, 16(1), pp.1-20.	https://doi.org/10.1111/j.1502-3885.1987.tb00750.x	Shane, L.C. and Anderson, K.H., 1993. Intensity, gradients and reversals in late glacial environmental change in east-central North America. Quaternary Science Reviews, 12(5), pp.307-320.	https://doi.org/10.1016/0277-3791(93)90039-O
SULPHUR		SULPHUR	10.21233/n32f51	Neotoma (last access: 1 April 2021)	2522	2611	Sulphur Lake	60.95	-137.958	847	North America	Lake	Raw	92	AWI	7	-54	13515	149.1	13569	Large two basined lake. Physiography: Shakwak Trench b Kluane Hills/Ruby Range. Surrounding vegetation: Picea glauca dominated forest.		Lacourse, T. and Gajewski, K., 2000. Late Quaternary vegetation history of Sulphur Lake, southwest Yukon Territory, Canada. Arctic, 53(1), pp.27-35.		Lacourse, T., 1998. Late Quaternary vegetation history of Sulphur Lake, southwest Yukon Territory, Canada. Master's thesis. University of Ottawa, Ottawa, Ontario, Canada.
SUMINSK		SUMINSK	10.21233/n3bm23	Neotoma (last access: 1 April 2021)	2523	2612	Suminskoye Zaimitschye Peat Exposure	55	80.25	135	Asia	Peat	Raw	16	AWI	7	62	3828	251.1	3766	Buried in kettlehole exposed by river. Physiography: river valley. Surrounding vegetation: bog in treeless landscape.		Anderson, P.M. and Lozhkin, A.V., 2002. Late Quaternary Vegetation and Climate of Siberia and the Russian Far East (Palynological and Radiocarbon Database). North East Science Center, Far East Branch, Russian Academy of Sciences, Magadan, Russia.		Khotinskiy, N.A., 1977. Holocene of northern Eurasia. Nauka, Moscow (in Russian).		Klimanov, V.A., 1976. To the method of reconstruction of quantitative parameters of past climate. Vestnik MGU, Geographic Series, 2, pp.92-98 (in Russian).		Klimanov, V.A., Levina, T.P., Orlova, L.A. and Panychev, V.A., 1987. Climate changes in the Barabinskaya plain during the Subatlantic period of the Holocene as recorded by Suminskoye Zaimitschye peat. In: Regional Geology of Siberia and the Far East ed. by I.V. Nikolayeva (pp.143-149). Nauka, Novosibirsk (in Russian).		Shnitnikov, A.V., 1976. The lakes of Sredinnogo region and some ways to use them. In: The lakes of Sredinnogo region ed. by L.K. Davydov (pp.5-133). Nauka, Leningrad (in Russian).
SUOLLAKH	SUOLLAKH	SUOLLAKH	10.21233/n33381	Neotoma (last access: 1 April 2021)	2525	2614	Suollakh	57.05	123.85	810	Asia	Peat	Raw	51	AWI	7	2760	13015	205.1	10255			Andreev, A.A. and Klimanov, V.A., 1991. Izmeneniya rastitel'nost i klimatamezhdurech'ya rek Ungra i Yakokit (Yuzhnaya Yakutia) v golotsene [Vegetation history and climate changes in the interfluve of the rivers Ungra and Yakokit (Southern Yakutia) during the Holocene]. Botanichesky Zhurnal, 76(3), pp.334-351 (in Russian).
SURPRISE		SURPRISE	10.21233/n3jf40	Neotoma (last access: 1 April 2021)	2526	2615	Surprise Lake	49.3197	-122.562	540	North America	Lake	Raw	67	AWI	6	40.5	13202	199.4	13161.5	Small, boggy pond. Physiography: hilly to mountainous. Surrounding vegetation: western hemlock/red cedar/ericaceous shb.		Mathewes, R.W., 1973. A palynological study of postglacial vegetation changes in the University Research Forest, southwestern British Columbia. Canadian Journal of Botany, 51(11), pp.2085-2103.	https://doi.org/10.1139/b73-271
SUTHRLND		SUTHRLND	10.21233/n38x8v	Neotoma (last access: 1 April 2021)	2527	2617	Sutherland Pond	41.3914	-74.0378	380	North America	Lake	Raw	179	AWI	11	37	19047	106.8	19010	Small pond. Physiography: Hudson Highlands/steep slopes/ravines. Surrounding vegetation: Tsuga/Liriodendron/Fraxinus/Tilia/Acer.	1991-10-01 00:00:00	Maenza-Gmelch, T.E., 1997. Holocene vegetation, climate, and fire history of the Hudson Highlands, southeastern New York, USA. The Holocene, 7(1), pp.25-37.	https://doi.org/10.1177/095968369700700103	Maenza-Gmelch, T.E., 1997. Late-glacial-early Holocene vegetation, climate, and fire at Sutherland Pond, Hudson Highlands, southeastern New York, USA. Canadian Journal of Botany, 75(3), pp.431-439.	https://doi.org/10.1139/b97-045
SVERDRUP	SVERDRUP	SVERDRUP	10.21233/n3577n	Neotoma (last access: 1 April 2021)	2528	2618	Sverdrup	74.5209	79.4574	7	Asia	Peat	Raw	8	AWI	3	9217	13251	576.3	4034	Buried peat bog 6 m from sea. Physiography: low-relief arctic island. Surrounding vegetation: herb tundra.		Tarasov, P.E., Andreev, A.A., Romanenko, F.A. and Sulerzhitskii, L.D., 1995. Palynostratigraphy of upper Quaternary deposits of Sverdrup Island, the Kara Sea. Stratigraphy and Geological Correlation, 3(2), pp.190-196.
SWAMPLK		SWAMPLK	10.21233/n31f4b	Neotoma (last access: 1 April 2021)	2529	2619	Swamp Lake	37.95	-119.83	1554	North America	Lake	Raw	60	AWI	6	-14	18238	309.4	18252	Small lake. Physiography: Sierra Nevada Mountain Range. Surrounding vegetation: Pinus ponderosa, Pinus jeffreyi.		Smith, S.J., 1989. Pollen and microscopic charcoal analysis of a sediment core from Swamp Lake, Yosemite National Park, California. Doctoral dissertation. Northern Arizona University, Flagstaff, Arizona, U.S.A.		Smith, S.J. and Anderson, R.S., 1992. Late Wisconsin paleoecologic record from Swamp Lake, Yosemite National Park, California. Quaternary Research, 38(1), pp.91-102.	https://doi.org/10.1016/0033-5894(92)90032-E
SWANLAKE		SWANLAKE	10.21233/a7g7-e649	Neotoma (last access: 1 April 2021)	2530	2620	Swan Lake	41.7211	-102.499	1164	North America	Lake	Raw	27	AWI	2	138	10502	398.6	10364		1967-01-01 00:00:00	Stuiver, M., 1969. Yale natural radiocarbon measurements IX. Radiocarbon, 11(2), pp.545-658.	https://doi.org/10.1017/S0033822200011413	Wright Jr, H.E., Almendinger, J.C. and Gruger, J., 1985. Pollen diagram from the Nebraska Sandhills and the age of the dunes. Quaternary Research, 24(1), pp.115-120.	https://doi.org/10.1016/0033-5894(85)90087-0
SWEETLIT		SWEETLIT	10.21233/n32393	Neotoma (last access: 1 April 2021)	2532	2622	Sweet Little Lake	67.65	-132.017	244	North America	Lake	Raw	67	AWI	4	-52	11864	180.5	11916	Small lake. Physiography: rolling hummocky complex of kame and kettl. Surrounding vegetation: Picea/Betula/Salix/Alnus.		Ritchie, J.C., 1984. A Holocene pollen record of boreal forest history from the Travaillant Lake area, Lower Mackenzie River Basin. Canadian Journal of Botany, 62(7), pp.1385-1392.	https://doi.org/10.1139/b84-188
SZABOPND		SZABOPND	10.21233/n3hf52	Neotoma (last access: 1 April 2021)	2533	2623	Szabo Pond	40.4	-74.4833	29	North America	Lake	Raw	24	AWI	3	-18	15956	694.5	15974	Frost-thaw basin, ground ice hollow. Physiography: Inner coastal plain. Surrounding vegetation: Fagus/Acer/Osmunda.	1975-05-28 00:00:00	Watts, W.A., 1979. Late Quaternary vegetation of central Appalachia and the New Jersey coastal plain. Ecological Monographs, 49(4), pp.427-469.	https://doi.org/10.2307/1942471
TAMARACK		TAMARACK	10.21233/n3cr2s	Neotoma (last access: 1 April 2021)	2534	2624	Tamarack Creek	44.15	-91.45	244	North America	Peat	Raw	35	AWI	4	-40	5124	151.9	5164			Davis, A.M., 1977. The prairie-deciduous forest ecotone in the upper middle west. Annals of the Association of American Geographers, 67(2), pp.204-213.	https://doi.org/10.1111/j.1467-8306.1977.tb01133.x	Davis, A.M., 1979. Wetland succession, fire and the pollen record: a midwestern example. American Midland Naturalist, 102(1), pp.86-94.	https://doi.org/10.2307/2425069
TANGLE		TANGLE	10.21233/n37x9x	Neotoma (last access: 1 April 2021)	2535	2625	Tangle Lakes	63.0294	-146.063	867	North America	Lake	Raw	27	AWI	2	168	5320	198.2	5152	Small lake. Physiography: Gulkana Upland. Surrounding vegetation: Betula/Ericales/Spirea/Picea/Populus.		Ager, T.A. and Sims, J.D., 1981. Holocene pollen and sediment record from the Tangle Lakes area, central Alaska. Palynology, 5(1), pp.85-98.	https://doi.org/10.1080/01916122.1981.9989220	Schweger, C.E., 1981. Chronology of late glacial events from the Tangle Lakes, Alaska Range, Alaska. Arctic Anthropology, 18, pp.97-101.		Ager, T.A. and Brubaker, L., 1985. Quaternary palynology and vegetational history of Alaska. In: Pollen records of late-Quaternary North American sediments ed. by V.M. Bryant Jr. and R.G. Holloway (pp.353-384). American Association of Stragigraphic Palynologists Foundation, Dallas, Texas, USA.
TANNERSV		TANNERSV	10.21233/n3477b	Neotoma (last access: 1 April 2021)	2536	2626	Tannersville Bog	41.0389	-75.2638	277	North America	Peat	Raw	95	AWI	5	135	17863	188.6	17728	Poor fen dominated by black spruce (Picea mariana), tamarack (Larix laricina), and an understory of ericaceous shrubs and Sphagnum mosses		Watts, W.A., 1979. Late Quaternary vegetation of central Appalachia and the New Jersey coastal plain. Ecological Monographs, 49(4), pp.427-469.	https://doi.org/10.2307/1942471
TANON	TANON	TANON	10.21233/n30j29	Neotoma (last access: 1 April 2021)	2537	2627	Tanon River [Quarry Site]	59.6667	151.2	40	Asia	Peat	Raw	29	AWI	11	6659	48459	1492.9	41800	Peat, paleosols, alluvium section. Physiography: coastal river valley. Surrounding vegetation: Larix dahurica forest.		Anderson, P.M. and Lozhkin, A.V., 2002. Late Quaternary Vegetation and Climate of Siberia and the Russian Far East (Palynological and Radiocarbon Database). North East Science Center, Far East Branch, Russian Academy of Sciences, Magadan, Russia.		Lozhkin, A.V. and Glushkova, O.Y., 1997. New palynological assemblages and radiocarbon dates from the late Quaternary deposits of northern Priokhot'ye. In: Late Pleistocene and Holocene of Beringia ed. by M.K. Gagiev (pp.70-79). North East Interdisciplinary Research Institute, Far East Branch, Russian Academy of Sciences, Magadan (in Russian).
TAUPAW		TAUPAW	10.21233/n34x1z	Neotoma (last access: 1 April 2021)	2539	2629	Taupawshas Bog	41.275	-70.0583	14	North America	Peat	Raw	30	AWI	3	-26	12679	438.1	12705	Kettle-hole bog. Physiography: moraine. Surrounding vegetation: Nantucket Island coastal heathland.		Dunwiddie, P.W., 1989. Forest and heath: the shaping of the vegetation on Nantucket Island. Journal of Forest History, 33(3), pp.126-133.	https://doi.org/10.2307/4005122
TAYLOR		TAYLOR	10.21233/n3gj2n	Neotoma (last access: 1 April 2021)	2541	2631	Taylor Lake	46.1006	-123.907	4	North America	Lake	Raw	35	AWI	5	-61	4705	140.2	4766	Dune dammed lake. Physiography: Clatsop Plain. Surrounding vegetation: conifers, understory ferns/berries.		Long, C.J. and Whitlock, C., 2002. Fire and vegetation history from the coastal rain forest of the western Oregon Coast Range. Quaternary Research, 58(3), pp.215-225.	https://doi.org/10.1006/qres.2002.2378
TEMPANOS		TÉMPANO S	10.21233/n3cd6v	Neotoma (last access: 1 April 2021)	2545	2635	Témpano Sur	-48.7333	-74.0333	10	South America	Peat	Raw	7	AWI	2	11831	12966	189.2	1135	Section meltwater channel S Temp. fjord. Physiography: Chilean Channels near glacier mouth. Surrounding vegetation: temperate rainforest and moorland.		Ashworth, A.C. and Markgraf, V., 1989. Climate of the Chilean Channels between 11,000 and 10,000 yr BP based on fossil beetle and pollen analyses. Revista Chilena de Historia Natural, 62, pp.61-74.
TENMILE		TENMILE	10.21233/n33x21	Neotoma (last access: 1 April 2021)	2547	2637	Ten Mile Lake	63.12	-145.55	1000	North America	Lake	Raw	37	AWI	4	-68	13825	385.9	13893	Lake in glacial outwash. Physiography: rolling hills to south of Alaska Range. Surrounding vegetation: birch-willow shrub tundra.	1990-07-01 00:00:00	Anderson, P.M., Lozhkin, A.V., Eisner, W.R., Hopkins, D.M., Brubaker, L.B. and Colinvaux, P.A., 1994. Pollen records from ten mile and Wonder Lake, Alaska. Geographie Physique et Quaternaire, 48(2), pp.131-141.
[truncated: 2,848 more rows]

## Sheet: README
Column Name	Description
Event_LegacyPollen	LegacyPollen 2.0 dataset identifer
Event_PANGAEA	PANGAEA dataset identifer
Event_Neotoma	Neotoma dataset identifer
Neotoma_DOI	Neotoma dataset DOI (if Neotoma source)
Data_Source	Data source
[truncated: 34 more rows]
