# Supplementary material for: Global biome changes over the last 21 000 years inferred from model–data comparisons
Source: Copernicus journal article supplement (doi:10.5194/cp-21-1001-2025), 2025-06-11
Supplement: Supplementary file 4 [file Supplementary DataS3-PFTs-Megabiome.xlsx]

## Sheet: Europe
	arctic cold-dediduous malacophyll broad-leaved erect dwarf shrub	arctic cold-dediduous malacophyll broad-leaved low and high shrub	arctic cold-dediduous malacophyll broad-leaved prostrate dwarf shrub	arctic evergreen malacophyll broad-leaved erect dwarf shrub	arctic evergreen malacophyll broad-leaved low and high shrub	arctic evergreen malacophyll broad-leaved prostrate dwarf shrub	arctic evergreen needle- leaved low and high shrub	arctic evergreen need- leaved prostrate dwarf shrub	arctic forb	boreal cold-deciduous malacophyll broad-leaved low and high shrub	boreal cold-deciduous malacophyll broad-leaved tree	boreal deciduous needle- leaved tree	boreal evergreen malacophyll broad-leaved low and high shrub	boreal evergreen needle- leaved tree	cushion shrub	cool-temperate evergreen needle-leaved tree	drought-intolerant small- leaved low and high shrub	drought-tolerant small- leaved low and high shrub	eurythermic drought- tolerant forb	eurythermic evergreen needle-leaved tree	frost-tolerant micro-leaved low and high shrub	grass	halophyte	leaf succulent	micro-leaved tree	sedge	small-leaved tree	stem succulent	temperate cold-deciduous malacophyll broad-leaved low and high shrub	temperate drought-tolerant forb	temperate evergreen needle-leaved tree	temperate cold-deciduous malacophyll broad-leaved tree	tuft tree	warm-temperate cold- deciduous malacophyll broad-leaved low and high shrub	warm-temperate cold- deciduous malacophyll broad-leaved tree	warm-temperate deciduous needle-leaved tree	warm temperate evergreen malacophyll broad-leaved low and high shrub	warm-temperate evergreen malacophyll broad-leaved tree	warm-temperate evergreen needle-leaved tree	warm-temperate evergreen sclerophyll broad-leaved low and high shrub	warm-temperate evergreen sclerophyll broad-leaved tree
Megabiome (name and code)vs. PFTs (name and code)	ar.cd.mb.eds	ar.cd.mb.lhs	ar.cd.mb.pds	ar.e.mb.eds	ar.e.mb.lhs	ar.e.mb.pds	ar.e.n.lhs	ar.e.n.pds	ar.fb	bo.cd.mb.lhs	bo.cd.mb.t	bo.d.n.t	bo.e.mb.lhs	bo.e.n.t	cs	c.te.e.n.t	di.sl.lhs	dt.sl.lhs	eu.dt.fb	eu.e.n.t	ft.ml.lhs	g	ha	lsuc	ml.t	s	sl.t	ssuc	te.cd.mb.lhs	te.dt.fb	te.e.n.t	te.cd.mb.t	tu.t	wt.cd.mb.lhs	wt.cd.mb.t	wt.d.n.t	wt.e.mb.lhs	wt.e.mb.t	wt.e.n.t	wt.e.sb.lhs	wt.e.sb.t
Warm-temperate (subtropical) forest (WTFO)	0	0	0	0	0	0	0	0	0	0	0	0	0	0	0	0	0	0	0	1	0	1	0	0	0	1	0	0	0	0	0	0	0	1	1	1	1	1	1	1	1
Temperate forest (TEFO)	0	0	0	0	0	0	0	0	0	0	0	0	0	0	0	1	0	0	0	1	0	1	0	0	0	1	0	0	1	0	1	1	0	1	1	0	0	0	0	0	0
Boreal forest (BOFO)	0	0	0	0	0	0	0	0	0	1	1	1	1	1	0	0	0	0	0	1	0	1	0	0	0	1	0	0	0	0	0	0	0	0	0	0	0	0	0	0	0
(Warm) savanna and dry woodland (SAVA)	0	0	0	0	0	0	0	0	0	0	0	0	0	0	0	0	0	0	0	0	0	1	0	0	1	1	0	0	0	0	0	0	1	0	0	0	0	0	0	0	0
Grassland and dry shrubland (STEP)	0	0	0	0	0	0	0	0	0	0	0	0	0	0	0	0	1	1	1	0	0	1	0	0	0	1	1	0	0	1	0	0	0	0	0	0	0	0	0	0	0
(Warm) desert (DESE)	0	0	0	0	0	0	0	0	0	0	0	0	0	0	1	0	0	1	1	0	1	1	1	1	0	0	0	1	0	0	0	0	0	0	0	0	0	0	0	0	0
Tundra and polar desert (TUND)	1	1	1	1	1	1	1	1	1	0	0	0	0	0	0	0	0	0	0	0	0	1	0	0	0	1	0	0	0	0	0	0	0	0	0	0	0	0	0	0	0

## Sheet: Asia
	arctic cold-dediduous malacophyll broad-leaved erect dwarf shrub	arctic cold-dediduous malacophyll broad-leaved low and high shrub	arctic cold-dediduous malacophyll broad-leaved prostrate dwarf shrub	arctic evergreen malacophyll broad-leaved erect dwarf shrub	arctic evergreen malacophyll broad-leaved low and high shrub	arctic evergreen malacophyll broad-leaved prostrate dwarf shrub	arctic evergreen needle- leaved low and high shrub	arctic evergreen need- leaved prostrate dwarf shrub	arctic forb	boreal cold-deciduous malacophyll broad-leaved low and high shrub	boreal cold-deciduous malacophyll broad-leaved tree	boreal deciduous needle- leaved tree	boreal evergreen malacophyll broad-leaved low and high shrub	boreal evergreen needle- leaved tree	cushion shrub	cool-temperate evergreen needle-leaved tree	drought-intolerant small- leaved low and high shrub	drought-tolerant small- leaved low and high shrub	eurythermic drought- tolerant forb	eurythermic evergreen needle-leaved tree	frost-tolerant micro-leaved low and high shrub	grass	halophyte	leaf succulent	micro-leaved tree	sedge	small-leaved tree	stem succulent	temperate cold-deciduous malacophyll broad-leaved low and high shrub	temperate drought-tolerant forb	temperate evergreen needle-leaved tree	temperate cold-deciduous malacophyll broad-leaved tree	tropical evergreen malacophyll broad-leaved low and high shrub	tropical evergreen malacophyll broad-leaved tree	tropical evergreen sclerophyll broad-leaved tree	tropical mesic drought-deciduous malacophyll low and high shrub	tropical mesic drought- deciduous malacophyll broad-leaved tree	tropical xeric drought- deciduous malacophyll low and high shrub	tropical xeric drought- deciduous malacophyll broad-leaved tree	tuft tree	warm-temperate cold- deciduous malacophyll broad-leaved low and high shrub	warm-temperate cold- deciduous malacophyll broad-leaved tree	warm-temperate deciduous needle-leaved tree	warm temperate evergreen malacophyll broad-leaved low and high shrub	warm-temperate evergreen malacophyll broad-leaved tree	warm-temperate evergreen needle-leaved tree	warm-temperate evergreen sclerophyll broad-leaved low and high shrub	warm-temperate evergreen sclerophyll broad-leaved tree	mangrove
Megabiome (name and code)vs. PFTs (name and code)	ar.cd.mb.eds	ar.cd.mb.lhs	ar.cd.mb.pds	ar.e.mb.eds	ar.e.mb.lhs	ar.e.mb.pds	ar.e.n.lhs	ar.e.n.pds	ar.fb	bo.cd.mb.lhs	bo.cd.mb.t	bo.d.n.t	bo.e.mb.lhs	bo.e.n.t	cs	c.te.e.n.t	di.sl.lhs	dt.sl.lhs	eu.dt.fb	eu.e.n.t	ft.ml.lhs	g	ha	lsuc	ml.t	s	sl.t	ssuc	te.cd.mb.lhs	te.dt.fb	te.e.n.t	te.cd.mb.t	tr.e.mb.lhs	tr.e.mb.t	tr.e.sb.t	tr.m.dd.mb.lhs	tr.m.dd.mb.t	tr.x.dd.mb.lhs	tr.x.dd.mb.t	tu.t	wt.cd.mb.lhs	wt.cd.mb.t	wt.d.n.t	wt.e.mb.lhs	wt.e.mb.t	wt.e.n.t	wt.e.sb.lhs	wt.e.sb.t	man
Tropical forest (TRFO)	0	0	0	0	0	0	0	0	0	0	0	0	0	0	0	0	0	0	0	0	0	1	0	0	0	1	0	0	0	0	0	0	1	1	1	1	1	1	1	1	0	0	0	0	1	1	0	0	1
Warm-temperate (subtropical) forest (WTFO)	0	0	0	0	0	0	0	0	0	0	0	0	0	0	0	0	0	0	0	1	0	1	0	0	0	1	0	0	0	0	0	0	0	0	0	0	0	0	0	0	1	1	1	1	1	1	1	1	0
Temperate forest (TEFO)	0	0	0	0	0	0	0	0	0	0	0	0	0	0	0	1	0	0	0	1	0	1	0	0	0	1	0	0	1	0	1	1	0	0	0	0	0	0	0	0	1	1	0	0	0	0	0	0	0
Boreal forest (BOFO)	0	0	0	0	0	0	0	0	0	1	1	1	1	1	0	0	0	0	0	1	0	1	0	0	0	1	0	0	0	0	0	0	0	0	0	0	0	0	0	0	0	0	0	0	0	0	0	0	0
(Warm) savanna and dry woodland (SAVA)	0	0	0	0	0	0	0	0	0	0	0	0	0	0	0	0	0	0	0	0	0	1	0	0	1	1	0	0	0	0	0	0	0	0	0	1	1	1	1	1	0	0	0	0	0	0	0	0	0
Grassland and dry shrubland (STEP)	0	0	0	0	0	0	0	0	0	0	0	0	0	0	0	0	1	1	1	0	0	1	0	0	0	1	1	0	0	1	0	0	0	0	0	0	0	0	0	0	0	0	0	0	0	0	0	0	0
(Warm) desert (DESE)	0	0	0	0	0	0	0	0	0	0	0	0	0	0	1	0	0	1	1	0	1	1	1	1	0	0	0	1	0	0	0	0	0	0	0	0	0	0	0	0	0	0	0	0	0	0	0	0	0
Tundra and polar desert (TUND)	1	1	1	1	1	1	1	1	1	0	0	0	0	0	0	0	0	0	0	0	0	1	0	0	0	1	0	0	0	0	0	0	0	0	0	0	0	0	0	0	0	0	0	0	0	0	0	0	0

## Sheet: North America
	arctic cold-dediduous malacophyll broad-leaved erect dwarf shrub	arctic cold-dediduous malacophyll broad-leaved low and high shrub	arctic cold-dediduous malacophyll broad-leaved prostrate dwarf shrub	arctic evergreen malacophyll broad-leaved erect dwarf shrub	arctic evergreen malacophyll broad-leaved low and high shrub	arctic evergreen malacophyll broad-leaved prostrate dwarf shrub	arctic evergreen needle- leaved low and high shrub	arctic evergreen need- leaved prostrate dwarf shrub	arctic forb	boreal cold-deciduous malacophyll broad-leaved low and high shrub	boreal cold-deciduous malacophyll broad-leaved tree	boreal deciduous needle- leaved tree	boreal evergreen malacophyll broad-leaved low and high shrub	boreal evergreen needle- leaved tree	cushion shrub	cool-temperate evergreen needle-leaved tree	drought-intolerant small- leaved low and high shrub	drought-tolerant small- leaved low and high shrub	eurythermic drought- tolerant forb	eurythermic evergreen needle-leaved tree	frost-tolerant micro-leaved low and high shrub	grass	halophyte	leaf succulent	micro-leaved tree	sedge	small-leaved tree	stem succulent	temperate cold-deciduous malacophyll broad-leaved low and high shrub	temperate drought-tolerant forb	temperate evergreen needle-leaved tree	temperate cold-deciduous malacophyll broad-leaved tree	tropical evergreen malacophyll broad-leaved low and high shrub	tropical evergreen malacophyll broad-leaved tree	tropical evergreen sclerophyll broad-leaved tree	tropical mesic drought-deciduous malacophyll low and high shrub	tropical mesic drought- deciduous malacophyll broad-leaved tree	tropical xeric drought- deciduous malacophyll low and high shrub	tropical xeric drought- deciduous malacophyll broad-leaved tree	tuft tree	warm-temperate cold- deciduous malacophyll broad-leaved low and high shrub	warm-temperate cold- deciduous malacophyll broad-leaved tree	warm-temperate deciduous needle-leaved tree	warm temperate evergreen malacophyll broad-leaved low and high shrub	warm-temperate evergreen malacophyll broad-leaved tree	warm-temperate evergreen needle-leaved tree	mangrove
Megabiome (name and code)vs. PFTs (name and code)	ar.cd.mb.eds	ar.cd.mb.lhs	ar.cd.mb.pds	ar.e.mb.eds	ar.e.mb.lhs	ar.e.mb.pds	ar.e.n.lhs	ar.e.n.pds	ar.fb	bo.cd.mb.lhs	bo.cd.mb.t	bo.d.n.t	bo.e.mb.lhs	bo.e.n.t	cs	c.te.e.n.t	di.sl.lhs	dt.sl.lhs	eu.dt.fb	eu.e.n.t	ft.ml.lhs	g	ha	lsuc	ml.t	s	sl.t	ssuc	te.cd.mb.lhs	te.dt.fb	te.e.n.t	te.cd.mb.t	tr.e.mb.lhs	tr.e.mb.t	tr.e.sb.t	tr.m.dd.mb.lhs	tr.m.dd.mb.t	tr.x.dd.mb.lhs	tr.x.dd.mb.t	tu.t	wt.cd.mb.lhs	wt.cd.mb.t	wt.d.n.t	wt.e.mb.lhs	wt.e.mb.t	wt.e.n.t	man
Tropical forest (TRFO)	0	0	0	0	0	0	0	0	0	0	0	0	0	0	0	0	0	0	0	0	0	1	0	0	0	1	0	0	0	0	0	0	1	1	1	1	1	1	1	1	0	0	0	0	0	1	1
Warm-temperate (subtropical) forest (WTFO)	0	0	0	0	0	0	0	0	0	0	0	0	0	0	0	0	0	0	0	1	0	1	0	0	0	1	0	0	0	0	0	0	0	0	0	0	0	0	0	0	1	1	1	1	1	1	0
Temperate forest (TEFO)	0	0	0	0	0	0	0	0	0	0	0	0	0	0	0	1	0	0	0	1	0	1	0	0	0	1	0	0	1	0	1	1	0	0	0	0	0	0	0	0	1	1	0	0	0	0	0
Boreal forest (BOFO)	0	0	0	0	0	0	0	0	0	1	1	1	1	1	0	0	0	0	0	1	0	1	0	0	0	1	0	0	0	0	0	0	0	0	0	0	0	0	0	0	0	0	0	0	0	0	0
(Warm) savanna and dry woodland (SAVA)	0	0	0	0	0	0	0	0	0	0	0	0	0	0	0	0	0	0	0	0	0	1	0	0	1	1	0	0	0	0	0	0	0	0	0	1	1	1	1	1	0	0	0	0	0	0	0
Grassland and dry shrubland (STEP)	0	0	0	0	0	0	0	0	0	0	0	0	0	0	0	0	1	1	1	0	0	1	0	0	0	1	1	0	0	1	0	0	0	0	0	0	0	0	0	0	0	0	0	0	0	0	0
(Warm) desert (DESE)	0	0	0	0	0	0	0	0	0	0	0	0	0	0	1	0	0	1	1	0	1	1	1	1	0	0	0	1	0	0	0	0	0	0	0	0	0	0	0	0	0	0	0	0	0	0	0
Tundra and polar desert (TUND)	1	1	1	1	1	1	1	1	1	0	0	0	0	0	0	0	0	0	0	0	0	1	0	0	0	1	0	0	0	0	0	0	0	0	0	0	0	0	0	0	0	0	0	0	0	0	0

## Sheet: Africa
	temperate broad- and needle-leaved evergreen/deciduous tree/shrub	warm-temperate broad- and needle-leaved evergreen/deciduous tree/shrub	tropical evergreen tree/shrub	wet tropical raingreen tree/shrub	driest tropical raingreen tree/shrub	steppe forb/shrub	desert forb/shrub	grass graminoid
Megabiome (name and code)vs. PFTs (name and code)	tss	wte	te	tr1	tr3	sf	df	g
Tropical forest (TRFO)	0	0	1	1	1	0	0	0
Warm-temperate (subtropical) forest (WTFO)	0	1	0	0	0	0	0	0
Temperate forest (TEFO)	1	0	0	0	0	0	0	0
(Warm) savanna and dry woodland (SAVA)	0	0	0	0	1	0	0	1
Grassland and dry shrubland (STEP)	0	0	0	0	0	1	0	1
(Warm) desert (DESE)	0	0	0	0	0	0	1	1

## Sheet: Indo-Pacific
	arctic/ alpine forb	arctic/ alpine dwarf shrub	boreal cold-deciduous malacophyll broad-leaved low and high shrub	boreal cold-deciduous malacophyll broad-leaved tree	boreal needle-leaved tree/shrub	temperate drought tolerant forb	drought-tolerant low and high shrub	grass graminoid	sedge graminoid	temperate drought-intolerant forb	temperate malacophyll broad‐leaved low or high shrub	temperate malacophyll broad‐leaved tree	temperate needle-leaved tree/shrub	tropical drought‐intolerant forb	tropical drought‐deciduous broad‐leaved low or high shrub	tropical drought‐deciduous malacophyll broad‐leaved tree	tropical evergreen malacophyll broad‐leaved low or high shrub	tropical evergreen malacophyll broad‐leaved tree	mangrove	warm-temperate malacophyll broad-leaved low and high shrub	warm-temperate malacophyll broad-leaved tree	warm-temperate needle-leaved tree/shrub
Megabiome (name and code)vs. PFTs (name and code)	ar.fb	ar.ds	bo.cd.mb.lhs	bo.cd.mb.t	bo.n.t	te.dt.fb	dt.lhs	g	s	te.di.fb	te.mb.lhs	te.mb.t	te.n.t	tr.di.fb	tr.dd.mb.Ihs	tr.dd.mb.t	tr.e.mb.lhs	tr.e.mb.t	man	wt.mb.lhs	wt.mb.t	wt.n.t
Tropical forest (TRFO)	0	0	0	0	0	0	0	1	1	0	0	0	0	1	0	0	1	1	1	0	0	1
Warm-temperate (subtropical) forest (WTFO)	0	0	0	0	0	0	0	1	1	0	0	0	0	1	0	0	0	0	0	1	1	1
Temperate forest (TEFO)	0	0	0	0	0	0	0	1	1	1	1	1	1	0	0	0	0	0	0	0	0	0
Boreal forest (BOFO)	0	0	1	1	1	0	0	1	1	0	0	0	0	0	0	0	0	0	0	0	0	0
(Warm) savanna and dry woodland (SAVA)	0	0	0	0	0	1	1	1	1	0	0	0	0	0	1	1	0	0	0	0	0	0
Grassland and dry shrubland (STEP)	0	0	0	0	0	1	1	1	1	0	0	0	0	0	0	0	0	0	0	0	0	0
(Warm) desert (DESE)	0	0	0	0	0	1	1	1	0	0	0	0	0	0	0	0	0	0	0	0	0	0
Tundra and polar desert (TUND)	1	1	0	0	0	0	0	1	1	0	0	0	0	0	0	0	0	0	0	0	0	0

## Sheet: South America
	arctic/alpine dwarf shrub	arctic/alpine forb	cold temperate conifer tree/shrub	cold temperate summergreen tree/shrub	desert forb/ scrub	graminoid	sedge	steppe forb/ scrub	tropical forb	tropical raingreen tree/shrub	tropical seasonal raingreen tree/shrub	tropical dry tree/shrub	temperate summergreen tree/shrub	temperate evergreen broad-leaved tree/shrub	temperate forb	cool temperate conifer tree/shrub	warm temperate conifer tree/shrub	warm temperate evergreen broad-leaved tree/shrub	warm temperate summergreen broad-leaved tree/shrub
Megabiome (name and code)vs. PFTs (name and code)	aa	af	ctc2	ct	df	g	s	sf	tf	Tr1	Tr2	txts	ts	ts1	tef	ctc1	wtc	wte	wte1
Tropical forest (TRFO)	0	0	0	0	0	1	1	0	1	1	1	0	0	0	0	0	1	0	0
Warm-temperate (subtropical) forest (WTFO)	0	0	0	0	0	1	1	0	0	0	0	0	0	0	1	0	1	1	1
Temperate forest (TEFO)	0	0	0	0	0	1	1	0	0	0	0	0	1	1	1	1	0	0	0
Boreal forest (BOFO)	0	1	1	1	0	1	1	0	0	0	0	0	0	0	0	0	0	0	0
(Warm) savanna and dry woodland (SAVA)	0	0	0	0	0	1	1	0	1	0	1	1	0	0	0	0	0	0	0
Grassland and dry shrubland (STEP)	0	0	0	0	0	1	1	1	0	0	0	0	0	0	0	0	0	0	0
(Warm) desert (DESE)	0	0	0	0	1	1	0	0	0	0	0	0	0	0	0	0	0	0	0
Tundra and polar desert (TUND)	1	1	0	0	0	1	1	0	0	0	0	0	0	0	0	0	0	0	0
